# Supplementary material for: An improved bacterial single-cell RNA-seq reveals biofilm heterogeneity
Source: eLife. 2024 Dec 17;13:RP97543. doi: 10.7554/eLife.97543 (PMC11651652; doi:10.7554/eLife.97543)
Supplement: Figure 1—figure supplement 1—source data 1. [file elife-97543-fig1-figsupp1-data1.xls]

## Sheet: Figure 1-figure supplement 1A
UMIs per cell of recovered cells		Figure 1-figure supplement 1A
RiboD-PETRI		The median of UMIs
1141		RiboD-PETRI
1061		40
873
685
662
607
548
544
535
524
507
470
462
446
443
441
423
422
410
399
387
380
378
376
366
360
360
350
346
343
340
332
330
330
329
323
323
322
322
316
316
313
312
311
305
302
300
299
299
298
292
290
289
285
284
283
283
279
276
275
275
275
270
268
267
265
261
260
260
258
258
258
257
256
255
255
254
251
249
249
248
248
247
247
244
244
243
243
241
241
241
239
237
236
235
235
235
232
231
228
227
227
227
227
226
226
225
225
225
225
224
223
223
223
222
222
221
220
220
220
219
218
217
216
215
215
213
213
213
212
212
212
212
211
211
211
211
210
210
210
210
209
209
208
208
207
207
206
205
204
204
203
203
203
203
202
201
201
201
201
201
201
201
201
200
200
199
198
198
198
197
197
197
197
197
196
196
196
196
196
195
195
195
195
195
193
193
193
192
192
191
191
191
190
190
190
189
189
188
188
187
186
186
186
186
185
185
185
185
185
184
184
184
184
184
184
184
184
183
183
182
182
182
182
182
182
181
181
181
180
180
180
180
180
179
179
179
178
178
177
177
177
177
177
177
177
177
176
176
176
176
176
176
175
175
175
175
175
175
174
174
174
174
174
174
173
173
173
173
173
173
173
173
173
172
172
172
172
171
171
171
171
170
170
170
170
169
169
169
168
168
168
168
167
167
167
167
167
166
166
166
166
165
165
165
165
164
164
164
164
164
163
163
163
162
162
162
162
162
161
161
160
160
160
160
160
160
160
160
160
159
159
159
158
158
158
158
158
157
157
157
157
157
157
157
157
156
156
156
156
156
155
155
155
155
155
155
155
155
154
154
154
154
154
154
154
154
154
154
154
153
153
153
153
153
153
153
153
152
152
152
152
152
152
152
152
152
152
151
151
151
151
151
151
151
151
150
150
150
150
150
149
149
149
149
149
149
149
149
149
148
148
148
148
148
148
148
148
148
147
147
147
147
147
147
147
146
146
146
146
146
146
146
146
146
146
145
145
145
145
145
145
145
144
144
144
144
144
144
144
144
144
144
144
143
143
143
143
143
143
143
143
143
143
142
142
142
142
142
142
142
142
142
142
142
142
142
141
141
141
141
141
141
141
141
141
141
141
141
141
141
140
140
140
140
140
140
139
139
139
139
139
139
139
139
139
139
139
139
138
138
138
138
138
138
138
138
138
138
138
137
137
137
137
137
137
137
137
137
137
137
137
137
136
136
136
136
136
136
136
136
136
136
136
136
136
136
136
135
135
135
135
135
135
135
135
134
134
134
134
134
134
134
134
134
134
134
134
134
134
133
133
133
133
133
133
133
133
133
133
133
133
132
132
132
132
132
132
132
132
132
132
132
132
131
131
131
131
131
131
131
131
131
131
131
131
131
131
130
130
130
130
130
130
130
130
130
130
130
130
129
129
129
129
129
129
129
129
129
129
129
129
129
129
129
129
129
129
128
128
128
128
128
128
128
128
128
128
128
128
128
128
128
128
128
127
127
127
127
127
127
127
127
127
127
127
127
127
127
127
127
127
127
127
127
126
126
126
126
126
126
126
126
126
126
126
126
126
126
126
126
125
125
125
125
125
125
125
125
125
125
125
125
125
125
125
125
125
125
125
125
125
124
124
124
124
124
124
124
124
124
124
124
124
124
124
124
124
123
123
123
123
123
123
123
123
123
123
123
123
123
123
123
123
123
122
122
122
122
122
122
122
122
122
122
122
122
122
122
122
122
122
122
122
122
121
121
121
121
121
121
121
121
121
121
121
121
121
121
121
121
121
121
121
120
120
120
120
120
120
120
120
120
120
120
120
120
120
120
120
119
119
119
119
119
119
119
119
119
119
119
119
119
119
119
119
119
119
119
119
119
119
118
118
118
118
118
118
118
118
118
118
118
118
118
118
118
118
118
118
118
118
118
118
117
117
117
117
117
117
117
117
117
117
117
117
117
117
117
117
117
117
116
116
116
116
116
116
116
116
116
116
116
116
116
116
116
116
116
116
116
116
116
116
116
115
115
115
115
115
115
115
115
115
115
115
115
115
115
115
115
115
115
115
115
115
115
115
114
114
114
114
114
114
114
114
114
114
114
114
114
114
114
114
114
114
113
113
113
113
113
113
113
113
113
113
113
113
113
113
113
113
113
113
113
113
113
112
112
112
112
112
112
112
112
112
112
112
112
112
112
112
112
112
112
112
112
112
112
112
112
111
111
111
111
111
111
111
111
111
111
111
111
111
111
111
111
111
111
111
111
111
111
111
111
110
110
110
110
110
110
110
110
110
110
110
110
110
110
110
110
110
110
110
110
110
110
110
110
110
110
110
110
110
109
109
109
109
109
109
109
109
109
109
109
109
109
109
109
109
109
109
109
109
109
109
109
109
109
109
109
109
109
109
109
109
109
109
109
109
109
109
109
109
109
109
109
108
108
108
108
108
108
108
108
108
108
108
108
108
108
108
108
108
108
108
108
108
108
108
108
108
107
107
107
107
107
107
107
107
107
107
107
107
107
107
107
107
107
107
107
107
107
107
107
107
107
107
107
107
106
106
106
106
106
106
106
106
106
106
106
106
106
106
106
106
106
106
106
106
106
106
106
106
106
106
106
106
106
106
106
106
106
106
106
106
106
106
105
105
105
105
105
105
105
105
105
105
105
105
105
105
105
105
105
105
105
105
105
105
105
104
104
104
104
104
104
104
104
104
104
104
104
104
104
104
104
104
104
104
104
104
104
104
104
104
104
104
104
104
104
104
104
104
104
104
104
104
104
104
104
104
104
104
104
103
103
103
103
103
103
103
103
103
103
103
103
103
103
103
103
103
103
103
103
103
103
103
103
103
103
103
103
103
103
103
103
103
102
102
102
102
102
102
102
102
102
102
102
102
102
102
102
102
102
102
102
102
102
102
102
102
102
102
102
102
102
102
102
102
102
101
101
101
101
101
101
101
101
101
101
101
101
101
101
101
101
101
101
101
101
101
101
101
101
100
100
100
100
100
100
100
100
100
100
100
100
100
100
100
100
100
100
100
100
100
100
100
100
99
99
99
99
99
99
99
99
99
99
99
99
99
99
99
99
99
99
99
99
99
99
99
99
99
99
99
99
99
99
99
99
99
99
99
99
99
99
99
99
99
99
99
99
98
98
98
98
98
98
98
98
98
98
98
98
98
98
98
98
98
98
98
98
98
98
98
98
98
98
98
98
98
98
98
98
98
98
98
97
97
97
97
97
97
97
97
97
97
97
97
97
97
97
97
97
97
97
97
97
97
97
97
97
97
97
97
97
97
97
97
97
97
97
97
97
97
97
97
97
97
97
97
97
97
97
97
97
97
97
97
97
97
96
96
96
96
96
96
96
96
96
96
96
96
96
96
96
96
96
96
96
96
96
96
96
96
96
96
96
96
96
96
96
96
96
96
96
96
96
96
96
96
96
96
96
96
95
95
95
95
95
95
95
95
95
95
95
95
95
95
95
95
95
95
95
95
95
95
95
95
95
95
95
95
95
95
95
95
95
95
95
95
95
95
95
95
95
95
95
95
95
95
95
95
95
95
95
95
95
94
94
94
94
94
94
94
94
94
94
94
94
94
94
94
94
94
94
94
94
94
94
94
94
94
94
94
94
94
94
94
94
94
94
94
94
93
93
93
93
93
93
93
93
93
93
93
93
93
93
93
93
93
93
93
93
93
93
93
93
93
93
93
93
93
93
93
93
93
93
93
93
93
93
93
93
93
93
93
93
93
93
93
93
93
93
93
93
93
93
93
92
92
92
92
92
92
92
92
92
92
92
92
92
92
92
92
92
92
92
92
92
92
92
92
92
92
92
92
92
92
92
92
92
92
92
92
92
92
92
92
92
92
92
92
92
91
91
91
91
91
91
91
91
91
91
91
91
91
91
91
91
91
91
91
91
91
91
91
91
91
91
91
91
91
91
91
91
91
91
91
91
91
91
91
91
91
91
91
90
90
90
90
90
90
90
90
90
90
90
90
90
90
90
90
90
90
90
90
90
90
90
90
90
90
90
90
90
90
90
90
90
90
90
90
90
89
89
89
89
89
89
89
89
89
89
89
89
89
89
89
89
89
89
89
89
89
89
89
89
89
89
89
89
89
89
89
89
89
89
89
89
89
89
89
89
89
89
89
89
89
89
89
89
89
89
88
88
88
88
88
88
88
88
88
88
88
88
88
88
88
88
88
88
88
88
88
88
88
88
88
88
88
88
88
88
88
88
88
88
88
88
88
88
88
88
88
88
88
88
88
88
88
88
88
88
88
88
88
88
88
88
88
88
88
88
88
88
88
88
88
88
88
88
88
87
87
87
87
87
87
87
87
87
87
87
87
87
87
87
87
87
87
87
87
87
87
87
87
87
87
87
87
87
87
87
87
87
87
87
87
87
87
87
87
87
87
87
87
87
87
87
87
87
87
87
87
87
87
87
87
87
87
87
87
87
87
87
87
87
87
87
87
87
86
86
86
86
86
86
86
86
86
86
86
86
86
86
86
86
86
86
86
86
86
86
86
86
86
[truncated: 18,177 more rows]

## Sheet: Figure 1-figure supplement 1B
UMIs per cell of recovered cells		Figure 1-figure supplement 1B
PETRI-seq		The median of UMIs
239		PETRI-seq
218		20
170
159
156
156
154
150
141
141
133
130
128
118
117
115
112
105
104
103
100
98
98
98
97
96
95
94
93
93
92
90
89
88
88
88
87
87
86
85
85
84
82
81
81
79
79
78
78
77
77
77
76
75
75
75
75
74
74
74
74
74
74
73
73
73
73
73
72
72
72
72
72
71
71
71
70
69
69
68
68
67
67
67
66
66
66
66
65
65
65
65
64
64
64
64
63
63
63
63
63
63
63
62
62
62
62
62
62
61
61
61
61
61
61
60
60
60
60
60
59
59
59
59
59
58
58
58
58
58
58
57
57
57
57
57
57
56
56
56
56
56
56
56
56
55
55
55
55
55
55
55
55
55
54
54
54
54
54
54
54
54
54
54
54
53
53
53
53
53
52
52
52
52
52
52
52
52
52
52
51
51
51
51
51
51
51
51
51
51
51
51
51
50
50
50
50
50
50
50
50
50
50
50
49
49
49
49
49
49
49
49
49
49
49
49
49
49
49
49
49
49
49
49
49
49
49
48
48
48
48
48
48
48
48
48
48
48
48
48
48
47
47
47
47
47
47
47
47
47
47
47
47
47
47
47
47
47
47
46
46
46
46
46
46
46
46
46
46
46
46
46
46
46
46
46
46
46
46
46
45
45
45
45
45
45
45
45
45
45
45
45
45
45
44
44
44
44
44
44
44
44
44
44
44
44
44
44
44
44
44
44
44
44
44
44
44
43
43
43
43
43
43
43
43
43
43
43
43
43
43
43
43
43
43
43
43
43
43
43
43
43
43
42
42
42
42
42
42
42
42
42
42
42
42
42
42
42
42
42
42
42
42
42
42
42
42
41
41
41
41
41
41
41
41
41
41
41
41
41
41
41
41
41
41
41
41
41
41
41
41
41
41
41
41
40
40
40
40
40
40
40
40
40
40
40
40
40
40
40
40
40
40
40
40
40
40
40
40
40
40
40
40
40
40
40
40
39
39
39
39
39
39
39
39
39
39
39
39
39
39
39
39
39
39
39
39
39
39
39
39
39
39
39
39
39
39
38
38
38
38
38
38
38
38
38
38
38
38
38
38
38
38
38
38
38
38
38
38
38
38
38
38
38
38
38
38
38
38
38
38
38
38
38
38
38
38
38
38
38
38
38
38
37
37
37
37
37
37
37
37
37
37
37
37
37
37
37
37
37
37
37
37
37
37
37
37
37
37
37
37
37
37
37
37
36
36
36
36
36
36
36
36
36
36
36
36
36
36
36
36
36
36
36
36
36
36
36
36
36
36
36
36
36
36
36
36
36
36
36
36
36
36
36
36
36
36
36
36
35
35
35
35
35
35
35
35
35
35
35
35
35
35
35
35
35
35
35
35
35
35
35
35
35
35
35
35
35
35
35
35
35
35
35
35
35
35
35
35
35
35
35
35
35
35
35
35
35
35
35
35
35
35
35
35
35
35
35
35
35
35
35
35
35
34
34
34
34
34
34
34
34
34
34
34
34
34
34
34
34
34
34
34
34
34
34
34
34
34
34
34
34
34
34
34
34
34
34
34
34
34
34
34
34
34
34
34
34
34
34
34
34
34
34
34
34
34
34
34
34
34
34
33
33
33
33
33
33
33
33
33
33
33
33
33
33
33
33
33
33
33
33
33
33
33
33
33
33
33
33
33
33
33
33
33
33
33
33
33
33
33
33
33
33
33
33
33
33
33
33
33
33
33
33
33
33
33
32
32
32
32
32
32
32
32
32
32
32
32
32
32
32
32
32
32
32
32
32
32
32
32
32
32
32
32
32
32
32
32
32
32
32
32
32
32
32
32
32
32
32
32
32
32
32
32
32
32
32
32
32
32
32
32
32
32
32
32
32
32
31
31
31
31
31
31
31
31
31
31
31
31
31
31
31
31
31
31
31
31
31
31
31
31
31
31
31
31
31
31
31
31
31
31
31
31
31
31
31
31
31
31
31
31
31
31
31
31
31
31
31
31
31
31
31
31
31
31
31
31
31
31
31
31
31
31
31
31
31
31
30
30
30
30
30
30
30
30
30
30
30
30
30
30
30
30
30
30
30
30
30
30
30
30
30
30
30
30
30
30
30
30
30
30
30
30
30
30
30
30
30
30
30
30
30
30
30
30
30
30
30
30
30
30
30
30
30
30
30
30
30
30
30
30
30
30
30
30
30
30
30
30
30
30
30
30
30
30
30
30
30
30
30
30
30
30
30
30
30
29
29
29
29
29
29
29
29
29
29
29
29
29
29
29
29
29
29
29
29
29
29
29
29
29
29
29
29
29
29
29
29
29
29
29
29
29
29
29
29
29
29
29
29
29
29
29
29
29
29
29
29
29
29
29
29
29
29
29
29
29
29
29
29
29
29
29
29
29
29
29
29
29
29
29
29
29
29
29
29
29
29
29
29
29
29
29
29
29
29
29
29
29
29
29
29
29
29
29
29
29
29
29
29
29
29
29
29
29
29
28
28
28
28
28
28
28
28
28
28
28
28
28
28
28
28
28
28
28
28
28
28
28
28
28
28
28
28
28
28
28
28
28
28
28
28
28
28
28
28
28
28
28
28
28
28
28
28
28
28
28
28
28
28
28
28
28
28
28
28
28
28
28
28
28
28
28
28
28
28
28
28
28
28
28
28
28
28
28
28
28
28
28
28
28
28
28
28
28
28
28
28
28
28
28
28
28
28
28
28
28
28
28
28
28
28
28
28
28
28
28
28
28
28
28
28
28
28
28
28
28
28
28
28
27
27
27
27
27
27
27
27
27
27
27
27
27
27
27
27
27
27
27
27
27
27
27
27
27
27
27
27
27
27
27
27
27
27
27
27
27
27
27
27
27
27
27
27
27
27
27
27
27
27
27
27
27
27
27
27
27
27
27
27
27
27
27
27
27
27
27
27
27
27
27
27
27
27
27
27
27
27
27
27
27
27
27
27
27
27
27
27
27
27
27
27
27
27
27
27
27
27
27
27
27
27
27
27
27
27
27
27
27
27
27
27
27
27
27
27
27
27
27
27
27
27
27
27
26
26
26
26
26
26
26
26
26
26
26
26
26
26
26
26
26
26
26
26
26
26
26
26
26
26
26
26
26
26
26
26
26
26
26
26
26
26
26
26
26
26
26
26
26
26
26
26
26
26
26
26
26
26
26
26
26
26
26
26
26
26
26
26
26
26
26
26
26
26
26
26
26
26
26
26
26
26
26
26
26
26
26
26
26
26
26
26
26
26
26
26
26
26
26
26
26
26
26
26
26
26
26
26
26
26
26
26
26
26
26
26
26
26
26
26
26
26
26
26
26
26
26
26
25
25
25
25
25
25
25
25
25
25
25
25
25
25
25
25
25
25
25
25
25
25
25
25
25
25
25
25
25
25
25
25
25
25
25
25
25
25
25
25
25
25
25
25
25
25
25
25
25
25
25
25
25
25
25
25
25
25
25
25
25
25
25
25
25
25
25
25
25
25
25
25
25
25
25
25
25
25
25
25
25
25
25
25
25
25
25
25
25
25
25
25
25
25
25
25
25
25
25
25
25
25
25
25
25
25
25
25
25
25
25
25
25
25
25
25
25
25
25
25
25
25
25
25
25
25
25
25
25
25
25
25
25
25
25
25
25
25
25
25
25
25
25
25
25
25
25
25
25
25
25
24
24
24
24
24
24
24
24
24
24
24
24
24
24
24
24
24
24
24
24
24
24
24
24
24
24
24
24
24
24
24
24
24
24
24
24
24
24
24
24
24
24
24
24
24
24
24
24
24
24
24
24
24
24
24
24
24
24
24
24
24
24
24
24
24
24
24
24
24
24
24
24
24
24
24
24
24
24
24
24
24
24
24
24
24
24
24
24
24
24
24
24
24
24
24
24
24
24
24
24
24
24
24
24
24
24
24
24
24
24
24
24
24
24
24
24
24
24
24
24
24
24
24
24
24
24
24
24
24
24
24
24
24
24
24
24
24
24
24
24
24
24
24
24
24
24
24
24
24
24
24
24
24
24
24
24
24
24
24
24
24
24
24
24
24
24
24
24
24
24
24
24
24
24
24
24
24
24
24
24
24
24
24
24
24
24
24
23
23
23
23
23
23
23
23
23
23
23
23
23
23
23
23
23
23
23
23
23
23
23
23
23
23
23
23
23
23
23
23
23
23
23
23
23
23
23
23
23
23
23
23
23
23
23
23
23
23
23
23
23
23
23
23
23
23
23
23
23
23
23
23
23
23
23
23
23
23
23
23
23
23
23
23
23
23
23
23
23
23
23
23
23
23
23
23
23
23
23
23
23
23
23
23
23
23
23
23
23
23
23
23
23
23
23
23
23
23
23
23
23
23
23
23
23
23
23
23
23
23
23
23
23
23
23
23
23
23
23
23
23
23
23
23
23
23
23
23
23
23
23
23
23
23
23
23
23
23
23
23
23
23
23
23
23
23
23
23
23
23
23
23
23
23
23
23
23
23
23
23
23
23
23
23
23
23
23
23
23
23
23
23
23
23
23
23
23
23
23
23
23
23
23
23
23
23
23
23
[truncated: 3,646 more rows]

## Sheet: Figure 1-figure supplement 1C
Correlation analysis between UMIs and reads of cells	Data of exponential period E. coli				Figure 1-figure supplement 1C. Pearson correlation coefficient
	cell barcodes	UMIs	reads		sample estimates: cor=0.98
	0427_3_bc1_1_bc2_1_bc3_1	12	249		p-value < 2.2e-16
	0427_3_bc1_1_bc2_1_bc3_93	19	310
	0427_3_bc1_1_bc2_10_bc3_29	30	813
	0427_3_bc1_1_bc2_10_bc3_49	23	606
	0427_3_bc1_1_bc2_10_bc3_67	307	7780
	0427_3_bc1_1_bc2_10_bc3_72	258	5701
	0427_3_bc1_1_bc2_10_bc3_93	44	1017
	0427_3_bc1_1_bc2_11_bc3_14	9	174
	0427_3_bc1_1_bc2_11_bc3_4	51	775
	0427_3_bc1_1_bc2_11_bc3_49	20	542
	0427_3_bc1_1_bc2_11_bc3_54	60	902
	0427_3_bc1_1_bc2_11_bc3_64	287	7933
	0427_3_bc1_1_bc2_12_bc3_83	50	879
	0427_3_bc1_1_bc2_13_bc3_43	60	1008
	0427_3_bc1_1_bc2_13_bc3_45	38	630
	0427_3_bc1_1_bc2_13_bc3_64	203	4892
	0427_3_bc1_1_bc2_13_bc3_91	30	409
	0427_3_bc1_1_bc2_14_bc3_22	24	382
	0427_3_bc1_1_bc2_14_bc3_46	13	149
	0427_3_bc1_1_bc2_15_bc3_11	39	727
	0427_3_bc1_1_bc2_15_bc3_27	16	278
	0427_3_bc1_1_bc2_15_bc3_30	24	476
	0427_3_bc1_1_bc2_15_bc3_96	30	423
	0427_3_bc1_1_bc2_16_bc3_46	20	349
	0427_3_bc1_1_bc2_16_bc3_60	26	490
	0427_3_bc1_1_bc2_16_bc3_87	18	456
	0427_3_bc1_1_bc2_17_bc3_2	28	546
	0427_3_bc1_1_bc2_17_bc3_26	42	606
	0427_3_bc1_1_bc2_17_bc3_40	44	1015
	0427_3_bc1_1_bc2_17_bc3_43	15	379
	0427_3_bc1_1_bc2_17_bc3_61	35	429
	0427_3_bc1_1_bc2_17_bc3_7	22	41
	0427_3_bc1_1_bc2_17_bc3_71	26	364
	0427_3_bc1_1_bc2_18_bc3_11	42	783
	0427_3_bc1_1_bc2_18_bc3_77	260	5864
	0427_3_bc1_1_bc2_19_bc3_18	201	5656
	0427_3_bc1_1_bc2_19_bc3_63	29	553
	0427_3_bc1_1_bc2_2_bc3_22	24	311
	0427_3_bc1_1_bc2_2_bc3_70	22	474
	0427_3_bc1_1_bc2_2_bc3_72	23	452
	0427_3_bc1_1_bc2_20_bc3_27	19	234
	0427_3_bc1_1_bc2_20_bc3_39	34	446
	0427_3_bc1_1_bc2_20_bc3_56	41	1028
	0427_3_bc1_1_bc2_20_bc3_94	27	457
	0427_3_bc1_1_bc2_21_bc3_20	16	282
	0427_3_bc1_1_bc2_21_bc3_49	35	737
	0427_3_bc1_1_bc2_21_bc3_56	31	778
	0427_3_bc1_1_bc2_21_bc3_8	9	331
	0427_3_bc1_1_bc2_21_bc3_89	32	699
	0427_3_bc1_1_bc2_21_bc3_92	65	1080
	0427_3_bc1_1_bc2_22_bc3_20	32	438
	0427_3_bc1_1_bc2_22_bc3_23	16	312
	0427_3_bc1_1_bc2_22_bc3_4	27	599
	0427_3_bc1_1_bc2_22_bc3_47	20	598
	0427_3_bc1_1_bc2_22_bc3_54	11	300
	0427_3_bc1_1_bc2_22_bc3_58	34	410
	0427_3_bc1_1_bc2_22_bc3_60	53	906
	0427_3_bc1_1_bc2_22_bc3_86	27	393
	0427_3_bc1_1_bc2_22_bc3_93	35	862
	0427_3_bc1_1_bc2_23_bc3_18	20	142
	0427_3_bc1_1_bc2_23_bc3_31	15	390
	0427_3_bc1_1_bc2_23_bc3_45	43	810
	0427_3_bc1_1_bc2_24_bc3_19	13	416
	0427_3_bc1_1_bc2_24_bc3_29	13	220
	0427_3_bc1_1_bc2_24_bc3_85	33	255
	0427_3_bc1_1_bc2_25_bc3_2	55	624
	0427_3_bc1_1_bc2_25_bc3_45	54	766
	0427_3_bc1_1_bc2_25_bc3_46	63	892
	0427_3_bc1_1_bc2_25_bc3_5	17	391
	0427_3_bc1_1_bc2_26_bc3_37	25	644
	0427_3_bc1_1_bc2_27_bc3_30	15	306
	0427_3_bc1_1_bc2_27_bc3_75	18	476
	0427_3_bc1_1_bc2_27_bc3_8	47	596
	0427_3_bc1_1_bc2_28_bc3_46	40	947
	0427_3_bc1_1_bc2_28_bc3_55	47	651
	0427_3_bc1_1_bc2_29_bc3_45	21	264
	0427_3_bc1_1_bc2_29_bc3_49	20	295
	0427_3_bc1_1_bc2_29_bc3_50	229	5770
	0427_3_bc1_1_bc2_29_bc3_95	30	538
	0427_3_bc1_1_bc2_3_bc3_21	28	381
	0427_3_bc1_1_bc2_3_bc3_75	8	10
	0427_3_bc1_1_bc2_30_bc3_28	28	202
	0427_3_bc1_1_bc2_30_bc3_34	21	287
	0427_3_bc1_1_bc2_30_bc3_45	49	873
	0427_3_bc1_1_bc2_30_bc3_47	24	363
	0427_3_bc1_1_bc2_30_bc3_5	18	253
	0427_3_bc1_1_bc2_30_bc3_82	223	4559
	0427_3_bc1_1_bc2_31_bc3_2	14	354
	0427_3_bc1_1_bc2_31_bc3_29	15	333
	0427_3_bc1_1_bc2_31_bc3_76	31	737
	0427_3_bc1_1_bc2_31_bc3_85	23	378
	0427_3_bc1_1_bc2_32_bc3_3	25	380
	0427_3_bc1_1_bc2_32_bc3_31	47	926
	0427_3_bc1_1_bc2_32_bc3_58	26	648
	0427_3_bc1_1_bc2_32_bc3_6	16	311
	0427_3_bc1_1_bc2_32_bc3_64	34	694
	0427_3_bc1_1_bc2_33_bc3_64	31	671
	0427_3_bc1_1_bc2_33_bc3_80	39	807
	0427_3_bc1_1_bc2_33_bc3_90	23	342
	0427_3_bc1_1_bc2_33_bc3_91	286	7534
	0427_3_bc1_1_bc2_34_bc3_10	45	422
	0427_3_bc1_1_bc2_34_bc3_27	23	383
	0427_3_bc1_1_bc2_34_bc3_30	18	435
	0427_3_bc1_1_bc2_34_bc3_50	19	322
	0427_3_bc1_1_bc2_34_bc3_57	24	494
	0427_3_bc1_1_bc2_34_bc3_61	25	418
	0427_3_bc1_1_bc2_34_bc3_90	35	383
	0427_3_bc1_1_bc2_34_bc3_94	39	767
	0427_3_bc1_1_bc2_35_bc3_17	11	328
	0427_3_bc1_1_bc2_37_bc3_24	16	382
	0427_3_bc1_1_bc2_37_bc3_81	21	634
	0427_3_bc1_1_bc2_37_bc3_89	16	384
	0427_3_bc1_1_bc2_39_bc3_40	33	718
	0427_3_bc1_1_bc2_39_bc3_67	8	165
	0427_3_bc1_1_bc2_39_bc3_8	23	279
	0427_3_bc1_1_bc2_4_bc3_49	16	243
	0427_3_bc1_1_bc2_4_bc3_95	28	619
	0427_3_bc1_1_bc2_40_bc3_41	31	404
	0427_3_bc1_1_bc2_40_bc3_42	15	209
	0427_3_bc1_1_bc2_40_bc3_62	11	260
	0427_3_bc1_1_bc2_40_bc3_84	26	572
	0427_3_bc1_1_bc2_40_bc3_85	35	638
	0427_3_bc1_1_bc2_42_bc3_86	15	286
	0427_3_bc1_1_bc2_43_bc3_54	48	706
	0427_3_bc1_1_bc2_44_bc3_42	24	434
	0427_3_bc1_1_bc2_44_bc3_55	36	608
	0427_3_bc1_1_bc2_45_bc3_21	22	567
	0427_3_bc1_1_bc2_46_bc3_37	25	393
	0427_3_bc1_1_bc2_46_bc3_77	56	835
	0427_3_bc1_1_bc2_48_bc3_55	18	351
	0427_3_bc1_1_bc2_48_bc3_79	41	602
	0427_3_bc1_1_bc2_49_bc3_30	43	853
	0427_3_bc1_1_bc2_49_bc3_41	52	591
	0427_3_bc1_1_bc2_49_bc3_76	37	612
	0427_3_bc1_1_bc2_50_bc3_13	37	659
	0427_3_bc1_1_bc2_50_bc3_70	45	709
	0427_3_bc1_1_bc2_51_bc3_19	58	834
	0427_3_bc1_1_bc2_51_bc3_82	14	371
	0427_3_bc1_1_bc2_51_bc3_87	17	79
	0427_3_bc1_1_bc2_52_bc3_26	66	857
	0427_3_bc1_1_bc2_52_bc3_48	23	249
	0427_3_bc1_1_bc2_52_bc3_54	25	496
	0427_3_bc1_1_bc2_53_bc3_37	38	681
	0427_3_bc1_1_bc2_53_bc3_61	37	728
	0427_3_bc1_1_bc2_54_bc3_34	19	312
	0427_3_bc1_1_bc2_54_bc3_36	25	387
	0427_3_bc1_1_bc2_54_bc3_62	29	364
	0427_3_bc1_1_bc2_54_bc3_65	42	858
	0427_3_bc1_1_bc2_56_bc3_13	15	284
	0427_3_bc1_1_bc2_56_bc3_14	29	499
	0427_3_bc1_1_bc2_56_bc3_22	218	6405
	0427_3_bc1_1_bc2_56_bc3_81	32	781
	0427_3_bc1_1_bc2_57_bc3_10	22	402
	0427_3_bc1_1_bc2_57_bc3_19	29	674
	0427_3_bc1_1_bc2_57_bc3_4	31	284
	0427_3_bc1_1_bc2_57_bc3_63	18	353
	0427_3_bc1_1_bc2_57_bc3_86	16	211
	0427_3_bc1_1_bc2_58_bc3_2	23	472
	0427_3_bc1_1_bc2_58_bc3_26	28	441
	0427_3_bc1_1_bc2_59_bc3_43	26	358
	0427_3_bc1_1_bc2_59_bc3_90	27	349
	0427_3_bc1_1_bc2_6_bc3_46	19	220
	0427_3_bc1_1_bc2_6_bc3_92	19	118
	0427_3_bc1_1_bc2_60_bc3_10	51	528
	0427_3_bc1_1_bc2_60_bc3_65	59	972
	0427_3_bc1_1_bc2_60_bc3_90	20	318
	0427_3_bc1_1_bc2_61_bc3_49	13	416
	0427_3_bc1_1_bc2_62_bc3_17	15	242
	0427_3_bc1_1_bc2_62_bc3_3	23	363
	0427_3_bc1_1_bc2_62_bc3_36	43	1166
	0427_3_bc1_1_bc2_62_bc3_43	22	554
	0427_3_bc1_1_bc2_62_bc3_58	23	367
	0427_3_bc1_1_bc2_62_bc3_74	26	90
	0427_3_bc1_1_bc2_63_bc3_47	21	675
	0427_3_bc1_1_bc2_64_bc3_42	32	528
	0427_3_bc1_1_bc2_65_bc3_43	26	294
	0427_3_bc1_1_bc2_66_bc3_24	31	447
	0427_3_bc1_1_bc2_66_bc3_25	36	467
	0427_3_bc1_1_bc2_66_bc3_83	30	457
	0427_3_bc1_1_bc2_67_bc3_27	51	880
	0427_3_bc1_1_bc2_69_bc3_1	14	405
	0427_3_bc1_1_bc2_69_bc3_64	23	446
	0427_3_bc1_1_bc2_7_bc3_11	11	297
	0427_3_bc1_1_bc2_7_bc3_12	16	140
	0427_3_bc1_1_bc2_7_bc3_24	24	390
	0427_3_bc1_1_bc2_7_bc3_25	17	279
	0427_3_bc1_1_bc2_7_bc3_41	35	516
	0427_3_bc1_1_bc2_7_bc3_45	28	463
	0427_3_bc1_1_bc2_70_bc3_19	14	318
	0427_3_bc1_1_bc2_71_bc3_31	12	222
	0427_3_bc1_1_bc2_71_bc3_37	21	393
	0427_3_bc1_1_bc2_71_bc3_52	32	506
	0427_3_bc1_1_bc2_72_bc3_16	14	354
	0427_3_bc1_1_bc2_72_bc3_24	47	768
	0427_3_bc1_1_bc2_72_bc3_29	22	367
	0427_3_bc1_1_bc2_72_bc3_74	47	823
	0427_3_bc1_1_bc2_73_bc3_92	9	227
	0427_3_bc1_1_bc2_74_bc3_69	346	7066
	0427_3_bc1_1_bc2_75_bc3_67	29	569
	0427_3_bc1_1_bc2_75_bc3_81	47	1160
	0427_3_bc1_1_bc2_76_bc3_12	26	387
	0427_3_bc1_1_bc2_76_bc3_54	209	5191
	0427_3_bc1_1_bc2_76_bc3_81	25	665
	0427_3_bc1_1_bc2_77_bc3_18	19	406
	0427_3_bc1_1_bc2_77_bc3_22	46	964
	0427_3_bc1_1_bc2_77_bc3_25	31	511
	0427_3_bc1_1_bc2_77_bc3_72	15	378
	0427_3_bc1_1_bc2_77_bc3_75	18	278
	0427_3_bc1_1_bc2_78_bc3_19	22	256
	0427_3_bc1_1_bc2_78_bc3_76	35	731
	0427_3_bc1_1_bc2_79_bc3_17	19	306
	0427_3_bc1_1_bc2_79_bc3_60	12	57
	0427_3_bc1_1_bc2_79_bc3_82	15	263
	0427_3_bc1_1_bc2_80_bc3_30	26	347
	0427_3_bc1_1_bc2_80_bc3_48	24	491
	0427_3_bc1_1_bc2_81_bc3_24	23	632
	0427_3_bc1_1_bc2_81_bc3_31	16	417
	0427_3_bc1_1_bc2_81_bc3_55	31	545
	0427_3_bc1_1_bc2_81_bc3_62	256	5734
	0427_3_bc1_1_bc2_81_bc3_86	21	343
	0427_3_bc1_1_bc2_82_bc3_2	29	270
	0427_3_bc1_1_bc2_82_bc3_32	10	146
	0427_3_bc1_1_bc2_82_bc3_33	25	492
	0427_3_bc1_1_bc2_82_bc3_69	33	1116
	0427_3_bc1_1_bc2_84_bc3_15	34	733
	0427_3_bc1_1_bc2_86_bc3_62	41	800
	0427_3_bc1_1_bc2_87_bc3_22	18	315
	0427_3_bc1_1_bc2_87_bc3_44	66	690
	0427_3_bc1_1_bc2_87_bc3_69	34	550
	0427_3_bc1_1_bc2_88_bc3_64	38	618
	0427_3_bc1_1_bc2_88_bc3_70	50	789
	0427_3_bc1_1_bc2_89_bc3_68	38	973
	0427_3_bc1_1_bc2_89_bc3_83	19	555
	0427_3_bc1_1_bc2_9_bc3_52	15	377
	0427_3_bc1_1_bc2_9_bc3_79	36	654
	0427_3_bc1_1_bc2_90_bc3_5	349	6854
	0427_3_bc1_1_bc2_90_bc3_86	52	872
	0427_3_bc1_1_bc2_91_bc3_23	22	376
	0427_3_bc1_1_bc2_91_bc3_47	16	314
	0427_3_bc1_1_bc2_91_bc3_85	15	357
	0427_3_bc1_1_bc2_91_bc3_86	17	392
	0427_3_bc1_1_bc2_92_bc3_51	20	267
	0427_3_bc1_1_bc2_92_bc3_65	12	250
	0427_3_bc1_1_bc2_93_bc3_21	59	1017
	0427_3_bc1_1_bc2_93_bc3_44	52	1031
	0427_3_bc1_1_bc2_94_bc3_83	26	516
	0427_3_bc1_1_bc2_95_bc3_23	10	14
	0427_3_bc1_1_bc2_95_bc3_53	49	1043
	0427_3_bc1_1_bc2_95_bc3_75	31	390
	0427_3_bc1_1_bc2_95_bc3_84	18	223
	0427_3_bc1_1_bc2_95_bc3_94	35	668
	0427_3_bc1_10_bc2_1_bc3_64	24	441
	0427_3_bc1_10_bc2_11_bc3_58	21	318
	0427_3_bc1_10_bc2_12_bc3_91	44	682
	0427_3_bc1_10_bc2_13_bc3_22	12	227
	0427_3_bc1_10_bc2_14_bc3_8	36	554
	0427_3_bc1_10_bc2_15_bc3_17	59	1039
	0427_3_bc1_10_bc2_16_bc3_21	41	760
	0427_3_bc1_10_bc2_16_bc3_40	65	850
	0427_3_bc1_10_bc2_16_bc3_80	20	271
	0427_3_bc1_10_bc2_16_bc3_94	36	789
	0427_3_bc1_10_bc2_17_bc3_19	32	844
	0427_3_bc1_10_bc2_17_bc3_42	34	756
	0427_3_bc1_10_bc2_17_bc3_76	379	10024
	0427_3_bc1_10_bc2_17_bc3_81	36	721
	0427_3_bc1_10_bc2_18_bc3_23	75	1090
	0427_3_bc1_10_bc2_18_bc3_35	33	558
	0427_3_bc1_10_bc2_18_bc3_62	33	728
	0427_3_bc1_10_bc2_19_bc3_44	17	371
	0427_3_bc1_10_bc2_19_bc3_85	15	206
	0427_3_bc1_10_bc2_19_bc3_92	70	1315
	0427_3_bc1_10_bc2_20_bc3_3	23	373
	0427_3_bc1_10_bc2_21_bc3_17	42	577
	0427_3_bc1_10_bc2_22_bc3_23	63	1145
	0427_3_bc1_10_bc2_22_bc3_55	28	410
	0427_3_bc1_10_bc2_22_bc3_76	21	343
	0427_3_bc1_10_bc2_22_bc3_83	22	642
	0427_3_bc1_10_bc2_22_bc3_88	20	242
	0427_3_bc1_10_bc2_23_bc3_10	15	304
	0427_3_bc1_10_bc2_23_bc3_23	18	276
	0427_3_bc1_10_bc2_23_bc3_26	39	687
	0427_3_bc1_10_bc2_23_bc3_40	18	382
	0427_3_bc1_10_bc2_23_bc3_90	21	321
	0427_3_bc1_10_bc2_24_bc3_18	14	474
	0427_3_bc1_10_bc2_24_bc3_23	11	128
	0427_3_bc1_10_bc2_24_bc3_33	20	386
	0427_3_bc1_10_bc2_24_bc3_9	17	354
	0427_3_bc1_10_bc2_25_bc3_15	38	682
	0427_3_bc1_10_bc2_25_bc3_24	23	489
	0427_3_bc1_10_bc2_25_bc3_36	29	544
	0427_3_bc1_10_bc2_25_bc3_8	40	681
	0427_3_bc1_10_bc2_25_bc3_82	21	414
	0427_3_bc1_10_bc2_26_bc3_52	19	260
	0427_3_bc1_10_bc2_26_bc3_62	30	621
	0427_3_bc1_10_bc2_27_bc3_27	12	339
	0427_3_bc1_10_bc2_27_bc3_68	384	9312
	0427_3_bc1_10_bc2_27_bc3_86	38	465
	0427_3_bc1_10_bc2_28_bc3_16	217	5619
	0427_3_bc1_10_bc2_28_bc3_17	37	580
	0427_3_bc1_10_bc2_29_bc3_10	28	215
	0427_3_bc1_10_bc2_29_bc3_11	41	920
	0427_3_bc1_10_bc2_29_bc3_38	50	828
	0427_3_bc1_10_bc2_29_bc3_7	23	165
	0427_3_bc1_10_bc2_29_bc3_91	18	128
	0427_3_bc1_10_bc2_3_bc3_4	14	323
	0427_3_bc1_10_bc2_3_bc3_47	28	404
	0427_3_bc1_10_bc2_3_bc3_64	19	310
	0427_3_bc1_10_bc2_30_bc3_51	30	715
	0427_3_bc1_10_bc2_30_bc3_62	14	296
	0427_3_bc1_10_bc2_30_bc3_74	22	275
	0427_3_bc1_10_bc2_30_bc3_75	24	429
	0427_3_bc1_10_bc2_30_bc3_84	22	412
	0427_3_bc1_10_bc2_30_bc3_90	12	251
	0427_3_bc1_10_bc2_31_bc3_15	32	442
	0427_3_bc1_10_bc2_31_bc3_30	33	318
	0427_3_bc1_10_bc2_31_bc3_5	36	553
	0427_3_bc1_10_bc2_32_bc3_50	11	435
	0427_3_bc1_10_bc2_32_bc3_57	15	417
	0427_3_bc1_10_bc2_32_bc3_68	20	328
	0427_3_bc1_10_bc2_32_bc3_82	33	788
	0427_3_bc1_10_bc2_33_bc3_25	19	476
	0427_3_bc1_10_bc2_33_bc3_40	32	510
	0427_3_bc1_10_bc2_33_bc3_71	290	6433
	0427_3_bc1_10_bc2_35_bc3_18	25	797
	0427_3_bc1_10_bc2_35_bc3_63	19	341
	0427_3_bc1_10_bc2_37_bc3_19	31	568
	0427_3_bc1_10_bc2_37_bc3_50	25	543
	0427_3_bc1_10_bc2_38_bc3_54	23	433
	0427_3_bc1_10_bc2_39_bc3_37	26	271
	0427_3_bc1_10_bc2_39_bc3_61	412	10596
	0427_3_bc1_10_bc2_4_bc3_21	44	1105
	0427_3_bc1_10_bc2_4_bc3_4	35	663
	0427_3_bc1_10_bc2_4_bc3_49	44	840
	0427_3_bc1_10_bc2_4_bc3_66	250	5578
	0427_3_bc1_10_bc2_4_bc3_67	27	367
	0427_3_bc1_10_bc2_40_bc3_26	18	398
	0427_3_bc1_10_bc2_40_bc3_57	14	462
	0427_3_bc1_10_bc2_41_bc3_2	33	353
	0427_3_bc1_10_bc2_41_bc3_21	15	332
	0427_3_bc1_10_bc2_41_bc3_68	24	553
	0427_3_bc1_10_bc2_44_bc3_34	26	298
	0427_3_bc1_10_bc2_44_bc3_51	34	906
	0427_3_bc1_10_bc2_44_bc3_53	32	882
	0427_3_bc1_10_bc2_45_bc3_53	20	353
	0427_3_bc1_10_bc2_46_bc3_52	24	763
	0427_3_bc1_10_bc2_47_bc3_19	20	354
	0427_3_bc1_10_bc2_47_bc3_51	65	1141
	0427_3_bc1_10_bc2_47_bc3_60	55	697
	0427_3_bc1_10_bc2_47_bc3_68	21	435
	0427_3_bc1_10_bc2_48_bc3_50	22	340
	0427_3_bc1_10_bc2_48_bc3_6	39	460
	0427_3_bc1_10_bc2_48_bc3_68	79	1327
	0427_3_bc1_10_bc2_48_bc3_78	14	287
	0427_3_bc1_10_bc2_48_bc3_85	24	551
	0427_3_bc1_10_bc2_49_bc3_25	58	793
	0427_3_bc1_10_bc2_49_bc3_32	19	308
	0427_3_bc1_10_bc2_49_bc3_34	40	823
	0427_3_bc1_10_bc2_49_bc3_39	20	207
	0427_3_bc1_10_bc2_49_bc3_9	22	435
	0427_3_bc1_10_bc2_49_bc3_92	32	453
	0427_3_bc1_10_bc2_50_bc3_45	27	340
	0427_3_bc1_10_bc2_50_bc3_83	28	523
	0427_3_bc1_10_bc2_51_bc3_54	49	698
	0427_3_bc1_10_bc2_51_bc3_87	23	661
	0427_3_bc1_10_bc2_52_bc3_1	35	672
	0427_3_bc1_10_bc2_52_bc3_90	47	637
	0427_3_bc1_10_bc2_53_bc3_1	13	250
	0427_3_bc1_10_bc2_53_bc3_31	20	358
	0427_3_bc1_10_bc2_53_bc3_55	26	217
	0427_3_bc1_10_bc2_53_bc3_81	20	414
	0427_3_bc1_10_bc2_53_bc3_83	67	1450
	0427_3_bc1_10_bc2_53_bc3_94	31	432
	0427_3_bc1_10_bc2_53_bc3_96	24	465
	0427_3_bc1_10_bc2_54_bc3_30	214	5808
	0427_3_bc1_10_bc2_54_bc3_66	37	823
	0427_3_bc1_10_bc2_54_bc3_71	15	243
	0427_3_bc1_10_bc2_54_bc3_74	32	550
	0427_3_bc1_10_bc2_56_bc3_43	20	472
	0427_3_bc1_10_bc2_56_bc3_59	33	572
	0427_3_bc1_10_bc2_56_bc3_79	254	6592
	0427_3_bc1_10_bc2_56_bc3_95	11	324
	0427_3_bc1_10_bc2_57_bc3_14	14	270
	0427_3_bc1_10_bc2_57_bc3_80	34	694
	0427_3_bc1_10_bc2_57_bc3_91	18	95
	0427_3_bc1_10_bc2_58_bc3_83	22	585
	0427_3_bc1_10_bc2_59_bc3_26	24	82
	0427_3_bc1_10_bc2_59_bc3_40	60	1030
	0427_3_bc1_10_bc2_59_bc3_79	45	660
	0427_3_bc1_10_bc2_59_bc3_85	33	588
	0427_3_bc1_10_bc2_6_bc3_68	37	653
	0427_3_bc1_10_bc2_60_bc3_20	317	7986
	0427_3_bc1_10_bc2_60_bc3_39	31	718
	0427_3_bc1_10_bc2_60_bc3_45	56	918
	0427_3_bc1_10_bc2_60_bc3_6	25	318
	0427_3_bc1_10_bc2_60_bc3_69	372	9480
	0427_3_bc1_10_bc2_60_bc3_80	56	898
	0427_3_bc1_10_bc2_60_bc3_82	24	586
	0427_3_bc1_10_bc2_61_bc3_29	16	290
	0427_3_bc1_10_bc2_61_bc3_65	38	859
	0427_3_bc1_10_bc2_61_bc3_89	78	984
	0427_3_bc1_10_bc2_62_bc3_93	37	725
	0427_3_bc1_10_bc2_63_bc3_33	23	472
	0427_3_bc1_10_bc2_63_bc3_90	23	519
	0427_3_bc1_10_bc2_64_bc3_55	66	990
	0427_3_bc1_10_bc2_64_bc3_56	13	265
	0427_3_bc1_10_bc2_64_bc3_7	13	174
	0427_3_bc1_10_bc2_65_bc3_93	68	1293
	0427_3_bc1_10_bc2_66_bc3_14	55	1005
	0427_3_bc1_10_bc2_66_bc3_26	65	906
	0427_3_bc1_10_bc2_66_bc3_32	30	411
	0427_3_bc1_10_bc2_66_bc3_35	20	142
	0427_3_bc1_10_bc2_66_bc3_49	40	988
	0427_3_bc1_10_bc2_67_bc3_22	25	317
	0427_3_bc1_10_bc2_67_bc3_26	60	1007
	0427_3_bc1_10_bc2_67_bc3_68	54	1033
	0427_3_bc1_10_bc2_67_bc3_74	26	455
	0427_3_bc1_10_bc2_67_bc3_9	23	658
	0427_3_bc1_10_bc2_68_bc3_86	17	264
	0427_3_bc1_10_bc2_69_bc3_38	18	438
	0427_3_bc1_10_bc2_69_bc3_83	33	658
	0427_3_bc1_10_bc2_7_bc3_37	15	236
	0427_3_bc1_10_bc2_7_bc3_59	18	259
	0427_3_bc1_10_bc2_7_bc3_67	19	481
	0427_3_bc1_10_bc2_7_bc3_79	14	162
	0427_3_bc1_10_bc2_71_bc3_67	39	830
	0427_3_bc1_10_bc2_71_bc3_92	16	286
	0427_3_bc1_10_bc2_73_bc3_45	59	1192
	0427_3_bc1_10_bc2_73_bc3_83	44	686
	0427_3_bc1_10_bc2_73_bc3_88	20	488
	0427_3_bc1_10_bc2_74_bc3_19	38	741
	0427_3_bc1_10_bc2_74_bc3_57	41	869
	0427_3_bc1_10_bc2_74_bc3_91	20	446
	0427_3_bc1_10_bc2_75_bc3_49	27	680
	0427_3_bc1_10_bc2_75_bc3_85	20	433
	0427_3_bc1_10_bc2_75_bc3_93	14	143
	0427_3_bc1_10_bc2_76_bc3_51	330	8824
	0427_3_bc1_10_bc2_76_bc3_56	26	440
	0427_3_bc1_10_bc2_77_bc3_17	31	469
	0427_3_bc1_10_bc2_77_bc3_57	45	763
	0427_3_bc1_10_bc2_77_bc3_96	18	412
	0427_3_bc1_10_bc2_78_bc3_16	29	298
	0427_3_bc1_10_bc2_78_bc3_61	18	327
	0427_3_bc1_10_bc2_78_bc3_92	19	466
	0427_3_bc1_10_bc2_79_bc3_75	40	753
	0427_3_bc1_10_bc2_8_bc3_46	29	602
	0427_3_bc1_10_bc2_8_bc3_58	17	349
	0427_3_bc1_10_bc2_8_bc3_64	29	616
	0427_3_bc1_10_bc2_81_bc3_63	45	785
	0427_3_bc1_10_bc2_82_bc3_39	41	874
	0427_3_bc1_10_bc2_82_bc3_75	51	1030
	0427_3_bc1_10_bc2_83_bc3_21	18	254
	0427_3_bc1_10_bc2_83_bc3_34	15	148
	0427_3_bc1_10_bc2_83_bc3_75	20	425
	0427_3_bc1_10_bc2_83_bc3_78	18	252
	0427_3_bc1_10_bc2_83_bc3_82	35	666
	0427_3_bc1_10_bc2_84_bc3_1	44	854
	0427_3_bc1_10_bc2_84_bc3_42	23	262
	0427_3_bc1_10_bc2_84_bc3_77	272	5637
	0427_3_bc1_10_bc2_84_bc3_90	59	994
	0427_3_bc1_10_bc2_85_bc3_11	23	468
	0427_3_bc1_10_bc2_86_bc3_53	37	450
	0427_3_bc1_10_bc2_86_bc3_83	9	289
	0427_3_bc1_10_bc2_87_bc3_62	198	5476
	0427_3_bc1_10_bc2_88_bc3_95	14	337
	0427_3_bc1_10_bc2_89_bc3_24	17	254
	0427_3_bc1_10_bc2_89_bc3_82	6	327
	0427_3_bc1_10_bc2_89_bc3_93	43	580
	0427_3_bc1_10_bc2_9_bc3_2	24	533
	0427_3_bc1_10_bc2_9_bc3_21	30	516
	0427_3_bc1_10_bc2_9_bc3_39	18	341
	0427_3_bc1_10_bc2_9_bc3_45	33	541
	0427_3_bc1_10_bc2_9_bc3_70	18	322
	0427_3_bc1_10_bc2_9_bc3_90	300	6657
	0427_3_bc1_10_bc2_9_bc3_92	22	216
	0427_3_bc1_10_bc2_90_bc3_24	15	333
	0427_3_bc1_10_bc2_90_bc3_78	47	786
	0427_3_bc1_10_bc2_91_bc3_37	21	288
	0427_3_bc1_10_bc2_91_bc3_4	12	312
	0427_3_bc1_10_bc2_91_bc3_43	25	476
	0427_3_bc1_10_bc2_91_bc3_88	12	12
	0427_3_bc1_10_bc2_92_bc3_49	40	711
	0427_3_bc1_10_bc2_93_bc3_49	23	490
	0427_3_bc1_10_bc2_93_bc3_94	329	8018
	0427_3_bc1_10_bc2_94_bc3_20	20	179
	0427_3_bc1_10_bc2_94_bc3_5	21	393
	0427_3_bc1_10_bc2_95_bc3_74	16	222
	0427_3_bc1_10_bc2_95_bc3_84	34	594
	0427_3_bc1_10_bc2_95_bc3_89	47	1131
	0427_3_bc1_10_bc2_96_bc3_22	47	711
	0427_3_bc1_10_bc2_96_bc3_26	35	284
	0427_3_bc1_10_bc2_96_bc3_44	18	395
	0427_3_bc1_10_bc2_96_bc3_81	18	315
	0427_3_bc1_11_bc2_1_bc3_3	15	193
	0427_3_bc1_11_bc2_11_bc3_20	32	538
	0427_3_bc1_11_bc2_11_bc3_73	24	356
	0427_3_bc1_11_bc2_11_bc3_77	52	880
	0427_3_bc1_11_bc2_11_bc3_91	376	7023
	0427_3_bc1_11_bc2_12_bc3_67	24	337
	0427_3_bc1_11_bc2_12_bc3_82	30	554
	0427_3_bc1_11_bc2_12_bc3_89	19	464
	0427_3_bc1_11_bc2_12_bc3_93	30	527
	0427_3_bc1_11_bc2_14_bc3_4	49	1150
	0427_3_bc1_11_bc2_14_bc3_63	42	727
	0427_3_bc1_11_bc2_14_bc3_78	50	903
	0427_3_bc1_11_bc2_14_bc3_91	17	269
	0427_3_bc1_11_bc2_15_bc3_17	10	344
	0427_3_bc1_11_bc2_16_bc3_12	25	354
	0427_3_bc1_11_bc2_16_bc3_26	16	259
	0427_3_bc1_11_bc2_16_bc3_29	50	633
	0427_3_bc1_11_bc2_16_bc3_4	58	805
	0427_3_bc1_11_bc2_16_bc3_68	64	1349
	0427_3_bc1_11_bc2_16_bc3_86	59	707
	0427_3_bc1_11_bc2_17_bc3_47	253	5488
	0427_3_bc1_11_bc2_17_bc3_7	31	653
	0427_3_bc1_11_bc2_18_bc3_17	47	957
	0427_3_bc1_11_bc2_18_bc3_2	373	9501
	0427_3_bc1_11_bc2_19_bc3_38	27	388
	0427_3_bc1_11_bc2_19_bc3_63	23	644
	0427_3_bc1_11_bc2_19_bc3_96	23	223
	0427_3_bc1_11_bc2_2_bc3_29	19	216
	0427_3_bc1_11_bc2_2_bc3_6	20	135
	0427_3_bc1_11_bc2_2_bc3_81	30	645
	0427_3_bc1_11_bc2_20_bc3_5	26	217
	0427_3_bc1_11_bc2_20_bc3_90	45	811
	0427_3_bc1_11_bc2_21_bc3_83	40	468
	0427_3_bc1_11_bc2_21_bc3_90	21	266
	0427_3_bc1_11_bc2_22_bc3_1	22	489
	0427_3_bc1_11_bc2_22_bc3_79	18	96
	0427_3_bc1_11_bc2_23_bc3_37	58	986
	0427_3_bc1_11_bc2_23_bc3_55	45	743
	0427_3_bc1_11_bc2_23_bc3_77	393	9654
	0427_3_bc1_11_bc2_24_bc3_1	56	697
	0427_3_bc1_11_bc2_24_bc3_19	17	306
	0427_3_bc1_11_bc2_24_bc3_44	23	403
	0427_3_bc1_11_bc2_24_bc3_54	31	477
	0427_3_bc1_11_bc2_24_bc3_6	23	300
	0427_3_bc1_11_bc2_24_bc3_75	26	434
	0427_3_bc1_11_bc2_25_bc3_17	32	488
	0427_3_bc1_11_bc2_25_bc3_84	30	578
	0427_3_bc1_11_bc2_25_bc3_89	27	484
	0427_3_bc1_11_bc2_26_bc3_60	38	476
	0427_3_bc1_11_bc2_27_bc3_48	287	8209
	0427_3_bc1_11_bc2_27_bc3_78	21	431
	0427_3_bc1_11_bc2_27_bc3_81	22	340
	0427_3_bc1_11_bc2_27_bc3_93	16	303
	0427_3_bc1_11_bc2_28_bc3_15	42	763
	0427_3_bc1_11_bc2_28_bc3_43	18	126
	0427_3_bc1_11_bc2_28_bc3_49	42	893
	0427_3_bc1_11_bc2_28_bc3_86	14	347
	0427_3_bc1_11_bc2_29_bc3_35	47	941
	0427_3_bc1_11_bc2_29_bc3_59	69	1364
	0427_3_bc1_11_bc2_3_bc3_11	25	453
	0427_3_bc1_11_bc2_30_bc3_30	77	1575
	0427_3_bc1_11_bc2_30_bc3_74	264	6855
	0427_3_bc1_11_bc2_31_bc3_12	34	673
	0427_3_bc1_11_bc2_31_bc3_8	14	116
	0427_3_bc1_11_bc2_32_bc3_36	26	210
	0427_3_bc1_11_bc2_32_bc3_8	23	147
	0427_3_bc1_11_bc2_32_bc3_80	27	629
	0427_3_bc1_11_bc2_32_bc3_81	16	447
	0427_3_bc1_11_bc2_32_bc3_86	22	204
	0427_3_bc1_11_bc2_32_bc3_89	11	371
	0427_3_bc1_11_bc2_33_bc3_61	26	735
	0427_3_bc1_11_bc2_33_bc3_9	33	698
	0427_3_bc1_11_bc2_34_bc3_18	24	465
	0427_3_bc1_11_bc2_34_bc3_3	22	400
	0427_3_bc1_11_bc2_34_bc3_63	63	1280
	0427_3_bc1_11_bc2_34_bc3_7	17	469
	0427_3_bc1_11_bc2_34_bc3_78	26	366
	0427_3_bc1_11_bc2_34_bc3_9	11	121
	0427_3_bc1_11_bc2_34_bc3_90	25	532
	0427_3_bc1_11_bc2_35_bc3_80	13	231
	0427_3_bc1_11_bc2_37_bc3_18	37	596
	0427_3_bc1_11_bc2_37_bc3_25	28	450
	0427_3_bc1_11_bc2_39_bc3_62	36	427
	0427_3_bc1_11_bc2_39_bc3_89	18	183
	0427_3_bc1_11_bc2_39_bc3_94	28	919
	0427_3_bc1_11_bc2_4_bc3_18	38	459
	0427_3_bc1_11_bc2_4_bc3_94	28	484
	0427_3_bc1_11_bc2_40_bc3_68	20	339
	0427_3_bc1_11_bc2_40_bc3_7	66	1080
	0427_3_bc1_11_bc2_40_bc3_87	20	395
	0427_3_bc1_11_bc2_41_bc3_80	14	128
	0427_3_bc1_11_bc2_43_bc3_74	248	5231
	0427_3_bc1_11_bc2_44_bc3_17	38	653
	0427_3_bc1_11_bc2_44_bc3_18	20	586
	0427_3_bc1_11_bc2_44_bc3_21	34	717
	0427_3_bc1_11_bc2_44_bc3_68	53	897
	0427_3_bc1_11_bc2_45_bc3_26	13	408
	0427_3_bc1_11_bc2_45_bc3_89	9	251
	0427_3_bc1_11_bc2_46_bc3_2	18	248
	0427_3_bc1_11_bc2_46_bc3_62	34	501
	0427_3_bc1_11_bc2_46_bc3_88	18	203
	0427_3_bc1_11_bc2_47_bc3_19	27	355
	0427_3_bc1_11_bc2_47_bc3_3	18	425
	0427_3_bc1_11_bc2_47_bc3_56	36	604
	0427_3_bc1_11_bc2_47_bc3_80	14	324
	0427_3_bc1_11_bc2_48_bc3_86	32	705
	0427_3_bc1_11_bc2_48_bc3_90	41	654
	0427_3_bc1_11_bc2_49_bc3_36	61	1004
	0427_3_bc1_11_bc2_49_bc3_46	20	167
	0427_3_bc1_11_bc2_49_bc3_90	26	303
	0427_3_bc1_11_bc2_50_bc3_72	30	506
	0427_3_bc1_11_bc2_51_bc3_8	33	326
	0427_3_bc1_11_bc2_52_bc3_13	42	482
	0427_3_bc1_11_bc2_52_bc3_16	13	228
	0427_3_bc1_11_bc2_52_bc3_38	17	287
	0427_3_bc1_11_bc2_52_bc3_46	55	1205
	0427_3_bc1_11_bc2_52_bc3_80	40	694
	0427_3_bc1_11_bc2_53_bc3_39	29	455
	0427_3_bc1_11_bc2_53_bc3_52	29	526
	0427_3_bc1_11_bc2_54_bc3_12	188	4588
	0427_3_bc1_11_bc2_54_bc3_2	18	486
	0427_3_bc1_11_bc2_54_bc3_22	184	4260
	0427_3_bc1_11_bc2_54_bc3_46	33	502
	0427_3_bc1_11_bc2_56_bc3_26	47	819
	0427_3_bc1_11_bc2_56_bc3_72	29	714
	0427_3_bc1_11_bc2_56_bc3_93	13	171
	0427_3_bc1_11_bc2_57_bc3_14	253	7511
	0427_3_bc1_11_bc2_57_bc3_35	43	805
	0427_3_bc1_11_bc2_57_bc3_36	53	609
	0427_3_bc1_11_bc2_57_bc3_53	16	292
	0427_3_bc1_11_bc2_57_bc3_67	36	737
	0427_3_bc1_11_bc2_58_bc3_38	13	217
	0427_3_bc1_11_bc2_58_bc3_88	9	9
	0427_3_bc1_11_bc2_58_bc3_92	39	615
	0427_3_bc1_11_bc2_59_bc3_22	47	535
	0427_3_bc1_11_bc2_59_bc3_77	28	157
	0427_3_bc1_11_bc2_59_bc3_94	18	272
	0427_3_bc1_11_bc2_6_bc3_41	53	568
	0427_3_bc1_11_bc2_6_bc3_46	36	559
	0427_3_bc1_11_bc2_6_bc3_68	28	531
	0427_3_bc1_11_bc2_6_bc3_73	49	944
	0427_3_bc1_11_bc2_6_bc3_84	39	890
	0427_3_bc1_11_bc2_6_bc3_86	628	17955
	0427_3_bc1_11_bc2_60_bc3_58	60	1042
	0427_3_bc1_11_bc2_61_bc3_34	46	1222
	0427_3_bc1_11_bc2_62_bc3_26	40	607
	0427_3_bc1_11_bc2_62_bc3_5	42	406
	0427_3_bc1_11_bc2_62_bc3_60	23	482
	0427_3_bc1_11_bc2_63_bc3_25	27	529
	0427_3_bc1_11_bc2_63_bc3_46	12	188
	0427_3_bc1_11_bc2_63_bc3_96	21	418
	0427_3_bc1_11_bc2_64_bc3_79	22	192
	0427_3_bc1_11_bc2_65_bc3_21	14	381
	0427_3_bc1_11_bc2_65_bc3_7	35	681
	0427_3_bc1_11_bc2_66_bc3_13	35	399
	0427_3_bc1_11_bc2_66_bc3_83	18	433
	0427_3_bc1_11_bc2_67_bc3_2	30	441
	0427_3_bc1_11_bc2_67_bc3_43	39	888
	0427_3_bc1_11_bc2_67_bc3_46	37	792
	0427_3_bc1_11_bc2_67_bc3_50	29	512
	0427_3_bc1_11_bc2_67_bc3_60	15	216
	0427_3_bc1_11_bc2_67_bc3_63	56	1163
	0427_3_bc1_11_bc2_67_bc3_86	16	569
	0427_3_bc1_11_bc2_67_bc3_96	39	307
	0427_3_bc1_11_bc2_68_bc3_23	36	477
	0427_3_bc1_11_bc2_69_bc3_5	22	459
	0427_3_bc1_11_bc2_7_bc3_78	22	324
	0427_3_bc1_11_bc2_70_bc3_11	27	490
	0427_3_bc1_11_bc2_71_bc3_51	29	547
	0427_3_bc1_11_bc2_71_bc3_75	7	254
	0427_3_bc1_11_bc2_71_bc3_9	14	317
	0427_3_bc1_11_bc2_71_bc3_95	22	290
	0427_3_bc1_11_bc2_72_bc3_15	28	711
	0427_3_bc1_11_bc2_72_bc3_8	12	185
	0427_3_bc1_11_bc2_73_bc3_41	19	444
	0427_3_bc1_11_bc2_73_bc3_63	71	936
	0427_3_bc1_11_bc2_73_bc3_67	29	512
	0427_3_bc1_11_bc2_73_bc3_90	32	577
	0427_3_bc1_11_bc2_74_bc3_63	32	617
	0427_3_bc1_11_bc2_74_bc3_73	34	751
	0427_3_bc1_11_bc2_75_bc3_17	27	593
	0427_3_bc1_11_bc2_75_bc3_35	32	751
	0427_3_bc1_11_bc2_75_bc3_41	27	420
	0427_3_bc1_11_bc2_75_bc3_67	19	362
	0427_3_bc1_11_bc2_76_bc3_19	24	479
	0427_3_bc1_11_bc2_76_bc3_2	21	422
	0427_3_bc1_11_bc2_76_bc3_24	21	237
	0427_3_bc1_11_bc2_76_bc3_8	24	345
	0427_3_bc1_11_bc2_77_bc3_10	19	325
	0427_3_bc1_11_bc2_77_bc3_12	34	459
	0427_3_bc1_11_bc2_77_bc3_43	18	378
	0427_3_bc1_11_bc2_77_bc3_60	24	119
	0427_3_bc1_11_bc2_77_bc3_77	24	242
	0427_3_bc1_11_bc2_77_bc3_96	20	316
	0427_3_bc1_11_bc2_78_bc3_20	16	305
	0427_3_bc1_11_bc2_79_bc3_29	20	365
	0427_3_bc1_11_bc2_79_bc3_49	18	399
	0427_3_bc1_11_bc2_8_bc3_52	254	7394
	0427_3_bc1_11_bc2_8_bc3_83	23	392
	0427_3_bc1_11_bc2_81_bc3_18	47	710
	0427_3_bc1_11_bc2_81_bc3_23	19	443
	0427_3_bc1_11_bc2_81_bc3_31	56	1229
	0427_3_bc1_11_bc2_81_bc3_73	21	357
	0427_3_bc1_11_bc2_82_bc3_35	22	353
	0427_3_bc1_11_bc2_82_bc3_88	20	656
	0427_3_bc1_11_bc2_82_bc3_92	34	321
	0427_3_bc1_11_bc2_83_bc3_33	13	195
	0427_3_bc1_11_bc2_83_bc3_49	35	682
	0427_3_bc1_11_bc2_83_bc3_72	35	626
	0427_3_bc1_11_bc2_83_bc3_95	38	796
	0427_3_bc1_11_bc2_84_bc3_20	18	319
	0427_3_bc1_11_bc2_84_bc3_49	49	954
	0427_3_bc1_11_bc2_85_bc3_57	10	332
	0427_3_bc1_11_bc2_85_bc3_81	222	3872
	0427_3_bc1_11_bc2_86_bc3_81	212	6504
	0427_3_bc1_11_bc2_87_bc3_50	29	545
	0427_3_bc1_11_bc2_88_bc3_19	21	398
	0427_3_bc1_11_bc2_88_bc3_3	36	463
	0427_3_bc1_11_bc2_88_bc3_53	24	369
	0427_3_bc1_11_bc2_88_bc3_63	36	626
	0427_3_bc1_11_bc2_88_bc3_74	56	751
	0427_3_bc1_11_bc2_88_bc3_76	9	183
	0427_3_bc1_11_bc2_88_bc3_79	22	487
	0427_3_bc1_11_bc2_88_bc3_83	20	481
	0427_3_bc1_11_bc2_89_bc3_2	43	760
	0427_3_bc1_11_bc2_89_bc3_20	45	769
	0427_3_bc1_11_bc2_89_bc3_59	10	131
	0427_3_bc1_11_bc2_9_bc3_10	27	356
	0427_3_bc1_11_bc2_9_bc3_55	29	235
	0427_3_bc1_11_bc2_9_bc3_62	17	350
	0427_3_bc1_11_bc2_9_bc3_68	21	489
	0427_3_bc1_11_bc2_9_bc3_83	10	200
	0427_3_bc1_11_bc2_90_bc3_17	41	614
	0427_3_bc1_11_bc2_90_bc3_32	66	1256
	0427_3_bc1_11_bc2_90_bc3_9	31	676
	0427_3_bc1_11_bc2_91_bc3_2	39	566
	0427_3_bc1_11_bc2_91_bc3_43	22	564
	0427_3_bc1_11_bc2_93_bc3_59	23	391
	0427_3_bc1_11_bc2_95_bc3_86	16	361
	0427_3_bc1_11_bc2_95_bc3_91	18	144
	0427_3_bc1_12_bc2_1_bc3_17	56	845
	0427_3_bc1_12_bc2_1_bc3_28	31	370
	0427_3_bc1_12_bc2_1_bc3_69	56	1471
	0427_3_bc1_12_bc2_10_bc3_61	44	718
	0427_3_bc1_12_bc2_10_bc3_63	21	386
	0427_3_bc1_12_bc2_11_bc3_2	35	497
	0427_3_bc1_12_bc2_11_bc3_30	241	5822
	0427_3_bc1_12_bc2_11_bc3_33	242	6083
	0427_3_bc1_12_bc2_11_bc3_64	75	1197
	0427_3_bc1_12_bc2_12_bc3_19	17	390
	0427_3_bc1_12_bc2_12_bc3_55	340	6717
	0427_3_bc1_12_bc2_13_bc3_50	47	980
	0427_3_bc1_12_bc2_13_bc3_58	55	642
	0427_3_bc1_12_bc2_14_bc3_1	383	9247
	0427_3_bc1_12_bc2_14_bc3_25	45	618
	0427_3_bc1_12_bc2_14_bc3_30	35	715
	0427_3_bc1_12_bc2_14_bc3_44	48	1181
	0427_3_bc1_12_bc2_14_bc3_50	22	212
	0427_3_bc1_12_bc2_14_bc3_59	620	14469
	0427_3_bc1_12_bc2_14_bc3_72	57	1246
	0427_3_bc1_12_bc2_14_bc3_95	23	436
	0427_3_bc1_12_bc2_15_bc3_28	34	560
	0427_3_bc1_12_bc2_15_bc3_42	15	286
	0427_3_bc1_12_bc2_15_bc3_45	35	787
	0427_3_bc1_12_bc2_15_bc3_46	43	453
	0427_3_bc1_12_bc2_15_bc3_49	44	790
	0427_3_bc1_12_bc2_15_bc3_53	44	852
	0427_3_bc1_12_bc2_15_bc3_68	38	616
	0427_3_bc1_12_bc2_16_bc3_18	260	6083
	0427_3_bc1_12_bc2_16_bc3_44	41	762
	0427_3_bc1_12_bc2_16_bc3_85	350	8534
	0427_3_bc1_12_bc2_16_bc3_94	29	460
	0427_3_bc1_12_bc2_17_bc3_37	31	500
	0427_3_bc1_12_bc2_17_bc3_75	36	655
	0427_3_bc1_12_bc2_18_bc3_63	383	6292
	0427_3_bc1_12_bc2_18_bc3_75	43	727
	0427_3_bc1_12_bc2_2_bc3_16	56	757
	0427_3_bc1_12_bc2_2_bc3_20	47	713
	0427_3_bc1_12_bc2_2_bc3_38	26	577
	0427_3_bc1_12_bc2_2_bc3_48	32	552
	0427_3_bc1_12_bc2_20_bc3_25	35	531
	0427_3_bc1_12_bc2_20_bc3_88	65	1052
	0427_3_bc1_12_bc2_21_bc3_25	24	394
	0427_3_bc1_12_bc2_21_bc3_31	13	279
	0427_3_bc1_12_bc2_21_bc3_5	24	263
	0427_3_bc1_12_bc2_21_bc3_58	17	175
	0427_3_bc1_12_bc2_21_bc3_61	59	940
	0427_3_bc1_12_bc2_21_bc3_92	61	1112
	0427_3_bc1_12_bc2_22_bc3_32	309	7088
	0427_3_bc1_12_bc2_22_bc3_4	18	378
	0427_3_bc1_12_bc2_22_bc3_6	25	460
	0427_3_bc1_12_bc2_22_bc3_61	271	6082
	0427_3_bc1_12_bc2_22_bc3_91	33	403
	0427_3_bc1_12_bc2_23_bc3_26	59	828
	0427_3_bc1_12_bc2_23_bc3_30	280	6200
	0427_3_bc1_12_bc2_23_bc3_72	32	414
	0427_3_bc1_12_bc2_24_bc3_32	22	381
	0427_3_bc1_12_bc2_24_bc3_77	48	506
	0427_3_bc1_12_bc2_24_bc3_89	57	950
	0427_3_bc1_12_bc2_25_bc3_29	291	7362
	0427_3_bc1_12_bc2_25_bc3_48	23	168
	0427_3_bc1_12_bc2_26_bc3_43	46	489
	0427_3_bc1_12_bc2_26_bc3_70	51	745
	0427_3_bc1_12_bc2_26_bc3_81	11	216
	0427_3_bc1_12_bc2_27_bc3_13	38	576
	0427_3_bc1_12_bc2_27_bc3_39	15	509
	0427_3_bc1_12_bc2_27_bc3_52	19	442
	0427_3_bc1_12_bc2_27_bc3_59	49	596
	0427_3_bc1_12_bc2_27_bc3_89	28	466
	0427_3_bc1_12_bc2_28_bc3_17	221	3771
	0427_3_bc1_12_bc2_28_bc3_3	287	5396
	0427_3_bc1_12_bc2_28_bc3_41	341	8899
	0427_3_bc1_12_bc2_28_bc3_42	33	415
	0427_3_bc1_12_bc2_28_bc3_46	21	422
	0427_3_bc1_12_bc2_28_bc3_55	32	495
	0427_3_bc1_12_bc2_28_bc3_6	53	755
	0427_3_bc1_12_bc2_28_bc3_61	50	434
	0427_3_bc1_12_bc2_28_bc3_81	33	524
	0427_3_bc1_12_bc2_28_bc3_89	29	627
	0427_3_bc1_12_bc2_29_bc3_16	34	268
	0427_3_bc1_12_bc2_29_bc3_25	15	226
	0427_3_bc1_12_bc2_29_bc3_42	55	740
	0427_3_bc1_12_bc2_29_bc3_50	23	404
	0427_3_bc1_12_bc2_29_bc3_52	34	641
	0427_3_bc1_12_bc2_3_bc3_27	27	462
	0427_3_bc1_12_bc2_3_bc3_94	14	322
	0427_3_bc1_12_bc2_30_bc3_59	50	627
	0427_3_bc1_12_bc2_30_bc3_9	39	510
	0427_3_bc1_12_bc2_30_bc3_96	23	558
	0427_3_bc1_12_bc2_31_bc3_39	58	1076
	0427_3_bc1_12_bc2_31_bc3_41	27	577
	0427_3_bc1_12_bc2_31_bc3_70	26	496
	0427_3_bc1_12_bc2_31_bc3_74	421	10133
	0427_3_bc1_12_bc2_31_bc3_75	29	817
	0427_3_bc1_12_bc2_31_bc3_92	45	608
	0427_3_bc1_12_bc2_32_bc3_4	59	888
	0427_3_bc1_12_bc2_32_bc3_43	23	457
	0427_3_bc1_12_bc2_32_bc3_52	28	473
	0427_3_bc1_12_bc2_32_bc3_55	27	417
	0427_3_bc1_12_bc2_33_bc3_67	263	7391
	0427_3_bc1_12_bc2_34_bc3_1	61	1026
	0427_3_bc1_12_bc2_34_bc3_51	34	558
	0427_3_bc1_12_bc2_34_bc3_89	25	271
	0427_3_bc1_12_bc2_35_bc3_12	55	819
	0427_3_bc1_12_bc2_35_bc3_20	40	745
	0427_3_bc1_12_bc2_35_bc3_37	360	8095
	0427_3_bc1_12_bc2_35_bc3_50	30	481
	0427_3_bc1_12_bc2_35_bc3_79	50	880
	0427_3_bc1_12_bc2_37_bc3_42	49	1307
	0427_3_bc1_12_bc2_37_bc3_74	40	647
	0427_3_bc1_12_bc2_37_bc3_80	41	873
	0427_3_bc1_12_bc2_37_bc3_96	20	24
	0427_3_bc1_12_bc2_39_bc3_29	343	6636
	0427_3_bc1_12_bc2_39_bc3_34	34	316
	0427_3_bc1_12_bc2_39_bc3_61	67	972
	0427_3_bc1_12_bc2_39_bc3_77	251	5823
	0427_3_bc1_12_bc2_39_bc3_85	49	533
	0427_3_bc1_12_bc2_39_bc3_93	43	534
	0427_3_bc1_12_bc2_4_bc3_81	24	384
	0427_3_bc1_12_bc2_4_bc3_83	39	519
	0427_3_bc1_12_bc2_40_bc3_26	36	466
	0427_3_bc1_12_bc2_40_bc3_30	19	300
	0427_3_bc1_12_bc2_40_bc3_54	400	8370
	0427_3_bc1_12_bc2_40_bc3_81	44	958
	0427_3_bc1_12_bc2_41_bc3_76	19	438
	0427_3_bc1_12_bc2_41_bc3_95	25	469
	0427_3_bc1_12_bc2_42_bc3_14	21	264
	0427_3_bc1_12_bc2_43_bc3_20	38	874
	0427_3_bc1_12_bc2_43_bc3_3	20	209
	0427_3_bc1_12_bc2_43_bc3_39	29	572
	0427_3_bc1_12_bc2_43_bc3_58	37	661
	0427_3_bc1_12_bc2_43_bc3_61	24	425
	0427_3_bc1_12_bc2_43_bc3_95	29	579
	0427_3_bc1_12_bc2_44_bc3_1	30	528
	0427_3_bc1_12_bc2_44_bc3_42	45	383
	0427_3_bc1_12_bc2_44_bc3_72	21	426
	0427_3_bc1_12_bc2_45_bc3_18	37	604
	0427_3_bc1_12_bc2_45_bc3_24	422	9748
	0427_3_bc1_12_bc2_45_bc3_5	22	237
	0427_3_bc1_12_bc2_45_bc3_52	27	486
	0427_3_bc1_12_bc2_45_bc3_62	19	293
	0427_3_bc1_12_bc2_45_bc3_77	21	709
	0427_3_bc1_12_bc2_46_bc3_18	39	489
	0427_3_bc1_12_bc2_46_bc3_28	37	735
	0427_3_bc1_12_bc2_46_bc3_53	9	214
	0427_3_bc1_12_bc2_47_bc3_43	42	754
	0427_3_bc1_12_bc2_47_bc3_51	19	696
	0427_3_bc1_12_bc2_47_bc3_55	8	175
	0427_3_bc1_12_bc2_48_bc3_53	369	6784
	0427_3_bc1_12_bc2_48_bc3_85	217	4550
	0427_3_bc1_12_bc2_49_bc3_11	40	782
	0427_3_bc1_12_bc2_49_bc3_42	36	453
	0427_3_bc1_12_bc2_49_bc3_60	22	423
	0427_3_bc1_12_bc2_49_bc3_73	46	596
	0427_3_bc1_12_bc2_5_bc3_36	40	494
	0427_3_bc1_12_bc2_50_bc3_13	63	787
	0427_3_bc1_12_bc2_50_bc3_36	381	8124
	0427_3_bc1_12_bc2_50_bc3_72	38	430
	0427_3_bc1_12_bc2_50_bc3_75	30	639
	0427_3_bc1_12_bc2_51_bc3_10	18	180
	0427_3_bc1_12_bc2_51_bc3_14	18	316
	0427_3_bc1_12_bc2_51_bc3_87	37	490
	0427_3_bc1_12_bc2_52_bc3_16	48	911
	0427_3_bc1_12_bc2_52_bc3_42	11	385
	0427_3_bc1_12_bc2_52_bc3_46	19	224
	0427_3_bc1_12_bc2_53_bc3_12	33	712
	0427_3_bc1_12_bc2_53_bc3_45	17	253
	0427_3_bc1_12_bc2_53_bc3_68	35	558
	0427_3_bc1_12_bc2_53_bc3_70	31	405
	0427_3_bc1_12_bc2_53_bc3_75	44	733
	0427_3_bc1_12_bc2_53_bc3_9	42	982
	0427_3_bc1_12_bc2_54_bc3_12	15	17
	0427_3_bc1_12_bc2_54_bc3_79	46	731
	0427_3_bc1_12_bc2_55_bc3_90	21	284
	0427_3_bc1_12_bc2_56_bc3_15	18	467
	0427_3_bc1_12_bc2_56_bc3_50	9	365
	0427_3_bc1_12_bc2_57_bc3_86	22	460
	0427_3_bc1_12_bc2_57_bc3_92	14	16
	0427_3_bc1_12_bc2_58_bc3_34	39	503
	0427_3_bc1_12_bc2_58_bc3_45	22	614
	0427_3_bc1_12_bc2_59_bc3_14	33	579
	0427_3_bc1_12_bc2_59_bc3_20	254	5944
	0427_3_bc1_12_bc2_59_bc3_29	41	828
	0427_3_bc1_12_bc2_59_bc3_4	25	491
	0427_3_bc1_12_bc2_59_bc3_56	13	181
	0427_3_bc1_12_bc2_59_bc3_71	24	190
	0427_3_bc1_12_bc2_59_bc3_73	715	16356
	0427_3_bc1_12_bc2_59_bc3_95	19	408
	0427_3_bc1_12_bc2_6_bc3_14	62	1302
	0427_3_bc1_12_bc2_6_bc3_3	26	457
	0427_3_bc1_12_bc2_6_bc3_53	15	295
	0427_3_bc1_12_bc2_6_bc3_56	30	422
	0427_3_bc1_12_bc2_6_bc3_74	30	630
	0427_3_bc1_12_bc2_6_bc3_86	26	484
	0427_3_bc1_12_bc2_60_bc3_15	17	176
	0427_3_bc1_12_bc2_60_bc3_38	51	688
	0427_3_bc1_12_bc2_60_bc3_67	17	313
	0427_3_bc1_12_bc2_61_bc3_18	26	559
	0427_3_bc1_12_bc2_61_bc3_38	302	6613
	0427_3_bc1_12_bc2_61_bc3_41	58	719
	0427_3_bc1_12_bc2_61_bc3_65	329	6949
	0427_3_bc1_12_bc2_61_bc3_79	48	474
	0427_3_bc1_12_bc2_62_bc3_33	17	105
	0427_3_bc1_12_bc2_62_bc3_54	25	318
	0427_3_bc1_12_bc2_62_bc3_71	35	442
	0427_3_bc1_12_bc2_62_bc3_96	23	265
	0427_3_bc1_12_bc2_63_bc3_43	56	977
	0427_3_bc1_12_bc2_63_bc3_58	19	413
	0427_3_bc1_12_bc2_63_bc3_65	47	838
	0427_3_bc1_12_bc2_63_bc3_74	18	264
	0427_3_bc1_12_bc2_64_bc3_3	26	419
	0427_3_bc1_12_bc2_65_bc3_38	17	315
	0427_3_bc1_12_bc2_66_bc3_2	21	312
	0427_3_bc1_12_bc2_66_bc3_86	246	4961
	0427_3_bc1_12_bc2_67_bc3_29	19	304
	0427_3_bc1_12_bc2_67_bc3_3	274	5249
	0427_3_bc1_12_bc2_67_bc3_4	35	598
	0427_3_bc1_12_bc2_67_bc3_84	236	5995
	0427_3_bc1_12_bc2_68_bc3_55	24	350
	0427_3_bc1_12_bc2_68_bc3_83	38	681
	0427_3_bc1_12_bc2_69_bc3_12	27	613
	0427_3_bc1_12_bc2_69_bc3_68	48	1314
	0427_3_bc1_12_bc2_7_bc3_20	31	486
	0427_3_bc1_12_bc2_7_bc3_57	17	311
	0427_3_bc1_12_bc2_70_bc3_34	4	11
	0427_3_bc1_12_bc2_70_bc3_58	41	847
	0427_3_bc1_12_bc2_70_bc3_61	26	389
	0427_3_bc1_12_bc2_71_bc3_52	52	683
	0427_3_bc1_12_bc2_71_bc3_54	40	647
	0427_3_bc1_12_bc2_71_bc3_96	47	626
	0427_3_bc1_12_bc2_72_bc3_9	13	308
	0427_3_bc1_12_bc2_74_bc3_31	41	855
	0427_3_bc1_12_bc2_74_bc3_60	225	6017
	0427_3_bc1_12_bc2_74_bc3_80	30	302
	0427_3_bc1_12_bc2_74_bc3_85	36	534
	0427_3_bc1_12_bc2_75_bc3_28	312	4417
	0427_3_bc1_12_bc2_75_bc3_6	76	1055
	0427_3_bc1_12_bc2_75_bc3_66	31	630
	0427_3_bc1_12_bc2_75_bc3_68	343	6669
	0427_3_bc1_12_bc2_76_bc3_10	255	3133
	0427_3_bc1_12_bc2_76_bc3_24	42	442
	0427_3_bc1_12_bc2_76_bc3_5	45	613
	0427_3_bc1_12_bc2_77_bc3_15	48	726
	0427_3_bc1_12_bc2_77_bc3_36	248	6436
	0427_3_bc1_12_bc2_77_bc3_42	22	287
	0427_3_bc1_12_bc2_77_bc3_66	149	6075
	0427_3_bc1_12_bc2_78_bc3_40	43	576
	0427_3_bc1_12_bc2_78_bc3_50	53	889
	0427_3_bc1_12_bc2_78_bc3_7	16	243
	0427_3_bc1_12_bc2_78_bc3_85	26	347
	0427_3_bc1_12_bc2_79_bc3_61	9	207
	0427_3_bc1_12_bc2_8_bc3_31	13	317
	0427_3_bc1_12_bc2_81_bc3_22	36	546
	0427_3_bc1_12_bc2_81_bc3_34	19	21
	0427_3_bc1_12_bc2_81_bc3_56	376	6837
	0427_3_bc1_12_bc2_81_bc3_81	18	360
	0427_3_bc1_12_bc2_81_bc3_83	41	944
	0427_3_bc1_12_bc2_82_bc3_1	36	501
	0427_3_bc1_12_bc2_82_bc3_52	24	608
	0427_3_bc1_12_bc2_82_bc3_72	18	228
	0427_3_bc1_12_bc2_82_bc3_80	253	5021
	0427_3_bc1_12_bc2_83_bc3_20	526	11516
	0427_3_bc1_12_bc2_84_bc3_19	27	773
	0427_3_bc1_12_bc2_84_bc3_22	34	744
	0427_3_bc1_12_bc2_84_bc3_26	53	711
	0427_3_bc1_12_bc2_85_bc3_2	344	6858
	0427_3_bc1_12_bc2_85_bc3_27	66	1415
	0427_3_bc1_12_bc2_85_bc3_28	352	6739
	0427_3_bc1_12_bc2_85_bc3_42	62	853
	0427_3_bc1_12_bc2_85_bc3_52	68	1279
	0427_3_bc1_12_bc2_85_bc3_66	46	864
	0427_3_bc1_12_bc2_85_bc3_89	29	320
	0427_3_bc1_12_bc2_86_bc3_58	50	974
	0427_3_bc1_12_bc2_86_bc3_64	20	370
	0427_3_bc1_12_bc2_86_bc3_7	38	513
	0427_3_bc1_12_bc2_87_bc3_15	35	757
	0427_3_bc1_12_bc2_87_bc3_18	36	483
	0427_3_bc1_12_bc2_87_bc3_34	64	1042
	0427_3_bc1_12_bc2_87_bc3_41	38	263
	0427_3_bc1_12_bc2_87_bc3_90	34	479
	0427_3_bc1_12_bc2_88_bc3_48	26	422
	0427_3_bc1_12_bc2_88_bc3_55	18	213
	0427_3_bc1_12_bc2_88_bc3_68	23	622
	0427_3_bc1_12_bc2_88_bc3_80	26	456
	0427_3_bc1_12_bc2_89_bc3_12	39	540
	0427_3_bc1_12_bc2_89_bc3_16	63	1011
	0427_3_bc1_12_bc2_89_bc3_68	66	907
	0427_3_bc1_12_bc2_9_bc3_10	57	938
	0427_3_bc1_12_bc2_9_bc3_3	19	165
	0427_3_bc1_12_bc2_9_bc3_77	40	637
	0427_3_bc1_12_bc2_90_bc3_2	57	964
	0427_3_bc1_12_bc2_90_bc3_74	53	364
	0427_3_bc1_12_bc2_91_bc3_42	361	10101
	0427_3_bc1_12_bc2_92_bc3_63	26	570
	0427_3_bc1_12_bc2_92_bc3_76	25	490
	0427_3_bc1_12_bc2_92_bc3_79	22	474
	0427_3_bc1_12_bc2_93_bc3_11	63	1422
	0427_3_bc1_12_bc2_93_bc3_29	39	516
	0427_3_bc1_12_bc2_93_bc3_34	214	4277
	0427_3_bc1_12_bc2_93_bc3_41	61	1094
	0427_3_bc1_12_bc2_93_bc3_47	29	622
	0427_3_bc1_12_bc2_93_bc3_6	21	548
	0427_3_bc1_12_bc2_93_bc3_66	61	968
	0427_3_bc1_12_bc2_93_bc3_70	23	600
	0427_3_bc1_12_bc2_93_bc3_94	53	972
	0427_3_bc1_12_bc2_94_bc3_14	20	453
	0427_3_bc1_12_bc2_94_bc3_54	55	621
	0427_3_bc1_12_bc2_95_bc3_18	56	1015
	0427_3_bc1_12_bc2_96_bc3_2	19	203
	0427_3_bc1_12_bc2_96_bc3_23	217	4002
	0427_3_bc1_12_bc2_96_bc3_64	63	1061
	0427_3_bc1_13_bc2_1_bc3_74	25	292
	0427_3_bc1_13_bc2_10_bc3_10	41	441
	0427_3_bc1_13_bc2_10_bc3_73	23	499
	0427_3_bc1_13_bc2_11_bc3_56	227	5426
	0427_3_bc1_13_bc2_12_bc3_58	25	370
	0427_3_bc1_13_bc2_13_bc3_32	37	622
	0427_3_bc1_13_bc2_13_bc3_55	36	433
	0427_3_bc1_13_bc2_14_bc3_29	16	256
	0427_3_bc1_13_bc2_14_bc3_49	22	496
	0427_3_bc1_13_bc2_14_bc3_54	35	555
	0427_3_bc1_13_bc2_15_bc3_11	302	9789
	0427_3_bc1_13_bc2_15_bc3_14	348	7964
	0427_3_bc1_13_bc2_15_bc3_52	12	347
	0427_3_bc1_13_bc2_15_bc3_70	46	803
	0427_3_bc1_13_bc2_15_bc3_91	29	532
	0427_3_bc1_13_bc2_15_bc3_94	15	17
	0427_3_bc1_13_bc2_16_bc3_21	46	673
	0427_3_bc1_13_bc2_17_bc3_5	41	718
	0427_3_bc1_13_bc2_18_bc3_44	27	366
	0427_3_bc1_13_bc2_18_bc3_55	49	741
	0427_3_bc1_13_bc2_19_bc3_25	43	732
	0427_3_bc1_13_bc2_19_bc3_28	29	352
	0427_3_bc1_13_bc2_19_bc3_46	39	727
	0427_3_bc1_13_bc2_19_bc3_79	31	458
	0427_3_bc1_13_bc2_19_bc3_89	24	524
	0427_3_bc1_13_bc2_2_bc3_66	303	5683
	0427_3_bc1_13_bc2_2_bc3_80	30	469
	0427_3_bc1_13_bc2_2_bc3_84	28	339
	0427_3_bc1_13_bc2_20_bc3_18	35	465
	0427_3_bc1_13_bc2_20_bc3_57	42	799
	0427_3_bc1_13_bc2_20_bc3_87	44	671
	0427_3_bc1_13_bc2_22_bc3_66	22	326
	0427_3_bc1_13_bc2_23_bc3_24	20	288
	0427_3_bc1_13_bc2_23_bc3_34	43	499
	0427_3_bc1_13_bc2_23_bc3_43	40	759
	0427_3_bc1_13_bc2_23_bc3_93	49	745
	0427_3_bc1_13_bc2_24_bc3_69	35	539
	0427_3_bc1_13_bc2_24_bc3_84	54	1233
	0427_3_bc1_13_bc2_25_bc3_41	31	554
	0427_3_bc1_13_bc2_25_bc3_46	23	483
	0427_3_bc1_13_bc2_26_bc3_34	23	534
	0427_3_bc1_13_bc2_26_bc3_67	16	179
	0427_3_bc1_13_bc2_26_bc3_80	18	321
	0427_3_bc1_13_bc2_27_bc3_1	43	406
	0427_3_bc1_13_bc2_27_bc3_23	40	728
	0427_3_bc1_13_bc2_27_bc3_58	316	8879
	0427_3_bc1_13_bc2_27_bc3_78	39	573
	0427_3_bc1_13_bc2_28_bc3_32	35	462
	0427_3_bc1_13_bc2_28_bc3_47	22	501
	0427_3_bc1_13_bc2_28_bc3_75	38	713
	0427_3_bc1_13_bc2_29_bc3_63	23	523
	0427_3_bc1_13_bc2_29_bc3_79	27	256
	0427_3_bc1_13_bc2_29_bc3_81	23	675
	0427_3_bc1_13_bc2_29_bc3_96	69	1216
	0427_3_bc1_13_bc2_3_bc3_2	19	481
	0427_3_bc1_13_bc2_3_bc3_42	38	821
	0427_3_bc1_13_bc2_3_bc3_51	33	484
	0427_3_bc1_13_bc2_3_bc3_6	28	401
	0427_3_bc1_13_bc2_3_bc3_61	22	334
	0427_3_bc1_13_bc2_30_bc3_14	15	434
	0427_3_bc1_13_bc2_30_bc3_18	42	1234
	0427_3_bc1_13_bc2_30_bc3_28	49	648
	0427_3_bc1_13_bc2_30_bc3_54	33	482
	0427_3_bc1_13_bc2_31_bc3_11	30	682
	0427_3_bc1_13_bc2_31_bc3_25	16	353
	0427_3_bc1_13_bc2_31_bc3_46	46	1143
	0427_3_bc1_13_bc2_31_bc3_48	18	322
	0427_3_bc1_13_bc2_31_bc3_67	210	4369
	0427_3_bc1_13_bc2_32_bc3_1	743	15398
	0427_3_bc1_13_bc2_32_bc3_2	18	175
	0427_3_bc1_13_bc2_32_bc3_23	21	379
	0427_3_bc1_13_bc2_32_bc3_26	208	6641
	0427_3_bc1_13_bc2_32_bc3_42	450	10687
	0427_3_bc1_13_bc2_32_bc3_45	28	735
	0427_3_bc1_13_bc2_32_bc3_51	44	569
	0427_3_bc1_13_bc2_32_bc3_63	35	339
	0427_3_bc1_13_bc2_33_bc3_20	20	233
	0427_3_bc1_13_bc2_33_bc3_39	14	449
	0427_3_bc1_13_bc2_33_bc3_81	50	1166
	0427_3_bc1_13_bc2_34_bc3_31	35	450
	0427_3_bc1_13_bc2_34_bc3_44	223	6760
	0427_3_bc1_13_bc2_34_bc3_48	27	521
	0427_3_bc1_13_bc2_34_bc3_94	13	298
	0427_3_bc1_13_bc2_35_bc3_38	17	256
	0427_3_bc1_13_bc2_35_bc3_43	32	624
	0427_3_bc1_13_bc2_35_bc3_57	49	518
	0427_3_bc1_13_bc2_35_bc3_92	21	451
	0427_3_bc1_13_bc2_35_bc3_93	20	404
	0427_3_bc1_13_bc2_37_bc3_32	17	32
	0427_3_bc1_13_bc2_37_bc3_68	28	522
	0427_3_bc1_13_bc2_38_bc3_96	18	283
	0427_3_bc1_13_bc2_39_bc3_27	241	4477
	0427_3_bc1_13_bc2_39_bc3_48	61	848
	0427_3_bc1_13_bc2_39_bc3_7	39	613
	0427_3_bc1_13_bc2_4_bc3_2	20	597
	0427_3_bc1_13_bc2_4_bc3_20	49	735
	0427_3_bc1_13_bc2_4_bc3_31	30	472
	0427_3_bc1_13_bc2_4_bc3_60	54	780
	0427_3_bc1_13_bc2_40_bc3_19	43	809
	0427_3_bc1_13_bc2_40_bc3_4	26	416
	0427_3_bc1_13_bc2_40_bc3_48	43	568
	0427_3_bc1_13_bc2_41_bc3_27	26	540
	0427_3_bc1_13_bc2_41_bc3_39	52	722
	0427_3_bc1_13_bc2_42_bc3_42	33	790
	0427_3_bc1_13_bc2_42_bc3_55	44	272
	0427_3_bc1_13_bc2_44_bc3_94	35	630
	0427_3_bc1_13_bc2_45_bc3_35	16	248
	0427_3_bc1_13_bc2_45_bc3_36	19	263
	0427_3_bc1_13_bc2_45_bc3_69	26	504
	0427_3_bc1_13_bc2_45_bc3_7	36	580
	0427_3_bc1_13_bc2_46_bc3_29	10	152
	0427_3_bc1_13_bc2_46_bc3_50	23	591
	0427_3_bc1_13_bc2_46_bc3_55	32	546
	0427_3_bc1_13_bc2_47_bc3_35	45	729
	0427_3_bc1_13_bc2_47_bc3_63	56	887
	0427_3_bc1_13_bc2_47_bc3_95	8	317
	0427_3_bc1_13_bc2_48_bc3_27	38	1002
	0427_3_bc1_13_bc2_48_bc3_61	44	619
	0427_3_bc1_13_bc2_49_bc3_17	62	936
	0427_3_bc1_13_bc2_49_bc3_20	423	10481
	0427_3_bc1_13_bc2_49_bc3_45	23	431
	0427_3_bc1_13_bc2_49_bc3_51	45	973
	0427_3_bc1_13_bc2_49_bc3_65	16	531
	0427_3_bc1_13_bc2_49_bc3_77	341	6133
	0427_3_bc1_13_bc2_49_bc3_78	285	7439
	0427_3_bc1_13_bc2_50_bc3_15	30	456
	0427_3_bc1_13_bc2_50_bc3_54	25	110
	0427_3_bc1_13_bc2_50_bc3_57	26	211
	0427_3_bc1_13_bc2_50_bc3_62	57	890
	0427_3_bc1_13_bc2_51_bc3_31	13	207
	0427_3_bc1_13_bc2_51_bc3_40	29	962
	0427_3_bc1_13_bc2_51_bc3_47	14	289
	0427_3_bc1_13_bc2_51_bc3_59	24	632
	0427_3_bc1_13_bc2_51_bc3_83	35	718
	0427_3_bc1_13_bc2_51_bc3_88	17	311
	0427_3_bc1_13_bc2_52_bc3_56	41	949
	0427_3_bc1_13_bc2_52_bc3_78	33	408
	0427_3_bc1_13_bc2_53_bc3_19	81	1351
	0427_3_bc1_13_bc2_53_bc3_21	27	318
	0427_3_bc1_13_bc2_53_bc3_77	22	169
	0427_3_bc1_13_bc2_54_bc3_18	281	7785
	0427_3_bc1_13_bc2_54_bc3_27	48	661
	0427_3_bc1_13_bc2_54_bc3_76	35	649
	0427_3_bc1_13_bc2_56_bc3_2	6	197
	0427_3_bc1_13_bc2_56_bc3_27	30	660
	0427_3_bc1_13_bc2_56_bc3_34	30	430
	0427_3_bc1_13_bc2_56_bc3_36	22	365
	0427_3_bc1_13_bc2_56_bc3_63	39	663
	0427_3_bc1_13_bc2_58_bc3_12	61	762
	0427_3_bc1_13_bc2_58_bc3_31	32	400
	0427_3_bc1_13_bc2_58_bc3_44	14	176
	0427_3_bc1_13_bc2_58_bc3_55	38	859
	0427_3_bc1_13_bc2_58_bc3_76	276	7790
	0427_3_bc1_13_bc2_58_bc3_80	46	591
	0427_3_bc1_13_bc2_58_bc3_84	22	607
	0427_3_bc1_13_bc2_6_bc3_48	40	791
	0427_3_bc1_13_bc2_6_bc3_83	17	462
	0427_3_bc1_13_bc2_6_bc3_91	51	682
	0427_3_bc1_13_bc2_60_bc3_40	63	1204
	0427_3_bc1_13_bc2_60_bc3_6	50	701
	0427_3_bc1_13_bc2_60_bc3_67	53	749
	0427_3_bc1_13_bc2_60_bc3_8	68	825
	0427_3_bc1_13_bc2_60_bc3_92	55	715
	0427_3_bc1_13_bc2_61_bc3_92	235	4592
	0427_3_bc1_13_bc2_62_bc3_39	19	200
	0427_3_bc1_13_bc2_62_bc3_50	36	803
	0427_3_bc1_13_bc2_62_bc3_72	37	746
	0427_3_bc1_13_bc2_63_bc3_96	31	573
	0427_3_bc1_13_bc2_64_bc3_54	62	979
	0427_3_bc1_13_bc2_64_bc3_61	20	315
	0427_3_bc1_13_bc2_64_bc3_75	42	892
	0427_3_bc1_13_bc2_65_bc3_17	26	614
	0427_3_bc1_13_bc2_65_bc3_27	32	572
	0427_3_bc1_13_bc2_65_bc3_59	61	1299
	0427_3_bc1_13_bc2_66_bc3_60	63	873
	0427_3_bc1_13_bc2_67_bc3_53	67	1212
	0427_3_bc1_13_bc2_67_bc3_56	27	573
	0427_3_bc1_13_bc2_67_bc3_58	287	6402
	0427_3_bc1_13_bc2_67_bc3_70	33	276
	0427_3_bc1_13_bc2_67_bc3_93	39	418
	0427_3_bc1_13_bc2_68_bc3_18	34	746
	0427_3_bc1_13_bc2_68_bc3_54	43	661
	0427_3_bc1_13_bc2_69_bc3_87	56	905
	0427_3_bc1_13_bc2_7_bc3_20	40	441
	0427_3_bc1_13_bc2_7_bc3_65	35	631
	0427_3_bc1_13_bc2_70_bc3_42	331	6277
	0427_3_bc1_13_bc2_70_bc3_5	31	663
	0427_3_bc1_13_bc2_71_bc3_78	35	407
	0427_3_bc1_13_bc2_71_bc3_8	20	417
	0427_3_bc1_13_bc2_71_bc3_87	64	1418
	0427_3_bc1_13_bc2_72_bc3_60	17	416
	0427_3_bc1_13_bc2_73_bc3_21	22	350
	0427_3_bc1_13_bc2_73_bc3_27	22	374
	0427_3_bc1_13_bc2_73_bc3_31	13	291
	0427_3_bc1_13_bc2_73_bc3_41	37	645
	0427_3_bc1_13_bc2_73_bc3_53	14	362
	0427_3_bc1_13_bc2_73_bc3_84	27	715
	0427_3_bc1_13_bc2_73_bc3_85	36	639
	0427_3_bc1_13_bc2_74_bc3_1	16	278
	0427_3_bc1_13_bc2_74_bc3_18	210	4380
	0427_3_bc1_13_bc2_74_bc3_37	19	522
	0427_3_bc1_13_bc2_75_bc3_11	33	535
	0427_3_bc1_13_bc2_75_bc3_19	212	5324
	0427_3_bc1_13_bc2_75_bc3_2	246	5064
	0427_3_bc1_13_bc2_75_bc3_27	42	848
	0427_3_bc1_13_bc2_75_bc3_5	34	451
	0427_3_bc1_13_bc2_75_bc3_59	219	5691
	0427_3_bc1_13_bc2_75_bc3_63	251	6205
	0427_3_bc1_13_bc2_75_bc3_72	40	882
	0427_3_bc1_13_bc2_76_bc3_52	51	1000
	0427_3_bc1_13_bc2_76_bc3_66	314	7882
	0427_3_bc1_13_bc2_76_bc3_87	21	454
	0427_3_bc1_13_bc2_77_bc3_10	22	463
	0427_3_bc1_13_bc2_77_bc3_36	56	881
	0427_3_bc1_13_bc2_77_bc3_40	228	5363
	0427_3_bc1_13_bc2_77_bc3_43	30	673
	0427_3_bc1_13_bc2_77_bc3_48	66	963
	0427_3_bc1_13_bc2_77_bc3_52	25	621
	0427_3_bc1_13_bc2_77_bc3_90	23	439
	0427_3_bc1_13_bc2_77_bc3_92	28	408
	0427_3_bc1_13_bc2_78_bc3_9	18	443
	0427_3_bc1_13_bc2_79_bc3_49	19	362
	0427_3_bc1_13_bc2_79_bc3_62	25	533
	0427_3_bc1_13_bc2_8_bc3_26	304	7099
	0427_3_bc1_13_bc2_8_bc3_45	21	525
	0427_3_bc1_13_bc2_80_bc3_71	30	239
	0427_3_bc1_13_bc2_80_bc3_81	59	1229
	0427_3_bc1_13_bc2_80_bc3_9	30	495
	0427_3_bc1_13_bc2_81_bc3_12	21	363
	0427_3_bc1_13_bc2_81_bc3_6	16	387
	0427_3_bc1_13_bc2_81_bc3_72	52	691
	0427_3_bc1_13_bc2_82_bc3_72	52	1067
	0427_3_bc1_13_bc2_82_bc3_83	48	636
	0427_3_bc1_13_bc2_82_bc3_84	325	6986
	0427_3_bc1_13_bc2_83_bc3_12	33	408
	0427_3_bc1_13_bc2_83_bc3_59	35	312
	0427_3_bc1_13_bc2_84_bc3_17	51	815
	0427_3_bc1_13_bc2_84_bc3_51	260	5480
	0427_3_bc1_13_bc2_84_bc3_56	49	740
	0427_3_bc1_13_bc2_84_bc3_8	40	880
	0427_3_bc1_13_bc2_85_bc3_10	66	965
	0427_3_bc1_13_bc2_85_bc3_50	10	216
	0427_3_bc1_13_bc2_85_bc3_6	36	403
	0427_3_bc1_13_bc2_85_bc3_64	227	4853
	0427_3_bc1_13_bc2_85_bc3_81	29	658
	0427_3_bc1_13_bc2_86_bc3_65	14	244
	0427_3_bc1_13_bc2_87_bc3_2	44	625
	0427_3_bc1_13_bc2_87_bc3_20	46	976
	0427_3_bc1_13_bc2_87_bc3_59	42	790
	0427_3_bc1_13_bc2_87_bc3_66	19	336
	0427_3_bc1_13_bc2_87_bc3_84	55	1011
	0427_3_bc1_13_bc2_88_bc3_15	10	317
	0427_3_bc1_13_bc2_88_bc3_89	275	6654
	0427_3_bc1_13_bc2_89_bc3_32	30	252
	0427_3_bc1_13_bc2_89_bc3_42	13	165
	0427_3_bc1_13_bc2_89_bc3_54	45	658
	0427_3_bc1_13_bc2_89_bc3_8	25	311
	0427_3_bc1_13_bc2_9_bc3_36	17	269
	0427_3_bc1_13_bc2_9_bc3_67	19	299
	0427_3_bc1_13_bc2_90_bc3_47	24	351
	0427_3_bc1_13_bc2_90_bc3_48	36	468
	0427_3_bc1_13_bc2_90_bc3_60	38	601
	0427_3_bc1_13_bc2_90_bc3_90	295	6734
	0427_3_bc1_13_bc2_91_bc3_44	30	687
	0427_3_bc1_13_bc2_91_bc3_53	25	369
	0427_3_bc1_13_bc2_91_bc3_55	33	649
	0427_3_bc1_13_bc2_91_bc3_78	48	1150
	0427_3_bc1_13_bc2_93_bc3_31	42	516
	0427_3_bc1_13_bc2_93_bc3_41	47	555
	0427_3_bc1_13_bc2_94_bc3_36	18	310
	0427_3_bc1_13_bc2_94_bc3_44	16	287
	0427_3_bc1_13_bc2_94_bc3_47	30	376
	0427_3_bc1_13_bc2_94_bc3_79	19	481
	0427_3_bc1_13_bc2_94_bc3_83	63	1055
	0427_3_bc1_13_bc2_95_bc3_13	279	4919
	0427_3_bc1_13_bc2_95_bc3_29	336	6818
	0427_3_bc1_13_bc2_96_bc3_35	32	630
	0427_3_bc1_13_bc2_96_bc3_60	34	613
	0427_3_bc1_14_bc2_10_bc3_10	35	488
	0427_3_bc1_14_bc2_10_bc3_18	32	608
	0427_3_bc1_14_bc2_10_bc3_58	25	436
	0427_3_bc1_14_bc2_10_bc3_86	8	327
	0427_3_bc1_14_bc2_11_bc3_5	32	523
	0427_3_bc1_14_bc2_12_bc3_23	57	785
	0427_3_bc1_14_bc2_12_bc3_65	347	5081
	0427_3_bc1_14_bc2_12_bc3_66	81	1418
	0427_3_bc1_14_bc2_12_bc3_79	52	428
	0427_3_bc1_14_bc2_12_bc3_88	37	465
	0427_3_bc1_14_bc2_12_bc3_95	37	690
	0427_3_bc1_14_bc2_13_bc3_10	40	687
	0427_3_bc1_14_bc2_13_bc3_12	331	4988
	0427_3_bc1_14_bc2_13_bc3_17	28	347
	0427_3_bc1_14_bc2_13_bc3_8	283	4543
	0427_3_bc1_14_bc2_14_bc3_18	232	4702
	0427_3_bc1_14_bc2_14_bc3_71	59	780
	0427_3_bc1_14_bc2_15_bc3_12	292	5493
	0427_3_bc1_14_bc2_15_bc3_20	36	274
	0427_3_bc1_14_bc2_15_bc3_25	22	124
	0427_3_bc1_14_bc2_15_bc3_68	61	1002
	0427_3_bc1_14_bc2_16_bc3_12	24	410
	0427_3_bc1_14_bc2_16_bc3_43	43	540
	0427_3_bc1_14_bc2_16_bc3_50	29	481
	0427_3_bc1_14_bc2_16_bc3_58	36	658
	0427_3_bc1_14_bc2_16_bc3_88	44	748
	0427_3_bc1_14_bc2_16_bc3_91	183	3687
	0427_3_bc1_14_bc2_17_bc3_44	446	7850
	0427_3_bc1_14_bc2_17_bc3_85	36	849
	0427_3_bc1_14_bc2_18_bc3_27	69	1078
	0427_3_bc1_14_bc2_18_bc3_36	49	513
	0427_3_bc1_14_bc2_18_bc3_39	248	4163
	0427_3_bc1_14_bc2_18_bc3_45	186	4962
	0427_3_bc1_14_bc2_18_bc3_54	57	923
	0427_3_bc1_14_bc2_18_bc3_68	58	867
	0427_3_bc1_14_bc2_19_bc3_12	48	752
	0427_3_bc1_14_bc2_19_bc3_26	24	429
	0427_3_bc1_14_bc2_19_bc3_37	22	308
	0427_3_bc1_14_bc2_19_bc3_47	516	10440
	0427_3_bc1_14_bc2_19_bc3_75	25	27
	0427_3_bc1_14_bc2_19_bc3_8	53	818
	0427_3_bc1_14_bc2_2_bc3_31	215	4471
	0427_3_bc1_14_bc2_2_bc3_58	21	289
	0427_3_bc1_14_bc2_2_bc3_60	39	493
	0427_3_bc1_14_bc2_2_bc3_82	182	3496
	0427_3_bc1_14_bc2_20_bc3_32	24	493
	0427_3_bc1_14_bc2_20_bc3_34	1905	36017
	0427_3_bc1_14_bc2_20_bc3_49	30	278
	0427_3_bc1_14_bc2_21_bc3_20	20	176
	0427_3_bc1_14_bc2_21_bc3_31	280	6591
	0427_3_bc1_14_bc2_21_bc3_37	638	11406
	0427_3_bc1_14_bc2_21_bc3_4	29	508
	0427_3_bc1_14_bc2_22_bc3_57	27	400
	0427_3_bc1_14_bc2_23_bc3_18	13	17
	0427_3_bc1_14_bc2_23_bc3_3	28	461
	0427_3_bc1_14_bc2_23_bc3_30	26	249
	0427_3_bc1_14_bc2_23_bc3_82	14	377
	0427_3_bc1_14_bc2_23_bc3_96	15	142
	0427_3_bc1_14_bc2_24_bc3_18	48	477
	0427_3_bc1_14_bc2_24_bc3_47	201	5424
	0427_3_bc1_14_bc2_25_bc3_5	38	376
	0427_3_bc1_14_bc2_25_bc3_68	44	787
	0427_3_bc1_14_bc2_25_bc3_86	54	885
	0427_3_bc1_14_bc2_25_bc3_89	53	805
	0427_3_bc1_14_bc2_28_bc3_15	17	429
	0427_3_bc1_14_bc2_28_bc3_57	32	444
	0427_3_bc1_14_bc2_29_bc3_16	36	325
	0427_3_bc1_14_bc2_29_bc3_37	42	694
	0427_3_bc1_14_bc2_29_bc3_41	287	4820
	0427_3_bc1_14_bc2_29_bc3_52	15	175
	0427_3_bc1_14_bc2_29_bc3_58	47	250
	0427_3_bc1_14_bc2_29_bc3_62	27	665
	0427_3_bc1_14_bc2_3_bc3_42	20	547
	0427_3_bc1_14_bc2_3_bc3_46	29	556
	0427_3_bc1_14_bc2_3_bc3_71	11	349
	0427_3_bc1_14_bc2_3_bc3_72	18	403
	0427_3_bc1_14_bc2_30_bc3_15	39	594
	0427_3_bc1_14_bc2_30_bc3_24	17	213
	0427_3_bc1_14_bc2_30_bc3_44	351	3628
	0427_3_bc1_14_bc2_30_bc3_65	41	629
	0427_3_bc1_14_bc2_30_bc3_66	651	14546
	0427_3_bc1_14_bc2_30_bc3_8	35	444
	0427_3_bc1_14_bc2_31_bc3_18	10	10
	0427_3_bc1_14_bc2_31_bc3_21	36	623
	0427_3_bc1_14_bc2_31_bc3_22	430	10474
	0427_3_bc1_14_bc2_31_bc3_37	35	326
	0427_3_bc1_14_bc2_31_bc3_47	33	434
	0427_3_bc1_14_bc2_31_bc3_62	271	3696
	0427_3_bc1_14_bc2_31_bc3_64	47	642
	0427_3_bc1_14_bc2_31_bc3_73	31	282
	0427_3_bc1_14_bc2_32_bc3_2	26	394
	0427_3_bc1_14_bc2_32_bc3_23	27	404
	0427_3_bc1_14_bc2_32_bc3_37	223	4358
	0427_3_bc1_14_bc2_32_bc3_41	266	5683
	0427_3_bc1_14_bc2_32_bc3_53	20	43
	0427_3_bc1_14_bc2_32_bc3_65	48	985
	0427_3_bc1_14_bc2_32_bc3_7	31	189
	0427_3_bc1_14_bc2_32_bc3_85	44	711
	0427_3_bc1_14_bc2_32_bc3_87	30	605
	0427_3_bc1_14_bc2_33_bc3_10	36	431
	0427_3_bc1_14_bc2_33_bc3_32	33	323
	0427_3_bc1_14_bc2_33_bc3_45	338	6189
	0427_3_bc1_14_bc2_33_bc3_48	22	407
	0427_3_bc1_14_bc2_33_bc3_56	331	6568
	0427_3_bc1_14_bc2_34_bc3_14	61	738
	0427_3_bc1_14_bc2_34_bc3_38	56	1051
	0427_3_bc1_14_bc2_34_bc3_39	218	3913
	0427_3_bc1_14_bc2_34_bc3_45	248	5316
	0427_3_bc1_14_bc2_34_bc3_78	181	4249
	0427_3_bc1_14_bc2_35_bc3_20	41	755
	0427_3_bc1_14_bc2_35_bc3_29	14	306
	0427_3_bc1_14_bc2_35_bc3_56	19	499
	0427_3_bc1_14_bc2_35_bc3_86	298	5379
	0427_3_bc1_14_bc2_36_bc3_39	34	498
	0427_3_bc1_14_bc2_37_bc3_12	26	622
	0427_3_bc1_14_bc2_37_bc3_23	16	284
	0427_3_bc1_14_bc2_37_bc3_47	257	3760
	0427_3_bc1_14_bc2_37_bc3_60	281	4929
	0427_3_bc1_14_bc2_37_bc3_65	55	628
	0427_3_bc1_14_bc2_37_bc3_74	289	4549
	0427_3_bc1_14_bc2_37_bc3_84	219	5469
	0427_3_bc1_14_bc2_39_bc3_42	334	5958
	0427_3_bc1_14_bc2_39_bc3_43	37	500
	0427_3_bc1_14_bc2_39_bc3_48	40	487
	0427_3_bc1_14_bc2_39_bc3_52	22	220
	0427_3_bc1_14_bc2_39_bc3_6	29	581
	0427_3_bc1_14_bc2_39_bc3_64	47	726
	0427_3_bc1_14_bc2_39_bc3_72	14	228
	0427_3_bc1_14_bc2_39_bc3_85	62	770
	0427_3_bc1_14_bc2_4_bc3_20	41	692
	0427_3_bc1_14_bc2_4_bc3_28	39	280
	0427_3_bc1_14_bc2_4_bc3_29	23	338
	0427_3_bc1_14_bc2_4_bc3_35	217	4662
	0427_3_bc1_14_bc2_4_bc3_50	31	284
	0427_3_bc1_14_bc2_4_bc3_55	249	5180
	0427_3_bc1_14_bc2_4_bc3_70	241	1871
	0427_3_bc1_14_bc2_4_bc3_91	44	420
	0427_3_bc1_14_bc2_40_bc3_47	23	346
	0427_3_bc1_14_bc2_40_bc3_54	33	504
	0427_3_bc1_14_bc2_40_bc3_84	358	6430
	0427_3_bc1_14_bc2_40_bc3_93	18	512
	0427_3_bc1_14_bc2_41_bc3_14	22	309
	0427_3_bc1_14_bc2_42_bc3_18	31	421
	0427_3_bc1_14_bc2_42_bc3_36	37	452
	0427_3_bc1_14_bc2_42_bc3_95	17	263
	0427_3_bc1_14_bc2_43_bc3_2	33	523
	0427_3_bc1_14_bc2_43_bc3_72	18	323
	0427_3_bc1_14_bc2_43_bc3_82	28	266
	0427_3_bc1_14_bc2_43_bc3_88	33	460
	0427_3_bc1_14_bc2_44_bc3_39	27	414
	0427_3_bc1_14_bc2_44_bc3_88	43	753
	0427_3_bc1_14_bc2_45_bc3_17	25	480
	0427_3_bc1_14_bc2_45_bc3_18	45	690
	0427_3_bc1_14_bc2_45_bc3_26	18	213
	0427_3_bc1_14_bc2_45_bc3_5	27	332
	0427_3_bc1_14_bc2_45_bc3_52	15	47
	0427_3_bc1_14_bc2_45_bc3_69	32	880
	0427_3_bc1_14_bc2_45_bc3_91	27	261
	0427_3_bc1_14_bc2_46_bc3_75	25	266
	0427_3_bc1_14_bc2_46_bc3_86	25	524
	0427_3_bc1_14_bc2_47_bc3_52	25	643
	0427_3_bc1_14_bc2_47_bc3_71	37	347
	0427_3_bc1_14_bc2_48_bc3_12	287	7270
	0427_3_bc1_14_bc2_48_bc3_25	239	4099
	0427_3_bc1_14_bc2_48_bc3_32	21	288
	0427_3_bc1_14_bc2_48_bc3_43	22	214
	0427_3_bc1_14_bc2_48_bc3_47	49	969
	0427_3_bc1_14_bc2_49_bc3_15	50	537
	0427_3_bc1_14_bc2_49_bc3_69	19	438
	0427_3_bc1_14_bc2_49_bc3_80	49	782
	0427_3_bc1_14_bc2_5_bc3_20	13	318
	0427_3_bc1_14_bc2_50_bc3_38	16	194
	0427_3_bc1_14_bc2_50_bc3_50	26	249
	0427_3_bc1_14_bc2_50_bc3_73	19	374
	0427_3_bc1_14_bc2_51_bc3_80	24	358
	0427_3_bc1_14_bc2_52_bc3_18	39	704
	0427_3_bc1_14_bc2_52_bc3_23	297	4476
	0427_3_bc1_14_bc2_52_bc3_80	1076	18719
	0427_3_bc1_14_bc2_52_bc3_85	56	965
	0427_3_bc1_14_bc2_52_bc3_96	973	17236
	0427_3_bc1_14_bc2_53_bc3_18	19	315
	0427_3_bc1_14_bc2_53_bc3_64	45	794
	0427_3_bc1_14_bc2_53_bc3_67	27	245
	0427_3_bc1_14_bc2_54_bc3_22	60	576
	0427_3_bc1_14_bc2_54_bc3_96	333	4955
	0427_3_bc1_14_bc2_55_bc3_27	36	877
	0427_3_bc1_14_bc2_56_bc3_10	20	223
	0427_3_bc1_14_bc2_56_bc3_45	27	502
	0427_3_bc1_14_bc2_56_bc3_57	17	169
	0427_3_bc1_14_bc2_57_bc3_39	312	6718
	0427_3_bc1_14_bc2_57_bc3_46	29	469
	0427_3_bc1_14_bc2_57_bc3_54	33	267
	0427_3_bc1_14_bc2_57_bc3_73	65	1256
	0427_3_bc1_14_bc2_58_bc3_84	12	248
	0427_3_bc1_14_bc2_59_bc3_39	20	475
	0427_3_bc1_14_bc2_6_bc3_12	71	722
	0427_3_bc1_14_bc2_6_bc3_4	53	292
	0427_3_bc1_14_bc2_6_bc3_48	28	318
	0427_3_bc1_14_bc2_6_bc3_7	358	6906
	0427_3_bc1_14_bc2_60_bc3_21	42	691
	0427_3_bc1_14_bc2_60_bc3_41	412	6330
	0427_3_bc1_14_bc2_60_bc3_46	264	3462
	0427_3_bc1_14_bc2_60_bc3_52	27	482
	0427_3_bc1_14_bc2_60_bc3_78	331	4807
	0427_3_bc1_14_bc2_61_bc3_2	61	1148
	0427_3_bc1_14_bc2_61_bc3_58	209	2348
	0427_3_bc1_14_bc2_61_bc3_9	181	1732
	0427_3_bc1_14_bc2_62_bc3_14	22	455
	0427_3_bc1_14_bc2_62_bc3_17	824	14534
	0427_3_bc1_14_bc2_62_bc3_22	16	387
	0427_3_bc1_14_bc2_62_bc3_3	12	81
	0427_3_bc1_14_bc2_62_bc3_53	35	354
	0427_3_bc1_14_bc2_62_bc3_65	64	1192
	0427_3_bc1_14_bc2_62_bc3_80	27	696
	0427_3_bc1_14_bc2_63_bc3_22	23	206
	0427_3_bc1_14_bc2_63_bc3_55	61	954
	0427_3_bc1_14_bc2_63_bc3_76	26	359
	0427_3_bc1_14_bc2_63_bc3_77	22	395
	0427_3_bc1_14_bc2_63_bc3_95	13	308
	0427_3_bc1_14_bc2_64_bc3_6	42	527
	0427_3_bc1_14_bc2_64_bc3_66	25	312
	0427_3_bc1_14_bc2_64_bc3_88	6	9
	0427_3_bc1_14_bc2_64_bc3_95	23	532
	0427_3_bc1_14_bc2_65_bc3_11	45	699
	0427_3_bc1_14_bc2_65_bc3_8	19	428
	0427_3_bc1_14_bc2_66_bc3_15	33	431
	0427_3_bc1_14_bc2_66_bc3_26	609	7442
	0427_3_bc1_14_bc2_67_bc3_22	281	4628
	0427_3_bc1_14_bc2_67_bc3_41	443	7189
	0427_3_bc1_14_bc2_67_bc3_51	437	5771
	0427_3_bc1_14_bc2_67_bc3_56	45	835
	0427_3_bc1_14_bc2_67_bc3_68	41	695
	0427_3_bc1_14_bc2_67_bc3_78	280	4440
	0427_3_bc1_14_bc2_67_bc3_85	28	414
	0427_3_bc1_14_bc2_69_bc3_26	23	255
	0427_3_bc1_14_bc2_69_bc3_3	46	229
	0427_3_bc1_14_bc2_69_bc3_68	46	620
	0427_3_bc1_14_bc2_7_bc3_48	14	401
	0427_3_bc1_14_bc2_70_bc3_34	38	346
	0427_3_bc1_14_bc2_70_bc3_37	31	182
	0427_3_bc1_14_bc2_71_bc3_25	280	4389
	0427_3_bc1_14_bc2_71_bc3_30	36	321
	0427_3_bc1_14_bc2_71_bc3_39	281	3896
	0427_3_bc1_14_bc2_71_bc3_72	36	177
	0427_3_bc1_14_bc2_71_bc3_89	27	169
	0427_3_bc1_14_bc2_72_bc3_51	25	273
	0427_3_bc1_14_bc2_72_bc3_74	17	322
	0427_3_bc1_14_bc2_72_bc3_81	17	427
	0427_3_bc1_14_bc2_73_bc3_51	61	600
	0427_3_bc1_14_bc2_73_bc3_80	39	411
	0427_3_bc1_14_bc2_74_bc3_22	57	936
	0427_3_bc1_14_bc2_74_bc3_84	62	701
	0427_3_bc1_14_bc2_75_bc3_2	61	1017
	0427_3_bc1_14_bc2_75_bc3_32	231	2652
	0427_3_bc1_14_bc2_75_bc3_34	32	540
	0427_3_bc1_14_bc2_75_bc3_47	17	232
	0427_3_bc1_14_bc2_75_bc3_66	24	527
	0427_3_bc1_14_bc2_75_bc3_96	30	209
	0427_3_bc1_14_bc2_76_bc3_35	34	250
	0427_3_bc1_14_bc2_76_bc3_43	31	376
	0427_3_bc1_14_bc2_76_bc3_7	42	431
	0427_3_bc1_14_bc2_76_bc3_72	21	396
	0427_3_bc1_14_bc2_77_bc3_18	257	4639
	0427_3_bc1_14_bc2_77_bc3_54	204	2490
	0427_3_bc1_14_bc2_77_bc3_83	36	309
	0427_3_bc1_14_bc2_77_bc3_95	316	4640
	0427_3_bc1_14_bc2_78_bc3_49	17	340
	0427_3_bc1_14_bc2_78_bc3_88	11	315
	0427_3_bc1_14_bc2_79_bc3_25	39	613
	0427_3_bc1_14_bc2_8_bc3_38	50	656
	0427_3_bc1_14_bc2_80_bc3_63	32	724
	0427_3_bc1_14_bc2_81_bc3_19	351	5000
	0427_3_bc1_14_bc2_81_bc3_28	568	10473
	0427_3_bc1_14_bc2_81_bc3_50	323	3410
	0427_3_bc1_14_bc2_81_bc3_55	401	5485
	0427_3_bc1_14_bc2_81_bc3_7	22	188
	0427_3_bc1_14_bc2_81_bc3_8	30	451
	0427_3_bc1_14_bc2_82_bc3_37	61	1232
	0427_3_bc1_14_bc2_82_bc3_60	228	4013
	0427_3_bc1_14_bc2_82_bc3_82	396	9742
	0427_3_bc1_14_bc2_83_bc3_22	27	121
	0427_3_bc1_14_bc2_83_bc3_25	33	331
	0427_3_bc1_14_bc2_83_bc3_39	21	256
	0427_3_bc1_14_bc2_83_bc3_43	573	9483
	0427_3_bc1_14_bc2_83_bc3_79	18	357
	0427_3_bc1_14_bc2_83_bc3_83	205	4762
	0427_3_bc1_14_bc2_83_bc3_90	319	5940
	0427_3_bc1_14_bc2_83_bc3_96	28	363
	0427_3_bc1_14_bc2_84_bc3_16	257	4365
	0427_3_bc1_14_bc2_84_bc3_72	230	4245
	0427_3_bc1_14_bc2_85_bc3_23	28	604
	0427_3_bc1_14_bc2_86_bc3_18	42	557
	0427_3_bc1_14_bc2_86_bc3_72	291	5705
	0427_3_bc1_14_bc2_86_bc3_81	32	520
	0427_3_bc1_14_bc2_86_bc3_83	20	410
	0427_3_bc1_14_bc2_87_bc3_1	467	7836
	0427_3_bc1_14_bc2_87_bc3_15	17	189
	0427_3_bc1_14_bc2_87_bc3_21	31	463
	0427_3_bc1_14_bc2_87_bc3_50	63	855
	0427_3_bc1_14_bc2_87_bc3_67	27	364
	0427_3_bc1_14_bc2_87_bc3_69	18	290
	0427_3_bc1_14_bc2_87_bc3_72	42	751
	0427_3_bc1_14_bc2_87_bc3_78	27	399
	0427_3_bc1_14_bc2_88_bc3_10	43	603
	0427_3_bc1_14_bc2_88_bc3_21	264	2687
	0427_3_bc1_14_bc2_88_bc3_25	28	432
	0427_3_bc1_14_bc2_88_bc3_43	241	4457
	0427_3_bc1_14_bc2_88_bc3_52	33	309
	0427_3_bc1_14_bc2_88_bc3_6	241	6233
	0427_3_bc1_14_bc2_88_bc3_63	27	550
	0427_3_bc1_14_bc2_88_bc3_72	23	236
	0427_3_bc1_14_bc2_88_bc3_87	47	815
	0427_3_bc1_14_bc2_89_bc3_26	71	884
	0427_3_bc1_14_bc2_89_bc3_28	54	478
	0427_3_bc1_14_bc2_9_bc3_13	23	121
	0427_3_bc1_14_bc2_9_bc3_17	15	325
	0427_3_bc1_14_bc2_9_bc3_23	25	200
	0427_3_bc1_14_bc2_9_bc3_89	17	465
	0427_3_bc1_14_bc2_90_bc3_38	392	8359
	0427_3_bc1_14_bc2_90_bc3_9	20	519
	0427_3_bc1_14_bc2_90_bc3_91	40	560
	0427_3_bc1_14_bc2_91_bc3_19	14	140
	0427_3_bc1_14_bc2_91_bc3_2	17	211
	0427_3_bc1_14_bc2_91_bc3_35	74	963
	0427_3_bc1_14_bc2_91_bc3_96	19	351
	0427_3_bc1_14_bc2_93_bc3_55	20	390
	0427_3_bc1_14_bc2_93_bc3_57	47	433
	0427_3_bc1_14_bc2_93_bc3_94	36	464
	0427_3_bc1_14_bc2_94_bc3_76	569	11003
	0427_3_bc1_14_bc2_95_bc3_49	15	148
	0427_3_bc1_14_bc2_95_bc3_63	297	5169
	0427_3_bc1_14_bc2_96_bc3_27	33	587
	0427_3_bc1_14_bc2_96_bc3_41	24	527
	0427_3_bc1_14_bc2_96_bc3_44	20	241
	0427_3_bc1_14_bc2_96_bc3_81	22	387
	0427_3_bc1_15_bc2_1_bc3_38	16	357
	0427_3_bc1_15_bc2_1_bc3_78	28	264
	0427_3_bc1_15_bc2_10_bc3_25	32	758
	0427_3_bc1_15_bc2_10_bc3_35	21	390
	0427_3_bc1_15_bc2_10_bc3_37	22	332
	0427_3_bc1_15_bc2_10_bc3_42	35	339
	0427_3_bc1_15_bc2_10_bc3_74	20	342
	0427_3_bc1_15_bc2_11_bc3_17	62	1155
	0427_3_bc1_15_bc2_11_bc3_50	22	471
	0427_3_bc1_15_bc2_11_bc3_58	23	102
	0427_3_bc1_15_bc2_11_bc3_9	64	1012
	0427_3_bc1_15_bc2_11_bc3_90	198	4040
	0427_3_bc1_15_bc2_12_bc3_30	58	766
	0427_3_bc1_15_bc2_12_bc3_35	55	1014
	0427_3_bc1_15_bc2_12_bc3_53	48	760
	0427_3_bc1_15_bc2_12_bc3_57	62	1223
	0427_3_bc1_15_bc2_12_bc3_58	41	390
	0427_3_bc1_15_bc2_12_bc3_80	47	709
	0427_3_bc1_15_bc2_12_bc3_9	53	832
	0427_3_bc1_15_bc2_13_bc3_28	9	10
	0427_3_bc1_15_bc2_13_bc3_68	24	378
	0427_3_bc1_15_bc2_14_bc3_18	590	11867
	0427_3_bc1_15_bc2_14_bc3_22	54	1213
	0427_3_bc1_15_bc2_14_bc3_30	33	676
	0427_3_bc1_15_bc2_14_bc3_33	41	680
	0427_3_bc1_15_bc2_14_bc3_57	72	1046
	0427_3_bc1_15_bc2_14_bc3_83	305	5469
	0427_3_bc1_15_bc2_15_bc3_20	296	5492
	0427_3_bc1_15_bc2_15_bc3_30	56	796
	0427_3_bc1_15_bc2_15_bc3_40	26	449
	0427_3_bc1_15_bc2_15_bc3_5	27	515
	0427_3_bc1_15_bc2_15_bc3_63	44	801
	0427_3_bc1_15_bc2_15_bc3_77	373	6921
	0427_3_bc1_15_bc2_16_bc3_28	43	545
	0427_3_bc1_15_bc2_16_bc3_59	301	8991
	0427_3_bc1_15_bc2_16_bc3_63	245	4618
	0427_3_bc1_15_bc2_16_bc3_67	55	547
	0427_3_bc1_15_bc2_17_bc3_27	48	583
	0427_3_bc1_15_bc2_17_bc3_67	38	783
	0427_3_bc1_15_bc2_17_bc3_78	20	434
	0427_3_bc1_15_bc2_18_bc3_21	400	8310
	0427_3_bc1_15_bc2_18_bc3_23	28	339
	0427_3_bc1_15_bc2_18_bc3_3	61	812
	0427_3_bc1_15_bc2_18_bc3_76	51	895
	0427_3_bc1_15_bc2_18_bc3_82	42	561
	0427_3_bc1_15_bc2_19_bc3_32	42	373
	0427_3_bc1_15_bc2_19_bc3_70	77	1428
	0427_3_bc1_15_bc2_2_bc3_15	17	220
	0427_3_bc1_15_bc2_2_bc3_83	34	741
	0427_3_bc1_15_bc2_2_bc3_85	24	383
	0427_3_bc1_15_bc2_20_bc3_22	12	189
	0427_3_bc1_15_bc2_20_bc3_65	18	393
	0427_3_bc1_15_bc2_20_bc3_68	25	310
	0427_3_bc1_15_bc2_20_bc3_88	22	460
	0427_3_bc1_15_bc2_21_bc3_11	21	343
	0427_3_bc1_15_bc2_21_bc3_5	16	267
	0427_3_bc1_15_bc2_21_bc3_80	255	5689
	0427_3_bc1_15_bc2_21_bc3_82	30	677
	0427_3_bc1_15_bc2_21_bc3_90	31	470
	0427_3_bc1_15_bc2_22_bc3_15	26	537
	0427_3_bc1_15_bc2_22_bc3_3	49	692
	0427_3_bc1_15_bc2_22_bc3_50	24	316
	0427_3_bc1_15_bc2_22_bc3_53	27	450
	0427_3_bc1_15_bc2_22_bc3_76	38	582
	0427_3_bc1_15_bc2_22_bc3_95	70	1132
	0427_3_bc1_15_bc2_23_bc3_11	13	351
	0427_3_bc1_15_bc2_23_bc3_21	22	370
	0427_3_bc1_15_bc2_23_bc3_61	20	387
	0427_3_bc1_15_bc2_23_bc3_87	27	973
	0427_3_bc1_15_bc2_23_bc3_90	255	6205
	0427_3_bc1_15_bc2_24_bc3_14	267	4843
	0427_3_bc1_15_bc2_24_bc3_50	23	333
	0427_3_bc1_15_bc2_24_bc3_69	46	824
	0427_3_bc1_15_bc2_24_bc3_77	65	1188
	0427_3_bc1_15_bc2_25_bc3_62	369	8576
	0427_3_bc1_15_bc2_25_bc3_85	39	831
	0427_3_bc1_15_bc2_26_bc3_58	36	554
	0427_3_bc1_15_bc2_26_bc3_60	39	611
	0427_3_bc1_15_bc2_26_bc3_95	36	548
	0427_3_bc1_15_bc2_27_bc3_28	19	307
	0427_3_bc1_15_bc2_27_bc3_32	50	771
	0427_3_bc1_15_bc2_27_bc3_43	15	277
	0427_3_bc1_15_bc2_27_bc3_56	55	814
	0427_3_bc1_15_bc2_27_bc3_57	26	460
	0427_3_bc1_15_bc2_27_bc3_63	317	7760
	0427_3_bc1_15_bc2_28_bc3_12	45	679
	0427_3_bc1_15_bc2_28_bc3_75	39	572
	0427_3_bc1_15_bc2_29_bc3_22	63	823
	0427_3_bc1_15_bc2_29_bc3_70	18	393
	0427_3_bc1_15_bc2_3_bc3_38	356	7665
	0427_3_bc1_15_bc2_3_bc3_42	23	117
	0427_3_bc1_15_bc2_3_bc3_87	27	371
	0427_3_bc1_15_bc2_30_bc3_38	28	317
	0427_3_bc1_15_bc2_30_bc3_52	31	425
	0427_3_bc1_15_bc2_30_bc3_61	55	741
	0427_3_bc1_15_bc2_30_bc3_73	28	758
	0427_3_bc1_15_bc2_30_bc3_79	55	619
	0427_3_bc1_15_bc2_30_bc3_87	23	495
	0427_3_bc1_15_bc2_31_bc3_11	38	815
	0427_3_bc1_15_bc2_31_bc3_29	26	567
	0427_3_bc1_15_bc2_31_bc3_50	39	587
	0427_3_bc1_15_bc2_31_bc3_73	43	953
	0427_3_bc1_15_bc2_31_bc3_90	11	402
	0427_3_bc1_15_bc2_31_bc3_93	65	1182
	0427_3_bc1_15_bc2_32_bc3_12	36	462
	0427_3_bc1_15_bc2_32_bc3_5	45	836
	0427_3_bc1_15_bc2_32_bc3_87	32	624
	0427_3_bc1_15_bc2_33_bc3_26	79	1156
	0427_3_bc1_15_bc2_33_bc3_32	41	573
	0427_3_bc1_15_bc2_33_bc3_43	67	470
	0427_3_bc1_15_bc2_33_bc3_47	15	329
	0427_3_bc1_15_bc2_33_bc3_55	73	754
	0427_3_bc1_15_bc2_33_bc3_6	287	5726
	0427_3_bc1_15_bc2_33_bc3_78	263	5230
	0427_3_bc1_15_bc2_34_bc3_39	376	9194
	0427_3_bc1_15_bc2_34_bc3_43	22	251
	0427_3_bc1_15_bc2_34_bc3_44	49	913
	0427_3_bc1_15_bc2_34_bc3_5	37	567
	0427_3_bc1_15_bc2_34_bc3_54	53	638
	0427_3_bc1_15_bc2_34_bc3_55	32	562
	0427_3_bc1_15_bc2_34_bc3_56	17	270
	0427_3_bc1_15_bc2_35_bc3_31	17	526
	0427_3_bc1_15_bc2_35_bc3_65	13	227
	0427_3_bc1_15_bc2_35_bc3_70	29	545
	0427_3_bc1_15_bc2_35_bc3_73	251	6324
	0427_3_bc1_15_bc2_35_bc3_76	204	5904
	0427_3_bc1_15_bc2_35_bc3_77	29	364
	0427_3_bc1_15_bc2_35_bc3_78	53	672
	0427_3_bc1_15_bc2_36_bc3_58	20	290
	0427_3_bc1_15_bc2_37_bc3_13	17	290
	0427_3_bc1_15_bc2_37_bc3_42	36	386
	0427_3_bc1_15_bc2_37_bc3_51	32	383
	0427_3_bc1_15_bc2_37_bc3_6	43	647
	0427_3_bc1_15_bc2_37_bc3_8	32	225
	0427_3_bc1_15_bc2_39_bc3_14	17	86
	0427_3_bc1_15_bc2_39_bc3_26	45	501
	0427_3_bc1_15_bc2_39_bc3_57	29	539
	0427_3_bc1_15_bc2_4_bc3_2	32	505
	0427_3_bc1_15_bc2_4_bc3_48	27	254
	0427_3_bc1_15_bc2_4_bc3_60	47	721
	0427_3_bc1_15_bc2_4_bc3_63	53	883
	0427_3_bc1_15_bc2_40_bc3_8	57	902
	0427_3_bc1_15_bc2_40_bc3_94	36	380
	0427_3_bc1_15_bc2_41_bc3_46	41	617
	0427_3_bc1_15_bc2_42_bc3_33	20	249
	0427_3_bc1_15_bc2_43_bc3_16	27	587
	0427_3_bc1_15_bc2_43_bc3_92	241	4839
	0427_3_bc1_15_bc2_44_bc3_23	46	676
	0427_3_bc1_15_bc2_44_bc3_37	372	6223
	0427_3_bc1_15_bc2_44_bc3_75	21	290
	0427_3_bc1_15_bc2_45_bc3_37	38	373
	0427_3_bc1_15_bc2_45_bc3_59	270	5778
	0427_3_bc1_15_bc2_45_bc3_66	401	9412
	0427_3_bc1_15_bc2_45_bc3_82	29	418
	0427_3_bc1_15_bc2_45_bc3_90	232	6789
	0427_3_bc1_15_bc2_45_bc3_92	58	855
	0427_3_bc1_15_bc2_45_bc3_95	54	984
	0427_3_bc1_15_bc2_46_bc3_13	17	215
	0427_3_bc1_15_bc2_46_bc3_29	19	269
	0427_3_bc1_15_bc2_46_bc3_44	34	561
	0427_3_bc1_15_bc2_46_bc3_69	18	406
	0427_3_bc1_15_bc2_46_bc3_83	26	318
	0427_3_bc1_15_bc2_47_bc3_4	10	308
	0427_3_bc1_15_bc2_47_bc3_61	31	466
	0427_3_bc1_15_bc2_47_bc3_89	51	823
	0427_3_bc1_15_bc2_48_bc3_47	347	7472
	0427_3_bc1_15_bc2_48_bc3_88	29	387
	0427_3_bc1_15_bc2_49_bc3_2	15	411
	0427_3_bc1_15_bc2_49_bc3_45	27	266
	0427_3_bc1_15_bc2_49_bc3_65	30	533
	0427_3_bc1_15_bc2_49_bc3_70	311	5704
	0427_3_bc1_15_bc2_49_bc3_9	62	984
	0427_3_bc1_15_bc2_49_bc3_93	19	298
	0427_3_bc1_15_bc2_50_bc3_27	22	337
	0427_3_bc1_15_bc2_50_bc3_31	43	889
	0427_3_bc1_15_bc2_51_bc3_88	14	249
	0427_3_bc1_15_bc2_52_bc3_22	39	875
	0427_3_bc1_15_bc2_52_bc3_41	30	540
	0427_3_bc1_15_bc2_52_bc3_45	679	16495
	0427_3_bc1_15_bc2_52_bc3_89	18	282
	0427_3_bc1_15_bc2_53_bc3_64	18	220
	0427_3_bc1_15_bc2_53_bc3_9	44	699
	0427_3_bc1_15_bc2_54_bc3_17	7	358
	0427_3_bc1_15_bc2_54_bc3_5	25	372
	0427_3_bc1_15_bc2_54_bc3_75	15	426
	0427_3_bc1_15_bc2_54_bc3_79	37	485
	0427_3_bc1_15_bc2_56_bc3_3	360	6557
	0427_3_bc1_15_bc2_57_bc3_15	43	978
	0427_3_bc1_15_bc2_57_bc3_49	14	231
	0427_3_bc1_15_bc2_57_bc3_52	32	696
	0427_3_bc1_15_bc2_57_bc3_78	234	4861
	0427_3_bc1_15_bc2_57_bc3_80	62	849
	0427_3_bc1_15_bc2_57_bc3_88	38	781
	0427_3_bc1_15_bc2_58_bc3_10	43	836
	0427_3_bc1_15_bc2_58_bc3_42	13	212
	0427_3_bc1_15_bc2_58_bc3_80	42	562
	0427_3_bc1_15_bc2_59_bc3_13	17	208
	0427_3_bc1_15_bc2_59_bc3_43	35	350
	0427_3_bc1_15_bc2_6_bc3_33	32	381
	0427_3_bc1_15_bc2_6_bc3_89	29	317
	0427_3_bc1_15_bc2_60_bc3_26	20	243
	0427_3_bc1_15_bc2_60_bc3_27	27	405
	0427_3_bc1_15_bc2_60_bc3_46	31	560
	0427_3_bc1_15_bc2_60_bc3_68	376	7077
	0427_3_bc1_15_bc2_60_bc3_73	44	635
	0427_3_bc1_15_bc2_60_bc3_75	23	422
	0427_3_bc1_15_bc2_61_bc3_26	29	711
	0427_3_bc1_15_bc2_61_bc3_37	17	223
	0427_3_bc1_15_bc2_61_bc3_66	18	146
	0427_3_bc1_15_bc2_61_bc3_86	52	900
	0427_3_bc1_15_bc2_61_bc3_93	28	653
	0427_3_bc1_15_bc2_62_bc3_15	13	378
	0427_3_bc1_15_bc2_62_bc3_17	286	4580
	0427_3_bc1_15_bc2_62_bc3_23	54	518
	0427_3_bc1_15_bc2_62_bc3_94	34	775
	0427_3_bc1_15_bc2_63_bc3_44	60	1044
	0427_3_bc1_15_bc2_63_bc3_57	20	331
	0427_3_bc1_15_bc2_63_bc3_72	26	463
	0427_3_bc1_15_bc2_63_bc3_88	22	301
	0427_3_bc1_15_bc2_63_bc3_91	47	877
	0427_3_bc1_15_bc2_64_bc3_80	25	536
	0427_3_bc1_15_bc2_64_bc3_94	14	337
	0427_3_bc1_15_bc2_65_bc3_14	43	934
	0427_3_bc1_15_bc2_65_bc3_25	25	300
	0427_3_bc1_15_bc2_65_bc3_65	21	382
	0427_3_bc1_15_bc2_65_bc3_70	41	661
	0427_3_bc1_15_bc2_65_bc3_85	12	291
	0427_3_bc1_15_bc2_65_bc3_92	34	387
	0427_3_bc1_15_bc2_66_bc3_29	39	735
	0427_3_bc1_15_bc2_66_bc3_48	290	3867
	0427_3_bc1_15_bc2_66_bc3_50	39	608
	0427_3_bc1_15_bc2_66_bc3_52	50	958
	0427_3_bc1_15_bc2_66_bc3_53	36	660
	0427_3_bc1_15_bc2_66_bc3_75	34	457
	0427_3_bc1_15_bc2_66_bc3_87	13	199
	0427_3_bc1_15_bc2_67_bc3_2	249	3833
	0427_3_bc1_15_bc2_67_bc3_27	765	15175
	0427_3_bc1_15_bc2_67_bc3_29	309	9190
	0427_3_bc1_15_bc2_67_bc3_41	322	6845
	0427_3_bc1_15_bc2_67_bc3_58	20	582
	0427_3_bc1_15_bc2_67_bc3_75	15	405
	0427_3_bc1_15_bc2_67_bc3_83	366	7882
	0427_3_bc1_15_bc2_67_bc3_87	270	4669
	0427_3_bc1_15_bc2_67_bc3_92	30	542
	0427_3_bc1_15_bc2_68_bc3_84	17	450
	0427_3_bc1_15_bc2_68_bc3_87	32	442
	0427_3_bc1_15_bc2_68_bc3_92	54	768
	0427_3_bc1_15_bc2_69_bc3_50	16	208
	0427_3_bc1_15_bc2_69_bc3_67	32	559
	0427_3_bc1_15_bc2_69_bc3_96	16	176
	0427_3_bc1_15_bc2_7_bc3_16	19	347
	0427_3_bc1_15_bc2_7_bc3_20	12	216
	0427_3_bc1_15_bc2_7_bc3_63	44	499
	0427_3_bc1_15_bc2_70_bc3_21	22	368
	0427_3_bc1_15_bc2_70_bc3_87	21	489
	0427_3_bc1_15_bc2_72_bc3_83	41	778
	0427_3_bc1_15_bc2_73_bc3_32	33	393
	0427_3_bc1_15_bc2_73_bc3_38	52	936
	0427_3_bc1_15_bc2_73_bc3_46	258	6137
	0427_3_bc1_15_bc2_73_bc3_55	54	1064
	0427_3_bc1_15_bc2_73_bc3_57	24	304
	0427_3_bc1_15_bc2_75_bc3_13	40	580
	0427_3_bc1_15_bc2_75_bc3_39	49	1092
	0427_3_bc1_15_bc2_75_bc3_45	44	1351
	0427_3_bc1_15_bc2_75_bc3_69	29	704
	0427_3_bc1_15_bc2_75_bc3_71	45	519
	0427_3_bc1_15_bc2_76_bc3_77	27	551
	0427_3_bc1_15_bc2_76_bc3_91	25	289
	0427_3_bc1_15_bc2_76_bc3_92	433	12154
	0427_3_bc1_15_bc2_76_bc3_93	234	8572
	0427_3_bc1_15_bc2_77_bc3_79	340	8825
	0427_3_bc1_15_bc2_78_bc3_94	16	393
	0427_3_bc1_15_bc2_79_bc3_47	27	282
	0427_3_bc1_15_bc2_79_bc3_7	18	429
	0427_3_bc1_15_bc2_79_bc3_79	18	264
	0427_3_bc1_15_bc2_8_bc3_12	11	12
	0427_3_bc1_15_bc2_8_bc3_29	349	8206
	0427_3_bc1_15_bc2_80_bc3_42	15	168
	0427_3_bc1_15_bc2_81_bc3_43	25	392
	0427_3_bc1_15_bc2_81_bc3_45	14	282
	0427_3_bc1_15_bc2_81_bc3_89	404	7780
	0427_3_bc1_15_bc2_82_bc3_43	49	586
	0427_3_bc1_15_bc2_82_bc3_44	223	4190
	0427_3_bc1_15_bc2_82_bc3_95	30	503
	0427_3_bc1_15_bc2_83_bc3_39	27	591
	0427_3_bc1_15_bc2_83_bc3_55	15	218
	0427_3_bc1_15_bc2_83_bc3_83	42	812
	0427_3_bc1_15_bc2_84_bc3_18	53	982
	0427_3_bc1_15_bc2_84_bc3_28	32	449
	0427_3_bc1_15_bc2_84_bc3_29	265	5708
	0427_3_bc1_15_bc2_84_bc3_31	56	1044
	0427_3_bc1_15_bc2_84_bc3_52	33	659
	0427_3_bc1_15_bc2_84_bc3_8	583	11158
	0427_3_bc1_15_bc2_84_bc3_92	38	520
	0427_3_bc1_15_bc2_85_bc3_11	11	289
	0427_3_bc1_15_bc2_85_bc3_40	275	4927
	0427_3_bc1_15_bc2_85_bc3_5	33	313
	0427_3_bc1_15_bc2_85_bc3_65	32	569
	0427_3_bc1_15_bc2_86_bc3_19	44	401
	0427_3_bc1_15_bc2_86_bc3_43	258	6417
	0427_3_bc1_15_bc2_86_bc3_73	33	622
	0427_3_bc1_15_bc2_86_bc3_84	23	365
	0427_3_bc1_15_bc2_87_bc3_23	59	960
	0427_3_bc1_15_bc2_87_bc3_8	27	391
	0427_3_bc1_15_bc2_87_bc3_94	27	578
	0427_3_bc1_15_bc2_87_bc3_96	26	493
	0427_3_bc1_15_bc2_88_bc3_49	34	702
	0427_3_bc1_15_bc2_88_bc3_91	886	20367
	0427_3_bc1_15_bc2_89_bc3_24	18	376
	0427_3_bc1_15_bc2_89_bc3_3	45	486
	0427_3_bc1_15_bc2_89_bc3_66	44	788
	0427_3_bc1_15_bc2_89_bc3_96	42	386
	0427_3_bc1_15_bc2_9_bc3_15	28	331
	0427_3_bc1_15_bc2_90_bc3_14	16	305
	0427_3_bc1_15_bc2_90_bc3_17	36	463
	0427_3_bc1_15_bc2_90_bc3_50	32	583
	0427_3_bc1_15_bc2_90_bc3_6	979	15649
	0427_3_bc1_15_bc2_90_bc3_82	48	665
	0427_3_bc1_15_bc2_90_bc3_90	49	961
	0427_3_bc1_15_bc2_91_bc3_17	36	645
	0427_3_bc1_15_bc2_91_bc3_20	19	203
	0427_3_bc1_15_bc2_92_bc3_11	12	455
	0427_3_bc1_15_bc2_92_bc3_84	16	133
	0427_3_bc1_15_bc2_93_bc3_21	29	395
	0427_3_bc1_15_bc2_93_bc3_59	13	300
	0427_3_bc1_15_bc2_93_bc3_60	65	858
	0427_3_bc1_15_bc2_93_bc3_71	253	6055
	0427_3_bc1_15_bc2_94_bc3_14	29	515
	0427_3_bc1_15_bc2_94_bc3_3	16	306
	0427_3_bc1_15_bc2_94_bc3_44	24	434
	0427_3_bc1_15_bc2_94_bc3_6	15	420
	0427_3_bc1_15_bc2_94_bc3_86	19	316
	0427_3_bc1_15_bc2_94_bc3_90	35	431
	0427_3_bc1_15_bc2_95_bc3_38	67	876
	0427_3_bc1_15_bc2_95_bc3_44	39	553
	0427_3_bc1_15_bc2_95_bc3_46	19	393
	0427_3_bc1_15_bc2_95_bc3_51	217	5363
	0427_3_bc1_15_bc2_95_bc3_54	54	820
	0427_3_bc1_15_bc2_95_bc3_57	42	845
	0427_3_bc1_15_bc2_95_bc3_65	30	719
	0427_3_bc1_15_bc2_95_bc3_69	40	826
	0427_3_bc1_15_bc2_96_bc3_24	25	544
[truncated: 26,244 more rows]

## Sheet: Figure 1-figure supplement 1D
Sequencing Saturation
Percentage of data	20% data	40% data	60% data	80% data	100% data
Data of exponential period E. coli	1553	2931	3973	6294	6295		Figure 1-figure supplement 1D. Sequencing Saturation of exponential period E. coli
	1409	2695	3781	6065	6060		Percentage of data	Total UMIs	Total number of confidently mapped reads	Sequencing Saturation
	814	1502	2144	3440	3440		0% data	0	0	0
	746	1370	1878	3046	3045		20% data	1611443	21228997	0.924092
	670	1274	1810	2924	2922		40% data	3119186	42408745	0.926449
	651	1270	1787	2907	2905		60% data	3751004	56068639	0.9331
	646	1229	1699	2766	2768		80% data	5919096	75491795	0.921593
	608	1210	1682	2743	2746		100% data	6063789	93461294	0.93512
	594	1153	1616	2687	2688
	568	1138	1579	2527	2525
	567	1105	1571	2486	2489
	547	1097	1535	2478	2475
	543	1086	1521	2473	2472
	530	1031	1420	2301	2305
	500	915	1285	2085	2085
	484	915	1248	2069	2068
	482	905	1244	2031	2030
	464	894	1239	2019	2016
	462	886	1216	1979	1981
	455	881	1212	1948	1947
	453	868	1211	1933	1935
	450	859	1193	1911	1911
	443	822	1152	1910	1910
	430	809	1151	1890	1889
	413	809	1133	1876	1876
	407	789	1130	1844	1845
	403	772	1086	1794	1794
	403	766	1082	1714	1715
	402	764	1052	1710	1712
	399	737	1045	1671	1676
	394	732	1010	1653	1652
	385	727	1008	1644	1645
	377	727	1005	1643	1642
	377	723	1004	1629	1631
	376	720	1000	1611	1613
	373	704	994	1607	1608
	369	703	971	1594	1597
	368	696	971	1594	1596
	366	691	971	1590	1592
	363	688	959	1586	1586
	358	688	954	1546	1545
	353	683	954	1545	1544
	351	682	952	1540	1544
	350	680	950	1539	1538
	349	680	947	1524	1522
	349	679	932	1522	1520
	348	679	926	1500	1502
	347	674	925	1494	1494
	346	671	925	1493	1494
	344	669	908	1492	1490
	339	646	900	1478	1479
	339	645	900	1478	1477
	339	640	899	1467	1469
	337	639	897	1452	1450
	336	639	897	1452	1450
	335	629	894	1427	1425
	333	624	878	1418	1418
	329	619	860	1387	1387
	327	619	860	1378	1379
	326	618	859	1372	1373
	326	616	842	1359	1360
	325	613	841	1355	1356
	324	611	840	1355	1356
	323	607	840	1353	1354
	322	602	839	1348	1347
	320	592	838	1348	1347
	318	592	827	1348	1346
	318	589	822	1343	1343
	314	588	818	1341	1341
	308	585	818	1333	1333
	307	583	807	1326	1326
	307	582	801	1319	1320
	306	573	799	1303	1302
	302	572	794	1299	1299
	299	570	793	1299	1298
	298	566	789	1297	1297
	297	564	781	1283	1281
	296	561	780	1275	1277
	296	560	777	1270	1271
	294	559	776	1266	1266
	290	558	773	1263	1262
	290	554	769	1257	1256
	288	553	766	1253	1253
	287	552	765	1251	1252
	286	548	760	1245	1248
	285	548	755	1241	1240
	285	546	754	1235	1235
	285	544	753	1228	1228
	284	541	752	1225	1225
	283	539	750	1221	1220
	281	537	750	1220	1219
	280	536	745	1219	1217
	279	534	743	1209	1210
	278	534	742	1204	1204
	277	531	740	1200	1201
	276	530	739	1194	1193
	275	528	735	1187	1188
	275	525	728	1179	1180
	274	524	727	1175	1174
	273	523	724	1173	1173
	273	522	722	1171	1171
	270	521	721	1170	1170
	269	518	720	1167	1168
	269	518	719	1163	1164
	268	516	718	1159	1159
	267	512	718	1157	1157
	266	512	715	1156	1157
	265	511	714	1155	1154
	265	511	712	1146	1147
	265	510	712	1146	1146
	264	509	709	1146	1145
	263	509	707	1144	1144
	263	508	706	1139	1140
	261	505	706	1133	1134
	261	501	702	1132	1132
	260	498	696	1129	1128
	260	497	696	1120	1121
	259	497	696	1119	1119
	259	497	692	1116	1115
	258	496	692	1111	1112
	257	493	691	1108	1108
	257	493	690	1108	1107
	255	492	685	1104	1106
	254	491	683	1104	1104
	254	490	683	1103	1102
	254	489	681	1097	1098
	253	489	681	1090	1091
	253	485	677	1090	1090
	251	485	672	1090	1090
	251	484	672	1089	1088
	250	482	671	1085	1085
	250	480	667	1082	1083
	248	479	666	1079	1079
	248	477	665	1078	1078
	246	474	661	1078	1078
	246	469	660	1070	1070
	246	469	656	1065	1065
	245	468	656	1059	1059
	245	468	653	1058	1059
	244	465	653	1057	1057
	244	465	651	1056	1056
	244	464	651	1054	1055
	243	464	647	1053	1053
	243	464	647	1053	1053
	243	460	646	1053	1053
	242	459	644	1052	1052
	240	457	642	1044	1044
	240	457	642	1041	1041
	240	456	642	1041	1041
	239	455	639	1040	1041
	239	454	638	1039	1040
	239	453	638	1037	1037
	239	453	636	1035	1035
	238	452	635	1034	1034
	238	452	632	1032	1031
	238	451	631	1028	1030
	238	450	630	1024	1024
	237	450	628	1023	1023
	237	450	628	1022	1021
	236	449	625	1022	1021
	236	449	625	1020	1020
	236	449	624	1019	1019
	236	448	621	1013	1015
	236	448	620	1006	1008
	234	447	619	1004	1004
	234	447	619	1004	1003
	232	446	618	1003	1003
	231	445	617	1002	1003
	231	445	616	1002	1002
	230	443	616	997	998
	230	443	616	996	996
	230	442	612	995	995
	229	441	612	995	995
	229	441	610	991	992
	228	438	609	990	990
	228	437	609	989	989
	228	435	606	988	987
	228	435	606	987	986
	227	434	605	985	986
	227	434	605	984	986
	226	434	604	983	982
	226	430	603	978	977
	226	430	602	978	977
	226	429	600	973	974
	226	428	598	968	967
	225	427	595	968	967
	225	427	592	967	966
	225	427	592	962	962
	225	427	591	961	962
	224	426	591	960	961
	224	425	591	960	960
	224	425	590	959	959
	223	424	588	958	957
	222	424	588	956	955
	222	424	587	953	953
	222	422	587	951	952
	222	422	584	951	951
	221	421	580	945	946
	221	421	580	944	945
	221	420	578	943	943
	220	420	578	938	936
	220	419	577	936	935
	219	418	577	935	934
	219	417	576	933	934
	219	417	576	932	932
	219	416	576	931	931
	219	416	575	931	931
	218	414	574	930	929
	218	413	574	926	924
	218	413	571	922	921
	218	412	571	921	921
	218	412	570	920	921
	218	412	569	915	917
	217	411	569	914	915
	217	411	569	914	915
	217	411	568	914	914
	217	410	567	914	914
	217	410	567	913	913
	215	408	565	913	912
	215	408	564	912	911
	215	407	563	911	910
	215	407	563	908	908
	215	406	563	904	905
	214	406	562	904	904
	214	405	562	903	903
	212	404	560	902	903
	212	404	560	902	902
	212	404	557	902	901
	211	404	557	900	900
	211	399	554	899	900
	211	399	554	898	899
	211	399	554	897	896
	210	398	552	897	896
	210	397	551	896	895
	210	397	551	893	894
	209	397	551	892	892
	209	397	551	890	890
	209	397	549	888	888
	209	396	549	886	887
	208	396	548	885	885
	208	395	547	882	883
	208	394	543	882	883
	208	390	542	879	879
	207	390	541	877	877
	207	390	541	875	875
	207	390	539	874	874
	207	389	538	873	873
	207	389	537	873	873
	207	389	536	871	869
	206	388	534	869	869
	206	388	534	866	865
	206	388	532	864	865
	205	388	531	864	863
	205	387	531	862	862
	204	386	531	861	861
	204	386	530	859	858
	204	386	530	858	858
	203	385	528	856	857
	203	384	528	853	854
	203	384	528	851	852
	203	384	527	851	851
	203	383	527	850	849
	202	383	526	846	848
	202	383	525	844	844
	202	382	525	843	843
	202	382	524	843	843
	201	381	523	842	841
	200	381	523	841	840
	199	380	522	841	840
	199	380	522	838	839
	199	380	522	838	838
	198	380	521	837	836
	198	379	521	836	836
	198	379	521	833	833
	198	377	521	832	832
	197	376	520	831	832
	197	374	518	831	830
	196	374	518	829	829
	196	373	518	829	828
	196	372	518	828	828
	196	372	517	827	826
	196	371	516	826	826
	195	371	515	825	825
	195	370	514	824	825
	195	369	514	824	824
	195	369	514	824	824
	195	369	513	824	823
	194	369	513	824	823
	194	369	512	823	823
	194	368	511	822	821
	194	368	511	822	821
	194	368	511	822	821
	194	367	511	820	820
	194	367	511	820	819
	194	366	511	819	819
	194	366	510	819	819
	193	366	510	819	819
	193	365	510	817	818
	192	365	510	816	816
	192	365	510	815	815
	192	364	510	814	814
	191	364	506	813	813
	191	363	505	813	813
	191	363	505	811	811
	191	363	504	811	809
	191	363	504	810	809
	191	362	503	809	808
	191	362	503	808	808
	191	362	503	806	807
	190	361	502	806	805
	190	361	502	805	805
	190	360	502	803	804
	190	360	502	803	803
	190	360	502	802	803
	190	360	501	802	803
	189	360	500	802	802
	189	360	500	802	802
	189	359	500	801	801
	189	359	499	801	801
	189	359	499	801	801
	188	359	499	801	800
	188	358	497	799	800
	188	358	497	799	799
	188	358	497	799	798
	188	356	496	798	796
	188	356	496	797	796
	188	356	496	796	795
	188	355	495	795	795
	187	355	495	794	794
	187	355	495	794	793
	187	354	494	793	793
	186	354	494	792	792
	186	354	492	792	792
	186	353	492	792	792
	186	353	491	790	790
	186	352	489	789	790
	185	352	488	789	790
	185	352	487	789	789
	185	351	487	789	788
	185	351	487	787	788
	185	351	486	785	785
	185	350	486	785	785
	185	350	485	785	784
	185	350	485	784	784
	185	350	485	784	784
	185	349	484	783	782
	184	349	484	781	781
	184	348	483	780	781
	184	348	483	779	781
	184	348	483	779	779
	184	348	483	779	779
	183	348	482	778	779
	183	348	482	778	777
	182	348	482	777	777
	182	347	481	777	776
	182	347	480	777	776
	182	347	480	776	776
	182	345	480	775	775
	181	345	480	775	775
	181	344	479	773	772
	180	344	479	771	771
	180	344	479	770	770
	180	343	479	770	769
	180	343	479	769	769
	179	343	479	769	768
	179	342	479	768	768
	179	342	478	768	768
	179	342	478	768	767
	179	342	478	767	766
	179	341	477	767	766
	179	341	477	766	766
	179	341	475	766	765
	179	341	474	766	765
	178	340	474	765	764
	178	340	474	764	764
	178	340	473	764	764
	177	340	472	763	762
	177	340	472	762	762
	177	339	472	762	761
	177	339	471	761	761
	177	338	470	761	760
	177	338	470	759	760
	177	338	469	759	759
	176	338	469	759	759
	176	338	468	758	758
	176	337	467	758	758
	175	337	467	758	758
	175	337	467	757	757
	175	336	467	756	756
	175	336	466	756	756
	175	335	466	756	756
	175	334	466	755	756
	175	334	465	755	755
	174	334	465	755	755
	174	334	465	755	755
	174	334	464	754	755
	174	334	464	754	754
	174	334	464	752	753
	174	333	464	752	753
	173	332	464	752	753
	173	332	463	752	752
	173	332	462	751	751
	173	332	462	751	750
	173	332	462	748	748
	173	330	462	747	747
	173	330	461	746	746
	173	330	460	745	746
	173	330	460	745	744
	173	329	460	744	744
	172	329	460	744	743
	172	329	459	744	743
	172	328	459	744	743
	172	328	458	743	743
	172	328	458	741	742
	172	328	457	741	741
	172	328	457	739	740
	172	328	457	738	740
	171	328	457	737	737
	171	327	456	736	736
	171	327	456	736	734
	171	327	456	736	734
	171	327	456	734	733
	171	326	455	734	733
	171	326	455	734	732
	171	326	455	733	732
	170	326	455	733	732
	170	325	454	733	732
	170	325	454	733	732
	170	325	454	732	732
	170	325	454	732	732
	170	325	453	732	731
	170	325	453	731	731
	169	324	453	731	731
	169	324	452	731	731
	169	324	452	731	731
	169	323	452	730	729
	169	323	451	729	729
	169	323	451	728	728
	169	323	451	728	728
	169	322	450	727	727
	169	322	450	726	726
	169	322	450	726	725
	168	322	450	726	725
	168	322	450	725	725
	168	322	448	725	725
	168	322	447	725	725
	168	322	447	725	724
	168	321	447	725	724
	168	321	446	724	723
	168	321	446	724	723
	168	321	446	723	723
	168	320	444	723	723
	168	320	444	722	722
	168	320	444	722	722
	168	320	443	722	722
	167	319	443	721	722
	167	319	443	721	721
	167	319	443	720	720
	167	319	443	719	719
	167	319	443	718	718
	167	319	443	717	717
	167	318	443	717	717
	167	318	442	717	717
	167	318	442	717	717
	167	318	442	716	716
	166	318	441	716	716
	166	318	441	716	716
	166	318	441	716	715
	166	317	441	715	714
	166	317	441	715	714
	166	317	441	714	714
	166	317	441	714	714
	166	317	441	714	713
	166	316	440	713	713
	166	316	440	713	713
	166	316	440	713	713
	165	316	440	713	713
	165	316	438	712	712
	165	316	438	712	712
	165	315	438	712	712
	165	315	438	711	711
	165	315	437	710	710
	165	315	437	710	710
	165	315	437	710	710
	165	315	437	710	710
	165	315	437	708	708
	165	314	437	708	707
	165	314	437	708	707
	165	314	436	708	707
	164	314	436	707	707
	164	314	436	707	707
	164	314	436	707	707
	164	314	436	707	707
	164	314	436	707	706
	164	314	436	707	706
	164	313	435	706	706
	164	313	435	706	706
	164	313	435	705	705
	164	313	434	705	705
	164	313	434	704	705
	164	312	433	704	705
	164	312	433	704	704
	164	312	432	703	704
	164	312	432	703	703
	164	311	432	703	702
	164	311	431	702	702
	163	311	431	702	702
	163	311	431	702	702
	163	311	431	702	701
	163	310	431	701	701
	163	310	430	701	700
	163	310	430	700	700
	163	310	430	699	699
	163	310	430	699	699
	163	310	430	699	699
	162	309	430	698	699
	162	309	430	698	698
	162	309	429	698	697
	162	309	429	697	697
	162	309	429	697	697
	162	309	429	697	697
	162	309	429	697	697
	162	309	429	697	696
	162	308	428	696	696
	162	308	428	695	695
	162	308	427	695	695
	162	308	427	695	695
	161	308	427	694	694
	161	308	427	694	694
	161	307	426	693	693
	161	307	426	693	693
	161	307	426	693	693
	161	307	426	693	692
	161	307	425	693	692
	161	307	425	692	692
	161	307	425	692	692
	161	306	424	691	692
	161	306	424	691	691
	160	306	424	691	691
	160	306	424	691	691
	160	306	424	691	690
	160	305	423	690	690
	160	305	423	690	690
	160	305	423	689	689
	160	305	423	688	689
	160	305	423	688	688
	160	305	423	688	687
	160	305	422	687	686
	160	305	422	685	686
	160	305	422	685	685
	160	304	422	684	684
	159	304	422	684	684
	159	304	421	683	684
	159	304	421	683	682
	158	304	420	682	682
	158	304	420	682	682
	158	304	420	682	682
	158	304	420	681	681
	158	304	420	680	681
	158	303	420	680	680
	157	303	420	680	679
	157	303	420	679	679
	157	303	419	679	679
	157	303	419	679	679
	157	303	419	678	678
	157	302	419	678	678
	157	302	419	678	678
	157	302	418	677	678
	157	302	418	677	677
	157	302	418	676	676
	157	302	418	676	676
	156	302	418	676	676
	156	301	417	675	675
	156	301	417	675	674
	156	301	417	673	674
	156	301	417	673	673
	156	301	416	673	673
	156	301	415	673	673
	156	300	415	673	672
	156	300	415	672	672
	156	300	415	672	671
	156	300	415	671	671
	155	300	415	670	670
	155	300	415	670	670
	155	300	415	670	670
	155	299	414	670	669
	155	299	414	670	669
	155	298	413	669	668
	155	298	413	667	668
	155	298	413	667	666
	155	298	413	666	666
	154	298	413	666	666
	154	297	413	666	666
	154	297	411	666	666
	154	297	411	664	665
	154	297	411	664	664
	154	296	411	664	664
	154	296	410	664	664
	154	295	410	663	663
	154	295	410	663	663
	154	295	410	663	663
	154	295	410	663	663
	153	295	410	663	663
	153	294	410	662	662
	153	294	409	662	662
	153	294	409	662	662
	153	294	408	661	662
	153	294	408	661	662
	153	294	407	661	660
	153	294	407	660	660
	153	294	407	659	659
	152	294	406	658	657
	152	293	405	658	657
	152	293	405	657	656
	152	293	405	657	656
	152	292	405	657	656
	152	292	405	656	655
	152	292	405	656	655
	152	292	404	655	655
	152	292	404	655	655
	152	292	404	655	655
	152	292	404	655	655
	152	292	404	654	655
	152	291	404	654	654
	152	291	404	653	653
	152	291	404	653	653
	152	291	403	652	652
	152	291	403	651	651
	151	291	403	650	651
	151	291	403	649	649
	151	291	402	649	649
	151	290	402	649	649
	151	290	402	649	649
	151	290	402	649	648
	151	290	401	648	648
	151	290	401	648	647
	151	290	401	648	647
	151	289	400	648	647
	151	289	400	647	647
	151	289	400	647	647
	151	289	400	647	647
	151	289	400	646	646
	151	289	400	646	646
	151	289	400	646	646
	150	288	400	646	646
	150	288	400	646	645
	150	288	399	646	645
	150	288	399	645	645
	150	287	399	645	645
	150	287	399	645	645
	150	287	399	645	645
	150	287	398	644	644
	150	287	398	644	644
	149	287	398	643	644
	149	287	397	643	644
	149	286	397	643	643
	149	286	397	642	642
	149	286	396	641	641
	149	286	396	641	641
	149	286	396	641	641
	149	285	396	640	641
	149	285	396	640	641
	149	285	396	640	640
	149	285	395	639	639
	149	284	395	639	639
	149	284	395	637	638
	149	284	394	637	637
	149	284	394	636	636
	149	284	394	636	636
	148	283	394	636	636
	148	283	394	635	635
	148	283	394	635	635
	148	283	394	635	634
	148	283	393	634	634
	148	282	392	634	634
	148	282	392	633	634
	148	282	392	633	634
	148	282	392	633	633
	148	282	392	632	633
	148	282	392	632	632
	147	282	392	632	632
	147	282	391	632	632
	147	282	391	631	632
	147	282	391	631	632
	147	282	391	631	631
	147	282	391	631	631
	147	282	391	631	631
	147	281	391	630	630
	147	281	390	630	630
	147	281	390	630	630
	147	281	390	630	629
	147	281	389	629	629
	147	280	389	629	629
	147	280	389	629	628
	147	280	389	628	628
	147	280	389	628	628
	147	280	388	627	628
	147	280	388	627	627
	147	280	388	627	626
	147	280	388	626	626
	147	280	388	626	626
	146	280	387	625	626
	146	280	387	625	625
	146	280	387	625	625
	146	279	387	624	624
	146	279	386	624	624
	146	279	386	624	624
	146	278	386	624	624
	146	278	386	624	624
	146	278	386	624	623
	146	278	386	623	623
	145	278	386	623	623
	145	278	385	623	623
	145	278	385	623	622
	145	278	385	622	622
	145	278	385	622	622
	145	277	385	622	622
	145	277	385	621	621
	145	277	385	621	621
	145	277	384	621	621
	145	277	384	620	621
	145	277	384	620	620
	145	276	384	619	620
	145	276	384	619	620
	145	276	384	619	620
	144	276	383	619	620
	144	276	383	619	619
	144	276	383	619	619
	144	275	383	618	619
	144	275	382	618	619
	144	275	381	618	618
	144	275	381	618	618
	144	275	381	617	618
	144	275	381	617	618
	144	274	381	617	617
	144	274	380	616	617
	144	274	380	616	616
	144	274	380	615	615
	144	274	380	615	615
	144	274	379	615	615
	144	274	379	614	614
	143	273	379	614	614
	143	273	379	614	614
	143	273	379	614	614
	143	273	379	613	614
	143	273	379	613	613
	143	272	379	613	613
	143	272	378	613	612
	143	272	378	612	612
	143	272	378	612	612
	143	272	378	612	612
	143	272	378	612	612
	143	272	377	611	612
	143	272	377	611	611
	143	272	377	611	611
	142	272	376	611	611
	142	271	376	610	610
	142	271	376	610	610
	142	271	376	610	610
	142	271	376	609	609
	142	271	376	609	609
	142	271	376	609	608
	142	271	376	608	608
	142	270	375	608	608
	142	270	375	608	607
	142	270	375	607	607
	142	270	375	607	607
	142	270	375	607	607
	142	270	374	607	607
	142	270	374	606	607
	142	270	374	606	606
	142	270	374	606	606
	142	270	374	606	606
	141	269	374	605	606
	141	269	373	605	606
	141	269	373	605	605
	141	269	373	605	605
	141	269	373	605	605
	141	269	373	604	604
	141	269	373	604	604
	141	269	373	604	604
	141	269	373	604	603
	141	268	373	603	603
	141	268	372	603	603
	141	268	372	603	602
	141	268	372	601	601
	141	268	372	600	601
	141	268	372	600	601
	141	267	372	600	600
	140	267	372	600	599
	140	267	371	599	599
	140	267	371	599	599
	140	266	371	598	598
	140	266	371	598	598
	140	266	371	598	598
	140	266	371	598	598
	140	266	371	597	598
	140	266	370	597	598
	140	265	370	597	597
	140	265	370	597	597
	140	265	370	597	597
	140	265	370	596	596
	140	265	370	596	596
	139	265	369	596	596
	139	265	369	595	595
	139	265	369	594	595
	139	265	369	594	594
	139	265	369	594	594
	139	265	369	594	594
	139	264	369	594	593
	139	264	369	593	593
	139	264	369	593	593
	139	264	368	593	593
	139	264	368	593	592
	139	264	368	593	592
	139	264	368	592	592
	139	264	368	592	591
	139	264	368	591	591
	139	264	368	590	590
	139	264	368	590	590
	139	264	368	590	590
	139	264	368	590	590
	139	264	367	590	589
	139	263	367	590	589
	138	263	367	589	589
	138	263	367	589	589
	138	263	367	589	589
	138	263	367	589	588
	138	262	367	588	588
	138	262	366	588	588
	138	261	366	588	588
	138	261	366	588	587
	137	261	366	588	587
	137	261	366	588	587
	137	261	366	587	587
	137	261	366	587	587
	137	261	366	587	586
	137	261	365	586	586
	137	261	365	586	586
	137	261	365	586	585
	137	261	364	585	585
	137	261	364	585	585
	137	261	364	584	584
	137	261	364	584	584
	137	261	364	584	584
	137	261	364	584	584
	136	261	364	584	584
	136	260	363	584	584
	136	260	363	583	583
	136	260	363	583	583
	136	260	363	583	583
	136	260	363	583	583
	136	260	363	582	583
	136	259	363	582	583
	136	259	362	582	582
	136	259	362	582	582
	136	259	362	582	582
	136	259	362	582	582
	136	259	362	582	582
	136	259	362	582	582
	136	259	362	581	581
	136	259	361	581	581
	136	259	361	581	581
	135	259	361	581	581
	135	259	361	580	580
	135	258	360	580	580
	135	258	360	580	580
	135	258	360	580	580
	135	258	360	580	580
	135	258	360	580	579
	135	258	360	579	579
	135	258	360	579	579
	135	258	360	578	579
	135	258	360	578	579
	135	258	360	578	578
	135	258	359	578	578
	135	257	359	578	578
	135	257	359	578	578
	135	257	359	578	577
	135	257	359	578	577
	135	257	359	577	577
	135	256	359	577	576
	135	256	358	576	576
	135	256	358	576	576
	135	256	358	576	576
	134	256	358	576	576
	134	256	358	576	576
	134	256	358	576	575
	134	256	358	576	575
	134	256	358	575	575
	134	256	357	574	574
	134	256	357	574	574
	134	255	357	574	574
	134	255	357	573	574
	134	255	357	573	573
	134	255	357	573	573
	134	255	357	573	572
	134	255	357	572	571
	134	255	356	572	571
	134	255	356	572	571
	134	255	356	571	570
	134	255	356	571	570
	134	254	356	570	570
	133	254	356	570	570
	133	254	356	570	570
	133	254	356	570	570
	133	254	355	570	570
	133	254	355	570	569
	133	254	355	569	569
	133	254	355	569	569
	133	254	355	569	569
	133	254	355	569	569
	133	254	354	568	569
	133	254	354	568	569
	133	253	354	568	568
	133	253	354	568	568
	133	253	354	568	568
	133	253	354	568	568
	133	253	353	568	568
	133	253	353	568	567
	133	253	353	567	566
	133	253	353	566	566
	133	253	353	566	566
	133	253	353	566	566
	133	253	353	565	566
	133	253	353	565	565
	133	253	353	565	565
	133	253	352	565	565
	133	252	352	565	565
	133	252	352	565	565
	133	252	352	564	564
	133	252	352	563	564
	132	252	352	563	564
	132	252	352	563	563
	132	252	351	563	563
	132	252	351	563	563
	132	252	351	563	563
	132	252	351	562	563
	132	252	351	562	562
	132	252	351	562	562
	132	251	351	561	562
	132	251	350	561	562
	132	251	350	560	561
	132	251	350	560	561
	132	251	349	560	560
	132	251	349	560	560
	132	251	349	560	560
	132	251	349	560	560
	132	250	349	560	560
	132	250	349	560	560
	132	250	349	560	559
	132	250	349	559	559
	131	250	349	559	559
	131	250	349	559	558
	131	250	348	558	558
	131	250	348	558	558
	131	250	348	558	558
	131	249	348	557	557
	131	249	348	557	557
	131	249	348	557	557
	131	249	348	557	556
	131	249	347	556	556
	131	249	347	556	556
	131	249	347	556	556
	131	249	346	556	556
	131	249	346	556	555
	131	249	346	555	555
	131	249	346	555	554
	131	248	346	555	554
	131	248	346	554	554
	131	248	346	554	553
	131	248	346	553	553
	131	248	346	553	553
	131	248	346	553	553
	130	248	345	552	552
	130	248	345	552	552
	130	247	345	552	552
	130	247	345	552	552
	130	247	345	551	551
	130	247	344	551	551
	130	247	344	551	551
	130	247	344	551	551
	130	247	344	550	551
	130	247	344	550	551
	130	247	344	550	550
	130	246	344	550	550
	130	246	343	549	550
	130	246	343	549	550
	130	246	343	549	549
	130	246	343	548	549
	130	246	343	548	549
	129	246	342	548	548
	129	246	342	548	548
	129	245	342	548	548
	129	245	342	548	548
	129	245	342	548	548
	129	245	342	548	547
	129	245	342	547	547
	129	245	342	547	547
	129	245	342	547	547
	129	245	342	547	546
	129	245	341	547	546
	129	245	341	547	546
	129	245	341	547	546
	129	245	341	546	546
	129	245	341	546	546
	129	244	341	546	546
	129	244	341	546	546
	129	244	341	546	546
	129	244	341	546	545
	129	244	340	546	545
	129	244	340	545	545
	129	244	340	545	545
	129	244	340	545	545
	128	244	340	545	545
	128	244	340	545	545
	128	244	340	544	544
	128	244	340	544	544
	128	244	340	544	544
	128	244	339	544	544
	128	244	339	544	544
	128	244	339	543	544
	128	244	339	543	543
	128	244	339	543	543
	128	244	339	543	543
	128	243	339	542	543
	128	243	339	542	543
	128	243	339	542	542
	128	243	338	541	541
	128	243	338	541	541
	127	243	338	541	541
	127	243	338	541	541
	127	242	338	540	541
	127	242	337	540	540
	127	242	337	540	540
	127	242	337	540	539
	127	242	337	540	539
	127	242	337	539	539
	127	242	337	539	539
	127	242	336	539	539
	127	242	336	539	539
	127	241	336	538	538
	127	241	336	538	538
	127	241	336	538	538
	127	241	336	538	538
	127	241	336	538	538
	127	241	335	538	538
	127	241	335	538	538
	127	241	335	538	538
	127	241	335	537	538
	127	241	335	537	537
	126	241	335	537	537
	126	241	335	536	536
	126	241	335	536	536
	126	240	335	536	536
	126	240	335	535	536
	126	240	334	535	536
	126	240	334	535	535
	126	240	334	535	535
	126	240	333	535	535
	126	240	333	535	535
	126	240	333	534	535
	126	240	333	534	534
	126	240	333	534	534
	126	240	333	534	534
	126	240	333	534	534
	126	240	332	534	534
	126	240	332	534	534
	126	240	332	534	534
	126	240	332	534	534
	126	240	332	534	534
	126	239	332	534	534
	126	239	332	533	533
	126	239	332	533	533
	125	239	332	533	533
	125	239	332	533	533
	125	239	331	532	533
	125	239	331	532	533
	125	238	331	532	532
	125	238	331	532	532
	125	238	331	532	532
	125	238	331	532	532
	125	238	331	531	532
	125	238	331	531	532
	125	238	330	531	532
	125	238	330	531	531
	125	237	330	531	531
	125	237	330	531	531
	125	237	329	531	531
	125	237	329	530	531
	125	237	329	530	531
	125	237	329	530	531
	125	237	329	530	531
	125	237	329	530	531
	125	237	329	530	531
	125	237	328	530	531
	125	237	328	530	531
	125	237	328	530	530
	125	237	328	529	530
	125	237	328	529	529
	125	237	328	529	529
	125	237	328	529	529
	125	237	328	529	529
	124	236	328	529	529
	124	236	328	529	529
	124	236	328	529	529
	124	236	327	528	528
	124	236	327	528	528
	124	236	327	528	528
	124	236	327	528	527
	124	235	327	527	527
	124	235	327	527	527
	124	235	327	526	527
	124	235	327	526	526
	124	235	327	525	526
	124	235	326	525	525
	124	235	326	525	525
	124	235	326	525	525
	124	235	326	525	525
	124	235	326	525	525
	124	235	325	525	524
	123	235	325	524	524
	123	235	325	524	524
	123	235	325	524	524
	123	235	325	524	524
	123	235	325	524	524
	123	235	324	524	524
	123	235	324	524	524
	123	235	324	524	523
	123	234	324	524	523
	123	234	324	523	523
	123	234	324	523	523
	123	234	324	523	523
	123	234	324	523	522
	123	234	324	522	522
	123	234	324	522	522
	123	234	324	522	522
	123	234	324	522	522
	123	234	324	522	522
	123	233	323	522	522
	123	233	323	521	521
	122	233	323	521	521
	122	233	323	521	521
	122	233	323	521	521
	122	233	323	521	520
	122	233	323	520	520
	122	233	323	520	520
	122	233	323	520	520
	122	233	322	520	520
	122	233	322	520	520
	122	232	322	520	519
	122	232	322	520	519
	122	232	322	520	519
	122	232	322	520	519
	122	232	322	520	519
	122	232	322	519	519
	122	232	322	519	519
	122	232	322	519	518
	122	232	322	518	518
	122	232	322	518	518
	122	232	322	518	518
	122	232	322	518	518
	122	232	321	518	518
	122	232	321	518	517
	122	232	321	518	517
	122	231	321	517	517
	122	231	321	517	517
	121	231	321	517	517
	121	231	321	517	517
	121	231	321	517	517
	121	231	321	517	517
	121	231	321	516	516
	121	231	321	516	516
	121	231	321	516	516
	121	231	320	516	516
	121	231	320	516	516
	121	231	320	516	516
	121	231	320	515	516
	121	230	320	515	516
	121	230	320	515	516
	121	230	320	515	516
	121	230	320	515	515
	121	230	319	515	515
	121	230	319	515	515
	121	230	319	514	514
	120	230	319	514	514
	120	229	319	514	514
	120	229	319	514	514
	120	229	319	514	514
	120	229	319	513	513
	120	229	319	513	513
	120	229	319	512	513
	120	229	319	512	513
	120	229	318	512	512
	120	229	318	512	512
	120	229	318	512	512
	120	229	318	512	512
	120	229	318	512	512
	120	229	318	512	512
	120	229	318	512	512
	120	229	318	511	511
	120	228	317	511	511
	120	228	317	511	511
	120	228	317	511	511
	120	228	317	511	511
	120	228	317	511	511
	120	228	317	511	511
	120	228	317	510	511
	120	228	317	510	510
	120	228	316	510	510
	119	228	316	510	510
	119	228	316	510	510
	119	228	316	510	510
	119	228	316	510	510
	119	228	316	510	510
	119	227	316	510	510
	119	227	316	510	510
	119	227	316	510	510
	119	227	316	509	509
	119	227	316	509	509
	119	227	316	509	509
	119	227	316	509	509
	119	227	316	509	509
	119	227	316	509	509
	119	227	316	509	509
	119	227	315	508	509
	119	227	315	508	508
	119	227	315	508	508
	119	227	315	508	508
	119	226	314	508	508
	119	226	314	508	508
	119	226	314	508	508
	119	226	314	508	508
	119	226	314	508	507
	119	226	314	508	507
	119	226	314	508	507
	119	226	314	507	507
	119	226	314	507	507
	119	226	314	507	507
	118	226	313	507	507
	118	226	313	507	507
	118	226	313	507	507
	118	226	313	507	507
	118	226	313	507	507
	118	225	313	507	507
	118	225	312	507	507
	118	225	312	507	506
	118	225	312	506	506
	118	225	312	506	506
	118	225	312	506	506
	118	225	312	506	506
	118	225	312	506	506
	118	225	312	506	506
	118	225	312	506	506
	118	225	312	506	505
	118	224	312	505	505
	118	224	312	505	505
	118	224	312	505	505
	118	224	311	505	505
	118	224	311	505	505
	118	224	311	505	505
	118	224	311	505	504
	118	224	311	504	504
	118	224	311	504	504
	118	224	311	504	504
	118	224	311	504	503
	118	224	311	503	503
	117	224	311	503	503
	117	224	311	503	503
	117	224	311	503	502
	117	224	311	503	502
	117	224	311	502	502
	117	223	310	502	502
	117	223	310	502	502
	117	223	310	502	502
	117	223	310	501	502
	117	223	310	501	501
	117	223	310	501	501
	117	223	310	501	501
	117	223	310	501	501
	117	223	310	501	501
	117	223	310	501	501
	117	223	310	501	501
	117	222	310	500	500
	117	222	310	500	500
	117	222	310	500	500
	117	222	310	500	500
	117	222	309	500	500
	117	222	309	500	500
	117	222	309	500	500
	117	222	309	500	500
	117	222	309	500	500
	117	222	309	499	500
	117	222	309	499	500
	117	222	309	499	500
	117	222	309	499	499
	117	222	308	499	499
	117	222	308	499	499
	116	222	308	499	499
	116	222	308	499	499
	116	222	308	499	499
	116	222	308	499	499
	116	221	308	499	499
	116	221	307	499	499
	116	221	307	499	499
	116	221	307	498	498
	116	221	307	498	498
	116	221	307	498	498
	116	221	307	498	498
	116	221	307	498	498
	116	221	307	498	497
	116	221	307	498	497
	116	221	306	497	497
	116	221	306	497	497
	116	220	306	497	497
	116	220	306	496	496
	116	220	306	496	496
	116	220	306	496	496
	116	220	306	496	496
	115	220	306	496	496
	115	220	306	496	496
	115	220	306	496	496
	115	220	306	496	496
	115	220	306	496	496
	115	220	305	496	495
	115	220	305	496	495
	115	220	305	495	495
	115	220	305	495	495
	115	220	305	495	495
	115	220	305	495	495
	115	220	305	495	495
	115	220	305	495	495
	115	220	305	495	495
	115	220	305	495	495
	115	219	305	495	495
	115	219	305	495	495
	115	219	305	494	493
	115	219	305	494	493
	115	219	304	493	493
	115	219	304	493	493
	115	219	304	493	493
	115	219	304	492	493
	115	219	304	492	493
	115	219	304	492	493
	115	219	304	492	492
	115	219	304	492	492
	115	219	304	492	492
	115	219	304	492	492
	115	219	303	492	492
	115	219	303	492	492
	115	219	303	492	492
	115	218	303	491	491
	115	218	303	491	491
	115	218	303	491	491
	115	218	303	491	491
	115	218	303	491	491
	115	218	303	491	490
	115	218	303	491	490
	114	218	303	490	490
	114	218	303	490	490
	114	218	303	490	490
	114	218	303	490	490
	114	218	303	490	490
	114	218	303	490	490
	114	218	302	489	490
	114	218	302	489	489
	114	218	302	489	489
	114	218	302	489	489
	114	217	302	489	489
	114	217	302	489	489
	114	217	302	489	489
	114	217	302	489	489
	114	217	302	488	488
	114	217	302	488	488
	114	217	302	488	488
	114	217	301	488	488
	114	217	301	488	488
	114	217	301	488	488
	114	217	301	488	488
	114	217	301	488	488
	114	217	301	488	488
	114	217	301	488	488
	114	217	301	488	488
	114	217	301	488	488
	114	217	301	488	488
	114	216	301	488	488
	113	216	301	487	487
	113	216	301	487	487
	113	216	300	487	487
	113	216	300	487	487
	113	216	300	487	487
	113	216	300	487	487
	113	216	300	487	487
	113	216	300	487	486
	113	216	300	486	486
	113	216	300	486	486
	113	216	300	486	486
	113	216	299	486	486
	113	216	299	486	485
	113	215	299	486	485
	113	215	299	486	485
	113	215	299	485	485
	113	215	299	485	484
	113	215	299	485	484
	113	215	299	485	484
	113	215	299	485	484
	113	215	299	485	484
	113	215	299	484	484
	113	215	299	484	484
	113	215	299	484	484
	113	215	299	484	484
	113	215	299	484	484
	113	215	299	484	483
	112	215	298	483	483
	112	215	298	483	483
	112	215	298	482	482
	112	215	298	482	482
	112	215	298	482	482
	112	214	298	482	482
	112	214	298	482	482
	112	214	298	482	482
	112	214	298	482	482
	112	214	298	482	482
	112	214	297	482	482
	112	214	297	481	481
	112	214	297	481	481
	112	214	297	481	481
	112	214	297	481	481
	112	214	297	481	481
	112	214	297	481	481
	112	214	297	481	481
	112	214	297	481	481
	112	213	297	481	481
	112	213	297	481	480
	112	213	297	481	480
	112	213	297	480	480
	112	213	296	480	480
	112	213	296	480	480
	112	213	296	480	480
	112	213	296	480	480
	112	213	296	480	480
	112	213	296	480	480
	112	213	296	479	480
	112	212	296	479	479
	112	212	296	479	479
	112	212	295	479	479
	112	212	295	479	479
	111	212	295	479	479
	111	212	295	479	478
	111	212	295	478	478
	111	212	295	478	478
	111	212	295	477	478
	111	212	295	477	477
	111	212	295	477	477
	111	212	295	477	477
	111	212	295	477	477
	111	212	295	477	477
	111	212	295	477	477
	111	212	295	476	477
	111	212	295	476	477
	111	212	295	476	477
	111	212	295	476	477
	111	212	295	476	477
	111	211	294	476	476
	111	211	294	476	476
	111	211	294	476	476
	111	211	294	476	476
	111	211	294	476	476
	111	211	294	476	476
	111	211	294	475	476
	111	211	294	475	475
	111	211	294	475	475
	111	211	293	475	475
	111	211	293	475	475
	111	211	293	475	475
	111	211	293	475	475
	111	211	293	475	475
	111	211	293	475	475
	111	210	293	475	474
	111	210	293	474	474
	110	210	293	474	474
	110	210	293	474	474
	110	210	293	474	474
	110	210	293	474	474
	110	210	293	474	474
	110	210	293	474	474
	110	210	292	474	473
	110	210	292	473	473
	110	210	292	473	473
	110	210	292	473	473
	110	210	292	473	472
	110	210	292	473	472
	110	210	292	473	472
	110	210	291	472	472
	110	210	291	472	472
	110	210	291	472	472
	110	209	291	472	472
	110	209	291	472	472
	110	209	291	472	472
	110	209	291	472	472
	110	209	291	472	472
	110	209	291	472	471
	110	209	291	472	471
	110	209	291	471	471
	110	209	291	471	471
	110	209	291	471	471
	110	209	291	471	471
	110	209	291	470	471
	110	209	291	470	470
	110	209	291	470	470
	110	209	291	470	470
	110	209	291	470	470
	110	209	291	470	470
	110	209	291	470	470
	110	209	290	470	470
	110	209	290	470	469
	110	209	290	469	469
	110	209	290	469	469
	110	208	290	469	469
	110	208	290	469	469
	110	208	290	469	469
	110	208	290	469	469
	110	208	290	468	469
	110	208	290	468	468
	110	208	290	468	468
	109	208	290	468	468
	109	208	290	468	468
	109	208	290	468	468
	109	208	290	468	468
	109	208	290	468	468
	109	208	289	468	468
	109	208	289	468	468
	109	208	289	468	468
	109	208	289	468	468
	109	208	289	468	468
	109	208	289	468	467
	109	208	289	467	467
	109	208	289	467	467
	109	208	289	467	467
	109	208	289	467	467
	109	208	289	466	466
	109	208	289	466	466
	109	208	289	466	466
	109	207	289	466	466
	109	207	288	466	466
	109	207	288	465	466
	109	207	288	465	466
	109	207	288	465	465
	109	207	288	465	465
	109	207	288	465	465
	109	207	288	465	465
	109	207	287	465	465
	109	207	287	465	465
	109	207	287	465	465
	109	207	287	465	465
	108	207	287	465	465
	108	207	287	465	464
	108	207	287	464	464
	108	207	287	464	464
	108	207	287	464	464
	108	206	287	464	464
	108	206	287	464	464
	108	206	287	464	464
	108	206	287	464	464
	108	206	287	464	464
	108	206	287	464	464
	108	206	286	464	464
	108	206	286	464	464
	108	206	286	464	464
	108	206	286	464	463
	108	206	286	463	463
	108	206	286	463	463
	108	206	286	463	463
	108	206	286	463	463
	108	206	286	463	463
	108	206	286	463	463
	108	206	286	463	463
	108	205	286	463	463
	108	205	286	463	463
	108	205	286	463	462
	108	205	285	462	462
	108	205	285	462	462
	108	205	285	462	462
	108	205	285	462	462
	108	205	285	462	462
	108	205	285	462	462
	108	205	285	462	462
	108	205	285	462	462
	108	205	285	462	462
	108	205	285	462	461
	108	205	285	462	461
	108	205	285	462	461
	108	205	285	461	461
	108	205	285	461	461
	108	205	285	461	461
	107	205	285	461	461
	107	205	285	461	461
	107	205	285	461	461
	107	205	285	461	461
	107	205	285	461	461
	107	205	285	460	461
	107	205	284	460	460
	107	205	284	460	460
	107	205	284	460	460
	107	205	284	460	460
	107	205	284	460	460
	107	205	284	460	460
	107	205	284	460	460
	107	205	284	460	460
	107	204	284	460	460
	107	204	284	460	460
	107	204	284	460	460
	107	204	284	460	459
	107	204	284	460	459
	107	204	284	459	459
	107	204	284	459	459
	107	204	283	459	459
	107	204	283	459	459
	107	204	283	459	459
	107	204	283	459	458
	107	204	283	459	458
	107	204	283	458	458
	107	204	283	458	458
	107	204	283	458	458
	107	204	283	458	458
	107	204	283	458	458
	107	204	283	458	458
	107	204	283	458	458
	107	204	283	458	458
	107	204	283	457	458
	107	204	283	457	458
	107	204	282	457	458
	107	204	282	457	458
	107	203	282	457	457
	107	203	282	457	457
	107	203	282	457	457
	107	203	282	457	456
	106	203	282	456	456
	106	203	282	456	456
	106	203	282	456	456
	106	203	282	456	456
	106	203	282	456	456
	106	203	282	456	456
	106	203	282	456	456
	106	203	282	456	456
	106	203	282	456	456
	106	203	282	456	456
	106	203	282	455	456
	106	203	282	455	456
	106	203	281	455	455
	106	203	281	455	455
	106	203	281	455	455
	106	203	281	455	455
	106	203	281	455	455
	106	203	281	455	455
	106	203	281	454	455
	106	203	281	454	455
	106	203	281	454	454
	106	203	281	454	454
	106	203	281	454	454
	106	203	281	454	454
	106	203	281	454	454
	106	203	281	454	454
	106	202	281	454	454
	106	202	281	454	453
	106	202	281	453	453
	106	202	281	453	453
	106	202	281	453	453
	106	202	280	453	453
	106	202	280	453	453
	106	202	280	453	453
	106	202	280	453	453
	106	202	280	453	453
	106	202	280	453	453
	106	202	280	452	453
	106	202	280	452	453
	106	202	280	452	453
	106	202	280	452	453
	106	202	280	452	452
	106	202	280	452	452
	106	202	280	452	452
	106	202	280	452	452
	106	202	280	452	452
	106	202	280	452	452
	106	202	280	452	452
	106	202	280	452	452
	106	202	280	451	452
	106	202	280	451	451
	106	202	280	451	451
	106	202	279	451	451
	106	202	279	451	451
	105	201	279	451	451
	105	201	279	451	451
	105	201	279	451	451
	105	201	279	451	451
	105	201	279	451	451
	105	201	279	451	451
	105	201	279	451	451
	105	201	279	451	451
	105	201	279	451	451
	105	201	279	450	451
	105	201	279	450	451
	105	201	279	450	451
	105	201	279	450	451
	105	201	279	450	450
	105	201	279	450	450
	105	201	279	450	450
	105	201	279	450	450
	105	201	279	450	450
	105	201	279	450	450
	105	201	279	450	450
	105	201	279	450	450
	105	201	279	450	449
	105	201	279	450	449
	105	201	278	450	449
	105	201	278	449	449
	105	201	278	449	449
	105	200	278	449	449
	105	200	278	449	449
	105	200	278	449	449
	105	200	278	449	449
	105	200	278	449	449
	105	200	278	449	449
	105	200	278	449	449
	105	200	278	449	449
	105	200	278	449	449
	105	200	278	448	449
	104	200	278	448	449
	104	200	277	448	449
	104	200	277	448	448
	104	200	277	448	448
	104	200	277	448	448
	104	200	277	448	448
	104	200	277	448	448
	104	200	277	448	448
	104	200	277	448	448
	104	200	277	448	448
	104	200	277	448	448
	104	200	277	448	448
	104	200	277	448	448
	104	200	277	448	448
	104	200	277	448	448
	104	200	277	447	447
	104	200	277	447	447
	104	200	277	447	447
	104	200	277	447	447
	104	200	276	447	447
	104	200	276	447	447
	104	199	276	447	447
	104	199	276	447	447
	104	199	276	447	446
	104	199	276	447	446
	104	199	276	447	446
	104	199	276	447	446
	104	199	276	446	446
	104	199	276	446	446
	104	199	276	446	446
	104	199	276	446	446
	104	199	276	446	446
	104	199	276	446	446
	104	199	276	446	446
	104	199	276	446	446
	104	199	276	445	446
	104	199	276	445	446
	104	199	275	445	445
	104	199	275	445	445
	104	199	275	445	445
	104	199	275	445	445
	104	199	275	445	445
	104	199	275	445	445
	104	199	275	445	445
	104	199	275	445	445
	104	198	275	444	444
	104	198	275	444	444
	104	198	275	444	444
	104	198	275	444	444
	104	198	275	444	444
	104	198	275	444	444
	104	198	275	444	444
	104	198	275	444	444
	104	198	275	444	444
	104	198	275	443	444
	104	198	275	443	444
	104	198	275	443	444
	104	198	275	443	443
	103	198	275	443	443
	103	198	275	443	443
	103	198	275	443	443
	103	198	274	443	442
	103	198	274	443	442
	103	198	274	442	442
	103	198	274	442	442
	103	198	274	442	442
	103	198	274	442	442
	103	197	274	442	442
	103	197	274	442	442
	103	197	274	442	442
	103	197	274	442	442
	103	197	274	442	442
	103	197	274	442	441
	103	197	274	441	441
	103	197	273	441	441
	103	197	273	441	441
	103	197	273	441	441
	103	197	273	441	441
	103	197	273	441	441
	103	197	273	441	441
	103	197	273	441	440
	103	197	273	441	440
	103	197	273	441	440
	103	197	273	441	440
	103	197	273	440	440
	103	197	273	440	440
	103	197	273	440	440
	103	197	273	440	440
	103	197	273	440	440
	103	197	273	440	440
	103	197	273	440	440
	103	197	273	440	440
	103	197	273	440	440
	103	197	273	440	440
	103	197	273	440	440
	103	197	273	440	440
	103	197	272	440	439
	103	196	272	439	439
	103	196	272	439	439
	103	196	272	439	439
	103	196	272	439	439
	103	196	272	439	439
	102	196	272	439	439
	102	196	272	439	439
	102	196	272	439	439
	102	196	272	439	439
	102	196	272	439	439
	102	196	272	439	439
	102	196	272	439	439
	102	196	272	439	439
	102	196	272	439	439
	102	196	272	439	439
	102	196	271	439	439
	102	196	271	438	439
	102	196	271	438	439
	102	196	271	438	439
	102	196	271	438	439
	102	195	271	438	438
	102	195	271	438	438
	102	195	271	438	438
	102	195	271	438	438
	102	195	271	438	438
	102	195	271	438	438
	102	195	271	438	438
	102	195	271	438	438
	102	195	271	438	438
	102	195	271	438	438
	102	195	271	437	438
	102	195	271	437	437
	102	195	271	437	437
	102	195	271	437	437
	102	195	271	437	437
	102	195	271	437	437
	102	195	271	437	437
	102	195	271	437	437
	102	195	271	437	437
	102	195	270	437	437
	102	195	270	437	437
	102	194	270	436	437
	102	194	270	436	437
	101	194	270	436	436
	101	194	270	436	436
	101	194	270	436	436
	101	194	270	436	436
	101	194	270	436	436
	101	194	270	436	436
	101	194	270	436	436
	101	194	270	436	436
	101	194	270	436	435
	101	194	270	436	435
	101	194	270	436	435
	101	194	269	436	435
	101	194	269	435	435
	101	194	269	435	435
	101	194	269	435	435
	101	194	269	435	435
	101	194	269	435	435
	101	194	269	435	435
	101	193	269	435	435
	101	193	269	435	435
	101	193	269	435	435
	101	193	269	435	434
	101	193	269	435	434
	101	193	269	435	434
	101	193	269	434	434
	101	193	269	434	434
	101	193	269	434	434
	101	193	269	434	434
	101	193	269	434	434
	101	193	269	434	434
	101	193	269	434	434
	101	193	269	434	433
	101	193	269	434	433
	101	193	269	433	433
	101	193	269	433	433
	101	193	269	433	433
	101	193	269	433	433
	101	193	269	433	433
	101	193	269	433	433
	101	193	269	433	433
	101	193	268	433	433
	101	193	268	433	433
	101	193	268	433	433
	101	193	268	433	433
	101	193	268	433	433
	101	193	268	433	433
	101	193	268	433	433
	101	192	268	433	432
	101	192	268	433	432
	101	192	268	432	432
	101	192	268	432	432
	101	192	268	432	432
	101	192	268	432	432
	101	192	268	432	432
	101	192	268	432	432
	101	192	268	432	432
	100	192	268	432	432
	100	192	267	432	432
	100	192	267	432	432
	100	192	267	432	432
	100	192	267	432	432
	100	192	267	432	432
	100	192	267	431	432
	100	192	267	431	431
	100	192	267	431	431
	100	192	267	431	431
	100	192	266	431	431
	100	192	266	431	431
	100	192	266	431	431
	100	192	266	431	431
	100	191	266	431	431
	100	191	266	431	431
	100	191	266	430	430
	100	191	266	430	430
	100	191	266	430	430
	100	191	266	430	430
	100	191	266	430	430
	100	191	266	430	430
	100	191	266	430	430
	100	191	266	430	430
	100	191	266	430	430
	100	191	266	429	430
	100	191	266	429	429
	100	191	265	429	429
	100	191	265	429	429
	100	191	265	429	429
	100	191	265	429	429
	100	191	265	429	429
	100	191	265	429	429
	100	191	265	429	429
	100	191	265	429	429
	100	191	265	429	429
	100	191	265	429	429
	100	191	265	429	429
	100	191	265	429	429
	100	191	265	429	428
	100	191	265	429	428
	100	191	265	428	428
	100	191	265	428	428
	100	191	265	428	428
	100	191	265	428	428
	100	191	264	428	428
	100	191	264	428	428
	100	191	264	428	428
	100	191	264	428	427
	100	190	264	428	427
	100	190	264	428	427
	100	190	264	427	427
	100	190	264	427	427
	100	190	264	427	427
	100	190	264	427	427
	100	190	264	427	427
	99	190	264	427	427
	99	190	264	427	427
	99	190	264	427	427
	99	190	264	427	427
	99	190	264	427	427
	99	190	264	427	427
	99	190	264	427	427
	99	190	264	427	427
	99	190	264	427	427
	99	190	264	427	427
	99	190	264	427	427
	99	190	264	427	427
	99	190	264	427	426
	99	190	264	426	426
	99	190	263	426	426
	99	190	263	426	426
	99	190	263	426	426
	99	190	263	426	426
	99	190	263	426	426
[truncated: 62,386 more rows]

## Sheet: Figure 1-figure supplement 1E
Median of gene
Percentage of data	20% data	40% data	60% data	80% data	100% data
Data of exponential period E. coli	568	849	1034	1359	1359		Figure 1-figure supplement 1E. Median of gene per cell of exponential period E. coli
	551	820	1021	1321	1321		Percentage of data	Top 1000 cells	Top 5000 cells	Top 10000 cells
	366	572	740	998	998		0% data	0	0	0
	342	531	685	945	945		20% data	124.979	78.8422	62.3379
	338	528	684	926	926		40% data	210.21	135.836	108.66
	328	526	664	926	926		60% data	272.295	178.079	143.214
	323	507	633	876	876		80% data	392.198	261.542	212.336
	318	506	625	867	867		100% data	392.198	261.542	212.343
	298	495	615	859	859
	293	474	603	852	852
	291	470	600	824	824
	287	467	599	821	821
	277	456	595	818	818
	271	448	593	815	815
	271	438	551	777	777
	263	418	538	743	743
	256	414	523	718	718
	254	412	512	716	716
	252	412	509	714	714
	251	400	509	714	714
	242	395	507	710	710
	239	387	505	707	707
	238	383	500	700	700
	235	381	496	686	686
	233	378	485	678	678
	233	376	480	678	678
	224	367	476	672	672
	223	367	474	669	669
	222	356	459	657	657
	222	355	456	637	637
	219	353	454	632	632
	218	350	454	630	630
	218	350	452	627	627
	214	349	449	626	626
	214	348	449	624	624
	213	348	448	624	624
	213	348	446	623	623
	211	347	443	622	622
	208	347	439	621	621
	208	346	435	621	621
	208	343	434	620	620
	207	339	433	618	618
	205	339	432	617	617
	205	339	430	611	611
	205	337	430	608	608
	204	336	427	606	606
	204	335	426	606	606
	204	333	422	604	604
	201	333	421	595	595
	200	332	421	593	593
	199	332	420	589	589
	198	329	419	589	589
	196	325	419	588	588
	196	325	418	586	586
	195	324	416	586	586
	195	318	412	581	581
	193	317	408	578	578
	193	316	407	575	575
	193	314	406	574	574
	192	311	402	569	569
	191	311	401	569	569
	190	310	398	564	564
	189	309	393	560	560
	188	305	392	560	560
	188	305	390	559	559
	186	304	390	559	559
	185	302	389	558	558
	185	301	387	552	552
	185	301	386	549	549
	185	301	385	549	549
	184	299	385	549	549
	184	297	384	545	545
	183	296	379	544	544
	183	296	378	544	544
	181	296	378	542	542
	181	295	377	541	541
	181	295	377	538	538
	180	295	375	538	538
	178	293	374	535	535
	178	291	372	534	534
	178	290	372	534	534
	177	289	371	533	533
	176	289	371	527	527
	176	287	370	527	527
	176	286	370	526	526
	175	286	369	526	526
	174	286	368	526	526
	174	285	368	522	522
	173	285	368	521	521
	173	285	368	520	520
	172	283	368	518	518
	171	283	367	516	516
	171	282	366	516	516
	171	282	363	515	515
	170	282	363	514	514
	169	282	362	513	513
	168	281	362	513	513
	168	281	362	512	512
	167	281	361	511	511
	166	281	361	509	509
	166	281	361	508	508
	166	281	359	507	507
	166	281	358	507	507
	166	280	357	506	506
	165	280	357	505	505
	165	279	355	505	505
	165	278	355	504	504
	165	277	355	501	501
	165	277	354	500	500
	165	276	352	499	499
	164	276	351	499	499
	164	274	351	497	497
	163	274	351	496	496
	163	273	351	495	495
	163	273	348	495	495
	163	272	348	494	494
	163	271	348	491	491
	163	270	347	491	491
	163	268	347	491	491
	162	267	346	490	490
	162	267	346	490	490
	162	266	345	489	489
	161	266	345	488	488
	161	266	344	488	488
	161	265	343	486	486
	161	265	342	485	485
	161	264	341	485	485
	160	264	339	485	485
	159	263	339	485	485
	159	262	337	484	484
	158	262	335	484	484
	158	262	335	483	483
	157	261	335	483	483
	156	261	334	483	483
	156	261	334	482	482
	156	261	334	481	481
	156	261	333	479	479
	155	261	333	478	478
	155	260	333	477	477
	155	258	332	477	477
	155	258	332	475	475
	155	257	331	475	475
	154	256	330	474	474
	154	256	330	473	473
	154	256	329	472	472
	154	256	329	472	472
	153	255	329	471	471
	153	254	329	471	471
	153	253	328	470	470
	153	253	327	469	469
	153	253	327	467	467
	153	253	327	467	467
	152	253	327	467	467
	152	253	326	464	464
	152	252	326	464	464
	151	252	325	464	464
	151	252	324	463	463
	151	251	324	462	462
	151	251	324	461	461
	151	251	324	460	460
	151	250	323	460	460
	151	250	323	460	460
	150	249	322	459	459
	150	249	322	458	458
	150	249	322	457	457
	150	249	322	457	457
	150	249	320	457	457
	149	248	320	456	456
	149	248	320	456	456
	149	248	320	456	456
	149	247	319	456	456
	149	247	317	455	455
	148	247	317	454	454
	148	246	316	454	454
	147	246	316	453	453
	147	246	316	453	453
	147	245	316	452	452
	146	245	315	452	452
	146	245	315	450	450
	146	245	315	448	448
	146	245	314	448	448
	146	245	314	448	448
	146	245	313	448	448
	145	244	313	447	447
	145	244	313	447	447
	145	244	312	447	447
	145	243	312	445	445
	144	243	312	443	443
	144	243	312	443	443
	144	242	312	442	442
	144	242	311	442	442
	144	241	311	442	442
	143	241	310	441	441
	143	241	310	440	440
	143	241	310	440	440
	143	240	310	440	440
	142	239	309	439	439
	142	239	308	438	438
	142	239	308	437	437
	142	239	308	437	437
	142	239	307	437	437
	142	239	307	436	436
	142	239	306	436	436
	142	238	306	436	436
	142	238	305	435	435
	141	238	305	435	435
	141	238	305	435	435
	141	238	305	435	435
	141	236	305	434	434
	140	236	305	434	434
	140	236	304	434	434
	140	235	304	434	434
	140	235	304	433	433
	139	235	302	432	432
	139	235	302	432	432
	139	234	302	432	432
	138	234	302	431	431
	138	233	301	431	431
	138	233	300	430	430
	138	233	300	430	430
	138	233	300	429	429
	137	232	299	428	428
	137	232	297	428	428
	137	232	296	428	428
	137	232	296	428	428
	137	230	296	426	426
	137	230	296	426	426
	137	230	295	425	425
	136	230	295	425	425
	136	230	295	425	425
	136	229	294	424	424
	136	229	294	423	423
	136	229	294	423	423
	136	229	294	422	422
	136	229	294	421	421
	136	228	294	421	421
	136	228	294	420	420
	136	228	293	420	420
	136	228	293	420	420
	135	228	293	419	419
	135	228	292	418	418
	135	228	292	418	418
	135	228	292	418	418
	134	227	292	418	418
	134	227	290	417	417
	134	227	289	417	417
	134	227	289	417	417
	134	226	289	417	417
	134	226	289	416	416
	134	226	288	415	415
	134	226	288	415	415
	134	225	288	415	415
	134	225	288	415	415
	134	225	288	414	414
	133	224	287	414	414
	133	224	287	412	412
	133	224	287	412	412
	133	224	287	411	411
	133	223	286	411	411
	133	223	286	411	411
	133	223	286	410	410
	133	222	286	410	410
	132	221	286	409	409
	132	221	285	409	409
	132	221	285	409	409
	132	221	285	408	408
	132	220	285	408	408
	131	220	284	408	408
	131	220	284	407	407
	131	220	284	407	407
	131	220	284	406	406
	131	219	284	406	406
	131	219	284	406	406
	131	218	283	406	406
	131	218	283	406	406
	131	218	283	405	405
	131	218	283	405	405
	130	218	283	404	404
	130	218	283	404	404
	130	217	282	404	404
	130	217	282	404	404
	129	217	282	404	404
	129	217	282	403	403
	129	216	282	403	403
	129	216	282	403	403
	129	216	282	403	403
	129	216	281	403	403
	129	216	281	402	402
	129	216	281	402	402
	129	216	280	401	401
	129	216	280	401	401
	129	216	280	400	400
	129	215	280	400	400
	128	215	279	400	400
	128	215	279	399	399
	128	215	279	398	398
	128	215	279	398	398
	128	215	278	398	398
	128	215	278	398	398
	128	214	278	398	398
	128	214	278	398	398
	128	214	278	397	397
	128	214	277	397	397
	127	214	277	397	397
	127	214	277	397	397
	127	214	277	397	397
	127	214	277	396	396
	127	214	277	396	396
	127	214	277	396	396
	127	214	276	396	396
	127	214	276	396	396
	127	213	276	395	395
	127	213	276	395	395
	127	213	276	395	395
	127	213	276	395	395
	127	212	276	394	394
	126	212	275	394	394
	126	212	275	394	394
	126	212	274	394	394
	126	212	274	393	393
	126	212	274	393	393
	126	212	274	393	393
	126	211	273	393	393
	126	211	273	393	393
	126	211	273	392	392
	125	211	273	392	392
	125	211	273	392	392
	125	210	272	391	391
	125	210	272	391	391
	125	209	272	391	391
	124	209	272	391	391
	124	209	272	391	391
	124	209	271	390	390
	124	208	271	390	390
	124	208	271	390	390
	124	208	271	390	390
	124	207	271	389	389
	124	207	271	389	389
	124	207	270	389	389
	123	206	270	388	388
	123	206	270	388	388
	123	206	270	388	388
	123	206	270	388	388
	123	206	270	387	387
	123	206	270	387	387
	123	206	269	387	387
	123	206	269	387	387
	123	206	269	387	387
	123	206	269	387	387
	123	206	269	386	386
	122	206	269	386	386
	122	206	269	386	386
	122	205	269	386	386
	122	205	269	386	386
	122	205	268	386	386
	122	205	267	385	385
	122	205	267	385	385
	122	205	267	384	384
	122	205	267	384	384
	122	204	267	384	384
	121	204	266	384	384
	121	204	266	384	384
	121	204	266	383	383
	121	204	265	383	383
	121	204	265	383	383
	121	203	265	383	383
	121	203	265	383	383
	121	203	264	383	383
	121	203	264	382	382
	121	203	264	382	382
	121	202	264	382	382
	121	202	264	382	382
	120	202	264	381	381
	120	202	263	381	381
	120	202	263	381	381
	120	202	263	381	381
	120	202	263	381	381
	120	201	263	381	381
	120	201	263	381	381
	120	201	263	381	381
	120	201	263	380	380
	120	201	263	380	380
	120	201	263	380	380
	120	201	262	379	379
	120	201	262	379	379
	120	201	262	379	379
	119	200	262	378	378
	119	200	262	378	378
	119	200	262	378	378
	119	200	262	378	378
	119	200	261	378	378
	119	200	261	378	378
	119	200	261	378	378
	119	199	261	378	378
	119	199	260	377	377
	119	199	260	376	376
	119	199	260	376	376
	119	199	260	376	376
	119	199	259	376	376
	119	199	259	376	376
	119	198	259	376	376
	119	198	259	376	376
	118	198	259	375	375
	118	198	259	375	375
	118	198	258	375	375
	118	198	258	375	375
	118	198	258	375	375
	118	198	258	375	375
	118	198	258	375	375
	118	198	257	375	375
	118	198	257	374	374
	118	198	257	374	374
	117	198	257	373	373
	117	198	257	373	373
	117	198	257	373	373
	117	198	257	373	373
	117	198	257	373	373
	117	197	257	373	373
	117	197	256	373	373
	117	197	256	373	373
	117	197	256	373	373
	117	197	256	372	372
	117	197	256	372	372
	117	197	256	372	372
	117	197	255	372	372
	117	197	255	372	372
	117	197	255	372	372
	116	197	255	372	372
	116	197	255	372	372
	116	196	255	372	372
	116	196	255	371	371
	116	196	255	371	371
	116	196	255	371	371
	116	196	255	370	370
	116	196	254	370	370
	116	196	254	370	370
	116	196	254	370	370
	116	196	254	370	370
	116	196	254	370	370
	116	196	254	370	370
	116	195	254	370	370
	115	195	254	369	369
	115	195	254	369	369
	115	195	254	369	369
	115	195	254	369	369
	115	195	253	369	369
	115	195	253	369	369
	115	195	253	369	369
	115	195	253	369	369
	115	194	253	368	368
	115	194	253	368	368
	115	194	253	368	368
	114	194	253	368	368
	114	194	253	368	368
	114	194	253	368	368
	114	194	253	368	368
	114	194	252	367	367
	114	194	252	367	367
	114	193	252	367	367
	114	193	252	367	367
	114	193	252	367	367
	114	193	252	367	367
	114	193	251	367	367
	114	193	251	367	367
	114	193	251	367	367
	114	193	251	367	367
	114	193	251	367	367
	114	193	251	366	366
	113	193	251	366	366
	113	193	251	366	366
	113	193	251	366	366
	113	193	251	366	366
	113	193	251	366	366
	113	192	250	366	366
	113	192	250	366	366
	113	192	250	366	366
	113	192	250	365	365
	113	192	249	365	365
	113	192	249	365	365
	113	192	249	365	365
	113	192	249	365	365
	113	192	249	365	365
	113	192	249	365	365
	113	192	249	365	365
	113	192	249	364	364
	113	192	248	364	364
	113	192	248	364	364
	113	192	248	364	364
	113	191	248	364	364
	113	191	248	363	363
	112	191	248	363	363
	112	191	248	363	363
	112	191	248	363	363
	112	191	248	363	363
	112	191	248	363	363
	112	191	248	363	363
	112	191	247	363	363
	112	190	247	363	363
	112	190	247	362	362
	112	190	247	362	362
	112	190	247	362	362
	112	190	247	362	362
	112	190	247	361	361
	112	190	247	361	361
	112	190	247	361	361
	112	190	247	361	361
	112	190	246	361	361
	112	190	246	361	361
	111	190	246	361	361
	111	190	246	360	360
	111	189	246	360	360
	111	189	246	359	359
	111	189	246	359	359
	111	189	246	359	359
	111	189	246	359	359
	111	189	245	359	359
	111	189	245	359	359
	111	189	245	359	359
	111	189	245	358	358
	111	189	245	358	358
	111	188	245	358	358
	111	188	245	358	358
	111	188	245	358	358
	111	188	245	358	358
	111	188	245	358	358
	111	188	245	357	357
	110	188	245	357	357
	110	188	245	357	357
	110	188	244	357	357
	110	188	244	356	356
	110	188	244	356	356
	110	188	244	355	355
	110	188	244	355	355
	110	188	244	355	355
	110	188	244	355	355
	110	188	244	355	355
	110	187	244	355	355
	110	187	244	355	355
	110	187	244	355	355
	110	187	244	355	355
	110	187	243	355	355
	110	187	243	354	354
	110	187	243	354	354
	110	187	243	354	354
	110	187	243	354	354
	109	187	243	354	354
	109	187	243	354	354
	109	187	243	354	354
	109	187	243	354	354
	109	187	243	353	353
	109	187	243	353	353
	109	186	243	353	353
	109	186	243	352	352
	109	186	242	352	352
	109	186	242	352	352
	109	186	242	352	352
	109	186	242	352	352
	109	186	242	352	352
	109	186	242	351	351
	109	186	242	351	351
	109	186	242	351	351
	108	186	242	351	351
	108	186	242	351	351
	108	186	242	351	351
	108	186	242	350	350
	108	185	242	350	350
	108	185	242	350	350
	108	185	241	349	349
	108	185	241	349	349
	108	185	241	349	349
	108	185	241	348	348
	108	185	241	348	348
	108	185	241	348	348
	108	185	241	348	348
	108	185	240	348	348
	108	184	240	348	348
	108	184	240	347	347
	108	184	240	347	347
	108	184	240	347	347
	108	184	240	347	347
	108	184	240	347	347
	108	184	239	347	347
	108	184	239	347	347
	108	184	239	347	347
	108	184	239	347	347
	108	183	239	346	346
	107	183	239	346	346
	107	183	238	346	346
	107	183	238	346	346
	107	183	238	346	346
	107	183	238	346	346
	107	183	238	346	346
	107	183	238	346	346
	107	183	238	346	346
	107	183	238	345	345
	107	183	238	345	345
	107	183	238	345	345
	107	183	237	345	345
	107	183	237	345	345
	107	183	237	345	345
	107	183	237	345	345
	107	182	237	345	345
	107	182	237	345	345
	107	182	237	344	344
	107	182	237	344	344
	107	182	236	344	344
	107	182	236	344	344
	107	182	236	344	344
	107	182	236	344	344
	107	182	236	344	344
	107	182	236	344	344
	106	182	236	343	343
	106	182	236	343	343
	106	182	236	343	343
	106	182	236	343	343
	106	182	236	343	343
	106	182	236	342	342
	106	182	236	342	342
	106	182	236	342	342
	106	181	235	342	342
	106	181	235	342	342
	106	181	235	341	341
	106	181	235	341	341
	106	181	235	341	341
	106	181	235	341	341
	106	181	235	341	341
	106	181	235	341	341
	105	181	234	341	341
	105	181	234	341	341
	105	181	234	341	341
	105	181	234	341	341
	105	181	234	341	341
	105	181	234	341	341
	105	180	234	341	341
	105	180	234	341	341
	105	180	234	341	341
	105	180	233	341	341
	105	180	233	341	341
	105	180	233	341	341
	105	180	233	340	340
	105	179	233	340	340
	105	179	233	340	340
	105	179	233	340	340
	104	179	233	339	339
	104	179	233	339	339
	104	179	233	339	339
	104	179	233	339	339
	104	179	233	339	339
	104	179	233	339	339
	104	178	232	339	339
	104	178	232	338	338
	104	178	232	338	338
	104	178	232	338	338
	104	178	232	338	338
	104	178	232	338	338
	104	178	232	338	338
	104	178	232	338	338
	104	178	232	337	337
	104	178	232	337	337
	103	178	231	337	337
	103	178	231	337	337
	103	178	231	337	337
	103	178	231	337	337
	103	178	231	336	336
	103	178	231	336	336
	103	177	231	336	336
	103	177	231	336	336
	103	177	230	335	335
	103	177	230	335	335
	103	177	230	335	335
	103	177	230	335	335
	103	177	230	335	335
	103	177	230	335	335
	103	177	230	335	335
	103	176	230	335	335
	103	176	230	335	335
	103	176	230	335	335
	103	176	230	335	335
	103	176	230	335	335
	103	176	230	335	335
	103	176	229	335	335
	103	176	229	335	335
	103	176	229	334	334
	103	176	229	334	334
	103	176	229	334	334
	103	176	229	334	334
	103	176	229	334	334
	102	176	229	333	333
	102	176	228	333	333
	102	176	228	333	333
	102	176	228	333	333
	102	175	228	333	333
	102	175	228	333	333
	102	175	228	333	333
	102	175	228	333	333
	102	175	228	333	333
	102	175	228	333	333
	102	175	228	332	332
	102	175	228	332	332
	102	175	228	331	331
	102	175	228	331	331
	102	175	228	331	331
	102	175	228	331	331
	102	175	227	331	331
	102	175	227	331	331
	102	175	227	331	331
	102	175	227	331	331
	102	174	227	330	330
	102	174	227	330	330
	102	174	227	330	330
	102	174	227	330	330
	101	174	227	330	330
	101	174	227	330	330
	101	174	227	330	330
	101	174	227	330	330
	101	174	227	330	330
	101	174	227	330	330
	101	173	227	330	330
	101	173	227	329	329
	101	173	227	329	329
	101	173	227	329	329
	101	173	227	329	329
	101	173	227	329	329
	101	173	226	329	329
	101	173	226	329	329
	101	173	226	329	329
	101	173	226	329	329
	101	173	226	328	328
	101	173	226	328	328
	101	173	226	328	328
	101	173	226	328	328
	101	173	226	328	328
	100	173	226	328	328
	100	173	225	328	328
	100	173	225	328	328
	100	172	225	328	328
	100	172	225	328	328
	100	172	225	328	328
	100	172	225	328	328
	100	172	225	328	328
	100	172	225	327	327
	100	172	225	327	327
	100	172	225	327	327
	100	172	225	327	327
	100	172	225	327	327
	100	172	225	327	327
	100	172	225	327	327
	100	172	225	327	327
	100	172	225	326	326
	100	171	225	326	326
	100	171	225	326	326
	100	171	224	326	326
	100	171	224	326	326
	100	171	224	326	326
	100	171	224	326	326
	100	171	224	326	326
	100	171	224	326	326
	100	171	224	326	326
	100	171	223	326	326
	100	171	223	325	325
	100	171	223	325	325
	100	171	223	325	325
	100	170	223	325	325
	100	170	223	325	325
	99	170	223	325	325
	99	170	223	325	325
	99	170	223	325	325
	99	170	223	325	325
	99	170	222	325	325
	99	170	222	325	325
	99	170	222	325	325
	99	170	222	324	324
	99	170	222	324	324
	99	170	222	324	324
	99	170	222	324	324
	99	170	222	324	324
	99	170	222	324	324
	99	170	222	323	323
	99	170	222	323	323
	99	170	222	323	323
	99	170	221	323	323
	99	169	221	323	323
	99	169	221	323	323
	99	169	221	323	323
	99	169	221	323	323
	99	169	221	323	323
	99	169	221	323	323
	99	169	221	323	323
	99	169	221	323	323
	99	169	221	323	323
	99	169	221	323	323
	99	169	221	322	322
	99	169	221	322	322
	99	169	220	322	322
	99	169	220	322	322
	99	169	220	322	322
	99	169	220	322	322
	99	169	220	322	322
	99	169	220	322	322
	99	169	220	322	322
	98	169	220	321	321
	98	169	220	321	321
	98	169	220	321	321
	98	169	220	321	321
	98	169	220	321	321
	98	169	220	321	321
	98	169	220	321	321
	98	169	220	321	321
	98	169	220	321	321
	98	169	220	321	321
	98	169	219	321	321
	98	168	219	321	321
	98	168	219	321	321
	98	168	219	321	321
	98	168	219	321	321
	98	168	219	321	321
	98	168	219	321	321
	98	168	219	320	320
	98	168	219	320	320
	98	168	219	320	320
	98	168	219	320	320
	98	168	219	320	320
	98	168	219	320	320
	98	168	219	320	320
	98	168	219	320	320
	98	168	218	320	320
	98	168	218	320	320
	98	168	218	320	320
	98	168	218	320	320
	98	168	218	320	320
	98	168	218	320	320
	98	168	218	320	320
	98	168	218	320	320
	98	168	218	319	319
	98	168	218	319	319
	98	167	218	319	319
	97	167	218	319	319
	97	167	218	319	319
	97	167	217	319	319
	97	167	217	319	319
	97	167	217	319	319
	97	167	217	319	319
	97	167	217	319	319
	97	167	217	319	319
	97	167	217	319	319
	97	167	217	318	318
	97	167	217	318	318
	97	167	217	318	318
	97	167	217	318	318
	97	166	217	318	318
	97	166	216	318	318
	97	166	216	318	318
	97	166	216	318	318
	97	166	216	318	318
	97	166	216	318	318
	97	166	216	318	318
	97	166	216	318	318
	97	166	216	317	317
	97	166	216	317	317
	97	166	216	317	317
	97	166	216	317	317
	97	165	216	317	317
	97	165	216	317	317
	97	165	216	317	317
	97	165	216	316	316
	97	165	216	316	316
	97	165	216	316	316
	97	165	215	316	316
	97	165	215	316	316
	97	165	215	316	316
	97	165	215	316	316
	96	165	215	316	316
	96	165	215	315	315
	96	165	215	315	315
	96	165	215	315	315
	96	165	215	315	315
	96	165	215	314	314
	96	164	214	314	314
	96	164	214	314	314
	96	164	214	314	314
	96	164	214	314	314
	96	164	214	314	314
	96	164	214	314	314
	96	164	214	314	314
	96	164	214	313	313
	96	164	214	313	313
	96	164	214	313	313
	96	164	214	313	313
	96	164	214	313	313
	96	164	214	313	313
	96	164	214	313	313
	96	164	214	313	313
	96	164	214	313	313
	96	164	214	313	313
	96	164	214	312	312
	96	164	214	312	312
	96	164	214	312	312
	96	164	214	312	312
	96	164	214	312	312
	96	163	213	312	312
	96	163	213	311	311
	96	163	213	311	311
	96	163	213	311	311
	96	163	213	311	311
	95	163	213	311	311
	95	163	213	311	311
	95	163	213	311	311
	95	163	213	311	311
	95	163	213	311	311
	95	163	213	311	311
	95	163	213	311	311
	95	163	213	310	310
	95	163	213	310	310
	95	163	212	310	310
	95	163	212	310	310
	95	162	212	310	310
	95	162	212	310	310
	95	162	212	310	310
	95	162	212	310	310
	95	162	212	310	310
	95	162	212	310	310
	95	162	212	310	310
	95	162	212	309	309
	95	162	212	309	309
	95	162	212	309	309
	95	162	212	309	309
	95	162	212	309	309
	95	162	212	309	309
	95	162	212	309	309
	95	162	212	309	309
	95	162	212	309	309
	95	161	212	309	309
	95	161	212	309	309
	95	161	211	309	309
	94	161	211	308	308
	94	161	211	308	308
	94	161	211	308	308
	94	161	211	308	308
	94	161	211	308	308
	94	161	211	308	308
	94	161	211	308	308
	94	161	211	308	308
	94	161	211	308	308
	94	161	211	308	308
	94	160	211	308	308
	94	160	211	307	307
	94	160	211	307	307
	94	160	211	307	307
	94	160	211	307	307
	94	160	211	307	307
	94	160	211	307	307
	94	160	211	307	307
	94	160	211	307	307
	94	160	211	307	307
	94	160	211	307	307
	94	160	211	307	307
	94	160	211	307	307
	94	160	211	306	306
	94	160	210	306	306
	94	160	210	306	306
	94	160	210	306	306
	94	160	210	306	306
	94	160	210	306	306
	94	159	210	306	306
	94	159	210	306	306
	94	159	210	305	305
	94	159	210	305	305
	94	159	210	305	305
	94	159	210	305	305
	94	159	210	305	305
	94	159	209	305	305
	93	159	209	305	305
	93	159	209	305	305
	93	159	209	305	305
	93	159	209	305	305
	93	159	209	305	305
	93	159	209	304	304
	93	159	209	304	304
	93	159	209	304	304
	93	159	209	304	304
	93	159	209	304	304
	93	159	209	304	304
	93	159	209	304	304
	93	159	209	304	304
	93	159	208	303	303
	93	159	208	303	303
	93	159	208	303	303
	93	159	208	303	303
	93	159	208	303	303
	93	159	208	303	303
	93	159	208	303	303
	93	159	208	303	303
	93	158	208	302	302
	93	158	208	302	302
	93	158	208	302	302
	92	158	208	302	302
	92	158	207	302	302
	92	158	207	302	302
	92	158	207	302	302
	92	158	207	302	302
	92	158	207	302	302
	92	158	207	302	302
	92	158	207	302	302
	92	158	207	301	301
	92	158	207	301	301
	92	158	207	301	301
	92	158	207	301	301
	92	158	207	301	301
	92	158	207	301	301
	92	158	207	301	301
	92	158	207	301	301
	92	158	207	300	300
	92	158	207	300	300
	92	158	207	300	300
	92	158	207	300	300
	92	157	206	300	300
	92	157	206	300	300
	92	157	206	300	300
	92	157	206	300	300
	92	157	206	300	300
	92	157	206	299	299
	92	157	206	299	299
	92	157	206	299	299
	92	157	206	299	299
	92	157	206	299	299
	92	157	206	299	299
	92	157	206	299	299
	92	157	205	299	299
	91	157	205	299	299
	91	157	205	299	299
	91	157	205	299	299
	91	157	205	298	298
	91	157	205	298	298
	91	157	205	298	298
	91	157	205	298	298
	91	157	205	298	298
	91	157	205	298	298
	91	157	205	298	298
	91	157	205	298	298
	91	156	205	298	298
	91	156	205	298	298
	91	156	205	298	298
	91	156	205	298	298
	91	156	205	298	298
	91	156	205	298	298
	91	156	205	298	298
	91	156	205	298	298
	91	156	204	298	298
	91	156	204	297	297
	91	156	204	297	297
	91	156	204	297	297
	91	156	204	297	297
	91	156	204	297	297
	91	156	204	297	297
	91	156	204	297	297
	91	156	204	297	297
	91	156	204	297	297
	91	156	204	297	297
	91	156	204	297	297
	91	156	204	297	297
	91	156	204	297	297
	91	156	204	297	297
	91	155	204	297	297
	91	155	204	297	297
	91	155	204	296	296
	91	155	203	296	296
	90	155	203	296	296
	90	155	203	296	296
	90	155	203	296	296
	90	155	203	296	296
	90	155	203	296	296
	90	155	203	296	296
	90	155	203	296	296
	90	155	203	296	296
	90	155	203	296	296
	90	155	203	296	296
	90	155	203	296	296
	90	155	203	296	296
	90	155	203	295	295
	90	155	203	295	295
	90	155	203	295	295
	90	155	203	295	295
	90	154	203	295	295
	90	154	203	295	295
	90	154	203	295	295
	90	154	203	295	295
	90	154	203	295	295
	90	154	203	295	295
	90	154	202	295	295
	90	154	202	295	295
	90	154	202	295	295
	90	154	202	294	294
	90	154	202	294	294
	90	154	202	294	294
	90	154	202	294	294
	90	154	202	294	294
	90	154	202	294	294
	90	154	202	294	294
	90	154	202	294	294
	90	154	202	294	294
	89	154	202	294	294
	89	154	202	294	294
	89	154	202	294	294
	89	154	202	294	294
	89	154	202	294	294
	89	154	202	294	294
	89	154	201	294	294
	89	154	201	293	293
	89	153	201	293	293
	89	153	201	293	293
	89	153	201	293	293
	89	153	201	293	293
	89	153	201	293	293
	89	153	201	293	293
	89	153	201	293	293
	89	153	201	293	293
	89	153	201	293	293
	89	153	201	293	293
	89	153	201	293	293
	89	153	201	293	293
	89	153	201	293	293
	89	153	201	293	293
	89	153	201	292	292
	89	153	200	292	292
	89	153	200	292	292
	89	153	200	292	292
	89	153	200	292	292
	89	153	200	292	292
	89	153	200	292	292
	89	153	200	292	292
	89	153	200	292	292
	89	153	200	292	292
	89	153	200	292	292
	89	153	200	292	292
	89	153	200	292	292
	89	153	200	292	292
	89	153	200	292	292
	89	152	200	291	291
	89	152	199	291	291
	89	152	199	291	291
	89	152	199	291	291
	89	152	199	291	291
	89	152	199	291	291
	88	152	199	291	291
	88	152	199	291	291
	88	152	199	291	291
	88	152	199	291	291
	88	152	199	291	291
	88	152	199	291	291
	88	152	199	290	290
	88	152	199	290	290
	88	152	199	290	290
	88	152	199	290	290
	88	152	199	290	290
	88	152	198	290	290
	88	152	198	290	290
	88	152	198	290	290
	88	152	198	290	290
	88	152	198	290	290
	88	151	198	290	290
	88	151	198	290	290
	88	151	198	290	290
	88	151	198	290	290
	88	151	198	290	290
	88	151	198	290	290
	88	151	198	290	290
	88	151	198	289	289
	88	151	198	289	289
	88	151	198	289	289
	88	151	198	289	289
	88	151	198	289	289
	88	151	198	289	289
	88	151	197	289	289
	88	151	197	289	289
	88	151	197	289	289
	88	151	197	289	289
	88	151	197	289	289
	88	151	197	289	289
	88	151	197	289	289
	88	150	197	289	289
	88	150	197	288	288
	88	150	197	288	288
	88	150	197	288	288
	88	150	197	288	288
	88	150	197	288	288
	88	150	197	288	288
	88	150	197	288	288
	88	150	197	288	288
	88	150	197	288	288
	88	150	197	288	288
	88	150	196	288	288
	87	150	196	288	288
	87	150	196	287	287
	87	150	196	287	287
	87	150	196	287	287
	87	150	196	287	287
	87	150	196	287	287
	87	150	196	287	287
	87	150	196	287	287
	87	150	196	287	287
	87	150	196	287	287
	87	150	196	287	287
	87	149	196	287	287
	87	149	196	287	287
	87	149	196	287	287
	87	149	196	287	287
	87	149	196	287	287
	87	149	196	287	287
	87	149	196	287	287
	87	149	196	286	286
	87	149	195	286	286
	87	149	195	286	286
	87	149	195	286	286
	87	149	195	286	286
	87	149	195	286	286
	87	149	195	286	286
	87	149	195	286	286
	87	149	195	286	286
	87	149	195	285	285
	87	149	195	285	285
	87	149	195	285	285
	87	149	195	285	285
	87	149	195	285	285
	87	149	195	285	285
	87	149	194	285	285
	87	148	194	285	285
	87	148	194	285	285
	87	148	194	285	285
	87	148	194	285	285
	87	148	194	285	285
	87	148	194	285	285
	87	148	194	285	285
	87	148	194	284	284
	87	148	194	284	284
	87	148	194	284	284
	87	148	194	284	284
	86	148	194	284	284
	86	148	194	284	284
	86	148	194	284	284
	86	148	194	284	284
	86	148	194	284	284
	86	148	194	284	284
	86	148	194	284	284
	86	148	193	284	284
	86	148	193	284	284
	86	148	193	284	284
	86	148	193	284	284
	86	148	193	284	284
	86	148	193	284	284
	86	148	193	284	284
	86	148	193	283	283
	86	148	193	283	283
	86	148	193	283	283
	86	148	193	283	283
	86	148	193	283	283
	86	147	193	283	283
	86	147	193	283	283
	86	147	193	283	283
	86	147	193	283	283
	86	147	193	283	283
	86	147	193	283	283
	86	147	193	283	283
	86	147	193	283	283
	86	147	193	283	283
	86	147	193	283	283
	86	147	193	283	283
	86	147	193	283	283
	86	147	192	283	283
	86	147	192	283	283
	86	147	192	282	282
	86	147	192	282	282
	86	147	192	282	282
	86	147	192	282	282
	86	147	192	282	282
	86	147	192	282	282
	86	147	192	282	282
	86	147	192	282	282
	86	147	192	282	282
	86	147	192	282	282
	86	147	192	282	282
	85	147	192	282	282
	85	147	192	282	282
	85	147	192	282	282
	85	147	192	282	282
	85	147	192	282	282
	85	146	192	282	282
	85	146	192	282	282
	85	146	191	282	282
	85	146	191	282	282
	85	146	191	282	282
	85	146	191	282	282
	85	146	191	282	282
	85	146	191	282	282
	85	146	191	281	281
	85	146	191	281	281
	85	146	191	281	281
	85	146	191	281	281
	85	146	191	281	281
	85	146	191	281	281
	85	146	191	281	281
	85	146	191	281	281
	85	146	191	281	281
	85	146	191	281	281
	85	146	191	281	281
	85	146	191	281	281
	85	146	191	281	281
	85	146	191	281	281
	85	146	191	281	281
	85	146	191	281	281
	85	146	191	281	281
	85	146	191	281	281
	85	146	190	281	281
	85	146	190	281	281
	85	145	190	281	281
	85	145	190	281	281
	85	145	190	280	280
	85	145	190	280	280
	85	145	190	280	280
	85	145	190	280	280
	85	145	190	280	280
	85	145	190	280	280
	85	145	190	280	280
	85	145	190	280	280
	85	145	190	280	280
	85	145	190	280	280
	85	145	190	280	280
	85	145	190	280	280
	85	145	190	280	280
	85	145	190	280	280
	84	145	190	280	280
	84	145	190	280	280
	84	145	190	280	280
	84	145	190	280	280
	84	145	190	280	280
	84	145	190	280	280
	84	145	190	279	279
	84	145	190	279	279
	84	145	190	279	279
	84	145	189	279	279
	84	145	189	279	279
	84	145	189	279	279
	84	145	189	279	279
	84	145	189	279	279
	84	145	189	279	279
	84	145	189	279	279
	84	144	189	279	279
	84	144	189	279	279
	84	144	189	279	279
	84	144	189	278	278
	84	144	189	278	278
	84	144	189	278	278
	84	144	189	278	278
	84	144	189	278	278
	84	144	189	278	278
	84	144	189	278	278
	84	144	189	278	278
	84	144	189	278	278
	84	144	189	277	277
	84	144	189	277	277
	84	144	189	277	277
	84	144	189	277	277
	84	144	189	277	277
	84	144	188	277	277
	84	144	188	277	277
	84	144	188	277	277
	84	144	188	277	277
	84	144	188	277	277
	84	144	188	277	277
	84	144	188	277	277
	84	144	188	277	277
	83	144	188	277	277
	83	144	188	276	276
	83	144	188	276	276
	83	144	188	276	276
	83	144	188	276	276
	83	144	188	276	276
	83	144	188	276	276
	83	143	188	276	276
	83	143	188	276	276
	83	143	188	276	276
	83	143	188	276	276
	83	143	188	276	276
	83	143	188	276	276
	83	143	188	276	276
	83	143	188	276	276
	83	143	188	276	276
	83	143	188	276	276
	83	143	188	276	276
	83	143	188	275	275
	83	143	187	275	275
	83	143	187	275	275
	83	143	187	275	275
	83	143	187	275	275
	83	143	187	275	275
	83	143	187	275	275
	83	143	187	275	275
	83	143	187	275	275
	83	143	187	275	275
	83	143	187	275	275
	83	143	187	275	275
	83	143	187	275	275
	83	143	187	275	275
	83	143	187	275	275
	83	143	187	275	275
	83	143	187	275	275
	83	143	187	275	275
	83	143	187	275	275
	83	143	187	275	275
	83	143	187	275	275
	83	143	187	275	275
	83	142	187	275	275
	83	142	187	275	275
	83	142	187	275	275
	83	142	187	275	275
	83	142	187	275	275
	83	142	187	275	275
	83	142	187	275	275
	82	142	187	275	275
	82	142	186	275	275
	82	142	186	274	274
	82	142	186	274	274
	82	142	186	274	274
	82	142	186	274	274
	82	142	186	274	274
	82	142	186	274	274
	82	142	186	274	274
	82	142	186	274	274
	82	142	186	274	274
	82	142	186	274	274
	82	142	186	274	274
	82	142	186	274	274
	82	142	186	274	274
	82	142	186	273	273
	82	142	186	273	273
	82	142	186	273	273
	82	142	186	273	273
	82	142	186	273	273
	82	142	186	273	273
	82	142	186	273	273
	82	142	186	273	273
	82	142	186	273	273
	82	142	186	273	273
	82	142	186	273	273
	82	141	186	273	273
	82	141	186	273	273
	82	141	186	273	273
	82	141	186	273	273
	82	141	186	273	273
	82	141	186	272	272
	82	141	185	272	272
	82	141	185	272	272
	82	141	185	272	272
	82	141	185	272	272
	82	141	185	272	272
	82	141	185	272	272
	82	141	185	272	272
	82	141	185	272	272
	82	141	185	272	272
	82	141	185	272	272
	82	141	185	272	272
	82	141	185	272	272
	82	141	185	272	272
	82	141	185	272	272
	82	141	185	272	272
	82	141	185	272	272
	82	141	185	272	272
	82	141	185	272	272
	82	141	185	272	272
	82	141	185	272	272
	82	141	185	272	272
	82	141	185	271	271
	82	141	185	271	271
	82	141	185	271	271
	81	141	185	271	271
	81	141	185	271	271
	81	141	185	271	271
	81	141	185	271	271
	81	141	184	271	271
	81	141	184	271	271
	81	141	184	271	271
	81	141	184	271	271
	81	141	184	271	271
	81	141	184	271	271
	81	141	184	271	271
	81	141	184	271	271
	81	140	184	271	271
	81	140	184	271	271
	81	140	184	271	271
	81	140	184	271	271
	81	140	184	271	271
	81	140	184	271	271
	81	140	184	270	270
	81	140	184	270	270
	81	140	184	270	270
	81	140	184	270	270
	81	140	184	270	270
	81	140	184	270	270
	81	140	184	270	270
	81	140	184	270	270
	81	140	184	270	270
	81	140	184	270	270
	81	140	184	270	270
	81	140	183	270	270
	81	140	183	270	270
	81	140	183	270	270
	81	140	183	270	270
	81	140	183	270	270
	81	140	183	270	270
	81	140	183	269	269
	81	140	183	269	269
	81	140	183	269	269
	81	140	183	269	269
	81	140	183	269	269
	81	140	183	269	269
	81	140	183	269	269
	81	140	183	269	269
	81	140	183	269	269
	81	140	183	269	269
	81	140	183	269	269
	81	140	183	269	269
	81	140	183	269	269
	81	140	183	269	269
	81	139	183	269	269
	81	139	183	269	269
	81	139	183	269	269
	81	139	183	269	269
	81	139	183	269	269
	81	139	183	269	269
	81	139	183	269	269
	81	139	183	269	269
	81	139	183	269	269
	81	139	183	268	268
	81	139	183	268	268
	81	139	183	268	268
	81	139	183	268	268
	81	139	183	268	268
	81	139	183	268	268
	81	139	183	268	268
	81	139	183	268	268
	81	139	183	268	268
	81	139	183	268	268
	81	139	183	268	268
	81	139	182	268	268
	81	139	182	268	268
	80	139	182	268	268
	80	139	182	268	268
	80	139	182	268	268
	80	139	182	268	268
	80	139	182	268	268
	80	139	182	268	268
	80	139	182	268	268
	80	139	182	268	268
	80	139	182	268	268
	80	139	182	267	267
	80	139	182	267	267
	80	139	182	267	267
	80	139	182	267	267
	80	138	182	267	267
	80	138	182	267	267
	80	138	182	267	267
	80	138	182	267	267
	80	138	182	267	267
	80	138	182	267	267
	80	138	182	267	267
	80	138	182	267	267
	80	138	182	267	267
	80	138	182	267	267
	80	138	181	267	267
	80	138	181	267	267
	80	138	181	267	267
	80	138	181	267	267
	80	138	181	267	267
	80	138	181	267	267
	80	138	181	267	267
	80	138	181	267	267
	80	138	181	267	267
	80	138	181	267	267
	80	138	181	267	267
	80	138	181	267	267
	80	138	181	267	267
	80	138	181	267	267
	80	138	181	267	267
	80	138	181	267	267
	80	138	181	267	267
	80	138	181	266	266
	80	138	181	266	266
	80	138	181	266	266
	80	138	181	266	266
	80	138	181	266	266
	80	138	181	266	266
	80	138	181	266	266
	80	138	181	266	266
	80	138	181	266	266
	80	138	181	266	266
	80	138	181	266	266
	80	138	181	266	266
	79	138	180	266	266
	79	138	180	266	266
	79	138	180	266	266
	79	138	180	266	266
	79	138	180	266	266
	79	138	180	266	266
	79	137	180	266	266
	79	137	180	266	266
	79	137	180	266	266
	79	137	180	266	266
	79	137	180	266	266
	79	137	180	266	266
	79	137	180	266	266
	79	137	180	266	266
	79	137	180	265	265
	79	137	180	265	265
	79	137	180	265	265
	79	137	180	265	265
	79	137	180	265	265
	79	137	180	265	265
	79	137	180	265	265
	79	137	180	265	265
	79	137	180	265	265
	79	137	180	265	265
	79	137	180	265	265
	79	137	180	265	265
	79	137	180	265	265
	79	137	180	265	265
	79	137	180	265	265
	79	137	180	265	265
	79	137	180	265	265
	79	137	180	265	265
	79	137	180	265	265
	79	137	180	265	265
	79	137	179	265	265
	79	137	179	265	265
	79	137	179	264	264
	79	137	179	264	264
	79	137	179	264	264
	79	137	179	264	264
	79	137	179	264	264
	79	136	179	264	264
	79	136	179	264	264
	79	136	179	264	264
	79	136	179	264	264
	79	136	179	264	264
	79	136	179	264	264
	79	136	179	264	264
	79	136	179	264	264
	79	136	179	264	264
	79	136	179	264	264
	79	136	179	264	264
	79	136	179	264	264
	79	136	179	264	264
	79	136	179	264	264
	79	136	179	264	264
	79	136	179	264	264
	79	136	179	264	264
	79	136	179	264	264
	79	136	179	264	264
	79	136	179	264	264
	79	136	179	263	263
	79	136	179	263	263
	79	136	179	263	263
	79	136	179	263	263
	79	136	179	263	263
	79	136	179	263	263
	79	136	179	263	263
	79	136	179	263	263
	79	136	179	263	263
	79	136	179	263	263
	79	136	179	263	263
	78	136	179	263	263
	78	136	179	263	263
	78	136	178	263	263
	78	136	178	263	263
	78	136	178	263	263
	78	136	178	263	263
	78	136	178	263	263
	78	136	178	263	263
	78	136	178	263	263
	78	136	178	263	263
	78	136	178	262	262
	78	136	178	262	262
	78	136	178	262	262
	78	136	178	262	262
	78	136	178	262	262
	78	136	178	262	262
	78	135	178	262	262
	78	135	178	262	262
	78	135	178	262	262
	78	135	178	262	262
	78	135	178	262	262
	78	135	178	262	262
	78	135	178	262	262
	78	135	178	262	262
	78	135	178	262	262
	78	135	178	262	262
	78	135	178	262	262
	78	135	178	262	262
	78	135	178	262	262
	78	135	178	262	262
	78	135	178	262	262
	78	135	178	262	262
	78	135	177	261	261
	78	135	177	261	261
	78	135	177	261	261
	78	135	177	261	261
	78	135	177	261	261
	78	135	177	261	261
	78	135	177	261	261
	78	135	177	261	261
	78	135	177	261	261
	78	135	177	261	261
	78	135	177	261	261
	78	135	177	261	261
	78	135	177	261	261
	78	135	177	261	261
	78	135	177	261	261
	78	135	177	261	261
	78	135	177	261	261
	78	135	177	261	261
	78	135	177	261	261
	78	135	177	260	260
	78	135	177	260	260
	78	135	177	260	260
	78	135	177	260	260
	78	135	177	260	260
	78	135	177	260	260
	78	135	177	260	260
	78	135	177	260	260
	78	135	177	260	260
	78	135	177	260	260
	78	135	177	260	260
	78	135	177	260	260
	78	135	177	260	260
	78	134	177	260	260
	77	134	177	260	260
	77	134	177	260	260
	77	134	177	260	260
	77	134	177	260	260
	77	134	177	260	260
	77	134	177	260	260
	77	134	177	260	260
	77	134	177	260	260
	77	134	177	260	260
	77	134	176	260	260
	77	134	176	260	260
	77	134	176	260	260
	77	134	176	260	260
	77	134	176	260	260
	77	134	176	260	260
	77	134	176	260	260
	77	134	176	260	260
	77	134	176	259	259
	77	134	176	259	259
	77	134	176	259	259
	77	134	176	259	259
	77	134	176	259	259
	77	134	176	259	259
	77	134	176	259	259
	77	134	176	259	259
	77	134	176	259	259
	77	134	176	259	259
	77	134	176	259	259
	77	134	176	259	259
	77	134	176	259	259
	77	134	176	259	259
	77	134	176	259	259
	77	134	176	259	259
	77	134	176	259	259
	77	134	176	259	259
	77	134	176	259	259
	77	134	176	259	259
	77	134	176	259	259
	77	134	176	259	259
	77	134	176	259	259
	77	134	176	259	259
	77	134	176	259	259
	77	134	176	259	259
	77	134	176	259	259
	77	134	176	259	259
	77	134	176	259	259
	77	134	176	259	259
	77	134	176	259	259
	77	134	176	259	259
	77	133	175	259	259
	77	133	175	259	259
	77	133	175	259	259
	77	133	175	258	258
	77	133	175	258	258
	77	133	175	258	258
	77	133	175	258	258
	77	133	175	258	258
	77	133	175	258	258
	77	133	175	258	258
	77	133	175	258	258
	77	133	175	258	258
	77	133	175	258	258
	77	133	175	258	258
	77	133	175	258	258
	77	133	175	258	258
	77	133	175	258	258
	77	133	175	258	258
	77	133	175	258	258
	77	133	175	258	258
	77	133	175	258	258
	77	133	175	258	258
	77	133	175	258	258
	77	133	175	258	258
	77	133	175	258	258
	77	133	175	257	257
	77	133	175	257	257
	77	133	175	257	257
	77	133	175	257	257
	77	133	175	257	257
	77	133	175	257	257
	77	133	175	257	257
	77	133	175	257	257
	77	133	175	257	257
	77	133	175	257	257
	77	133	175	257	257
	77	133	175	257	257
	77	133	175	257	257
	77	133	175	257	257
	76	133	175	257	257
	76	133	175	257	257
	76	133	175	257	257
	76	132	175	257	257
	76	132	175	257	257
	76	132	175	257	257
	76	132	174	257	257
	76	132	174	257	257
	76	132	174	257	257
	76	132	174	257	257
	76	132	174	257	257
	76	132	174	256	256
	76	132	174	256	256
	76	132	174	256	256
	76	132	174	256	256
	76	132	174	256	256
	76	132	174	256	256
	76	132	174	256	256
	76	132	174	256	256
	76	132	174	256	256
	76	132	174	256	256
	76	132	174	256	256
	76	132	174	256	256
	76	132	174	256	256
	76	132	174	256	256
	76	132	174	256	256
	76	132	174	256	256
	76	132	174	256	256
	76	132	174	256	256
	76	132	174	256	256
	76	132	174	256	256
	76	132	174	256	256
	76	132	174	256	256
	76	132	174	255	255
	76	132	174	255	255
	76	132	174	255	255
	76	132	174	255	255
	76	132	174	255	255
	76	132	174	255	255
	76	132	174	255	255
	76	132	174	255	255
	76	132	174	255	255
	76	132	174	255	255
	76	132	174	255	255
	76	132	174	255	255
	76	132	173	255	255
	76	132	173	255	255
	76	132	173	255	255
	76	132	173	255	255
	76	132	173	255	255
	76	132	173	255	255
	76	132	173	255	255
	76	132	173	255	255
	76	131	173	255	255
	76	131	173	255	255
	76	131	173	255	255
	76	131	173	255	255
	76	131	173	255	255
	76	131	173	255	255
	76	131	173	255	255
	76	131	173	255	255
	76	131	173	255	255
	76	131	173	255	255
	76	131	173	255	255
	76	131	173	255	255
	76	131	173	254	254
	76	131	173	254	254
	76	131	173	254	254
	76	131	173	254	254
	76	131	173	254	254
	76	131	173	254	254
	76	131	173	254	254
	76	131	173	254	254
	76	131	172	254	254
	76	131	172	254	254
	76	131	172	254	254
	76	131	172	254	254
	76	131	172	254	254
	76	131	172	254	254
	76	131	172	254	254
	76	131	172	254	254
	76	131	172	254	254
	76	131	172	254	254
	76	131	172	254	254
	76	131	172	254	254
	76	131	172	254	254
	75	131	172	254	254
	75	131	172	254	254
	75	131	172	254	254
	75	131	172	254	254
	75	131	172	254	254
	75	131	172	254	254
	75	131	172	254	254
	75	131	172	254	254
	75	131	172	253	253
	75	131	172	253	253
	75	131	172	253	253
	75	131	172	253	253
	75	131	172	253	253
	75	131	172	253	253
	75	131	172	253	253
	75	131	172	253	253
	75	131	172	253	253
	75	131	172	253	253
	75	131	172	253	253
	75	131	172	253	253
	75	131	172	253	253
	75	131	172	253	253
	75	131	172	253	253
	75	131	172	253	253
	75	131	172	253	253
	75	131	171	253	253
	75	130	171	253	253
	75	130	171	253	253
	75	130	171	253	253
	75	130	171	253	253
	75	130	171	253	253
	75	130	171	253	253
	75	130	171	253	253
	75	130	171	253	253
	75	130	171	253	253
	75	130	171	253	253
	75	130	171	253	253
	75	130	171	253	253
	75	130	171	253	253
	75	130	171	253	253
	75	130	171	253	253
	75	130	171	253	253
	75	130	171	252	252
	75	130	171	252	252
	75	130	171	252	252
	75	130	171	252	252
	75	130	171	252	252
	75	130	171	252	252
	75	130	171	252	252
	75	130	171	252	252
	75	130	171	252	252
	75	130	171	252	252
	75	130	171	252	252
	75	130	171	252	252
	75	130	171	252	252
	75	130	171	252	252
	75	130	171	252	252
	75	130	171	252	252
	75	130	171	252	252
	75	130	171	252	252
	75	130	171	252	252
	75	130	171	252	252
	75	130	171	252	252
	75	130	171	252	252
	75	130	171	252	252
	75	130	171	252	252
	75	130	171	252	252
	75	130	171	252	252
	75	130	171	252	252
	75	130	171	252	252
	75	130	171	252	252
	75	130	171	252	252
	75	130	171	252	252
	75	130	170	251	251
	75	130	170	251	251
	75	130	170	251	251
	75	130	170	251	251
	75	130	170	251	251
	75	130	170	251	251
	75	130	170	251	251
	75	130	170	251	251
	74	130	170	251	251
	74	130	170	251	251
	74	130	170	251	251
	74	129	170	251	251
	74	129	170	251	251
	74	129	170	251	251
	74	129	170	251	251
	74	129	170	251	251
	74	129	170	251	251
	74	129	170	251	251
[truncated: 62,386 more rows]

## Sheet: Figure 1-figure supplement 1F
Median of UMI
Percentage of data	20% data	40% data	60% data	80% data	100% data
Data of exponential period E. coli	1553	2931	3973	6294	6295
	1409	2695	3781	6065	6060		Figure 1-figure supplement 1F. Median of UMI per cell of exponential period E. coli
	814	1502	2144	3440	3440		Percentage of data	Top 1000 cells	Top 5000 cells	Top 10000 cells
	746	1370	1878	3046	3045		0% data	0	0	0
	670	1274	1810	2924	2922		20% data	164	91	67
	651	1270	1787	2907	2905		40% data	312.5	174	129
	646	1229	1699	2766	2768		60% data	433.5	242	179
	608	1210	1682	2743	2746		80% data	704	390	290
	594	1153	1616	2687	2688		100% data	705	390	290
	568	1138	1579	2527	2525
	567	1105	1571	2486	2489
	547	1097	1535	2478	2475
	543	1086	1521	2473	2472
	530	1031	1420	2301	2305
	500	915	1285	2085	2085
	484	915	1248	2069	2068
	482	905	1244	2031	2030
	464	894	1239	2019	2016
	462	886	1216	1979	1981
	455	881	1212	1948	1947
	453	868	1211	1933	1935
	450	859	1193	1911	1911
	443	822	1152	1910	1910
	430	809	1151	1890	1889
	413	809	1133	1876	1876
	407	789	1130	1844	1845
	403	772	1086	1794	1794
	403	766	1082	1714	1715
	402	764	1052	1710	1712
	399	737	1045	1671	1676
	394	732	1010	1653	1652
	385	727	1008	1644	1645
	377	727	1005	1643	1642
	377	723	1004	1629	1631
	376	720	1000	1611	1613
	373	704	994	1607	1608
	369	703	971	1594	1597
	368	696	971	1594	1596
	366	691	971	1590	1592
	363	688	959	1586	1586
	358	688	954	1546	1545
	353	683	954	1545	1544
	351	682	952	1540	1544
	350	680	950	1539	1538
	349	680	947	1524	1522
	349	679	932	1522	1520
	348	679	926	1500	1502
	347	674	925	1494	1494
	346	671	925	1493	1494
	344	669	908	1492	1490
	339	646	900	1478	1479
	339	645	900	1478	1477
	339	640	899	1467	1469
	337	639	897	1452	1450
	336	639	897	1452	1450
	335	629	894	1427	1425
	333	624	878	1418	1418
	329	619	860	1387	1387
	327	619	860	1378	1379
	326	618	859	1372	1373
	326	616	842	1359	1360
	325	613	841	1355	1356
	324	611	840	1355	1356
	323	607	840	1353	1354
	322	602	839	1348	1347
	320	592	838	1348	1347
	318	592	827	1348	1346
	318	589	822	1343	1343
	314	588	818	1341	1341
	308	585	818	1333	1333
	307	583	807	1326	1326
	307	582	801	1319	1320
	306	573	799	1303	1302
	302	572	794	1299	1299
	299	570	793	1299	1298
	298	566	789	1297	1297
	297	564	781	1283	1281
	296	561	780	1275	1277
	296	560	777	1270	1271
	294	559	776	1266	1266
	290	558	773	1263	1262
	290	554	769	1257	1256
	288	553	766	1253	1253
	287	552	765	1251	1252
	286	548	760	1245	1248
	285	548	755	1241	1240
	285	546	754	1235	1235
	285	544	753	1228	1228
	284	541	752	1225	1225
	283	539	750	1221	1220
	281	537	750	1220	1219
	280	536	745	1219	1217
	279	534	743	1209	1210
	278	534	742	1204	1204
	277	531	740	1200	1201
	276	530	739	1194	1193
	275	528	735	1187	1188
	275	525	728	1179	1180
	274	524	727	1175	1174
	273	523	724	1173	1173
	273	522	722	1171	1171
	270	521	721	1170	1170
	269	518	720	1167	1168
	269	518	719	1163	1164
	268	516	718	1159	1159
	267	512	718	1157	1157
	266	512	715	1156	1157
	265	511	714	1155	1154
	265	511	712	1146	1147
	265	510	712	1146	1146
	264	509	709	1146	1145
	263	509	707	1144	1144
	263	508	706	1139	1140
	261	505	706	1133	1134
	261	501	702	1132	1132
	260	498	696	1129	1128
	260	497	696	1120	1121
	259	497	696	1119	1119
	259	497	692	1116	1115
	258	496	692	1111	1112
	257	493	691	1108	1108
	257	493	690	1108	1107
	255	492	685	1104	1106
	254	491	683	1104	1104
	254	490	683	1103	1102
	254	489	681	1097	1098
	253	489	681	1090	1091
	253	485	677	1090	1090
	251	485	672	1090	1090
	251	484	672	1089	1088
	250	482	671	1085	1085
	250	480	667	1082	1083
	248	479	666	1079	1079
	248	477	665	1078	1078
	246	474	661	1078	1078
	246	469	660	1070	1070
	246	469	656	1065	1065
	245	468	656	1059	1059
	245	468	653	1058	1059
	244	465	653	1057	1057
	244	465	651	1056	1056
	244	464	651	1054	1055
	243	464	647	1053	1053
	243	464	647	1053	1053
	243	460	646	1053	1053
	242	459	644	1052	1052
	240	457	642	1044	1044
	240	457	642	1041	1041
	240	456	642	1041	1041
	239	455	639	1040	1041
	239	454	638	1039	1040
	239	453	638	1037	1037
	239	453	636	1035	1035
	238	452	635	1034	1034
	238	452	632	1032	1031
	238	451	631	1028	1030
	238	450	630	1024	1024
	237	450	628	1023	1023
	237	450	628	1022	1021
	236	449	625	1022	1021
	236	449	625	1020	1020
	236	449	624	1019	1019
	236	448	621	1013	1015
	236	448	620	1006	1008
	234	447	619	1004	1004
	234	447	619	1004	1003
	232	446	618	1003	1003
	231	445	617	1002	1003
	231	445	616	1002	1002
	230	443	616	997	998
	230	443	616	996	996
	230	442	612	995	995
	229	441	612	995	995
	229	441	610	991	992
	228	438	609	990	990
	228	437	609	989	989
	228	435	606	988	987
	228	435	606	987	986
	227	434	605	985	986
	227	434	605	984	986
	226	434	604	983	982
	226	430	603	978	977
	226	430	602	978	977
	226	429	600	973	974
	226	428	598	968	967
	225	427	595	968	967
	225	427	592	967	966
	225	427	592	962	962
	225	427	591	961	962
	224	426	591	960	961
	224	425	591	960	960
	224	425	590	959	959
	223	424	588	958	957
	222	424	588	956	955
	222	424	587	953	953
	222	422	587	951	952
	222	422	584	951	951
	221	421	580	945	946
	221	421	580	944	945
	221	420	578	943	943
	220	420	578	938	936
	220	419	577	936	935
	219	418	577	935	934
	219	417	576	933	934
	219	417	576	932	932
	219	416	576	931	931
	219	416	575	931	931
	218	414	574	930	929
	218	413	574	926	924
	218	413	571	922	921
	218	412	571	921	921
	218	412	570	920	921
	218	412	569	915	917
	217	411	569	914	915
	217	411	569	914	915
	217	411	568	914	914
	217	410	567	914	914
	217	410	567	913	913
	215	408	565	913	912
	215	408	564	912	911
	215	407	563	911	910
	215	407	563	908	908
	215	406	563	904	905
	214	406	562	904	904
	214	405	562	903	903
	212	404	560	902	903
	212	404	560	902	902
	212	404	557	902	901
	211	404	557	900	900
	211	399	554	899	900
	211	399	554	898	899
	211	399	554	897	896
	210	398	552	897	896
	210	397	551	896	895
	210	397	551	893	894
	209	397	551	892	892
	209	397	551	890	890
	209	397	549	888	888
	209	396	549	886	887
	208	396	548	885	885
	208	395	547	882	883
	208	394	543	882	883
	208	390	542	879	879
	207	390	541	877	877
	207	390	541	875	875
	207	390	539	874	874
	207	389	538	873	873
	207	389	537	873	873
	207	389	536	871	869
	206	388	534	869	869
	206	388	534	866	865
	206	388	532	864	865
	205	388	531	864	863
	205	387	531	862	862
	204	386	531	861	861
	204	386	530	859	858
	204	386	530	858	858
	203	385	528	856	857
	203	384	528	853	854
	203	384	528	851	852
	203	384	527	851	851
	203	383	527	850	849
	202	383	526	846	848
	202	383	525	844	844
	202	382	525	843	843
	202	382	524	843	843
	201	381	523	842	841
	200	381	523	841	840
	199	380	522	841	840
	199	380	522	838	839
	199	380	522	838	838
	198	380	521	837	836
	198	379	521	836	836
	198	379	521	833	833
	198	377	521	832	832
	197	376	520	831	832
	197	374	518	831	830
	196	374	518	829	829
	196	373	518	829	828
	196	372	518	828	828
	196	372	517	827	826
	196	371	516	826	826
	195	371	515	825	825
	195	370	514	824	825
	195	369	514	824	824
	195	369	514	824	824
	195	369	513	824	823
	194	369	513	824	823
	194	369	512	823	823
	194	368	511	822	821
	194	368	511	822	821
	194	368	511	822	821
	194	367	511	820	820
	194	367	511	820	819
	194	366	511	819	819
	194	366	510	819	819
	193	366	510	819	819
	193	365	510	817	818
	192	365	510	816	816
	192	365	510	815	815
	192	364	510	814	814
	191	364	506	813	813
	191	363	505	813	813
	191	363	505	811	811
	191	363	504	811	809
	191	363	504	810	809
	191	362	503	809	808
	191	362	503	808	808
	191	362	503	806	807
	190	361	502	806	805
	190	361	502	805	805
	190	360	502	803	804
	190	360	502	803	803
	190	360	502	802	803
	190	360	501	802	803
	189	360	500	802	802
	189	360	500	802	802
	189	359	500	801	801
	189	359	499	801	801
	189	359	499	801	801
	188	359	499	801	800
	188	358	497	799	800
	188	358	497	799	799
	188	358	497	799	798
	188	356	496	798	796
	188	356	496	797	796
	188	356	496	796	795
	188	355	495	795	795
	187	355	495	794	794
	187	355	495	794	793
	187	354	494	793	793
	186	354	494	792	792
	186	354	492	792	792
	186	353	492	792	792
	186	353	491	790	790
	186	352	489	789	790
	185	352	488	789	790
	185	352	487	789	789
	185	351	487	789	788
	185	351	487	787	788
	185	351	486	785	785
	185	350	486	785	785
	185	350	485	785	784
	185	350	485	784	784
	185	350	485	784	784
	185	349	484	783	782
	184	349	484	781	781
	184	348	483	780	781
	184	348	483	779	781
	184	348	483	779	779
	184	348	483	779	779
	183	348	482	778	779
	183	348	482	778	777
	182	348	482	777	777
	182	347	481	777	776
	182	347	480	777	776
	182	347	480	776	776
	182	345	480	775	775
	181	345	480	775	775
	181	344	479	773	772
	180	344	479	771	771
	180	344	479	770	770
	180	343	479	770	769
	180	343	479	769	769
	179	343	479	769	768
	179	342	479	768	768
	179	342	478	768	768
	179	342	478	768	767
	179	342	478	767	766
	179	341	477	767	766
	179	341	477	766	766
	179	341	475	766	765
	179	341	474	766	765
	178	340	474	765	764
	178	340	474	764	764
	178	340	473	764	764
	177	340	472	763	762
	177	340	472	762	762
	177	339	472	762	761
	177	339	471	761	761
	177	338	470	761	760
	177	338	470	759	760
	177	338	469	759	759
	176	338	469	759	759
	176	338	468	758	758
	176	337	467	758	758
	175	337	467	758	758
	175	337	467	757	757
	175	336	467	756	756
	175	336	466	756	756
	175	335	466	756	756
	175	334	466	755	756
	175	334	465	755	755
	174	334	465	755	755
	174	334	465	755	755
	174	334	464	754	755
	174	334	464	754	754
	174	334	464	752	753
	174	333	464	752	753
	173	332	464	752	753
	173	332	463	752	752
	173	332	462	751	751
	173	332	462	751	750
	173	332	462	748	748
	173	330	462	747	747
	173	330	461	746	746
	173	330	460	745	746
	173	330	460	745	744
	173	329	460	744	744
	172	329	460	744	743
	172	329	459	744	743
	172	328	459	744	743
	172	328	458	743	743
	172	328	458	741	742
	172	328	457	741	741
	172	328	457	739	740
	172	328	457	738	740
	171	328	457	737	737
	171	327	456	736	736
	171	327	456	736	734
	171	327	456	736	734
	171	327	456	734	733
	171	326	455	734	733
	171	326	455	734	732
	171	326	455	733	732
	170	326	455	733	732
	170	325	454	733	732
	170	325	454	733	732
	170	325	454	732	732
	170	325	454	732	732
	170	325	453	732	731
	170	325	453	731	731
	169	324	453	731	731
	169	324	452	731	731
	169	324	452	731	731
	169	323	452	730	729
	169	323	451	729	729
	169	323	451	728	728
	169	323	451	728	728
	169	322	450	727	727
	169	322	450	726	726
	169	322	450	726	725
	168	322	450	726	725
	168	322	450	725	725
	168	322	448	725	725
	168	322	447	725	725
	168	322	447	725	724
	168	321	447	725	724
	168	321	446	724	723
	168	321	446	724	723
	168	321	446	723	723
	168	320	444	723	723
	168	320	444	722	722
	168	320	444	722	722
	168	320	443	722	722
	167	319	443	721	722
	167	319	443	721	721
	167	319	443	720	720
	167	319	443	719	719
	167	319	443	718	718
	167	319	443	717	717
	167	318	443	717	717
	167	318	442	717	717
	167	318	442	717	717
	167	318	442	716	716
	166	318	441	716	716
	166	318	441	716	716
	166	318	441	716	715
	166	317	441	715	714
	166	317	441	715	714
	166	317	441	714	714
	166	317	441	714	714
	166	317	441	714	713
	166	316	440	713	713
	166	316	440	713	713
	166	316	440	713	713
	165	316	440	713	713
	165	316	438	712	712
	165	316	438	712	712
	165	315	438	712	712
	165	315	438	711	711
	165	315	437	710	710
	165	315	437	710	710
	165	315	437	710	710
	165	315	437	710	710
	165	315	437	708	708
	165	314	437	708	707
	165	314	437	708	707
	165	314	436	708	707
	164	314	436	707	707
	164	314	436	707	707
	164	314	436	707	707
	164	314	436	707	707
	164	314	436	707	706
	164	314	436	707	706
	164	313	435	706	706
	164	313	435	706	706
	164	313	435	705	705
	164	313	434	705	705
	164	313	434	704	705
	164	312	433	704	705
	164	312	433	704	704
	164	312	432	703	704
	164	312	432	703	703
	164	311	432	703	702
	164	311	431	702	702
	163	311	431	702	702
	163	311	431	702	702
	163	311	431	702	701
	163	310	431	701	701
	163	310	430	701	700
	163	310	430	700	700
	163	310	430	699	699
	163	310	430	699	699
	163	310	430	699	699
	162	309	430	698	699
	162	309	430	698	698
	162	309	429	698	697
	162	309	429	697	697
	162	309	429	697	697
	162	309	429	697	697
	162	309	429	697	697
	162	309	429	697	696
	162	308	428	696	696
	162	308	428	695	695
	162	308	427	695	695
	162	308	427	695	695
	161	308	427	694	694
	161	308	427	694	694
	161	307	426	693	693
	161	307	426	693	693
	161	307	426	693	693
	161	307	426	693	692
	161	307	425	693	692
	161	307	425	692	692
	161	307	425	692	692
	161	306	424	691	692
	161	306	424	691	691
	160	306	424	691	691
	160	306	424	691	691
	160	306	424	691	690
	160	305	423	690	690
	160	305	423	690	690
	160	305	423	689	689
	160	305	423	688	689
	160	305	423	688	688
	160	305	423	688	687
	160	305	422	687	686
	160	305	422	685	686
	160	305	422	685	685
	160	304	422	684	684
	159	304	422	684	684
	159	304	421	683	684
	159	304	421	683	682
	158	304	420	682	682
	158	304	420	682	682
	158	304	420	682	682
	158	304	420	681	681
	158	304	420	680	681
	158	303	420	680	680
	157	303	420	680	679
	157	303	420	679	679
	157	303	419	679	679
	157	303	419	679	679
	157	303	419	678	678
	157	302	419	678	678
	157	302	419	678	678
	157	302	418	677	678
	157	302	418	677	677
	157	302	418	676	676
	157	302	418	676	676
	156	302	418	676	676
	156	301	417	675	675
	156	301	417	675	674
	156	301	417	673	674
	156	301	417	673	673
	156	301	416	673	673
	156	301	415	673	673
	156	300	415	673	672
	156	300	415	672	672
	156	300	415	672	671
	156	300	415	671	671
	155	300	415	670	670
	155	300	415	670	670
	155	300	415	670	670
	155	299	414	670	669
	155	299	414	670	669
	155	298	413	669	668
	155	298	413	667	668
	155	298	413	667	666
	155	298	413	666	666
	154	298	413	666	666
	154	297	413	666	666
	154	297	411	666	666
	154	297	411	664	665
	154	297	411	664	664
	154	296	411	664	664
	154	296	410	664	664
	154	295	410	663	663
	154	295	410	663	663
	154	295	410	663	663
	154	295	410	663	663
	153	295	410	663	663
	153	294	410	662	662
	153	294	409	662	662
	153	294	409	662	662
	153	294	408	661	662
	153	294	408	661	662
	153	294	407	661	660
	153	294	407	660	660
	153	294	407	659	659
	152	294	406	658	657
	152	293	405	658	657
	152	293	405	657	656
	152	293	405	657	656
	152	292	405	657	656
	152	292	405	656	655
	152	292	405	656	655
	152	292	404	655	655
	152	292	404	655	655
	152	292	404	655	655
	152	292	404	655	655
	152	292	404	654	655
	152	291	404	654	654
	152	291	404	653	653
	152	291	404	653	653
	152	291	403	652	652
	152	291	403	651	651
	151	291	403	650	651
	151	291	403	649	649
	151	291	402	649	649
	151	290	402	649	649
	151	290	402	649	649
	151	290	402	649	648
	151	290	401	648	648
	151	290	401	648	647
	151	290	401	648	647
	151	289	400	648	647
	151	289	400	647	647
	151	289	400	647	647
	151	289	400	647	647
	151	289	400	646	646
	151	289	400	646	646
	151	289	400	646	646
	150	288	400	646	646
	150	288	400	646	645
	150	288	399	646	645
	150	288	399	645	645
	150	287	399	645	645
	150	287	399	645	645
	150	287	399	645	645
	150	287	398	644	644
	150	287	398	644	644
	149	287	398	643	644
	149	287	397	643	644
	149	286	397	643	643
	149	286	397	642	642
	149	286	396	641	641
	149	286	396	641	641
	149	286	396	641	641
	149	285	396	640	641
	149	285	396	640	641
	149	285	396	640	640
	149	285	395	639	639
	149	284	395	639	639
	149	284	395	637	638
	149	284	394	637	637
	149	284	394	636	636
	149	284	394	636	636
	148	283	394	636	636
	148	283	394	635	635
	148	283	394	635	635
	148	283	394	635	634
	148	283	393	634	634
	148	282	392	634	634
	148	282	392	633	634
	148	282	392	633	634
	148	282	392	633	633
	148	282	392	632	633
	148	282	392	632	632
	147	282	392	632	632
	147	282	391	632	632
	147	282	391	631	632
	147	282	391	631	632
	147	282	391	631	631
	147	282	391	631	631
	147	282	391	631	631
	147	281	391	630	630
	147	281	390	630	630
	147	281	390	630	630
	147	281	390	630	629
	147	281	389	629	629
	147	280	389	629	629
	147	280	389	629	628
	147	280	389	628	628
	147	280	389	628	628
	147	280	388	627	628
	147	280	388	627	627
	147	280	388	627	626
	147	280	388	626	626
	147	280	388	626	626
	146	280	387	625	626
	146	280	387	625	625
	146	280	387	625	625
	146	279	387	624	624
	146	279	386	624	624
	146	279	386	624	624
	146	278	386	624	624
	146	278	386	624	624
	146	278	386	624	623
	146	278	386	623	623
	145	278	386	623	623
	145	278	385	623	623
	145	278	385	623	622
	145	278	385	622	622
	145	278	385	622	622
	145	277	385	622	622
	145	277	385	621	621
	145	277	385	621	621
	145	277	384	621	621
	145	277	384	620	621
	145	277	384	620	620
	145	276	384	619	620
	145	276	384	619	620
	145	276	384	619	620
	144	276	383	619	620
	144	276	383	619	619
	144	276	383	619	619
	144	275	383	618	619
	144	275	382	618	619
	144	275	381	618	618
	144	275	381	618	618
	144	275	381	617	618
	144	275	381	617	618
	144	274	381	617	617
	144	274	380	616	617
	144	274	380	616	616
	144	274	380	615	615
	144	274	380	615	615
	144	274	379	615	615
	144	274	379	614	614
	143	273	379	614	614
	143	273	379	614	614
	143	273	379	614	614
	143	273	379	613	614
	143	273	379	613	613
	143	272	379	613	613
	143	272	378	613	612
	143	272	378	612	612
	143	272	378	612	612
	143	272	378	612	612
	143	272	378	612	612
	143	272	377	611	612
	143	272	377	611	611
	143	272	377	611	611
	142	272	376	611	611
	142	271	376	610	610
	142	271	376	610	610
	142	271	376	610	610
	142	271	376	609	609
	142	271	376	609	609
	142	271	376	609	608
	142	271	376	608	608
	142	270	375	608	608
	142	270	375	608	607
	142	270	375	607	607
	142	270	375	607	607
	142	270	375	607	607
	142	270	374	607	607
	142	270	374	606	607
	142	270	374	606	606
	142	270	374	606	606
	142	270	374	606	606
	141	269	374	605	606
	141	269	373	605	606
	141	269	373	605	605
	141	269	373	605	605
	141	269	373	605	605
	141	269	373	604	604
	141	269	373	604	604
	141	269	373	604	604
	141	269	373	604	603
	141	268	373	603	603
	141	268	372	603	603
	141	268	372	603	602
	141	268	372	601	601
	141	268	372	600	601
	141	268	372	600	601
	141	267	372	600	600
	140	267	372	600	599
	140	267	371	599	599
	140	267	371	599	599
	140	266	371	598	598
	140	266	371	598	598
	140	266	371	598	598
	140	266	371	598	598
	140	266	371	597	598
	140	266	370	597	598
	140	265	370	597	597
	140	265	370	597	597
	140	265	370	597	597
	140	265	370	596	596
	140	265	370	596	596
	139	265	369	596	596
	139	265	369	595	595
	139	265	369	594	595
	139	265	369	594	594
	139	265	369	594	594
	139	265	369	594	594
	139	264	369	594	593
	139	264	369	593	593
	139	264	369	593	593
	139	264	368	593	593
	139	264	368	593	592
	139	264	368	593	592
	139	264	368	592	592
	139	264	368	592	591
	139	264	368	591	591
	139	264	368	590	590
	139	264	368	590	590
	139	264	368	590	590
	139	264	368	590	590
	139	264	367	590	589
	139	263	367	590	589
	138	263	367	589	589
	138	263	367	589	589
	138	263	367	589	589
	138	263	367	589	588
	138	262	367	588	588
	138	262	366	588	588
	138	261	366	588	588
	138	261	366	588	587
	137	261	366	588	587
	137	261	366	588	587
	137	261	366	587	587
	137	261	366	587	587
	137	261	366	587	586
	137	261	365	586	586
	137	261	365	586	586
	137	261	365	586	585
	137	261	364	585	585
	137	261	364	585	585
	137	261	364	584	584
	137	261	364	584	584
	137	261	364	584	584
	137	261	364	584	584
	136	261	364	584	584
	136	260	363	584	584
	136	260	363	583	583
	136	260	363	583	583
	136	260	363	583	583
	136	260	363	583	583
	136	260	363	582	583
	136	259	363	582	583
	136	259	362	582	582
	136	259	362	582	582
	136	259	362	582	582
	136	259	362	582	582
	136	259	362	582	582
	136	259	362	582	582
	136	259	362	581	581
	136	259	361	581	581
	136	259	361	581	581
	135	259	361	581	581
	135	259	361	580	580
	135	258	360	580	580
	135	258	360	580	580
	135	258	360	580	580
	135	258	360	580	580
	135	258	360	580	579
	135	258	360	579	579
	135	258	360	579	579
	135	258	360	578	579
	135	258	360	578	579
	135	258	360	578	578
	135	258	359	578	578
	135	257	359	578	578
	135	257	359	578	578
	135	257	359	578	577
	135	257	359	578	577
	135	257	359	577	577
	135	256	359	577	576
	135	256	358	576	576
	135	256	358	576	576
	135	256	358	576	576
	134	256	358	576	576
	134	256	358	576	576
	134	256	358	576	575
	134	256	358	576	575
	134	256	358	575	575
	134	256	357	574	574
	134	256	357	574	574
	134	255	357	574	574
	134	255	357	573	574
	134	255	357	573	573
	134	255	357	573	573
	134	255	357	573	572
	134	255	357	572	571
	134	255	356	572	571
	134	255	356	572	571
	134	255	356	571	570
	134	255	356	571	570
	134	254	356	570	570
	133	254	356	570	570
	133	254	356	570	570
	133	254	356	570	570
	133	254	355	570	570
	133	254	355	570	569
	133	254	355	569	569
	133	254	355	569	569
	133	254	355	569	569
	133	254	355	569	569
	133	254	354	568	569
	133	254	354	568	569
	133	253	354	568	568
	133	253	354	568	568
	133	253	354	568	568
	133	253	354	568	568
	133	253	353	568	568
	133	253	353	568	567
	133	253	353	567	566
	133	253	353	566	566
	133	253	353	566	566
	133	253	353	566	566
	133	253	353	565	566
	133	253	353	565	565
	133	253	353	565	565
	133	253	352	565	565
	133	252	352	565	565
	133	252	352	565	565
	133	252	352	564	564
	133	252	352	563	564
	132	252	352	563	564
	132	252	352	563	563
	132	252	351	563	563
	132	252	351	563	563
	132	252	351	563	563
	132	252	351	562	563
	132	252	351	562	562
	132	252	351	562	562
	132	251	351	561	562
	132	251	350	561	562
	132	251	350	560	561
	132	251	350	560	561
	132	251	349	560	560
	132	251	349	560	560
	132	251	349	560	560
	132	251	349	560	560
	132	250	349	560	560
	132	250	349	560	560
	132	250	349	560	559
	132	250	349	559	559
	131	250	349	559	559
	131	250	349	559	558
	131	250	348	558	558
	131	250	348	558	558
	131	250	348	558	558
	131	249	348	557	557
	131	249	348	557	557
	131	249	348	557	557
	131	249	348	557	556
	131	249	347	556	556
	131	249	347	556	556
	131	249	347	556	556
	131	249	346	556	556
	131	249	346	556	555
	131	249	346	555	555
	131	249	346	555	554
	131	248	346	555	554
	131	248	346	554	554
	131	248	346	554	553
	131	248	346	553	553
	131	248	346	553	553
	131	248	346	553	553
	130	248	345	552	552
	130	248	345	552	552
	130	247	345	552	552
	130	247	345	552	552
	130	247	345	551	551
	130	247	344	551	551
	130	247	344	551	551
	130	247	344	551	551
	130	247	344	550	551
	130	247	344	550	551
	130	247	344	550	550
	130	246	344	550	550
	130	246	343	549	550
	130	246	343	549	550
	130	246	343	549	549
	130	246	343	548	549
	130	246	343	548	549
	129	246	342	548	548
	129	246	342	548	548
	129	245	342	548	548
	129	245	342	548	548
	129	245	342	548	548
	129	245	342	548	547
	129	245	342	547	547
	129	245	342	547	547
	129	245	342	547	547
	129	245	342	547	546
	129	245	341	547	546
	129	245	341	547	546
	129	245	341	547	546
	129	245	341	546	546
	129	245	341	546	546
	129	244	341	546	546
	129	244	341	546	546
	129	244	341	546	546
	129	244	341	546	545
	129	244	340	546	545
	129	244	340	545	545
	129	244	340	545	545
	129	244	340	545	545
	128	244	340	545	545
	128	244	340	545	545
	128	244	340	544	544
	128	244	340	544	544
	128	244	340	544	544
	128	244	339	544	544
	128	244	339	544	544
	128	244	339	543	544
	128	244	339	543	543
	128	244	339	543	543
	128	244	339	543	543
	128	243	339	542	543
	128	243	339	542	543
	128	243	339	542	542
	128	243	338	541	541
	128	243	338	541	541
	127	243	338	541	541
	127	243	338	541	541
	127	242	338	540	541
	127	242	337	540	540
	127	242	337	540	540
	127	242	337	540	539
	127	242	337	540	539
	127	242	337	539	539
	127	242	337	539	539
	127	242	336	539	539
	127	242	336	539	539
	127	241	336	538	538
	127	241	336	538	538
	127	241	336	538	538
	127	241	336	538	538
	127	241	336	538	538
	127	241	335	538	538
	127	241	335	538	538
	127	241	335	538	538
	127	241	335	537	538
	127	241	335	537	537
	126	241	335	537	537
	126	241	335	536	536
	126	241	335	536	536
	126	240	335	536	536
	126	240	335	535	536
	126	240	334	535	536
	126	240	334	535	535
	126	240	334	535	535
	126	240	333	535	535
	126	240	333	535	535
	126	240	333	534	535
	126	240	333	534	534
	126	240	333	534	534
	126	240	333	534	534
	126	240	333	534	534
	126	240	332	534	534
	126	240	332	534	534
	126	240	332	534	534
	126	240	332	534	534
	126	240	332	534	534
	126	239	332	534	534
	126	239	332	533	533
	126	239	332	533	533
	125	239	332	533	533
	125	239	332	533	533
	125	239	331	532	533
	125	239	331	532	533
	125	238	331	532	532
	125	238	331	532	532
	125	238	331	532	532
	125	238	331	532	532
	125	238	331	531	532
	125	238	331	531	532
	125	238	330	531	532
	125	238	330	531	531
	125	237	330	531	531
	125	237	330	531	531
	125	237	329	531	531
	125	237	329	530	531
	125	237	329	530	531
	125	237	329	530	531
	125	237	329	530	531
	125	237	329	530	531
	125	237	329	530	531
	125	237	328	530	531
	125	237	328	530	531
	125	237	328	530	530
	125	237	328	529	530
	125	237	328	529	529
	125	237	328	529	529
	125	237	328	529	529
	125	237	328	529	529
	124	236	328	529	529
	124	236	328	529	529
	124	236	328	529	529
	124	236	327	528	528
	124	236	327	528	528
	124	236	327	528	528
	124	236	327	528	527
	124	235	327	527	527
	124	235	327	527	527
	124	235	327	526	527
	124	235	327	526	526
	124	235	327	525	526
	124	235	326	525	525
	124	235	326	525	525
	124	235	326	525	525
	124	235	326	525	525
	124	235	326	525	525
	124	235	325	525	524
	123	235	325	524	524
	123	235	325	524	524
	123	235	325	524	524
	123	235	325	524	524
	123	235	325	524	524
	123	235	324	524	524
	123	235	324	524	524
	123	235	324	524	523
	123	234	324	524	523
	123	234	324	523	523
	123	234	324	523	523
	123	234	324	523	523
	123	234	324	523	522
	123	234	324	522	522
	123	234	324	522	522
	123	234	324	522	522
	123	234	324	522	522
	123	234	324	522	522
	123	233	323	522	522
	123	233	323	521	521
	122	233	323	521	521
	122	233	323	521	521
	122	233	323	521	521
	122	233	323	521	520
	122	233	323	520	520
	122	233	323	520	520
	122	233	323	520	520
	122	233	322	520	520
	122	233	322	520	520
	122	232	322	520	519
	122	232	322	520	519
	122	232	322	520	519
	122	232	322	520	519
	122	232	322	520	519
	122	232	322	519	519
	122	232	322	519	519
	122	232	322	519	518
	122	232	322	518	518
	122	232	322	518	518
	122	232	322	518	518
	122	232	322	518	518
	122	232	321	518	518
	122	232	321	518	517
	122	232	321	518	517
	122	231	321	517	517
	122	231	321	517	517
	121	231	321	517	517
	121	231	321	517	517
	121	231	321	517	517
	121	231	321	517	517
	121	231	321	516	516
	121	231	321	516	516
	121	231	321	516	516
	121	231	320	516	516
	121	231	320	516	516
	121	231	320	516	516
	121	231	320	515	516
	121	230	320	515	516
	121	230	320	515	516
	121	230	320	515	516
	121	230	320	515	515
	121	230	319	515	515
	121	230	319	515	515
	121	230	319	514	514
	120	230	319	514	514
	120	229	319	514	514
	120	229	319	514	514
	120	229	319	514	514
	120	229	319	513	513
	120	229	319	513	513
	120	229	319	512	513
	120	229	319	512	513
	120	229	318	512	512
	120	229	318	512	512
	120	229	318	512	512
	120	229	318	512	512
	120	229	318	512	512
	120	229	318	512	512
	120	229	318	512	512
	120	229	318	511	511
	120	228	317	511	511
	120	228	317	511	511
	120	228	317	511	511
	120	228	317	511	511
	120	228	317	511	511
	120	228	317	511	511
	120	228	317	510	511
	120	228	317	510	510
	120	228	316	510	510
	119	228	316	510	510
	119	228	316	510	510
	119	228	316	510	510
	119	228	316	510	510
	119	228	316	510	510
	119	227	316	510	510
	119	227	316	510	510
	119	227	316	510	510
	119	227	316	509	509
	119	227	316	509	509
	119	227	316	509	509
	119	227	316	509	509
	119	227	316	509	509
	119	227	316	509	509
	119	227	316	509	509
	119	227	315	508	509
	119	227	315	508	508
	119	227	315	508	508
	119	227	315	508	508
	119	226	314	508	508
	119	226	314	508	508
	119	226	314	508	508
	119	226	314	508	508
	119	226	314	508	507
	119	226	314	508	507
	119	226	314	508	507
	119	226	314	507	507
	119	226	314	507	507
	119	226	314	507	507
	118	226	313	507	507
	118	226	313	507	507
	118	226	313	507	507
	118	226	313	507	507
	118	226	313	507	507
	118	225	313	507	507
	118	225	312	507	507
	118	225	312	507	506
	118	225	312	506	506
	118	225	312	506	506
	118	225	312	506	506
	118	225	312	506	506
	118	225	312	506	506
	118	225	312	506	506
	118	225	312	506	506
	118	225	312	506	505
	118	224	312	505	505
	118	224	312	505	505
	118	224	312	505	505
	118	224	311	505	505
	118	224	311	505	505
	118	224	311	505	505
	118	224	311	505	504
	118	224	311	504	504
	118	224	311	504	504
	118	224	311	504	504
	118	224	311	504	503
	118	224	311	503	503
	117	224	311	503	503
	117	224	311	503	503
	117	224	311	503	502
	117	224	311	503	502
	117	224	311	502	502
	117	223	310	502	502
	117	223	310	502	502
	117	223	310	502	502
	117	223	310	501	502
	117	223	310	501	501
	117	223	310	501	501
	117	223	310	501	501
	117	223	310	501	501
	117	223	310	501	501
	117	223	310	501	501
	117	223	310	501	501
	117	222	310	500	500
	117	222	310	500	500
	117	222	310	500	500
	117	222	310	500	500
	117	222	309	500	500
	117	222	309	500	500
	117	222	309	500	500
	117	222	309	500	500
	117	222	309	500	500
	117	222	309	499	500
	117	222	309	499	500
	117	222	309	499	500
	117	222	309	499	499
	117	222	308	499	499
	117	222	308	499	499
	116	222	308	499	499
	116	222	308	499	499
	116	222	308	499	499
	116	222	308	499	499
	116	221	308	499	499
	116	221	307	499	499
	116	221	307	499	499
	116	221	307	498	498
	116	221	307	498	498
	116	221	307	498	498
	116	221	307	498	498
	116	221	307	498	498
	116	221	307	498	497
	116	221	307	498	497
	116	221	306	497	497
	116	221	306	497	497
	116	220	306	497	497
	116	220	306	496	496
	116	220	306	496	496
	116	220	306	496	496
	116	220	306	496	496
	115	220	306	496	496
	115	220	306	496	496
	115	220	306	496	496
	115	220	306	496	496
	115	220	306	496	496
	115	220	305	496	495
	115	220	305	496	495
	115	220	305	495	495
	115	220	305	495	495
	115	220	305	495	495
	115	220	305	495	495
	115	220	305	495	495
	115	220	305	495	495
	115	220	305	495	495
	115	220	305	495	495
	115	219	305	495	495
	115	219	305	495	495
	115	219	305	494	493
	115	219	305	494	493
	115	219	304	493	493
	115	219	304	493	493
	115	219	304	493	493
	115	219	304	492	493
	115	219	304	492	493
	115	219	304	492	493
	115	219	304	492	492
	115	219	304	492	492
	115	219	304	492	492
	115	219	304	492	492
	115	219	303	492	492
	115	219	303	492	492
	115	219	303	492	492
	115	218	303	491	491
	115	218	303	491	491
	115	218	303	491	491
	115	218	303	491	491
	115	218	303	491	491
	115	218	303	491	490
	115	218	303	491	490
	114	218	303	490	490
	114	218	303	490	490
	114	218	303	490	490
	114	218	303	490	490
	114	218	303	490	490
	114	218	303	490	490
	114	218	302	489	490
	114	218	302	489	489
	114	218	302	489	489
	114	218	302	489	489
	114	217	302	489	489
	114	217	302	489	489
	114	217	302	489	489
	114	217	302	489	489
	114	217	302	488	488
	114	217	302	488	488
	114	217	302	488	488
	114	217	301	488	488
	114	217	301	488	488
	114	217	301	488	488
	114	217	301	488	488
	114	217	301	488	488
	114	217	301	488	488
	114	217	301	488	488
	114	217	301	488	488
	114	217	301	488	488
	114	217	301	488	488
	114	216	301	488	488
	113	216	301	487	487
	113	216	301	487	487
	113	216	300	487	487
	113	216	300	487	487
	113	216	300	487	487
	113	216	300	487	487
	113	216	300	487	487
	113	216	300	487	486
	113	216	300	486	486
	113	216	300	486	486
	113	216	300	486	486
	113	216	299	486	486
	113	216	299	486	485
	113	215	299	486	485
	113	215	299	486	485
	113	215	299	485	485
	113	215	299	485	484
	113	215	299	485	484
	113	215	299	485	484
	113	215	299	485	484
	113	215	299	485	484
	113	215	299	484	484
	113	215	299	484	484
	113	215	299	484	484
	113	215	299	484	484
	113	215	299	484	484
	113	215	299	484	483
	112	215	298	483	483
	112	215	298	483	483
	112	215	298	482	482
	112	215	298	482	482
	112	215	298	482	482
	112	214	298	482	482
	112	214	298	482	482
	112	214	298	482	482
	112	214	298	482	482
	112	214	298	482	482
	112	214	297	482	482
	112	214	297	481	481
	112	214	297	481	481
	112	214	297	481	481
	112	214	297	481	481
	112	214	297	481	481
	112	214	297	481	481
	112	214	297	481	481
	112	214	297	481	481
	112	213	297	481	481
	112	213	297	481	480
	112	213	297	481	480
	112	213	297	480	480
	112	213	296	480	480
	112	213	296	480	480
	112	213	296	480	480
	112	213	296	480	480
	112	213	296	480	480
	112	213	296	480	480
	112	213	296	479	480
	112	212	296	479	479
	112	212	296	479	479
	112	212	295	479	479
	112	212	295	479	479
	111	212	295	479	479
	111	212	295	479	478
	111	212	295	478	478
	111	212	295	478	478
	111	212	295	477	478
	111	212	295	477	477
	111	212	295	477	477
	111	212	295	477	477
	111	212	295	477	477
	111	212	295	477	477
	111	212	295	477	477
	111	212	295	476	477
	111	212	295	476	477
	111	212	295	476	477
	111	212	295	476	477
	111	212	295	476	477
	111	211	294	476	476
	111	211	294	476	476
	111	211	294	476	476
	111	211	294	476	476
	111	211	294	476	476
	111	211	294	476	476
	111	211	294	475	476
	111	211	294	475	475
	111	211	294	475	475
	111	211	293	475	475
	111	211	293	475	475
	111	211	293	475	475
	111	211	293	475	475
	111	211	293	475	475
	111	211	293	475	475
	111	210	293	475	474
	111	210	293	474	474
	110	210	293	474	474
	110	210	293	474	474
	110	210	293	474	474
	110	210	293	474	474
	110	210	293	474	474
	110	210	293	474	474
	110	210	292	474	473
	110	210	292	473	473
	110	210	292	473	473
	110	210	292	473	473
	110	210	292	473	472
	110	210	292	473	472
	110	210	292	473	472
	110	210	291	472	472
	110	210	291	472	472
	110	210	291	472	472
	110	209	291	472	472
	110	209	291	472	472
	110	209	291	472	472
	110	209	291	472	472
	110	209	291	472	472
	110	209	291	472	471
	110	209	291	472	471
	110	209	291	471	471
	110	209	291	471	471
	110	209	291	471	471
	110	209	291	471	471
	110	209	291	470	471
	110	209	291	470	470
	110	209	291	470	470
	110	209	291	470	470
	110	209	291	470	470
	110	209	291	470	470
	110	209	291	470	470
	110	209	290	470	470
	110	209	290	470	469
	110	209	290	469	469
	110	209	290	469	469
	110	208	290	469	469
	110	208	290	469	469
	110	208	290	469	469
	110	208	290	469	469
	110	208	290	468	469
	110	208	290	468	468
	110	208	290	468	468
	109	208	290	468	468
	109	208	290	468	468
	109	208	290	468	468
	109	208	290	468	468
	109	208	290	468	468
	109	208	289	468	468
	109	208	289	468	468
	109	208	289	468	468
	109	208	289	468	468
	109	208	289	468	468
	109	208	289	468	467
	109	208	289	467	467
	109	208	289	467	467
	109	208	289	467	467
	109	208	289	467	467
	109	208	289	466	466
	109	208	289	466	466
	109	208	289	466	466
	109	207	289	466	466
	109	207	288	466	466
	109	207	288	465	466
	109	207	288	465	466
	109	207	288	465	465
	109	207	288	465	465
	109	207	288	465	465
	109	207	288	465	465
	109	207	287	465	465
	109	207	287	465	465
	109	207	287	465	465
	109	207	287	465	465
	108	207	287	465	465
	108	207	287	465	464
	108	207	287	464	464
	108	207	287	464	464
	108	207	287	464	464
	108	206	287	464	464
	108	206	287	464	464
	108	206	287	464	464
	108	206	287	464	464
	108	206	287	464	464
	108	206	287	464	464
	108	206	286	464	464
	108	206	286	464	464
	108	206	286	464	464
	108	206	286	464	463
	108	206	286	463	463
	108	206	286	463	463
	108	206	286	463	463
	108	206	286	463	463
	108	206	286	463	463
	108	206	286	463	463
	108	206	286	463	463
	108	205	286	463	463
	108	205	286	463	463
	108	205	286	463	462
	108	205	285	462	462
	108	205	285	462	462
	108	205	285	462	462
	108	205	285	462	462
	108	205	285	462	462
	108	205	285	462	462
	108	205	285	462	462
	108	205	285	462	462
	108	205	285	462	462
	108	205	285	462	461
	108	205	285	462	461
	108	205	285	462	461
	108	205	285	461	461
	108	205	285	461	461
	108	205	285	461	461
	107	205	285	461	461
	107	205	285	461	461
	107	205	285	461	461
	107	205	285	461	461
	107	205	285	461	461
	107	205	285	460	461
	107	205	284	460	460
	107	205	284	460	460
	107	205	284	460	460
	107	205	284	460	460
	107	205	284	460	460
	107	205	284	460	460
	107	205	284	460	460
	107	205	284	460	460
	107	204	284	460	460
	107	204	284	460	460
	107	204	284	460	460
	107	204	284	460	459
	107	204	284	460	459
	107	204	284	459	459
	107	204	284	459	459
	107	204	283	459	459
	107	204	283	459	459
	107	204	283	459	459
	107	204	283	459	458
	107	204	283	459	458
	107	204	283	458	458
	107	204	283	458	458
	107	204	283	458	458
	107	204	283	458	458
	107	204	283	458	458
	107	204	283	458	458
	107	204	283	458	458
	107	204	283	458	458
	107	204	283	457	458
	107	204	283	457	458
	107	204	282	457	458
	107	204	282	457	458
	107	203	282	457	457
	107	203	282	457	457
	107	203	282	457	457
	107	203	282	457	456
	106	203	282	456	456
	106	203	282	456	456
	106	203	282	456	456
	106	203	282	456	456
	106	203	282	456	456
	106	203	282	456	456
	106	203	282	456	456
	106	203	282	456	456
	106	203	282	456	456
	106	203	282	456	456
	106	203	282	455	456
	106	203	282	455	456
	106	203	281	455	455
	106	203	281	455	455
	106	203	281	455	455
	106	203	281	455	455
	106	203	281	455	455
	106	203	281	455	455
	106	203	281	454	455
	106	203	281	454	455
	106	203	281	454	454
	106	203	281	454	454
	106	203	281	454	454
	106	203	281	454	454
	106	203	281	454	454
	106	203	281	454	454
	106	202	281	454	454
	106	202	281	454	453
	106	202	281	453	453
	106	202	281	453	453
	106	202	281	453	453
	106	202	280	453	453
	106	202	280	453	453
	106	202	280	453	453
	106	202	280	453	453
	106	202	280	453	453
	106	202	280	453	453
	106	202	280	452	453
	106	202	280	452	453
	106	202	280	452	453
	106	202	280	452	453
	106	202	280	452	452
	106	202	280	452	452
	106	202	280	452	452
	106	202	280	452	452
	106	202	280	452	452
	106	202	280	452	452
	106	202	280	452	452
	106	202	280	452	452
	106	202	280	451	452
	106	202	280	451	451
	106	202	280	451	451
	106	202	279	451	451
	106	202	279	451	451
	105	201	279	451	451
	105	201	279	451	451
	105	201	279	451	451
	105	201	279	451	451
	105	201	279	451	451
	105	201	279	451	451
	105	201	279	451	451
	105	201	279	451	451
	105	201	279	451	451
	105	201	279	450	451
	105	201	279	450	451
	105	201	279	450	451
	105	201	279	450	451
	105	201	279	450	450
	105	201	279	450	450
	105	201	279	450	450
	105	201	279	450	450
	105	201	279	450	450
	105	201	279	450	450
	105	201	279	450	450
	105	201	279	450	450
	105	201	279	450	449
	105	201	279	450	449
	105	201	278	450	449
	105	201	278	449	449
	105	201	278	449	449
	105	200	278	449	449
	105	200	278	449	449
	105	200	278	449	449
	105	200	278	449	449
	105	200	278	449	449
	105	200	278	449	449
	105	200	278	449	449
	105	200	278	449	449
	105	200	278	449	449
	105	200	278	448	449
	104	200	278	448	449
	104	200	277	448	449
	104	200	277	448	448
	104	200	277	448	448
	104	200	277	448	448
	104	200	277	448	448
	104	200	277	448	448
	104	200	277	448	448
	104	200	277	448	448
	104	200	277	448	448
	104	200	277	448	448
	104	200	277	448	448
	104	200	277	448	448
	104	200	277	448	448
	104	200	277	448	448
	104	200	277	447	447
	104	200	277	447	447
	104	200	277	447	447
	104	200	277	447	447
	104	200	276	447	447
	104	200	276	447	447
	104	199	276	447	447
	104	199	276	447	447
	104	199	276	447	446
	104	199	276	447	446
	104	199	276	447	446
	104	199	276	447	446
	104	199	276	446	446
	104	199	276	446	446
	104	199	276	446	446
	104	199	276	446	446
	104	199	276	446	446
	104	199	276	446	446
	104	199	276	446	446
	104	199	276	446	446
	104	199	276	445	446
	104	199	276	445	446
	104	199	275	445	445
	104	199	275	445	445
	104	199	275	445	445
	104	199	275	445	445
	104	199	275	445	445
	104	199	275	445	445
	104	199	275	445	445
	104	199	275	445	445
	104	198	275	444	444
	104	198	275	444	444
	104	198	275	444	444
	104	198	275	444	444
	104	198	275	444	444
	104	198	275	444	444
	104	198	275	444	444
	104	198	275	444	444
	104	198	275	444	444
	104	198	275	443	444
	104	198	275	443	444
	104	198	275	443	444
	104	198	275	443	443
	103	198	275	443	443
	103	198	275	443	443
	103	198	275	443	443
	103	198	274	443	442
	103	198	274	443	442
	103	198	274	442	442
	103	198	274	442	442
	103	198	274	442	442
	103	198	274	442	442
	103	197	274	442	442
	103	197	274	442	442
	103	197	274	442	442
	103	197	274	442	442
	103	197	274	442	442
	103	197	274	442	441
	103	197	274	441	441
	103	197	273	441	441
	103	197	273	441	441
	103	197	273	441	441
	103	197	273	441	441
	103	197	273	441	441
	103	197	273	441	441
	103	197	273	441	440
	103	197	273	441	440
	103	197	273	441	440
	103	197	273	441	440
	103	197	273	440	440
	103	197	273	440	440
	103	197	273	440	440
	103	197	273	440	440
	103	197	273	440	440
	103	197	273	440	440
	103	197	273	440	440
	103	197	273	440	440
	103	197	273	440	440
	103	197	273	440	440
	103	197	273	440	440
	103	197	273	440	440
	103	197	272	440	439
	103	196	272	439	439
	103	196	272	439	439
	103	196	272	439	439
	103	196	272	439	439
	103	196	272	439	439
	102	196	272	439	439
	102	196	272	439	439
	102	196	272	439	439
	102	196	272	439	439
	102	196	272	439	439
	102	196	272	439	439
	102	196	272	439	439
	102	196	272	439	439
	102	196	272	439	439
	102	196	272	439	439
	102	196	271	439	439
	102	196	271	438	439
	102	196	271	438	439
	102	196	271	438	439
	102	196	271	438	439
	102	195	271	438	438
	102	195	271	438	438
	102	195	271	438	438
	102	195	271	438	438
	102	195	271	438	438
	102	195	271	438	438
	102	195	271	438	438
	102	195	271	438	438
	102	195	271	438	438
	102	195	271	438	438
	102	195	271	437	438
	102	195	271	437	437
	102	195	271	437	437
	102	195	271	437	437
	102	195	271	437	437
	102	195	271	437	437
	102	195	271	437	437
	102	195	271	437	437
	102	195	271	437	437
	102	195	270	437	437
	102	195	270	437	437
	102	194	270	436	437
	102	194	270	436	437
	101	194	270	436	436
	101	194	270	436	436
	101	194	270	436	436
	101	194	270	436	436
	101	194	270	436	436
	101	194	270	436	436
	101	194	270	436	436
	101	194	270	436	436
	101	194	270	436	435
	101	194	270	436	435
	101	194	270	436	435
	101	194	269	436	435
	101	194	269	435	435
	101	194	269	435	435
	101	194	269	435	435
	101	194	269	435	435
	101	194	269	435	435
	101	194	269	435	435
	101	193	269	435	435
	101	193	269	435	435
	101	193	269	435	435
	101	193	269	435	434
	101	193	269	435	434
	101	193	269	435	434
	101	193	269	434	434
	101	193	269	434	434
	101	193	269	434	434
	101	193	269	434	434
	101	193	269	434	434
	101	193	269	434	434
	101	193	269	434	434
	101	193	269	434	433
	101	193	269	434	433
	101	193	269	433	433
	101	193	269	433	433
	101	193	269	433	433
	101	193	269	433	433
	101	193	269	433	433
	101	193	269	433	433
	101	193	269	433	433
	101	193	268	433	433
	101	193	268	433	433
	101	193	268	433	433
	101	193	268	433	433
	101	193	268	433	433
	101	193	268	433	433
	101	193	268	433	433
	101	192	268	433	432
	101	192	268	433	432
	101	192	268	432	432
	101	192	268	432	432
	101	192	268	432	432
	101	192	268	432	432
	101	192	268	432	432
	101	192	268	432	432
	101	192	268	432	432
	100	192	268	432	432
	100	192	267	432	432
	100	192	267	432	432
	100	192	267	432	432
	100	192	267	432	432
	100	192	267	432	432
	100	192	267	431	432
	100	192	267	431	431
	100	192	267	431	431
	100	192	267	431	431
	100	192	266	431	431
	100	192	266	431	431
	100	192	266	431	431
	100	192	266	431	431
	100	191	266	431	431
	100	191	266	431	431
	100	191	266	430	430
	100	191	266	430	430
	100	191	266	430	430
	100	191	266	430	430
	100	191	266	430	430
	100	191	266	430	430
	100	191	266	430	430
	100	191	266	430	430
	100	191	266	430	430
	100	191	266	429	430
	100	191	266	429	429
	100	191	265	429	429
	100	191	265	429	429
	100	191	265	429	429
	100	191	265	429	429
	100	191	265	429	429
	100	191	265	429	429
	100	191	265	429	429
	100	191	265	429	429
	100	191	265	429	429
	100	191	265	429	429
	100	191	265	429	429
	100	191	265	429	429
	100	191	265	429	428
	100	191	265	429	428
	100	191	265	428	428
	100	191	265	428	428
	100	191	265	428	428
	100	191	265	428	428
	100	191	264	428	428
	100	191	264	428	428
	100	191	264	428	428
	100	191	264	428	427
	100	190	264	428	427
	100	190	264	428	427
	100	190	264	427	427
	100	190	264	427	427
	100	190	264	427	427
	100	190	264	427	427
	100	190	264	427	427
	99	190	264	427	427
	99	190	264	427	427
	99	190	264	427	427
	99	190	264	427	427
	99	190	264	427	427
	99	190	264	427	427
	99	190	264	427	427
	99	190	264	427	427
	99	190	264	427	427
	99	190	264	427	427
	99	190	264	427	427
	99	190	264	427	427
	99	190	264	427	426
	99	190	264	426	426
	99	190	263	426	426
	99	190	263	426	426
	99	190	263	426	426
	99	190	263	426	426
	99	190	263	426	426
[truncated: 62,386 more rows]
