# Supplementary material for: An improved bacterial single-cell RNA-seq reveals biofilm heterogeneity
Source: eLife. 2024 Dec 17;13:RP97543. doi: 10.7554/eLife.97543 (PMC11651652; doi:10.7554/eLife.97543)
Supplement: Figure 1—source data 1. [file elife-97543-fig1-data1.xls]

## Sheet: Figure 1B
Non-rRNA and rRNA Ratio(%)	PETRI-seq(E. coli)	MicroSPLiT(E. coli)	M3-seq(E. coli)	BacDrop-seq(K. pneumoniae)	MATQ-DASH(Salmonella)	E. coli Ctrl	E. coli ΔΔ	S. aureus Ctrl	S. aureus ΔΔ	C. crescentus Ctrl	C. crescentus ΔΔ		Fig. 1B
	0.05	0.07	0.65	0.61	0.3	0.0836	0.763	0.1014	0.8875	0.039	0.55
						0.0808	0.816	0.0987	0.9579	0.0391	0.5766
										0.0383	0.5012

## Sheet: Figure 1C
Data of UMIs	PETRI (0427-3)			RiboD-PETRI (0615-2)				Fig. 1C
	Top 1000	Top 5000	Top 10000	Top 1000	Top 5000	Top 10000		The median of UMIs of PETRI
	239	239	239	1141	1141	1141		Top 1000	Top 5000	Top 10000
	218	218	218	1061	1061	1061		38	21	15
	170	170	170	873	873	873
	159	159	159	685	685	685		The median of UMIs of RiboD-PETRI
	156	156	156	662	662	662		Top 1000	Top 5000	Top 10000
	156	156	156	607	607	607		139	79	58
	154	154	154	548	548	548
	150	150	150	544	544	544
	141	141	141	535	535	535
	141	141	141	524	524	524
	133	133	133	507	507	507
	130	130	130	470	470	470
	128	128	128	462	462	462
	118	118	118	446	446	446
	117	117	117	443	443	443
	115	115	115	441	441	441
	112	112	112	423	423	423
	105	105	105	422	422	422
	104	104	104	410	410	410
	103	103	103	399	399	399
	100	100	100	387	387	387
	98	98	98	380	380	380
	98	98	98	378	378	378
	98	98	98	376	376	376
	97	97	97	366	366	366
	96	96	96	360	360	360
	95	95	95	360	360	360
	94	94	94	350	350	350
	93	93	93	346	346	346
	93	93	93	343	343	343
	92	92	92	340	340	340
	90	90	90	332	332	332
	89	89	89	330	330	330
	88	88	88	330	330	330
	88	88	88	329	329	329
	88	88	88	323	323	323
	87	87	87	323	323	323
	87	87	87	322	322	322
	86	86	86	322	322	322
	85	85	85	316	316	316
	85	85	85	316	316	316
	84	84	84	313	313	313
	82	82	82	312	312	312
	81	81	81	311	311	311
	81	81	81	305	305	305
	79	79	79	302	302	302
	79	79	79	300	300	300
	78	78	78	299	299	299
	78	78	78	299	299	299
	77	77	77	298	298	298
	77	77	77	292	292	292
	77	77	77	290	290	290
	76	76	76	289	289	289
	75	75	75	285	285	285
	75	75	75	284	284	284
	75	75	75	283	283	283
	75	75	75	283	283	283
	74	74	74	279	279	279
	74	74	74	276	276	276
	74	74	74	275	275	275
	74	74	74	275	275	275
	74	74	74	275	275	275
	74	74	74	270	270	270
	73	73	73	268	268	268
	73	73	73	267	267	267
	73	73	73	265	265	265
	73	73	73	261	261	261
	73	73	73	260	260	260
	72	72	72	260	260	260
	72	72	72	258	258	258
	72	72	72	258	258	258
	72	72	72	258	258	258
	72	72	72	257	257	257
	71	71	71	256	256	256
	71	71	71	255	255	255
	71	71	71	255	255	255
	70	70	70	254	254	254
	69	69	69	251	251	251
	69	69	69	249	249	249
	68	68	68	249	249	249
	68	68	68	248	248	248
	67	67	67	248	248	248
	67	67	67	247	247	247
	67	67	67	247	247	247
	66	66	66	244	244	244
	66	66	66	244	244	244
	66	66	66	243	243	243
	66	66	66	243	243	243
	65	65	65	241	241	241
	65	65	65	241	241	241
	65	65	65	241	241	241
	65	65	65	239	239	239
	64	64	64	237	237	237
	64	64	64	236	236	236
	64	64	64	235	235	235
	64	64	64	235	235	235
	63	63	63	235	235	235
	63	63	63	232	232	232
	63	63	63	231	231	231
	63	63	63	228	228	228
	63	63	63	227	227	227
	63	63	63	227	227	227
	63	63	63	227	227	227
	62	62	62	227	227	227
	62	62	62	226	226	226
	62	62	62	226	226	226
	62	62	62	225	225	225
	62	62	62	225	225	225
	62	62	62	225	225	225
	61	61	61	225	225	225
	61	61	61	224	224	224
	61	61	61	223	223	223
	61	61	61	223	223	223
	61	61	61	223	223	223
	61	61	61	222	222	222
	60	60	60	222	222	222
	60	60	60	221	221	221
	60	60	60	220	220	220
	60	60	60	220	220	220
	60	60	60	220	220	220
	59	59	59	219	219	219
	59	59	59	218	218	218
	59	59	59	217	217	217
	59	59	59	216	216	216
	59	59	59	215	215	215
	58	58	58	215	215	215
	58	58	58	213	213	213
	58	58	58	213	213	213
	58	58	58	213	213	213
	58	58	58	212	212	212
	58	58	58	212	212	212
	57	57	57	212	212	212
	57	57	57	212	212	212
	57	57	57	211	211	211
	57	57	57	211	211	211
	57	57	57	211	211	211
	57	57	57	211	211	211
	56	56	56	210	210	210
	56	56	56	210	210	210
	56	56	56	210	210	210
	56	56	56	210	210	210
	56	56	56	209	209	209
	56	56	56	209	209	209
	56	56	56	208	208	208
	56	56	56	208	208	208
	55	55	55	207	207	207
	55	55	55	207	207	207
	55	55	55	206	206	206
	55	55	55	205	205	205
	55	55	55	204	204	204
	55	55	55	204	204	204
	55	55	55	203	203	203
	55	55	55	203	203	203
	55	55	55	203	203	203
	54	54	54	203	203	203
	54	54	54	202	202	202
	54	54	54	201	201	201
	54	54	54	201	201	201
	54	54	54	201	201	201
	54	54	54	201	201	201
	54	54	54	201	201	201
	54	54	54	201	201	201
	54	54	54	201	201	201
	54	54	54	201	201	201
	54	54	54	200	200	200
	53	53	53	200	200	200
	53	53	53	199	199	199
	53	53	53	198	198	198
	53	53	53	198	198	198
	53	53	53	198	198	198
	52	52	52	197	197	197
	52	52	52	197	197	197
	52	52	52	197	197	197
	52	52	52	197	197	197
	52	52	52	197	197	197
	52	52	52	196	196	196
	52	52	52	196	196	196
	52	52	52	196	196	196
	52	52	52	196	196	196
	52	52	52	196	196	196
	51	51	51	195	195	195
	51	51	51	195	195	195
	51	51	51	195	195	195
	51	51	51	195	195	195
	51	51	51	195	195	195
	51	51	51	193	193	193
	51	51	51	193	193	193
	51	51	51	193	193	193
	51	51	51	192	192	192
	51	51	51	192	192	192
	51	51	51	191	191	191
	51	51	51	191	191	191
	51	51	51	191	191	191
	50	50	50	190	190	190
	50	50	50	190	190	190
	50	50	50	190	190	190
	50	50	50	189	189	189
	50	50	50	189	189	189
	50	50	50	188	188	188
	50	50	50	188	188	188
	50	50	50	187	187	187
	50	50	50	186	186	186
	50	50	50	186	186	186
	50	50	50	186	186	186
	49	49	49	186	186	186
	49	49	49	185	185	185
	49	49	49	185	185	185
	49	49	49	185	185	185
	49	49	49	185	185	185
	49	49	49	185	185	185
	49	49	49	184	184	184
	49	49	49	184	184	184
	49	49	49	184	184	184
	49	49	49	184	184	184
	49	49	49	184	184	184
	49	49	49	184	184	184
	49	49	49	184	184	184
	49	49	49	184	184	184
	49	49	49	183	183	183
	49	49	49	183	183	183
	49	49	49	182	182	182
	49	49	49	182	182	182
	49	49	49	182	182	182
	49	49	49	182	182	182
	49	49	49	182	182	182
	49	49	49	182	182	182
	49	49	49	181	181	181
	48	48	48	181	181	181
	48	48	48	181	181	181
	48	48	48	180	180	180
	48	48	48	180	180	180
	48	48	48	180	180	180
	48	48	48	180	180	180
	48	48	48	180	180	180
	48	48	48	179	179	179
	48	48	48	179	179	179
	48	48	48	179	179	179
	48	48	48	178	178	178
	48	48	48	178	178	178
	48	48	48	177	177	177
	48	48	48	177	177	177
	47	47	47	177	177	177
	47	47	47	177	177	177
	47	47	47	177	177	177
	47	47	47	177	177	177
	47	47	47	177	177	177
	47	47	47	177	177	177
	47	47	47	176	176	176
	47	47	47	176	176	176
	47	47	47	176	176	176
	47	47	47	176	176	176
	47	47	47	176	176	176
	47	47	47	176	176	176
	47	47	47	175	175	175
	47	47	47	175	175	175
	47	47	47	175	175	175
	47	47	47	175	175	175
	47	47	47	175	175	175
	47	47	47	175	175	175
	46	46	46	174	174	174
	46	46	46	174	174	174
	46	46	46	174	174	174
	46	46	46	174	174	174
	46	46	46	174	174	174
	46	46	46	174	174	174
	46	46	46	173	173	173
	46	46	46	173	173	173
	46	46	46	173	173	173
	46	46	46	173	173	173
	46	46	46	173	173	173
	46	46	46	173	173	173
	46	46	46	173	173	173
	46	46	46	173	173	173
	46	46	46	173	173	173
	46	46	46	172	172	172
	46	46	46	172	172	172
	46	46	46	172	172	172
	46	46	46	172	172	172
	46	46	46	171	171	171
	46	46	46	171	171	171
	45	45	45	171	171	171
	45	45	45	171	171	171
	45	45	45	170	170	170
	45	45	45	170	170	170
	45	45	45	170	170	170
	45	45	45	170	170	170
	45	45	45	169	169	169
	45	45	45	169	169	169
	45	45	45	169	169	169
	45	45	45	168	168	168
	45	45	45	168	168	168
	45	45	45	168	168	168
	45	45	45	168	168	168
	45	45	45	167	167	167
	44	44	44	167	167	167
	44	44	44	167	167	167
	44	44	44	167	167	167
	44	44	44	167	167	167
	44	44	44	166	166	166
	44	44	44	166	166	166
	44	44	44	166	166	166
	44	44	44	166	166	166
	44	44	44	165	165	165
	44	44	44	165	165	165
	44	44	44	165	165	165
	44	44	44	165	165	165
	44	44	44	164	164	164
	44	44	44	164	164	164
	44	44	44	164	164	164
	44	44	44	164	164	164
	44	44	44	164	164	164
	44	44	44	163	163	163
	44	44	44	163	163	163
	44	44	44	163	163	163
	44	44	44	162	162	162
	44	44	44	162	162	162
	44	44	44	162	162	162
	43	43	43	162	162	162
	43	43	43	162	162	162
	43	43	43	161	161	161
	43	43	43	161	161	161
	43	43	43	160	160	160
	43	43	43	160	160	160
	43	43	43	160	160	160
	43	43	43	160	160	160
	43	43	43	160	160	160
	43	43	43	160	160	160
	43	43	43	160	160	160
	43	43	43	160	160	160
	43	43	43	160	160	160
	43	43	43	159	159	159
	43	43	43	159	159	159
	43	43	43	159	159	159
	43	43	43	158	158	158
	43	43	43	158	158	158
	43	43	43	158	158	158
	43	43	43	158	158	158
	43	43	43	158	158	158
	43	43	43	157	157	157
	43	43	43	157	157	157
	43	43	43	157	157	157
	43	43	43	157	157	157
	43	43	43	157	157	157
	42	42	42	157	157	157
	42	42	42	157	157	157
	42	42	42	157	157	157
	42	42	42	156	156	156
	42	42	42	156	156	156
	42	42	42	156	156	156
	42	42	42	156	156	156
	42	42	42	156	156	156
	42	42	42	155	155	155
	42	42	42	155	155	155
	42	42	42	155	155	155
	42	42	42	155	155	155
	42	42	42	155	155	155
	42	42	42	155	155	155
	42	42	42	155	155	155
	42	42	42	155	155	155
	42	42	42	154	154	154
	42	42	42	154	154	154
	42	42	42	154	154	154
	42	42	42	154	154	154
	42	42	42	154	154	154
	42	42	42	154	154	154
	42	42	42	154	154	154
	42	42	42	154	154	154
	41	41	41	154	154	154
	41	41	41	154	154	154
	41	41	41	154	154	154
	41	41	41	153	153	153
	41	41	41	153	153	153
	41	41	41	153	153	153
	41	41	41	153	153	153
	41	41	41	153	153	153
	41	41	41	153	153	153
	41	41	41	153	153	153
	41	41	41	153	153	153
	41	41	41	152	152	152
	41	41	41	152	152	152
	41	41	41	152	152	152
	41	41	41	152	152	152
	41	41	41	152	152	152
	41	41	41	152	152	152
	41	41	41	152	152	152
	41	41	41	152	152	152
	41	41	41	152	152	152
	41	41	41	152	152	152
	41	41	41	151	151	151
	41	41	41	151	151	151
	41	41	41	151	151	151
	41	41	41	151	151	151
	41	41	41	151	151	151
	41	41	41	151	151	151
	41	41	41	151	151	151
	40	40	40	151	151	151
	40	40	40	150	150	150
	40	40	40	150	150	150
	40	40	40	150	150	150
	40	40	40	150	150	150
	40	40	40	150	150	150
	40	40	40	149	149	149
	40	40	40	149	149	149
	40	40	40	149	149	149
	40	40	40	149	149	149
	40	40	40	149	149	149
	40	40	40	149	149	149
	40	40	40	149	149	149
	40	40	40	149	149	149
	40	40	40	149	149	149
	40	40	40	148	148	148
	40	40	40	148	148	148
	40	40	40	148	148	148
	40	40	40	148	148	148
	40	40	40	148	148	148
	40	40	40	148	148	148
	40	40	40	148	148	148
	40	40	40	148	148	148
	40	40	40	148	148	148
	40	40	40	147	147	147
	40	40	40	147	147	147
	40	40	40	147	147	147
	40	40	40	147	147	147
	40	40	40	147	147	147
	40	40	40	147	147	147
	40	40	40	147	147	147
	40	40	40	146	146	146
	39	39	39	146	146	146
	39	39	39	146	146	146
	39	39	39	146	146	146
	39	39	39	146	146	146
	39	39	39	146	146	146
	39	39	39	146	146	146
	39	39	39	146	146	146
	39	39	39	146	146	146
	39	39	39	146	146	146
	39	39	39	145	145	145
	39	39	39	145	145	145
	39	39	39	145	145	145
	39	39	39	145	145	145
	39	39	39	145	145	145
	39	39	39	145	145	145
	39	39	39	145	145	145
	39	39	39	144	144	144
	39	39	39	144	144	144
	39	39	39	144	144	144
	39	39	39	144	144	144
	39	39	39	144	144	144
	39	39	39	144	144	144
	39	39	39	144	144	144
	39	39	39	144	144	144
	39	39	39	144	144	144
	39	39	39	144	144	144
	39	39	39	144	144	144
	39	39	39	143	143	143
	39	39	39	143	143	143
	39	39	39	143	143	143
	38	38	38	143	143	143
	38	38	38	143	143	143
	38	38	38	143	143	143
	38	38	38	143	143	143
	38	38	38	143	143	143
	38	38	38	143	143	143
	38	38	38	143	143	143
	38	38	38	142	142	142
	38	38	38	142	142	142
	38	38	38	142	142	142
	38	38	38	142	142	142
	38	38	38	142	142	142
	38	38	38	142	142	142
	38	38	38	142	142	142
	38	38	38	142	142	142
	38	38	38	142	142	142
	38	38	38	142	142	142
	38	38	38	142	142	142
	38	38	38	142	142	142
	38	38	38	142	142	142
	38	38	38	141	141	141
	38	38	38	141	141	141
	38	38	38	141	141	141
	38	38	38	141	141	141
	38	38	38	141	141	141
	38	38	38	141	141	141
	38	38	38	141	141	141
	38	38	38	141	141	141
	38	38	38	141	141	141
	38	38	38	141	141	141
	38	38	38	141	141	141
	38	38	38	141	141	141
	38	38	38	141	141	141
	38	38	38	141	141	141
	38	38	38	140	140	140
	38	38	38	140	140	140
	38	38	38	140	140	140
	38	38	38	140	140	140
	38	38	38	140	140	140
	38	38	38	140	140	140
	38	38	38	139	139	139
	38	38	38	139	139	139
	38	38	38	139	139	139
	38	38	38	139	139	139
	38	38	38	139	139	139
	38	38	38	139	139	139
	37	37	37	139	139	139
	37	37	37	139	139	139
	37	37	37	139	139	139
	37	37	37	139	139	139
	37	37	37	139	139	139
	37	37	37	139	139	139
	37	37	37	138	138	138
	37	37	37	138	138	138
	37	37	37	138	138	138
	37	37	37	138	138	138
	37	37	37	138	138	138
	37	37	37	138	138	138
	37	37	37	138	138	138
	37	37	37	138	138	138
	37	37	37	138	138	138
	37	37	37	138	138	138
	37	37	37	138	138	138
	37	37	37	137	137	137
	37	37	37	137	137	137
	37	37	37	137	137	137
	37	37	37	137	137	137
	37	37	37	137	137	137
	37	37	37	137	137	137
	37	37	37	137	137	137
	37	37	37	137	137	137
	37	37	37	137	137	137
	37	37	37	137	137	137
	37	37	37	137	137	137
	37	37	37	137	137	137
	37	37	37	137	137	137
	37	37	37	136	136	136
	37	37	37	136	136	136
	36	36	36	136	136	136
	36	36	36	136	136	136
	36	36	36	136	136	136
	36	36	36	136	136	136
	36	36	36	136	136	136
	36	36	36	136	136	136
	36	36	36	136	136	136
	36	36	36	136	136	136
	36	36	36	136	136	136
	36	36	36	136	136	136
	36	36	36	136	136	136
	36	36	36	136	136	136
	36	36	36	136	136	136
	36	36	36	135	135	135
	36	36	36	135	135	135
	36	36	36	135	135	135
	36	36	36	135	135	135
	36	36	36	135	135	135
	36	36	36	135	135	135
	36	36	36	135	135	135
	36	36	36	135	135	135
	36	36	36	134	134	134
	36	36	36	134	134	134
	36	36	36	134	134	134
	36	36	36	134	134	134
	36	36	36	134	134	134
	36	36	36	134	134	134
	36	36	36	134	134	134
	36	36	36	134	134	134
	36	36	36	134	134	134
	36	36	36	134	134	134
	36	36	36	134	134	134
	36	36	36	134	134	134
	36	36	36	134	134	134
	36	36	36	134	134	134
	36	36	36	133	133	133
	36	36	36	133	133	133
	36	36	36	133	133	133
	36	36	36	133	133	133
	36	36	36	133	133	133
	36	36	36	133	133	133
	36	36	36	133	133	133
	36	36	36	133	133	133
	36	36	36	133	133	133
	35	35	35	133	133	133
	35	35	35	133	133	133
	35	35	35	133	133	133
	35	35	35	132	132	132
	35	35	35	132	132	132
	35	35	35	132	132	132
	35	35	35	132	132	132
	35	35	35	132	132	132
	35	35	35	132	132	132
	35	35	35	132	132	132
	35	35	35	132	132	132
	35	35	35	132	132	132
	35	35	35	132	132	132
	35	35	35	132	132	132
	35	35	35	132	132	132
	35	35	35	131	131	131
	35	35	35	131	131	131
	35	35	35	131	131	131
	35	35	35	131	131	131
	35	35	35	131	131	131
	35	35	35	131	131	131
	35	35	35	131	131	131
	35	35	35	131	131	131
	35	35	35	131	131	131
	35	35	35	131	131	131
	35	35	35	131	131	131
	35	35	35	131	131	131
	35	35	35	131	131	131
	35	35	35	131	131	131
	35	35	35	130	130	130
	35	35	35	130	130	130
	35	35	35	130	130	130
	35	35	35	130	130	130
	35	35	35	130	130	130
	35	35	35	130	130	130
	35	35	35	130	130	130
	35	35	35	130	130	130
	35	35	35	130	130	130
	35	35	35	130	130	130
	35	35	35	130	130	130
	35	35	35	130	130	130
	35	35	35	129	129	129
	35	35	35	129	129	129
	35	35	35	129	129	129
	35	35	35	129	129	129
	35	35	35	129	129	129
	35	35	35	129	129	129
	35	35	35	129	129	129
	35	35	35	129	129	129
	35	35	35	129	129	129
	35	35	35	129	129	129
	35	35	35	129	129	129
	35	35	35	129	129	129
	35	35	35	129	129	129
	35	35	35	129	129	129
	35	35	35	129	129	129
	35	35	35	129	129	129
	35	35	35	129	129	129
	35	35	35	129	129	129
	35	35	35	128	128	128
	35	35	35	128	128	128
	35	35	35	128	128	128
	35	35	35	128	128	128
	35	35	35	128	128	128
	35	35	35	128	128	128
	34	34	34	128	128	128
	34	34	34	128	128	128
	34	34	34	128	128	128
	34	34	34	128	128	128
	34	34	34	128	128	128
	34	34	34	128	128	128
	34	34	34	128	128	128
	34	34	34	128	128	128
	34	34	34	128	128	128
	34	34	34	128	128	128
	34	34	34	128	128	128
	34	34	34	127	127	127
	34	34	34	127	127	127
	34	34	34	127	127	127
	34	34	34	127	127	127
	34	34	34	127	127	127
	34	34	34	127	127	127
	34	34	34	127	127	127
	34	34	34	127	127	127
	34	34	34	127	127	127
	34	34	34	127	127	127
	34	34	34	127	127	127
	34	34	34	127	127	127
	34	34	34	127	127	127
	34	34	34	127	127	127
	34	34	34	127	127	127
	34	34	34	127	127	127
	34	34	34	127	127	127
	34	34	34	127	127	127
	34	34	34	127	127	127
	34	34	34	127	127	127
	34	34	34	126	126	126
	34	34	34	126	126	126
	34	34	34	126	126	126
	34	34	34	126	126	126
	34	34	34	126	126	126
	34	34	34	126	126	126
	34	34	34	126	126	126
	34	34	34	126	126	126
	34	34	34	126	126	126
	34	34	34	126	126	126
	34	34	34	126	126	126
	34	34	34	126	126	126
	34	34	34	126	126	126
	34	34	34	126	126	126
	34	34	34	126	126	126
	34	34	34	126	126	126
	34	34	34	125	125	125
	34	34	34	125	125	125
	34	34	34	125	125	125
	34	34	34	125	125	125
	34	34	34	125	125	125
	34	34	34	125	125	125
	34	34	34	125	125	125
	34	34	34	125	125	125
	34	34	34	125	125	125
	34	34	34	125	125	125
	34	34	34	125	125	125
	33	33	33	125	125	125
	33	33	33	125	125	125
	33	33	33	125	125	125
	33	33	33	125	125	125
	33	33	33	125	125	125
	33	33	33	125	125	125
	33	33	33	125	125	125
	33	33	33	125	125	125
	33	33	33	125	125	125
	33	33	33	125	125	125
	33	33	33	124	124	124
	33	33	33	124	124	124
	33	33	33	124	124	124
	33	33	33	124	124	124
	33	33	33	124	124	124
	33	33	33	124	124	124
	33	33	33	124	124	124
	33	33	33	124	124	124
	33	33	33	124	124	124
	33	33	33	124	124	124
	33	33	33	124	124	124
	33	33	33	124	124	124
	33	33	33	124	124	124
	33	33	33	124	124	124
	33	33	33	124	124	124
	33	33	33	124	124	124
	33	33	33	123	123	123
	33	33	33	123	123	123
	33	33	33	123	123	123
	33	33	33	123	123	123
	33	33	33	123	123	123
	33	33	33	123	123	123
	33	33	33	123	123	123
	33	33	33	123	123	123
	33	33	33	123	123	123
	33	33	33	123	123	123
	33	33	33	123	123	123
	33	33	33	123	123	123
	33	33	33	123	123	123
	33	33	33	123	123	123
	33	33	33	123	123	123
	33	33	33	123	123	123
	33	33	33	123	123	123
	33	33	33	122	122	122
	33	33	33	122	122	122
	33	33	33	122	122	122
	33	33	33	122	122	122
	33	33	33	122	122	122
	33	33	33	122	122	122
	33	33	33	122	122	122
	33	33	33	122	122	122
	33	33	33	122	122	122
	33	33	33	122	122	122
	33	33	33	122	122	122
	33	33	33	122	122	122
	32	32	32	122	122	122
	32	32	32	122	122	122
	32	32	32	122	122	122
	32	32	32	122	122	122
	32	32	32	122	122	122
	32	32	32	122	122	122
	32	32	32	122	122	122
	32	32	32	122	122	122
	32	32	32	121	121	121
	32	32	32	121	121	121
	32	32	32	121	121	121
	32	32	32	121	121	121
	32	32	32	121	121	121
	32	32	32	121	121	121
	32	32	32	121	121	121
	32	32	32	121	121	121
	32	32	32	121	121	121
	32	32	32	121	121	121
	32	32	32	121	121	121
	32	32	32	121	121	121
	32	32	32	121	121	121
	32	32	32	121	121	121
	32	32	32	121	121	121
	32	32	32	121	121	121
	32	32	32	121	121	121
	32	32	32	121	121	121
	32	32	32	121	121	121
	32	32	32	120	120	120
	32	32	32	120	120	120
	32	32	32	120	120	120
	32	32	32	120	120	120
	32	32	32	120	120	120
	32	32	32	120	120	120
	32	32	32	120	120	120
	32	32	32	120	120	120
	32	32	32	120	120	120
	32	32	32	120	120	120
	32	32	32	120	120	120
	32	32	32	120	120	120
	32	32	32	120	120	120
	32	32	32	120	120	120
	32	32	32	120	120	120
	32	32	32	120	120	120
	32	32	32	119	119	119
	32	32	32	119	119	119
	32	32	32	119	119	119
	32	32	32	119	119	119
	32	32	32	119	119	119
	32	32	32	119	119	119
	32	32	32	119	119	119
	32	32	32	119	119	119
	32	32	32	119	119	119
	32	32	32	119	119	119
	32	32	32	119	119	119
	32	32	32	119	119	119
	32	32	32	119	119	119
	32	32	32	119	119	119
	32	32	32	119	119	119
	32	32	32	119	119	119
	32	32	32	119	119	119
	32	32	32	119	119	119
	32	32	32	119	119	119
	31	31	31	119	119	119
	31	31	31	119	119	119
	31	31	31	119	119	119
	31	31	31	118	118	118
	31	31	31	118	118	118
	31	31	31	118	118	118
	31	31	31	118	118	118
	31	31	31	118	118	118
	31	31	31	118	118	118
	31	31	31	118	118	118
	31	31	31	118	118	118
	31	31	31	118	118	118
	31	31	31	118	118	118
	31	31	31	118	118	118
	31	31	31	118	118	118
	31	31	31	118	118	118
	31	31	31	118	118	118
	31	31	31	118	118	118
	31	31	31	118	118	118
	31	31	31	118	118	118
	31	31	31	118	118	118
	31	31	31	118	118	118
	31	31	31	118	118	118
	31	31	31	118	118	118
	31	31	31	118	118	118
	31	31	31	117	117	117
	31	31	31	117	117	117
	31	31	31	117	117	117
	31	31	31	117	117	117
	31	31	31	117	117	117
	31	31	31	117	117	117
	31	31	31	117	117	117
	31	31	31	117	117	117
	31	31	31	117	117	117
	31	31	31	117	117	117
	31	31	31	117	117	117
	31	31	31	117	117	117
	31	31	31	117	117	117
	31	31	31	117	117	117
	31	31	31	117	117	117
	31	31	31	117	117	117
	31	31	31	117	117	117
	31	31	31	117	117	117
	31	31	31	116	116	116
	31	31	31	116	116	116
	31	31	31	116	116	116
	31	31	31	116	116	116
	31	31	31	116	116	116
	31	31	31	116	116	116
	31	31	31	116	116	116
	31	31	31	116	116	116
	31	31	31	116	116	116
	31	31	31	116	116	116
	31	31	31	116	116	116
	31	31	31	116	116	116
	31	31	31	116	116	116
	31	31	31	116	116	116
	31	31	31	116	116	116
	31	31	31	116	116	116
	31	31	31	116	116	116
	31	31	31	116	116	116
	31	31	31	116	116	116
	31	31	31	116	116	116
	31	31	31	116	116	116
	31	31	31	116	116	116
	31	31	31	116	116	116
	31	31	31	115	115	115
	31	31	31	115	115	115
	31	31	31	115	115	115
	31	31	31	115	115	115
	30	30	30	115	115	115
	30	30	30	115	115	115
	30	30	30	115	115	115
	30	30	30	115	115	115
	30	30	30	115	115	115
	30	30	30	115	115	115
	30	30	30	115	115	115
	30	30	30	115	115	115
	30	30	30	115	115	115
	30	30	30	115	115	115
	30	30	30	115	115	115
	30	30	30	115	115	115
	30	30	30	115	115	115
	30	30	30	115	115	115
	30	30	30	115	115	115
	30	30	30	115	115	115
	30	30	30	115	115	115
	30	30	30	115	115	115
	30	30	30	115	115	115
	30	30	30	114	114	114
	30	30	30	114	114	114
	30	30	30	114	114	114
	30	30	30	114	114	114
	30	30	30	114	114	114
	30	30	30	114	114	114
	30	30	30	114	114	114
	30	30	30	114	114	114
	30	30	30	114	114	114
	30	30	30	114	114	114
	30	30	30	114	114	114
	30	30	30	114	114	114
	30	30	30	114	114	114
	30	30	30	114	114	114
	30	30	30	114	114	114
	30	30	30	114	114	114
	30	30	30	114	114	114
	30	30	30	114	114	114
	30	30	30	113	113	113
	30	30	30	113	113	113
	30	30	30	113	113	113
	30	30	30	113	113	113
	30	30	30	113	113	113
	30	30	30	113	113	113
	30	30	30	113	113	113
	30	30	30	113	113	113
	30	30	30	113	113	113
	30	30	30	113	113	113
	30	30	30	113	113	113
	30	30	30	113	113	113
	30	30	30	113	113	113
	30	30	30	113	113	113
	30	30	30	113	113	113
	30	30	30	113	113	113
	30	30	30	113	113	113
	30	30	30	113	113	113
	30	30	30	113	113	113
	30	30	30	113	113	113
	30	30	30	113	113	113
	30	30	30	112	112	112
	30	30	30	112	112	112
	30	30	30	112	112	112
	30	30	30	112	112	112
	30	30	30	112	112	112
	30	30	30	112	112	112
	30	30	30	112	112	112
	30	30	30	112	112	112
	30	30	30	112	112	112
	30	30	30	112	112	112
	30	30	30	112	112	112
	30	30	30	112	112	112
	30	30	30	112	112	112
	30	30	30	112	112	112
	30	30	30	112	112	112
	30	30	30	112	112	112
	30	30	30	112	112	112
	30	30	30	112	112	112
	30	30	30	112	112	112
	30	30	30	112	112	112
	30	30	30	112	112	112
	30	30	30	112	112	112
	30	30	30	112	112	112
	30	30	30	112	112	112
	30	30	30	111	111	111
	30	30	30	111	111	111
	30	30	30	111	111	111
	30	30	30	111	111	111
	30	30	30	111	111	111
	30	30	30	111	111	111
	30	30	30	111	111	111
	29	29	29	111	111	111
	29	29	29	111	111	111
	29	29	29	111	111	111
	29	29	29	111	111	111
	29	29	29	111	111	111
	29	29	29	111	111	111
	29	29	29	111	111	111
	29	29	29	111	111	111
	29	29	29	111	111	111
	29	29	29	111	111	111
	29	29	29	111	111	111
	29	29	29	111	111	111
	29	29	29	111	111	111
	29	29	29	111	111	111
	29	29	29	111	111	111
	29	29	29	111	111	111
	29	29	29	111	111	111
	29	29	29	110	110	110
	29	29	29	110	110	110
	29	29	29	110	110	110
	29	29	29	110	110	110
	29	29	29	110	110	110
		29	29		110	110
		29	29		110	110
		29	29		110	110
		29	29		110	110
		29	29		110	110
		29	29		110	110
		29	29		110	110
		29	29		110	110
		29	29		110	110
		29	29		110	110
		29	29		110	110
		29	29		110	110
		29	29		110	110
		29	29		110	110
		29	29		110	110
		29	29		110	110
		29	29		110	110
		29	29		110	110
		29	29		110	110
		29	29		110	110
		29	29		110	110
		29	29		110	110
		29	29		110	110
		29	29		110	110
		29	29		109	109
		29	29		109	109
		29	29		109	109
		29	29		109	109
		29	29		109	109
		29	29		109	109
		29	29		109	109
		29	29		109	109
		29	29		109	109
		29	29		109	109
		29	29		109	109
		29	29		109	109
		29	29		109	109
		29	29		109	109
		29	29		109	109
		29	29		109	109
		29	29		109	109
		29	29		109	109
		29	29		109	109
		29	29		109	109
		29	29		109	109
		29	29		109	109
		29	29		109	109
		29	29		109	109
		29	29		109	109
		29	29		109	109
		29	29		109	109
		29	29		109	109
		29	29		109	109
		29	29		109	109
		29	29		109	109
		29	29		109	109
		29	29		109	109
		29	29		109	109
		29	29		109	109
		29	29		109	109
		29	29		109	109
		29	29		109	109
		29	29		109	109
		29	29		109	109
		29	29		109	109
		29	29		109	109
		29	29		109	109
		29	29		108	108
		29	29		108	108
		29	29		108	108
		29	29		108	108
		29	29		108	108
		29	29		108	108
		29	29		108	108
		29	29		108	108
		29	29		108	108
		29	29		108	108
		29	29		108	108
		29	29		108	108
		29	29		108	108
		29	29		108	108
		29	29		108	108
		29	29		108	108
		29	29		108	108
		29	29		108	108
		29	29		108	108
		29	29		108	108
		29	29		108	108
		28	28		108	108
		28	28		108	108
		28	28		108	108
		28	28		108	108
		28	28		107	107
		28	28		107	107
		28	28		107	107
		28	28		107	107
		28	28		107	107
		28	28		107	107
		28	28		107	107
		28	28		107	107
		28	28		107	107
		28	28		107	107
		28	28		107	107
		28	28		107	107
		28	28		107	107
		28	28		107	107
		28	28		107	107
		28	28		107	107
		28	28		107	107
		28	28		107	107
		28	28		107	107
		28	28		107	107
		28	28		107	107
		28	28		107	107
		28	28		107	107
		28	28		107	107
		28	28		107	107
		28	28		107	107
		28	28		107	107
		28	28		107	107
		28	28		106	106
		28	28		106	106
		28	28		106	106
		28	28		106	106
		28	28		106	106
		28	28		106	106
		28	28		106	106
		28	28		106	106
		28	28		106	106
		28	28		106	106
		28	28		106	106
		28	28		106	106
		28	28		106	106
		28	28		106	106
		28	28		106	106
		28	28		106	106
		28	28		106	106
		28	28		106	106
		28	28		106	106
		28	28		106	106
		28	28		106	106
		28	28		106	106
		28	28		106	106
		28	28		106	106
		28	28		106	106
		28	28		106	106
		28	28		106	106
		28	28		106	106
		28	28		106	106
		28	28		106	106
		28	28		106	106
		28	28		106	106
		28	28		106	106
		28	28		106	106
		28	28		106	106
		28	28		106	106
		28	28		106	106
		28	28		106	106
		28	28		105	105
		28	28		105	105
		28	28		105	105
		28	28		105	105
		28	28		105	105
		28	28		105	105
		28	28		105	105
		28	28		105	105
		28	28		105	105
		28	28		105	105
		28	28		105	105
		28	28		105	105
		28	28		105	105
		28	28		105	105
		28	28		105	105
		28	28		105	105
		28	28		105	105
		28	28		105	105
		28	28		105	105
		28	28		105	105
		28	28		105	105
		28	28		105	105
		28	28		105	105
		28	28		104	104
		28	28		104	104
		28	28		104	104
		28	28		104	104
		28	28		104	104
		28	28		104	104
		28	28		104	104
		28	28		104	104
		28	28		104	104
		28	28		104	104
		28	28		104	104
		28	28		104	104
		28	28		104	104
		28	28		104	104
		28	28		104	104
		28	28		104	104
		28	28		104	104
		28	28		104	104
		28	28		104	104
		28	28		104	104
		28	28		104	104
		28	28		104	104
		28	28		104	104
		28	28		104	104
		28	28		104	104
		28	28		104	104
		28	28		104	104
		28	28		104	104
		28	28		104	104
		28	28		104	104
		28	28		104	104
		27	27		104	104
		27	27		104	104
		27	27		104	104
		27	27		104	104
		27	27		104	104
		27	27		104	104
		27	27		104	104
		27	27		104	104
		27	27		104	104
		27	27		104	104
		27	27		104	104
		27	27		104	104
		27	27		104	104
		27	27		103	103
		27	27		103	103
		27	27		103	103
		27	27		103	103
		27	27		103	103
		27	27		103	103
		27	27		103	103
		27	27		103	103
		27	27		103	103
		27	27		103	103
		27	27		103	103
		27	27		103	103
		27	27		103	103
		27	27		103	103
		27	27		103	103
		27	27		103	103
		27	27		103	103
		27	27		103	103
		27	27		103	103
		27	27		103	103
		27	27		103	103
		27	27		103	103
		27	27		103	103
		27	27		103	103
		27	27		103	103
		27	27		103	103
		27	27		103	103
		27	27		103	103
		27	27		103	103
		27	27		103	103
		27	27		103	103
		27	27		103	103
		27	27		103	103
		27	27		102	102
		27	27		102	102
		27	27		102	102
		27	27		102	102
		27	27		102	102
		27	27		102	102
		27	27		102	102
		27	27		102	102
		27	27		102	102
		27	27		102	102
		27	27		102	102
		27	27		102	102
		27	27		102	102
		27	27		102	102
		27	27		102	102
		27	27		102	102
		27	27		102	102
		27	27		102	102
		27	27		102	102
		27	27		102	102
		27	27		102	102
		27	27		102	102
		27	27		102	102
		27	27		102	102
		27	27		102	102
		27	27		102	102
		27	27		102	102
		27	27		102	102
		27	27		102	102
		27	27		102	102
		27	27		102	102
		27	27		102	102
		27	27		102	102
		27	27		101	101
		27	27		101	101
		27	27		101	101
		27	27		101	101
		27	27		101	101
		27	27		101	101
		27	27		101	101
		27	27		101	101
		27	27		101	101
		27	27		101	101
		27	27		101	101
		27	27		101	101
		27	27		101	101
		27	27		101	101
		27	27		101	101
		27	27		101	101
		27	27		101	101
		27	27		101	101
		27	27		101	101
		27	27		101	101
		27	27		101	101
		27	27		101	101
		27	27		101	101
		27	27		101	101
		27	27		100	100
		27	27		100	100
		27	27		100	100
		27	27		100	100
		27	27		100	100
		27	27		100	100
		27	27		100	100
		27	27		100	100
		27	27		100	100
		27	27		100	100
		27	27		100	100
		27	27		100	100
		27	27		100	100
		27	27		100	100
		27	27		100	100
		27	27		100	100
		27	27		100	100
		27	27		100	100
		27	27		100	100
		27	27		100	100
		27	27		100	100
		26	26		100	100
		26	26		100	100
		26	26		100	100
		26	26		99	99
		26	26		99	99
		26	26		99	99
		26	26		99	99
		26	26		99	99
		26	26		99	99
		26	26		99	99
		26	26		99	99
		26	26		99	99
		26	26		99	99
		26	26		99	99
		26	26		99	99
		26	26		99	99
		26	26		99	99
		26	26		99	99
		26	26		99	99
		26	26		99	99
		26	26		99	99
		26	26		99	99
		26	26		99	99
		26	26		99	99
		26	26		99	99
		26	26		99	99
		26	26		99	99
		26	26		99	99
		26	26		99	99
		26	26		99	99
		26	26		99	99
		26	26		99	99
		26	26		99	99
		26	26		99	99
		26	26		99	99
		26	26		99	99
		26	26		99	99
		26	26		99	99
		26	26		99	99
		26	26		99	99
		26	26		99	99
		26	26		99	99
		26	26		99	99
		26	26		99	99
		26	26		99	99
		26	26		99	99
		26	26		99	99
		26	26		98	98
		26	26		98	98
		26	26		98	98
		26	26		98	98
		26	26		98	98
		26	26		98	98
		26	26		98	98
		26	26		98	98
		26	26		98	98
		26	26		98	98
		26	26		98	98
		26	26		98	98
		26	26		98	98
		26	26		98	98
		26	26		98	98
		26	26		98	98
		26	26		98	98
		26	26		98	98
		26	26		98	98
		26	26		98	98
		26	26		98	98
		26	26		98	98
		26	26		98	98
		26	26		98	98
		26	26		98	98
		26	26		98	98
		26	26		98	98
		26	26		98	98
		26	26		98	98
		26	26		98	98
		26	26		98	98
		26	26		98	98
		26	26		98	98
		26	26		98	98
		26	26		98	98
		26	26		97	97
		26	26		97	97
		26	26		97	97
		26	26		97	97
		26	26		97	97
		26	26		97	97
		26	26		97	97
		26	26		97	97
		26	26		97	97
		26	26		97	97
		26	26		97	97
		26	26		97	97
		26	26		97	97
		26	26		97	97
		26	26		97	97
		26	26		97	97
		26	26		97	97
		26	26		97	97
		26	26		97	97
		26	26		97	97
		26	26		97	97
		26	26		97	97
		26	26		97	97
		26	26		97	97
		26	26		97	97
		26	26		97	97
		26	26		97	97
		26	26		97	97
		26	26		97	97
		26	26		97	97
		26	26		97	97
		26	26		97	97
		26	26		97	97
		26	26		97	97
		26	26		97	97
		26	26		97	97
		26	26		97	97
		26	26		97	97
		26	26		97	97
		26	26		97	97
		26	26		97	97
		26	26		97	97
		25	25		97	97
		25	25		97	97
		25	25		97	97
		25	25		97	97
		25	25		97	97
		25	25		97	97
		25	25		97	97
		25	25		97	97
		25	25		97	97
		25	25		97	97
		25	25		97	97
		25	25		97	97
		25	25		96	96
		25	25		96	96
		25	25		96	96
		25	25		96	96
		25	25		96	96
		25	25		96	96
		25	25		96	96
		25	25		96	96
		25	25		96	96
		25	25		96	96
		25	25		96	96
		25	25		96	96
		25	25		96	96
		25	25		96	96
		25	25		96	96
		25	25		96	96
		25	25		96	96
		25	25		96	96
		25	25		96	96
		25	25		96	96
		25	25		96	96
		25	25		96	96
		25	25		96	96
		25	25		96	96
		25	25		96	96
		25	25		96	96
		25	25		96	96
		25	25		96	96
		25	25		96	96
		25	25		96	96
		25	25		96	96
		25	25		96	96
		25	25		96	96
		25	25		96	96
		25	25		96	96
		25	25		96	96
		25	25		96	96
		25	25		96	96
		25	25		96	96
		25	25		96	96
		25	25		96	96
		25	25		96	96
		25	25		96	96
		25	25		96	96
		25	25		95	95
		25	25		95	95
		25	25		95	95
		25	25		95	95
		25	25		95	95
		25	25		95	95
		25	25		95	95
		25	25		95	95
		25	25		95	95
		25	25		95	95
		25	25		95	95
		25	25		95	95
		25	25		95	95
		25	25		95	95
		25	25		95	95
		25	25		95	95
		25	25		95	95
		25	25		95	95
		25	25		95	95
		25	25		95	95
		25	25		95	95
		25	25		95	95
		25	25		95	95
		25	25		95	95
		25	25		95	95
		25	25		95	95
		25	25		95	95
		25	25		95	95
		25	25		95	95
		25	25		95	95
		25	25		95	95
		25	25		95	95
		25	25		95	95
		25	25		95	95
		25	25		95	95
		25	25		95	95
		25	25		95	95
		25	25		95	95
		25	25		95	95
		25	25		95	95
		25	25		95	95
		25	25		95	95
		25	25		95	95
		25	25		95	95
		25	25		95	95
		25	25		95	95
		25	25		95	95
		25	25		95	95
		25	25		95	95
		25	25		95	95
		25	25		95	95
		25	25		95	95
		25	25		95	95
		25	25		94	94
		25	25		94	94
		25	25		94	94
		25	25		94	94
		25	25		94	94
		25	25		94	94
		25	25		94	94
		25	25		94	94
		25	25		94	94
		25	25		94	94
		25	25		94	94
		25	25		94	94
		25	25		94	94
		25	25		94	94
		25	25		94	94
		25	25		94	94
		25	25		94	94
		25	25		94	94
		25	25		94	94
		25	25		94	94
		25	25		94	94
		25	25		94	94
		25	25		94	94
		25	25		94	94
		25	25		94	94
		25	25		94	94
		25	25		94	94
		25	25		94	94
		25	25		94	94
		25	25		94	94
		25	25		94	94
		25	25		94	94
		25	25		94	94
		25	25		94	94
		25	25		94	94
		25	25		94	94
		25	25		93	93
		25	25		93	93
		25	25		93	93
		25	25		93	93
		25	25		93	93
		25	25		93	93
		24	24		93	93
		24	24		93	93
		24	24		93	93
		24	24		93	93
		24	24		93	93
		24	24		93	93
		24	24		93	93
		24	24		93	93
		24	24		93	93
		24	24		93	93
		24	24		93	93
		24	24		93	93
		24	24		93	93
		24	24		93	93
		24	24		93	93
		24	24		93	93
		24	24		93	93
		24	24		93	93
		24	24		93	93
		24	24		93	93
		24	24		93	93
		24	24		93	93
		24	24		93	93
		24	24		93	93
		24	24		93	93
		24	24		93	93
		24	24		93	93
		24	24		93	93
		24	24		93	93
		24	24		93	93
		24	24		93	93
		24	24		93	93
		24	24		93	93
		24	24		93	93
		24	24		93	93
		24	24		93	93
		24	24		93	93
		24	24		93	93
		24	24		93	93
		24	24		93	93
		24	24		93	93
		24	24		93	93
		24	24		93	93
		24	24		93	93
		24	24		93	93
		24	24		93	93
		24	24		93	93
		24	24		93	93
		24	24		93	93
		24	24		92	92
		24	24		92	92
		24	24		92	92
		24	24		92	92
		24	24		92	92
		24	24		92	92
		24	24		92	92
		24	24		92	92
		24	24		92	92
		24	24		92	92
		24	24		92	92
		24	24		92	92
		24	24		92	92
		24	24		92	92
		24	24		92	92
		24	24		92	92
		24	24		92	92
		24	24		92	92
		24	24		92	92
		24	24		92	92
		24	24		92	92
		24	24		92	92
		24	24		92	92
		24	24		92	92
		24	24		92	92
		24	24		92	92
		24	24		92	92
		24	24		92	92
		24	24		92	92
		24	24		92	92
		24	24		92	92
		24	24		92	92
		24	24		92	92
		24	24		92	92
		24	24		92	92
		24	24		92	92
		24	24		92	92
		24	24		92	92
		24	24		92	92
		24	24		92	92
		24	24		92	92
		24	24		92	92
		24	24		92	92
		24	24		92	92
		24	24		92	92
		24	24		91	91
		24	24		91	91
		24	24		91	91
		24	24		91	91
		24	24		91	91
		24	24		91	91
		24	24		91	91
		24	24		91	91
		24	24		91	91
		24	24		91	91
		24	24		91	91
		24	24		91	91
		24	24		91	91
		24	24		91	91
		24	24		91	91
		24	24		91	91
		24	24		91	91
		24	24		91	91
		24	24		91	91
		24	24		91	91
		24	24		91	91
		24	24		91	91
		24	24		91	91
		24	24		91	91
		24	24		91	91
		24	24		91	91
		24	24		91	91
		24	24		91	91
		24	24		91	91
		24	24		91	91
		24	24		91	91
		24	24		91	91
		24	24		91	91
		24	24		91	91
		24	24		91	91
		24	24		91	91
		24	24		91	91
		24	24		91	91
		24	24		91	91
		24	24		91	91
		24	24		91	91
		24	24		91	91
		24	24		91	91
		24	24		90	90
		24	24		90	90
		24	24		90	90
		24	24		90	90
		24	24		90	90
		24	24		90	90
		24	24		90	90
		24	24		90	90
		24	24		90	90
		24	24		90	90
		24	24		90	90
		24	24		90	90
		24	24		90	90
		24	24		90	90
		24	24		90	90
		24	24		90	90
		24	24		90	90
		24	24		90	90
		24	24		90	90
		24	24		90	90
		24	24		90	90
		24	24		90	90
		24	24		90	90
		24	24		90	90
		24	24		90	90
		24	24		90	90
		24	24		90	90
		24	24		90	90
		24	24		90	90
		24	24		90	90
		24	24		90	90
		24	24		90	90
		24	24		90	90
		24	24		90	90
		24	24		90	90
		24	24		90	90
		24	24		90	90
		24	24		89	89
		24	24		89	89
		24	24		89	89
		24	24		89	89
		24	24		89	89
		24	24		89	89
		24	24		89	89
		24	24		89	89
		24	24		89	89
		24	24		89	89
		24	24		89	89
		24	24		89	89
		24	24		89	89
		23	23		89	89
		23	23		89	89
		23	23		89	89
		23	23		89	89
		23	23		89	89
		23	23		89	89
		23	23		89	89
		23	23		89	89
		23	23		89	89
		23	23		89	89
		23	23		89	89
		23	23		89	89
		23	23		89	89
		23	23		89	89
		23	23		89	89
		23	23		89	89
		23	23		89	89
		23	23		89	89
		23	23		89	89
		23	23		89	89
		23	23		89	89
		23	23		89	89
		23	23		89	89
		23	23		89	89
		23	23		89	89
		23	23		89	89
		23	23		89	89
		23	23		89	89
		23	23		89	89
		23	23		89	89
		23	23		89	89
		23	23		89	89
		23	23		89	89
		23	23		89	89
		23	23		89	89
		23	23		89	89
		23	23		89	89
		23	23		88	88
		23	23		88	88
		23	23		88	88
		23	23		88	88
		23	23		88	88
		23	23		88	88
		23	23		88	88
		23	23		88	88
		23	23		88	88
		23	23		88	88
		23	23		88	88
		23	23		88	88
		23	23		88	88
		23	23		88	88
		23	23		88	88
		23	23		88	88
		23	23		88	88
		23	23		88	88
		23	23		88	88
		23	23		88	88
		23	23		88	88
		23	23		88	88
		23	23		88	88
		23	23		88	88
		23	23		88	88
		23	23		88	88
		23	23		88	88
		23	23		88	88
		23	23		88	88
		23	23		88	88
		23	23		88	88
		23	23		88	88
		23	23		88	88
		23	23		88	88
		23	23		88	88
		23	23		88	88
		23	23		88	88
		23	23		88	88
		23	23		88	88
		23	23		88	88
		23	23		88	88
		23	23		88	88
		23	23		88	88
		23	23		88	88
		23	23		88	88
		23	23		88	88
		23	23		88	88
		23	23		88	88
		23	23		88	88
		23	23		88	88
		23	23		88	88
		23	23		88	88
		23	23		88	88
		23	23		88	88
		23	23		88	88
		23	23		88	88
		23	23		88	88
		23	23		88	88
		23	23		88	88
		23	23		88	88
		23	23		88	88
		23	23		88	88
		23	23		88	88
		23	23		88	88
		23	23		88	88
		23	23		88	88
		23	23		88	88
		23	23		88	88
		23	23		88	88
		23	23		87	87
		23	23		87	87
		23	23		87	87
		23	23		87	87
		23	23		87	87
		23	23		87	87
		23	23		87	87
		23	23		87	87
		23	23		87	87
		23	23		87	87
		23	23		87	87
		23	23		87	87
		23	23		87	87
		23	23		87	87
		23	23		87	87
		23	23		87	87
		23	23		87	87
		23	23		87	87
		23	23		87	87
		23	23		87	87
		23	23		87	87
		23	23		87	87
		23	23		87	87
		23	23		87	87
		23	23		87	87
		23	23		87	87
		23	23		87	87
		23	23		87	87
		23	23		87	87
		23	23		87	87
		23	23		87	87
		23	23		87	87
		23	23		87	87
		23	23		87	87
		23	23		87	87
		23	23		87	87
		23	23		87	87
		23	23		87	87
		23	23		87	87
		23	23		87	87
		23	23		87	87
		23	23		87	87
		23	23		87	87
		23	23		87	87
		23	23		87	87
		23	23		87	87
		23	23		87	87
		23	23		87	87
		23	23		87	87
		23	23		87	87
		23	23		87	87
		23	23		87	87
		23	23		87	87
		23	23		87	87
		23	23		87	87
		23	23		87	87
		23	23		87	87
		23	23		87	87
		23	23		87	87
		23	23		87	87
		23	23		87	87
		23	23		87	87
		23	23		87	87
		23	23		87	87
		23	23		87	87
		23	23		87	87
		23	23		87	87
		23	23		87	87
		23	23		87	87
		23	23		86	86
		23	23		86	86
		23	23		86	86
		23	23		86	86
		23	23		86	86
		23	23		86	86
		23	23		86	86
		23	23		86	86
		23	23		86	86
		23	23		86	86
		23	23		86	86
		23	23		86	86
		23	23		86	86
		23	23		86	86
		23	23		86	86
		23	23		86	86
		23	23		86	86
		23	23		86	86
		23	23		86	86
		23	23		86	86
		23	23		86	86
		23	23		86	86
		23	23		86	86
		23	23		86	86
		23	23		86	86
[truncated: 8,002 more rows]

## Sheet: Figure 1D
Correlation analysis between libraries	scRNA vs scRNA-seqΔΔ					Fig 1D. Pearson correlation coefficient
	0615-1 no Δ		0427-3 ΔΔ			sample estimates: cor=0.93
	ID	UMI	ID	UMI		p-value < 2.2e-16
	b0001	1	b0001	21
	b0002	86	b0002	1034
	b0003	18	b0003	327
	b0004	42	b0004	631
	b0005	2	b0005	79
	b0006	200	b0006	731
	b0007	15	b0007	208
	b0008	512	b0008	7759
	b0009	16	b0009	168
	b0010	2	b0010	66
	b0011	3	b0011	66
	b0013	1	b0013	26
	b0014	987	b0014	13067
	b0015	81	b0015	786
	b0016	16	b0016	190
	b0019	27	b0019	458
	b0020	3	b0020	148
	b0021	2	b0021	17
	b0022	2	b0022	6
	b0023	9	b0023	184
	b0024	1	b0024	17
	b0025	34	b0025	657
	b0026	345	b0026	4657
	b0027	9	b0027	258
	b0028	21	b0028	239
	b0029	24	b0029	337
	b0030	151	b0030	2753
	b0031	34	b0031	437
	b0032	8	b0032	121
	b0033	23	b0033	1537
	b0034	12	b0034	163
	b0035	5	b0035	29
	b0036	5	b0036	71
	b0037	3	b0037	132
	b0038	7	b0038	194
	b0039	7	b0039	148
	b0040	4	b0040	127
	b0042	5	b0042	91
	b0043	5	b0043	89
	b0045	1	b0045	83
	b0046	6	b0046	96
	b0047	19	b0047	346
	b0048	3	b0048	54
	b0049	14	b0049	339
	b0050	12	b0050	260
	b0051	36	b0051	396
	b0052	23	b0052	292
	b0053	104	b0053	1328
	b0054	145	b0054	2341
	b0055	7	b0055	121
	b0059	22	b0059	554
	b0060	16	b0060	327
	b0061	1	b0061	71
	b0062	13	b0062	303
	b0063	7	b0063	244
	b0064	18	b0064	272
	b0065	17	b0065	98
	b0066	2	b0066	113
	b0067	4	b0067	155
	b0068	11	b0068	116
	b0069	19	b0069	277
	b0070	6	b0070	200
	b0071	6	b0071	184
	b0072	7	b0072	174
	b0073	3	b0073	68
	b0074	5	b0074	115
	b0076	3	b0076	83
	b0077	8	b0077	293
	b0078	4	b0078	42
	b0080	43	b0080	759
	b0081	19	b0081	259
	b0082	15	b0082	235
	b0083	10	b0083	142
	b0084	24	b0084	476
	b0085	42	b0085	609
	b0086	72	b0086	1111
	b0087	65	b0087	853
	b0088	49	b0088	824
	b0089	27	b0089	363
	b0090	50	b0090	591
	b0091	62	b0091	828
	b0092	55	b0092	705
	b0093	41	b0093	512
	b0094	89	b0094	1613
	b0095	445	b0095	6132
	b0096	195	b0096	3469
	b0097	15	b0097	268
	b0098	329	b0098	4913
	b0099	4	b0099	46
	b0101	1	b0101	25
	b0102	7	b0102	145
	b0103	10	b0103	209
	b0104	71	b0104	879
	b0106	2	b0106	112
	b0107	3	b0107	87
	b0108	2	b0108	31
	b0109	8	b0109	151
	b0110	42	b0110	859
	b0111	28	b0111	422
	b0112	8	b0112	193
	b0113	13	b0113	277
	b0114	1155	b0114	16488
	b0115	531	b0115	7436
	b0116	648	b0116	9361
	b0117	2	b0117	91
	b0118	1243	b0118	17412
	b0119	30	b0119	514
	b0120	13	b0120	355
	b0121	35	b0121	589
	b0122	4	b0122	15
	b0123	11	b0123	232
	b0124	16	b0124	354
	b0125	53	b0125	519
	b0126	23	b0126	434
	b0127	31	b0127	538
	b0128	16	b0128	238
	b0129	38	b0129	622
	b0130	8	b0130	127
	b0131	33	b0131	202
	b0132	4	b0132	105
	b0133	51	b0133	726
	b0134	44	b0134	643
	b0135	2	b0135	90
	b0136	1	b0136	57
	b0137	3	b0137	43
	b0138	2	b0138	36
	b0139	2	b0139	238
	b0140	1	b0140	78
	b0143	51	b0143	442
	b0144	5	b0144	87
	b0145	63	b0145	1051
	b0146	62	b0146	1261
	b0147	4	b0147	60
	b0148	23	b0148	394
	b0149	73	b0149	692
	b0150	8	b0150	204
	b0152	2	b0152	46
	b0153	5	b0153	117
	b0154	71	b0154	950
	b0155	13	b0155	410
	b0156	23	b0156	139
	b0157	2	b0157	72
	b0158	12	b0158	116
	b0159	62	b0159	965
	b0160	10	b0160	211
	b0161	63	b0161	1044
	b0162	41	b0162	595
	b0163	16	b0163	266
	b0164	3	b0164	103
	b0166	160	b0166	1696
	b0167	32	b0167	519
	b0168	44	b0168	537
	b0169	352	b0169	5770
	b0170	250	b0170	3942
	b0171	53	b0171	658
	b0172	84	b0172	1470
	b0173	16	b0173	222
	b0174	18	b0174	296
	b0175	36	b0175	572
	b0176	71	b0176	750
	b0177	320	b0177	3711
	b0178	118	b0178	1511
	b0179	83	b0179	1343
	b0180	22	b0180	526
	b0181	30	b0181	500
	b0182	12	b0182	300
	b0183	17	b0183	146
	b0184	68	b0184	720
	b0185	100	b0185	1366
	b0186	44	b0186	1079
	b0187	7	b0187	65
	b0188	8	b0188	232
	b0189	8	b0189	178
	b0190	26	b0190	284
	b0191	21	b0191	153
	b0192	20	b0192	313
	b0193	3	b0193	62
	b0194	101	b0194	1392
	b0195	5	b0195	195
	b0196	18	b0196	328
	b0197	34	b0197	524
	b0198	6	b0198	155
	b0199	8	b0199	136
	b0200	22	b0200	271
	b0207	11	b0207	108
	b0208	8	b0208	151
	b0209	17	b0209	353
	b0210	7	b0210	262
	b0211	24	b0211	406
	b0212	20	b0212	376
	b0213	10	b0213	126
	b0214	5	b0214	118
	b0215	7	b0215	299
	b0217	2	b0217	111
	b0219	15	b0219	157
	b0220	42	b0220	519
	b0221	12	b0221	223
	b0222	56	b0222	874
	b0223	11	b0223	175
	b0224	1	b0224	122
	b0225	1	b0225	23
	b0226	15	b0226	235
	b0227	1	b0227	42
	b0228	2	b0228	79
	b0231	7	b0231	160
	b0232	3	b0232	29
	b0237	449	b0237	6903
	b0238	7	b0238	99
	b0239	25	b0239	417
	b0241	1	b0241	205
	b0242	37	b0242	349
	b0243	55	b0243	903
	b0245	1	b0245	49
	b0246	1	b0246	52
	b0247	1	b0247	17
	b0248	5	b0248	120
	b0250	1	b0250	53
	b0251	5	b0251	67
	b0252	7	b0252	151
	b0253	5	b0253	24
	b0254	1	b0254	84
	b0256	21	b0256	167
	b0260	5	b0260	76
	b0261	13	b0261	216
	b0264	2	b0264	21
	b0265	1	b0265	12
	b0267	1	b0267	110
	b0268	9	b0268	146
	b0269	11	b0269	233
	b0270	9	b0270	174
	b0271	9	b0271	194
	b0272	3	b0272	109
	b0273	7	b0273	197
	b0274	4	b0274	26
	b0275	1	b0275	7
	b0277	1	b0277	40
	b0278	1	b0278	73
	b0280	6	b0280	39
	b0281	13	b0281	369
	b0283	4	b0283	68
	b0284	7	b0284	213
	b0285	2	b0285	79
	b0286	1	b0286	48
	b0287	16	b0287	177
	b0289	1	b0289	46
	b0290	5	b0290	150
	b0291	2	b0291	207
	b0292	1	b0292	36
	b0293	2	b0293	52
	b0298	2	b0298	24
	b0299	10	b0299	93
	b0304	10	b0304	142
	b0305	1	b0305	44
	b0306	75	b0306	1241
	b0307	159	b0307	2056
	b0308	44	b0308	479
	b0311	9	b0311	156
	b0312	7	b0312	321
	b0313	3	b0313	57
	b0314	9	b0314	227
	b0315	5	b0315	94
	b0316	6	b0316	113
	b0317	1	b0317	47
	b0318	2	b0318	49
	b0319	3	b0319	45
	b0320	2	b0320	105
	b0321	3	b0321	80
	b0323	3	b0323	52
	b0324	15	b0324	220
	b0325	91	b0325	1049
	b0326	1	b0326	64
	b0327	1	b0327	18
	b0328	13	b0328	247
	b0329	56	b0329	922
	b0330	3	b0330	81
	b0331	1	b0331	58
	b0333	1	b0333	119
	b0334	3	b0334	146
	b0335	2	b0335	141
	b0336	7	b0336	117
	b0337	16	b0337	216
	b0338	7	b0338	105
	b0339	3	b0339	68
	b0341	3	b0341	67
	b0342	2	b0342	66
	b0343	6	b0343	179
	b0344	30	b0344	370
	b0345	16	b0345	307
	b0346	1	b0346	120
	b0348	1	b0348	47
	b0349	1	b0349	45
	b0350	2	b0350	64
	b0351	1	b0351	51
	b0353	3	b0353	119
	b0354	6	b0354	155
	b0355	12	b0355	119
	b0356	44	b0356	664
	b0357	34	b0357	275
	b0358	1	b0358	99
	b0360	5	b0360	60
	b0361	11	b0361	61
	b0363	2	b0363	89
	b0365	2	b0365	52
	b0366	1	b0366	51
	b0367	3	b0367	37
	b0369	39	b0369	815
	b0372	9	b0372	80
	b0373	4	b0373	18
	b0375	1	b0375	26
	b0376	7	b0376	239
	b0377	6	b0377	164
	b0378	3	b0378	149
	b0380	3	b0380	60
	b0381	50	b0381	746
	b0382	10	b0382	94
	b0383	11	b0383	157
	b0384	4	b0384	67
	b0385	4	b0385	102
	b0386	29	b0386	340
	b0387	4	b0387	104
	b0388	5	b0388	73
	b0389	4	b0389	156
	b0390	1	b0390	61
	b0391	26	b0391	243
	b0393	15	b0393	266
	b0394	51	b0394	659
	b0396	1	b0396	88
	b0397	37	b0397	670
	b0398	9	b0398	304
	b0399	4	b0399	99
	b0400	15	b0400	135
	b0401	34	b0401	574
	b0402	10	b0402	168
	b0403	21	b0403	198
	b0404	4	b0404	117
	b0405	7	b0405	193
	b0406	74	b0406	1029
	b0407	42	b0407	937
	b0408	94	b0408	1141
	b0409	65	b0409	857
	b0410	7	b0410	200
	b0411	176	b0411	2877
	b0412	1	b0412	42
	b0413	15	b0413	212
	b0414	22	b0414	518
	b0415	23	b0415	413
	b0416	20	b0416	388
	b0417	17	b0417	275
	b0418	41	b0418	427
	b0419	51	b0419	840
	b0420	43	b0420	908
	b0421	20	b0421	452
	b0422	17	b0422	229
	b0423	19	b0423	279
	b0424	11	b0424	167
	b0425	27	b0425	417
	b0426	40	b0426	791
	b0427	5	b0427	136
	b0428	10	b0428	228
	b0429	2	b0429	93
	b0430	7	b0430	133
	b0431	21	b0431	639
	b0432	13	b0432	210
	b0433	5	b0433	167
	b0434	21	b0434	201
	b0435	73	b0435	601
	b0436	362	b0436	4590
	b0437	66	b0437	1102
	b0438	103	b0438	2067
	b0439	197	b0439	2694
	b0440	230	b0440	6055
	b0441	78	b0441	1351
	b0444	22	b0444	270
	b0445	24	b0445	365
	b0446	3	b0446	98
	b0447	7	b0447	99
	b0448	5	b0448	104
	b0449	8	b0449	175
	b0451	4	b0451	88
	b0452	6	b0452	171
	b0453	14	b0453	292
	b0454	3	b0454	43
	b0457	2	b0457	143
	b0458	11	b0458	117
	b0459	3	b0459	77
	b0460	7	b0460	148
	b0461	14	b0461	196
	b0462	244	b0462	3927
	b0463	60	b0463	1116
	b0464	3	b0464	284
	b0465	22	b0465	620
	b0467	3	b0467	71
	b0468	3	b0468	40
	b0469	5	b0469	121
	b0470	47	b0470	626
	b0471	64	b0471	747
	b0472	31	b0472	537
	b0473	264	b0473	4393
	b0474	55	b0474	709
	b0475	10	b0475	187
	b0476	13	b0476	219
	b0477	11	b0477	282
	b0478	52	b0478	564
	b0479	19	b0479	301
	b0480	98	b0480	1381
	b0481	5	b0481	54
	b0482	5	b0482	157
	b0483	12	b0483	115
	b0484	32	b0484	718
	b0485	55	b0485	825
	b0486	15	b0486	728
	b0487	9	b0487	208
	b0488	6	b0488	50
	b0489	25	b0489	210
	b0490	1	b0490	92
	b0491	3	b0491	85
	b0492	27	b0492	420
	b0493	3	b0493	144
	b0494	6	b0494	165
	b0495	6	b0495	166
	b0496	15	b0496	280
	b0497	16	b0497	521
	b0503	7	b0503	128
	b0504	1	b0504	84
	b0505	5	b0505	54
	b0506	30	b0506	693
	b0507	5	b0507	201
	b0508	2	b0508	137
	b0509	8	b0509	109
	b0512	11	b0512	175
	b0513	5	b0513	106
	b0514	4	b0514	110
	b0515	8	b0515	192
	b0516	3	b0516	162
	b0518	3	b0518	156
	b0521	2	b0521	89
	b0522	3	b0522	147
	b0523	1	b0523	25
	b0524	1	b0524	82
	b0525	69	b0525	1373
	b0526	29	b0526	254
	b0527	2	b0527	18
	b0529	15	b0529	425
	b0530	1	b0530	40
	b0532	172	b0532	850
	b0533	7	b0533	164
	b0535	1	b0535	41
	b0537	11	b0537	190
	b0540	1	b0540	21
	b0541	9	b0541	119
	b0543	4	b0543	47
	b0544	2	b0544	141
	b0545	2	b0545	42
	b0546	6	b0546	150
	b0547	1	b0547	29
	b0549	1	b0549	10
	b0550	2	b0550	19
	b0552	3	b0552	68
	b0556	1	b0556	12
	b0557	7	b0557	228
	b0559	3	b0559	37
	b0560	1	b0560	36
	b0564	2	b0564	107
	b0565	104	b0565	1416
	b0566	1	b0566	76
	b0567	4	b0567	72
	b0568	12	b0568	320
	b0569	5	b0569	188
	b0570	2	b0570	97
	b0571	5	b0571	46
	b0572	1	b0572	72
	b0573	1	b0573	46
	b0574	32	b0574	144
	b0575	3	b0575	355
	b0576	7	b0576	153
	b0577	16	b0577	343
	b0578	26	b0578	520
	b0579	5	b0579	174
	b0580	2	b0580	19
	b0581	19	b0581	189
	b0582	17	b0582	169
	b0583	1	b0583	45
	b0584	6	b0584	193
	b0585	2	b0585	140
	b0586	10	b0586	494
	b0587	1	b0587	101
	b0588	1	b0588	44
	b0590	1	b0590	89
	b0591	2	b0591	72
	b0593	4	b0593	112
	b0594	2	b0594	118
	b0595	1	b0595	65
	b0598	72	b0598	1023
	b0599	4	b0599	180
	b0600	6	b0600	117
	b0601	2	b0601	69
	b0602	3	b0602	60
	b0604	8	b0604	352
	b0605	1088	b0605	15063
	b0606	87	b0606	1244
	b0607	87	b0607	1368
	b0608	3	b0608	84
	b0610	10	b0610	106
	b0611	21	b0611	335
	b0612	1	b0612	81
	b0613	1	b0613	49
	b0615	1	b0615	124
	b0616	7	b0616	100
	b0618	1	b0618	87
	b0619	6	b0619	172
	b0620	7	b0620	92
	b0621	131	b0621	1974
	b0622	1	b0622	50
	b0623	185	b0623	2547
	b0624	5	b0624	95
	b0627	22	b0627	301
	b0628	50	b0628	704
	b0629	2	b0629	73
	b0630	9	b0630	179
	b0631	14	b0631	118
	b0632	31	b0632	437
	b0633	41	b0633	733
	b0634	16	b0634	344
	b0635	7	b0635	167
	b0636	2	b0636	139
	b0637	10	b0637	157
	b0638	1	b0638	116
	b0639	11	b0639	109
	b0640	17	b0640	251
	b0641	18	b0641	1062
	b0642	236	b0642	3165
	b0643	51	b0643	731
	b0644	1	b0644	99
	b0645	2	b0645	34
	b0646	1	b0646	102
	b0649	4	b0649	84
	b0650	3	b0650	97
	b0651	54	b0651	1176
	b0652	4	b0652	127
	b0653	2	b0653	67
	b0654	3	b0654	90
	b0655	18	b0655	283
	b0657	17	b0657	420
	b0658	63	b0658	1049
	b0659	16	b0659	362
	b0660	50	b0660	656
	b0661	19	b0661	301
	b0662	61	b0662	711
	b0674	35	b0674	451
	b0675	20	b0675	434
	b0676	46	b0676	736
	b0677	67	b0677	1009
	b0678	59	b0678	1207
	b0679	269	b0679	3404
	b0680	94	b0680	1476
	b0681	8	b0681	164
	b0682	3	b0682	50
	b0683	10	b0683	389
	b0684	29	b0684	524
	b0686	10	b0686	274
	b0687	35	b0687	374
	b0688	136	b0688	1759
	b0692	6	b0692	138
	b0693	3	b0693	183
	b0694	1	b0694	50
	b0695	23	b0695	407
	b0696	1	b0696	103
	b0697	10	b0697	287
	b0698	10	b0698	240
	b0699	26	b0699	221
	b0700	17	b0700	350
	b0704	1	b0704	83
	b0706	1	b0706	27
	b0707	10	b0707	191
	b0708	11	b0708	232
	b0709	8	b0709	121
	b0710	98	b0710	773
	b0711	25	b0711	375
	b0712	44	b0712	562
	b0713	15	b0713	136
	b0714	6	b0714	149
	b0715	13	b0715	225
	b0717	3	b0717	76
	b0718	6	b0718	222
	b0719	1	b0719	60
	b0720	591	b0720	8088
	b0721	13	b0721	313
	b0722	12	b0722	182
	b0723	145	b0723	2525
	b0724	59	b0724	774
	b0726	220	b0726	3056
	b0727	180	b0727	2733
	b0728	144	b0728	2179
	b0729	63	b0729	1177
	b0730	7	b0730	237
	b0731	3	b0731	143
	b0732	12	b0732	168
	b0733	2255	b0733	30125
	b0734	1822	b0734	24663
	b0735	29	b0735	777
	b0736	1	b0736	57
	b0737	12	b0737	105
	b0738	9	b0738	101
	b0739	16	b0739	423
	b0740	151	b0740	2329
	b0741	196	b0741	3486
	b0742	29	b0742	558
	b0750	4	b0750	147
	b0751	11	b0751	199
	b0752	15	b0752	181
	b0753	2	b0753	23
	b0754	44	b0754	726
	b0755	218	b0755	2952
	b0756	85	b0756	1495
	b0757	183	b0757	2037
	b0758	54	b0758	1084
	b0759	124	b0759	1734
	b0760	6	b0760	146
	b0761	7	b0761	202
	b0762	1	b0762	33
	b0763	12	b0763	299
	b0764	7	b0764	130
	b0765	11	b0765	157
	b0766	14	b0766	205
	b0767	121	b0767	1442
	b0768	1	b0768	78
	b0769	1	b0769	72
	b0770	3	b0770	142
	b0771	3	b0771	202
	b0772	34	b0772	441
	b0773	23	b0773	226
	b0774	2	b0774	72
	b0775	2	b0775	83
	b0776	1	b0776	129
	b0778	4	b0778	48
	b0779	32	b0779	659
	b0780	10	b0780	134
	b0781	14	b0781	342
	b0782	38	b0782	325
	b0783	21	b0783	376
	b0784	20	b0784	135
	b0785	19	b0785	333
	b0786	56	b0786	728
	b0787	2	b0787	46
	b0788	2	b0788	118
	b0789	5	b0789	107
	b0790	7	b0790	94
	b0791	24	b0791	172
	b0792	13	b0792	126
	b0793	14	b0793	228
	b0794	33	b0794	531
	b0795	43	b0795	404
	b0796	6	b0796	208
	b0797	19	b0797	252
	b0798	8	b0798	186
	b0799	21	b0799	217
	b0800	33	b0800	659
	b0801	24	b0801	291
	b0802	2	b0802	43
	b0804	7	b0804	71
	b0805	6	b0805	134
	b0806	11	b0806	67
	b0807	4	b0807	146
	b0808	12	b0808	281
	b0809	6	b0809	307
	b0810	8	b0810	309
	b0811	64	b0811	1142
	b0812	483	b0812	6895
	b0814	168	b0814	2416
	b0815	5	b0815	121
	b0817	9	b0817	78
	b0818	8	b0818	142
	b0819	17	b0819	237
	b0820	29	b0820	630
	b0821	6	b0821	175
	b0822	5	b0822	481
	b0823	11	b0823	397
	b0824	1	b0824	64
	b0825	1	b0825	99
	b0826	12	b0826	317
	b0827	45	b0827	754
	b0828	40	b0828	436
	b0829	50	b0829	493
	b0830	38	b0830	654
	b0831	21	b0831	100
	b0832	9	b0832	133
	b0833	3	b0833	226
	b0834	3	b0834	95
	b0835	10	b0835	188
	b0836	81	b0836	1445
	b0837	8	b0837	244
	b0838	39	b0838	511
	b0839	45	b0839	588
	b0840	7	b0840	168
	b0841	3	b0841	83
	b0842	9	b0842	145
	b0843	1	b0843	31
	b0844	7	b0844	178
	b0845	9	b0845	140
	b0846	6	b0846	89
	b0847	14	b0847	259
	b0848	2	b0848	102
	b0849	2	b0849	70
	b0850	3	b0850	83
	b0851	27	b0851	321
	b0852	12	b0852	184
	b0853	14	b0853	227
	b0854	1	b0854	151
	b0855	2	b0855	50
	b0856	1	b0856	45
	b0858	1	b0858	39
	b0859	3	b0859	97
	b0860	6	b0860	113
	b0861	15	b0861	492
	b0862	23	b0862	432
	b0863	100	b0863	1651
	b0864	26	b0864	477
	b0865	52	b0865	761
	b0866	31	b0866	193
	b0867	16	b0867	212
	b0868	10	b0868	180
	b0869	15	b0869	428
	b0870	33	b0870	392
	b0871	58	b0871	912
	b0872	21	b0872	157
	b0873	47	b0873	696
	b0874	3	b0874	165
	b0875	4	b0875	40
	b0876	30	b0876	585
	b0877	36	b0877	719
	b0878	11	b0878	215
	b0879	10	b0879	272
	b0880	25	b0880	536
	b0881	27	b0881	428
	b0882	281	b0882	4362
	b0884	23	b0884	320
	b0885	3	b0885	57
	b0886	13	b0886	407
	b0887	15	b0887	390
	b0888	37	b0888	492
	b0889	31	b0889	687
	b0890	113	b0890	1650
	b0891	18	b0891	400
	b0892	9	b0892	143
	b0893	450	b0893	6368
	b0894	666	b0894	8611
	b0895	167	b0895	2606
	b0896	196	b0896	2598
	b0897	69	b0897	852
	b0898	2	b0898	123
	b0899	4	b0899	132
	b0900	1	b0900	63
	b0901	4	b0901	72
	b0902	26	b0902	484
	b0903	10403	b0903	126528
	b0904	298	b0904	3922
	b0905	18	b0905	448
	b0906	24	b0906	252
	b0907	63	b0907	753
	b0908	16	b0908	274
	b0909	4	b0909	38
	b0910	23	b0910	497
	b0911	1178	b0911	15296
	b0912	45	b0912	896
	b0913	9	b0913	177
	b0914	42	b0914	722
	b0915	10	b0915	216
	b0916	6	b0916	138
	b0917	18	b0917	249
	b0918	29	b0918	562
	b0919	92	b0919	1586
	b0920	5	b0920	558
	b0921	18	b0921	293
	b0922	15	b0922	404
	b0923	25	b0923	284
	b0924	164	b0924	2643
	b0925	46	b0925	599
	b0926	33	b0926	611
	b0927	28	b0927	556
	b0928	349	b0928	4280
	b0929	1698	b0929	29478
	b0930	74	b0930	1459
	b0931	22	b0931	403
	b0932	264	b0932	4212
	b0933	2	b0933	56
	b0935	5	b0935	63
	b0938	1	b0938	39
	b0939	3	b0939	53
	b0940	3	b0940	174
	b0941	5	b0941	64
	b0944	1	b0944	101
	b0945	9	b0945	194
	b0946	8	b0946	219
	b0947	11	b0947	417
	b0948	37	b0948	505
	b0949	61	b0949	872
	b0950	5	b0950	162
	b0951	15	b0951	311
	b0952	5	b0952	130
	b0953	176	b0953	2153
	b0954	60	b0954	899
	b0955	41	b0955	699
	b0956	17	b0956	244
	b0957	3569	b0957	49795
	b0958	18	b0958	264
	b0959	9	b0959	227
	b0960	15	b0960	304
	b0961	6	b0961	145
	b0962	37	b0962	770
	b0963	40	b0963	591
	b0964	2	b0964	98
	b0965	21	b0965	257
	b0966	4	b0966	91
	b0967	13	b0967	493
	b0968	3	b0968	48
	b0969	10	b0969	118
	b0970	202	b0970	2478
	b0972	5	b0972	84
	b0973	9	b0973	259
	b0974	2	b0974	35
	b0975	1	b0975	33
	b0976	2	b0976	15
	b0977	4	b0977	65
	b0978	8	b0978	284
	b0979	8	b0979	106
	b0980	3	b0980	240
	b0981	13	b0981	219
	b0982	1	b0982	36
	b0983	5	b0983	80
	b0984	5	b0984	126
	b0986	1	b0986	69
	b0987	4	b0987	71
	b0988	1	b0988	24
	b0990	1	b0990	42
	b0991	2	b0991	10
	b0992	8	b0992	390
	b0993	2	b0993	261
	b0994	3	b0994	145
	b0995	3	b0995	96
	b0996	4	b0996	101
	b0997	8	b0997	368
	b0998	1	b0998	37
	b0999	5	b0999	164
	b1000	59	b1000	640
	b1002	255	b1002	4185
	b1003	40	b1003	573
	b1004	505	b1004	6641
	b1006	1	b1006	82
	b1007	1	b1007	39
	b1008	3	b1008	32
	b1011	1	b1011	50
	b1013	2	b1013	138
	b1014	26	b1014	735
	b1015	5	b1015	280
	b1018	3	b1018	73
	b1019	2	b1019	59
	b1020	3	b1020	106
	b1021	2	b1021	51
	b1022	3	b1022	92
	b1023	6	b1023	113
	b1024	8	b1024	205
	b1025	3	b1025	135
	b1026	5	b1026	100
	b1027	3	b1027	24
	b1029	1	b1029	110
	b1033	31	b1033	520
	b1034	28	b1034	443
	b1035	17	b1035	168
	b1036	3	b1036	122
	b1037	2	b1037	41
	b1038	1	b1038	19
	b1040	4	b1040	39
	b1041	1	b1041	60
	b1042	1	b1042	51
	b1045	16	b1045	220
	b1046	11	b1046	174
	b1047	1	b1047	90
	b1048	87	b1048	1550
	b1049	74	b1049	1846
	b1050	2	b1050	81
	b1051	37	b1051	418
	b1053	7	b1053	120
	b1054	20	b1054	231
	b1055	3	b1055	60
	b1059	27	b1059	448
	b1060	6	b1060	167
	b1061	1	b1061	22
	b1062	15	b1062	161
	b1063	10	b1063	198
	b1064	147	b1064	2067
	b1065	3	b1065	100
	b1066	28	b1066	318
	b1067	26	b1067	386
	b1068	26	b1068	371
	b1069	11	b1069	225
	b1072	7	b1072	106
	b1073	8	b1073	243
	b1074	9	b1074	191
	b1075	12	b1075	228
	b1076	38	b1076	705
	b1077	8	b1077	75
	b1078	7	b1078	181
	b1079	2	b1079	109
	b1081	1	b1081	76
	b1082	7	b1082	163
	b1083	9	b1083	197
	b1084	228	b1084	3542
	b1085	10	b1085	174
	b1086	13	b1086	1320
	b1087	13	b1087	348
	b1088	119	b1088	1926
	b1089	92	b1089	1331
	b1090	30	b1090	514
	b1091	107	b1091	1368
	b1092	193	b1092	2451
	b1093	439	b1093	5010
	b1094	211	b1094	3065
	b1095	83	b1095	1227
	b1096	6	b1096	58
	b1097	8	b1097	237
	b1098	10	b1098	368
	b1099	11	b1099	356
	b1100	21	b1100	353
	b1101	165	b1101	2402
	b1102	6	b1102	170
	b1103	54	b1103	968
	b1104	21	b1104	172
	b1105	81	b1105	669
	b1106	14	b1106	217
	b1107	114	b1107	1369
	b1108	66	b1108	1149
	b1109	63	b1109	1084
	b1111	13	b1111	262
	b1112	3	b1112	22
	b1113	9	b1113	193
	b1114	43	b1114	697
	b1115	2	b1115	73
	b1116	14	b1116	240
	b1117	14	b1117	132
	b1118	24	b1118	452
	b1119	20	b1119	270
	b1120	29	b1120	443
	b1121	2	b1121	55
	b1123	134	b1123	1969
	b1124	30	b1124	427
	b1125	9	b1125	120
	b1126	12	b1126	285
	b1127	288	b1127	4103
	b1128	66	b1128	736
	b1129	26	b1129	505
	b1130	71	b1130	1420
	b1131	39	b1131	434
	b1132	8	b1132	137
	b1133	28	b1133	689
	b1134	4	b1134	121
	b1135	19	b1135	147
	b1136	698	b1136	8848
	b1137	5	b1137	126
	b1138	6	b1138	273
	b1139	12	b1139	208
	b1140	1	b1140	83
	b1141	1	b1141	14
	b1143	8	b1143	39
	b1144	1	b1144	38
	b1145	1	b1145	178
	b1146	6	b1146	39
	b1147	1	b1147	34
	b1148	1	b1148	28
	b1150	1	b1150	17
	b1153	3	b1153	31
	b1154	3	b1154	40
	b1155	2	b1155	32
	b1158	1	b1158	39
	b1159	3	b1159	89
	b1160	2	b1160	20
	b1162	8	b1162	131
	b1163	2	b1163	92
	b1166	1	b1166	39
	b1171	1	b1171	19
	b1174	17	b1174	157
	b1175	79	b1175	1286
	b1176	38	b1176	390
	b1177	8	b1177	138
	b1178	24	b1178	288
	b1179	13	b1179	141
	b1180	17	b1180	233
	b1181	11	b1181	196
	b1182	1	b1182	146
	b1184	3	b1184	93
	b1185	8	b1185	90
	b1186	24	b1186	423
	b1187	31	b1187	409
	b1188	56	b1188	640
	b1189	15	b1189	310
	b1190	8	b1190	234
	b1191	18	b1191	387
	b1192	14	b1192	160
	b1193	9	b1193	59
	b1194	2	b1194	66
	b1195	3	b1195	53
	b1197	28	b1197	919
	b1198	6	b1198	221
	b1199	9	b1199	80
	b1200	26	b1200	292
	b1201	17	b1201	216
	b1202	10	b1202	428
	b1203	41	b1203	577
	b1204	2	b1204	149
	b1205	145	b1205	2913
	b1206	17	b1206	238
	b1207	78	b1207	1341
	b1208	73	b1208	859
	b1209	30	b1209	171
	b1210	15	b1210	216
	b1211	23	b1211	269
	b1212	3	b1212	91
	b1213	2	b1213	37
	b1214	20	b1214	122
	b1215	81	b1215	1531
	b1216	9	b1216	234
	b1217	5	b1217	38
	b1218	6	b1218	119
	b1219	26	b1219	457
	b1220	9	b1220	199
	b1221	71	b1221	954
	b1222	43	b1222	586
	b1223	155	b1223	2289
	b1224	581	b1224	8019
	b1225	297	b1225	4176
	b1226	121	b1226	1640
	b1227	197	b1227	2436
	b1229	1	b1229	96
	b1232	13	b1232	203
	b1233	3	b1233	199
	b1234	16	b1234	296
	b1235	9	b1235	583
	b1236	80	b1236	3465
	b1237	507	b1237	5283
	b1238	1	b1238	15075
	b1241	3313	b1241	31434
	b1242	3	b1242	4045
	b1243	761	b1243	8601
	b1244	103	b1244	2012
	b1245	179	b1245	2476
	b1246	233	b1246	3036
	b1247	198	b1247	2354
	b1248	2	b1248	129
	b1249	27	b1249	236
	b1250	8	b1250	227
	b1251	6	b1251	140
	b1252	1	b1252	41
	b1253	3	b1253	45
	b1254	7	b1254	116
	b1255	11	b1255	8444
	b1256	1443	b1256	17462
	b1257	10	b1257	130
	b1258	3	b1258	58
	b1260	6	b1260	213
	b1261	10	b1261	167
	b1262	6	b1262	114
	b1263	5	b1263	116
	b1264	1	b1264	99
	b1266	12	b1266	969
	b1267	15	b1267	439
	b1268	11	b1268	191
	b1269	13	b1269	496
	b1270	10	b1270	251
	b1271	10	b1271	234
	b1272	23	b1272	405
	b1273	12	b1273	285
	b1274	80	b1274	1139
	b1275	10	b1275	279
	b1276	165	b1276	1945
	b1277	11	b1277	251
	b1278	12	b1278	927
	b1279	19	b1279	226
	b1280	8	b1280	300
	b1281	3	b1281	96
	b1282	2	b1282	41
	b1283	15	b1283	59
	b1284	17	b1284	205
	b1285	12	b1285	393
	b1286	40	b1286	785
	b1287	3	b1287	136
	b1288	208	b1288	3422
	b1289	2	b1289	35
	b1290	14	b1290	155
	b1291	16	b1291	287
	b1292	15	b1292	262
	b1293	11	b1293	120
	b1294	15	b1294	385
	b1295	2	b1295	45
	b1296	4	b1296	78
	b1297	6	b1297	145
	b1298	2	b1298	79
	b1299	2	b1299	98
	b1300	1	b1300	96
	b1301	3	b1301	86
	b1302	9	b1302	153
	b1303	12	b1303	101
	b1304	34	b1304	285
	b1305	4	b1305	88
	b1306	5	b1306	95
	b1307	2	b1307	20
	b1308	31	b1308	404
	b1309	2	b1309	232
	b1310	3	b1310	90
	b1311	2	b1311	45
	b1312	2	b1312	65
	b1313	4	b1313	79
	b1314	3	b1314	104
	b1315	4	b1315	112
	b1316	5	b1316	205
	b1317	1	b1317	34
	b1320	3	b1320	171
	b1321	7	b1321	197
	b1322	8	b1322	162
	b1323	37	b1323	633
	b1324	223	b1324	3351
	b1325	15	b1325	137
	b1326	13	b1326	161
	b1327	3	b1327	77
	b1328	4	b1328	121
	b1329	28	b1329	461
	b1330	9	b1330	289
	b1332	9	b1332	161
	b1333	192	b1333	2985
	b1334	39	b1334	1062
	b1335	1	b1335	94
	b1336	4	b1336	138
	b1337	3	b1337	122
	b1338	5	b1338	125
	b1339	7	b1339	77
	b1340	5	b1340	70
	b1341	20	b1341	387
	b1342	23	b1342	238
	b1343	6	b1343	123
	b1344	7	b1344	120
	b1345	13	b1345	249
	b1350	5	b1350	219
	b1352	1	b1352	13
	b1356	14	b1356	199
	b1357	1	b1357	13
	b1359	3	b1359	106
	b1360	2	b1360	37
	b1363	8	b1363	235
	b1370	3	b1370	91
	b1372	17	b1372	239
	b1374	4	b1374	26
	b1376	185	b1376	2388
	b1377	22	b1377	1209
	b1378	129	b1378	2016
	b1379	2	b1379	70
	b1380	56	b1380	919
	b1381	17	b1381	431
	b1382	4	b1382	10
	b1383	2	b1383	90
	b1385	2	b1385	105
	b1386	2	b1386	216
	b1387	2	b1387	150
	b1388	1	b1388	71
	b1390	2	b1390	76
	b1391	2	b1391	44
	b1392	2	b1392	52
	b1394	4	b1394	62
	b1395	2	b1395	84
	b1397	4	b1397	59
	b1398	4	b1398	109
	b1399	24	b1399	417
	b1400	11	b1400	90
	b1402	13	b1402	58
	b1403	3	b1403	60
	b1404	20	b1404	154
	b1406	25	b1406	446
	b1408	1	b1408	95
	b1410	5	b1410	128
	b1411	7	b1411	150
	b1412	10	b1412	147
	b1413	134	b1413	1649
	b1414	8	b1414	158
	b1415	63	b1415	824
	b1418	36	b1418	444
	b1419	40	b1419	431
	b1421	2	b1421	102
	b1423	20	b1423	426
	b1424	21	b1424	394
	b1426	62	b1426	978
	b1427	18	b1427	384
	b1428	7	b1428	162
	b1429	13	b1429	180
	b1430	12	b1430	311
	b1431	19	b1431	346
	b1432	4	b1432	313
	b1433	5	b1433	205
	b1434	2	b1434	149
	b1435	13	b1435	208
	b1436	1	b1436	36
	b1438	1	b1438	108
	b1439	18	b1439	154
	b1440	15	b1440	240
	b1441	3	b1441	79
	b1442	7	b1442	82
	b1443	4	b1443	155
	b1444	48	b1444	569
	b1445	1	b1445	25
	b1446	6	b1446	200
	b1447	1	b1447	62
	b1448	5	b1448	180
	b1449	35	b1449	478
	b1450	1	b1450	37
	b1451	4	b1451	140
	b1452	4	b1452	87
	b1453	5	b1453	143
	b1454	3	b1454	48
	b1455	1	b1455	35
	b1457	3	b1457	130
	b1460	2	b1460	39
	b1461	3	b1461	100
	b1462	3	b1462	81
	b1463	17	b1463	103
	b1464	10	b1464	212
	b1465	4	b1465	64
	b1466	3	b1466	50
	b1467	11	b1467	198
	b1468	19	b1468	406
	b1469	4	b1469	176
	b1473	7	b1473	160
	b1474	117	b1474	1777
	b1475	23	b1475	284
	b1476	12	b1476	175
	b1477	5	b1477	61
	b1478	6	b1478	205
	b1479	139	b1479	1925
	b1480	16	b1480	488
	b1482	22	b1482	410
	b1483	2	b1483	99
	b1484	1	b1484	103
	b1486	1	b1486	77
	b1487	2	b1487	95
	b1488	2	b1488	41
	b1489	4	b1489	197
	b1490	4	b1490	106
	b1491	3	b1491	146
	b1492	25	b1492	498
	b1493	143	b1493	1530
	b1494	7	b1494	233
	b1495	8	b1495	310
	b1496	2	b1496	103
	b1497	4	b1497	153
	b1498	286	b1498	3959
	b1499	2	b1499	95
	b1501	13	b1501	183
	b1502	2	b1502	61
	b1503	1	b1503	26
	b1507	15	b1507	250
	b1508	6	b1508	94
	b1511	4	b1511	272
	b1512	5	b1512	236
	b1513	2	b1513	168
	b1514	4	b1514	58
	b1516	15	b1516	83
	b1517	11	b1517	157
	b1518	4	b1518	48
	b1519	5	b1519	121
	b1521	32	b1521	891
	b1522	5	b1522	234
	b1523	4	b1523	48
	b1524	6	b1524	84
	b1525	19	b1525	250
	b1526	3	b1526	79
	b1528	3	b1528	105
	b1529	6	b1529	98
	b1530	5	b1530	40
	b1531	2	b1531	55
	b1532	2	b1532	34
	b1533	7	b1533	175
	b1534	3	b1534	93
	b1535	3	b1535	115
	b1537	1	b1537	34
	b1538	85	b1538	1419
	b1539	92	b1539	1284
	b1540	7	b1540	179
	b1541	55	b1541	841
	b1542	4	b1542	74
	b1545	1	b1545	27
	b1547	2	b1547	51
	b1550	18	b1550	385
	b1554	2	b1554	41
	b1557	1	b1557	43
	b1563	5	b1563	65
	b1564	26	b1564	308
	b1565	2	b1565	34
	b1566	1	b1566	61
	b1570	7	b1570	132
	b1571	1	b1571	9
	b1580	2	b1580	64
	b1581	4	b1581	132
	b1583	12	b1583	319
	b1584	6	b1584	213
	b1585	5	b1585	69
	b1586	12	b1586	84
	b1587	274	b1587	3604
	b1588	236	b1588	3517
	b1589	39	b1589	559
	b1590	60	b1590	664
	b1591	20	b1591	358
	b1592	2	b1592	103
	b1593	51	b1593	553
	b1594	63	b1594	1350
	b1595	1	b1595	105
	b1596	9	b1596	143
	b1597	1	b1597	37
	b1598	24	b1598	356
	b1599	2	b1599	22
	b1600	12	b1600	136
	b1601	7	b1601	211
	b1602	274	b1602	3843
	b1603	305	b1603	4782
	b1604	87	b1604	1052
	b1605	4	b1605	142
	b1606	3	b1606	86
	b1607	5	b1607	93
	b1608	28	b1608	296
	b1609	15	b1609	259
	b1610	8	b1610	136
	b1611	21	b1611	298
	b1612	103	b1612	1454
	b1613	51	b1613	710
	b1614	118	b1614	2070
	b1615	3	b1615	92
	b1616	3	b1616	127
	b1617	15	b1617	382
	b1618	13	b1618	203
	b1619	49	b1619	1036
	b1620	3	b1620	98
	b1621	36	b1621	555
	b1622	24	b1622	458
	b1623	65	b1623	1127
	b1624	14	b1624	304
	b1625	1	b1625	17
	b1626	3	b1626	67
	b1627	3	b1627	55
	b1628	2	b1628	33
	b1629	9	b1629	248
	b1630	8	b1630	190
	b1631	2	b1631	37
	b1632	2	b1632	123
	b1633	2	b1633	60
	b1634	76	b1634	1023
	b1635	17	b1635	331
	b1636	4	b1636	163
	b1637	71	b1637	1063
	b1638	26	b1638	349
	b1639	3	b1639	65
	b1640	32	b1640	328
	b1641	245	b1641	2156
	b1642	9	b1642	383
	b1643	1	b1643	30
	b1644	4	b1644	113
	b1645	7	b1645	248
	b1646	17	b1646	309
	b1647	58	b1647	703
	b1648	1	b1648	31
	b1649	3	b1649	86
	b1650	21	b1650	285
	b1651	69	b1651	991
	b1652	6	b1652	116
	b1653	31	b1653	547
	b1654	13	b1654	226
	b1655	6	b1655	183
	b1656	606	b1656	7891
	b1657	3	b1657	160
	b1658	10	b1658	292
	b1659	3	b1659	144
	b1660	8	b1660	222
	b1661	73	b1661	1114
	b1662	26	b1662	318
	b1663	15	b1663	210
	b1664	51	b1664	721
	b1667	24	b1667	300
	b1668	6	b1668	190
	b1669	4	b1669	115
	b1670	10	b1670	98
	b1671	8	b1671	134
	b1672	8	b1672	87
	b1673	67	b1673	1090
	b1674	36	b1674	590
	b1675	5	b1675	25
	b1676	306	b1676	5717
	b1677	2183	b1677	29510
	b1678	17	b1678	394
	b1679	1	b1679	115
	b1680	13	b1680	302
	b1681	14	b1681	183
	b1682	7	b1682	114
	b1683	19	b1683	302
	b1684	9	b1684	67
	b1685	19	b1685	273
	b1686	14	b1686	185
	b1687	47	b1687	895
	b1688	28	b1688	354
	b1689	1	b1689	50
	b1690	3	b1690	66
	b1691	2	b1691	96
	b1692	10	b1692	104
	b1693	11	b1693	241
	b1694	4	b1694	133
	b1696	4	b1696	87
	b1697	2	b1697	61
	b1698	1	b1698	59
	b1699	2	b1699	77
	b1700	1	b1700	10
	b1701	1	b1701	78
	b1702	292	b1702	4377
	b1703	24	b1703	338
	b1704	6	b1704	51
	b1705	1	b1705	17
	b1706	21	b1706	297
	b1707	3	b1707	44
	b1708	10	b1708	253
	b1709	6	b1709	126
	b1710	14	b1710	137
	b1711	7	b1711	188
	b1712	50	b1712	833
	b1713	341	b1713	5176
	b1714	99	b1714	1325
	b1716	190	b1716	3302
	b1717	109	b1717	1620
	b1718	153	b1718	2567
	b1719	633	b1719	8815
	b1723	45	b1723	789
	b1724	16	b1724	248
	b1725	138	b1725	1879
	b1726	6	b1726	140
	b1727	6	b1727	111
	b1729	62	b1729	1134
	b1732	93	b1732	1408
	b1733	13	b1733	139
	b1734	12	b1734	207
	b1735	6	b1735	119
	b1736	12	b1736	121
	b1737	10	b1737	273
	b1738	3	b1738	206
	b1739	61	b1739	635
	b1740	25	b1740	446
	b1741	6	b1741	97
	b1743	3	b1743	97
	b1744	1	b1744	56
	b1746	2	b1746	69
	b1747	1	b1747	64
	b1748	1	b1748	54
	b1749	13	b1749	168
	b1750	8	b1750	114
	b1751	23	b1751	413
	b1752	8	b1752	200
	b1753	9	b1753	140
	b1754	11	b1754	167
	b1755	8	b1755	175
	b1756	6	b1756	92
	b1757	109	b1757	2002
	b1758	6	b1758	119
	b1761	45	b1761	406
	b1762	2	b1762	93
	b1763	23	b1763	353
	b1764	85	b1764	1259
	b1765	33	b1765	338
	b1766	20	b1766	851
	b1767	11	b1767	116
	b1768	4	b1768	47
	b1769	1	b1769	103
	b1770	2	b1770	129
	b1771	6	b1771	80
	b1772	10	b1772	138
	b1773	2	b1773	153
	b1774	1	b1774	149
	b1775	6	b1775	126
	b1777	6	b1777	58
	b1778	30	b1778	321
	b1779	3597	b1779	50651
	b1780	98	b1780	1295
	b1781	10	b1781	244
	b1782	72	b1782	1071
	b1783	80	b1783	1298
	b1784	7	b1784	164
	b1785	4	b1785	154
	b1786	1	b1786	150
	b1787	25	b1787	215
	b1788	1	b1788	19
	b1789	6	b1789	49
	b1790	2	b1790	129
	b1791	4	b1791	102
	b1792	10	b1792	223
	b1793	8	b1793	161
	b1794	17	b1794	168
	b1795	15	b1795	123
	b1796	1	b1796	9
	b1798	3	b1798	128
	b1799	16	b1799	266
	b1800	18	b1800	361
	b1801	5	b1801	120
	b1802	1	b1802	160
	b1803	1	b1803	60
	b1804	8	b1804	130
	b1805	11	b1805	220
	b1806	8	b1806	82
	b1807	25	b1807	316
	b1808	8	b1808	366
	b1809	33	b1809	474
	b1810	6	b1810	79
	b1811	3	b1811	47
	b1812	5	b1812	160
	b1813	6	b1813	134
	b1814	60	b1814	750
	b1815	4	b1815	108
	b1816	46	b1816	1028
	b1817	947	b1817	11967
	b1818	657	b1818	9873
	b1819	596	b1819	8955
	b1821	3	b1821	75
	b1822	4	b1822	56
	b1823	72	b1823	3049
	b1824	2420	b1824	26768
	b1825	2	b1825	27
	b1826	2	b1826	28
	b1827	31	b1827	489
	b1828	4	b1828	111
	b1829	34	b1829	784
	b1830	56	b1830	1017
	b1831	66	b1831	965
	b1832	18	b1832	367
	b1833	7	b1833	108
	b1834	14	b1834	302
	b1835	9	b1835	176
	b1836	13	b1836	126
	b1837	2	b1837	71
	b1838	3	b1838	29
	b1839	4	b1839	112
	b1840	13	b1840	146
	b1841	5	b1841	136
	b1842	9	b1842	73
	b1843	8	b1843	89
	b1844	9	b1844	92
	b1845	17	b1845	399
	b1846	12	b1846	157
	b1847	14	b1847	198
	b1848	17	b1848	342
	b1849	7	b1849	176
	b1850	82	b1850	859
	b1851	135	b1851	1644
	b1852	81	b1852	1415
	b1853	42	b1853	527
	b1854	554	b1854	7283
	b1855	14	b1855	408
	b1856	32	b1856	503
	b1857	21	b1857	140
	b1858	12	b1858	173
	b1859	8	b1859	153
	b1860	6	b1860	332
	b1861	17	b1861	322
	b1862	2	b1862	38
	b1863	10	b1863	187
	b1864	130	b1864	2250
	b1865	24	b1865	284
	b1866	249	b1866	5146
	b1867	22	b1867	215
	b1868	5	b1868	173
	b1869	10	b1869	256
	b1870	5	b1870	149
	b1871	6	b1871	264
	b1872	9	b1872	167
	b1873	2	b1873	72
	b1874	9	b1874	71
	b1875	7	b1875	82
	b1876	42	b1876	616
	b1879	3	b1879	216
	b1880	2	b1880	62
	b1881	3	b1881	43
	b1882	2	b1882	63
	b1883	3	b1883	44
	b1885	5	b1885	111
	b1886	4	b1886	241
	b1887	2	b1887	82
	b1888	1	b1888	97
	b1889	1	b1889	52
	b1890	3	b1890	52
	b1891	1	b1891	80
	b1892	3	b1892	64
	b1893	1	b1893	20
	b1895	15	b1895	562
	b1896	39	b1896	522
	b1897	32	b1897	409
	b1900	23	b1900	334
	b1901	28	b1901	539
	b1902	17	b1902	332
	b1904	1	b1904	27
	b1905	216	b1905	3240
	b1906	3	b1906	99
	b1907	8	b1907	161
	b1908	46	b1908	548
	b1912	21	b1912	223
	b1913	34	b1913	449
	b1914	14	b1914	272
	b1915	1	b1915	38
	b1916	6	b1916	79
	b1917	5	b1917	231
	b1918	3	b1918	156
	b1919	30	b1919	323
	b1920	126	b1920	1383
	b1921	2	b1921	129
	b1922	4	b1922	103
	b1923	44	b1923	772
	b1924	3	b1924	106
	b1927	22	b1927	349
	b1928	2	b1928	131
	b1929	126	b1929	1663
	b1930	11	b1930	290
	b1931	5	b1931	54
	b1932	2	b1932	50
	b1937	1	b1937	21
	b1938	3	b1938	147
	b1939	6	b1939	98
	b1940	4	b1940	54
	b1941	6	b1941	74
	b1943	1	b1943	143
	b1944	1	b1944	67
	b1945	7	b1945	148
	b1946	1	b1946	38
	b1947	1	b1947	21
	b1950	1	b1950	69
	b1951	4	b1951	93
	b1953	7	b1953	142
	b1955	5	b1955	99
	b1956	7	b1956	204
	b1957	6	b1957	29
	b1958	25	b1958	195
	b1959	2	b1959	42
	b1960	3	b1960	80
	b1961	29	b1961	220
	b1962	1	b1962	92
	b1967	49	b1967	1176
	b1968	4	b1968	117
	b1969	1	b1969	67
	b1970	3	b1970	40
	b1971	8	b1971	160
	b1972	2	b1972	63
	b1973	3	b1973	127
	b1974	1	b1974	73
	b1976	35	b1976	408
	b1978	17	b1978	579
	b1981	4	b1981	219
	b1982	83	b1982	1057
	b1983	52	b1983	926
	b1985	5	b1985	165
	b1987	1	b1987	74
	b1988	3	b1988	566
	b1990	10	b1990	203
	b1991	19	b1991	211
	b1992	20	b1992	301
	b1993	5	b1993	59
	b1994	1	b1994	5
	b1996	19	b1996	46
	b1997	5	b1997	59
	b2000	215	b2000	3422
	b2001	19	b2001	285
	b2002	2	b2002	56
	b2003	1	b2003	12
	b2005	1	b2005	21
	b2007	54	b2007	714
	b2008	6	b2008	205
	b2009	14	b2009	200
	b2010	9	b2010	148
	b2011	42	b2011	653
	b2012	3	b2012	73
	b2013	30	b2013	387
	b2014	11	b2014	247
	b2015	7	b2015	138
	b2016	54	b2016	787
	b2017	28	b2017	209
	b2018	1	b2018	5
	b2019	28	b2019	428
	b2020	20	b2020	363
	b2021	31	b2021	310
	b2022	36	b2022	430
	b2023	13	b2023	206
	b2024	21	b2024	299
	b2025	17	b2025	345
	b2026	12	b2026	498
	b2027	31	b2027	350
	b2028	4	b2028	72
	b2029	364	b2029	5560
	b2032	59	b2032	1084
	b2033	41	b2033	442
	b2034	56	b2034	853
	b2035	39	b2035	553
	b2036	97	b2036	1406
	b2037	38	b2037	841
	b2038	18	b2038	370
	b2039	53	b2039	755
	b2040	31	b2040	625
	b2041	54	b2041	435
	b2042	43	b2042	563
	b2043	4	b2043	107
	b2044	7	b2044	108
	b2045	5	b2045	82
	b2047	2	b2047	134
	b2048	2	b2048	92
	b2050	2	b2050	81
	b2052	4	b2052	56
	b2053	3	b2053	78
	b2055	1	b2055	41
	b2056	6	b2056	209
	b2057	3	b2057	85
	b2059	1	b2059	39
	b2060	4	b2060	156
	b2061	1	b2061	26
	b2063	16	b2063	339
	b2064	18	b2064	440
	b2065	43	b2065	787
	b2066	8	b2066	137
	b2067	11	b2067	327
	b2068	15	b2068	198
	b2069	5	b2069	97
	b2070	5	b2070	135
	b2071	1	b2071	38
	b2073	2	b2073	45
	b2074	9	b2074	122
	b2075	8	b2075	696
	b2076	2	b2076	302
	b2077	5	b2077	65
	b2078	8	b2078	114
	b2079	7	b2079	64
	b2080	12	b2080	183
	b2081	14	b2081	244
	b2085	2	b2085	36
	b2086	8	b2086	100
	b2088	4	b2088	28
	b2089	9	b2089	101
	b2091	2433	b2091	30066
	b2093	2408	b2093	32610
	b2094	1618	b2094	23330
	b2095	7029	b2095	87347
	b2096	4284	b2096	56900
	b2097	143	b2097	1910
	b2098	6	b2098	158
	b2099	8	b2099	105
	b2100	2	b2100	122
	b2101	7	b2101	53
	b2102	4	b2102	58
	b2103	1	b2103	139
	b2104	1	b2104	76
	b2105	4	b2105	88
	b2106	1	b2106	50
	b2107	10	b2107	150
	b2108	2	b2108	181
	b2109	3	b2109	198
	b2110	1	b2110	52
	b2111	9	b2111	149
	b2112	4	b2112	88
	b2113	137	b2113	2071
	b2114	74	b2114	883
	b2118	3	b2118	242
	b2119	1	b2119	81
	b2120	5	b2120	148
	b2121	2	b2121	77
	b2123	1	b2123	53
	b2124	4	b2124	200
	b2125	16	b2125	293
	b2126	31	b2126	599
	b2127	15	b2127	288
	b2128	5	b2128	61
	b2129	5	b2129	109
	b2130	3	b2130	128
	b2131	4	b2131	146
	b2132	52	b2132	954
	b2133	93	b2133	1084
	b2134	8	b2134	103
	b2135	5	b2135	97
	b2136	3	b2136	174
	b2137	7	b2137	235
	b2140	2	b2140	89
	b2141	4	b2141	66
	b2142	7	b2142	135
	b2143	14	b2143	251
	b2144	2	b2144	40
	b2146	177	b2146	2373
	b2147	167	b2147	2381
	b2148	17	b2148	531
	b2149	27	b2149	315
	b2150	146	b2150	1966
	b2151	8	b2151	317
	b2152	2	b2152	83
	b2153	30	b2153	475
	b2154	24	b2154	376
	b2155	4	b2155	162
	b2156	14	b2156	224
	b2157	12	b2157	260
	b2158	8	b2158	108
	b2159	16	b2159	247
	b2160	11	b2160	62
	b2161	5	b2161	102
	b2162	3	b2162	74
	b2163	3	b2163	49
	b2164	5	b2164	106
	b2165	2	b2165	96
	b2166	5	b2166	96
	b2167	89	b2167	844
	b2168	34	b2168	557
	b2169	29	b2169	591
	b2170	3	b2170	104
	b2171	2	b2171	119
	b2172	14	b2172	194
	b2173	4	b2173	141
	b2174	5	b2174	117
	b2175	52	b2175	852
	b2176	8	b2176	324
	b2177	11	b2177	164
	b2178	7	b2178	75
	b2179	6	b2179	78
	b2180	15	b2180	277
	b2181	6	b2181	130
	b2182	11	b2182	101
	b2183	2	b2183	101
	b2184	3	b2184	331
	b2185	46	b2185	806
	b2186	29	b2186	399
	b2187	5	b2187	80
	b2188	13	b2188	373
	b2193	28	b2193	268
	b2194	28	b2194	411
	b2195	9	b2195	271
	b2196	64	b2196	654
	b2197	20	b2197	268
	b2198	9	b2198	107
	b2199	44	b2199	526
	b2200	7	b2200	343
	b2201	13	b2201	285
	b2202	50	b2202	694
	b2203	60	b2203	1096
	b2204	51	b2204	712
	b2205	39	b2205	420
	b2206	441	b2206	6558
	b2207	2	b2207	11
	b2208	9	b2208	44
	b2209	66	b2209	955
	b2210	3	b2210	98
	b2212	9	b2212	124
	b2213	20	b2213	239
	b2214	8	b2214	428
	b2215	8092	b2215	106873
	b2216	84	b2216	1318
	b2217	75	b2217	1444
	b2218	24	b2218	555
	b2219	16	b2219	419
	b2220	19	b2220	335
	b2221	1	b2221	75
	b2222	2	b2222	83
	b2223	3	b2223	86
	b2224	1	b2224	78
	b2225	4	b2225	58
	b2229	1	b2229	30
	b2230	3	b2230	72
	b2231	223	b2231	3717
	b2232	10	b2232	124
	b2233	19	b2233	317
	b2234	50	b2234	1012
	b2235	53	b2235	552
	b2236	3	b2236	20
	b2237	7	b2237	150
	b2239	19	b2239	5706
	b2240	62	b2240	865
	b2241	3	b2241	167
	b2242	4	b2242	58
	b2243	2	b2243	114
	b2244	6	b2244	79
	b2245	2	b2245	91
	b2246	2	b2246	130
	b2247	13	b2247	287
	b2248	1	b2248	66
	b2249	42	b2249	326
	b2250	4	b2250	69
	b2251	2	b2251	82
	b2253	5	b2253	53
	b2254	2	b2254	62
	b2255	7	b2255	176
	b2256	3	b2256	23
	b2257	3	b2257	100
	b2258	1	b2258	15
	b2259	5	b2259	98
	b2260	24	b2260	559
	b2261	47	b2261	719
	b2262	93	b2262	1329
	b2263	42	b2263	588
	b2264	36	b2264	407
	b2265	17	b2265	324
	b2266	49	b2266	772
	b2267	21	b2267	206
	b2268	5	b2268	137
	b2269	8	b2269	313
	b2270	1	b2270	153
	b2272	1	b2272	84
	b2275	2	b2275	50
	b2276	256	b2276	5306
	b2277	359	b2277	5191
	b2278	595	b2278	8115
	b2279	52	b2279	1156
	b2280	205	b2280	2656
	b2281	170	b2281	2130
	b2282	220	b2282	3174
	b2283	505	b2283	7465
	b2284	242	b2284	3253
	b2285	100	b2285	1434
	b2286	325	b2286	4158
	b2287	105	b2287	1619
	b2288	131	b2288	2008
	b2289	20	b2289	428
	b2290	22	b2290	410
	b2291	8	b2291	163
	b2292	46	b2292	603
	b2293	43	b2293	388
	b2294	52	b2294	736
	b2295	8	b2295	118
	b2296	256	b2296	3004
	b2297	360	b2297	6303
	b2298	5	b2298	269
	b2299	13	b2299	306
	b2300	26	b2300	187
	b2301	5	b2301	121
	b2302	7	b2302	118
	b2303	41	b2303	365
	b2304	35	b2304	642
	b2305	1	b2305	60
	b2306	3	b2306	61
	b2307	3	b2307	37
	b2308	2	b2308	138
	b2309	20	b2309	444
	b2310	2	b2310	130
	b2311	1	b2311	44
	b2312	8	b2312	192
	b2313	11	b2313	146
	b2314	11	b2314	241
	b2315	27	b2315	318
	b2316	65	b2316	1037
	b2317	20	b2317	254
	b2318	16	b2318	192
	b2319	36	b2319	302
	b2320	38	b2320	525
	b2321	12	b2321	180
	b2322	5	b2322	61
	b2323	593	b2323	7861
	b2324	11	b2324	332
	b2325	1	b2325	40
	b2326	25	b2326	541
	b2327	10	b2327	76
	b2328	13	b2328	221
	b2329	16	b2329	243
	b2330	29	b2330	634
	b2331	18	b2331	222
	b2332	10	b2332	134
	b2333	2	b2333	36
	b2335	1	b2335	21
	b2336	5	b2336	32
	b2340	5	b2340	102
	b2341	23	b2341	211
	b2342	9	b2342	144
	b2343	110	b2343	1733
	b2344	32	b2344	582
	b2345	1	b2345	213
	b2346	20	b2346	283
	b2347	6	b2347	139
	b2349	4	b2349	175
	b2350	3	b2350	92
	b2351	14	b2351	355
	b2352	18	b2352	515
	b2359	1	b2359	22
	b2360	1	b2360	47
	b2364	1	b2364	103
	b2365	4	b2365	114
	b2366	13	b2366	290
	b2367	2	b2367	83
	b2368	4	b2368	91
	b2369	11	b2369	298
	b2370	20	b2370	551
	b2372	3	b2372	88
	b2373	3	b2373	106
	b2374	2	b2374	119
	b2377	39	b2377	479
	b2378	13	b2378	437
	b2379	29	b2379	547
	b2380	17	b2380	165
	b2381	11	b2381	111
	b2382	11	b2382	42
	b2383	10	b2383	239
	b2384	2	b2384	82
	b2386	1	b2386	81
	b2388	73	b2388	772
	b2389	12	b2389	134
	b2392	3	b2392	120
[truncated: 1,792 more rows]

## Sheet: Figure 1E
Correlation analysis between libraries	scRNA-seqΔΔ vs Bulk RNA-seq					Fig 1E. Pearson correlation coefficient
	RiboD-PETRI 0427-3		Bulk RNA-seq 1209-A			sample estimates: cor=0.84
	ID	UMI	ID	reads		p-value < 2.2e-16
	b0001	2	b0001	123
	b0002	155	b0002	577
	b0003	35	b0003	975
	b0004	95	b0004	1450
	b0005	12	b0005	142
	b0006	161	b0006	1004
	b0007	31	b0007	1406
	b0008	1274	b0008	23680
	b0009	27	b0009	1112
	b0010	7	b0010	293
	b0013	1	b0013	27
	b0014	2243	b0014	7074
	b0015	116	b0015	1095
	b0016	31	b0016	520
	b0019	63	b0019	791
	b0020	19	b0020	584
	b0021	3	b0021	94
	b0023	27	b0023	1504
	b0025	109	b0025	3057
	b0026	683	b0026	9640
	b0027	31	b0027	547
	b0028	38	b0028	565
	b0029	45	b0029	921
	b0030	418	b0030	12189
	b0031	74	b0031	1774
	b0032	12	b0032	187
	b0033	60	b0033	524
	b0034	19	b0034	1073
	b0035	1	b0035	112
	b0036	3	b0036	37
	b0037	6	b0037	238
	b0038	25	b0038	242
	b0039	13	b0039	349
	b0040	5	b0040	42
	b0041	2	b0041	33
	b0042	3	b0042	32
	b0043	9	b0043	33
	b0045	5	b0045	27
	b0046	16	b0046	139
	b0047	27	b0047	397
	b0048	4	b0048	486
	b0049	53	b0049	1079
	b0050	31	b0050	627
	b0051	72	b0051	3290
	b0052	36	b0052	1933
	b0053	217	b0053	5232
	b0054	360	b0054	10280
	b0055	17	b0055	793
	b0058	13	b0058	235
	b0059	66	b0059	972
	b0060	32	b0060	1258
	b0061	4	b0061	294
	b0062	30	b0062	657
	b0063	28	b0063	284
	b0064	38	b0064	728
	b0065	7	b0065	437
	b0066	11	b0066	132
	b0067	10	b0067	92
	b0068	12	b0068	351
	b0069	29	b0069	799
	b0070	19	b0070	337
	b0071	19	b0071	129
	b0072	19	b0072	188
	b0073	9	b0073	126
	b0074	3	b0074	213
	b0076	7	b0076	51
	b0077	43	b0077	451
	b0078	2	b0078	55
	b0080	117	b0080	5574
	b0081	44	b0081	680
	b0082	36	b0082	2873
	b0083	23	b0083	512
	b0084	50	b0084	2370
	b0085	86	b0085	4960
	b0086	163	b0086	3582
	b0087	118	b0087	1648
	b0088	114	b0088	3201
	b0089	48	b0089	2048
	b0090	79	b0090	2226
	b0091	125	b0091	5191
	b0092	91	b0092	3301
	b0093	79	b0093	2414
	b0094	223	b0094	4772
	b0095	956	b0095	20792
	b0096	508	b0096	15106
	b0097	45	b0097	2791
	b0098	784	b0098	10592
	b0099	2	b0099	85
	b0101	5	b0101	339
	b0102	16	b0102	946
	b0103	5	b0103	723
	b0104	153	b0104	926
	b0106	8	b0106	111
	b0107	6	b0107	279
	b0108	1	b0108	7
	b0109	25	b0109	986
	b0110	118	b0110	1852
	b0111	56	b0111	927
	b0112	21	b0112	853
	b0113	34	b0113	2238
	b0114	2646	b0114	38680
	b0115	1140	b0115	28619
	b0116	1515	b0116	52651
	b0117	5	b0117	215
	b0118	2729	b0118	36446
	b0119	73	b0119	123
	b0120	55	b0120	944
	b0121	87	b0121	1402
	b0122	2	b0122	749
	b0123	25	b0123	831
	b0124	30	b0124	696
	b0125	82	b0125	2147
	b0126	66	b0126	3096
	b0127	76	b0127	1450
	b0128	32	b0128	721
	b0129	81	b0129	920
	b0130	9	b0130	716
	b0131	29	b0131	1388
	b0132	7	b0132	84
	b0133	108	b0133	2161
	b0134	102	b0134	2241
	b0139	2	b0139	16
	b0140	4	b0140	3
	b0143	41	b0143	2267
	b0144	6	b0144	680
	b0145	177	b0145	4217
	b0146	223	b0146	7034
	b0147	9	b0147	446
	b0148	45	b0148	1492
	b0149	90	b0149	2465
	b0150	18	b0150	634
	b0151	17	b0151	153
	b0152	2	b0152	132
	b0153	9	b0153	241
	b0154	186	b0154	2988
	b0155	54	b0155	1661
	b0156	23	b0156	698
	b0157	8	b0157	83
	b0158	7	b0158	530
	b0159	165	b0159	4436
	b0160	19	b0160	758
	b0161	161	b0161	1293
	b0162	94	b0162	4535
	b0163	39	b0163	3660
	b0164	9	b0164	167
	b0166	282	b0166	7953
	b0167	61	b0167	940
	b0168	101	b0168	2545
	b0169	928	b0169	19132
	b0170	639	b0170	6082
	b0171	103	b0171	882
	b0172	230	b0172	6379
	b0173	25	b0173	1798
	b0174	43	b0174	3090
	b0175	76	b0175	1040
	b0176	103	b0176	5553
	b0177	560	b0177	10353
	b0178	217	b0178	4572
	b0179	171	b0179	7250
	b0180	93	b0180	3057
	b0181	88	b0181	2729
	b0182	48	b0182	1650
	b0183	18	b0183	488
	b0184	76	b0184	3920
	b0185	219	b0185	3226
	b0186	146	b0186	2413
	b0187	7	b0187	595
	b0188	28	b0188	1121
	b0189	28	b0189	400
	b0190	42	b0190	1062
	b0191	21	b0191	424
	b0192	36	b0192	1493
	b0193	1	b0193	161
	b0194	197	b0194	3672
	b0195	29	b0195	343
	b0196	60	b0196	699
	b0197	92	b0197	1708
	b0198	21	b0198	414
	b0199	18	b0199	614
	b0200	42	b0200	2305
	b0207	19	b0207	207
	b0208	20	b0208	524
	b0209	56	b0209	3556
	b0210	16	b0210	379
	b0211	56	b0211	2648
	b0212	51	b0212	1694
	b0213	5	b0213	728
	b0214	23	b0214	580
	b0215	46	b0215	977
	b0217	8	b0217	24
	b0219	13	b0219	774
	b0220	63	b0220	418
	b0221	22	b0221	222
	b0222	120	b0222	2373
	b0223	21	b0223	1523
	b0224	17	b0224	1040
	b0225	1	b0225	191
	b0226	48	b0226	644
	b0227	3	b0227	71
	b0228	4	b0228	449
	b0231	10	b0231	329
	b0232	4	b0232	54
	b0233	4	b0233	27
	b0237	1051	b0237	21563
	b0238	16	b0238	1363
	b0239	59	b0239	1457
	b0242	46	b0242	3778
	b0243	133	b0243	2436
	b0245	6	b0245	57
	b0247	1	b0247	82
	b0248	15	b0248	206
	b0249	4	b0249	51
	b0250	7	b0250	625
	b0251	7	b0251	67
	b0252	20	b0252	129
	b0253	1	b0253	268
	b0254	10	b0254	173
	b0259	9	b0259	2116
	b0260	5	b0260	78
	b0261	23	b0261	1678
	b0262	4	b0262	162
	b0264	3	b0264	160
	b0267	7	b0267	18
	b0268	16	b0268	374
	b0269	11	b0269	477
	b0270	11	b0270	90
	b0271	26	b0271	240
	b0272	13	b0272	259
	b0273	17	b0273	231
	b0274	6	b0274	183
	b0278	1	b0278	16
	b0279	3	b0279	10
	b0281	44	b0281	512
	b0283	8	b0283	67
	b0284	17	b0284	148
	b0285	5	b0285	115
	b0286	3	b0286	73
	b0287	20	b0287	679
	b0289	6	b0289	147
	b0290	20	b0290	234
	b0291	11	b0291	214
	b0292	4	b0292	26
	b0293	6	b0293	122
	b0298	5	b0298	100
	b0299	17	b0299	777
	b0301	3	b0301	7
	b0304	7	b0304	381
	b0306	199	b0306	5401
	b0307	327	b0307	7304
	b0308	75	b0308	2718
	b0311	12	b0311	174
	b0312	37	b0312	330
	b0313	7	b0313	121
	b0314	15	b0314	180
	b0315	4	b0315	91
	b0316	9	b0316	276
	b0317	5	b0317	37
	b0319	1	b0319	23
	b0320	7	b0320	67
	b0321	7	b0321	160
	b0323	4	b0323	65
	b0324	28	b0324	457
	b0325	142	b0325	1651
	b0327	1	b0327	18
	b0328	33	b0328	913
	b0329	154	b0329	3287
	b0330	3	b0330	68
	b0331	4	b0331	37
	b0333	10	b0333	30
	b0334	11	b0334	38
	b0335	6	b0335	89
	b0336	12	b0336	140
	b0337	27	b0337	1016
	b0338	9	b0338	151
	b0339	8	b0339	46
	b0340	1	b0340	57
	b0341	6	b0341	71
	b0342	3	b0342	82
	b0343	19	b0343	215
	b0344	38	b0344	1158
	b0345	53	b0345	697
	b0346	11	b0346	149
	b0349	1	b0349	32
	b0350	6	b0350	29
	b0351	3	b0351	47
	b0352	13	b0352	54
	b0353	6	b0353	108
	b0354	24	b0354	722
	b0355	16	b0355	325
	b0356	87	b0356	899
	b0357	26	b0357	211
	b0363	5	b0363	11
	b0366	1	b0366	30
	b0367	4	b0367	12
	b0369	124	b0369	4158
	b0375	3	b0375	9
	b0376	26	b0376	930
	b0377	9	b0377	398
	b0378	15	b0378	485
	b0380	9	b0380	301
	b0381	103	b0381	2831
	b0382	12	b0382	233
	b0383	15	b0383	443
	b0384	9	b0384	363
	b0385	6	b0385	87
	b0386	54	b0386	1324
	b0387	13	b0387	676
	b0388	3	b0388	905
	b0389	16	b0389	329
	b0390	1	b0390	178
	b0391	50	b0391	1942
	b0393	31	b0393	933
	b0394	99	b0394	1774
	b0396	6	b0396	288
	b0397	96	b0397	1413
	b0398	39	b0398	780
	b0399	8	b0399	358
	b0400	7	b0400	303
	b0401	72	b0401	1747
	b0402	19	b0402	1200
	b0403	22	b0403	762
	b0404	18	b0404	208
	b0405	22	b0405	865
	b0406	159	b0406	1896
	b0407	135	b0407	3118
	b0408	185	b0408	7449
	b0409	135	b0409	2534
	b0410	26	b0410	786
	b0411	422	b0411	5682
	b0413	23	b0413	740
	b0414	58	b0414	2123
	b0415	64	b0415	2351
	b0416	49	b0416	2209
	b0417	28	b0417	936
	b0418	48	b0418	1282
	b0419	118	b0419	3930
	b0420	140	b0420	3438
	b0421	57	b0421	2457
	b0422	40	b0422	1679
	b0423	30	b0423	1268
	b0424	18	b0424	899
	b0425	59	b0425	1229
	b0426	130	b0426	3291
	b0427	12	b0427	407
	b0428	21	b0428	828
	b0429	8	b0429	227
	b0430	14	b0430	282
	b0431	85	b0431	1111
	b0432	19	b0432	839
	b0433	14	b0433	764
	b0434	18	b0434	1976
	b0435	97	b0435	911
	b0436	772	b0436	9525
	b0437	168	b0437	6129
	b0438	313	b0438	10711
	b0439	422	b0439	6927
	b0440	706	b0440	5710
	b0441	223	b0441	7870
	b0442	4	b0442	325
	b0443	2	b0443	57
	b0444	42	b0444	1259
	b0445	41	b0445	1252
	b0446	13	b0446	592
	b0447	10	b0447	219
	b0448	7	b0448	483
	b0449	15	b0449	319
	b0451	5	b0451	161
	b0452	21	b0452	675
	b0453	48	b0453	1765
	b0454	4	b0454	457
	b0456	2	b0456	53
	b0457	14	b0457	422
	b0458	21	b0458	413
	b0459	4	b0459	391
	b0460	18	b0460	451
	b0461	27	b0461	463
	b0462	549	b0462	5083
	b0463	148	b0463	3740
	b0464	26	b0464	952
	b0465	64	b0465	1777
	b0466	2	b0466	17
	b0467	12	b0467	499
	b0468	3	b0468	254
	b0469	16	b0469	575
	b0470	86	b0470	3369
	b0471	119	b0471	993
	b0472	88	b0472	2208
	b0473	699	b0473	2351
	b0474	106	b0474	4383
	b0475	35	b0475	700
	b0476	31	b0476	1209
	b0477	26	b0477	1327
	b0478	66	b0478	1405
	b0479	34	b0479	585
	b0480	238	b0480	3484
	b0481	5	b0481	420
	b0482	20	b0482	718
	b0483	16	b0483	250
	b0484	80	b0484	3587
	b0485	113	b0485	1142
	b0486	49	b0486	453
	b0487	24	b0487	597
	b0488	4	b0488	361
	b0489	39	b0489	1285
	b0490	10	b0490	185
	b0491	12	b0491	348
	b0492	64	b0492	2596
	b0493	18	b0493	1198
	b0494	19	b0494	847
	b0495	14	b0495	318
	b0496	22	b0496	558
	b0497	41	b0497	559
	b0503	17	b0503	794
	b0504	7	b0504	88
	b0505	3	b0505	123
	b0506	98	b0506	2725
	b0507	16	b0507	53
	b0508	17	b0508	3
	b0509	10	b0509	45
	b0511	21	b0511	8
	b0512	19	b0512	140
	b0513	7	b0513	43
	b0514	4	b0514	87
	b0515	33	b0515	299
	b0516	17	b0516	250
	b0517	3	b0517	73
	b0520	1	b0520	48
	b0521	4	b0521	44
	b0522	12	b0522	336
	b0524	6	b0524	671
	b0525	210	b0525	5179
	b0526	32	b0526	1692
	b0529	69	b0529	1978
	b0532	199	b0532	50
	b0537	11	b0537	569
	b0543	4	b0543	147
	b0544	10	b0544	10
	b0545	1	b0545	64
	b0546	12	b0546	138
	b0551	1	b0551	6
	b0557	41	b0557	51
	b0559	2	b0559	359
	b0564	1	b0564	22
	b0565	261	b0565	2368
	b0566	8	b0566	49
	b0567	4	b0567	92
	b0568	33	b0568	670
	b0569	15	b0569	371
	b0570	6	b0570	168
	b0571	1	b0571	245
	b0572	6	b0572	22
	b0573	3	b0573	19
	b0574	11	b0574	31
	b0575	19	b0575	172
	b0576	17	b0576	269
	b0577	45	b0577	911
	b0578	90	b0578	1682
	b0579	21	b0579	169
	b0580	1	b0580	42
	b0581	24	b0581	783
	b0582	29	b0582	380
	b0584	10	b0584	153
	b0585	4	b0585	17
	b0586	16	b0586	238
	b0587	8	b0587	5
	b0588	2	b0588	3
	b0589	1	b0589	59
	b0590	5	b0590	34
	b0591	4	b0591	14
	b0592	8	b0592	53
	b0593	5	b0593	8
	b0594	7	b0594	44
	b0596	4	b0596	132
	b0597	2	b0597	19
	b0598	152	b0598	2411
	b0599	17	b0599	289
	b0600	12	b0600	158
	b0601	8	b0601	106
	b0602	1	b0602	42
	b0604	57	b0604	514
	b0605	2507	b0605	42364
	b0606	193	b0606	5522
	b0607	261	b0607	2726
	b0608	4	b0608	196
	b0610	10	b0610	995
	b0611	50	b0611	1663
	b0612	6	b0612	75
	b0613	4	b0613	19
	b0615	7	b0615	183
	b0616	8	b0616	157
	b0618	9	b0618	71
	b0619	17	b0619	335
	b0620	14	b0620	1947
	b0621	291	b0621	14214
	b0622	1	b0622	192
	b0623	402	b0623	10030
	b0624	13	b0624	258
	b0627	41	b0627	407
	b0628	113	b0628	4178
	b0629	2	b0629	73
	b0630	28	b0630	584
	b0631	18	b0631	462
	b0632	60	b0632	2172
	b0633	73	b0633	2140
	b0634	46	b0634	562
	b0635	18	b0635	1251
	b0636	17	b0636	549
	b0637	16	b0637	797
	b0638	8	b0638	194
	b0639	9	b0639	674
	b0640	24	b0640	1018
	b0641	51	b0641	1864
	b0642	481	b0642	10055
	b0643	110	b0643	4922
	b0644	10	b0644	487
	b0646	3	b0646	15
	b0648	5	b0648	3
	b0649	4	b0649	90
	b0650	7	b0650	309
	b0651	186	b0651	7028
	b0652	15	b0652	245
	b0653	5	b0653	162
	b0654	9	b0654	234
	b0655	28	b0655	1250
	b0656	9	b0656	2259
	b0657	47	b0657	1555
	b0658	161	b0658	3678
	b0659	57	b0659	1014
	b0660	95	b0660	3378
	b0661	34	b0661	1002
	b0662	124	b0662	2624
	b0674	73	b0674	1860
	b0675	58	b0675	1680
	b0676	91	b0676	3112
	b0677	134	b0677	3248
	b0678	203	b0678	3873
	b0679	554	b0679	12624
	b0680	222	b0680	5472
	b0681	15	b0681	616
	b0683	68	b0683	5645
	b0684	87	b0684	3957
	b0685	1	b0685	402
	b0686	29	b0686	694
	b0687	57	b0687	5309
	b0688	255	b0688	10055
	b0692	15	b0692	121
	b0693	14	b0693	73
	b0694	3	b0694	135
	b0695	54	b0695	721
	b0696	15	b0696	69
	b0697	24	b0697	145
	b0698	17	b0698	29
	b0699	28	b0699	173
	b0700	30	b0700	721
	b0704	10	b0704	14
	b0706	2	b0706	5
	b0707	32	b0707	1192
	b0708	22	b0708	1594
	b0709	10	b0709	379
	b0710	102	b0710	1546
	b0711	59	b0711	1177
	b0712	62	b0712	1687
	b0713	17	b0713	750
	b0714	15	b0714	551
	b0715	25	b0715	768
	b0716	3	b0716	80
	b0717	9	b0717	12
	b0718	8	b0718	36
	b0720	1264	b0720	19922
	b0721	39	b0721	663
	b0722	30	b0722	275
	b0723	392	b0723	3035
	b0724	128	b0724	1776
	b0726	456	b0726	8411
	b0727	383	b0727	10959
	b0728	363	b0728	10001
	b0729	177	b0729	8923
	b0730	21	b0730	293
	b0731	9	b0731	36
	b0732	6	b0732	557
	b0733	5094	b0733	35156
	b0734	3963	b0734	30952
	b0735	83	b0735	921
	b0736	5	b0736	359
	b0737	7	b0737	886
	b0738	14	b0738	394
	b0739	52	b0739	691
	b0740	415	b0740	7922
	b0741	525	b0741	12105
	b0742	95	b0742	3664
	b0750	8	b0750	373
	b0751	31	b0751	413
	b0752	20	b0752	581
	b0754	117	b0754	5086
	b0755	502	b0755	6680
	b0756	237	b0756	5843
	b0757	328	b0757	4740
	b0758	165	b0758	3265
	b0759	235	b0759	5264
	b0760	11	b0760	650
	b0761	22	b0761	1191
	b0762	1	b0762	65
	b0763	32	b0763	634
	b0764	25	b0764	199
	b0765	20	b0765	411
	b0766	35	b0766	530
	b0767	229	b0767	6657
	b0768	5	b0768	74
	b0770	6	b0770	16
	b0771	17	b0771	152
	b0772	52	b0772	1040
	b0773	30	b0773	1045
	b0774	1	b0774	106
	b0775	9	b0775	68
	b0776	13	b0776	42
	b0777	8	b0777	35
	b0778	1	b0778	18
	b0779	94	b0779	2387
	b0780	18	b0780	843
	b0781	43	b0781	2011
	b0782	61	b0782	351
	b0783	59	b0783	183
	b0784	17	b0784	57
	b0785	39	b0785	208
	b0786	119	b0786	2984
	b0789	10	b0789	295
	b0790	14	b0790	283
	b0791	20	b0791	797
	b0792	9	b0792	687
	b0793	26	b0793	784
	b0794	70	b0794	3061
	b0795	52	b0795	3085
	b0796	27	b0796	753
	b0797	39	b0797	1858
	b0798	20	b0798	1064
	b0799	15	b0799	1557
	b0800	84	b0800	2342
	b0801	41	b0801	1161
	b0802	3	b0802	264
	b0804	6	b0804	120
	b0805	9	b0805	180
	b0806	10	b0806	388
	b0807	22	b0807	495
	b0808	27	b0808	487
	b0809	35	b0809	453
	b0810	45	b0810	461
	b0811	166	b0811	2458
	b0812	1199	b0812	26430
	b0813	19	b0813	184
	b0814	372	b0814	13022
	b0815	6	b0815	183
	b0817	12	b0817	231
	b0818	17	b0818	288
	b0819	35	b0819	1804
	b0820	71	b0820	1986
	b0821	5	b0821	123
	b0822	15	b0822	367
	b0823	37	b0823	903
	b0824	1	b0824	105
	b0825	12	b0825	532
	b0826	38	b0826	798
	b0827	118	b0827	2681
	b0828	68	b0828	1478
	b0829	62	b0829	1540
	b0830	107	b0830	1047
	b0831	14	b0831	427
	b0832	11	b0832	322
	b0833	17	b0833	73
	b0834	3	b0834	14
	b0835	18	b0835	643
	b0836	225	b0836	3994
	b0837	25	b0837	414
	b0838	76	b0838	1677
	b0839	73	b0839	2571
	b0840	30	b0840	942
	b0841	3	b0841	212
	b0842	10	b0842	206
	b0844	21	b0844	239
	b0845	17	b0845	172
	b0846	8	b0846	179
	b0847	30	b0847	1458
	b0848	10	b0848	393
	b0849	4	b0849	10
	b0850	18	b0850	513
	b0851	46	b0851	1280
	b0852	21	b0852	764
	b0853	35	b0853	2979
	b0854	15	b0854	74
	b0856	3	b0856	15
	b0857	3	b0857	33
	b0858	1	b0858	70
	b0859	6	b0859	272
	b0860	17	b0860	281
	b0861	51	b0861	1481
	b0862	59	b0862	859
	b0863	263	b0863	5665
	b0864	66	b0864	2511
	b0865	135	b0865	4359
	b0866	35	b0866	1240
	b0867	26	b0867	1818
	b0868	20	b0868	1124
	b0869	58	b0869	1346
	b0870	67	b0870	2023
	b0871	140	b0871	4511
	b0872	16	b0872	800
	b0873	99	b0873	699
	b0874	11	b0874	117
	b0875	3	b0875	93
	b0876	74	b0876	1587
	b0877	104	b0877	2983
	b0878	23	b0878	1338
	b0879	28	b0879	1142
	b0880	76	b0880	4003
	b0881	65	b0881	1149
	b0882	606	b0882	24730
	b0884	56	b0884	1971
	b0885	5	b0885	240
	b0886	50	b0886	1083
	b0887	48	b0887	1322
	b0888	62	b0888	1774
	b0889	100	b0889	2536
	b0890	221	b0890	5862
	b0891	60	b0891	2109
	b0892	18	b0892	1158
	b0893	1026	b0893	20456
	b0894	1416	b0894	47243
	b0895	379	b0895	8150
	b0896	389	b0896	6925
	b0897	130	b0897	1460
	b0898	5	b0898	156
	b0899	14	b0899	150
	b0900	7	b0900	55
	b0901	4	b0901	26
	b0902	67	b0902	1904
	b0903	24535	b0903	181345
	b0904	577	b0904	12148
	b0905	61	b0905	680
	b0906	28	b0906	342
	b0907	107	b0907	3442
	b0908	40	b0908	936
	b0909	2	b0909	74
	b0910	79	b0910	2184
	b0911	2488	b0911	28480
	b0912	151	b0912	2280
	b0913	12	b0913	266
	b0914	96	b0914	1938
	b0915	13	b0915	332
	b0916	12	b0916	189
	b0917	31	b0917	220
	b0918	93	b0918	1841
	b0919	240	b0919	8333
	b0920	15	b0920	372
	b0921	45	b0921	1317
	b0922	56	b0922	1709
	b0923	37	b0923	1460
	b0924	373	b0924	6175
	b0925	82	b0925	3749
	b0926	113	b0926	3619
	b0927	79	b0927	3194
	b0928	724	b0928	9356
	b0929	4653	b0929	35132
	b0930	161	b0930	4744
	b0931	67	b0931	1514
	b0932	654	b0932	10904
	b0933	1	b0933	64
	b0934	3	b0934	27
	b0935	1	b0935	35
	b0936	9	b0936	33
	b0937	2	b0937	27
	b0938	1	b0938	33
	b0940	6	b0940	84
	b0941	5	b0941	129
	b0943	3	b0943	41
	b0944	7	b0944	135
	b0945	28	b0945	420
	b0946	28	b0946	977
	b0947	55	b0947	1286
	b0948	64	b0948	1269
	b0949	115	b0949	1091
	b0950	13	b0950	340
	b0951	41	b0951	586
	b0952	13	b0952	304
	b0953	367	b0953	3632
	b0954	141	b0954	4470
	b0955	106	b0955	2914
	b0956	44	b0956	515
	b0957	8071	b0957	219157
	b0958	38	b0958	784
	b0959	28	b0959	388
	b0960	27	b0960	634
	b0961	16	b0961	134
	b0962	65	b0962	2042
	b0963	101	b0963	5349
	b0964	11	b0964	141
	b0965	43	b0965	769
	b0966	10	b0966	1025
	b0967	31	b0967	615
	b0968	6	b0968	94
	b0969	14	b0969	250
	b0970	407	b0970	7985
	b0972	2	b0972	445
	b0973	27	b0973	504
	b0974	1	b0974	138
	b0975	3	b0975	128
	b0977	2	b0977	117
	b0978	32	b0978	194
	b0979	17	b0979	91
	b0980	21	b0980	286
	b0981	13	b0981	463
	b0983	4	b0983	57
	b0984	4	b0984	94
	b0986	4	b0986	16
	b0987	4	b0987	70
	b0988	3	b0988	1408
	b0992	50	b0992	711
	b0993	27	b0993	503
	b0994	15	b0994	434
	b0995	10	b0995	180
	b0996	7	b0996	52
	b0997	12	b0997	155
	b0999	17	b0999	344
	b1000	88	b1000	3377
	b1002	672	b1002	29216
	b1003	89	b1003	2225
	b1004	1109	b1004	22209
	b1006	10	b1006	156
	b1008	3	b1008	28
	b1009	1	b1009	18
	b1012	6	b1012	21
	b1013	16	b1013	316
	b1014	86	b1014	339
	b1015	23	b1015	225
	b1018	1	b1018	40
	b1019	2	b1019	72
	b1020	3	b1020	23
	b1022	8	b1022	51
	b1023	8	b1023	76
	b1024	23	b1024	559
	b1025	9	b1025	152
	b1026	18	b1026	698
	b1027	5	b1027	97
	b1033	65	b1033	1705
	b1034	72	b1034	1893
	b1035	20	b1035	1299
	b1036	13	b1036	402
	b1037	3	b1037	81
	b1041	7	b1041	7
	b1042	2	b1042	48
	b1045	28	b1045	945
	b1046	23	b1046	898
	b1048	241	b1048	3562
	b1049	251	b1049	3524
	b1050	13	b1050	547
	b1051	60	b1051	339
	b1053	11	b1053	725
	b1054	28	b1054	1272
	b1055	1	b1055	257
	b1056	6	b1056	82
	b1057	4	b1057	15
	b1058	1	b1058	4
	b1059	65	b1059	1409
	b1060	25	b1060	2299
	b1061	2	b1061	144
	b1062	20	b1062	769
	b1063	35	b1063	1068
	b1064	336	b1064	5857
	b1065	7	b1065	421
	b1066	52	b1066	1699
	b1067	58	b1067	1182
	b1068	48	b1068	1196
	b1069	30	b1069	341
	b1070	4	b1070	72
	b1071	7	b1071	123
	b1072	10	b1072	443
	b1073	37	b1073	691
	b1074	32	b1074	451
	b1075	34	b1075	940
	b1076	129	b1076	2098
	b1077	14	b1077	828
	b1078	25	b1078	1572
	b1079	10	b1079	377
	b1080	8	b1080	551
	b1081	4	b1081	267
	b1082	11	b1082	517
	b1083	28	b1083	261
	b1084	577	b1084	21985
	b1085	23	b1085	2576
	b1086	23	b1086	800
	b1087	46	b1087	752
	b1088	311	b1088	9928
	b1089	211	b1089	3459
	b1090	74	b1090	3294
	b1091	215	b1091	3607
	b1092	389	b1092	5035
	b1093	828	b1093	19732
	b1094	459	b1094	18545
	b1095	191	b1095	10732
	b1096	4	b1096	530
	b1097	25	b1097	454
	b1098	49	b1098	796
	b1099	56	b1099	801
	b1100	41	b1100	1018
	b1101	368	b1101	16406
	b1102	15	b1102	240
	b1103	151	b1103	1996
	b1104	23	b1104	1546
	b1105	109	b1105	2766
	b1106	25	b1106	1049
	b1107	222	b1107	1969
	b1108	183	b1108	8607
	b1109	178	b1109	2510
	b1110	2	b1110	111
	b1111	27	b1111	518
	b1112	1	b1112	46
	b1113	23	b1113	363
	b1114	95	b1114	3304
	b1115	6	b1115	72
	b1116	31	b1116	1952
	b1117	20	b1117	701
	b1118	72	b1118	1594
	b1119	33	b1119	2170
	b1120	64	b1120	1213
	b1123	292	b1123	1020
	b1124	67	b1124	199
	b1125	17	b1125	193
	b1126	31	b1126	1070
	b1127	618	b1127	10450
	b1128	107	b1128	3172
	b1129	58	b1129	2182
	b1130	222	b1130	2866
	b1131	65	b1131	741
	b1132	17	b1132	809
	b1133	98	b1133	2119
	b1134	22	b1134	300
	b1135	16	b1135	546
	b1136	1399	b1136	22165
	b1137	10	b1137	202
	b1138	42	b1138	145
	b1139	31	b1139	419
	b1140	6	b1140	41
	b1141	1	b1141	21
	b1143	4	b1143	187
	b1144	3	b1144	87
	b1145	14	b1145	274
	b1146	8	b1146	52
	b1148	1	b1148	7
	b1159	4	b1159	102
	b1161	4	b1161	11
	b1162	13	b1162	591
	b1163	2	b1163	109
	b1174	23	b1174	798
	b1175	209	b1175	5518
	b1176	63	b1176	4074
	b1177	7	b1177	617
	b1178	23	b1178	533
	b1179	27	b1179	1500
	b1180	42	b1180	1027
	b1181	25	b1181	371
	b1182	8	b1182	197
	b1184	6	b1184	139
	b1185	7	b1185	572
	b1186	64	b1186	1794
	b1187	45	b1187	2458
	b1188	108	b1188	1552
	b1189	37	b1189	986
	b1190	30	b1190	552
	b1191	51	b1191	1549
	b1192	17	b1192	887
	b1193	12	b1193	294
	b1195	2	b1195	37
	b1197	101	b1197	2945
	b1198	28	b1198	839
	b1199	9	b1199	313
	b1200	42	b1200	792
	b1201	24	b1201	431
	b1202	14	b1202	428
	b1203	90	b1203	1623
	b1204	20	b1204	557
	b1205	477	b1205	5311
	b1206	17	b1206	478
	b1207	203	b1207	6338
	b1208	139	b1208	3344
	b1209	27	b1209	1557
	b1210	28	b1210	2430
	b1211	35	b1211	1659
	b1212	9	b1212	396
	b1213	5	b1213	65
	b1214	16	b1214	965
	b1215	261	b1215	3309
	b1216	24	b1216	496
	b1217	4	b1217	177
	b1218	14	b1218	439
	b1219	64	b1219	1477
	b1220	26	b1220	325
	b1221	127	b1221	761
	b1222	74	b1222	1262
	b1223	320	b1223	725
	b1224	1273	b1224	5648
	b1225	690	b1225	1820
	b1226	282	b1226	640
	b1227	383	b1227	385
	b1232	34	b1232	1505
	b1233	26	b1233	684
	b1234	35	b1234	2181
	b1235	22	b1235	2011
	b1236	208	b1236	2404
	b1237	1354	b1237	27676
	b1238	12	b1238	309
	b1241	7938	b1241	66047
	b1242	14	b1242	536
	b1243	1845	b1243	37169
	b1244	264	b1244	5010
	b1245	365	b1245	4615
	b1246	468	b1246	4651
	b1247	489	b1247	4503
	b1248	8	b1248	310
	b1249	33	b1249	1404
	b1250	30	b1250	522
	b1251	32	b1251	1312
	b1252	4	b1252	402
	b1253	2	b1253	142
	b1254	13	b1254	685
	b1255	9	b1255	795
	b1256	3346	b1256	76450
	b1257	22	b1257	977
	b1258	12	b1258	54
	b1259	1	b1259	5
	b1260	27	b1260	311
	b1261	17	b1261	537
	b1262	10	b1262	330
	b1263	8	b1263	113
	b1264	13	b1264	42
	b1266	31	b1266	1357
	b1267	63	b1267	2752
	b1268	12	b1268	354
	b1269	40	b1269	914
	b1270	24	b1270	578
	b1271	33	b1271	942
	b1272	65	b1272	1627
	b1273	45	b1273	1279
	b1274	167	b1274	3037
	b1275	36	b1275	1652
	b1276	327	b1276	8872
	b1277	27	b1277	2308
	b1278	36	b1278	719
	b1279	35	b1279	771
	b1280	46	b1280	1649
	b1281	12	b1281	403
	b1282	1	b1282	48
	b1283	4	b1283	460
	b1284	33	b1284	1315
	b1285	29	b1285	545
	b1286	112	b1286	1812
	b1287	9	b1287	217
	b1288	488	b1288	8969
	b1289	5	b1289	60
	b1290	14	b1290	478
	b1291	44	b1291	853
	b1292	26	b1292	286
	b1293	14	b1293	375
	b1294	45	b1294	2184
	b1296	1	b1296	63
	b1297	6	b1297	94
	b1298	7	b1298	67
	b1299	7	b1299	220
	b1300	6	b1300	67
	b1301	5	b1301	20
	b1302	14	b1302	111
	b1303	9	b1303	791
	b1304	44	b1304	870
	b1305	4	b1305	52
	b1306	15	b1306	54
	b1308	58	b1308	7773
	b1309	14	b1309	107
	b1310	3	b1310	56
	b1312	1	b1312	18
	b1313	6	b1313	89
	b1314	9	b1314	44
	b1315	12	b1315	112
	b1316	13	b1316	121
	b1319	10	b1319	6
	b1320	7	b1320	225
	b1321	15	b1321	382
	b1322	15	b1322	243
	b1323	88	b1323	3945
	b1324	483	b1324	8538
	b1325	13	b1325	950
	b1326	11	b1326	466
	b1327	9	b1327	125
	b1328	7	b1328	305
	b1329	77	b1329	1574
	b1330	26	b1330	225
	b1331	12	b1331	2076
	b1332	24	b1332	357
	b1333	476	b1333	13325
	b1334	153	b1334	3780
	b1335	9	b1335	365
	b1336	10	b1336	117
	b1337	10	b1337	129
	b1338	11	b1338	57
	b1339	10	b1339	376
	b1340	5	b1340	148
	b1341	44	b1341	1231
	b1342	27	b1342	1108
	b1343	16	b1343	403
	b1344	7	b1344	493
	b1345	17	b1345	53
	b1349	1	b1349	16
	b1350	13	b1350	77
	b1356	36	b1356	1529
	b1359	7	b1359	44
	b1363	28	b1363	180
	b1372	15	b1372	135
	b1373	6	b1373	26
	b1375	3	b1375	8
	b1376	387	b1376	3255
	b1377	111	b1377	9
	b1378	273	b1378	6692
	b1379	6	b1379	830
	b1380	135	b1380	1008
	b1381	55	b1381	837
	b1383	9	b1383	131
	b1384	9	b1384	77
	b1385	11	b1385	177
	b1386	12	b1386	158
	b1387	4	b1387	46
	b1388	2	b1388	21
	b1390	6	b1390	12
	b1391	4	b1391	26
	b1393	8	b1393	39
	b1394	6	b1394	20
	b1395	4	b1395	38
	b1398	4	b1398	168
	b1399	46	b1399	1016
	b1400	11	b1400	368
	b1406	76	b1406	1853
	b1407	6	b1407	110
	b1409	6	b1409	3
	b1410	6	b1410	71
	b1411	11	b1411	197
	b1412	19	b1412	546
	b1413	243	b1413	4672
	b1414	28	b1414	420
	b1415	108	b1415	1706
	b1418	79	b1418	751
	b1419	77	b1419	730
	b1421	2	b1421	181
	b1422	8	b1422	166
	b1423	62	b1423	1065
	b1424	60	b1424	1633
	b1426	167	b1426	3269
	b1427	64	b1427	1019
	b1428	17	b1428	147
	b1429	20	b1429	315
	b1430	30	b1430	643
	b1431	51	b1431	1241
	b1432	48	b1432	569
	b1433	42	b1433	616
	b1434	24	b1434	248
	b1435	11	b1435	935
	b1436	5	b1436	17
	b1438	11	b1438	238
	b1439	12	b1439	318
	b1440	33	b1440	1322
	b1441	5	b1441	435
	b1442	12	b1442	236
	b1443	18	b1443	593
	b1444	82	b1444	808
	b1446	29	b1446	267
	b1447	4	b1447	145
	b1448	21	b1448	530
	b1449	71	b1449	2419
	b1450	2	b1450	119
	b1451	4	b1451	116
	b1452	3	b1452	50
	b1453	10	b1453	76
	b1457	6	b1457	2
	b1460	1	b1460	10
	b1461	19	b1461	202
	b1462	11	b1462	218
	b1463	7	b1463	159
	b1464	23	b1464	736
	b1465	1	b1465	51
	b1466	2	b1466	44
	b1467	24	b1467	124
	b1468	34	b1468	518
	b1469	17	b1469	132
	b1473	22	b1473	422
	b1474	261	b1474	928
	b1475	37	b1475	207
	b1476	25	b1476	102
	b1477	8	b1477	520
	b1478	26	b1478	329
	b1479	308	b1479	6675
	b1480	62	b1480	2543
	b1482	61	b1482	1396
	b1483	5	b1483	138
	b1484	7	b1484	62
	b1485	4	b1485	52
	b1486	4	b1486	16
	b1487	8	b1487	96
	b1488	3	b1488	29
	b1489	16	b1489	99
	b1490	5	b1490	60
	b1491	12	b1491	289
	b1492	55	b1492	614
	b1493	254	b1493	920
	b1494	12	b1494	97
	b1495	21	b1495	30
	b1496	2	b1496	10
	b1497	6	b1497	567
	b1498	665	b1498	17282
	b1501	15	b1501	84
	b1502	1	b1502	2
	b1507	30	b1507	476
	b1508	9	b1508	166
	b1511	24	b1511	517
	b1512	43	b1512	620
	b1513	13	b1513	182
	b1514	5	b1514	66
	b1515	9	b1515	103
	b1516	8	b1516	333
	b1517	17	b1517	350
	b1518	5	b1518	194
	b1519	10	b1519	480
	b1520	6	b1520	183
	b1521	130	b1521	5517
	b1522	16	b1522	185
	b1523	2	b1523	314
	b1524	7	b1524	650
	b1525	30	b1525	700
	b1526	9	b1526	201
	b1527	6	b1527	10
	b1528	8	b1528	222
	b1529	14	b1529	627
	b1530	4	b1530	343
	b1531	7	b1531	218
	b1532	1	b1532	12
	b1533	19	b1533	255
	b1534	6	b1534	236
	b1535	23	b1535	119
	b1537	1	b1537	61
	b1538	221	b1538	2615
	b1539	218	b1539	8173
	b1540	20	b1540	1692
	b1541	126	b1541	444
	b1542	3	b1542	71
	b1580	2	b1580	17
	b1581	11	b1581	90
	b1582	5	b1582	109
	b1583	52	b1583	1406
	b1584	29	b1584	1138
	b1585	10	b1585	490
	b1586	8	b1586	352
	b1587	611	b1587	19615
	b1588	582	b1588	24445
	b1589	77	b1589	3733
	b1590	117	b1590	4951
	b1591	54	b1591	1940
	b1592	1	b1592	174
	b1593	102	b1593	2519
	b1594	219	b1594	3612
	b1595	15	b1595	235
	b1596	11	b1596	1441
	b1598	50	b1598	1230
	b1600	14	b1600	882
	b1601	23	b1601	383
	b1602	581	b1602	4864
	b1603	772	b1603	7257
	b1604	152	b1604	2621
	b1605	15	b1605	103
	b1606	11	b1606	314
	b1607	11	b1607	130
	b1608	43	b1608	1093
	b1609	30	b1609	767
	b1610	17	b1610	261
	b1611	42	b1611	1388
	b1612	242	b1612	3876
	b1613	100	b1613	2918
	b1614	323	b1614	9917
	b1615	5	b1615	4
	b1616	10	b1616	47
	b1617	39	b1617	226
	b1618	10	b1618	1087
	b1619	154	b1619	2504
	b1620	8	b1620	304
	b1621	86	b1621	795
	b1622	57	b1622	974
	b1623	161	b1623	3549
	b1624	37	b1624	1031
	b1626	12	b1626	250
	b1627	1	b1627	148
	b1628	1	b1628	128
	b1629	25	b1629	292
	b1630	18	b1630	106
	b1631	5	b1631	54
	b1632	7	b1632	61
	b1633	7	b1633	42
	b1634	150	b1634	1584
	b1635	50	b1635	1864
	b1636	23	b1636	1319
	b1637	141	b1637	5998
	b1638	50	b1638	2059
	b1639	6	b1639	199
	b1640	34	b1640	1585
	b1641	331	b1641	12225
	b1642	66	b1642	1507
	b1643	2	b1643	75
	b1644	10	b1644	155
	b1645	26	b1645	298
	b1646	52	b1646	1449
	b1647	109	b1647	6500
	b1649	9	b1649	174
	b1650	40	b1650	665
	b1651	155	b1651	2512
	b1652	19	b1652	646
	b1653	47	b1653	1324
	b1654	27	b1654	2634
	b1655	23	b1655	803
	b1656	1309	b1656	36114
	b1657	13	b1657	303
	b1658	23	b1658	1153
	b1659	12	b1659	180
	b1660	22	b1660	204
	b1661	156	b1661	6056
	b1662	41	b1662	2341
	b1663	21	b1663	774
	b1664	112	b1664	1651
	b1667	49	b1667	1762
	b1668	23	b1668	473
	b1669	16	b1669	873
	b1670	11	b1670	1572
	b1671	17	b1671	2846
	b1672	13	b1672	3931
	b1673	159	b1673	20870
	b1674	84	b1674	11818
	b1675	1	b1675	77
	b1676	923	b1676	14722
	b1677	4738	b1677	37771
	b1678	56	b1678	3332
	b1679	13	b1679	177
	b1680	27	b1680	836
	b1681	23	b1681	747
	b1682	11	b1682	326
	b1683	45	b1683	801
	b1684	12	b1684	304
	b1685	38	b1685	821
	b1686	25	b1686	203
	b1687	120	b1687	3336
	b1688	44	b1688	940
	b1689	7	b1689	81
	b1690	6	b1690	86
	b1691	4	b1691	10
	b1692	19	b1692	57
	b1693	33	b1693	713
	b1694	12	b1694	25
	b1695	4	b1695	42
	b1696	5	b1696	98
	b1697	6	b1697	56
	b1698	1	b1698	65
	b1699	5	b1699	57
	b1701	8	b1701	40
	b1702	666	b1702	8122
	b1703	53	b1703	533
	b1705	1	b1705	37
	b1706	29	b1706	964
	b1707	2	b1707	910
	b1708	41	b1708	1092
	b1709	16	b1709	562
	b1710	17	b1710	544
	b1711	22	b1711	515
	b1712	92	b1712	5094
	b1713	842	b1713	5615
	b1714	204	b1714	2570
	b1716	476	b1716	11618
	b1717	274	b1717	4038
	b1718	446	b1718	10841
	b1719	1446	b1719	28431
	b1722	4	b1722	273
	b1723	138	b1723	3236
	b1724	37	b1724	448
	b1725	290	b1725	9685
	b1726	13	b1726	475
	b1727	11	b1727	1061
	b1728	8	b1728	97
	b1729	152	b1729	1315
	b1732	213	b1732	1170
	b1733	14	b1733	535
	b1734	23	b1734	1023
	b1735	11	b1735	1364
	b1736	12	b1736	614
	b1737	29	b1737	2106
	b1738	26	b1738	1818
	b1739	87	b1739	3692
	b1740	64	b1740	2830
	b1741	9	b1741	489
	b1742	1	b1742	65
	b1743	17	b1743	186
	b1745	5	b1745	68
	b1746	2	b1746	93
	b1747	2	b1747	25
	b1748	1	b1748	22
	b1749	26	b1749	916
	b1750	8	b1750	546
	b1751	56	b1751	622
	b1752	24	b1752	316
	b1753	14	b1753	236
	b1754	28	b1754	680
	b1755	20	b1755	271
	b1756	12	b1756	136
	b1757	363	b1757	3313
	b1758	17	b1758	196
	b1761	48	b1761	2479
	b1763	41	b1763	3245
	b1764	183	b1764	4571
	b1765	50	b1765	1222
	b1766	36	b1766	1502
	b1767	6	b1767	966
	b1768	7	b1768	466
	b1769	7	b1769	55
	b1770	16	b1770	190
	b1771	5	b1771	83
	b1772	19	b1772	59
	b1773	21	b1773	80
	b1774	10	b1774	31
	b1775	12	b1775	22
	b1776	1	b1776	89
	b1777	8	b1777	366
	b1778	52	b1778	938
	b1779	8676	b1779	79709
	b1780	212	b1780	2778
	b1781	45	b1781	659
	b1782	168	b1782	1760
	b1783	217	b1783	6209
	b1784	9	b1784	970
	b1785	11	b1785	14
	b1787	25	b1787	1322
	b1789	5	b1789	269
	b1790	18	b1790	278
	b1791	11	b1791	241
	b1792	34	b1792	1606
	b1793	24	b1793	297
	b1794	13	b1794	2020
	b1795	18	b1795	219
	b1796	1	b1796	19
	b1797	1	b1797	16
	b1798	12	b1798	440
	b1799	35	b1799	1078
	b1800	46	b1800	305
	b1801	7	b1801	50
	b1802	22	b1802	102
	b1803	8	b1803	54
	b1804	11	b1804	431
	b1805	14	b1805	363
	b1806	9	b1806	456
	b1807	45	b1807	1032
	b1808	46	b1808	1305
	b1809	73	b1809	1133
	b1810	8	b1810	214
	b1811	4	b1811	55
	b1812	17	b1812	581
	b1813	13	b1813	576
	b1814	105	b1814	6488
	b1815	6	b1815	178
	b1816	138	b1816	4281
	b1817	2078	b1817	75496
	b1818	1648	b1818	36975
	b1819	1295	b1819	44027
	b1820	3	b1820	682
	b1821	4	b1821	137
	b1822	5	b1822	381
	b1823	344	b1823	5826
	b1824	4886	b1824	3471
	b1825	2	b1825	118
	b1826	3	b1826	120
	b1827	66	b1827	1559
	b1828	6	b1828	265
	b1829	118	b1829	1419
	b1830	145	b1830	4283
	b1831	167	b1831	3535
	b1832	56	b1832	1650
	b1833	11	b1833	539
	b1834	25	b1834	1643
	b1835	16	b1835	518
	b1836	18	b1836	250
	b1837	7	b1837	102
	b1839	18	b1839	489
	b1840	22	b1840	1016
	b1841	18	b1841	898
	b1842	10	b1842	145
	b1843	14	b1843	474
	b1844	14	b1844	612
	b1845	41	b1845	1272
	b1846	21	b1846	706
	b1847	35	b1847	499
	b1848	57	b1848	485
	b1849	23	b1849	181
	b1850	142	b1850	2840
	b1851	261	b1851	2500
	b1852	211	b1852	4212
	b1853	80	b1853	1782
	b1854	1174	b1854	20147
	b1855	55	b1855	1528
	b1856	71	b1856	2264
	b1857	21	b1857	1047
	b1858	16	b1858	710
	b1859	20	b1859	259
	b1860	45	b1860	937
	b1861	53	b1861	1404
	b1862	2	b1862	21
	b1863	25	b1863	1200
	b1864	368	b1864	3934
	b1865	44	b1865	1926
	b1866	497	b1866	10796
	b1867	32	b1867	1387
	b1868	26	b1868	429
	b1869	23	b1869	773
	b1870	20	b1870	591
	b1871	36	b1871	373
	b1872	15	b1872	217
	b1873	4	b1873	36
	b1874	6	b1874	543
	b1875	13	b1875	380
	b1876	86	b1876	2107
	b1879	24	b1879	266
	b1880	2	b1880	117
	b1881	3	b1881	116
	b1883	3	b1883	88
	b1885	9	b1885	93
	b1886	20	b1886	177
	b1887	8	b1887	75
	b1888	6	b1888	156
	b1889	5	b1889	87
	b1891	5	b1891	412
	b1892	6	b1892	324
	b1893	3	b1893	56
	b1895	80	b1895	1021
	b1896	91	b1896	2197
	b1897	57	b1897	1260
	b1900	40	b1900	1280
	b1901	76	b1901	2559
	b1902	57	b1902	2578
	b1905	565	b1905	8861
	b1906	11	b1906	179
	b1907	15	b1907	367
	b1908	101	b1908	3752
	b1912	40	b1912	1494
	b1913	74	b1913	3372
	b1914	34	b1914	2959
	b1915	4	b1915	43
	b1916	12	b1916	129
	b1917	22	b1917	530
	b1918	24	b1918	420
	b1919	51	b1919	1198
	b1920	233	b1920	2685
	b1921	7	b1921	146
	b1922	18	b1922	284
	b1923	132	b1923	1779
	b1924	6	b1924	116
	b1927	39	b1927	1174
	b1928	12	b1928	903
	b1929	270	b1929	2491
	b1930	36	b1930	444
	b1931	8	b1931	91
	b1938	12	b1938	339
	b1939	12	b1939	306
	b1941	3	b1941	311
	b1942	6	b1942	35
	b1943	9	b1943	214
	b1944	16	b1944	280
	b1945	18	b1945	451
	b1946	4	b1946	163
	b1949	2	b1949	13
	b1950	2	b1950	60
	b1951	3	b1951	28
	b1952	1	b1952	7
	b1953	15	b1953	331
	b1955	9	b1955	654
	b1956	24	b1956	899
	b1957	2	b1957	191
	b1958	23	b1958	710
	b1960	10	b1960	70
	b1961	16	b1961	1928
	b1962	8	b1962	480
	b1963	1	b1963	32
	b1967	188	b1967	2943
	b1968	10	b1968	255
	b1969	4	b1969	228
	b1971	19	b1971	386
	b1972	2	b1972	85
	b1973	12	b1973	64
	b1976	66	b1976	3394
	b1978	25	b1978	1063
	b1981	28	b1981	851
	b1982	162	b1982	3073
	b1983	144	b1983	1819
	b1985	15	b1985	352
	b1987	2	b1987	47
	b1988	6	b1988	84
	b1990	26	b1990	986
	b1991	19	b1991	1011
	b1992	32	b1992	476
	b1993	4	b1993	185
	b2000	539	b2000	1935
	b2001	29	b2001	178
	b2003	1	b2003	27
	b2007	105	b2007	4344
	b2008	19	b2008	644
	b2009	30	b2009	1044
	b2010	15	b2010	259
	b2011	90	b2011	1964
	b2012	12	b2012	93
	b2013	54	b2013	98
	b2014	27	b2014	202
	b2015	11	b2015	380
	b2016	118	b2016	3317
	b2017	34	b2017	334
	b2019	77	b2019	934
	b2020	65	b2020	970
	b2021	40	b2021	664
	b2022	66	b2022	1117
	b2023	23	b2023	401
	b2024	47	b2024	469
	b2025	44	b2025	460
	b2026	56	b2026	701
	b2027	55	b2027	2197
	b2028	2	b2028	347
	b2029	898	b2029	14395
	b2032	167	b2032	461
	b2033	77	b2033	518
	b2034	148	b2034	802
	b2035	51	b2035	212
	b2036	235	b2036	726
	b2037	125	b2037	251
	b2038	52	b2038	283
	b2039	110	b2039	1124
	b2040	87	b2040	808
	b2041	63	b2041	1465
	b2042	99	b2042	4086
	b2043	6	b2043	150
	b2044	10	b2044	79
	b2045	4	b2045	62
	b2046	6	b2046	55
	b2047	7	b2047	30
	b2048	9	b2048	23
	b2049	6	b2049	35
	b2050	5	b2050	27
	b2052	2	b2052	18
	b2053	8	b2053	36
	b2056	4	b2056	2
	b2057	2	b2057	25
	b2058	6	b2058	9
	b2059	1	b2059	14
	b2060	5	b2060	37
	b2061	3	b2061	7
	b2063	43	b2063	1557
	b2064	56	b2064	3006
	b2065	107	b2065	1723
	b2066	18	b2066	861
	b2067	24	b2067	1057
	b2068	20	b2068	446
	b2069	5	b2069	254
	b2070	8	b2070	168
	b2074	8	b2074	244
	b2075	26	b2075	369
	b2076	20	b2076	205
	b2077	1	b2077	88
	b2078	6	b2078	117
	b2079	2	b2079	400
	b2080	16	b2080	282
	b2081	20	b2081	550
	b2085	4	b2085	20
	b2086	9	b2086	340
	b2091	4867	b2091	55315
	b2093	5656	b2093	51816
	b2094	4105	b2094	71480
	b2095	16225	b2095	337658
	b2096	10237	b2096	257589
	b2097	306	b2097	7756
	b2098	9	b2098	102
	b2099	11	b2099	188
	b2100	11	b2100	148
	b2101	7	b2101	578
	b2103	3	b2103	101
	b2104	6	b2104	148
	b2105	8	b2105	157
	b2107	22	b2107	217
	b2108	4	b2108	6
	b2109	5	b2109	71
	b2111	22	b2111	409
	b2112	19	b2112	88
	b2113	350	b2113	8342
	b2114	148	b2114	3635
	b2118	13	b2118	187
	b2119	4	b2119	6
	b2120	5	b2120	80
	b2121	3	b2121	24
	b2124	26	b2124	1046
	b2125	38	b2125	1194
	b2126	72	b2126	2167
	b2127	47	b2127	473
	b2128	7	b2128	196
	b2129	8	b2129	314
	b2130	7	b2130	340
	b2131	14	b2131	963
	b2132	116	b2132	3204
	b2133	153	b2133	6547
	b2134	13	b2134	1364
	b2135	14	b2135	127
	b2136	25	b2136	841
	b2137	24	b2137	422
	b2140	6	b2140	135
	b2141	2	b2141	236
	b2142	23	b2142	488
	b2143	30	b2143	1506
	b2144	4	b2144	154
	b2145	5	b2145	127
	b2146	382	b2146	34913
	b2147	367	b2147	28145
	b2148	74	b2148	638
	b2149	35	b2149	558
	b2150	316	b2150	5002
	b2151	36	b2151	708
	b2152	10	b2152	269
	b2153	89	b2153	2091
	b2154	40	b2154	1900
	b2155	10	b2155	177
	b2156	22	b2156	1173
	b2157	35	b2157	1315
	b2158	12	b2158	303
	b2159	32	b2159	1269
	b2160	8	b2160	586
	b2161	3	b2161	56
	b2162	4	b2162	34
	b2164	5	b2164	104
	b2165	3	b2165	9
	b2166	8	b2166	9
	b2167	119	b2167	1680
	b2168	87	b2168	951
	b2169	85	b2169	901
	b2170	3	b2170	268
	b2171	14	b2171	487
	b2172	22	b2172	1153
	b2173	24	b2173	340
	b2174	7	b2174	169
	b2175	136	b2175	7980
	b2176	37	b2176	632
	b2177	13	b2177	1105
	b2178	2	b2178	222
	b2179	11	b2179	356
	b2180	31	b2180	1157
	b2181	15	b2181	567
	b2182	11	b2182	719
	b2183	2	b2183	1826
	b2184	42	b2184	907
	b2185	131	b2185	1996
	b2186	69	b2186	1568
	b2187	17	b2187	518
	b2188	44	b2188	1697
	b2193	43	b2193	1338
	b2194	57	b2194	573
	b2195	44	b2195	227
	b2196	86	b2196	796
	b2197	40	b2197	263
	b2198	11	b2198	37
	b2199	78	b2199	895
	b2200	36	b2200	280
	b2201	41	b2201	574
	b2202	105	b2202	602
	b2203	170	b2203	160
	b2204	114	b2204	180
	b2205	77	b2205	300
	b2206	990	b2206	2082
	b2209	136	b2209	3551
	b2210	11	b2210	203
	b2211	12	b2211	113
	b2212	13	b2212	112
	b2213	34	b2213	556
	b2214	7	b2214	331
	b2215	20211	b2215	312353
	b2216	178	b2216	4178
	b2217	197	b2217	6954
	b2218	67	b2218	1857
	b2219	62	b2219	1518
	b2220	43	b2220	1839
	b2221	9	b2221	32
	b2222	5	b2222	10
	b2223	6	b2223	32
	b2225	1	b2225	32
	b2226	1	b2226	90
	b2229	1	b2229	27
	b2230	4	b2230	150
	b2231	572	b2231	10771
	b2232	17	b2232	1089
	b2233	22	b2233	942
	b2234	111	b2234	4280
	b2235	78	b2235	2217
	b2237	17	b2237	475
	b2239	52	b2239	1103
	b2240	127	b2240	1313
	b2241	3	b2241	230
	b2242	5	b2242	195
	b2243	10	b2243	145
	b2244	4	b2244	61
	b2245	7	b2245	184
	b2246	11	b2246	186
	b2247	35	b2247	766
	b2248	9	b2248	125
	b2249	46	b2249	2420
	b2250	11	b2250	52
	b2251	8	b2251	338
	b2252	4	b2252	6
	b2253	1	b2253	169
	b2254	4	b2254	58
	b2255	16	b2255	282
	b2257	9	b2257	74
	b2259	6	b2259	287
	b2260	77	b2260	913
	b2261	96	b2261	1987
	b2262	220	b2262	2594
	b2263	88	b2263	575
	b2264	55	b2264	3006
	b2265	46	b2265	2386
	b2266	110	b2266	9025
	b2267	23	b2267	343
	b2268	14	b2268	540
	b2269	19	b2269	24
	b2270	12	b2270	51
	b2272	10	b2272	63
	b2275	2	b2275	114
	b2276	737	b2276	9983
	b2277	811	b2277	12666
	b2278	1212	b2278	17726
	b2279	168	b2279	1431
	b2280	401	b2280	4427
	b2281	357	b2281	3317
	b2282	448	b2282	7113
	b2283	1140	b2283	24655
	b2284	532	b2284	9148
	b2285	218	b2285	4425
	b2286	694	b2286	15502
	b2287	245	b2287	7426
	b2288	334	b2288	7166
	b2289	66	b2289	3974
	b2290	71	b2290	2397
	b2291	15	b2291	504
	b2292	81	b2292	2993
	b2293	43	b2293	2642
	b2294	111	b2294	5066
	b2295	14	b2295	1039
	b2296	504	b2296	18442
	b2297	989	b2297	19660
	b2298	41	b2298	918
	b2299	42	b2299	789
	b2300	26	b2300	942
	b2301	15	b2301	322
	b2302	6	b2302	347
	b2303	65	b2303	397
	b2304	75	b2304	2063
	b2306	5	b2306	47
	b2307	2	b2307	99
	b2308	4	b2308	142
	b2309	74	b2309	1455
	b2310	9	b2310	171
	b2311	5	b2311	139
	b2312	23	b2312	729
	b2313	14	b2313	304
	b2314	27	b2314	1838
	b2315	46	b2315	1301
	b2316	176	b2316	6271
	b2317	48	b2317	925
	b2318	29	b2318	762
	b2319	41	b2319	1044
	b2320	72	b2320	2575
	b2321	27	b2321	352
	b2322	1	b2322	109
	b2323	1299	b2323	41965
	b2324	35	b2324	2411
	b2325	6	b2325	300
	b2326	51	b2326	508
	b2327	10	b2327	649
	b2328	18	b2328	492
	b2329	35	b2329	1449
	b2330	97	b2330	1493
	b2331	28	b2331	615
	b2332	8	b2332	789
	b2333	3	b2333	28
	b2336	2	b2336	16
	b2340	14	b2340	846
	b2341	18	b2341	1170
	b2342	18	b2342	724
	b2343	282	b2343	11955
	b2344	93	b2344	1259
	b2345	17	b2345	16
	b2346	36	b2346	922
	b2347	12	b2347	261
	b2349	24	b2349	205
	b2350	7	b2350	446
	b2351	47	b2351	670
	b2352	69	b2352	54
	b2360	1	b2360	56
	b2362	1	b2362	5
	b2364	9	b2364	191
	b2365	11	b2365	77
	b2366	33	b2366	422
	b2367	3	b2367	4
	b2368	3	b2368	21
	b2369	36	b2369	2528
	b2370	64	b2370	1914
	b2371	2	b2371	10
	b2372	8	b2372	4
	b2373	5	b2373	25
	b2375	1	b2375	16
	b2377	59	b2377	344
	b2378	50	b2378	1962
	b2379	83	b2379	2767
	b2380	13	b2380	909
	b2381	13	b2381	744
	b2382	3	b2382	221
	b2383	17	b2383	176
	b2386	3	b2386	52
	b2388	126	b2388	4107
	b2389	11	b2389	758
	b2390	3	b2390	98
	b2392	12	b2392	237
	b2393	150	b2393	575
	b2394	34	b2394	358
	b2395	25	b2395	439
	b2398	9	b2398	1571
	b2399	13	b2399	935
	b2400	107	b2400	4346
	b2405	2	b2405	127
	b2406	5	b2406	55
	b2407	4	b2407	10
	b2409	12	b2409	160
	b2410	29	b2410	993
	b2411	80	b2411	1657
	b2412	132	b2412	4938
	b2413	8	b2413	490
	b2414	815	b2414	5412
	b2415	529	b2415	14618
	b2416	1801	b2416	31925
	b2417	668	b2417	12873
	b2418	111	b2418	2629
	b2419	6	b2419	43
	b2420	2	b2420	171
	b2421	47	b2421	626
	b2422	82	b2422	164
	b2423	19	b2423	70
	b2424	37	b2424	32
	b2425	20	b2425	123
	b2426	419	b2426	20132
	b2427	14	b2427	167
	b2428	30	b2428	1321
	b2429	16	b2429	1271
	b2430	9	b2430	1280
	b2431	334	b2431	7057
	b2432	15	b2432	509
	b2433	10	b2433	185
	b2434	8	b2434	295
	b2435	34	b2435	999
	b2436	12	b2436	378
	b2437	15	b2437	288
	b2438	2	b2438	225
	b2439	16	b2439	271
	b2440	47	b2440	518
	b2441	161	b2441	4388
	b2442	34	b2442	1137
	b2443	20	b2443	84
	b2446	1	b2446	17
	b2447	2	b2447	36
	b2449	1	b2449	131
	b2450	103	b2450	292
	b2451	4	b2451	26
	b2453	11	b2453	79
	b2454	10	b2454	24
	b2455	9	b2455	85
	b2457	11	b2457	96
	b2458	14	b2458	145
	b2459	2	b2459	52
	b2460	3	b2460	69
	b2462	2	b2462	13
	b2463	827	b2463	19154
	b2464	153	b2464	3179
	b2465	211	b2465	5121
	b2466	16	b2466	172
	b2467	15	b2467	1028
	b2468	27	b2468	3285
	b2469	22	b2469	832
	b2470	38	b2470	568
	b2471	56	b2471	1432
	b2472	60	b2472	2023
	b2473	11	b2473	551
	b2474	27	b2474	1417
	b2475	54	b2475	1635
	b2476	40	b2476	723
	b2477	136	b2477	4573
[truncated: 1,684 more rows]
