# Supplementary material for: An improved bacterial single-cell RNA-seq reveals biofilm heterogeneity
Source: eLife. 2024 Dec 17;13:RP97543. doi: 10.7554/eLife.97543 (PMC11651652; doi:10.7554/eLife.97543)
Supplement: Figure 2—figure supplement 1—source data 1. [file elife-97543-fig2-figsupp1-data1.xls]

## Sheet: Figure 2-figure supplement 1A
UMIs per cell of recovered cells		Figure 2-figure supplement 1A
SA		The median of UMIs
2956		SA
1452		142
1426
1407
1253
1202
1152
1088
1085
1074
1043
1013
960
903
896
892
870
852
845
840
828
819
816
815
799
789
787
770
764
761
758
755
749
748
748
735
728
725
721
713
712
712
708
708
706
701
700
696
695
687
683
679
676
670
669
666
659
659
654
648
647
643
641
640
639
639
639
638
634
629
628
623
623
621
617
616
615
609
606
604
604
604
603
601
599
597
595
594
593
592
587
586
585
581
580
579
577
577
575
571
570
568
568
567
564
563
556
556
556
555
555
555
553
552
552
548
546
545
544
543
542
542
542
541
539
539
538
536
536
535
535
534
534
533
533
533
532
531
529
529
528
527
527
527
526
526
525
525
522
522
521
520
520
519
518
516
516
515
513
513
512
510
509
505
505
505
504
504
503
502
499
499
498
498
496
496
496
495
494
494
494
490
490
490
489
488
488
487
487
487
487
486
486
486
484
484
481
481
481
481
480
479
479
478
478
477
477
476
476
476
475
475
475
475
475
473
473
471
471
470
470
469
469
468
468
466
465
465
465
464
463
462
462
462
462
461
460
460
457
455
455
455
455
454
454
454
453
453
453
452
451
451
450
450
450
450
449
448
448
448
447
446
446
446
445
445
444
443
443
443
442
442
442
441
441
441
440
440
440
439
439
438
438
438
437
437
436
436
436
435
434
434
433
433
432
432
432
432
432
432
432
432
431
431
431
430
430
430
429
429
428
428
428
428
427
427
426
426
426
426
426
425
425
425
425
424
424
424
423
423
423
422
422
421
421
421
421
421
421
421
420
419
419
418
418
417
417
416
416
416
416
416
416
416
415
415
415
415
414
414
414
414
413
413
412
412
411
411
410
409
409
409
408
408
408
407
407
407
407
406
405
405
405
405
405
403
403
403
403
403
403
402
402
402
401
401
401
401
401
401
400
400
399
399
399
399
399
398
398
398
398
397
397
397
396
396
396
396
396
396
396
395
395
395
395
394
394
394
394
394
393
393
393
393
393
392
392
391
391
390
390
390
390
390
389
389
389
389
389
388
388
388
388
388
388
387
387
386
386
386
386
385
385
385
384
384
384
384
384
383
383
383
383
383
383
382
382
382
382
381
381
381
380
380
380
380
380
380
380
380
379
379
379
378
378
378
378
378
378
378
378
377
377
377
377
377
377
377
377
376
376
375
375
375
375
374
374
374
374
374
374
373
373
373
373
373
372
372
372
372
372
371
371
371
371
371
371
370
370
370
370
369
369
369
368
368
368
368
368
368
367
367
367
366
366
366
366
365
365
365
365
364
364
364
364
364
363
363
363
363
363
363
362
362
362
362
362
361
361
361
361
360
360
360
360
360
359
359
358
358
358
357
357
357
357
356
356
356
356
355
355
355
354
354
354
354
354
354
354
354
353
353
352
352
352
352
352
352
352
351
351
351
351
351
351
350
350
350
350
350
350
349
349
349
348
348
347
347
347
347
347
347
347
347
346
346
346
345
345
345
345
345
344
343
342
342
342
342
342
342
341
341
341
341
340
340
340
340
340
339
339
339
339
339
339
339
338
338
338
338
337
337
337
337
337
337
336
336
336
336
336
336
336
336
335
335
335
335
335
334
334
334
334
334
334
334
333
333
333
333
333
333
333
333
332
332
332
331
331
331
330
330
330
329
329
329
329
329
329
328
328
328
328
327
326
326
326
326
325
325
325
325
325
325
325
324
324
324
324
324
324
324
324
324
324
324
324
323
323
323
323
323
323
323
323
322
322
322
322
322
322
321
321
321
321
321
321
321
321
321
321
321
320
320
320
320
320
320
320
320
320
320
319
319
319
319
319
318
318
318
318
318
317
317
317
317
317
317
317
317
317
316
316
316
316
316
316
316
316
316
316
315
315
315
315
315
315
315
314
314
314
314
314
314
313
313
313
313
313
313
313
312
312
312
312
312
312
311
311
311
310
310
310
310
310
310
310
310
309
309
309
309
309
308
308
308
308
308
308
308
308
308
308
307
307
307
307
306
306
306
306
306
306
306
306
305
305
305
305
305
305
305
305
305
304
304
304
304
304
303
303
303
303
303
303
303
303
303
302
302
302
302
302
302
302
302
302
302
302
302
302
301
301
301
301
301
301
300
300
300
300
299
299
299
299
299
298
298
298
298
298
298
298
298
298
297
297
297
297
297
297
297
297
297
297
296
296
296
296
296
296
295
295
295
295
295
295
294
294
294
293
293
293
293
293
293
293
293
293
292
292
292
292
292
292
292
291
291
291
291
291
291
291
291
290
290
290
290
290
290
290
290
290
290
290
290
289
289
289
289
289
289
289
289
289
289
289
289
289
288
288
288
288
288
288
288
288
288
287
287
287
287
287
287
287
286
286
286
286
285
285
285
285
285
285
285
285
285
285
285
284
284
284
284
284
284
284
283
283
283
283
283
283
283
283
283
283
282
282
282
282
282
282
282
282
282
281
281
281
280
280
280
280
280
280
280
280
280
280
280
280
280
280
279
279
279
279
279
279
279
279
279
278
278
278
278
278
278
278
278
278
277
277
277
277
277
277
277
277
276
276
276
276
276
276
276
276
275
275
275
275
275
275
275
275
275
274
274
274
274
274
274
274
274
274
274
273
273
273
273
273
273
273
273
273
273
273
272
272
272
272
272
272
272
272
271
271
271
271
271
271
271
271
271
271
271
271
270
270
270
270
270
270
270
270
270
270
269
269
269
269
269
269
269
269
269
269
269
269
269
268
268
268
268
268
268
268
268
268
267
267
267
267
267
267
267
267
267
267
267
267
267
267
267
266
266
266
266
266
266
266
266
266
266
266
266
266
266
266
266
266
266
266
266
265
265
265
265
265
265
265
265
265
265
265
265
264
264
264
264
264
264
264
264
264
264
264
263
263
263
263
263
263
263
262
262
262
262
262
262
262
262
262
262
262
262
262
262
262
262
261
261
261
261
261
261
261
261
261
261
261
261
261
261
261
261
261
261
260
260
260
260
260
260
260
260
260
260
260
260
260
260
260
260
260
260
259
259
259
259
259
259
259
259
259
259
259
259
259
259
259
259
258
258
258
258
258
258
258
258
258
258
258
258
258
257
257
257
257
257
257
257
257
257
257
257
257
257
257
256
256
256
256
256
256
256
256
256
256
256
256
256
256
256
256
256
256
255
255
255
255
255
255
255
255
255
255
255
254
254
254
254
254
254
254
254
254
254
254
254
253
253
253
253
253
253
253
253
253
253
253
252
252
252
252
252
252
252
252
252
252
252
252
252
252
252
252
252
252
252
252
251
251
251
251
251
251
251
251
251
251
251
251
251
251
251
250
250
250
250
250
250
250
250
250
250
250
250
250
250
250
250
250
250
250
249
249
249
249
249
249
249
249
249
249
249
249
249
249
249
249
249
248
248
248
248
248
248
248
248
248
248
248
248
248
248
248
248
248
248
248
248
248
247
247
247
247
247
247
247
247
247
247
247
247
247
247
247
247
247
247
247
247
246
246
246
246
246
246
246
246
246
246
246
246
246
246
246
245
245
245
245
245
245
245
245
245
245
245
245
245
245
245
245
245
245
245
244
244
244
244
244
244
244
244
244
244
244
244
244
243
243
243
243
243
243
243
243
243
243
243
243
243
243
243
243
243
243
243
243
243
243
243
243
243
243
243
243
242
242
242
242
242
242
242
242
242
242
242
242
242
242
242
242
242
242
241
241
241
241
241
241
241
241
241
241
241
241
241
241
241
241
241
241
241
241
241
241
240
240
240
240
240
240
240
240
240
240
240
240
240
240
240
240
240
240
240
240
240
240
240
240
240
240
240
240
240
240
239
239
239
239
239
239
239
239
239
239
239
239
239
239
239
239
239
239
239
239
239
239
239
238
238
238
238
238
238
238
238
238
238
238
238
238
238
238
238
238
238
237
237
237
237
237
237
237
237
237
237
237
237
237
237
237
237
237
237
237
236
236
236
236
236
236
236
236
236
236
236
236
236
236
236
235
235
235
235
235
235
235
235
235
235
235
235
235
235
235
235
235
235
235
235
235
235
235
235
234
234
234
234
234
234
234
234
234
234
234
234
234
234
234
234
234
234
234
234
234
234
234
233
233
233
233
233
233
233
233
233
233
233
233
233
233
233
233
233
233
233
233
233
233
233
233
233
233
233
232
232
232
232
232
232
232
232
232
232
232
232
232
232
232
232
232
232
232
232
232
231
231
231
231
231
231
231
231
231
231
231
231
231
231
231
231
231
231
231
231
231
231
230
230
230
230
230
230
230
230
230
230
230
230
230
230
230
230
230
230
230
230
230
230
230
230
230
230
229
229
229
229
229
229
229
229
229
229
229
229
229
229
229
229
229
229
229
229
229
229
229
229
228
228
228
228
228
228
228
228
228
228
228
228
228
228
228
228
228
228
228
228
228
228
228
228
227
227
227
227
227
227
227
227
227
227
227
227
227
227
227
227
227
227
227
226
226
226
226
226
226
226
226
226
226
226
226
226
226
225
225
225
225
225
225
225
225
225
225
225
225
225
225
225
225
225
225
224
224
224
[truncated: 7,984 more rows]

## Sheet: Figure 2-figure supplement 1B
Data of UMIs	RiboD-PETRI of SA					Figure 2-figure supplement 1B
	Top 1000	Top 5000	Top 8000			The median of UMIs
	2956	2956	2956			Top 1000	Top 5000	Top 8000
	1452	1452	1452			378	207	167
	1426	1426	1426
	1407	1407	1407
	1253	1253	1253
	1202	1202	1202
	1152	1152	1152
	1088	1088	1088
	1085	1085	1085
	1074	1074	1074
	1043	1043	1043
	1013	1013	1013
	960	960	960
	903	903	903
	896	896	896
	892	892	892
	870	870	870
	852	852	852
	845	845	845
	840	840	840
	828	828	828
	819	819	819
	816	816	816
	815	815	815
	799	799	799
	789	789	789
	787	787	787
	770	770	770
	764	764	764
	761	761	761
	758	758	758
	755	755	755
	749	749	749
	748	748	748
	748	748	748
	735	735	735
	728	728	728
	725	725	725
	721	721	721
	713	713	713
	712	712	712
	712	712	712
	708	708	708
	708	708	708
	706	706	706
	701	701	701
	700	700	700
	696	696	696
	695	695	695
	687	687	687
	683	683	683
	679	679	679
	676	676	676
	670	670	670
	669	669	669
	666	666	666
	659	659	659
	659	659	659
	654	654	654
	648	648	648
	647	647	647
	643	643	643
	641	641	641
	640	640	640
	639	639	639
	639	639	639
	639	639	639
	638	638	638
	634	634	634
	629	629	629
	628	628	628
	623	623	623
	623	623	623
	621	621	621
	617	617	617
	616	616	616
	615	615	615
	609	609	609
	606	606	606
	604	604	604
	604	604	604
	604	604	604
	603	603	603
	601	601	601
	599	599	599
	597	597	597
	595	595	595
	594	594	594
	593	593	593
	592	592	592
	587	587	587
	586	586	586
	585	585	585
	581	581	581
	580	580	580
	579	579	579
	577	577	577
	577	577	577
	575	575	575
	571	571	571
	570	570	570
	568	568	568
	568	568	568
	567	567	567
	564	564	564
	563	563	563
	556	556	556
	556	556	556
	556	556	556
	555	555	555
	555	555	555
	555	555	555
	553	553	553
	552	552	552
	552	552	552
	548	548	548
	546	546	546
	545	545	545
	544	544	544
	543	543	543
	542	542	542
	542	542	542
	542	542	542
	541	541	541
	539	539	539
	539	539	539
	538	538	538
	536	536	536
	536	536	536
	535	535	535
	535	535	535
	534	534	534
	534	534	534
	533	533	533
	533	533	533
	533	533	533
	532	532	532
	531	531	531
	529	529	529
	529	529	529
	528	528	528
	527	527	527
	527	527	527
	527	527	527
	526	526	526
	526	526	526
	525	525	525
	525	525	525
	522	522	522
	522	522	522
	521	521	521
	520	520	520
	520	520	520
	519	519	519
	518	518	518
	516	516	516
	516	516	516
	515	515	515
	513	513	513
	513	513	513
	512	512	512
	510	510	510
	509	509	509
	505	505	505
	505	505	505
	505	505	505
	504	504	504
	504	504	504
	503	503	503
	502	502	502
	499	499	499
	499	499	499
	498	498	498
	498	498	498
	496	496	496
	496	496	496
	496	496	496
	495	495	495
	494	494	494
	494	494	494
	494	494	494
	490	490	490
	490	490	490
	490	490	490
	489	489	489
	488	488	488
	488	488	488
	487	487	487
	487	487	487
	487	487	487
	487	487	487
	486	486	486
	486	486	486
	486	486	486
	484	484	484
	484	484	484
	481	481	481
	481	481	481
	481	481	481
	481	481	481
	480	480	480
	479	479	479
	479	479	479
	478	478	478
	478	478	478
	477	477	477
	477	477	477
	476	476	476
	476	476	476
	476	476	476
	475	475	475
	475	475	475
	475	475	475
	475	475	475
	475	475	475
	473	473	473
	473	473	473
	471	471	471
	471	471	471
	470	470	470
	470	470	470
	469	469	469
	469	469	469
	468	468	468
	468	468	468
	466	466	466
	465	465	465
	465	465	465
	465	465	465
	464	464	464
	463	463	463
	462	462	462
	462	462	462
	462	462	462
	462	462	462
	461	461	461
	460	460	460
	460	460	460
	457	457	457
	455	455	455
	455	455	455
	455	455	455
	455	455	455
	454	454	454
	454	454	454
	454	454	454
	453	453	453
	453	453	453
	453	453	453
	452	452	452
	451	451	451
	451	451	451
	450	450	450
	450	450	450
	450	450	450
	450	450	450
	449	449	449
	448	448	448
	448	448	448
	448	448	448
	447	447	447
	446	446	446
	446	446	446
	446	446	446
	445	445	445
	445	445	445
	444	444	444
	443	443	443
	443	443	443
	443	443	443
	442	442	442
	442	442	442
	442	442	442
	441	441	441
	441	441	441
	441	441	441
	440	440	440
	440	440	440
	440	440	440
	439	439	439
	439	439	439
	438	438	438
	438	438	438
	438	438	438
	437	437	437
	437	437	437
	436	436	436
	436	436	436
	436	436	436
	435	435	435
	434	434	434
	434	434	434
	433	433	433
	433	433	433
	432	432	432
	432	432	432
	432	432	432
	432	432	432
	432	432	432
	432	432	432
	432	432	432
	432	432	432
	431	431	431
	431	431	431
	431	431	431
	430	430	430
	430	430	430
	430	430	430
	429	429	429
	429	429	429
	428	428	428
	428	428	428
	428	428	428
	428	428	428
	427	427	427
	427	427	427
	426	426	426
	426	426	426
	426	426	426
	426	426	426
	426	426	426
	425	425	425
	425	425	425
	425	425	425
	425	425	425
	424	424	424
	424	424	424
	424	424	424
	423	423	423
	423	423	423
	423	423	423
	422	422	422
	422	422	422
	421	421	421
	421	421	421
	421	421	421
	421	421	421
	421	421	421
	421	421	421
	421	421	421
	420	420	420
	419	419	419
	419	419	419
	418	418	418
	418	418	418
	417	417	417
	417	417	417
	416	416	416
	416	416	416
	416	416	416
	416	416	416
	416	416	416
	416	416	416
	416	416	416
	415	415	415
	415	415	415
	415	415	415
	415	415	415
	414	414	414
	414	414	414
	414	414	414
	414	414	414
	413	413	413
	413	413	413
	412	412	412
	412	412	412
	411	411	411
	411	411	411
	410	410	410
	409	409	409
	409	409	409
	409	409	409
	408	408	408
	408	408	408
	408	408	408
	407	407	407
	407	407	407
	407	407	407
	407	407	407
	406	406	406
	405	405	405
	405	405	405
	405	405	405
	405	405	405
	405	405	405
	403	403	403
	403	403	403
	403	403	403
	403	403	403
	403	403	403
	403	403	403
	402	402	402
	402	402	402
	402	402	402
	401	401	401
	401	401	401
	401	401	401
	401	401	401
	401	401	401
	401	401	401
	400	400	400
	400	400	400
	399	399	399
	399	399	399
	399	399	399
	399	399	399
	399	399	399
	398	398	398
	398	398	398
	398	398	398
	398	398	398
	397	397	397
	397	397	397
	397	397	397
	396	396	396
	396	396	396
	396	396	396
	396	396	396
	396	396	396
	396	396	396
	396	396	396
	395	395	395
	395	395	395
	395	395	395
	395	395	395
	394	394	394
	394	394	394
	394	394	394
	394	394	394
	394	394	394
	393	393	393
	393	393	393
	393	393	393
	393	393	393
	393	393	393
	392	392	392
	392	392	392
	391	391	391
	391	391	391
	390	390	390
	390	390	390
	390	390	390
	390	390	390
	390	390	390
	389	389	389
	389	389	389
	389	389	389
	389	389	389
	389	389	389
	388	388	388
	388	388	388
	388	388	388
	388	388	388
	388	388	388
	388	388	388
	387	387	387
	387	387	387
	386	386	386
	386	386	386
	386	386	386
	386	386	386
	385	385	385
	385	385	385
	385	385	385
	384	384	384
	384	384	384
	384	384	384
	384	384	384
	384	384	384
	383	383	383
	383	383	383
	383	383	383
	383	383	383
	383	383	383
	383	383	383
	382	382	382
	382	382	382
	382	382	382
	382	382	382
	381	381	381
	381	381	381
	381	381	381
	380	380	380
	380	380	380
	380	380	380
	380	380	380
	380	380	380
	380	380	380
	380	380	380
	380	380	380
	379	379	379
	379	379	379
	379	379	379
	378	378	378
	378	378	378
	378	378	378
	378	378	378
	378	378	378
	378	378	378
	378	378	378
	378	378	378
	377	377	377
	377	377	377
	377	377	377
	377	377	377
	377	377	377
	377	377	377
	377	377	377
	377	377	377
	376	376	376
	376	376	376
	375	375	375
	375	375	375
	375	375	375
	375	375	375
	374	374	374
	374	374	374
	374	374	374
	374	374	374
	374	374	374
	374	374	374
	373	373	373
	373	373	373
	373	373	373
	373	373	373
	373	373	373
	372	372	372
	372	372	372
	372	372	372
	372	372	372
	372	372	372
	371	371	371
	371	371	371
	371	371	371
	371	371	371
	371	371	371
	371	371	371
	370	370	370
	370	370	370
	370	370	370
	370	370	370
	369	369	369
	369	369	369
	369	369	369
	368	368	368
	368	368	368
	368	368	368
	368	368	368
	368	368	368
	368	368	368
	367	367	367
	367	367	367
	367	367	367
	366	366	366
	366	366	366
	366	366	366
	366	366	366
	365	365	365
	365	365	365
	365	365	365
	365	365	365
	364	364	364
	364	364	364
	364	364	364
	364	364	364
	364	364	364
	363	363	363
	363	363	363
	363	363	363
	363	363	363
	363	363	363
	363	363	363
	362	362	362
	362	362	362
	362	362	362
	362	362	362
	362	362	362
	361	361	361
	361	361	361
	361	361	361
	361	361	361
	360	360	360
	360	360	360
	360	360	360
	360	360	360
	360	360	360
	359	359	359
	359	359	359
	358	358	358
	358	358	358
	358	358	358
	357	357	357
	357	357	357
	357	357	357
	357	357	357
	356	356	356
	356	356	356
	356	356	356
	356	356	356
	355	355	355
	355	355	355
	355	355	355
	354	354	354
	354	354	354
	354	354	354
	354	354	354
	354	354	354
	354	354	354
	354	354	354
	354	354	354
	353	353	353
	353	353	353
	352	352	352
	352	352	352
	352	352	352
	352	352	352
	352	352	352
	352	352	352
	352	352	352
	351	351	351
	351	351	351
	351	351	351
	351	351	351
	351	351	351
	351	351	351
	350	350	350
	350	350	350
	350	350	350
	350	350	350
	350	350	350
	350	350	350
	349	349	349
	349	349	349
	349	349	349
	348	348	348
	348	348	348
	347	347	347
	347	347	347
	347	347	347
	347	347	347
	347	347	347
	347	347	347
	347	347	347
	347	347	347
	346	346	346
	346	346	346
	346	346	346
	345	345	345
	345	345	345
	345	345	345
	345	345	345
	345	345	345
	344	344	344
	343	343	343
	342	342	342
	342	342	342
	342	342	342
	342	342	342
	342	342	342
	342	342	342
	341	341	341
	341	341	341
	341	341	341
	341	341	341
	340	340	340
	340	340	340
	340	340	340
	340	340	340
	340	340	340
	339	339	339
	339	339	339
	339	339	339
	339	339	339
	339	339	339
	339	339	339
	339	339	339
	338	338	338
	338	338	338
	338	338	338
	338	338	338
	337	337	337
	337	337	337
	337	337	337
	337	337	337
	337	337	337
	337	337	337
	336	336	336
	336	336	336
	336	336	336
	336	336	336
	336	336	336
	336	336	336
	336	336	336
	336	336	336
	335	335	335
	335	335	335
	335	335	335
	335	335	335
	335	335	335
	334	334	334
	334	334	334
	334	334	334
	334	334	334
	334	334	334
	334	334	334
	334	334	334
	333	333	333
	333	333	333
	333	333	333
	333	333	333
	333	333	333
	333	333	333
	333	333	333
	333	333	333
	332	332	332
	332	332	332
	332	332	332
	331	331	331
	331	331	331
	331	331	331
	330	330	330
	330	330	330
	330	330	330
	329	329	329
	329	329	329
	329	329	329
	329	329	329
	329	329	329
	329	329	329
	328	328	328
	328	328	328
	328	328	328
	328	328	328
	327	327	327
	326	326	326
	326	326	326
	326	326	326
	326	326	326
	325	325	325
	325	325	325
	325	325	325
	325	325	325
	325	325	325
	325	325	325
	325	325	325
	324	324	324
	324	324	324
	324	324	324
	324	324	324
	324	324	324
	324	324	324
	324	324	324
	324	324	324
	324	324	324
	324	324	324
	324	324	324
	324	324	324
	323	323	323
	323	323	323
	323	323	323
	323	323	323
	323	323	323
	323	323	323
	323	323	323
	323	323	323
	322	322	322
	322	322	322
	322	322	322
	322	322	322
	322	322	322
	322	322	322
	321	321	321
	321	321	321
	321	321	321
	321	321	321
	321	321	321
	321	321	321
	321	321	321
	321	321	321
	321	321	321
	321	321	321
	321	321	321
	320	320	320
	320	320	320
	320	320	320
	320	320	320
	320	320	320
	320	320	320
	320	320	320
	320	320	320
	320	320	320
	320	320	320
	319	319	319
	319	319	319
	319	319	319
	319	319	319
	319	319	319
	318	318	318
	318	318	318
	318	318	318
	318	318	318
	318	318	318
	317	317	317
	317	317	317
	317	317	317
	317	317	317
	317	317	317
	317	317	317
	317	317	317
	317	317	317
	317	317	317
	316	316	316
	316	316	316
	316	316	316
	316	316	316
	316	316	316
	316	316	316
	316	316	316
	316	316	316
	316	316	316
	316	316	316
	315	315	315
	315	315	315
	315	315	315
	315	315	315
	315	315	315
	315	315	315
	315	315	315
	314	314	314
	314	314	314
	314	314	314
	314	314	314
	314	314	314
	314	314	314
	313	313	313
	313	313	313
	313	313	313
	313	313	313
	313	313	313
	313	313	313
	313	313	313
	312	312	312
	312	312	312
	312	312	312
	312	312	312
	312	312	312
	312	312	312
	311	311	311
	311	311	311
	311	311	311
	310	310	310
	310	310	310
	310	310	310
	310	310	310
	310	310	310
	310	310	310
	310	310	310
	310	310	310
	309	309	309
	309	309	309
	309	309	309
	309	309	309
	309	309	309
	308	308	308
	308	308	308
	308	308	308
	308	308	308
	308	308	308
	308	308	308
	308	308	308
	308	308	308
	308	308	308
	308	308	308
	307	307	307
	307	307	307
	307	307	307
	307	307	307
	306	306	306
	306	306	306
	306	306	306
	306	306	306
	306	306	306
	306	306	306
	306	306	306
	306	306	306
	305	305	305
	305	305	305
	305	305	305
	305	305	305
	305	305	305
	305	305	305
	305	305	305
	305	305	305
	305	305	305
	304	304	304
	304	304	304
	304	304	304
	304	304	304
	304	304	304
	303	303	303
	303	303	303
	303	303	303
	303	303	303
	303	303	303
	303	303	303
	303	303	303
	303	303	303
	303	303	303
	302	302	302
	302	302	302
	302	302	302
	302	302	302
	302	302	302
	302	302	302
	302	302	302
	302	302	302
	302	302	302
	302	302	302
	302	302	302
	302	302	302
	302	302	302
	301	301	301
	301	301	301
	301	301	301
	301	301	301
	301	301	301
	301	301	301
	300	300	300
	300	300	300
	300	300	300
	300	300	300
	299	299	299
	299	299	299
	299	299	299
	299	299	299
	299	299	299
	298	298	298
	298	298	298
	298	298	298
	298	298	298
	298	298	298
	298	298	298
	298	298	298
	298	298	298
	298	298	298
	297	297	297
	297	297	297
	297	297	297
	297	297	297
	297	297	297
	297	297	297
	297	297	297
	297	297	297
	297	297	297
	297	297	297
	296	296	296
	296	296	296
	296	296	296
	296	296	296
	296	296	296
	296	296	296
	295	295	295
	295	295	295
	295	295	295
	295	295	295
	295	295	295
	295	295	295
	294	294	294
	294	294	294
	294	294	294
	293	293	293
	293	293	293
	293	293	293
	293	293	293
	293	293	293
	293	293	293
	293	293	293
	293	293	293
	293	293	293
	292	292	292
	292	292	292
	292	292	292
	292	292	292
	292	292	292
	292	292	292
	292	292	292
	291	291	291
	291	291	291
	291	291	291
	291	291	291
	291	291	291
	291	291	291
	291	291	291
	291	291	291
	290	290	290
	290	290	290
	290	290	290
	290	290	290
	290	290	290
	290	290	290
		290	290
		290	290
		290	290
		290	290
		290	290
		290	290
		289	289
		289	289
		289	289
		289	289
		289	289
		289	289
		289	289
		289	289
		289	289
		289	289
		289	289
		289	289
		289	289
		288	288
		288	288
		288	288
		288	288
		288	288
		288	288
		288	288
		288	288
		288	288
		287	287
		287	287
		287	287
		287	287
		287	287
		287	287
		287	287
		286	286
		286	286
		286	286
		286	286
		285	285
		285	285
		285	285
		285	285
		285	285
		285	285
		285	285
		285	285
		285	285
		285	285
		285	285
		284	284
		284	284
		284	284
		284	284
		284	284
		284	284
		284	284
		283	283
		283	283
		283	283
		283	283
		283	283
		283	283
		283	283
		283	283
		283	283
		283	283
		282	282
		282	282
		282	282
		282	282
		282	282
		282	282
		282	282
		282	282
		282	282
		281	281
		281	281
		281	281
		280	280
		280	280
		280	280
		280	280
		280	280
		280	280
		280	280
		280	280
		280	280
		280	280
		280	280
		280	280
		280	280
		280	280
		279	279
		279	279
		279	279
		279	279
		279	279
		279	279
		279	279
		279	279
		279	279
		278	278
		278	278
		278	278
		278	278
		278	278
		278	278
		278	278
		278	278
		278	278
		277	277
		277	277
		277	277
		277	277
		277	277
		277	277
		277	277
		277	277
		276	276
		276	276
		276	276
		276	276
		276	276
		276	276
		276	276
		276	276
		275	275
		275	275
		275	275
		275	275
		275	275
		275	275
		275	275
		275	275
		275	275
		274	274
		274	274
		274	274
		274	274
		274	274
		274	274
		274	274
		274	274
		274	274
		274	274
		273	273
		273	273
		273	273
		273	273
		273	273
		273	273
		273	273
		273	273
		273	273
		273	273
		273	273
		272	272
		272	272
		272	272
		272	272
		272	272
		272	272
		272	272
		272	272
		271	271
		271	271
		271	271
		271	271
		271	271
		271	271
		271	271
		271	271
		271	271
		271	271
		271	271
		271	271
		270	270
		270	270
		270	270
		270	270
		270	270
		270	270
		270	270
		270	270
		270	270
		270	270
		269	269
		269	269
		269	269
		269	269
		269	269
		269	269
		269	269
		269	269
		269	269
		269	269
		269	269
		269	269
		269	269
		268	268
		268	268
		268	268
		268	268
		268	268
		268	268
		268	268
		268	268
		268	268
		267	267
		267	267
		267	267
		267	267
		267	267
		267	267
		267	267
		267	267
		267	267
		267	267
		267	267
		267	267
		267	267
		267	267
		267	267
		266	266
		266	266
		266	266
		266	266
		266	266
		266	266
		266	266
		266	266
		266	266
		266	266
		266	266
		266	266
		266	266
		266	266
		266	266
		266	266
		266	266
		266	266
		266	266
		266	266
		265	265
		265	265
		265	265
		265	265
		265	265
		265	265
		265	265
		265	265
		265	265
		265	265
		265	265
		265	265
		264	264
		264	264
		264	264
		264	264
		264	264
		264	264
		264	264
		264	264
		264	264
		264	264
		264	264
		263	263
		263	263
		263	263
		263	263
		263	263
		263	263
		263	263
		262	262
		262	262
		262	262
		262	262
		262	262
		262	262
		262	262
		262	262
		262	262
		262	262
		262	262
		262	262
		262	262
		262	262
		262	262
		262	262
		261	261
		261	261
		261	261
		261	261
		261	261
		261	261
		261	261
		261	261
		261	261
		261	261
		261	261
		261	261
		261	261
		261	261
		261	261
		261	261
		261	261
		261	261
		260	260
		260	260
		260	260
		260	260
		260	260
		260	260
		260	260
		260	260
		260	260
		260	260
		260	260
		260	260
		260	260
		260	260
		260	260
		260	260
		260	260
		260	260
		259	259
		259	259
		259	259
		259	259
		259	259
		259	259
		259	259
		259	259
		259	259
		259	259
		259	259
		259	259
		259	259
		259	259
		259	259
		259	259
		258	258
		258	258
		258	258
		258	258
		258	258
		258	258
		258	258
		258	258
		258	258
		258	258
		258	258
		258	258
		258	258
		257	257
		257	257
		257	257
		257	257
		257	257
		257	257
		257	257
		257	257
		257	257
		257	257
		257	257
		257	257
		257	257
		257	257
		256	256
		256	256
		256	256
		256	256
		256	256
		256	256
		256	256
		256	256
		256	256
		256	256
		256	256
		256	256
		256	256
		256	256
		256	256
		256	256
		256	256
		256	256
		255	255
		255	255
		255	255
		255	255
		255	255
		255	255
		255	255
		255	255
		255	255
		255	255
		255	255
		254	254
		254	254
		254	254
		254	254
		254	254
		254	254
		254	254
		254	254
		254	254
		254	254
		254	254
		254	254
		253	253
		253	253
		253	253
		253	253
		253	253
		253	253
		253	253
		253	253
		253	253
		253	253
		253	253
		252	252
		252	252
		252	252
		252	252
		252	252
		252	252
		252	252
		252	252
		252	252
		252	252
		252	252
		252	252
		252	252
		252	252
		252	252
		252	252
		252	252
		252	252
		252	252
		252	252
		251	251
		251	251
		251	251
		251	251
		251	251
		251	251
		251	251
		251	251
		251	251
		251	251
		251	251
		251	251
		251	251
		251	251
		251	251
		250	250
		250	250
		250	250
		250	250
		250	250
		250	250
		250	250
		250	250
		250	250
		250	250
		250	250
		250	250
		250	250
		250	250
		250	250
		250	250
		250	250
		250	250
		250	250
		249	249
		249	249
		249	249
		249	249
		249	249
		249	249
		249	249
		249	249
		249	249
		249	249
		249	249
		249	249
		249	249
		249	249
		249	249
		249	249
		249	249
		248	248
		248	248
		248	248
		248	248
		248	248
		248	248
		248	248
		248	248
		248	248
		248	248
		248	248
		248	248
		248	248
		248	248
		248	248
		248	248
		248	248
		248	248
		248	248
		248	248
		248	248
		247	247
		247	247
		247	247
		247	247
		247	247
		247	247
		247	247
		247	247
		247	247
		247	247
		247	247
		247	247
		247	247
		247	247
		247	247
		247	247
		247	247
		247	247
		247	247
		247	247
		246	246
		246	246
		246	246
		246	246
		246	246
		246	246
		246	246
		246	246
		246	246
		246	246
		246	246
		246	246
		246	246
		246	246
		246	246
		245	245
		245	245
		245	245
		245	245
		245	245
		245	245
		245	245
		245	245
		245	245
		245	245
		245	245
		245	245
		245	245
		245	245
		245	245
		245	245
		245	245
		245	245
		245	245
		244	244
		244	244
		244	244
		244	244
		244	244
		244	244
		244	244
		244	244
		244	244
		244	244
		244	244
		244	244
		244	244
		243	243
		243	243
		243	243
		243	243
		243	243
		243	243
		243	243
		243	243
		243	243
		243	243
		243	243
		243	243
		243	243
		243	243
		243	243
		243	243
		243	243
		243	243
		243	243
		243	243
		243	243
		243	243
		243	243
		243	243
		243	243
		243	243
		243	243
		243	243
		242	242
		242	242
		242	242
		242	242
		242	242
		242	242
		242	242
		242	242
		242	242
		242	242
		242	242
		242	242
		242	242
		242	242
		242	242
		242	242
		242	242
		242	242
		241	241
		241	241
		241	241
		241	241
		241	241
		241	241
		241	241
		241	241
		241	241
		241	241
		241	241
		241	241
		241	241
		241	241
		241	241
		241	241
		241	241
		241	241
		241	241
		241	241
		241	241
		241	241
		240	240
		240	240
		240	240
		240	240
		240	240
		240	240
		240	240
		240	240
		240	240
		240	240
		240	240
		240	240
		240	240
		240	240
		240	240
		240	240
		240	240
		240	240
		240	240
		240	240
		240	240
		240	240
		240	240
		240	240
		240	240
		240	240
		240	240
		240	240
		240	240
		240	240
		239	239
		239	239
		239	239
		239	239
		239	239
		239	239
		239	239
		239	239
		239	239
		239	239
		239	239
		239	239
		239	239
		239	239
		239	239
		239	239
		239	239
		239	239
		239	239
		239	239
		239	239
		239	239
		239	239
		238	238
		238	238
		238	238
		238	238
		238	238
		238	238
		238	238
		238	238
		238	238
		238	238
		238	238
		238	238
		238	238
		238	238
		238	238
		238	238
		238	238
		238	238
		237	237
		237	237
		237	237
		237	237
		237	237
		237	237
		237	237
		237	237
		237	237
		237	237
		237	237
		237	237
		237	237
		237	237
		237	237
		237	237
		237	237
		237	237
		237	237
		236	236
		236	236
		236	236
		236	236
		236	236
		236	236
		236	236
		236	236
		236	236
		236	236
		236	236
		236	236
		236	236
		236	236
		236	236
		235	235
		235	235
		235	235
		235	235
		235	235
		235	235
		235	235
		235	235
		235	235
		235	235
		235	235
		235	235
		235	235
		235	235
		235	235
		235	235
		235	235
		235	235
		235	235
		235	235
		235	235
		235	235
		235	235
		235	235
		234	234
		234	234
		234	234
		234	234
		234	234
		234	234
		234	234
		234	234
		234	234
		234	234
		234	234
		234	234
		234	234
		234	234
		234	234
		234	234
		234	234
		234	234
		234	234
		234	234
		234	234
		234	234
		234	234
		233	233
		233	233
		233	233
		233	233
		233	233
		233	233
		233	233
		233	233
		233	233
		233	233
		233	233
		233	233
		233	233
		233	233
		233	233
		233	233
		233	233
		233	233
		233	233
		233	233
		233	233
		233	233
		233	233
		233	233
		233	233
		233	233
		233	233
		232	232
		232	232
		232	232
		232	232
		232	232
		232	232
		232	232
		232	232
		232	232
		232	232
		232	232
		232	232
		232	232
		232	232
		232	232
		232	232
		232	232
		232	232
		232	232
		232	232
		232	232
		231	231
		231	231
		231	231
		231	231
		231	231
		231	231
		231	231
		231	231
		231	231
		231	231
		231	231
		231	231
		231	231
		231	231
		231	231
		231	231
		231	231
		231	231
		231	231
		231	231
		231	231
		231	231
		230	230
		230	230
		230	230
		230	230
		230	230
		230	230
		230	230
		230	230
		230	230
		230	230
		230	230
		230	230
		230	230
		230	230
		230	230
		230	230
		230	230
		230	230
		230	230
		230	230
		230	230
		230	230
		230	230
		230	230
		230	230
		230	230
		229	229
		229	229
		229	229
		229	229
		229	229
		229	229
		229	229
		229	229
		229	229
		229	229
		229	229
		229	229
		229	229
		229	229
		229	229
		229	229
		229	229
		229	229
		229	229
		229	229
		229	229
		229	229
		229	229
		229	229
		228	228
		228	228
		228	228
		228	228
		228	228
		228	228
		228	228
		228	228
		228	228
		228	228
		228	228
		228	228
		228	228
		228	228
		228	228
		228	228
		228	228
		228	228
		228	228
		228	228
		228	228
		228	228
		228	228
		228	228
		227	227
		227	227
		227	227
		227	227
		227	227
		227	227
		227	227
		227	227
		227	227
		227	227
		227	227
		227	227
		227	227
		227	227
		227	227
		227	227
		227	227
		227	227
		227	227
		226	226
		226	226
		226	226
		226	226
		226	226
		226	226
		226	226
		226	226
		226	226
		226	226
		226	226
		226	226
		226	226
		226	226
		225	225
		225	225
		225	225
		225	225
		225	225
		225	225
		225	225
		225	225
		225	225
		225	225
		225	225
		225	225
		225	225
		225	225
		225	225
		225	225
		225	225
		225	225
		224	224
		224	224
		224	224
[truncated: 6,003 more rows]

## Sheet: Figure 2-figure supplement 1C
Data of genes	RiboD-PETRI of SA					Figure 2-figure supplement 1C
	Top 1000	Top 5000	Top 8000			The median of genes
	1070	1070	1070			Top 1000	Top 5000	Top 8000
	786	786	786			308	194	158
	751	751	751
	751	751	751
	725	725	725
	718	718	718
	693	693	693
	681	681	681
	657	657	657
	649	649	649
	648	648	648
	644	644	644
	619	619	619
	617	617	617
	601	601	601
	568	568	568
	564	564	564
	554	554	554
	552	552	552
	547	547	547
	545	545	545
	541	541	541
	536	536	536
	530	530	530
	527	527	527
	524	524	524
	524	524	524
	521	521	521
	519	519	519
	517	517	517
	515	515	515
	511	511	511
	507	507	507
	505	505	505
	503	503	503
	503	503	503
	500	500	500
	498	498	498
	498	498	498
	498	498	498
	497	497	497
	490	490	490
	488	488	488
	488	488	488
	486	486	486
	481	481	481
	480	480	480
	480	480	480
	473	473	473
	473	473	473
	472	472	472
	472	472	472
	470	470	470
	468	468	468
	466	466	466
	465	465	465
	464	464	464
	464	464	464
	463	463	463
	462	462	462
	462	462	462
	461	461	461
	461	461	461
	461	461	461
	455	455	455
	455	455	455
	451	451	451
	450	450	450
	450	450	450
	447	447	447
	447	447	447
	446	446	446
	446	446	446
	444	444	444
	444	444	444
	443	443	443
	442	442	442
	442	442	442
	442	442	442
	442	442	442
	440	440	440
	438	438	438
	438	438	438
	434	434	434
	434	434	434
	434	434	434
	431	431	431
	431	431	431
	431	431	431
	431	431	431
	429	429	429
	429	429	429
	429	429	429
	427	427	427
	427	427	427
	426	426	426
	426	426	426
	425	425	425
	425	425	425
	423	423	423
	422	422	422
	421	421	421
	419	419	419
	417	417	417
	417	417	417
	416	416	416
	416	416	416
	416	416	416
	415	415	415
	414	414	414
	413	413	413
	413	413	413
	412	412	412
	412	412	412
	412	412	412
	411	411	411
	410	410	410
	410	410	410
	407	407	407
	407	407	407
	405	405	405
	405	405	405
	405	405	405
	404	404	404
	404	404	404
	401	401	401
	400	400	400
	400	400	400
	400	400	400
	399	399	399
	398	398	398
	398	398	398
	398	398	398
	397	397	397
	395	395	395
	395	395	395
	394	394	394
	394	394	394
	394	394	394
	394	394	394
	394	394	394
	394	394	394
	393	393	393
	393	393	393
	393	393	393
	392	392	392
	392	392	392
	391	391	391
	390	390	390
	390	390	390
	389	389	389
	389	389	389
	389	389	389
	389	389	389
	387	387	387
	387	387	387
	386	386	386
	386	386	386
	386	386	386
	386	386	386
	385	385	385
	385	385	385
	385	385	385
	385	385	385
	385	385	385
	385	385	385
	384	384	384
	383	383	383
	383	383	383
	383	383	383
	382	382	382
	382	382	382
	381	381	381
	381	381	381
	380	380	380
	380	380	380
	380	380	380
	379	379	379
	379	379	379
	379	379	379
	378	378	378
	378	378	378
	377	377	377
	376	376	376
	376	376	376
	376	376	376
	375	375	375
	375	375	375
	375	375	375
	374	374	374
	374	374	374
	374	374	374
	374	374	374
	374	374	374
	374	374	374
	374	374	374
	373	373	373
	373	373	373
	372	372	372
	372	372	372
	372	372	372
	371	371	371
	371	371	371
	371	371	371
	371	371	371
	371	371	371
	370	370	370
	370	370	370
	369	369	369
	369	369	369
	369	369	369
	369	369	369
	369	369	369
	368	368	368
	367	367	367
	367	367	367
	367	367	367
	366	366	366
	365	365	365
	365	365	365
	365	365	365
	364	364	364
	364	364	364
	364	364	364
	364	364	364
	364	364	364
	363	363	363
	362	362	362
	362	362	362
	362	362	362
	361	361	361
	361	361	361
	360	360	360
	360	360	360
	359	359	359
	359	359	359
	359	359	359
	359	359	359
	358	358	358
	358	358	358
	358	358	358
	358	358	358
	358	358	358
	357	357	357
	357	357	357
	357	357	357
	357	357	357
	356	356	356
	356	356	356
	356	356	356
	356	356	356
	356	356	356
	355	355	355
	355	355	355
	355	355	355
	355	355	355
	354	354	354
	354	354	354
	354	354	354
	354	354	354
	353	353	353
	353	353	353
	352	352	352
	352	352	352
	352	352	352
	352	352	352
	352	352	352
	352	352	352
	352	352	352
	352	352	352
	352	352	352
	351	351	351
	351	351	351
	351	351	351
	351	351	351
	351	351	351
	351	351	351
	351	351	351
	351	351	351
	351	351	351
	350	350	350
	350	350	350
	350	350	350
	349	349	349
	349	349	349
	348	348	348
	348	348	348
	348	348	348
	347	347	347
	347	347	347
	347	347	347
	347	347	347
	347	347	347
	347	347	347
	346	346	346
	346	346	346
	346	346	346
	345	345	345
	345	345	345
	345	345	345
	345	345	345
	345	345	345
	345	345	345
	344	344	344
	344	344	344
	344	344	344
	344	344	344
	344	344	344
	343	343	343
	343	343	343
	343	343	343
	343	343	343
	342	342	342
	342	342	342
	342	342	342
	342	342	342
	342	342	342
	342	342	342
	342	342	342
	341	341	341
	341	341	341
	341	341	341
	341	341	341
	340	340	340
	340	340	340
	340	340	340
	340	340	340
	340	340	340
	340	340	340
	340	340	340
	339	339	339
	339	339	339
	338	338	338
	338	338	338
	338	338	338
	337	337	337
	337	337	337
	337	337	337
	337	337	337
	336	336	336
	336	336	336
	336	336	336
	336	336	336
	335	335	335
	334	334	334
	334	334	334
	334	334	334
	333	333	333
	333	333	333
	333	333	333
	333	333	333
	332	332	332
	332	332	332
	332	332	332
	332	332	332
	332	332	332
	331	331	331
	331	331	331
	331	331	331
	331	331	331
	331	331	331
	331	331	331
	331	331	331
	331	331	331
	331	331	331
	330	330	330
	330	330	330
	330	330	330
	330	330	330
	329	329	329
	329	329	329
	329	329	329
	328	328	328
	328	328	328
	328	328	328
	328	328	328
	327	327	327
	327	327	327
	327	327	327
	327	327	327
	326	326	326
	326	326	326
	326	326	326
	326	326	326
	326	326	326
	326	326	326
	326	326	326
	326	326	326
	325	325	325
	325	325	325
	325	325	325
	324	324	324
	324	324	324
	324	324	324
	324	324	324
	324	324	324
	324	324	324
	324	324	324
	324	324	324
	323	323	323
	323	323	323
	323	323	323
	323	323	323
	323	323	323
	323	323	323
	323	323	323
	322	322	322
	322	322	322
	322	322	322
	322	322	322
	322	322	322
	322	322	322
	322	322	322
	322	322	322
	321	321	321
	320	320	320
	320	320	320
	320	320	320
	319	319	319
	319	319	319
	319	319	319
	319	319	319
	319	319	319
	319	319	319
	319	319	319
	319	319	319
	318	318	318
	318	318	318
	318	318	318
	317	317	317
	317	317	317
	317	317	317
	317	317	317
	317	317	317
	316	316	316
	316	316	316
	316	316	316
	316	316	316
	316	316	316
	316	316	316
	316	316	316
	315	315	315
	315	315	315
	315	315	315
	315	315	315
	314	314	314
	314	314	314
	314	314	314
	314	314	314
	314	314	314
	314	314	314
	313	313	313
	313	313	313
	313	313	313
	313	313	313
	313	313	313
	313	313	313
	313	313	313
	312	312	312
	312	312	312
	312	312	312
	312	312	312
	312	312	312
	312	312	312
	312	312	312
	311	311	311
	311	311	311
	311	311	311
	311	311	311
	311	311	311
	311	311	311
	311	311	311
	311	311	311
	311	311	311
	310	310	310
	310	310	310
	310	310	310
	310	310	310
	310	310	310
	310	310	310
	310	310	310
	310	310	310
	310	310	310
	310	310	310
	310	310	310
	310	310	310
	310	310	310
	309	309	309
	309	309	309
	309	309	309
	309	309	309
	309	309	309
	309	309	309
	308	308	308
	308	308	308
	308	308	308
	308	308	308
	308	308	308
	308	308	308
	308	308	308
	308	308	308
	308	308	308
	307	307	307
	307	307	307
	307	307	307
	307	307	307
	306	306	306
	306	306	306
	306	306	306
	306	306	306
	306	306	306
	306	306	306
	306	306	306
	306	306	306
	306	306	306
	305	305	305
	305	305	305
	305	305	305
	305	305	305
	305	305	305
	304	304	304
	304	304	304
	304	304	304
	304	304	304
	304	304	304
	304	304	304
	304	304	304
	304	304	304
	303	303	303
	303	303	303
	303	303	303
	303	303	303
	303	303	303
	303	303	303
	303	303	303
	303	303	303
	303	303	303
	302	302	302
	302	302	302
	302	302	302
	302	302	302
	302	302	302
	301	301	301
	301	301	301
	301	301	301
	301	301	301
	301	301	301
	301	301	301
	301	301	301
	300	300	300
	300	300	300
	300	300	300
	300	300	300
	300	300	300
	300	300	300
	300	300	300
	299	299	299
	299	299	299
	299	299	299
	299	299	299
	299	299	299
	299	299	299
	299	299	299
	299	299	299
	298	298	298
	298	298	298
	298	298	298
	298	298	298
	298	298	298
	298	298	298
	298	298	298
	298	298	298
	298	298	298
	297	297	297
	296	296	296
	296	296	296
	296	296	296
	296	296	296
	296	296	296
	296	296	296
	296	296	296
	295	295	295
	295	295	295
	295	295	295
	295	295	295
	295	295	295
	295	295	295
	295	295	295
	295	295	295
	295	295	295
	295	295	295
	294	294	294
	294	294	294
	294	294	294
	294	294	294
	294	294	294
	294	294	294
	294	294	294
	294	294	294
	293	293	293
	293	293	293
	293	293	293
	293	293	293
	293	293	293
	293	293	293
	293	293	293
	293	293	293
	293	293	293
	293	293	293
	293	293	293
	292	292	292
	292	292	292
	292	292	292
	292	292	292
	292	292	292
	292	292	292
	292	292	292
	291	291	291
	291	291	291
	291	291	291
	291	291	291
	291	291	291
	290	290	290
	290	290	290
	290	290	290
	290	290	290
	290	290	290
	289	289	289
	289	289	289
	289	289	289
	289	289	289
	289	289	289
	289	289	289
	289	289	289
	289	289	289
	288	288	288
	288	288	288
	288	288	288
	288	288	288
	288	288	288
	288	288	288
	288	288	288
	288	288	288
	288	288	288
	287	287	287
	287	287	287
	287	287	287
	287	287	287
	287	287	287
	287	287	287
	287	287	287
	287	287	287
	286	286	286
	286	286	286
	286	286	286
	286	286	286
	286	286	286
	285	285	285
	285	285	285
	285	285	285
	285	285	285
	285	285	285
	285	285	285
	284	284	284
	284	284	284
	284	284	284
	284	284	284
	284	284	284
	284	284	284
	284	284	284
	284	284	284
	283	283	283
	283	283	283
	283	283	283
	283	283	283
	283	283	283
	282	282	282
	282	282	282
	282	282	282
	282	282	282
	282	282	282
	282	282	282
	282	282	282
	282	282	282
	281	281	281
	281	281	281
	281	281	281
	281	281	281
	281	281	281
	281	281	281
	281	281	281
	281	281	281
	281	281	281
	281	281	281
	281	281	281
	281	281	281
	280	280	280
	280	280	280
	280	280	280
	280	280	280
	280	280	280
	280	280	280
	280	280	280
	280	280	280
	280	280	280
	279	279	279
	279	279	279
	279	279	279
	279	279	279
	279	279	279
	279	279	279
	279	279	279
	278	278	278
	278	278	278
	278	278	278
	278	278	278
	278	278	278
	278	278	278
	278	278	278
	278	278	278
	278	278	278
	278	278	278
	278	278	278
	278	278	278
	278	278	278
	278	278	278
	278	278	278
	278	278	278
	278	278	278
	278	278	278
	278	278	278
	277	277	277
	277	277	277
	277	277	277
	277	277	277
	277	277	277
	277	277	277
	277	277	277
	277	277	277
	276	276	276
	276	276	276
	276	276	276
	276	276	276
	276	276	276
	276	276	276
	276	276	276
	276	276	276
	276	276	276
	275	275	275
	275	275	275
	275	275	275
	275	275	275
	275	275	275
	275	275	275
	275	275	275
	275	275	275
	275	275	275
	275	275	275
	274	274	274
	274	274	274
	274	274	274
	274	274	274
	274	274	274
	274	274	274
	274	274	274
	274	274	274
	274	274	274
	274	274	274
	274	274	274
	273	273	273
	273	273	273
	273	273	273
	273	273	273
	273	273	273
	273	273	273
	272	272	272
	272	272	272
	272	272	272
	272	272	272
	272	272	272
	272	272	272
	272	272	272
	272	272	272
	272	272	272
	272	272	272
	272	272	272
	272	272	272
	271	271	271
	271	271	271
	271	271	271
	271	271	271
	271	271	271
	271	271	271
	271	271	271
	271	271	271
	271	271	271
	271	271	271
	271	271	271
	271	271	271
	271	271	271
	271	271	271
	270	270	270
	270	270	270
	270	270	270
	270	270	270
	270	270	270
	270	270	270
	270	270	270
	270	270	270
	270	270	270
	270	270	270
	270	270	270
	270	270	270
	270	270	270
	270	270	270
	270	270	270
	269	269	269
	269	269	269
	269	269	269
	269	269	269
	269	269	269
	269	269	269
	269	269	269
	269	269	269
	269	269	269
	269	269	269
	268	268	268
	268	268	268
	268	268	268
	268	268	268
	268	268	268
	268	268	268
	268	268	268
	268	268	268
	268	268	268
	268	268	268
	268	268	268
	268	268	268
	268	268	268
	267	267	267
	267	267	267
	267	267	267
	267	267	267
	267	267	267
	267	267	267
	267	267	267
	267	267	267
	267	267	267
	267	267	267
	267	267	267
	267	267	267
	267	267	267
	267	267	267
	266	266	266
	266	266	266
	266	266	266
	266	266	266
	266	266	266
	266	266	266
	266	266	266
	266	266	266
	266	266	266
	266	266	266
	266	266	266
	266	266	266
	266	266	266
	266	266	266
	265	265	265
	265	265	265
	265	265	265
	265	265	265
	265	265	265
	265	265	265
	265	265	265
	265	265	265
	264	264	264
	264	264	264
	264	264	264
	264	264	264
	264	264	264
	264	264	264
	264	264	264
	264	264	264
	264	264	264
	264	264	264
	264	264	264
	263	263	263
	263	263	263
	263	263	263
	263	263	263
	263	263	263
	263	263	263
	263	263	263
	263	263	263
	263	263	263
	263	263	263
	262	262	262
	262	262	262
	262	262	262
	262	262	262
	262	262	262
	262	262	262
	262	262	262
	262	262	262
	262	262	262
	262	262	262
	262	262	262
	262	262	262
	262	262	262
	261	261	261
	261	261	261
	261	261	261
	261	261	261
	261	261	261
	261	261	261
	261	261	261
	261	261	261
	261	261	261
	261	261	261
	261	261	261
	261	261	261
	261	261	261
	261	261	261
	261	261	261
	261	261	261
	261	261	261
	260	260	260
	260	260	260
	260	260	260
	260	260	260
	260	260	260
	260	260	260
	260	260	260
	260	260	260
	260	260	260
	260	260	260
	260	260	260
	260	260	260
	260	260	260
	260	260	260
	260	260	260
	259	259	259
	259	259	259
	259	259	259
	259	259	259
	259	259	259
	258	258	258
	258	258	258
	258	258	258
	258	258	258
	258	258	258
	258	258	258
	258	258	258
	258	258	258
	258	258	258
	258	258	258
	258	258	258
	258	258	258
	257	257	257
	257	257	257
	257	257	257
	257	257	257
	257	257	257
	257	257	257
	257	257	257
	257	257	257
	257	257	257
	257	257	257
	257	257	257
	257	257	257
	257	257	257
	256	256	256
	256	256	256
	256	256	256
	256	256	256
	256	256	256
	256	256	256
	256	256	256
	256	256	256
	256	256	256
	256	256	256
	256	256	256
	256	256	256
	256	256	256
	256	256	256
	256	256	256
	256	256	256
	255	255	255
	255	255	255
	255	255	255
	255	255	255
	255	255	255
	255	255	255
	255	255	255
	255	255	255
	255	255	255
	255	255	255
	255	255	255
	255	255	255
	255	255	255
		254	254
		254	254
		254	254
		254	254
		254	254
		254	254
		254	254
		254	254
		254	254
		254	254
		254	254
		254	254
		253	253
		253	253
		253	253
		253	253
		253	253
		253	253
		253	253
		253	253
		253	253
		253	253
		253	253
		253	253
		253	253
		253	253
		253	253
		252	252
		252	252
		252	252
		252	252
		252	252
		252	252
		252	252
		252	252
		252	252
		252	252
		252	252
		252	252
		252	252
		252	252
		251	251
		251	251
		251	251
		251	251
		251	251
		251	251
		251	251
		251	251
		251	251
		251	251
		251	251
		251	251
		251	251
		251	251
		250	250
		250	250
		250	250
		250	250
		250	250
		250	250
		250	250
		250	250
		250	250
		250	250
		250	250
		250	250
		250	250
		250	250
		249	249
		249	249
		249	249
		249	249
		249	249
		249	249
		249	249
		249	249
		249	249
		249	249
		249	249
		248	248
		248	248
		248	248
		248	248
		248	248
		248	248
		248	248
		248	248
		248	248
		248	248
		248	248
		248	248
		248	248
		248	248
		247	247
		247	247
		247	247
		247	247
		247	247
		247	247
		247	247
		247	247
		247	247
		247	247
		247	247
		247	247
		247	247
		247	247
		246	246
		246	246
		246	246
		246	246
		246	246
		246	246
		246	246
		246	246
		246	246
		246	246
		246	246
		246	246
		246	246
		246	246
		246	246
		246	246
		246	246
		246	246
		246	246
		246	246
		246	246
		246	246
		246	246
		246	246
		245	245
		245	245
		245	245
		245	245
		245	245
		245	245
		245	245
		245	245
		245	245
		245	245
		245	245
		245	245
		245	245
		245	245
		245	245
		245	245
		245	245
		245	245
		245	245
		244	244
		244	244
		244	244
		244	244
		244	244
		244	244
		244	244
		244	244
		244	244
		244	244
		244	244
		244	244
		244	244
		244	244
		244	244
		244	244
		243	243
		243	243
		243	243
		243	243
		243	243
		243	243
		243	243
		243	243
		243	243
		243	243
		243	243
		243	243
		243	243
		243	243
		243	243
		243	243
		243	243
		242	242
		242	242
		242	242
		242	242
		242	242
		242	242
		242	242
		242	242
		242	242
		242	242
		242	242
		242	242
		242	242
		242	242
		242	242
		242	242
		242	242
		241	241
		241	241
		241	241
		241	241
		241	241
		241	241
		241	241
		241	241
		241	241
		241	241
		241	241
		241	241
		241	241
		241	241
		241	241
		241	241
		240	240
		240	240
		240	240
		240	240
		240	240
		240	240
		240	240
		240	240
		240	240
		240	240
		240	240
		240	240
		240	240
		240	240
		240	240
		240	240
		240	240
		239	239
		239	239
		239	239
		239	239
		239	239
		239	239
		239	239
		239	239
		239	239
		239	239
		239	239
		239	239
		239	239
		239	239
		239	239
		239	239
		239	239
		238	238
		238	238
		238	238
		238	238
		238	238
		238	238
		238	238
		238	238
		238	238
		238	238
		238	238
		238	238
		238	238
		238	238
		238	238
		238	238
		238	238
		238	238
		238	238
		237	237
		237	237
		237	237
		237	237
		237	237
		237	237
		237	237
		237	237
		237	237
		237	237
		237	237
		237	237
		237	237
		237	237
		237	237
		237	237
		237	237
		237	237
		237	237
		237	237
		237	237
		237	237
		237	237
		237	237
		237	237
		237	237
		237	237
		236	236
		236	236
		236	236
		236	236
		236	236
		236	236
		236	236
		236	236
		236	236
		236	236
		236	236
		236	236
		236	236
		236	236
		236	236
		236	236
		236	236
		236	236
		235	235
		235	235
		235	235
		235	235
		235	235
		235	235
		235	235
		235	235
		235	235
		235	235
		235	235
		235	235
		235	235
		235	235
		235	235
		235	235
		235	235
		235	235
		235	235
		235	235
		235	235
		234	234
		234	234
		234	234
		234	234
		234	234
		234	234
		234	234
		234	234
		234	234
		234	234
		234	234
		234	234
		234	234
		234	234
		234	234
		234	234
		234	234
		234	234
		234	234
		234	234
		234	234
		234	234
		234	234
		233	233
		233	233
		233	233
		233	233
		233	233
		233	233
		233	233
		233	233
		233	233
		233	233
		233	233
		233	233
		233	233
		233	233
		233	233
		233	233
		233	233
		232	232
		232	232
		232	232
		232	232
		232	232
		232	232
		232	232
		232	232
		232	232
		232	232
		232	232
		232	232
		232	232
		232	232
		232	232
		232	232
		232	232
		232	232
		232	232
		232	232
		232	232
		231	231
		231	231
		231	231
		231	231
		231	231
		231	231
		231	231
		231	231
		231	231
		231	231
		231	231
		231	231
		231	231
		231	231
		231	231
		231	231
		231	231
		230	230
		230	230
		230	230
		230	230
		230	230
		230	230
		230	230
		230	230
		230	230
		230	230
		230	230
		230	230
		230	230
		230	230
		230	230
		230	230
		230	230
		230	230
		229	229
		229	229
		229	229
		229	229
		229	229
		229	229
		229	229
		229	229
		229	229
		229	229
		229	229
		229	229
		229	229
		229	229
		229	229
		229	229
		229	229
		229	229
		229	229
		229	229
		229	229
		229	229
		229	229
		229	229
		229	229
		228	228
		228	228
		228	228
		228	228
		228	228
		228	228
		228	228
		228	228
		228	228
		228	228
		228	228
		228	228
		228	228
		228	228
		228	228
		228	228
		228	228
		228	228
		228	228
		228	228
		228	228
		228	228
		228	228
		228	228
		228	228
		228	228
		227	227
		227	227
		227	227
		227	227
		227	227
		227	227
		227	227
		227	227
		227	227
		227	227
		227	227
		227	227
		227	227
		227	227
		227	227
		227	227
		227	227
		227	227
		227	227
		227	227
		227	227
		227	227
		227	227
		227	227
		227	227
		227	227
		227	227
		227	227
		227	227
		227	227
		227	227
		227	227
		226	226
		226	226
		226	226
		226	226
		226	226
		226	226
		226	226
		226	226
		226	226
		226	226
		226	226
		226	226
		226	226
		226	226
		226	226
		226	226
		226	226
		226	226
		226	226
		226	226
		226	226
		226	226
		226	226
		226	226
		226	226
		225	225
		225	225
		225	225
		225	225
		225	225
		225	225
		225	225
		225	225
		225	225
		225	225
		225	225
		225	225
		225	225
		225	225
		225	225
		225	225
		225	225
		225	225
		225	225
		225	225
		225	225
		225	225
		225	225
		224	224
		224	224
		224	224
		224	224
		224	224
		224	224
		224	224
		224	224
		224	224
		224	224
		224	224
		224	224
		224	224
		224	224
		224	224
		224	224
		224	224
		223	223
		223	223
		223	223
		223	223
		223	223
		223	223
		223	223
		223	223
		223	223
		223	223
		223	223
		223	223
		223	223
		223	223
		223	223
		223	223
		223	223
		222	222
		222	222
		222	222
		222	222
		222	222
		222	222
		222	222
		222	222
		222	222
		222	222
		222	222
		222	222
		222	222
		222	222
		222	222
		222	222
		222	222
		222	222
		222	222
		222	222
		222	222
		222	222
		222	222
		222	222
		221	221
		221	221
		221	221
		221	221
		221	221
		221	221
		221	221
		221	221
		221	221
		221	221
		221	221
		221	221
		221	221
		221	221
		221	221
		221	221
		221	221
		221	221
		221	221
		221	221
		221	221
		221	221
		221	221
		221	221
		221	221
		221	221
		220	220
		220	220
		220	220
		220	220
		220	220
		220	220
		220	220
		220	220
		220	220
		220	220
		220	220
		220	220
		220	220
		220	220
		220	220
		220	220
		220	220
		220	220
		220	220
		220	220
		220	220
		220	220
		220	220
		220	220
		220	220
		220	220
		220	220
		219	219
		219	219
		219	219
		219	219
		219	219
		219	219
		219	219
		219	219
		219	219
		219	219
		219	219
		219	219
		219	219
		219	219
		219	219
		218	218
		218	218
		218	218
		218	218
		218	218
		218	218
		218	218
		218	218
		218	218
		218	218
		218	218
		218	218
		218	218
		218	218
		218	218
		218	218
		218	218
		218	218
		218	218
		218	218
		218	218
		218	218
		218	218
		218	218
		218	218
		218	218
		218	218
		218	218
		218	218
		218	218
		218	218
		218	218
		218	218
		218	218
		217	217
		217	217
		217	217
		217	217
		217	217
		217	217
		217	217
		217	217
		217	217
		217	217
		217	217
		217	217
		217	217
		217	217
		217	217
		217	217
		217	217
		217	217
		217	217
		217	217
		217	217
		217	217
		217	217
		217	217
		217	217
		217	217
		217	217
		217	217
		217	217
		217	217
		216	216
		216	216
		216	216
		216	216
		216	216
		216	216
		216	216
		216	216
		216	216
		216	216
		216	216
		216	216
		216	216
		216	216
		216	216
		216	216
		216	216
		216	216
		216	216
		216	216
		216	216
		216	216
		216	216
		216	216
		216	216
		216	216
		216	216
		216	216
		216	216
		215	215
		215	215
		215	215
		215	215
		215	215
		215	215
		215	215
		215	215
		215	215
		215	215
		215	215
		215	215
		215	215
		215	215
		215	215
		215	215
		215	215
		215	215
		215	215
		215	215
		215	215
		215	215
		215	215
		215	215
		215	215
		215	215
		215	215
		215	215
		215	215
		215	215
		215	215
		215	215
		215	215
		214	214
		214	214
		214	214
		214	214
		214	214
		214	214
		214	214
		214	214
		214	214
		214	214
		214	214
		214	214
		214	214
		214	214
		214	214
		214	214
		214	214
		214	214
		214	214
		214	214
		214	214
		214	214
		214	214
		214	214
		214	214
		214	214
		214	214
		214	214
		214	214
		214	214
		214	214
		214	214
		213	213
		213	213
		213	213
		213	213
		213	213
		213	213
		213	213
		213	213
		213	213
		213	213
		213	213
		213	213
		213	213
		213	213
		213	213
		213	213
		213	213
		213	213
		213	213
		213	213
		213	213
		213	213
		213	213
		213	213
		213	213
		213	213
		213	213
		213	213
		213	213
		212	212
		212	212
		212	212
		212	212
		212	212
		212	212
		212	212
		212	212
		212	212
		212	212
		212	212
		212	212
		212	212
		212	212
		212	212
		212	212
		212	212
		212	212
		212	212
		212	212
		212	212
		212	212
		212	212
		212	212
		212	212
		212	212
		211	211
		211	211
		211	211
		211	211
		211	211
		211	211
		211	211
		211	211
		211	211
		211	211
		211	211
		211	211
		211	211
		211	211
		211	211
		211	211
		211	211
		211	211
		211	211
		211	211
		211	211
		211	211
		211	211
		211	211
		211	211
		211	211
		211	211
		211	211
		211	211
		211	211
		211	211
		211	211
		211	211
		211	211
		211	211
		211	211
		211	211
		211	211
		211	211
		210	210
		210	210
		210	210
		210	210
		210	210
		210	210
		210	210
		210	210
		210	210
		210	210
		210	210
		210	210
		210	210
		210	210
		210	210
		210	210
		210	210
		210	210
		210	210
		210	210
		210	210
		210	210
		210	210
		210	210
		210	210
		209	209
		209	209
		209	209
		209	209
		209	209
		209	209
		209	209
		209	209
		209	209
		209	209
		209	209
		209	209
		209	209
		209	209
		209	209
		209	209
		209	209
		209	209
		209	209
		209	209
		209	209
		209	209
		209	209
		209	209
		209	209
		209	209
		209	209
		209	209
		209	209
		209	209
		209	209
		208	208
[truncated: 6,002 more rows]

## Sheet: Figure 2-figure supplement 1G
UMIs per cell of recovered cells			Figure 2-figure supplement 1G
CC			The median of UMIs
29571			CC
16122			182
15373
15309
13006
12606
11579
10507
9060
9023
7302
7188
7157
6541
6500
6408
6123
6117
6021
5987
5976
5858
5732
5586
5539
5495
5442
5413
5413
5300
5298
5272
5111
5089
5009
5005
4984
4968
4962
4911
4847
4685
4678
4669
4640
4598
4584
4522
4455
4453
4423
4418
4366
4362
4337
4283
4234
4229
4183
4150
4146
4146
4140
4116
4114
4111
4101
4066
4027
4006
3999
3984
3965
3958
3927
3922
3908
3897
3877
3870
3840
3827
3819
3806
3800
3796
3795
3786
3757
3748
3740
3726
3717
3716
3708
3683
3673
3661
3655
3655
3650
3641
3625
3621
3605
3603
3590
3589
3589
3585
3582
3566
3532
3531
3516
3513
3513
3507
3506
3503
3495
3490
3480
3468
3466
3453
3420
3416
3399
3382
3379
3378
3373
3372
3365
3353
3352
3347
3345
3340
3340
3336
3333
3321
3311
3307
3301
3301
3286
3276
3271
3268
3260
3247
3246
3239
3233
3226
3213
3191
3187
3174
3171
3170
3167
3163
3146
3146
3138
3130
3120
3119
3111
3110
3106
3098
3084
3072
3070
3065
3065
3059
3050
3049
3047
3040
3037
3029
3022
3015
3010
3007
3005
3001
3000
3000
2989
2984
2977
2970
2969
2965
2959
2946
2943
2928
2913
2901
2901
2901
2900
2900
2896
2893
2893
2887
2885
2878
2872
2871
2869
2868
2860
2859
2854
2851
2850
2849
2843
2842
2841
2841
2839
2837
2836
2835
2831
2829
2825
2817
2816
2814
2809
2807
2797
2789
2784
2784
2779
2778
2776
2775
2772
2762
2761
2756
2750
2750
2745
2739
2738
2716
2715
2714
2711
2710
2710
2709
2705
2704
2703
2700
2699
2698
2691
2688
2676
2667
2667
2663
2663
2656
2653
2652
2649
2647
2644
2642
2641
2639
2637
2635
2634
2631
2629
2624
2624
2620
2620
2617
2612
2603
2603
2602
2600
2596
2593
2591
2589
2589
2582
2580
2580
2579
2578
2573
2572
2568
2561
2558
2558
2557
2552
2551
2549
2546
2542
2540
2539
2535
2535
2532
2531
2529
2529
2525
2523
2518
2508
2506
2505
2504
2502
2499
2495
2495
2491
2490
2490
2489
2487
2486
2485
2484
2483
2481
2481
2475
2474
2473
2470
2470
2468
2468
2464
2463
2460
2453
2448
2447
2445
2444
2444
2443
2442
2438
2436
2433
2433
2428
2424
2423
2416
2415
2414
2413
2412
2392
2390
2386
2385
2380
2380
2379
2377
2376
2375
2371
2370
2366
2364
2363
2363
2360
2358
2358
2352
2351
2350
2349
2349
2349
2348
2347
2342
2339
2338
2335
2335
2334
2331
2329
2322
2319
2319
2319
2314
2312
2308
2305
2303
2303
2300
2297
2293
2293
2293
2293
2292
2290
2290
2287
2287
2286
2286
2284
2282
2281
2280
2279
2274
2274
2272
2272
2268
2267
2267
2266
2263
2263
2263
2262
2261
2259
2248
2247
2246
2242
2240
2238
2233
2230
2228
2228
2226
2223
2223
2220
2219
2219
2219
2218
2217
2213
2212
2211
2208
2207
2204
2203
2202
2201
2199
2198
2197
2197
2195
2194
2193
2190
2189
2188
2188
2180
2180
2175
2174
2173
2171
2169
2169
2166
2164
2163
2163
2162
2162
2159
2158
2153
2150
2148
2148
2146
2144
2144
2143
2143
2139
2138
2138
2134
2134
2133
2131
2131
2126
2123
2120
2120
2117
2116
2114
2113
2110
2105
2103
2102
2097
2093
2089
2088
2085
2084
2080
2078
2077
2077
2075
2074
2072
2070
2070
2069
2069
2069
2067
2066
2065
2063
2062
2062
2059
2059
2059
2059
2057
2057
2054
2053
2053
2052
2046
2045
2044
2041
2041
2040
2040
2040
2039
2039
2037
2036
2033
2033
2032
2030
2028
2027
2023
2023
2018
2017
2016
2015
2013
2012
2010
2006
2006
2005
2005
2004
2003
1999
1999
1997
1997
1996
1996
1994
1991
1990
1990
1988
1986
1983
1981
1979
1978
1977
1975
1974
1974
1973
1972
1971
1969
1968
1967
1966
1965
1964
1962
1961
1959
1959
1958
1958
1957
1957
1957
1957
1954
1952
1951
1948
1948
1946
1945
1944
1941
1940
1940
1937
1935
1935
1935
1933
1932
1932
1931
1931
1930
1929
1927
1925
1924
1922
1922
1921
1919
1919
1917
1914
1914
1912
1911
1910
1910
1909
1907
1907
1906
1906
1906
1904
1901
1899
1898
1898
1897
1894
1891
1891
1890
1889
1889
1889
1884
1883
1883
1882
1881
1879
1877
1877
1876
1875
1875
1873
1873
1873
1872
1871
1868
1867
1866
1866
1863
1862
1862
1862
1859
1858
1858
1857
1856
1856
1855
1855
1854
1853
1852
1852
1851
1851
1850
1848
1846
1844
1842
1842
1842
1840
1837
1836
1835
1835
1835
1834
1832
1831
1830
1829
1829
1827
1826
1825
1824
1821
1816
1815
1815
1813
1813
1812
1811
1811
1810
1810
1809
1808
1808
1808
1808
1808
1807
1807
1807
1806
1806
1805
1803
1802
1801
1800
1799
1798
1797
1797
1796
1795
1793
1793
1793
1793
1793
1792
1792
1791
1791
1791
1790
1787
1785
1784
1783
1781
1778
1778
1777
1775
1775
1774
1772
1772
1771
1769
1769
1768
1768
1764
1764
1764
1762
1761
1760
1760
1757
1754
1754
1752
1752
1751
1748
1748
1748
1746
1745
1745
1743
1742
1741
1740
1740
1739
1738
1737
1737
1736
1736
1735
1733
1732
1732
1732
1730
1730
1729
1728
1726
1724
1722
1721
1721
1721
1720
1720
1719
1719
1718
1717
1716
1715
1715
1711
1708
1707
1707
1706
1706
1705
1705
1704
1702
1701
1700
1700
1700
1699
1699
1698
1698
1697
1697
1696
1695
1695
1694
1694
1692
1692
1689
1688
1688
1686
1685
1685
1685
1685
1684
1683
1682
1681
1681
1678
1677
1677
1676
1675
1675
1675
1674
1674
1670
1666
1666
1666
1665
1664
1663
1662
1662
1662
1660
1658
1657
1657
1656
1656
1656
1654
1654
1653
1653
1653
1652
1652
1651
1650
1649
1648
1648
1648
1647
1646
1645
1645
1644
1640
1639
1638
1637
1637
1634
1634
1634
1633
1632
1632
1632
1631
1631
1631
1629
1629
1627
1625
1623
1623
1622
1622
1621
1620
1620
1619
1619
1617
1612
1611
1611
1610
1610
1610
1608
1607
1607
1607
1606
1606
1605
1604
1604
1604
1603
1603
1601
1601
1600
1599
1599
1599
1598
1597
1596
1596
1596
1595
1593
1593
1592
1588
1588
1588
1588
1584
1583
1583
1583
1582
1582
1580
1577
1576
1576
1575
1575
1575
1572
1571
1570
1570
1568
1567
1566
1566
1566
1566
1563
1563
1562
1562
1560
1560
1559
1559
1558
1557
1556
1556
1556
1555
1555
1555
1554
1554
1554
1552
1551
1551
1549
1549
1548
1548
1548
1547
1546
1545
1544
1544
1542
1541
1539
1536
1536
1535
1534
1533
1533
1532
1529
1529
1529
1528
1527
1526
1526
1526
1526
1523
1523
1523
1522
1521
1521
1521
1520
1519
1519
1519
1517
1516
1515
1515
1515
1514
1514
1514
1513
1513
1513
1512
1512
1511
1508
1507
1506
1505
1505
1505
1505
1502
1502
1500
1499
1499
1495
1493
1492
1490
1490
1488
1487
1487
1487
1487
1486
1485
1485
1484
1482
1482
1481
1480
1480
1480
1479
1479
1479
1476
1475
1475
1473
1471
1471
1470
1469
1467
1467
1467
1467
1466
1466
1465
1464
1464
1464
1462
1462
1462
1461
1460
1458
1458
1458
1455
1455
1454
1454
1454
1453
1453
1453
1451
1450
1448
1447
1447
1447
1446
1444
1443
1443
1440
1439
1439
1438
1438
1437
1436
1436
1435
1434
1434
1433
1432
1432
1431
1431
1431
1431
1431
1430
1430
1429
1428
1428
1427
1427
1427
1427
1425
1425
1425
1424
1423
1423
1421
1421
1421
1420
1420
1420
1420
1419
1419
1418
1417
1417
1417
1416
1416
1416
1415
1415
1414
1413
1411
1409
1408
1407
1407
1406
1404
1404
1403
1402
1401
1400
1399
1399
1397
1397
1396
1396
1393
1393
1391
1390
1389
1388
1388
1387
1384
1382
1382
1380
1380
1378
1377
1376
1375
1375
1373
1372
1371
1369
1369
1368
1365
1363
1363
1362
1361
1361
1361
1361
1359
1359
1358
1357
1357
1355
1355
1354
1352
1350
1349
1348
1348
1348
1347
1347
1346
1346
1346
1346
1344
1340
1338
1337
1337
1337
1337
1336
1336
1335
1335
1331
1331
1330
1329
1329
1329
1328
1327
1326
1325
1325
1324
1323
1322
1322
1321
1320
1320
1319
1319
1317
1316
1315
1315
1314
1314
1314
1313
1312
1309
1307
1306
1305
1305
1304
1303
1303
1302
1301
1301
1301
1301
1301
1300
1300
1298
1297
1297
1296
1296
1295
1294
1294
1294
1294
1293
1293
1292
1291
1291
1290
1289
1289
1288
1287
1286
1286
1285
1285
1284
1284
1283
1283
1283
1282
1281
1280
1280
1280
1279
1279
1279
1278
1278
1277
1276
1276
1276
1275
1275
1274
1274
1272
1272
1271
1270
1270
1270
1269
1268
1267
1267
1267
1267
1266
1266
1265
1265
1264
1264
1263
1263
1263
1262
1262
1260
1260
1259
1259
1258
1258
1256
1256
1256
1254
1253
1252
1252
1251
1250
1249
1249
1247
1246
1246
1244
1242
1242
1241
1241
1241
1241
1239
1239
1239
1239
1237
1237
1237
1236
1236
1236
1236
1236
1235
1235
1235
1235
1234
1233
1232
1231
1231
1230
1230
1230
1227
1227
1227
1226
1226
1226
1225
1225
1225
1224
1224
1223
1222
1221
1221
1221
1219
1218
1218
1218
1217
1217
1217
1216
1215
1215
1214
1213
1211
1211
1210
1210
1209
1209
1209
1206
1206
1205
1205
1204
1203
1203
1202
1202
1202
1200
1200
1198
1197
1197
1196
1196
1195
1195
1195
1192
1192
1192
1192
1191
1191
1190
1190
1189
1188
1188
1188
1188
1187
1186
1185
1185
1185
1182
1180
1179
1179
1178
1175
1174
1174
1172
1171
1170
1169
1169
1169
1168
1168
1166
1166
1165
1165
1165
1164
1164
1163
1162
1162
1162
1161
1160
1159
1159
1158
1158
1157
1155
1155
1154
1152
1152
1150
1150
1150
1147
1147
1147
1145
1145
1144
1143
1143
1142
1140
1140
1138
1138
1137
1137
1136
1135
1134
1134
1134
1133
1132
1132
1132
1132
1131
1131
1129
1129
1129
1129
1128
1128
1128
1127
1126
1125
1125
1125
1124
1124
1124
1124
1123
1123
1122
1122
1122
1121
1121
1120
1118
1118
1115
1115
1115
1114
1111
1110
1109
1109
1108
1107
1107
1106
1104
1104
1104
1104
1103
1103
1102
1102
1101
1101
1101
1101
1101
1100
1097
1096
1095
1095
1094
1093
1093
1093
1092
1091
1090
1090
1090
1089
1088
1088
1086
1085
1085
1085
1084
1084
1084
1084
1083
1080
1080
1079
1078
1076
1076
1075
1074
1073
1072
1072
1071
1069
1069
1068
1068
1067
1066
1066
1065
1064
1064
1064
1062
1062
1062
1062
1061
1061
1060
1057
1057
1057
1056
1056
1055
1055
1053
1051
1049
1049
1049
1048
1046
1045
1045
1044
1044
1042
1042
1042
1042
1041
1041
1041
1040
1040
1040
1040
1039
1039
1038
1036
1036
1035
1035
1034
1033
1033
1032
1031
1031
1030
1030
1029
1029
1028
1028
1028
1027
1026
1026
1023
1023
1022
1020
1020
1020
1019
1018
1017
1017
1016
1015
1015
1014
1014
1013
1012
1011
1009
1009
1007
1007
1007
1006
1004
1004
1002
1001
1001
1000
997
995
995
995
994
994
992
992
991
991
991
990
989
989
989
988
988
986
985
985
984
983
980
979
978
978
976
976
976
975
973
973
973
973
973
972
972
971
971
971
970
969
969
968
968
968
968
968
968
967
967
966
966
966
966
964
964
964
964
963
963
962
961
961
961
960
960
959
959
959
959
958
958
958
958
956
956
956
955
954
954
954
954
954
953
953
953
953
951
951
951
951
951
950
950
950
949
948
947
947
946
945
945
945
944
944
943
942
942
941
941
941
941
941
939
938
938
937
936
936
936
936
935
934
934
934
934
934
933
933
932
931
931
931
930
930
929
929
929
926
926
926
923
923
921
921
921
920
920
919
919
[truncated: 11,899 more rows]

## Sheet: Figure 2-figure supplement 1H
Data of UMIs	RiboD-PETRI of CC					Figure 2-figure supplement 1H
	Top 1000	Top 5000	Top 10000			The median of UMIs
	29571	29571	29571			Top 1000	Top 5000	Top 10000
	16122	16122	16122			2190	662	225
	15373	15373	15373
	15309	15309	15309
	13006	13006	13006
	12606	12606	12606
	11579	11579	11579
	10507	10507	10507
	9060	9060	9060
	9023	9023	9023
	7302	7302	7302
	7188	7188	7188
	7157	7157	7157
	6541	6541	6541
	6500	6500	6500
	6408	6408	6408
	6123	6123	6123
	6117	6117	6117
	6021	6021	6021
	5987	5987	5987
	5976	5976	5976
	5858	5858	5858
	5732	5732	5732
	5586	5586	5586
	5539	5539	5539
	5495	5495	5495
	5442	5442	5442
	5413	5413	5413
	5413	5413	5413
	5300	5300	5300
	5298	5298	5298
	5272	5272	5272
	5111	5111	5111
	5089	5089	5089
	5009	5009	5009
	5005	5005	5005
	4984	4984	4984
	4968	4968	4968
	4962	4962	4962
	4911	4911	4911
	4847	4847	4847
	4685	4685	4685
	4678	4678	4678
	4669	4669	4669
	4640	4640	4640
	4598	4598	4598
	4584	4584	4584
	4522	4522	4522
	4455	4455	4455
	4453	4453	4453
	4423	4423	4423
	4418	4418	4418
	4366	4366	4366
	4362	4362	4362
	4337	4337	4337
	4283	4283	4283
	4234	4234	4234
	4229	4229	4229
	4183	4183	4183
	4150	4150	4150
	4146	4146	4146
	4146	4146	4146
	4140	4140	4140
	4116	4116	4116
	4114	4114	4114
	4111	4111	4111
	4101	4101	4101
	4066	4066	4066
	4027	4027	4027
	4006	4006	4006
	3999	3999	3999
	3984	3984	3984
	3965	3965	3965
	3958	3958	3958
	3927	3927	3927
	3922	3922	3922
	3908	3908	3908
	3897	3897	3897
	3877	3877	3877
	3870	3870	3870
	3840	3840	3840
	3827	3827	3827
	3819	3819	3819
	3806	3806	3806
	3800	3800	3800
	3796	3796	3796
	3795	3795	3795
	3786	3786	3786
	3757	3757	3757
	3748	3748	3748
	3740	3740	3740
	3726	3726	3726
	3717	3717	3717
	3716	3716	3716
	3708	3708	3708
	3683	3683	3683
	3673	3673	3673
	3661	3661	3661
	3655	3655	3655
	3655	3655	3655
	3650	3650	3650
	3641	3641	3641
	3625	3625	3625
	3621	3621	3621
	3605	3605	3605
	3603	3603	3603
	3590	3590	3590
	3589	3589	3589
	3589	3589	3589
	3585	3585	3585
	3582	3582	3582
	3566	3566	3566
	3532	3532	3532
	3531	3531	3531
	3516	3516	3516
	3513	3513	3513
	3513	3513	3513
	3507	3507	3507
	3506	3506	3506
	3503	3503	3503
	3495	3495	3495
	3490	3490	3490
	3480	3480	3480
	3468	3468	3468
	3466	3466	3466
	3453	3453	3453
	3420	3420	3420
	3416	3416	3416
	3399	3399	3399
	3382	3382	3382
	3379	3379	3379
	3378	3378	3378
	3373	3373	3373
	3372	3372	3372
	3365	3365	3365
	3353	3353	3353
	3352	3352	3352
	3347	3347	3347
	3345	3345	3345
	3340	3340	3340
	3340	3340	3340
	3336	3336	3336
	3333	3333	3333
	3321	3321	3321
	3311	3311	3311
	3307	3307	3307
	3301	3301	3301
	3301	3301	3301
	3286	3286	3286
	3276	3276	3276
	3271	3271	3271
	3268	3268	3268
	3260	3260	3260
	3247	3247	3247
	3246	3246	3246
	3239	3239	3239
	3233	3233	3233
	3226	3226	3226
	3213	3213	3213
	3191	3191	3191
	3187	3187	3187
	3174	3174	3174
	3171	3171	3171
	3170	3170	3170
	3167	3167	3167
	3163	3163	3163
	3146	3146	3146
	3146	3146	3146
	3138	3138	3138
	3130	3130	3130
	3120	3120	3120
	3119	3119	3119
	3111	3111	3111
	3110	3110	3110
	3106	3106	3106
	3098	3098	3098
	3084	3084	3084
	3072	3072	3072
	3070	3070	3070
	3065	3065	3065
	3065	3065	3065
	3059	3059	3059
	3050	3050	3050
	3049	3049	3049
	3047	3047	3047
	3040	3040	3040
	3037	3037	3037
	3029	3029	3029
	3022	3022	3022
	3015	3015	3015
	3010	3010	3010
	3007	3007	3007
	3005	3005	3005
	3001	3001	3001
	3000	3000	3000
	3000	3000	3000
	2989	2989	2989
	2984	2984	2984
	2977	2977	2977
	2970	2970	2970
	2969	2969	2969
	2965	2965	2965
	2959	2959	2959
	2946	2946	2946
	2943	2943	2943
	2928	2928	2928
	2913	2913	2913
	2901	2901	2901
	2901	2901	2901
	2901	2901	2901
	2900	2900	2900
	2900	2900	2900
	2896	2896	2896
	2893	2893	2893
	2893	2893	2893
	2887	2887	2887
	2885	2885	2885
	2878	2878	2878
	2872	2872	2872
	2871	2871	2871
	2869	2869	2869
	2868	2868	2868
	2860	2860	2860
	2859	2859	2859
	2854	2854	2854
	2851	2851	2851
	2850	2850	2850
	2849	2849	2849
	2843	2843	2843
	2842	2842	2842
	2841	2841	2841
	2841	2841	2841
	2839	2839	2839
	2837	2837	2837
	2836	2836	2836
	2835	2835	2835
	2831	2831	2831
	2829	2829	2829
	2825	2825	2825
	2817	2817	2817
	2816	2816	2816
	2814	2814	2814
	2809	2809	2809
	2807	2807	2807
	2797	2797	2797
	2789	2789	2789
	2784	2784	2784
	2784	2784	2784
	2779	2779	2779
	2778	2778	2778
	2776	2776	2776
	2775	2775	2775
	2772	2772	2772
	2762	2762	2762
	2761	2761	2761
	2756	2756	2756
	2750	2750	2750
	2750	2750	2750
	2745	2745	2745
	2739	2739	2739
	2738	2738	2738
	2716	2716	2716
	2715	2715	2715
	2714	2714	2714
	2711	2711	2711
	2710	2710	2710
	2710	2710	2710
	2709	2709	2709
	2705	2705	2705
	2704	2704	2704
	2703	2703	2703
	2700	2700	2700
	2699	2699	2699
	2698	2698	2698
	2691	2691	2691
	2688	2688	2688
	2676	2676	2676
	2667	2667	2667
	2667	2667	2667
	2663	2663	2663
	2663	2663	2663
	2656	2656	2656
	2653	2653	2653
	2652	2652	2652
	2649	2649	2649
	2647	2647	2647
	2644	2644	2644
	2642	2642	2642
	2641	2641	2641
	2639	2639	2639
	2637	2637	2637
	2635	2635	2635
	2634	2634	2634
	2631	2631	2631
	2629	2629	2629
	2624	2624	2624
	2624	2624	2624
	2620	2620	2620
	2620	2620	2620
	2617	2617	2617
	2612	2612	2612
	2603	2603	2603
	2603	2603	2603
	2602	2602	2602
	2600	2600	2600
	2596	2596	2596
	2593	2593	2593
	2591	2591	2591
	2589	2589	2589
	2589	2589	2589
	2582	2582	2582
	2580	2580	2580
	2580	2580	2580
	2579	2579	2579
	2578	2578	2578
	2573	2573	2573
	2572	2572	2572
	2568	2568	2568
	2561	2561	2561
	2558	2558	2558
	2558	2558	2558
	2557	2557	2557
	2552	2552	2552
	2551	2551	2551
	2549	2549	2549
	2546	2546	2546
	2542	2542	2542
	2540	2540	2540
	2539	2539	2539
	2535	2535	2535
	2535	2535	2535
	2532	2532	2532
	2531	2531	2531
	2529	2529	2529
	2529	2529	2529
	2525	2525	2525
	2523	2523	2523
	2518	2518	2518
	2508	2508	2508
	2506	2506	2506
	2505	2505	2505
	2504	2504	2504
	2502	2502	2502
	2499	2499	2499
	2495	2495	2495
	2495	2495	2495
	2491	2491	2491
	2490	2490	2490
	2490	2490	2490
	2489	2489	2489
	2487	2487	2487
	2486	2486	2486
	2485	2485	2485
	2484	2484	2484
	2483	2483	2483
	2481	2481	2481
	2481	2481	2481
	2475	2475	2475
	2474	2474	2474
	2473	2473	2473
	2470	2470	2470
	2470	2470	2470
	2468	2468	2468
	2468	2468	2468
	2464	2464	2464
	2463	2463	2463
	2460	2460	2460
	2453	2453	2453
	2448	2448	2448
	2447	2447	2447
	2445	2445	2445
	2444	2444	2444
	2444	2444	2444
	2443	2443	2443
	2442	2442	2442
	2438	2438	2438
	2436	2436	2436
	2433	2433	2433
	2433	2433	2433
	2428	2428	2428
	2424	2424	2424
	2423	2423	2423
	2416	2416	2416
	2415	2415	2415
	2414	2414	2414
	2413	2413	2413
	2412	2412	2412
	2392	2392	2392
	2390	2390	2390
	2386	2386	2386
	2385	2385	2385
	2380	2380	2380
	2380	2380	2380
	2379	2379	2379
	2377	2377	2377
	2376	2376	2376
	2375	2375	2375
	2371	2371	2371
	2370	2370	2370
	2366	2366	2366
	2364	2364	2364
	2363	2363	2363
	2363	2363	2363
	2360	2360	2360
	2358	2358	2358
	2358	2358	2358
	2352	2352	2352
	2351	2351	2351
	2350	2350	2350
	2349	2349	2349
	2349	2349	2349
	2349	2349	2349
	2348	2348	2348
	2347	2347	2347
	2342	2342	2342
	2339	2339	2339
	2338	2338	2338
	2335	2335	2335
	2335	2335	2335
	2334	2334	2334
	2331	2331	2331
	2329	2329	2329
	2322	2322	2322
	2319	2319	2319
	2319	2319	2319
	2319	2319	2319
	2314	2314	2314
	2312	2312	2312
	2308	2308	2308
	2305	2305	2305
	2303	2303	2303
	2303	2303	2303
	2300	2300	2300
	2297	2297	2297
	2293	2293	2293
	2293	2293	2293
	2293	2293	2293
	2293	2293	2293
	2292	2292	2292
	2290	2290	2290
	2290	2290	2290
	2287	2287	2287
	2287	2287	2287
	2286	2286	2286
	2286	2286	2286
	2284	2284	2284
	2282	2282	2282
	2281	2281	2281
	2280	2280	2280
	2279	2279	2279
	2274	2274	2274
	2274	2274	2274
	2272	2272	2272
	2272	2272	2272
	2268	2268	2268
	2267	2267	2267
	2267	2267	2267
	2266	2266	2266
	2263	2263	2263
	2263	2263	2263
	2263	2263	2263
	2262	2262	2262
	2261	2261	2261
	2259	2259	2259
	2248	2248	2248
	2247	2247	2247
	2246	2246	2246
	2242	2242	2242
	2240	2240	2240
	2238	2238	2238
	2233	2233	2233
	2230	2230	2230
	2228	2228	2228
	2228	2228	2228
	2226	2226	2226
	2223	2223	2223
	2223	2223	2223
	2220	2220	2220
	2219	2219	2219
	2219	2219	2219
	2219	2219	2219
	2218	2218	2218
	2217	2217	2217
	2213	2213	2213
	2212	2212	2212
	2211	2211	2211
	2208	2208	2208
	2207	2207	2207
	2204	2204	2204
	2203	2203	2203
	2202	2202	2202
	2201	2201	2201
	2199	2199	2199
	2198	2198	2198
	2197	2197	2197
	2197	2197	2197
	2195	2195	2195
	2194	2194	2194
	2193	2193	2193
	2190	2190	2190
	2189	2189	2189
	2188	2188	2188
	2188	2188	2188
	2180	2180	2180
	2180	2180	2180
	2175	2175	2175
	2174	2174	2174
	2173	2173	2173
	2171	2171	2171
	2169	2169	2169
	2169	2169	2169
	2166	2166	2166
	2164	2164	2164
	2163	2163	2163
	2163	2163	2163
	2162	2162	2162
	2162	2162	2162
	2159	2159	2159
	2158	2158	2158
	2153	2153	2153
	2150	2150	2150
	2148	2148	2148
	2148	2148	2148
	2146	2146	2146
	2144	2144	2144
	2144	2144	2144
	2143	2143	2143
	2143	2143	2143
	2139	2139	2139
	2138	2138	2138
	2138	2138	2138
	2134	2134	2134
	2134	2134	2134
	2133	2133	2133
	2131	2131	2131
	2131	2131	2131
	2126	2126	2126
	2123	2123	2123
	2120	2120	2120
	2120	2120	2120
	2117	2117	2117
	2116	2116	2116
	2114	2114	2114
	2113	2113	2113
	2110	2110	2110
	2105	2105	2105
	2103	2103	2103
	2102	2102	2102
	2097	2097	2097
	2093	2093	2093
	2089	2089	2089
	2088	2088	2088
	2085	2085	2085
	2084	2084	2084
	2080	2080	2080
	2078	2078	2078
	2077	2077	2077
	2077	2077	2077
	2075	2075	2075
	2074	2074	2074
	2072	2072	2072
	2070	2070	2070
	2070	2070	2070
	2069	2069	2069
	2069	2069	2069
	2069	2069	2069
	2067	2067	2067
	2066	2066	2066
	2065	2065	2065
	2063	2063	2063
	2062	2062	2062
	2062	2062	2062
	2059	2059	2059
	2059	2059	2059
	2059	2059	2059
	2059	2059	2059
	2057	2057	2057
	2057	2057	2057
	2054	2054	2054
	2053	2053	2053
	2053	2053	2053
	2052	2052	2052
	2046	2046	2046
	2045	2045	2045
	2044	2044	2044
	2041	2041	2041
	2041	2041	2041
	2040	2040	2040
	2040	2040	2040
	2040	2040	2040
	2039	2039	2039
	2039	2039	2039
	2037	2037	2037
	2036	2036	2036
	2033	2033	2033
	2033	2033	2033
	2032	2032	2032
	2030	2030	2030
	2028	2028	2028
	2027	2027	2027
	2023	2023	2023
	2023	2023	2023
	2018	2018	2018
	2017	2017	2017
	2016	2016	2016
	2015	2015	2015
	2013	2013	2013
	2012	2012	2012
	2010	2010	2010
	2006	2006	2006
	2006	2006	2006
	2005	2005	2005
	2005	2005	2005
	2004	2004	2004
	2003	2003	2003
	1999	1999	1999
	1999	1999	1999
	1997	1997	1997
	1997	1997	1997
	1996	1996	1996
	1996	1996	1996
	1994	1994	1994
	1991	1991	1991
	1990	1990	1990
	1990	1990	1990
	1988	1988	1988
	1986	1986	1986
	1983	1983	1983
	1981	1981	1981
	1979	1979	1979
	1978	1978	1978
	1977	1977	1977
	1975	1975	1975
	1974	1974	1974
	1974	1974	1974
	1973	1973	1973
	1972	1972	1972
	1971	1971	1971
	1969	1969	1969
	1968	1968	1968
	1967	1967	1967
	1966	1966	1966
	1965	1965	1965
	1964	1964	1964
	1962	1962	1962
	1961	1961	1961
	1959	1959	1959
	1959	1959	1959
	1958	1958	1958
	1958	1958	1958
	1957	1957	1957
	1957	1957	1957
	1957	1957	1957
	1957	1957	1957
	1954	1954	1954
	1952	1952	1952
	1951	1951	1951
	1948	1948	1948
	1948	1948	1948
	1946	1946	1946
	1945	1945	1945
	1944	1944	1944
	1941	1941	1941
	1940	1940	1940
	1940	1940	1940
	1937	1937	1937
	1935	1935	1935
	1935	1935	1935
	1935	1935	1935
	1933	1933	1933
	1932	1932	1932
	1932	1932	1932
	1931	1931	1931
	1931	1931	1931
	1930	1930	1930
	1929	1929	1929
	1927	1927	1927
	1925	1925	1925
	1924	1924	1924
	1922	1922	1922
	1922	1922	1922
	1921	1921	1921
	1919	1919	1919
	1919	1919	1919
	1917	1917	1917
	1914	1914	1914
	1914	1914	1914
	1912	1912	1912
	1911	1911	1911
	1910	1910	1910
	1910	1910	1910
	1909	1909	1909
	1907	1907	1907
	1907	1907	1907
	1906	1906	1906
	1906	1906	1906
	1906	1906	1906
	1904	1904	1904
	1901	1901	1901
	1899	1899	1899
	1898	1898	1898
	1898	1898	1898
	1897	1897	1897
	1894	1894	1894
	1891	1891	1891
	1891	1891	1891
	1890	1890	1890
	1889	1889	1889
	1889	1889	1889
	1889	1889	1889
	1884	1884	1884
	1883	1883	1883
	1883	1883	1883
	1882	1882	1882
	1881	1881	1881
	1879	1879	1879
	1877	1877	1877
	1877	1877	1877
	1876	1876	1876
	1875	1875	1875
	1875	1875	1875
	1873	1873	1873
	1873	1873	1873
	1873	1873	1873
	1872	1872	1872
	1871	1871	1871
	1868	1868	1868
	1867	1867	1867
	1866	1866	1866
	1866	1866	1866
	1863	1863	1863
	1862	1862	1862
	1862	1862	1862
	1862	1862	1862
	1859	1859	1859
	1858	1858	1858
	1858	1858	1858
	1857	1857	1857
	1856	1856	1856
	1856	1856	1856
	1855	1855	1855
	1855	1855	1855
	1854	1854	1854
	1853	1853	1853
	1852	1852	1852
	1852	1852	1852
	1851	1851	1851
	1851	1851	1851
	1850	1850	1850
	1848	1848	1848
	1846	1846	1846
	1844	1844	1844
	1842	1842	1842
	1842	1842	1842
	1842	1842	1842
	1840	1840	1840
	1837	1837	1837
	1836	1836	1836
	1835	1835	1835
	1835	1835	1835
	1835	1835	1835
	1834	1834	1834
	1832	1832	1832
	1831	1831	1831
	1830	1830	1830
	1829	1829	1829
	1829	1829	1829
	1827	1827	1827
	1826	1826	1826
	1825	1825	1825
	1824	1824	1824
	1821	1821	1821
	1816	1816	1816
	1815	1815	1815
	1815	1815	1815
	1813	1813	1813
	1813	1813	1813
	1812	1812	1812
	1811	1811	1811
	1811	1811	1811
	1810	1810	1810
	1810	1810	1810
	1809	1809	1809
	1808	1808	1808
	1808	1808	1808
	1808	1808	1808
	1808	1808	1808
	1808	1808	1808
	1807	1807	1807
	1807	1807	1807
	1807	1807	1807
	1806	1806	1806
	1806	1806	1806
	1805	1805	1805
	1803	1803	1803
	1802	1802	1802
	1801	1801	1801
	1800	1800	1800
	1799	1799	1799
	1798	1798	1798
	1797	1797	1797
	1797	1797	1797
	1796	1796	1796
	1795	1795	1795
	1793	1793	1793
	1793	1793	1793
	1793	1793	1793
	1793	1793	1793
	1793	1793	1793
	1792	1792	1792
	1792	1792	1792
	1791	1791	1791
	1791	1791	1791
	1791	1791	1791
	1790	1790	1790
	1787	1787	1787
	1785	1785	1785
	1784	1784	1784
	1783	1783	1783
	1781	1781	1781
	1778	1778	1778
	1778	1778	1778
	1777	1777	1777
	1775	1775	1775
	1775	1775	1775
	1774	1774	1774
	1772	1772	1772
	1772	1772	1772
	1771	1771	1771
	1769	1769	1769
	1769	1769	1769
	1768	1768	1768
	1768	1768	1768
	1764	1764	1764
	1764	1764	1764
	1764	1764	1764
	1762	1762	1762
	1761	1761	1761
	1760	1760	1760
	1760	1760	1760
	1757	1757	1757
	1754	1754	1754
	1754	1754	1754
	1752	1752	1752
	1752	1752	1752
	1751	1751	1751
	1748	1748	1748
	1748	1748	1748
	1748	1748	1748
	1746	1746	1746
	1745	1745	1745
	1745	1745	1745
	1743	1743	1743
	1742	1742	1742
	1741	1741	1741
	1740	1740	1740
	1740	1740	1740
	1739	1739	1739
	1738	1738	1738
	1737	1737	1737
	1737	1737	1737
	1736	1736	1736
	1736	1736	1736
	1735	1735	1735
	1733	1733	1733
	1732	1732	1732
	1732	1732	1732
	1732	1732	1732
	1730	1730	1730
	1730	1730	1730
	1729	1729	1729
	1728	1728	1728
	1726	1726	1726
	1724	1724	1724
	1722	1722	1722
	1721	1721	1721
	1721	1721	1721
	1721	1721	1721
	1720	1720	1720
	1720	1720	1720
	1719	1719	1719
	1719	1719	1719
	1718	1718	1718
	1717	1717	1717
	1716	1716	1716
	1715	1715	1715
	1715	1715	1715
	1711	1711	1711
	1708	1708	1708
	1707	1707	1707
	1707	1707	1707
	1706	1706	1706
	1706	1706	1706
	1705	1705	1705
	1705	1705	1705
	1704	1704	1704
	1702	1702	1702
	1701	1701	1701
	1700	1700	1700
	1700	1700	1700
	1700	1700	1700
	1699	1699	1699
	1699	1699	1699
	1698	1698	1698
	1698	1698	1698
	1697	1697	1697
	1697	1697	1697
	1696	1696	1696
	1695	1695	1695
	1695	1695	1695
	1694	1694	1694
	1694	1694	1694
	1692	1692	1692
	1692	1692	1692
	1689	1689	1689
	1688	1688	1688
	1688	1688	1688
	1686	1686	1686
	1685	1685	1685
	1685	1685	1685
	1685	1685	1685
	1685	1685	1685
	1684	1684	1684
	1683	1683	1683
	1682	1682	1682
	1681	1681	1681
	1681	1681	1681
	1678	1678	1678
	1677	1677	1677
	1677	1677	1677
	1676	1676	1676
	1675	1675	1675
	1675	1675	1675
	1675	1675	1675
	1674	1674	1674
	1674	1674	1674
	1670	1670	1670
	1666	1666	1666
	1666	1666	1666
	1666	1666	1666
	1665	1665	1665
	1664	1664	1664
	1663	1663	1663
	1662	1662	1662
	1662	1662	1662
	1662	1662	1662
	1660	1660	1660
	1658	1658	1658
	1657	1657	1657
	1657	1657	1657
	1656	1656	1656
	1656	1656	1656
	1656	1656	1656
	1654	1654	1654
	1654	1654	1654
	1653	1653	1653
	1653	1653	1653
	1653	1653	1653
	1652	1652	1652
	1652	1652	1652
	1651	1651	1651
	1650	1650	1650
	1649	1649	1649
	1648	1648	1648
	1648	1648	1648
	1648	1648	1648
	1647	1647	1647
	1646	1646	1646
	1645	1645	1645
	1645	1645	1645
	1644	1644	1644
	1640	1640	1640
	1639	1639	1639
	1638	1638	1638
	1637	1637	1637
	1637	1637	1637
	1634	1634	1634
	1634	1634	1634
	1634	1634	1634
	1633	1633	1633
	1632	1632	1632
	1632	1632	1632
	1632	1632	1632
	1631	1631	1631
	1631	1631	1631
	1631	1631	1631
	1629	1629	1629
	1629	1629	1629
	1627	1627	1627
	1625	1625	1625
	1623	1623	1623
	1623	1623	1623
	1622	1622	1622
	1622	1622	1622
	1621	1621	1621
	1620	1620	1620
	1620	1620	1620
	1619	1619	1619
	1619	1619	1619
		1617	1617
		1612	1612
		1611	1611
		1611	1611
		1610	1610
		1610	1610
		1610	1610
		1608	1608
		1607	1607
		1607	1607
		1607	1607
		1606	1606
		1606	1606
		1605	1605
		1604	1604
		1604	1604
		1604	1604
		1603	1603
		1603	1603
		1601	1601
		1601	1601
		1600	1600
		1599	1599
		1599	1599
		1599	1599
		1598	1598
		1597	1597
		1596	1596
		1596	1596
		1596	1596
		1595	1595
		1593	1593
		1593	1593
		1592	1592
		1588	1588
		1588	1588
		1588	1588
		1588	1588
		1584	1584
		1583	1583
		1583	1583
		1583	1583
		1582	1582
		1582	1582
		1580	1580
		1577	1577
		1576	1576
		1576	1576
		1575	1575
		1575	1575
		1575	1575
		1572	1572
		1571	1571
		1570	1570
		1570	1570
		1568	1568
		1567	1567
		1566	1566
		1566	1566
		1566	1566
		1566	1566
		1563	1563
		1563	1563
		1562	1562
		1562	1562
		1560	1560
		1560	1560
		1559	1559
		1559	1559
		1558	1558
		1557	1557
		1556	1556
		1556	1556
		1556	1556
		1555	1555
		1555	1555
		1555	1555
		1554	1554
		1554	1554
		1554	1554
		1552	1552
		1551	1551
		1551	1551
		1549	1549
		1549	1549
		1548	1548
		1548	1548
		1548	1548
		1547	1547
		1546	1546
		1545	1545
		1544	1544
		1544	1544
		1542	1542
		1541	1541
		1539	1539
		1536	1536
		1536	1536
		1535	1535
		1534	1534
		1533	1533
		1533	1533
		1532	1532
		1529	1529
		1529	1529
		1529	1529
		1528	1528
		1527	1527
		1526	1526
		1526	1526
		1526	1526
		1526	1526
		1523	1523
		1523	1523
		1523	1523
		1522	1522
		1521	1521
		1521	1521
		1521	1521
		1520	1520
		1519	1519
		1519	1519
		1519	1519
		1517	1517
		1516	1516
		1515	1515
		1515	1515
		1515	1515
		1514	1514
		1514	1514
		1514	1514
		1513	1513
		1513	1513
		1513	1513
		1512	1512
		1512	1512
		1511	1511
		1508	1508
		1507	1507
		1506	1506
		1505	1505
		1505	1505
		1505	1505
		1505	1505
		1502	1502
		1502	1502
		1500	1500
		1499	1499
		1499	1499
		1495	1495
		1493	1493
		1492	1492
		1490	1490
		1490	1490
		1488	1488
		1487	1487
		1487	1487
		1487	1487
		1487	1487
		1486	1486
		1485	1485
		1485	1485
		1484	1484
		1482	1482
		1482	1482
		1481	1481
		1480	1480
		1480	1480
		1480	1480
		1479	1479
		1479	1479
		1479	1479
		1476	1476
		1475	1475
		1475	1475
		1473	1473
		1471	1471
		1471	1471
		1470	1470
		1469	1469
		1467	1467
		1467	1467
		1467	1467
		1467	1467
		1466	1466
		1466	1466
		1465	1465
		1464	1464
		1464	1464
		1464	1464
		1462	1462
		1462	1462
		1462	1462
		1461	1461
		1460	1460
		1458	1458
		1458	1458
		1458	1458
		1455	1455
		1455	1455
		1454	1454
		1454	1454
		1454	1454
		1453	1453
		1453	1453
		1453	1453
		1451	1451
		1450	1450
		1448	1448
		1447	1447
		1447	1447
		1447	1447
		1446	1446
		1444	1444
		1443	1443
		1443	1443
		1440	1440
		1439	1439
		1439	1439
		1438	1438
		1438	1438
		1437	1437
		1436	1436
		1436	1436
		1435	1435
		1434	1434
		1434	1434
		1433	1433
		1432	1432
		1432	1432
		1431	1431
		1431	1431
		1431	1431
		1431	1431
		1431	1431
		1430	1430
		1430	1430
		1429	1429
		1428	1428
		1428	1428
		1427	1427
		1427	1427
		1427	1427
		1427	1427
		1425	1425
		1425	1425
		1425	1425
		1424	1424
		1423	1423
		1423	1423
		1421	1421
		1421	1421
		1421	1421
		1420	1420
		1420	1420
		1420	1420
		1420	1420
		1419	1419
		1419	1419
		1418	1418
		1417	1417
		1417	1417
		1417	1417
		1416	1416
		1416	1416
		1416	1416
		1415	1415
		1415	1415
		1414	1414
		1413	1413
		1411	1411
		1409	1409
		1408	1408
		1407	1407
		1407	1407
		1406	1406
		1404	1404
		1404	1404
		1403	1403
		1402	1402
		1401	1401
		1400	1400
		1399	1399
		1399	1399
		1397	1397
		1397	1397
		1396	1396
		1396	1396
		1393	1393
		1393	1393
		1391	1391
		1390	1390
		1389	1389
		1388	1388
		1388	1388
		1387	1387
		1384	1384
		1382	1382
		1382	1382
		1380	1380
		1380	1380
		1378	1378
		1377	1377
		1376	1376
		1375	1375
		1375	1375
		1373	1373
		1372	1372
		1371	1371
		1369	1369
		1369	1369
		1368	1368
		1365	1365
		1363	1363
		1363	1363
		1362	1362
		1361	1361
		1361	1361
		1361	1361
		1361	1361
		1359	1359
		1359	1359
		1358	1358
		1357	1357
		1357	1357
		1355	1355
		1355	1355
		1354	1354
		1352	1352
		1350	1350
		1349	1349
		1348	1348
		1348	1348
		1348	1348
		1347	1347
		1347	1347
		1346	1346
		1346	1346
		1346	1346
		1346	1346
		1344	1344
		1340	1340
		1338	1338
		1337	1337
		1337	1337
		1337	1337
		1337	1337
		1336	1336
		1336	1336
		1335	1335
		1335	1335
		1331	1331
		1331	1331
		1330	1330
		1329	1329
		1329	1329
		1329	1329
		1328	1328
		1327	1327
		1326	1326
		1325	1325
		1325	1325
		1324	1324
		1323	1323
		1322	1322
		1322	1322
		1321	1321
		1320	1320
		1320	1320
		1319	1319
		1319	1319
		1317	1317
		1316	1316
		1315	1315
		1315	1315
		1314	1314
		1314	1314
		1314	1314
		1313	1313
		1312	1312
		1309	1309
		1307	1307
		1306	1306
		1305	1305
		1305	1305
		1304	1304
		1303	1303
		1303	1303
		1302	1302
		1301	1301
		1301	1301
		1301	1301
		1301	1301
		1301	1301
		1300	1300
		1300	1300
		1298	1298
		1297	1297
		1297	1297
		1296	1296
		1296	1296
		1295	1295
		1294	1294
		1294	1294
		1294	1294
		1294	1294
		1293	1293
		1293	1293
		1292	1292
		1291	1291
		1291	1291
		1290	1290
		1289	1289
		1289	1289
		1288	1288
		1287	1287
		1286	1286
		1286	1286
		1285	1285
		1285	1285
		1284	1284
		1284	1284
		1283	1283
		1283	1283
		1283	1283
		1282	1282
		1281	1281
		1280	1280
		1280	1280
		1280	1280
		1279	1279
		1279	1279
		1279	1279
		1278	1278
		1278	1278
		1277	1277
		1276	1276
		1276	1276
		1276	1276
		1275	1275
		1275	1275
		1274	1274
		1274	1274
		1272	1272
		1272	1272
		1271	1271
		1270	1270
		1270	1270
		1270	1270
		1269	1269
		1268	1268
		1267	1267
		1267	1267
		1267	1267
		1267	1267
		1266	1266
		1266	1266
		1265	1265
		1265	1265
		1264	1264
		1264	1264
		1263	1263
		1263	1263
		1263	1263
		1262	1262
		1262	1262
		1260	1260
		1260	1260
		1259	1259
		1259	1259
		1258	1258
		1258	1258
		1256	1256
		1256	1256
		1256	1256
		1254	1254
		1253	1253
		1252	1252
		1252	1252
		1251	1251
		1250	1250
		1249	1249
		1249	1249
		1247	1247
		1246	1246
		1246	1246
		1244	1244
		1242	1242
		1242	1242
		1241	1241
		1241	1241
		1241	1241
		1241	1241
		1239	1239
		1239	1239
		1239	1239
		1239	1239
		1237	1237
		1237	1237
		1237	1237
		1236	1236
		1236	1236
		1236	1236
		1236	1236
		1236	1236
		1235	1235
		1235	1235
		1235	1235
		1235	1235
		1234	1234
		1233	1233
		1232	1232
		1231	1231
		1231	1231
		1230	1230
		1230	1230
		1230	1230
		1227	1227
		1227	1227
		1227	1227
		1226	1226
		1226	1226
		1226	1226
		1225	1225
		1225	1225
		1225	1225
		1224	1224
		1224	1224
		1223	1223
		1222	1222
		1221	1221
		1221	1221
		1221	1221
		1219	1219
		1218	1218
		1218	1218
		1218	1218
		1217	1217
		1217	1217
		1217	1217
		1216	1216
		1215	1215
		1215	1215
		1214	1214
		1213	1213
		1211	1211
		1211	1211
		1210	1210
		1210	1210
		1209	1209
		1209	1209
		1209	1209
		1206	1206
		1206	1206
		1205	1205
		1205	1205
		1204	1204
		1203	1203
		1203	1203
		1202	1202
		1202	1202
		1202	1202
		1200	1200
		1200	1200
		1198	1198
		1197	1197
		1197	1197
		1196	1196
		1196	1196
		1195	1195
		1195	1195
		1195	1195
		1192	1192
		1192	1192
		1192	1192
		1192	1192
		1191	1191
		1191	1191
		1190	1190
		1190	1190
		1189	1189
		1188	1188
		1188	1188
		1188	1188
		1188	1188
		1187	1187
		1186	1186
		1185	1185
		1185	1185
		1185	1185
		1182	1182
		1180	1180
		1179	1179
		1179	1179
		1178	1178
		1175	1175
		1174	1174
		1174	1174
		1172	1172
		1171	1171
		1170	1170
		1169	1169
		1169	1169
		1169	1169
		1168	1168
		1168	1168
		1166	1166
		1166	1166
		1165	1165
		1165	1165
		1165	1165
		1164	1164
		1164	1164
		1163	1163
		1162	1162
		1162	1162
		1162	1162
		1161	1161
		1160	1160
		1159	1159
		1159	1159
		1158	1158
		1158	1158
		1157	1157
		1155	1155
		1155	1155
		1154	1154
		1152	1152
		1152	1152
		1150	1150
		1150	1150
		1150	1150
		1147	1147
		1147	1147
		1147	1147
		1145	1145
		1145	1145
		1144	1144
		1143	1143
		1143	1143
		1142	1142
		1140	1140
		1140	1140
		1138	1138
		1138	1138
		1137	1137
		1137	1137
		1136	1136
		1135	1135
		1134	1134
		1134	1134
		1134	1134
		1133	1133
		1132	1132
		1132	1132
		1132	1132
		1132	1132
		1131	1131
		1131	1131
		1129	1129
		1129	1129
		1129	1129
		1129	1129
		1128	1128
		1128	1128
		1128	1128
		1127	1127
		1126	1126
		1125	1125
		1125	1125
		1125	1125
		1124	1124
		1124	1124
		1124	1124
		1124	1124
		1123	1123
		1123	1123
		1122	1122
		1122	1122
		1122	1122
		1121	1121
		1121	1121
		1120	1120
		1118	1118
		1118	1118
		1115	1115
		1115	1115
		1115	1115
		1114	1114
		1111	1111
		1110	1110
		1109	1109
		1109	1109
		1108	1108
		1107	1107
		1107	1107
		1106	1106
		1104	1104
		1104	1104
		1104	1104
		1104	1104
		1103	1103
		1103	1103
		1102	1102
		1102	1102
		1101	1101
		1101	1101
		1101	1101
		1101	1101
		1101	1101
		1100	1100
		1097	1097
		1096	1096
		1095	1095
		1095	1095
		1094	1094
		1093	1093
		1093	1093
		1093	1093
		1092	1092
		1091	1091
		1090	1090
		1090	1090
		1090	1090
		1089	1089
		1088	1088
		1088	1088
		1086	1086
		1085	1085
		1085	1085
		1085	1085
		1084	1084
		1084	1084
		1084	1084
		1084	1084
		1083	1083
		1080	1080
		1080	1080
		1079	1079
		1078	1078
		1076	1076
		1076	1076
		1075	1075
		1074	1074
		1073	1073
		1072	1072
		1072	1072
		1071	1071
		1069	1069
		1069	1069
		1068	1068
		1068	1068
		1067	1067
		1066	1066
		1066	1066
		1065	1065
		1064	1064
		1064	1064
		1064	1064
		1062	1062
		1062	1062
		1062	1062
		1062	1062
		1061	1061
		1061	1061
		1060	1060
		1057	1057
		1057	1057
		1057	1057
		1056	1056
		1056	1056
		1055	1055
		1055	1055
		1053	1053
		1051	1051
		1049	1049
		1049	1049
		1049	1049
		1048	1048
		1046	1046
		1045	1045
		1045	1045
		1044	1044
		1044	1044
		1042	1042
		1042	1042
		1042	1042
		1042	1042
		1041	1041
		1041	1041
		1041	1041
		1040	1040
		1040	1040
		1040	1040
		1040	1040
		1039	1039
		1039	1039
		1038	1038
		1036	1036
		1036	1036
		1035	1035
		1035	1035
		1034	1034
		1033	1033
		1033	1033
		1032	1032
		1031	1031
		1031	1031
		1030	1030
		1030	1030
		1029	1029
		1029	1029
		1028	1028
		1028	1028
		1028	1028
		1027	1027
		1026	1026
		1026	1026
		1023	1023
		1023	1023
		1022	1022
		1020	1020
		1020	1020
		1020	1020
		1019	1019
		1018	1018
		1017	1017
		1017	1017
		1016	1016
		1015	1015
		1015	1015
		1014	1014
		1014	1014
		1013	1013
		1012	1012
		1011	1011
		1009	1009
		1009	1009
		1007	1007
		1007	1007
		1007	1007
		1006	1006
		1004	1004
		1004	1004
		1002	1002
		1001	1001
		1001	1001
		1000	1000
		997	997
		995	995
		995	995
		995	995
		994	994
		994	994
		992	992
		992	992
		991	991
		991	991
		991	991
		990	990
		989	989
		989	989
		989	989
		988	988
		988	988
		986	986
		985	985
		985	985
		984	984
		983	983
		980	980
		979	979
		978	978
		978	978
		976	976
		976	976
		976	976
		975	975
		973	973
		973	973
		973	973
		973	973
		973	973
		972	972
		972	972
		971	971
		971	971
		971	971
		970	970
		969	969
		969	969
		968	968
		968	968
		968	968
		968	968
		968	968
		968	968
		967	967
		967	967
		966	966
		966	966
		966	966
		966	966
		964	964
		964	964
		964	964
		964	964
		963	963
		963	963
		962	962
		961	961
		961	961
		961	961
		960	960
		960	960
		959	959
		959	959
		959	959
		959	959
		958	958
		958	958
		958	958
		958	958
		956	956
		956	956
		956	956
		955	955
		954	954
		954	954
		954	954
		954	954
		954	954
		953	953
		953	953
		953	953
		953	953
		951	951
		951	951
		951	951
		951	951
		951	951
		950	950
		950	950
		950	950
		949	949
		948	948
		947	947
		947	947
		946	946
		945	945
		945	945
		945	945
		944	944
		944	944
		943	943
		942	942
		942	942
		941	941
		941	941
		941	941
		941	941
		941	941
		939	939
		938	938
		938	938
		937	937
		936	936
		936	936
		936	936
		936	936
		935	935
		934	934
		934	934
		934	934
		934	934
		934	934
		933	933
		933	933
		932	932
		931	931
		931	931
		931	931
		930	930
		930	930
		929	929
		929	929
		929	929
		926	926
		926	926
		926	926
		923	923
		923	923
		921	921
		921	921
		921	921
		920	920
		920	920
		919	919
		919	919
[truncated: 8,001 more rows]

## Sheet: Figure 2-figure supplement 1I
Data of genes	RiboD-PETRI of CC					Figure 2-figure supplement 1I
	Top 1000	Top 5000	Top 10000			The median of genes
	3344	3344	3344			Top 1000	Top 5000	Top 10000
	3002	3002	3002			1262	529	219
	2976	2976	2976
	2873	2873	2873
	2768	2768	2768
	2737	2737	2737
	2731	2731	2731
	2590	2590	2590
	2489	2489	2489
	2464	2464	2464
	2315	2315	2315
	2309	2309	2309
	2281	2281	2281
	2235	2235	2235
	2227	2227	2227
	2215	2215	2215
	2168	2168	2168
	2161	2161	2161
	2142	2142	2142
	2128	2128	2128
	2125	2125	2125
	2124	2124	2124
	2111	2111	2111
	2100	2100	2100
	2100	2100	2100
	2081	2081	2081
	2078	2078	2078
	2063	2063	2063
	2060	2060	2060
	2051	2051	2051
	2033	2033	2033
	2031	2031	2031
	2028	2028	2028
	2005	2005	2005
	1987	1987	1987
	1986	1986	1986
	1973	1973	1973
	1968	1968	1968
	1958	1958	1958
	1944	1944	1944
	1942	1942	1942
	1934	1934	1934
	1925	1925	1925
	1909	1909	1909
	1902	1902	1902
	1891	1891	1891
	1883	1883	1883
	1881	1881	1881
	1881	1881	1881
	1881	1881	1881
	1879	1879	1879
	1868	1868	1868
	1867	1867	1867
	1860	1860	1860
	1858	1858	1858
	1850	1850	1850
	1848	1848	1848
	1847	1847	1847
	1847	1847	1847
	1845	1845	1845
	1826	1826	1826
	1819	1819	1819
	1818	1818	1818
	1815	1815	1815
	1800	1800	1800
	1793	1793	1793
	1790	1790	1790
	1788	1788	1788
	1788	1788	1788
	1788	1788	1788
	1787	1787	1787
	1782	1782	1782
	1780	1780	1780
	1776	1776	1776
	1775	1775	1775
	1772	1772	1772
	1772	1772	1772
	1770	1770	1770
	1758	1758	1758
	1744	1744	1744
	1741	1741	1741
	1739	1739	1739
	1734	1734	1734
	1732	1732	1732
	1729	1729	1729
	1727	1727	1727
	1726	1726	1726
	1724	1724	1724
	1723	1723	1723
	1720	1720	1720
	1718	1718	1718
	1715	1715	1715
	1713	1713	1713
	1712	1712	1712
	1710	1710	1710
	1710	1710	1710
	1708	1708	1708
	1705	1705	1705
	1703	1703	1703
	1702	1702	1702
	1701	1701	1701
	1696	1696	1696
	1696	1696	1696
	1693	1693	1693
	1691	1691	1691
	1689	1689	1689
	1688	1688	1688
	1684	1684	1684
	1681	1681	1681
	1680	1680	1680
	1679	1679	1679
	1670	1670	1670
	1669	1669	1669
	1667	1667	1667
	1665	1665	1665
	1665	1665	1665
	1664	1664	1664
	1661	1661	1661
	1660	1660	1660
	1660	1660	1660
	1659	1659	1659
	1658	1658	1658
	1655	1655	1655
	1654	1654	1654
	1653	1653	1653
	1646	1646	1646
	1644	1644	1644
	1643	1643	1643
	1642	1642	1642
	1640	1640	1640
	1632	1632	1632
	1632	1632	1632
	1631	1631	1631
	1629	1629	1629
	1628	1628	1628
	1626	1626	1626
	1625	1625	1625
	1624	1624	1624
	1623	1623	1623
	1620	1620	1620
	1618	1618	1618
	1611	1611	1611
	1610	1610	1610
	1610	1610	1610
	1609	1609	1609
	1607	1607	1607
	1605	1605	1605
	1605	1605	1605
	1603	1603	1603
	1602	1602	1602
	1601	1601	1601
	1601	1601	1601
	1601	1601	1601
	1596	1596	1596
	1594	1594	1594
	1593	1593	1593
	1593	1593	1593
	1590	1590	1590
	1589	1589	1589
	1584	1584	1584
	1583	1583	1583
	1580	1580	1580
	1572	1572	1572
	1569	1569	1569
	1569	1569	1569
	1568	1568	1568
	1566	1566	1566
	1566	1566	1566
	1565	1565	1565
	1565	1565	1565
	1563	1563	1563
	1560	1560	1560
	1552	1552	1552
	1551	1551	1551
	1551	1551	1551
	1551	1551	1551
	1550	1550	1550
	1548	1548	1548
	1547	1547	1547
	1547	1547	1547
	1545	1545	1545
	1545	1545	1545
	1544	1544	1544
	1543	1543	1543
	1539	1539	1539
	1538	1538	1538
	1538	1538	1538
	1535	1535	1535
	1534	1534	1534
	1533	1533	1533
	1532	1532	1532
	1532	1532	1532
	1528	1528	1528
	1526	1526	1526
	1523	1523	1523
	1522	1522	1522
	1517	1517	1517
	1515	1515	1515
	1515	1515	1515
	1514	1514	1514
	1514	1514	1514
	1513	1513	1513
	1512	1512	1512
	1512	1512	1512
	1511	1511	1511
	1511	1511	1511
	1510	1510	1510
	1510	1510	1510
	1509	1509	1509
	1504	1504	1504
	1504	1504	1504
	1504	1504	1504
	1503	1503	1503
	1502	1502	1502
	1502	1502	1502
	1500	1500	1500
	1497	1497	1497
	1497	1497	1497
	1496	1496	1496
	1496	1496	1496
	1495	1495	1495
	1494	1494	1494
	1489	1489	1489
	1487	1487	1487
	1486	1486	1486
	1482	1482	1482
	1481	1481	1481
	1481	1481	1481
	1478	1478	1478
	1477	1477	1477
	1477	1477	1477
	1477	1477	1477
	1475	1475	1475
	1474	1474	1474
	1474	1474	1474
	1473	1473	1473
	1472	1472	1472
	1471	1471	1471
	1468	1468	1468
	1467	1467	1467
	1467	1467	1467
	1466	1466	1466
	1466	1466	1466
	1466	1466	1466
	1463	1463	1463
	1462	1462	1462
	1462	1462	1462
	1459	1459	1459
	1456	1456	1456
	1456	1456	1456
	1456	1456	1456
	1456	1456	1456
	1455	1455	1455
	1453	1453	1453
	1452	1452	1452
	1452	1452	1452
	1451	1451	1451
	1450	1450	1450
	1447	1447	1447
	1445	1445	1445
	1444	1444	1444
	1444	1444	1444
	1444	1444	1444
	1442	1442	1442
	1442	1442	1442
	1442	1442	1442
	1437	1437	1437
	1437	1437	1437
	1435	1435	1435
	1435	1435	1435
	1433	1433	1433
	1433	1433	1433
	1432	1432	1432
	1427	1427	1427
	1427	1427	1427
	1427	1427	1427
	1426	1426	1426
	1426	1426	1426
	1426	1426	1426
	1425	1425	1425
	1425	1425	1425
	1424	1424	1424
	1423	1423	1423
	1422	1422	1422
	1422	1422	1422
	1421	1421	1421
	1417	1417	1417
	1416	1416	1416
	1415	1415	1415
	1415	1415	1415
	1413	1413	1413
	1413	1413	1413
	1411	1411	1411
	1411	1411	1411
	1411	1411	1411
	1410	1410	1410
	1410	1410	1410
	1409	1409	1409
	1409	1409	1409
	1408	1408	1408
	1408	1408	1408
	1408	1408	1408
	1408	1408	1408
	1407	1407	1407
	1405	1405	1405
	1404	1404	1404
	1403	1403	1403
	1402	1402	1402
	1401	1401	1401
	1400	1400	1400
	1400	1400	1400
	1397	1397	1397
	1397	1397	1397
	1397	1397	1397
	1396	1396	1396
	1394	1394	1394
	1394	1394	1394
	1393	1393	1393
	1391	1391	1391
	1391	1391	1391
	1391	1391	1391
	1389	1389	1389
	1388	1388	1388
	1388	1388	1388
	1388	1388	1388
	1388	1388	1388
	1386	1386	1386
	1386	1386	1386
	1385	1385	1385
	1384	1384	1384
	1381	1381	1381
	1379	1379	1379
	1379	1379	1379
	1379	1379	1379
	1379	1379	1379
	1378	1378	1378
	1378	1378	1378
	1373	1373	1373
	1372	1372	1372
	1369	1369	1369
	1369	1369	1369
	1368	1368	1368
	1368	1368	1368
	1367	1367	1367
	1367	1367	1367
	1367	1367	1367
	1366	1366	1366
	1365	1365	1365
	1364	1364	1364
	1362	1362	1362
	1362	1362	1362
	1361	1361	1361
	1359	1359	1359
	1359	1359	1359
	1358	1358	1358
	1357	1357	1357
	1356	1356	1356
	1356	1356	1356
	1354	1354	1354
	1354	1354	1354
	1354	1354	1354
	1354	1354	1354
	1354	1354	1354
	1352	1352	1352
	1352	1352	1352
	1350	1350	1350
	1349	1349	1349
	1349	1349	1349
	1348	1348	1348
	1345	1345	1345
	1343	1343	1343
	1343	1343	1343
	1343	1343	1343
	1341	1341	1341
	1340	1340	1340
	1340	1340	1340
	1338	1338	1338
	1338	1338	1338
	1337	1337	1337
	1336	1336	1336
	1336	1336	1336
	1336	1336	1336
	1336	1336	1336
	1335	1335	1335
	1335	1335	1335
	1335	1335	1335
	1334	1334	1334
	1333	1333	1333
	1332	1332	1332
	1331	1331	1331
	1330	1330	1330
	1328	1328	1328
	1328	1328	1328
	1327	1327	1327
	1326	1326	1326
	1326	1326	1326
	1324	1324	1324
	1324	1324	1324
	1322	1322	1322
	1321	1321	1321
	1321	1321	1321
	1319	1319	1319
	1319	1319	1319
	1318	1318	1318
	1318	1318	1318
	1317	1317	1317
	1316	1316	1316
	1316	1316	1316
	1315	1315	1315
	1314	1314	1314
	1314	1314	1314
	1314	1314	1314
	1313	1313	1313
	1312	1312	1312
	1312	1312	1312
	1312	1312	1312
	1311	1311	1311
	1308	1308	1308
	1308	1308	1308
	1307	1307	1307
	1307	1307	1307
	1306	1306	1306
	1306	1306	1306
	1306	1306	1306
	1305	1305	1305
	1304	1304	1304
	1304	1304	1304
	1304	1304	1304
	1304	1304	1304
	1301	1301	1301
	1301	1301	1301
	1301	1301	1301
	1300	1300	1300
	1300	1300	1300
	1299	1299	1299
	1297	1297	1297
	1297	1297	1297
	1297	1297	1297
	1296	1296	1296
	1295	1295	1295
	1295	1295	1295
	1295	1295	1295
	1294	1294	1294
	1294	1294	1294
	1293	1293	1293
	1293	1293	1293
	1293	1293	1293
	1293	1293	1293
	1293	1293	1293
	1292	1292	1292
	1291	1291	1291
	1289	1289	1289
	1289	1289	1289
	1289	1289	1289
	1288	1288	1288
	1287	1287	1287
	1287	1287	1287
	1287	1287	1287
	1287	1287	1287
	1286	1286	1286
	1286	1286	1286
	1286	1286	1286
	1284	1284	1284
	1283	1283	1283
	1283	1283	1283
	1282	1282	1282
	1282	1282	1282
	1282	1282	1282
	1282	1282	1282
	1281	1281	1281
	1281	1281	1281
	1281	1281	1281
	1280	1280	1280
	1279	1279	1279
	1279	1279	1279
	1279	1279	1279
	1279	1279	1279
	1277	1277	1277
	1277	1277	1277
	1277	1277	1277
	1276	1276	1276
	1274	1274	1274
	1274	1274	1274
	1272	1272	1272
	1271	1271	1271
	1271	1271	1271
	1270	1270	1270
	1270	1270	1270
	1270	1270	1270
	1270	1270	1270
	1270	1270	1270
	1269	1269	1269
	1269	1269	1269
	1269	1269	1269
	1268	1268	1268
	1268	1268	1268
	1266	1266	1266
	1263	1263	1263
	1263	1263	1263
	1263	1263	1263
	1262	1262	1262
	1260	1260	1260
	1260	1260	1260
	1259	1259	1259
	1259	1259	1259
	1259	1259	1259
	1258	1258	1258
	1257	1257	1257
	1255	1255	1255
	1255	1255	1255
	1255	1255	1255
	1255	1255	1255
	1253	1253	1253
	1252	1252	1252
	1252	1252	1252
	1251	1251	1251
	1251	1251	1251
	1250	1250	1250
	1250	1250	1250
	1248	1248	1248
	1248	1248	1248
	1246	1246	1246
	1245	1245	1245
	1243	1243	1243
	1243	1243	1243
	1243	1243	1243
	1242	1242	1242
	1241	1241	1241
	1241	1241	1241
	1241	1241	1241
	1241	1241	1241
	1241	1241	1241
	1240	1240	1240
	1238	1238	1238
	1237	1237	1237
	1236	1236	1236
	1235	1235	1235
	1235	1235	1235
	1234	1234	1234
	1234	1234	1234
	1234	1234	1234
	1233	1233	1233
	1233	1233	1233
	1232	1232	1232
	1230	1230	1230
	1230	1230	1230
	1230	1230	1230
	1230	1230	1230
	1229	1229	1229
	1228	1228	1228
	1228	1228	1228
	1228	1228	1228
	1226	1226	1226
	1226	1226	1226
	1225	1225	1225
	1225	1225	1225
	1224	1224	1224
	1224	1224	1224
	1223	1223	1223
	1223	1223	1223
	1222	1222	1222
	1221	1221	1221
	1220	1220	1220
	1220	1220	1220
	1220	1220	1220
	1219	1219	1219
	1218	1218	1218
	1218	1218	1218
	1218	1218	1218
	1218	1218	1218
	1218	1218	1218
	1217	1217	1217
	1216	1216	1216
	1215	1215	1215
	1215	1215	1215
	1213	1213	1213
	1213	1213	1213
	1213	1213	1213
	1213	1213	1213
	1213	1213	1213
	1213	1213	1213
	1213	1213	1213
	1212	1212	1212
	1212	1212	1212
	1211	1211	1211
	1210	1210	1210
	1210	1210	1210
	1210	1210	1210
	1210	1210	1210
	1210	1210	1210
	1209	1209	1209
	1209	1209	1209
	1209	1209	1209
	1208	1208	1208
	1208	1208	1208
	1205	1205	1205
	1205	1205	1205
	1205	1205	1205
	1204	1204	1204
	1202	1202	1202
	1202	1202	1202
	1199	1199	1199
	1199	1199	1199
	1199	1199	1199
	1198	1198	1198
	1198	1198	1198
	1198	1198	1198
	1198	1198	1198
	1195	1195	1195
	1194	1194	1194
	1193	1193	1193
	1192	1192	1192
	1192	1192	1192
	1191	1191	1191
	1190	1190	1190
	1190	1190	1190
	1190	1190	1190
	1189	1189	1189
	1189	1189	1189
	1189	1189	1189
	1189	1189	1189
	1189	1189	1189
	1188	1188	1188
	1188	1188	1188
	1186	1186	1186
	1186	1186	1186
	1186	1186	1186
	1185	1185	1185
	1185	1185	1185
	1184	1184	1184
	1183	1183	1183
	1183	1183	1183
	1183	1183	1183
	1183	1183	1183
	1183	1183	1183
	1182	1182	1182
	1182	1182	1182
	1182	1182	1182
	1181	1181	1181
	1181	1181	1181
	1180	1180	1180
	1178	1178	1178
	1178	1178	1178
	1178	1178	1178
	1177	1177	1177
	1176	1176	1176
	1175	1175	1175
	1175	1175	1175
	1175	1175	1175
	1174	1174	1174
	1173	1173	1173
	1173	1173	1173
	1172	1172	1172
	1172	1172	1172
	1172	1172	1172
	1169	1169	1169
	1169	1169	1169
	1169	1169	1169
	1169	1169	1169
	1168	1168	1168
	1167	1167	1167
	1166	1166	1166
	1166	1166	1166
	1166	1166	1166
	1166	1166	1166
	1166	1166	1166
	1166	1166	1166
	1165	1165	1165
	1165	1165	1165
	1164	1164	1164
	1163	1163	1163
	1163	1163	1163
	1162	1162	1162
	1161	1161	1161
	1161	1161	1161
	1160	1160	1160
	1160	1160	1160
	1160	1160	1160
	1160	1160	1160
	1159	1159	1159
	1159	1159	1159
	1159	1159	1159
	1158	1158	1158
	1157	1157	1157
	1157	1157	1157
	1156	1156	1156
	1156	1156	1156
	1156	1156	1156
	1155	1155	1155
	1155	1155	1155
	1154	1154	1154
	1154	1154	1154
	1154	1154	1154
	1153	1153	1153
	1153	1153	1153
	1153	1153	1153
	1152	1152	1152
	1151	1151	1151
	1151	1151	1151
	1151	1151	1151
	1151	1151	1151
	1151	1151	1151
	1150	1150	1150
	1150	1150	1150
	1150	1150	1150
	1149	1149	1149
	1148	1148	1148
	1148	1148	1148
	1148	1148	1148
	1147	1147	1147
	1147	1147	1147
	1147	1147	1147
	1147	1147	1147
	1146	1146	1146
	1145	1145	1145
	1145	1145	1145
	1144	1144	1144
	1143	1143	1143
	1143	1143	1143
	1143	1143	1143
	1142	1142	1142
	1142	1142	1142
	1141	1141	1141
	1141	1141	1141
	1140	1140	1140
	1140	1140	1140
	1139	1139	1139
	1138	1138	1138
	1137	1137	1137
	1137	1137	1137
	1137	1137	1137
	1136	1136	1136
	1136	1136	1136
	1135	1135	1135
	1135	1135	1135
	1134	1134	1134
	1134	1134	1134
	1134	1134	1134
	1134	1134	1134
	1132	1132	1132
	1132	1132	1132
	1131	1131	1131
	1131	1131	1131
	1131	1131	1131
	1130	1130	1130
	1130	1130	1130
	1128	1128	1128
	1128	1128	1128
	1128	1128	1128
	1128	1128	1128
	1127	1127	1127
	1127	1127	1127
	1127	1127	1127
	1126	1126	1126
	1125	1125	1125
	1125	1125	1125
	1125	1125	1125
	1125	1125	1125
	1125	1125	1125
	1124	1124	1124
	1124	1124	1124
	1124	1124	1124
	1123	1123	1123
	1122	1122	1122
	1122	1122	1122
	1122	1122	1122
	1121	1121	1121
	1121	1121	1121
	1120	1120	1120
	1120	1120	1120
	1120	1120	1120
	1119	1119	1119
	1119	1119	1119
	1119	1119	1119
	1118	1118	1118
	1118	1118	1118
	1117	1117	1117
	1117	1117	1117
	1117	1117	1117
	1116	1116	1116
	1115	1115	1115
	1115	1115	1115
	1115	1115	1115
	1115	1115	1115
	1113	1113	1113
	1113	1113	1113
	1113	1113	1113
	1113	1113	1113
	1111	1111	1111
	1110	1110	1110
	1110	1110	1110
	1110	1110	1110
	1109	1109	1109
	1109	1109	1109
	1109	1109	1109
	1108	1108	1108
	1107	1107	1107
	1107	1107	1107
	1107	1107	1107
	1107	1107	1107
	1105	1105	1105
	1105	1105	1105
	1105	1105	1105
	1104	1104	1104
	1104	1104	1104
	1104	1104	1104
	1103	1103	1103
	1102	1102	1102
	1102	1102	1102
	1101	1101	1101
	1101	1101	1101
	1101	1101	1101
	1101	1101	1101
	1099	1099	1099
	1099	1099	1099
	1099	1099	1099
	1098	1098	1098
	1097	1097	1097
	1097	1097	1097
	1097	1097	1097
	1097	1097	1097
	1096	1096	1096
	1096	1096	1096
	1096	1096	1096
	1096	1096	1096
	1096	1096	1096
	1095	1095	1095
	1095	1095	1095
	1095	1095	1095
	1093	1093	1093
	1092	1092	1092
	1091	1091	1091
	1091	1091	1091
	1091	1091	1091
	1091	1091	1091
	1090	1090	1090
	1090	1090	1090
	1090	1090	1090
	1089	1089	1089
	1089	1089	1089
	1089	1089	1089
	1089	1089	1089
	1088	1088	1088
	1087	1087	1087
	1087	1087	1087
	1087	1087	1087
	1087	1087	1087
	1087	1087	1087
	1086	1086	1086
	1086	1086	1086
	1086	1086	1086
	1086	1086	1086
	1084	1084	1084
	1084	1084	1084
	1084	1084	1084
	1084	1084	1084
	1083	1083	1083
	1082	1082	1082
	1082	1082	1082
	1082	1082	1082
	1082	1082	1082
	1081	1081	1081
	1080	1080	1080
	1080	1080	1080
	1080	1080	1080
	1080	1080	1080
	1079	1079	1079
	1079	1079	1079
	1079	1079	1079
	1079	1079	1079
	1079	1079	1079
	1077	1077	1077
	1077	1077	1077
	1077	1077	1077
	1077	1077	1077
	1077	1077	1077
	1076	1076	1076
	1076	1076	1076
	1076	1076	1076
	1075	1075	1075
	1075	1075	1075
	1074	1074	1074
	1074	1074	1074
	1074	1074	1074
	1073	1073	1073
	1073	1073	1073
	1071	1071	1071
	1071	1071	1071
	1071	1071	1071
	1070	1070	1070
	1070	1070	1070
	1070	1070	1070
	1070	1070	1070
	1069	1069	1069
	1069	1069	1069
	1068	1068	1068
	1067	1067	1067
	1067	1067	1067
	1067	1067	1067
	1067	1067	1067
	1066	1066	1066
	1066	1066	1066
	1066	1066	1066
	1066	1066	1066
	1065	1065	1065
	1065	1065	1065
	1065	1065	1065
	1065	1065	1065
	1064	1064	1064
	1064	1064	1064
	1064	1064	1064
	1064	1064	1064
	1064	1064	1064
	1064	1064	1064
	1064	1064	1064
	1064	1064	1064
	1064	1064	1064
	1063	1063	1063
	1063	1063	1063
	1063	1063	1063
	1062	1062	1062
	1062	1062	1062
	1062	1062	1062
	1061	1061	1061
	1061	1061	1061
	1061	1061	1061
	1061	1061	1061
	1060	1060	1060
	1060	1060	1060
	1059	1059	1059
	1059	1059	1059
	1059	1059	1059
	1059	1059	1059
	1057	1057	1057
	1056	1056	1056
	1055	1055	1055
	1055	1055	1055
	1055	1055	1055
	1054	1054	1054
	1054	1054	1054
	1054	1054	1054
	1053	1053	1053
	1053	1053	1053
	1053	1053	1053
	1053	1053	1053
	1053	1053	1053
	1052	1052	1052
	1051	1051	1051
	1051	1051	1051
	1051	1051	1051
	1051	1051	1051
	1050	1050	1050
	1050	1050	1050
	1049	1049	1049
	1049	1049	1049
	1049	1049	1049
	1049	1049	1049
	1048	1048	1048
	1048	1048	1048
	1048	1048	1048
	1048	1048	1048
	1047	1047	1047
	1047	1047	1047
	1047	1047	1047
	1047	1047	1047
	1047	1047	1047
	1047	1047	1047
	1046	1046	1046
	1046	1046	1046
	1045	1045	1045
	1045	1045	1045
	1044	1044	1044
	1043	1043	1043
	1043	1043	1043
	1043	1043	1043
	1043	1043	1043
	1042	1042	1042
	1042	1042	1042
	1042	1042	1042
	1041	1041	1041
	1041	1041	1041
	1040	1040	1040
	1040	1040	1040
	1039	1039	1039
	1039	1039	1039
	1038	1038	1038
	1038	1038	1038
	1037	1037	1037
	1037	1037	1037
	1036	1036	1036
	1036	1036	1036
	1036	1036	1036
	1036	1036	1036
	1036	1036	1036
	1035	1035	1035
	1035	1035	1035
	1034	1034	1034
	1034	1034	1034
	1033	1033	1033
	1032	1032	1032
		1032	1032
		1032	1032
		1032	1032
		1031	1031
		1031	1031
		1031	1031
		1030	1030
		1030	1030
		1029	1029
		1029	1029
		1029	1029
		1029	1029
		1026	1026
		1026	1026
		1026	1026
		1026	1026
		1026	1026
		1026	1026
		1025	1025
		1025	1025
		1024	1024
		1024	1024
		1024	1024
		1023	1023
		1023	1023
		1023	1023
		1022	1022
		1021	1021
		1021	1021
		1020	1020
		1020	1020
		1019	1019
		1019	1019
		1019	1019
		1019	1019
		1019	1019
		1019	1019
		1018	1018
		1018	1018
		1018	1018
		1017	1017
		1017	1017
		1017	1017
		1017	1017
		1017	1017
		1016	1016
		1015	1015
		1014	1014
		1014	1014
		1013	1013
		1012	1012
		1011	1011
		1011	1011
		1011	1011
		1011	1011
		1011	1011
		1011	1011
		1010	1010
		1009	1009
		1008	1008
		1008	1008
		1008	1008
		1007	1007
		1007	1007
		1007	1007
		1007	1007
		1006	1006
		1006	1006
		1006	1006
		1005	1005
		1005	1005
		1004	1004
		1004	1004
		1004	1004
		1004	1004
		1003	1003
		1003	1003
		1002	1002
		1002	1002
		1002	1002
		1001	1001
		1000	1000
		999	999
		999	999
		999	999
		998	998
		998	998
		998	998
		998	998
		998	998
		998	998
		998	998
		997	997
		996	996
		995	995
		994	994
		994	994
		994	994
		994	994
		994	994
		993	993
		993	993
		993	993
		993	993
		993	993
		993	993
		992	992
		992	992
		991	991
		990	990
		990	990
		989	989
		989	989
		989	989
		988	988
		988	988
		988	988
		987	987
		987	987
		986	986
		986	986
		985	985
		985	985
		985	985
		985	985
		985	985
		985	985
		984	984
		984	984
		984	984
		983	983
		983	983
		982	982
		982	982
		981	981
		981	981
		981	981
		980	980
		980	980
		979	979
		979	979
		979	979
		979	979
		978	978
		978	978
		978	978
		978	978
		978	978
		978	978
		978	978
		977	977
		976	976
		976	976
		976	976
		975	975
		975	975
		975	975
		974	974
		974	974
		974	974
		974	974
		974	974
		973	973
		973	973
		972	972
		972	972
		972	972
		972	972
		972	972
		972	972
		972	972
		971	971
		971	971
		970	970
		970	970
		969	969
		969	969
		968	968
		968	968
		968	968
		968	968
		967	967
		967	967
		967	967
		966	966
		966	966
		966	966
		966	966
		966	966
		965	965
		965	965
		965	965
		964	964
		964	964
		963	963
		962	962
		962	962
		962	962
		962	962
		961	961
		961	961
		960	960
		960	960
		960	960
		960	960
		960	960
		959	959
		958	958
		958	958
		958	958
		957	957
		957	957
		957	957
		957	957
		957	957
		956	956
		956	956
		956	956
		956	956
		955	955
		955	955
		955	955
		954	954
		953	953
		953	953
		953	953
		953	953
		953	953
		952	952
		951	951
		951	951
		951	951
		950	950
		950	950
		950	950
		949	949
		949	949
		949	949
		949	949
		948	948
		948	948
		948	948
		948	948
		947	947
		946	946
		945	945
		945	945
		945	945
		944	944
		944	944
		944	944
		944	944
		943	943
		942	942
		942	942
		941	941
		941	941
		941	941
		941	941
		940	940
		939	939
		939	939
		938	938
		937	937
		937	937
		937	937
		937	937
		937	937
		937	937
		936	936
		936	936
		935	935
		934	934
		934	934
		934	934
		934	934
		933	933
		933	933
		933	933
		933	933
		932	932
		932	932
		932	932
		932	932
		931	931
		931	931
		931	931
		930	930
		929	929
		929	929
		929	929
		929	929
		928	928
		927	927
		927	927
		926	926
		926	926
		926	926
		925	925
		924	924
		924	924
		923	923
		923	923
		923	923
		923	923
		922	922
		922	922
		922	922
		922	922
		921	921
		921	921
		921	921
		921	921
		920	920
		920	920
		919	919
		919	919
		919	919
		919	919
		919	919
		918	918
		918	918
		918	918
		918	918
		917	917
		916	916
		916	916
		916	916
		915	915
		914	914
		913	913
		913	913
		912	912
		912	912
		912	912
		911	911
		911	911
		911	911
		910	910
		910	910
		910	910
		910	910
		910	910
		910	910
		909	909
		906	906
		906	906
		906	906
		904	904
		904	904
		903	903
		902	902
		902	902
		902	902
		901	901
		901	901
		901	901
		901	901
		900	900
		900	900
		900	900
		899	899
		898	898
		898	898
		898	898
		898	898
		897	897
		896	896
		896	896
		896	896
		896	896
		895	895
		895	895
		895	895
		894	894
		894	894
		894	894
		894	894
		893	893
		893	893
		893	893
		893	893
		893	893
		893	893
		893	893
		893	893
		892	892
		892	892
		891	891
		891	891
		890	890
		890	890
		890	890
		889	889
		889	889
		888	888
		887	887
		887	887
		887	887
		887	887
		887	887
		886	886
		886	886
		885	885
		885	885
		885	885
		884	884
		884	884
		884	884
		883	883
		882	882
		882	882
		882	882
		882	882
		882	882
		881	881
		881	881
		880	880
		880	880
		880	880
		879	879
		879	879
		879	879
		879	879
		878	878
		878	878
		878	878
		877	877
		877	877
		875	875
		875	875
		874	874
		874	874
		874	874
		874	874
		873	873
		873	873
		873	873
		873	873
		872	872
		872	872
		872	872
		872	872
		872	872
		871	871
		871	871
		871	871
		871	871
		871	871
		870	870
		870	870
		869	869
		868	868
		868	868
		868	868
		868	868
		868	868
		868	868
		868	868
		867	867
		866	866
		866	866
		866	866
		866	866
		866	866
		865	865
		865	865
		865	865
		865	865
		864	864
		864	864
		864	864
		864	864
		863	863
		863	863
		863	863
		862	862
		862	862
		862	862
		862	862
		862	862
		862	862
		862	862
		861	861
		860	860
		860	860
		860	860
		859	859
		859	859
		859	859
		858	858
		858	858
		858	858
		857	857
		857	857
		857	857
		856	856
		856	856
		856	856
		856	856
		856	856
		855	855
		855	855
		855	855
		853	853
		852	852
		852	852
		852	852
		851	851
		851	851
		851	851
		850	850
		850	850
		850	850
		849	849
		847	847
		846	846
		846	846
		845	845
		845	845
		844	844
		844	844
		844	844
		844	844
		844	844
		844	844
		844	844
		844	844
		844	844
		843	843
		843	843
		842	842
		842	842
		842	842
		842	842
		842	842
		841	841
		840	840
		840	840
		840	840
		839	839
		839	839
		838	838
		837	837
		837	837
		837	837
		837	837
		837	837
		837	837
		837	837
		837	837
		837	837
		836	836
		836	836
		835	835
		835	835
		835	835
		835	835
		834	834
		834	834
		833	833
		833	833
		831	831
		831	831
		831	831
		831	831
		831	831
		830	830
		830	830
		830	830
		830	830
		830	830
		829	829
		829	829
		828	828
		828	828
		828	828
		827	827
		827	827
		827	827
		826	826
		826	826
		826	826
		825	825
		825	825
		825	825
		825	825
		824	824
		824	824
		824	824
		824	824
		824	824
		823	823
		822	822
		822	822
		822	822
		822	822
		822	822
		822	822
		821	821
		821	821
		820	820
		820	820
		819	819
		818	818
		818	818
		817	817
		816	816
		816	816
		816	816
		816	816
		815	815
		815	815
		815	815
		815	815
		815	815
		814	814
		814	814
		813	813
		812	812
		812	812
		812	812
		812	812
		811	811
		811	811
		810	810
		810	810
		809	809
		809	809
		809	809
		809	809
		808	808
		808	808
		808	808
		808	808
		808	808
		807	807
		807	807
		806	806
		806	806
		806	806
		806	806
		805	805
		805	805
		805	805
		805	805
		804	804
		804	804
		804	804
		804	804
		803	803
		803	803
		803	803
		803	803
		802	802
		801	801
		801	801
		801	801
		800	800
		800	800
		800	800
		800	800
		800	800
		800	800
		799	799
		798	798
		798	798
		797	797
		797	797
		797	797
		796	796
		796	796
		795	795
		795	795
		795	795
		794	794
		794	794
		794	794
		794	794
		794	794
		793	793
		793	793
		793	793
		793	793
		793	793
		793	793
		793	793
		792	792
		791	791
		790	790
		790	790
		790	790
		789	789
		789	789
		788	788
		788	788
		788	788
		788	788
		788	788
		787	787
		787	787
		786	786
		786	786
		786	786
		785	785
		784	784
		784	784
		784	784
		783	783
		783	783
		783	783
		783	783
		782	782
		782	782
		781	781
		780	780
		780	780
		780	780
		779	779
		779	779
		779	779
		778	778
		778	778
		778	778
		778	778
		778	778
		778	778
		777	777
		777	777
		777	777
		777	777
		777	777
		777	777
		776	776
		776	776
		775	775
		775	775
		775	775
		775	775
		774	774
		773	773
		772	772
		772	772
		771	771
		771	771
		771	771
		769	769
		769	769
		769	769
		769	769
		769	769
		769	769
		768	768
		768	768
		768	768
		767	767
		766	766
		766	766
		765	765
		765	765
		765	765
		765	765
		764	764
		764	764
		764	764
		764	764
		763	763
		763	763
		763	763
		762	762
		762	762
		762	762
		761	761
		761	761
		759	759
		759	759
		759	759
		759	759
		759	759
		758	758
		758	758
		758	758
		757	757
		757	757
		757	757
		756	756
		756	756
		756	756
		755	755
		755	755
		755	755
		754	754
		754	754
		753	753
		753	753
		753	753
		752	752
		751	751
		751	751
		750	750
		750	750
		749	749
		749	749
		749	749
		748	748
		747	747
		747	747
		746	746
		746	746
		745	745
		745	745
		745	745
		744	744
		743	743
		743	743
		742	742
		742	742
		742	742
		742	742
		741	741
		740	740
		740	740
		740	740
		740	740
		740	740
		740	740
		739	739
		739	739
		738	738
		738	738
		738	738
		737	737
		737	737
		737	737
		737	737
		736	736
		736	736
		735	735
		735	735
		735	735
		735	735
		735	735
		735	735
		734	734
		734	734
		734	734
		733	733
		732	732
		732	732
		732	732
		731	731
		731	731
		731	731
		730	730
		730	730
		730	730
		730	730
		729	729
		729	729
		728	728
		728	728
		728	728
		727	727
		727	727
		726	726
		726	726
		725	725
		725	725
		724	724
		724	724
		724	724
		723	723
		723	723
		721	721
		721	721
		721	721
		721	721
		721	721
		720	720
		720	720
		720	720
		720	720
		719	719
		719	719
		718	718
		718	718
		717	717
		717	717
		716	716
		716	716
		716	716
		716	716
		716	716
		715	715
		715	715
		715	715
		715	715
		713	713
		713	713
		712	712
		712	712
		712	712
		712	712
		712	712
		711	711
		711	711
		711	711
		710	710
		709	709
		709	709
		709	709
		709	709
		709	709
		709	709
		708	708
		708	708
		707	707
		707	707
		707	707
		706	706
		706	706
		706	706
		706	706
		706	706
		705	705
		705	705
		705	705
		705	705
		705	705
		705	705
		705	705
		705	705
		704	704
		703	703
		703	703
		703	703
		703	703
		702	702
		702	702
		702	702
		702	702
		701	701
		701	701
		700	700
		700	700
		699	699
		699	699
		699	699
		699	699
		699	699
		699	699
		698	698
		698	698
		697	697
		697	697
		697	697
		697	697
		697	697
		696	696
		696	696
		696	696
		696	696
		695	695
		694	694
		694	694
		694	694
		694	694
		694	694
		694	694
		694	694
		693	693
		693	693
		693	693
		693	693
		692	692
		692	692
		692	692
		692	692
		691	691
		691	691
		691	691
		691	691
		690	690
		690	690
		689	689
		688	688
		688	688
		688	688
		688	688
		687	687
		687	687
		687	687
		687	687
		687	687
		686	686
		686	686
		686	686
		686	686
[truncated: 8,002 more rows]
