# Supplementary material for: An improved bacterial single-cell RNA-seq reveals biofilm heterogeneity
Source: eLife. 2024 Dec 17;13:RP97543. doi: 10.7554/eLife.97543 (PMC11651652; doi:10.7554/eLife.97543)
Supplement: Figure 2—source data 1. [file elife-97543-fig2-data1.xls]

## Sheet: Figure 2A
UMIs per cell of recovered cells			Figure 2A
RiboD-PETRI of exponential period E. coli			The median of UMIs
4244			RiboD-PETRI of exponential period E. coli
3649			102
2303
2219
1911
1905
1859
1838
1776
1700
1689
1607
1591
1510
1439
1362
1356
1331
1331
1287
1284
1267
1230
1189
1188
1172
1160
1149
1148
1147
1133
1129
1121
1114
1104
1103
1089
1086
1076
1071
1067
1027
1013
1004
1004
986
982
980
979
975
973
971
967
959
958
956
946
938
934
933
926
925
921
919
916
915
900
893
892
887
886
873
871
860
855
852
849
846
845
841
837
836
836
829
824
824
822
821
818
812
812
810
808
808
806
802
799
797
796
793
792
791
790
789
781
777
774
771
770
770
765
764
758
754
749
747
743
741
738
735
734
732
729
729
729
729
726
725
723
721
720
717
717
715
710
709
709
706
705
705
705
702
701
701
700
697
696
692
692
689
685
683
682
682
682
681
679
679
676
673
673
673
672
668
668
668
666
666
666
666
666
666
665
662
661
659
658
654
654
652
651
651
651
650
648
647
646
646
645
645
644
643
642
642
640
640
640
638
638
634
633
633
631
630
628
627
627
627
625
624
623
621
621
620
620
620
619
618
617
617
617
612
611
609
607
607
606
604
600
599
599
599
598
598
597
597
595
594
593
592
592
591
590
589
587
586
585
585
585
584
584
583
583
582
579
579
576
576
576
575
574
573
573
572
571
571
571
570
569
569
568
568
568
568
568
567
567
567
567
566
566
566
566
565
562
562
562
561
561
561
561
560
560
559
558
558
556
556
555
555
554
553
553
551
550
547
546
546
545
544
544
544
544
542
542
542
542
542
541
540
539
539
538
537
536
535
532
531
530
530
530
529
529
529
528
528
527
527
526
526
525
525
523
523
523
522
521
521
520
519
519
518
518
516
515
514
514
513
513
512
512
512
512
512
512
512
511
511
511
510
509
509
509
509
509
508
508
507
507
506
506
506
506
505
504
504
504
504
503
503
503
503
502
502
502
501
501
501
499
499
499
498
498
497
497
497
497
496
495
495
494
494
494
492
492
491
491
491
491
490
490
490
490
489
489
489
488
488
488
486
486
485
485
484
483
483
483
483
483
483
483
482
482
482
481
481
481
481
480
480
479
479
479
479
478
478
478
477
477
477
476
476
476
475
475
475
475
475
474
474
473
473
473
472
472
471
471
471
469
469
469
469
468
468
467
466
466
466
466
465
464
464
464
463
462
462
462
462
462
462
462
462
461
461
461
461
461
461
460
460
459
459
459
458
458
458
458
457
457
456
456
455
455
454
454
453
453
453
453
453
452
452
452
452
452
452
451
451
451
450
450
450
450
449
449
449
449
448
448
448
447
447
446
446
446
446
446
446
445
445
445
445
444
444
444
444
444
443
443
443
443
443
443
442
442
441
441
441
441
440
439
439
439
439
438
438
438
438
438
438
437
437
437
436
436
436
435
434
434
434
433
433
433
433
433
433
433
432
432
432
432
431
431
431
431
431
430
430
430
429
429
429
429
429
428
428
428
428
427
427
427
427
427
427
427
427
427
426
426
424
424
424
423
423
423
423
422
422
422
421
421
421
421
421
421
421
421
420
420
420
420
419
419
419
419
419
418
418
418
418
418
418
418
418
417
417
417
416
416
416
415
415
415
415
415
415
415
414
414
414
414
414
413
413
412
412
412
412
412
412
412
412
412
411
411
411
410
410
410
410
409
409
409
408
408
408
407
407
407
407
407
407
407
407
406
406
406
406
405
405
405
405
405
404
404
404
404
404
404
404
403
403
403
403
403
402
401
401
401
401
401
401
400
400
400
400
399
399
399
399
399
399
398
398
398
398
398
397
397
397
397
397
397
396
396
396
396
396
395
395
395
394
394
394
394
394
394
394
393
393
392
392
392
392
392
392
392
391
391
391
391
391
391
390
390
390
390
390
389
389
389
389
388
388
388
388
388
388
387
387
387
387
387
386
386
386
386
386
386
385
385
385
385
385
384
384
384
384
384
384
383
383
383
383
383
383
383
383
382
381
381
381
381
381
381
381
381
381
380
380
380
380
380
380
380
380
380
380
380
379
379
379
379
379
378
378
378
378
377
377
377
377
377
376
376
376
376
376
376
376
376
375
375
375
375
375
375
375
375
374
374
374
374
373
373
373
373
373
373
373
373
373
373
372
372
372
372
372
372
372
372
372
372
372
372
372
372
371
371
371
370
370
370
370
370
369
369
369
369
368
368
368
368
368
368
367
367
367
367
367
367
367
366
366
366
366
366
366
366
366
366
365
365
365
365
365
365
365
364
364
364
364
364
364
364
364
364
364
364
363
363
363
363
363
362
362
362
362
362
362
362
361
361
361
361
361
361
361
361
361
361
361
360
360
360
360
360
360
359
359
359
359
359
359
359
359
359
358
358
358
358
358
358
358
358
358
358
357
357
357
357
357
357
357
356
356
356
356
356
356
355
355
355
355
355
355
355
355
355
355
354
354
354
354
354
354
353
353
353
353
353
353
353
352
352
352
352
352
352
352
352
352
352
352
352
352
351
351
351
351
351
351
351
351
351
351
351
351
350
350
350
350
350
350
350
350
350
350
349
349
349
349
349
349
349
349
349
348
348
348
348
348
348
348
347
347
347
347
347
347
347
347
347
347
347
347
346
346
346
346
346
346
346
346
346
345
345
345
345
345
345
345
344
344
344
344
344
344
344
343
343
343
343
343
343
343
343
342
342
342
342
342
342
341
341
341
341
341
341
341
341
341
341
341
341
340
340
340
340
340
340
340
340
340
340
340
339
339
339
339
339
339
339
339
338
338
338
338
338
338
338
338
338
337
337
337
337
337
337
337
337
337
337
336
336
336
336
336
336
336
336
336
336
336
336
336
336
336
336
336
336
336
335
335
335
335
335
335
335
334
334
334
334
334
334
334
334
334
334
334
334
334
334
333
333
333
333
333
333
333
333
333
333
333
333
333
333
333
332
332
332
332
332
332
332
331
331
331
331
331
331
331
331
331
331
331
331
331
331
331
331
331
330
330
330
330
330
330
330
330
330
329
329
329
329
329
329
329
329
329
329
329
329
329
329
329
329
329
329
328
328
328
328
328
328
328
327
327
327
327
327
327
327
327
327
327
327
326
326
326
326
326
326
326
326
326
326
326
326
326
326
326
325
325
325
325
325
325
325
325
325
325
325
324
324
324
324
324
324
324
324
324
324
324
324
324
323
323
323
323
323
323
323
323
323
323
323
323
323
323
323
323
323
322
322
322
322
322
322
322
322
322
322
322
322
322
322
322
321
321
321
321
321
321
321
321
321
320
320
320
320
320
320
320
320
320
320
320
320
320
320
319
319
319
319
319
319
319
319
319
319
319
319
319
319
319
319
319
319
319
319
319
318
318
318
318
318
318
318
318
318
317
317
317
317
317
317
317
317
317
317
317
317
316
316
316
316
316
316
316
316
316
316
316
316
316
316
316
316
316
316
316
316
315
315
315
315
315
315
315
315
315
315
315
314
314
314
314
314
314
314
314
314
314
314
314
314
314
313
313
313
313
313
313
313
313
313
313
313
313
313
313
313
313
313
312
312
312
312
312
312
312
312
312
312
312
312
312
312
312
312
312
311
311
311
311
311
311
311
311
311
311
311
311
311
311
311
310
310
310
310
310
310
310
310
310
310
310
310
309
309
309
309
309
309
309
309
309
309
309
309
309
309
309
308
308
308
308
308
308
308
308
308
308
308
308
308
308
307
307
307
307
307
307
307
307
307
307
307
307
307
306
306
306
306
306
306
306
306
306
306
306
306
306
306
306
306
305
305
305
305
305
305
305
305
305
305
305
304
304
304
304
304
304
304
304
304
304
304
304
304
304
304
304
303
303
303
303
303
303
303
303
303
303
303
303
303
303
302
302
302
302
302
302
302
302
302
302
302
302
302
301
301
301
301
301
301
301
301
301
301
301
301
301
300
300
300
300
300
300
300
300
300
300
300
300
300
300
300
300
300
300
300
300
299
299
299
299
299
299
299
299
299
299
299
299
299
299
299
298
298
298
298
298
298
298
298
298
298
297
297
297
297
297
297
297
297
297
297
297
297
297
297
297
297
297
296
296
296
296
296
296
296
296
296
296
296
296
296
296
296
295
295
295
295
295
295
295
295
295
295
295
295
295
294
294
294
294
294
294
294
294
294
294
294
294
294
294
294
293
293
293
293
293
293
293
293
293
293
293
293
293
293
293
293
293
293
292
292
292
292
292
292
292
292
292
292
292
292
291
291
291
291
291
291
291
291
291
291
291
291
291
291
291
291
291
291
291
291
291
291
291
290
290
290
290
290
290
290
290
290
290
290
290
290
290
290
290
290
290
290
290
289
289
289
289
289
289
289
289
289
289
289
288
288
288
288
288
288
288
288
288
288
287
287
287
287
287
287
287
287
287
287
287
287
287
287
287
287
287
287
287
287
287
287
287
286
286
286
286
286
286
286
286
286
286
286
286
286
286
286
286
285
285
285
285
285
285
285
285
285
285
285
285
285
285
285
285
285
285
285
285
285
285
285
285
284
284
284
284
284
284
284
284
284
284
284
284
284
284
284
284
284
284
284
283
283
283
283
283
283
283
283
283
283
283
283
283
[truncated: 28,006 more rows]

## Sheet: Figure 2B
Data of UMIs	RiboD-PETRI of exponential period E. coli				Figure 2B
	Top 1000	Top 5000	Top 10000		The median of UMIs
	4244	4244	4244		Top 1000	Top 5000	Top 10000
	3649	3649	3649		462	259	193
	2303	2303	2303
	2219	2219	2219
	1911	1911	1911
	1905	1905	1905
	1859	1859	1859
	1838	1838	1838
	1776	1776	1776
	1700	1700	1700
	1689	1689	1689
	1607	1607	1607
	1591	1591	1591
	1510	1510	1510
	1439	1439	1439
	1362	1362	1362
	1356	1356	1356
	1331	1331	1331
	1331	1331	1331
	1287	1287	1287
	1284	1284	1284
	1267	1267	1267
	1230	1230	1230
	1189	1189	1189
	1188	1188	1188
	1172	1172	1172
	1160	1160	1160
	1149	1149	1149
	1148	1148	1148
	1147	1147	1147
	1133	1133	1133
	1129	1129	1129
	1121	1121	1121
	1114	1114	1114
	1104	1104	1104
	1103	1103	1103
	1089	1089	1089
	1086	1086	1086
	1076	1076	1076
	1071	1071	1071
	1067	1067	1067
	1027	1027	1027
	1013	1013	1013
	1004	1004	1004
	1004	1004	1004
	986	986	986
	982	982	982
	980	980	980
	979	979	979
	975	975	975
	973	973	973
	971	971	971
	967	967	967
	959	959	959
	958	958	958
	956	956	956
	946	946	946
	938	938	938
	934	934	934
	933	933	933
	926	926	926
	925	925	925
	921	921	921
	919	919	919
	916	916	916
	915	915	915
	900	900	900
	893	893	893
	892	892	892
	887	887	887
	886	886	886
	873	873	873
	871	871	871
	860	860	860
	855	855	855
	852	852	852
	849	849	849
	846	846	846
	845	845	845
	841	841	841
	837	837	837
	836	836	836
	836	836	836
	829	829	829
	824	824	824
	824	824	824
	822	822	822
	821	821	821
	818	818	818
	812	812	812
	812	812	812
	810	810	810
	808	808	808
	808	808	808
	806	806	806
	802	802	802
	799	799	799
	797	797	797
	796	796	796
	793	793	793
	792	792	792
	791	791	791
	790	790	790
	789	789	789
	781	781	781
	777	777	777
	774	774	774
	771	771	771
	770	770	770
	770	770	770
	765	765	765
	764	764	764
	758	758	758
	754	754	754
	749	749	749
	747	747	747
	743	743	743
	741	741	741
	738	738	738
	735	735	735
	734	734	734
	732	732	732
	729	729	729
	729	729	729
	729	729	729
	729	729	729
	726	726	726
	725	725	725
	723	723	723
	721	721	721
	720	720	720
	717	717	717
	717	717	717
	715	715	715
	710	710	710
	709	709	709
	709	709	709
	706	706	706
	705	705	705
	705	705	705
	705	705	705
	702	702	702
	701	701	701
	701	701	701
	700	700	700
	697	697	697
	696	696	696
	692	692	692
	692	692	692
	689	689	689
	685	685	685
	683	683	683
	682	682	682
	682	682	682
	682	682	682
	681	681	681
	679	679	679
	679	679	679
	676	676	676
	673	673	673
	673	673	673
	673	673	673
	672	672	672
	668	668	668
	668	668	668
	668	668	668
	666	666	666
	666	666	666
	666	666	666
	666	666	666
	666	666	666
	666	666	666
	665	665	665
	662	662	662
	661	661	661
	659	659	659
	658	658	658
	654	654	654
	654	654	654
	652	652	652
	651	651	651
	651	651	651
	651	651	651
	650	650	650
	648	648	648
	647	647	647
	646	646	646
	646	646	646
	645	645	645
	645	645	645
	644	644	644
	643	643	643
	642	642	642
	642	642	642
	640	640	640
	640	640	640
	640	640	640
	638	638	638
	638	638	638
	634	634	634
	633	633	633
	633	633	633
	631	631	631
	630	630	630
	628	628	628
	627	627	627
	627	627	627
	627	627	627
	625	625	625
	624	624	624
	623	623	623
	621	621	621
	621	621	621
	620	620	620
	620	620	620
	620	620	620
	619	619	619
	618	618	618
	617	617	617
	617	617	617
	617	617	617
	612	612	612
	611	611	611
	609	609	609
	607	607	607
	607	607	607
	606	606	606
	604	604	604
	600	600	600
	599	599	599
	599	599	599
	599	599	599
	598	598	598
	598	598	598
	597	597	597
	597	597	597
	595	595	595
	594	594	594
	593	593	593
	592	592	592
	592	592	592
	591	591	591
	590	590	590
	589	589	589
	587	587	587
	586	586	586
	585	585	585
	585	585	585
	585	585	585
	584	584	584
	584	584	584
	583	583	583
	583	583	583
	582	582	582
	579	579	579
	579	579	579
	576	576	576
	576	576	576
	576	576	576
	575	575	575
	574	574	574
	573	573	573
	573	573	573
	572	572	572
	571	571	571
	571	571	571
	571	571	571
	570	570	570
	569	569	569
	569	569	569
	568	568	568
	568	568	568
	568	568	568
	568	568	568
	568	568	568
	567	567	567
	567	567	567
	567	567	567
	567	567	567
	566	566	566
	566	566	566
	566	566	566
	566	566	566
	565	565	565
	562	562	562
	562	562	562
	562	562	562
	561	561	561
	561	561	561
	561	561	561
	561	561	561
	560	560	560
	560	560	560
	559	559	559
	558	558	558
	558	558	558
	556	556	556
	556	556	556
	555	555	555
	555	555	555
	554	554	554
	553	553	553
	553	553	553
	551	551	551
	550	550	550
	547	547	547
	546	546	546
	546	546	546
	545	545	545
	544	544	544
	544	544	544
	544	544	544
	544	544	544
	542	542	542
	542	542	542
	542	542	542
	542	542	542
	542	542	542
	541	541	541
	540	540	540
	539	539	539
	539	539	539
	538	538	538
	537	537	537
	536	536	536
	535	535	535
	532	532	532
	531	531	531
	530	530	530
	530	530	530
	530	530	530
	529	529	529
	529	529	529
	529	529	529
	528	528	528
	528	528	528
	527	527	527
	527	527	527
	526	526	526
	526	526	526
	525	525	525
	525	525	525
	523	523	523
	523	523	523
	523	523	523
	522	522	522
	521	521	521
	521	521	521
	520	520	520
	519	519	519
	519	519	519
	518	518	518
	518	518	518
	516	516	516
	515	515	515
	514	514	514
	514	514	514
	513	513	513
	513	513	513
	512	512	512
	512	512	512
	512	512	512
	512	512	512
	512	512	512
	512	512	512
	512	512	512
	511	511	511
	511	511	511
	511	511	511
	510	510	510
	509	509	509
	509	509	509
	509	509	509
	509	509	509
	509	509	509
	508	508	508
	508	508	508
	507	507	507
	507	507	507
	506	506	506
	506	506	506
	506	506	506
	506	506	506
	505	505	505
	504	504	504
	504	504	504
	504	504	504
	504	504	504
	503	503	503
	503	503	503
	503	503	503
	503	503	503
	502	502	502
	502	502	502
	502	502	502
	501	501	501
	501	501	501
	501	501	501
	499	499	499
	499	499	499
	499	499	499
	498	498	498
	498	498	498
	497	497	497
	497	497	497
	497	497	497
	497	497	497
	496	496	496
	495	495	495
	495	495	495
	494	494	494
	494	494	494
	494	494	494
	492	492	492
	492	492	492
	491	491	491
	491	491	491
	491	491	491
	491	491	491
	490	490	490
	490	490	490
	490	490	490
	490	490	490
	489	489	489
	489	489	489
	489	489	489
	488	488	488
	488	488	488
	488	488	488
	486	486	486
	486	486	486
	485	485	485
	485	485	485
	484	484	484
	483	483	483
	483	483	483
	483	483	483
	483	483	483
	483	483	483
	483	483	483
	483	483	483
	482	482	482
	482	482	482
	482	482	482
	481	481	481
	481	481	481
	481	481	481
	481	481	481
	480	480	480
	480	480	480
	479	479	479
	479	479	479
	479	479	479
	479	479	479
	478	478	478
	478	478	478
	478	478	478
	477	477	477
	477	477	477
	477	477	477
	476	476	476
	476	476	476
	476	476	476
	475	475	475
	475	475	475
	475	475	475
	475	475	475
	475	475	475
	474	474	474
	474	474	474
	473	473	473
	473	473	473
	473	473	473
	472	472	472
	472	472	472
	471	471	471
	471	471	471
	471	471	471
	469	469	469
	469	469	469
	469	469	469
	469	469	469
	468	468	468
	468	468	468
	467	467	467
	466	466	466
	466	466	466
	466	466	466
	466	466	466
	465	465	465
	464	464	464
	464	464	464
	464	464	464
	463	463	463
	462	462	462
	462	462	462
	462	462	462
	462	462	462
	462	462	462
	462	462	462
	462	462	462
	462	462	462
	461	461	461
	461	461	461
	461	461	461
	461	461	461
	461	461	461
	461	461	461
	460	460	460
	460	460	460
	459	459	459
	459	459	459
	459	459	459
	458	458	458
	458	458	458
	458	458	458
	458	458	458
	457	457	457
	457	457	457
	456	456	456
	456	456	456
	455	455	455
	455	455	455
	454	454	454
	454	454	454
	453	453	453
	453	453	453
	453	453	453
	453	453	453
	453	453	453
	452	452	452
	452	452	452
	452	452	452
	452	452	452
	452	452	452
	452	452	452
	451	451	451
	451	451	451
	451	451	451
	450	450	450
	450	450	450
	450	450	450
	450	450	450
	449	449	449
	449	449	449
	449	449	449
	449	449	449
	448	448	448
	448	448	448
	448	448	448
	447	447	447
	447	447	447
	446	446	446
	446	446	446
	446	446	446
	446	446	446
	446	446	446
	446	446	446
	445	445	445
	445	445	445
	445	445	445
	445	445	445
	444	444	444
	444	444	444
	444	444	444
	444	444	444
	444	444	444
	443	443	443
	443	443	443
	443	443	443
	443	443	443
	443	443	443
	443	443	443
	442	442	442
	442	442	442
	441	441	441
	441	441	441
	441	441	441
	441	441	441
	440	440	440
	439	439	439
	439	439	439
	439	439	439
	439	439	439
	438	438	438
	438	438	438
	438	438	438
	438	438	438
	438	438	438
	438	438	438
	437	437	437
	437	437	437
	437	437	437
	436	436	436
	436	436	436
	436	436	436
	435	435	435
	434	434	434
	434	434	434
	434	434	434
	433	433	433
	433	433	433
	433	433	433
	433	433	433
	433	433	433
	433	433	433
	433	433	433
	432	432	432
	432	432	432
	432	432	432
	432	432	432
	431	431	431
	431	431	431
	431	431	431
	431	431	431
	431	431	431
	430	430	430
	430	430	430
	430	430	430
	429	429	429
	429	429	429
	429	429	429
	429	429	429
	429	429	429
	428	428	428
	428	428	428
	428	428	428
	428	428	428
	427	427	427
	427	427	427
	427	427	427
	427	427	427
	427	427	427
	427	427	427
	427	427	427
	427	427	427
	427	427	427
	426	426	426
	426	426	426
	424	424	424
	424	424	424
	424	424	424
	423	423	423
	423	423	423
	423	423	423
	423	423	423
	422	422	422
	422	422	422
	422	422	422
	421	421	421
	421	421	421
	421	421	421
	421	421	421
	421	421	421
	421	421	421
	421	421	421
	421	421	421
	420	420	420
	420	420	420
	420	420	420
	420	420	420
	419	419	419
	419	419	419
	419	419	419
	419	419	419
	419	419	419
	418	418	418
	418	418	418
	418	418	418
	418	418	418
	418	418	418
	418	418	418
	418	418	418
	418	418	418
	417	417	417
	417	417	417
	417	417	417
	416	416	416
	416	416	416
	416	416	416
	415	415	415
	415	415	415
	415	415	415
	415	415	415
	415	415	415
	415	415	415
	415	415	415
	414	414	414
	414	414	414
	414	414	414
	414	414	414
	414	414	414
	413	413	413
	413	413	413
	412	412	412
	412	412	412
	412	412	412
	412	412	412
	412	412	412
	412	412	412
	412	412	412
	412	412	412
	412	412	412
	411	411	411
	411	411	411
	411	411	411
	410	410	410
	410	410	410
	410	410	410
	410	410	410
	409	409	409
	409	409	409
	409	409	409
	408	408	408
	408	408	408
	408	408	408
	407	407	407
	407	407	407
	407	407	407
	407	407	407
	407	407	407
	407	407	407
	407	407	407
	407	407	407
	406	406	406
	406	406	406
	406	406	406
	406	406	406
	405	405	405
	405	405	405
	405	405	405
	405	405	405
	405	405	405
	404	404	404
	404	404	404
	404	404	404
	404	404	404
	404	404	404
	404	404	404
	404	404	404
	403	403	403
	403	403	403
	403	403	403
	403	403	403
	403	403	403
	402	402	402
	401	401	401
	401	401	401
	401	401	401
	401	401	401
	401	401	401
	401	401	401
	400	400	400
	400	400	400
	400	400	400
	400	400	400
	399	399	399
	399	399	399
	399	399	399
	399	399	399
	399	399	399
	399	399	399
	398	398	398
	398	398	398
	398	398	398
	398	398	398
	398	398	398
	397	397	397
	397	397	397
	397	397	397
	397	397	397
	397	397	397
	397	397	397
	396	396	396
	396	396	396
	396	396	396
	396	396	396
	396	396	396
	395	395	395
	395	395	395
	395	395	395
	394	394	394
	394	394	394
	394	394	394
	394	394	394
	394	394	394
	394	394	394
	394	394	394
	393	393	393
	393	393	393
	392	392	392
	392	392	392
	392	392	392
	392	392	392
	392	392	392
	392	392	392
	392	392	392
	391	391	391
	391	391	391
	391	391	391
	391	391	391
	391	391	391
	391	391	391
	390	390	390
	390	390	390
	390	390	390
	390	390	390
	390	390	390
	389	389	389
	389	389	389
	389	389	389
	389	389	389
	388	388	388
	388	388	388
	388	388	388
	388	388	388
	388	388	388
	388	388	388
	387	387	387
	387	387	387
	387	387	387
	387	387	387
	387	387	387
	386	386	386
	386	386	386
	386	386	386
	386	386	386
	386	386	386
	386	386	386
	385	385	385
	385	385	385
	385	385	385
	385	385	385
	385	385	385
	384	384	384
	384	384	384
	384	384	384
	384	384	384
	384	384	384
	384	384	384
	383	383	383
	383	383	383
	383	383	383
	383	383	383
	383	383	383
	383	383	383
	383	383	383
	383	383	383
	382	382	382
	381	381	381
	381	381	381
	381	381	381
	381	381	381
	381	381	381
	381	381	381
	381	381	381
	381	381	381
	381	381	381
	380	380	380
	380	380	380
	380	380	380
	380	380	380
	380	380	380
	380	380	380
	380	380	380
	380	380	380
	380	380	380
	380	380	380
	380	380	380
	379	379	379
	379	379	379
	379	379	379
	379	379	379
	379	379	379
	378	378	378
	378	378	378
	378	378	378
	378	378	378
	377	377	377
	377	377	377
	377	377	377
	377	377	377
	377	377	377
	376	376	376
	376	376	376
	376	376	376
	376	376	376
	376	376	376
	376	376	376
	376	376	376
	376	376	376
	375	375	375
	375	375	375
	375	375	375
	375	375	375
	375	375	375
	375	375	375
	375	375	375
	375	375	375
	374	374	374
	374	374	374
	374	374	374
	374	374	374
	373	373	373
	373	373	373
	373	373	373
	373	373	373
	373	373	373
	373	373	373
	373	373	373
	373	373	373
	373	373	373
	373	373	373
	372	372	372
	372	372	372
	372	372	372
	372	372	372
	372	372	372
	372	372	372
	372	372	372
	372	372	372
	372	372	372
	372	372	372
	372	372	372
	372	372	372
	372	372	372
	372	372	372
	371	371	371
	371	371	371
	371	371	371
	370	370	370
	370	370	370
	370	370	370
	370	370	370
	370	370	370
	369	369	369
	369	369	369
	369	369	369
	369	369	369
	368	368	368
	368	368	368
	368	368	368
	368	368	368
	368	368	368
	368	368	368
	367	367	367
	367	367	367
	367	367	367
	367	367	367
	367	367	367
	367	367	367
	367	367	367
	366	366	366
	366	366	366
	366	366	366
	366	366	366
	366	366	366
	366	366	366
	366	366	366
	366	366	366
	366	366	366
	365	365	365
	365	365	365
	365	365	365
	365	365	365
	365	365	365
	365	365	365
	365	365	365
	364	364	364
	364	364	364
	364	364	364
	364	364	364
	364	364	364
	364	364	364
	364	364	364
	364	364	364
	364	364	364
	364	364	364
	364	364	364
	363	363	363
	363	363	363
	363	363	363
	363	363	363
	363	363	363
	362	362	362
	362	362	362
	362	362	362
	362	362	362
	362	362	362
	362	362	362
	362	362	362
	361	361	361
	361	361	361
	361	361	361
	361	361	361
	361	361	361
	361	361	361
	361	361	361
	361	361	361
	361	361	361
		361	361
		361	361
		360	360
		360	360
		360	360
		360	360
		360	360
		360	360
		359	359
		359	359
		359	359
		359	359
		359	359
		359	359
		359	359
		359	359
		359	359
		358	358
		358	358
		358	358
		358	358
		358	358
		358	358
		358	358
		358	358
		358	358
		358	358
		357	357
		357	357
		357	357
		357	357
		357	357
		357	357
		357	357
		356	356
		356	356
		356	356
		356	356
		356	356
		356	356
		355	355
		355	355
		355	355
		355	355
		355	355
		355	355
		355	355
		355	355
		355	355
		355	355
		354	354
		354	354
		354	354
		354	354
		354	354
		354	354
		353	353
		353	353
		353	353
		353	353
		353	353
		353	353
		353	353
		352	352
		352	352
		352	352
		352	352
		352	352
		352	352
		352	352
		352	352
		352	352
		352	352
		352	352
		352	352
		352	352
		351	351
		351	351
		351	351
		351	351
		351	351
		351	351
		351	351
		351	351
		351	351
		351	351
		351	351
		351	351
		350	350
		350	350
		350	350
		350	350
		350	350
		350	350
		350	350
		350	350
		350	350
		350	350
		349	349
		349	349
		349	349
		349	349
		349	349
		349	349
		349	349
		349	349
		349	349
		348	348
		348	348
		348	348
		348	348
		348	348
		348	348
		348	348
		347	347
		347	347
		347	347
		347	347
		347	347
		347	347
		347	347
		347	347
		347	347
		347	347
		347	347
		347	347
		346	346
		346	346
		346	346
		346	346
		346	346
		346	346
		346	346
		346	346
		346	346
		345	345
		345	345
		345	345
		345	345
		345	345
		345	345
		345	345
		344	344
		344	344
		344	344
		344	344
		344	344
		344	344
		344	344
		343	343
		343	343
		343	343
		343	343
		343	343
		343	343
		343	343
		343	343
		342	342
		342	342
		342	342
		342	342
		342	342
		342	342
		341	341
		341	341
		341	341
		341	341
		341	341
		341	341
		341	341
		341	341
		341	341
		341	341
		341	341
		341	341
		340	340
		340	340
		340	340
		340	340
		340	340
		340	340
		340	340
		340	340
		340	340
		340	340
		340	340
		339	339
		339	339
		339	339
		339	339
		339	339
		339	339
		339	339
		339	339
		338	338
		338	338
		338	338
		338	338
		338	338
		338	338
		338	338
		338	338
		338	338
		337	337
		337	337
		337	337
		337	337
		337	337
		337	337
		337	337
		337	337
		337	337
		337	337
		336	336
		336	336
		336	336
		336	336
		336	336
		336	336
		336	336
		336	336
		336	336
		336	336
		336	336
		336	336
		336	336
		336	336
		336	336
		336	336
		336	336
		336	336
		336	336
		335	335
		335	335
		335	335
		335	335
		335	335
		335	335
		335	335
		334	334
		334	334
		334	334
		334	334
		334	334
		334	334
		334	334
		334	334
		334	334
		334	334
		334	334
		334	334
		334	334
		334	334
		333	333
		333	333
		333	333
		333	333
		333	333
		333	333
		333	333
		333	333
		333	333
		333	333
		333	333
		333	333
		333	333
		333	333
		333	333
		332	332
		332	332
		332	332
		332	332
		332	332
		332	332
		332	332
		331	331
		331	331
		331	331
		331	331
		331	331
		331	331
		331	331
		331	331
		331	331
		331	331
		331	331
		331	331
		331	331
		331	331
		331	331
		331	331
		331	331
		330	330
		330	330
		330	330
		330	330
		330	330
		330	330
		330	330
		330	330
		330	330
		329	329
		329	329
		329	329
		329	329
		329	329
		329	329
		329	329
		329	329
		329	329
		329	329
		329	329
		329	329
		329	329
		329	329
		329	329
		329	329
		329	329
		329	329
		328	328
		328	328
		328	328
		328	328
		328	328
		328	328
		328	328
		327	327
		327	327
		327	327
		327	327
		327	327
		327	327
		327	327
		327	327
		327	327
		327	327
		327	327
		326	326
		326	326
		326	326
		326	326
		326	326
		326	326
		326	326
		326	326
		326	326
		326	326
		326	326
		326	326
		326	326
		326	326
		326	326
		325	325
		325	325
		325	325
		325	325
		325	325
		325	325
		325	325
		325	325
		325	325
		325	325
		325	325
		324	324
		324	324
		324	324
		324	324
		324	324
		324	324
		324	324
		324	324
		324	324
		324	324
		324	324
		324	324
		324	324
		323	323
		323	323
		323	323
		323	323
		323	323
		323	323
		323	323
		323	323
		323	323
		323	323
		323	323
		323	323
		323	323
		323	323
		323	323
		323	323
		323	323
		322	322
		322	322
		322	322
		322	322
		322	322
		322	322
		322	322
		322	322
		322	322
		322	322
		322	322
		322	322
		322	322
		322	322
		322	322
		321	321
		321	321
		321	321
		321	321
		321	321
		321	321
		321	321
		321	321
		321	321
		320	320
		320	320
		320	320
		320	320
		320	320
		320	320
		320	320
		320	320
		320	320
		320	320
		320	320
		320	320
		320	320
		320	320
		319	319
		319	319
		319	319
		319	319
		319	319
		319	319
		319	319
		319	319
		319	319
		319	319
		319	319
		319	319
		319	319
		319	319
		319	319
		319	319
		319	319
		319	319
		319	319
		319	319
		319	319
		318	318
		318	318
		318	318
		318	318
		318	318
		318	318
		318	318
		318	318
		318	318
		317	317
		317	317
		317	317
		317	317
		317	317
		317	317
		317	317
		317	317
		317	317
		317	317
		317	317
		317	317
		316	316
		316	316
		316	316
		316	316
		316	316
		316	316
		316	316
		316	316
		316	316
		316	316
		316	316
		316	316
		316	316
		316	316
		316	316
		316	316
		316	316
		316	316
		316	316
		316	316
		315	315
		315	315
		315	315
		315	315
		315	315
		315	315
		315	315
		315	315
		315	315
		315	315
		315	315
		314	314
		314	314
		314	314
		314	314
		314	314
		314	314
		314	314
		314	314
		314	314
		314	314
		314	314
		314	314
		314	314
		314	314
		313	313
		313	313
		313	313
		313	313
		313	313
		313	313
		313	313
		313	313
		313	313
		313	313
		313	313
		313	313
		313	313
		313	313
		313	313
		313	313
		313	313
		312	312
		312	312
		312	312
		312	312
		312	312
		312	312
		312	312
		312	312
		312	312
		312	312
		312	312
		312	312
		312	312
		312	312
		312	312
		312	312
		312	312
		311	311
		311	311
		311	311
		311	311
		311	311
		311	311
		311	311
		311	311
		311	311
		311	311
		311	311
		311	311
		311	311
		311	311
		311	311
		310	310
		310	310
		310	310
		310	310
		310	310
		310	310
		310	310
		310	310
		310	310
		310	310
		310	310
		310	310
		309	309
		309	309
		309	309
		309	309
		309	309
		309	309
		309	309
		309	309
		309	309
		309	309
		309	309
		309	309
		309	309
		309	309
		309	309
		308	308
		308	308
		308	308
		308	308
		308	308
		308	308
		308	308
		308	308
		308	308
		308	308
		308	308
		308	308
		308	308
		308	308
		307	307
		307	307
		307	307
		307	307
		307	307
		307	307
		307	307
		307	307
		307	307
		307	307
		307	307
		307	307
		307	307
		306	306
		306	306
		306	306
		306	306
		306	306
		306	306
		306	306
		306	306
		306	306
		306	306
		306	306
		306	306
		306	306
		306	306
		306	306
		306	306
		305	305
		305	305
		305	305
		305	305
		305	305
		305	305
		305	305
		305	305
		305	305
		305	305
		305	305
		304	304
		304	304
		304	304
		304	304
		304	304
		304	304
		304	304
		304	304
		304	304
		304	304
		304	304
		304	304
		304	304
		304	304
		304	304
		304	304
		303	303
		303	303
		303	303
		303	303
		303	303
		303	303
		303	303
		303	303
		303	303
		303	303
		303	303
		303	303
		303	303
		303	303
		302	302
		302	302
		302	302
		302	302
		302	302
		302	302
		302	302
		302	302
		302	302
		302	302
		302	302
		302	302
		302	302
		301	301
		301	301
		301	301
		301	301
		301	301
		301	301
		301	301
		301	301
		301	301
		301	301
		301	301
		301	301
		301	301
		300	300
		300	300
		300	300
		300	300
		300	300
		300	300
		300	300
		300	300
		300	300
		300	300
		300	300
		300	300
		300	300
		300	300
		300	300
		300	300
		300	300
		300	300
		300	300
		300	300
		299	299
		299	299
		299	299
		299	299
		299	299
		299	299
		299	299
		299	299
		299	299
		299	299
		299	299
		299	299
		299	299
		299	299
		299	299
		298	298
		298	298
		298	298
		298	298
		298	298
		298	298
		298	298
		298	298
		298	298
		298	298
		297	297
		297	297
		297	297
		297	297
		297	297
		297	297
		297	297
		297	297
		297	297
		297	297
		297	297
		297	297
		297	297
		297	297
		297	297
		297	297
		297	297
		296	296
		296	296
		296	296
		296	296
		296	296
		296	296
		296	296
		296	296
		296	296
		296	296
		296	296
		296	296
		296	296
		296	296
		296	296
		295	295
		295	295
		295	295
		295	295
		295	295
		295	295
		295	295
		295	295
		295	295
		295	295
		295	295
		295	295
		295	295
		294	294
		294	294
		294	294
		294	294
		294	294
		294	294
		294	294
		294	294
		294	294
		294	294
		294	294
		294	294
		294	294
		294	294
		294	294
		293	293
		293	293
		293	293
		293	293
		293	293
		293	293
		293	293
		293	293
		293	293
		293	293
		293	293
		293	293
		293	293
		293	293
		293	293
		293	293
		293	293
		293	293
		292	292
		292	292
		292	292
		292	292
		292	292
		292	292
		292	292
		292	292
		292	292
		292	292
		292	292
		292	292
		291	291
		291	291
		291	291
		291	291
		291	291
		291	291
		291	291
		291	291
		291	291
		291	291
		291	291
		291	291
		291	291
		291	291
		291	291
		291	291
		291	291
		291	291
		291	291
		291	291
		291	291
		291	291
		291	291
		290	290
		290	290
		290	290
		290	290
		290	290
		290	290
		290	290
		290	290
		290	290
		290	290
		290	290
		290	290
		290	290
		290	290
		290	290
		290	290
		290	290
		290	290
		290	290
		290	290
		289	289
		289	289
		289	289
		289	289
		289	289
		289	289
		289	289
		289	289
		289	289
		289	289
		289	289
		288	288
		288	288
		288	288
		288	288
		288	288
		288	288
		288	288
		288	288
		288	288
		288	288
		287	287
		287	287
		287	287
		287	287
		287	287
		287	287
		287	287
		287	287
		287	287
		287	287
		287	287
		287	287
		287	287
		287	287
		287	287
		287	287
		287	287
		287	287
		287	287
		287	287
		287	287
		287	287
		287	287
		286	286
		286	286
		286	286
		286	286
		286	286
		286	286
		286	286
		286	286
		286	286
		286	286
		286	286
		286	286
		286	286
		286	286
		286	286
		286	286
		285	285
		285	285
		285	285
		285	285
		285	285
		285	285
		285	285
		285	285
		285	285
		285	285
		285	285
		285	285
		285	285
		285	285
		285	285
		285	285
		285	285
		285	285
		285	285
		285	285
		285	285
		285	285
		285	285
		285	285
		284	284
		284	284
		284	284
		284	284
		284	284
		284	284
		284	284
		284	284
		284	284
		284	284
		284	284
		284	284
		284	284
		284	284
		284	284
		284	284
		284	284
		284	284
		284	284
		283	283
		283	283
		283	283
		283	283
		283	283
		283	283
		283	283
		283	283
		283	283
		283	283
		283	283
		283	283
		283	283
[truncated: 8,002 more rows]

## Sheet: Figure 2C
Data of genes	RiboD-PETRI of exponential period E. coli					Figure 2C
	Top 1000	Top 5000	Top 10000			The median of genes
	1359	1359	1359			Top 1000	Top 5000	Top 10000
	1321	1321	1321			362	236	188
	998	998	998
	945	945	945
	926	926	926
	926	926	926
	876	876	876
	867	867	867
	859	859	859
	852	852	852
	824	824	824
	821	821	821
	818	818	818
	815	815	815
	777	777	777
	743	743	743
	718	718	718
	716	716	716
	714	714	714
	714	714	714
	710	710	710
	707	707	707
	700	700	700
	686	686	686
	678	678	678
	678	678	678
	672	672	672
	669	669	669
	657	657	657
	637	637	637
	632	632	632
	630	630	630
	627	627	627
	626	626	626
	624	624	624
	624	624	624
	623	623	623
	622	622	622
	621	621	621
	621	621	621
	620	620	620
	618	618	618
	617	617	617
	611	611	611
	608	608	608
	606	606	606
	606	606	606
	604	604	604
	595	595	595
	593	593	593
	589	589	589
	589	589	589
	588	588	588
	586	586	586
	586	586	586
	581	581	581
	578	578	578
	575	575	575
	574	574	574
	569	569	569
	569	569	569
	564	564	564
	560	560	560
	560	560	560
	559	559	559
	559	559	559
	558	558	558
	552	552	552
	549	549	549
	549	549	549
	549	549	549
	545	545	545
	544	544	544
	544	544	544
	542	542	542
	541	541	541
	538	538	538
	538	538	538
	535	535	535
	534	534	534
	534	534	534
	533	533	533
	527	527	527
	527	527	527
	526	526	526
	526	526	526
	526	526	526
	522	522	522
	521	521	521
	520	520	520
	518	518	518
	516	516	516
	516	516	516
	515	515	515
	514	514	514
	513	513	513
	513	513	513
	512	512	512
	511	511	511
	509	509	509
	508	508	508
	507	507	507
	507	507	507
	506	506	506
	505	505	505
	505	505	505
	504	504	504
	501	501	501
	500	500	500
	499	499	499
	499	499	499
	497	497	497
	496	496	496
	495	495	495
	495	495	495
	494	494	494
	491	491	491
	491	491	491
	491	491	491
	490	490	490
	490	490	490
	489	489	489
	488	488	488
	488	488	488
	486	486	486
	485	485	485
	485	485	485
	485	485	485
	485	485	485
	484	484	484
	484	484	484
	483	483	483
	483	483	483
	483	483	483
	482	482	482
	481	481	481
	479	479	479
	478	478	478
	477	477	477
	477	477	477
	475	475	475
	475	475	475
	474	474	474
	473	473	473
	472	472	472
	472	472	472
	471	471	471
	471	471	471
	470	470	470
	469	469	469
	467	467	467
	467	467	467
	467	467	467
	464	464	464
	464	464	464
	464	464	464
	463	463	463
	462	462	462
	461	461	461
	460	460	460
	460	460	460
	460	460	460
	459	459	459
	458	458	458
	457	457	457
	457	457	457
	457	457	457
	456	456	456
	456	456	456
	456	456	456
	456	456	456
	455	455	455
	454	454	454
	454	454	454
	453	453	453
	453	453	453
	452	452	452
	452	452	452
	450	450	450
	448	448	448
	448	448	448
	448	448	448
	448	448	448
	447	447	447
	447	447	447
	447	447	447
	445	445	445
	443	443	443
	443	443	443
	442	442	442
	442	442	442
	442	442	442
	441	441	441
	440	440	440
	440	440	440
	440	440	440
	439	439	439
	438	438	438
	437	437	437
	437	437	437
	437	437	437
	436	436	436
	436	436	436
	436	436	436
	435	435	435
	435	435	435
	435	435	435
	435	435	435
	434	434	434
	434	434	434
	434	434	434
	434	434	434
	433	433	433
	432	432	432
	432	432	432
	432	432	432
	431	431	431
	431	431	431
	430	430	430
	430	430	430
	429	429	429
	428	428	428
	428	428	428
	428	428	428
	428	428	428
	426	426	426
	426	426	426
	425	425	425
	425	425	425
	425	425	425
	424	424	424
	423	423	423
	423	423	423
	422	422	422
	421	421	421
	421	421	421
	420	420	420
	420	420	420
	420	420	420
	419	419	419
	418	418	418
	418	418	418
	418	418	418
	418	418	418
	417	417	417
	417	417	417
	417	417	417
	417	417	417
	416	416	416
	415	415	415
	415	415	415
	415	415	415
	415	415	415
	414	414	414
	414	414	414
	412	412	412
	412	412	412
	411	411	411
	411	411	411
	411	411	411
	410	410	410
	410	410	410
	409	409	409
	409	409	409
	409	409	409
	408	408	408
	408	408	408
	408	408	408
	407	407	407
	407	407	407
	406	406	406
	406	406	406
	406	406	406
	406	406	406
	406	406	406
	405	405	405
	405	405	405
	404	404	404
	404	404	404
	404	404	404
	404	404	404
	404	404	404
	403	403	403
	403	403	403
	403	403	403
	403	403	403
	403	403	403
	402	402	402
	402	402	402
	401	401	401
	401	401	401
	400	400	400
	400	400	400
	400	400	400
	399	399	399
	398	398	398
	398	398	398
	398	398	398
	398	398	398
	398	398	398
	398	398	398
	397	397	397
	397	397	397
	397	397	397
	397	397	397
	397	397	397
	396	396	396
	396	396	396
	396	396	396
	396	396	396
	396	396	396
	395	395	395
	395	395	395
	395	395	395
	395	395	395
	394	394	394
	394	394	394
	394	394	394
	394	394	394
	393	393	393
	393	393	393
	393	393	393
	393	393	393
	393	393	393
	392	392	392
	392	392	392
	392	392	392
	391	391	391
	391	391	391
	391	391	391
	391	391	391
	391	391	391
	390	390	390
	390	390	390
	390	390	390
	390	390	390
	389	389	389
	389	389	389
	389	389	389
	388	388	388
	388	388	388
	388	388	388
	388	388	388
	387	387	387
	387	387	387
	387	387	387
	387	387	387
	387	387	387
	387	387	387
	386	386	386
	386	386	386
	386	386	386
	386	386	386
	386	386	386
	386	386	386
	385	385	385
	385	385	385
	384	384	384
	384	384	384
	384	384	384
	384	384	384
	384	384	384
	383	383	383
	383	383	383
	383	383	383
	383	383	383
	383	383	383
	383	383	383
	382	382	382
	382	382	382
	382	382	382
	382	382	382
	381	381	381
	381	381	381
	381	381	381
	381	381	381
	381	381	381
	381	381	381
	381	381	381
	381	381	381
	380	380	380
	380	380	380
	380	380	380
	379	379	379
	379	379	379
	379	379	379
	378	378	378
	378	378	378
	378	378	378
	378	378	378
	378	378	378
	378	378	378
	378	378	378
	378	378	378
	377	377	377
	376	376	376
	376	376	376
	376	376	376
	376	376	376
	376	376	376
	376	376	376
	376	376	376
	375	375	375
	375	375	375
	375	375	375
	375	375	375
	375	375	375
	375	375	375
	375	375	375
	375	375	375
	374	374	374
	374	374	374
	373	373	373
	373	373	373
	373	373	373
	373	373	373
	373	373	373
	373	373	373
	373	373	373
	373	373	373
	373	373	373
	372	372	372
	372	372	372
	372	372	372
	372	372	372
	372	372	372
	372	372	372
	372	372	372
	372	372	372
	372	372	372
	371	371	371
	371	371	371
	371	371	371
	370	370	370
	370	370	370
	370	370	370
	370	370	370
	370	370	370
	370	370	370
	370	370	370
	370	370	370
	369	369	369
	369	369	369
	369	369	369
	369	369	369
	369	369	369
	369	369	369
	369	369	369
	369	369	369
	368	368	368
	368	368	368
	368	368	368
	368	368	368
	368	368	368
	368	368	368
	368	368	368
	367	367	367
	367	367	367
	367	367	367
	367	367	367
	367	367	367
	367	367	367
	367	367	367
	367	367	367
	367	367	367
	367	367	367
	367	367	367
	366	366	366
	366	366	366
	366	366	366
	366	366	366
	366	366	366
	366	366	366
	366	366	366
	366	366	366
	366	366	366
	365	365	365
	365	365	365
	365	365	365
	365	365	365
	365	365	365
	365	365	365
	365	365	365
	365	365	365
	364	364	364
	364	364	364
	364	364	364
	364	364	364
	364	364	364
	363	363	363
	363	363	363
	363	363	363
	363	363	363
	363	363	363
	363	363	363
	363	363	363
	363	363	363
	363	363	363
	362	362	362
	362	362	362
	362	362	362
	362	362	362
	361	361	361
	361	361	361
	361	361	361
	361	361	361
	361	361	361
	361	361	361
	361	361	361
	360	360	360
	360	360	360
	359	359	359
	359	359	359
	359	359	359
	359	359	359
	359	359	359
	359	359	359
	359	359	359
	358	358	358
	358	358	358
	358	358	358
	358	358	358
	358	358	358
	358	358	358
	358	358	358
	357	357	357
	357	357	357
	357	357	357
	357	357	357
	356	356	356
	356	356	356
	355	355	355
	355	355	355
	355	355	355
	355	355	355
	355	355	355
	355	355	355
	355	355	355
	355	355	355
	355	355	355
	355	355	355
	354	354	354
	354	354	354
	354	354	354
	354	354	354
	354	354	354
	354	354	354
	354	354	354
	354	354	354
	353	353	353
	353	353	353
	353	353	353
	352	352	352
	352	352	352
	352	352	352
	352	352	352
	352	352	352
	352	352	352
	351	351	351
	351	351	351
	351	351	351
	351	351	351
	351	351	351
	351	351	351
	350	350	350
	350	350	350
	350	350	350
	349	349	349
	349	349	349
	349	349	349
	348	348	348
	348	348	348
	348	348	348
	348	348	348
	348	348	348
	348	348	348
	347	347	347
	347	347	347
	347	347	347
	347	347	347
	347	347	347
	347	347	347
	347	347	347
	347	347	347
	347	347	347
	346	346	346
	346	346	346
	346	346	346
	346	346	346
	346	346	346
	346	346	346
	346	346	346
	346	346	346
	346	346	346
	345	345	345
	345	345	345
	345	345	345
	345	345	345
	345	345	345
	345	345	345
	345	345	345
	345	345	345
	345	345	345
	344	344	344
	344	344	344
	344	344	344
	344	344	344
	344	344	344
	344	344	344
	344	344	344
	344	344	344
	343	343	343
	343	343	343
	343	343	343
	343	343	343
	343	343	343
	342	342	342
	342	342	342
	342	342	342
	342	342	342
	342	342	342
	341	341	341
	341	341	341
	341	341	341
	341	341	341
	341	341	341
	341	341	341
	341	341	341
	341	341	341
	341	341	341
	341	341	341
	341	341	341
	341	341	341
	341	341	341
	341	341	341
	341	341	341
	341	341	341
	341	341	341
	341	341	341
	340	340	340
	340	340	340
	340	340	340
	340	340	340
	339	339	339
	339	339	339
	339	339	339
	339	339	339
	339	339	339
	339	339	339
	339	339	339
	338	338	338
	338	338	338
	338	338	338
	338	338	338
	338	338	338
	338	338	338
	338	338	338
	337	337	337
	337	337	337
	337	337	337
	337	337	337
	337	337	337
	337	337	337
	336	336	336
	336	336	336
	336	336	336
	336	336	336
	335	335	335
	335	335	335
	335	335	335
	335	335	335
	335	335	335
	335	335	335
	335	335	335
	335	335	335
	335	335	335
	335	335	335
	335	335	335
	335	335	335
	335	335	335
	335	335	335
	335	335	335
	334	334	334
	334	334	334
	334	334	334
	334	334	334
	334	334	334
	333	333	333
	333	333	333
	333	333	333
	333	333	333
	333	333	333
	333	333	333
	333	333	333
	333	333	333
	333	333	333
	333	333	333
	332	332	332
	332	332	332
	331	331	331
	331	331	331
	331	331	331
	331	331	331
	331	331	331
	331	331	331
	331	331	331
	331	331	331
	330	330	330
	330	330	330
	330	330	330
	330	330	330
	330	330	330
	330	330	330
	330	330	330
	330	330	330
	330	330	330
	330	330	330
	330	330	330
	329	329	329
	329	329	329
	329	329	329
	329	329	329
	329	329	329
	329	329	329
	329	329	329
	329	329	329
	329	329	329
	328	328	328
	328	328	328
	328	328	328
	328	328	328
	328	328	328
	328	328	328
	328	328	328
	328	328	328
	328	328	328
	328	328	328
	328	328	328
	328	328	328
	328	328	328
	327	327	327
	327	327	327
	327	327	327
	327	327	327
	327	327	327
	327	327	327
	327	327	327
	327	327	327
	326	326	326
	326	326	326
	326	326	326
	326	326	326
	326	326	326
	326	326	326
	326	326	326
	326	326	326
	326	326	326
	326	326	326
	326	326	326
	325	325	325
	325	325	325
	325	325	325
	325	325	325
	325	325	325
	325	325	325
	325	325	325
	325	325	325
	325	325	325
	325	325	325
	325	325	325
	325	325	325
	324	324	324
	324	324	324
	324	324	324
	324	324	324
	324	324	324
	324	324	324
	323	323	323
	323	323	323
	323	323	323
	323	323	323
	323	323	323
	323	323	323
	323	323	323
	323	323	323
	323	323	323
	323	323	323
	323	323	323
	323	323	323
	323	323	323
	323	323	323
	322	322	322
	322	322	322
	322	322	322
	322	322	322
	322	322	322
	322	322	322
	322	322	322
	322	322	322
	322	322	322
	321	321	321
	321	321	321
	321	321	321
	321	321	321
	321	321	321
	321	321	321
	321	321	321
	321	321	321
	321	321	321
	321	321	321
	321	321	321
	321	321	321
	321	321	321
	321	321	321
	321	321	321
	321	321	321
	321	321	321
	320	320	320
	320	320	320
	320	320	320
	320	320	320
	320	320	320
	320	320	320
	320	320	320
	320	320	320
	320	320	320
	320	320	320
	320	320	320
	320	320	320
	320	320	320
	320	320	320
	320	320	320
	320	320	320
	319	319	319
	319	319	319
	319	319	319
	319	319	319
	319	319	319
	319	319	319
	319	319	319
	319	319	319
	319	319	319
	319	319	319
	319	319	319
	319	319	319
	318	318	318
	318	318	318
	318	318	318
	318	318	318
	318	318	318
	318	318	318
	318	318	318
	318	318	318
	318	318	318
	318	318	318
	318	318	318
	318	318	318
	317	317	317
	317	317	317
	317	317	317
	317	317	317
	317	317	317
	317	317	317
	317	317	317
	316	316	316
	316	316	316
	316	316	316
	316	316	316
	316	316	316
	316	316	316
	316	316	316
	316	316	316
	315	315	315
	315	315	315
	315	315	315
	315	315	315
	314	314	314
	314	314	314
	314	314	314
	314	314	314
	314	314	314
	314	314	314
	314	314	314
	314	314	314
	313	313	313
	313	313	313
	313	313	313
	313	313	313
	313	313	313
	313	313	313
	313	313	313
	313	313	313
	313	313	313
	313	313	313
	312	312	312
	312	312	312
	312	312	312
	312	312	312
	312	312	312
	312	312	312
	311	311	311
	311	311	311
	311	311	311
	311	311	311
	311	311	311
	311	311	311
	311	311	311
	311	311	311
	311	311	311
	311	311	311
	311	311	311
	310	310	310
	310	310	310
	310	310	310
	310	310	310
	310	310	310
	310	310	310
	310	310	310
	310	310	310
	310	310	310
	310	310	310
	310	310	310
	309	309	309
	309	309	309
	309	309	309
	309	309	309
	309	309	309
	309	309	309
	309	309	309
	309	309	309
	309	309	309
	309	309	309
	309	309	309
	309	309	309
	308	308	308
	308	308	308
	308	308	308
	308	308	308
	308	308	308
	308	308	308
	308	308	308
	308	308	308
	308	308	308
	308	308	308
	308	308	308
	307	307	307
	307	307	307
	307	307	307
	307	307	307
	307	307	307
	307	307	307
	307	307	307
	307	307	307
	307	307	307
	307	307	307
	307	307	307
	307	307	307
	306	306	306
	306	306	306
	306	306	306
	306	306	306
	306	306	306
	306	306	306
	306	306	306
	306	306	306
	305	305	305
	305	305	305
	305	305	305
	305	305	305
	305	305	305
	305	305	305
	305	305	305
	305	305	305
	305	305	305
	305	305	305
	305	305	305
	304	304	304
	304	304	304
	304	304	304
	304	304	304
	304	304	304
	304	304	304
	304	304	304
	304	304	304
	303	303	303
	303	303	303
	303	303	303
	303	303	303
	303	303	303
	303	303	303
	303	303	303
	303	303	303
	302	302	302
	302	302	302
	302	302	302
	302	302	302
	302	302	302
	302	302	302
	302	302	302
	302	302	302
		302	302
		302	302
		302	302
		301	301
		301	301
		301	301
		301	301
		301	301
		301	301
		301	301
		301	301
		300	300
		300	300
		300	300
		300	300
		300	300
		300	300
		300	300
		300	300
		300	300
		299	299
		299	299
		299	299
		299	299
		299	299
		299	299
		299	299
		299	299
		299	299
		299	299
		299	299
		298	298
		298	298
		298	298
		298	298
		298	298
		298	298
		298	298
		298	298
		298	298
		298	298
		298	298
		298	298
		298	298
		298	298
		298	298
		298	298
		298	298
		297	297
		297	297
		297	297
		297	297
		297	297
		297	297
		297	297
		297	297
		297	297
		297	297
		297	297
		297	297
		297	297
		297	297
		297	297
		297	297
		296	296
		296	296
		296	296
		296	296
		296	296
		296	296
		296	296
		296	296
		296	296
		296	296
		296	296
		296	296
		296	296
		296	296
		295	295
		295	295
		295	295
		295	295
		295	295
		295	295
		295	295
		295	295
		295	295
		295	295
		295	295
		295	295
		295	295
		294	294
		294	294
		294	294
		294	294
		294	294
		294	294
		294	294
		294	294
		294	294
		294	294
		294	294
		294	294
		294	294
		294	294
		294	294
		294	294
		293	293
		293	293
		293	293
		293	293
		293	293
		293	293
		293	293
		293	293
		293	293
		293	293
		293	293
		293	293
		293	293
		293	293
		293	293
		292	292
		292	292
		292	292
		292	292
		292	292
		292	292
		292	292
		292	292
		292	292
		292	292
		292	292
		292	292
		292	292
		292	292
		292	292
		291	291
		291	291
		291	291
		291	291
		291	291
		291	291
		291	291
		291	291
		291	291
		291	291
		291	291
		291	291
		290	290
		290	290
		290	290
		290	290
		290	290
		290	290
		290	290
		290	290
		290	290
		290	290
		290	290
		290	290
		290	290
		290	290
		290	290
		290	290
		290	290
		289	289
		289	289
		289	289
		289	289
		289	289
		289	289
		289	289
		289	289
		289	289
		289	289
		289	289
		289	289
		289	289
		289	289
		288	288
		288	288
		288	288
		288	288
		288	288
		288	288
		288	288
		288	288
		288	288
		288	288
		288	288
		288	288
		287	287
		287	287
		287	287
		287	287
		287	287
		287	287
		287	287
		287	287
		287	287
		287	287
		287	287
		287	287
		287	287
		287	287
		287	287
		287	287
		287	287
		286	286
		286	286
		286	286
		286	286
		286	286
		286	286
		286	286
		286	286
		286	286
		285	285
		285	285
		285	285
		285	285
		285	285
		285	285
		285	285
		285	285
		285	285
		285	285
		285	285
		285	285
		285	285
		285	285
		284	284
		284	284
		284	284
		284	284
		284	284
		284	284
		284	284
		284	284
		284	284
		284	284
		284	284
		284	284
		284	284
		284	284
		284	284
		284	284
		284	284
		284	284
		283	283
		283	283
		283	283
		283	283
		283	283
		283	283
		283	283
		283	283
		283	283
		283	283
		283	283
		283	283
		283	283
		283	283
		283	283
		283	283
		283	283
		283	283
		283	283
		282	282
		282	282
		282	282
		282	282
		282	282
		282	282
		282	282
		282	282
		282	282
		282	282
		282	282
		282	282
		282	282
		282	282
		282	282
		282	282
		282	282
		282	282
		282	282
		282	282
		282	282
		282	282
		282	282
		282	282
		281	281
		281	281
		281	281
		281	281
		281	281
		281	281
		281	281
		281	281
		281	281
		281	281
		281	281
		281	281
		281	281
		281	281
		281	281
		281	281
		281	281
		281	281
		281	281
		281	281
		281	281
		281	281
		280	280
		280	280
		280	280
		280	280
		280	280
		280	280
		280	280
		280	280
		280	280
		280	280
		280	280
		280	280
		280	280
		280	280
		280	280
		280	280
		280	280
		280	280
		280	280
		280	280
		279	279
		279	279
		279	279
		279	279
		279	279
		279	279
		279	279
		279	279
		279	279
		279	279
		279	279
		279	279
		279	279
		278	278
		278	278
		278	278
		278	278
		278	278
		278	278
		278	278
		278	278
		278	278
		277	277
		277	277
		277	277
		277	277
		277	277
		277	277
		277	277
		277	277
		277	277
		277	277
		277	277
		277	277
		277	277
		277	277
		276	276
		276	276
		276	276
		276	276
		276	276
		276	276
		276	276
		276	276
		276	276
		276	276
		276	276
		276	276
		276	276
		276	276
		276	276
		276	276
		276	276
		275	275
		275	275
		275	275
		275	275
		275	275
		275	275
		275	275
		275	275
		275	275
		275	275
		275	275
		275	275
		275	275
		275	275
		275	275
		275	275
		275	275
		275	275
		275	275
		275	275
		275	275
		275	275
		275	275
		275	275
		275	275
		275	275
		275	275
		275	275
		275	275
		275	275
		275	275
		274	274
		274	274
		274	274
		274	274
		274	274
		274	274
		274	274
		274	274
		274	274
		274	274
		274	274
		274	274
		274	274
		273	273
		273	273
		273	273
		273	273
		273	273
		273	273
		273	273
		273	273
		273	273
		273	273
		273	273
		273	273
		273	273
		273	273
		273	273
		273	273
		272	272
		272	272
		272	272
		272	272
		272	272
		272	272
		272	272
		272	272
		272	272
		272	272
		272	272
		272	272
		272	272
		272	272
		272	272
		272	272
		272	272
		272	272
		272	272
		272	272
		272	272
		272	272
		271	271
		271	271
		271	271
		271	271
		271	271
		271	271
		271	271
		271	271
		271	271
		271	271
		271	271
		271	271
		271	271
		271	271
		271	271
		271	271
		271	271
		271	271
		271	271
		271	271
		271	271
		270	270
		270	270
		270	270
		270	270
		270	270
		270	270
		270	270
		270	270
		270	270
		270	270
		270	270
		270	270
		270	270
		270	270
		270	270
		270	270
		270	270
		269	269
		269	269
		269	269
		269	269
		269	269
		269	269
		269	269
		269	269
		269	269
		269	269
		269	269
		269	269
		269	269
		269	269
		269	269
		269	269
		269	269
		269	269
		269	269
		269	269
		269	269
		269	269
		269	269
		268	268
		268	268
		268	268
		268	268
		268	268
		268	268
		268	268
		268	268
		268	268
		268	268
		268	268
		268	268
		268	268
		268	268
		268	268
		268	268
		268	268
		268	268
		268	268
		268	268
		268	268
		268	268
		267	267
		267	267
		267	267
		267	267
		267	267
		267	267
		267	267
		267	267
		267	267
		267	267
		267	267
		267	267
		267	267
		267	267
		267	267
		267	267
		267	267
		267	267
		267	267
		267	267
		267	267
		267	267
		267	267
		267	267
		267	267
		267	267
		267	267
		267	267
		267	267
		267	267
		267	267
		266	266
		266	266
		266	266
		266	266
		266	266
		266	266
		266	266
		266	266
		266	266
		266	266
		266	266
		266	266
		266	266
		266	266
		266	266
		266	266
		266	266
		266	266
		266	266
		266	266
		266	266
		266	266
		266	266
		266	266
		266	266
		266	266
		265	265
		265	265
		265	265
		265	265
		265	265
		265	265
		265	265
		265	265
		265	265
		265	265
		265	265
		265	265
		265	265
		265	265
		265	265
		265	265
		265	265
		265	265
		265	265
		265	265
		265	265
		265	265
		264	264
		264	264
		264	264
		264	264
		264	264
		264	264
		264	264
		264	264
		264	264
		264	264
		264	264
		264	264
		264	264
		264	264
		264	264
		264	264
		264	264
		264	264
		264	264
		264	264
		264	264
		264	264
		264	264
		264	264
		264	264
		263	263
		263	263
		263	263
		263	263
		263	263
		263	263
		263	263
		263	263
		263	263
		263	263
		263	263
		263	263
		263	263
		263	263
		263	263
		263	263
		263	263
		263	263
		263	263
		263	263
		263	263
		262	262
		262	262
		262	262
		262	262
		262	262
		262	262
		262	262
		262	262
		262	262
		262	262
		262	262
		262	262
		262	262
		262	262
		262	262
		262	262
		262	262
		262	262
		262	262
		262	262
		262	262
		262	262
		261	261
		261	261
		261	261
		261	261
		261	261
		261	261
		261	261
		261	261
		261	261
		261	261
		261	261
		261	261
		261	261
		261	261
		261	261
		261	261
		261	261
		261	261
		261	261
		260	260
		260	260
		260	260
		260	260
		260	260
		260	260
		260	260
		260	260
		260	260
		260	260
		260	260
		260	260
		260	260
		260	260
		260	260
		260	260
		260	260
		260	260
		260	260
		260	260
		260	260
		260	260
		260	260
		260	260
		260	260
		260	260
		260	260
		260	260
		260	260
		260	260
		260	260
		259	259
		259	259
		259	259
		259	259
		259	259
		259	259
		259	259
		259	259
		259	259
		259	259
		259	259
		259	259
		259	259
		259	259
		259	259
		259	259
		259	259
		259	259
		259	259
		259	259
		259	259
		259	259
		259	259
		259	259
		259	259
		259	259
		259	259
		259	259
		259	259
		259	259
		259	259
		259	259
		259	259
		259	259
		259	259
		258	258
		258	258
		258	258
		258	258
		258	258
		258	258
		258	258
		258	258
		258	258
		258	258
		258	258
		258	258
		258	258
		258	258
		258	258
		258	258
		258	258
		258	258
		258	258
		258	258
		258	258
		258	258
		257	257
		257	257
		257	257
		257	257
		257	257
		257	257
		257	257
		257	257
		257	257
		257	257
		257	257
		257	257
		257	257
		257	257
		257	257
		257	257
		257	257
		257	257
		257	257
		257	257
		257	257
		257	257
		257	257
		257	257
		257	257
		256	256
		256	256
		256	256
		256	256
		256	256
		256	256
		256	256
		256	256
		256	256
		256	256
		256	256
		256	256
		256	256
		256	256
		256	256
		256	256
		256	256
		256	256
		256	256
		256	256
		256	256
		256	256
		255	255
		255	255
		255	255
		255	255
		255	255
		255	255
		255	255
		255	255
		255	255
		255	255
		255	255
		255	255
		255	255
		255	255
		255	255
		255	255
		255	255
		255	255
		255	255
		255	255
		255	255
		255	255
		255	255
		255	255
		255	255
		255	255
		255	255
		255	255
		255	255
		255	255
		255	255
		255	255
		254	254
		254	254
		254	254
		254	254
		254	254
		254	254
		254	254
		254	254
		254	254
		254	254
		254	254
		254	254
		254	254
		254	254
		254	254
		254	254
		254	254
		254	254
		254	254
		254	254
		254	254
		254	254
		254	254
		254	254
		254	254
		254	254
		254	254
		254	254
		254	254
		253	253
		253	253
		253	253
		253	253
		253	253
		253	253
		253	253
		253	253
		253	253
		253	253
		253	253
		253	253
		253	253
		253	253
		253	253
		253	253
		253	253
		253	253
		253	253
		253	253
		253	253
		253	253
		253	253
		253	253
		253	253
		253	253
		253	253
		253	253
		253	253
		253	253
		253	253
		253	253
		253	253
		253	253
		252	252
		252	252
		252	252
		252	252
		252	252
		252	252
		252	252
		252	252
		252	252
		252	252
		252	252
		252	252
		252	252
		252	252
		252	252
		252	252
		252	252
		252	252
		252	252
		252	252
		252	252
		252	252
		252	252
		252	252
		252	252
		252	252
		252	252
		252	252
		252	252
		252	252
		252	252
		251	251
		251	251
		251	251
		251	251
		251	251
		251	251
		251	251
		251	251
		251	251
		251	251
		251	251
		251	251
		251	251
		251	251
		251	251
		251	251
		251	251
		251	251
[truncated: 8,002 more rows]
