# Supplementary material for: An improved bacterial single-cell RNA-seq reveals biofilm heterogeneity
Source: eLife. 2024 Dec 17;13:RP97543. doi: 10.7554/eLife.97543 (PMC11651652; doi:10.7554/eLife.97543)
Supplement: Figure 3—figure supplement 1—source data 1. [file elife-97543-fig3-figsupp1-data1.xls]

## Sheet: Figure 3-figure supplement 1A
Correlation analysis between UMI and reads of cells	Data of static E. coli biofilms sample1			Data of static E. coli biofilms sample2				Figure 3-figure supplement 1A. Pearson correlation coefficient
	cell barcodes	UMIs	reads	cell barcodes	UMIs	reads		Sample	Sample estimates	p-value
	1214-7_bc1_1_bc2_10_bc3_33	13	37	1214-8_bc1_1_bc2_10_bc3_12	17	17		sample 1	cor=0.87	< 2.2e-16
	1214-7_bc1_1_bc2_11_bc3_32	4	21	1214-8_bc1_1_bc2_10_bc3_31	3	17		sample 2	cor=0.90	< 2.2e-16
	1214-7_bc1_1_bc2_11_bc3_71	1	8	1214-8_bc1_1_bc2_10_bc3_33	111	10930
	1214-7_bc1_1_bc2_12_bc3_32	7	37	1214-8_bc1_1_bc2_10_bc3_60	25	26
	1214-7_bc1_1_bc2_12_bc3_35	12	13	1214-8_bc1_1_bc2_10_bc3_74	85	9680
	1214-7_bc1_1_bc2_12_bc3_68	5	6	1214-8_bc1_1_bc2_11_bc3_32	76	10806
	1214-7_bc1_1_bc2_12_bc3_95	11	44	1214-8_bc1_1_bc2_11_bc3_71	76	5060
	1214-7_bc1_1_bc2_15_bc3_8	27	30	1214-8_bc1_1_bc2_12_bc3_32	184	13244
	1214-7_bc1_1_bc2_15_bc3_96	2	2	1214-8_bc1_1_bc2_12_bc3_33	28	31
	1214-7_bc1_1_bc2_16_bc3_60	15	27	1214-8_bc1_1_bc2_12_bc3_69	6	6
	1214-7_bc1_1_bc2_16_bc3_61	273	24771	1214-8_bc1_1_bc2_12_bc3_73	7	7
	1214-7_bc1_1_bc2_16_bc3_66	15	86	1214-8_bc1_1_bc2_12_bc3_8	3	5
	1214-7_bc1_1_bc2_18_bc3_19	26	30	1214-8_bc1_1_bc2_12_bc3_91	5	6
	1214-7_bc1_1_bc2_18_bc3_20	1	1	1214-8_bc1_1_bc2_12_bc3_95	365	33719
	1214-7_bc1_1_bc2_18_bc3_28	4	5	1214-8_bc1_1_bc2_14_bc3_54	55	63
	1214-7_bc1_1_bc2_18_bc3_3	1	1	1214-8_bc1_1_bc2_15_bc3_48	6	6
	1214-7_bc1_1_bc2_18_bc3_43	787	25119	1214-8_bc1_1_bc2_15_bc3_67	2	2
	1214-7_bc1_1_bc2_18_bc3_55	3	3	1214-8_bc1_1_bc2_15_bc3_69	4	6
	1214-7_bc1_1_bc2_18_bc3_56	25	31	1214-8_bc1_1_bc2_15_bc3_74	19	20
	1214-7_bc1_1_bc2_18_bc3_66	1	1	1214-8_bc1_1_bc2_16_bc3_11	4	8
	1214-7_bc1_1_bc2_18_bc3_75	1	1	1214-8_bc1_1_bc2_16_bc3_14	7	11
	1214-7_bc1_1_bc2_18_bc3_84	2	2	1214-8_bc1_1_bc2_16_bc3_15	5	7
	1214-7_bc1_1_bc2_19_bc3_36	2	7	1214-8_bc1_1_bc2_16_bc3_18	7	8
	1214-7_bc1_1_bc2_2_bc3_93	7	40	1214-8_bc1_1_bc2_16_bc3_22	5	5
	1214-7_bc1_1_bc2_22_bc3_66	19	20	1214-8_bc1_1_bc2_16_bc3_23	4	5
	1214-7_bc1_1_bc2_24_bc3_18	199	5502	1214-8_bc1_1_bc2_16_bc3_27	1	1
	1214-7_bc1_1_bc2_24_bc3_57	1	1	1214-8_bc1_1_bc2_16_bc3_3	6	7
	1214-7_bc1_1_bc2_24_bc3_65	274	12592	1214-8_bc1_1_bc2_16_bc3_30	1	1
	1214-7_bc1_1_bc2_24_bc3_72	5	6	1214-8_bc1_1_bc2_16_bc3_34	5	7
	1214-7_bc1_1_bc2_25_bc3_23	1	1	1214-8_bc1_1_bc2_16_bc3_37	14	2559
	1214-7_bc1_1_bc2_25_bc3_3	128	144	1214-8_bc1_1_bc2_16_bc3_52	3	4
	1214-7_bc1_1_bc2_25_bc3_61	30	2437	1214-8_bc1_1_bc2_16_bc3_54	25	27
	1214-7_bc1_1_bc2_26_bc3_57	1	1	1214-8_bc1_1_bc2_16_bc3_56	19	21
	1214-7_bc1_1_bc2_26_bc3_59	6	6	1214-8_bc1_1_bc2_16_bc3_59	5	5
	1214-7_bc1_1_bc2_27_bc3_92	232	266	1214-8_bc1_1_bc2_16_bc3_60	3	3
	1214-7_bc1_1_bc2_28_bc3_1	3	3	1214-8_bc1_1_bc2_16_bc3_61	103	4259
	1214-7_bc1_1_bc2_28_bc3_14	6	12	1214-8_bc1_1_bc2_16_bc3_63	2	2
	1214-7_bc1_1_bc2_28_bc3_60	4	12	1214-8_bc1_1_bc2_16_bc3_66	889	58758
	1214-7_bc1_1_bc2_3_bc3_2	3	7	1214-8_bc1_1_bc2_16_bc3_69	2	2
	1214-7_bc1_1_bc2_30_bc3_96	1	4	1214-8_bc1_1_bc2_16_bc3_73	5	5
	1214-7_bc1_1_bc2_31_bc3_94	257	7596	1214-8_bc1_1_bc2_16_bc3_75	1	1
	1214-7_bc1_1_bc2_32_bc3_24	1	1	1214-8_bc1_1_bc2_16_bc3_78	5	5
	1214-7_bc1_1_bc2_32_bc3_33	2	11	1214-8_bc1_1_bc2_16_bc3_79	20	23
	1214-7_bc1_1_bc2_33_bc3_39	12	19	1214-8_bc1_1_bc2_16_bc3_82	9	10
	1214-7_bc1_1_bc2_33_bc3_67	46	55	1214-8_bc1_1_bc2_16_bc3_85	4	6
	1214-7_bc1_1_bc2_35_bc3_28	5	5	1214-8_bc1_1_bc2_16_bc3_86	2	2
	1214-7_bc1_1_bc2_35_bc3_40	2	2	1214-8_bc1_1_bc2_16_bc3_89	2	2
	1214-7_bc1_1_bc2_35_bc3_45	2	10	1214-8_bc1_1_bc2_16_bc3_93	4	4
	1214-7_bc1_1_bc2_35_bc3_49	1	1	1214-8_bc1_1_bc2_16_bc3_94	4	5
	1214-7_bc1_1_bc2_35_bc3_68	729	22889	1214-8_bc1_1_bc2_16_bc3_96	8	10
	1214-7_bc1_1_bc2_35_bc3_7	6	20	1214-8_bc1_1_bc2_18_bc3_19	1	2
	1214-7_bc1_1_bc2_35_bc3_70	2	2	1214-8_bc1_1_bc2_18_bc3_43	11	24
	1214-7_bc1_1_bc2_35_bc3_72	2	2	1214-8_bc1_1_bc2_18_bc3_9	13	13
	1214-7_bc1_1_bc2_35_bc3_82	2	4	1214-8_bc1_1_bc2_19_bc3_36	55	4446
	1214-7_bc1_1_bc2_35_bc3_84	1	1	1214-8_bc1_1_bc2_2_bc3_30	3	3
	1214-7_bc1_1_bc2_35_bc3_88	1	1	1214-8_bc1_1_bc2_2_bc3_70	1	1
	1214-7_bc1_1_bc2_39_bc3_14	2	2	1214-8_bc1_1_bc2_2_bc3_83	4	7
	1214-7_bc1_1_bc2_39_bc3_28	21	25	1214-8_bc1_1_bc2_2_bc3_93	487	24655
	1214-7_bc1_1_bc2_39_bc3_44	271	24597	1214-8_bc1_1_bc2_20_bc3_58	3	3
	1214-7_bc1_1_bc2_39_bc3_9	7	20	1214-8_bc1_1_bc2_21_bc3_21	20	21
	1214-7_bc1_1_bc2_4_bc3_39	2	4	1214-8_bc1_1_bc2_22_bc3_57	2	4
	1214-7_bc1_1_bc2_4_bc3_85	27	30	1214-8_bc1_1_bc2_22_bc3_6	19	21
	1214-7_bc1_1_bc2_40_bc3_75	9	9	1214-8_bc1_1_bc2_22_bc3_82	9	10
	1214-7_bc1_1_bc2_43_bc3_2	3	4	1214-8_bc1_1_bc2_24_bc3_18	2	3
	1214-7_bc1_1_bc2_44_bc3_69	2	15	1214-8_bc1_1_bc2_24_bc3_65	4	12
	1214-7_bc1_1_bc2_44_bc3_87	1	3	1214-8_bc1_1_bc2_25_bc3_57	1	1
	1214-7_bc1_1_bc2_46_bc3_16	4	7	1214-8_bc1_1_bc2_26_bc3_40	4	7
	1214-7_bc1_1_bc2_47_bc3_32	5	34	1214-8_bc1_1_bc2_26_bc3_5	3	3
	1214-7_bc1_1_bc2_47_bc3_43	1	4	1214-8_bc1_1_bc2_26_bc3_8	5	5
	1214-7_bc1_1_bc2_47_bc3_50	137	155	1214-8_bc1_1_bc2_27_bc3_15	1	2
	1214-7_bc1_1_bc2_48_bc3_73	3	19	1214-8_bc1_1_bc2_27_bc3_22	17	18
	1214-7_bc1_1_bc2_5_bc3_37	25	29	1214-8_bc1_1_bc2_27_bc3_80	6	9
	1214-7_bc1_1_bc2_51_bc3_66	4	12	1214-8_bc1_1_bc2_27_bc3_92	1	1
	1214-7_bc1_1_bc2_53_bc3_78	4	15	1214-8_bc1_1_bc2_28_bc3_14	93	11408
	1214-7_bc1_1_bc2_53_bc3_88	3	11	1214-8_bc1_1_bc2_28_bc3_42	14	17
	1214-7_bc1_1_bc2_54_bc3_94	6	40	1214-8_bc1_1_bc2_28_bc3_60	343	14581
	1214-7_bc1_1_bc2_54_bc3_95	1	6	1214-8_bc1_1_bc2_3_bc3_2	54	7609
	1214-7_bc1_1_bc2_55_bc3_25	4	17	1214-8_bc1_1_bc2_30_bc3_96	56	2387
	1214-7_bc1_1_bc2_56_bc3_72	319	7502	1214-8_bc1_1_bc2_31_bc3_40	2	2
	1214-7_bc1_1_bc2_56_bc3_76	16	98	1214-8_bc1_1_bc2_31_bc3_89	12	13
	1214-7_bc1_1_bc2_57_bc3_56	3	3	1214-8_bc1_1_bc2_31_bc3_94	4	6
	1214-7_bc1_1_bc2_58_bc3_64	238	271	1214-8_bc1_1_bc2_32_bc3_33	47	5545
	1214-7_bc1_1_bc2_6_bc3_40	7	34	1214-8_bc1_1_bc2_33_bc3_13	6	6
	1214-7_bc1_1_bc2_61_bc3_7	27	28	1214-8_bc1_1_bc2_33_bc3_38	68	73
	1214-7_bc1_1_bc2_61_bc3_92	25	45	1214-8_bc1_1_bc2_33_bc3_63	6	2564
	1214-7_bc1_1_bc2_65_bc3_1	11	11	1214-8_bc1_1_bc2_33_bc3_76	2	2
	1214-7_bc1_1_bc2_65_bc3_16	49	54	1214-8_bc1_1_bc2_34_bc3_41	3	3
	1214-7_bc1_1_bc2_65_bc3_24	280	20849	1214-8_bc1_1_bc2_34_bc3_5	3	3
	1214-7_bc1_1_bc2_65_bc3_45	4	16	1214-8_bc1_1_bc2_34_bc3_57	55	4117
	1214-7_bc1_1_bc2_65_bc3_66	6	6	1214-8_bc1_1_bc2_34_bc3_76	118	131
	1214-7_bc1_1_bc2_65_bc3_79	3	3	1214-8_bc1_1_bc2_35_bc3_16	26	29
	1214-7_bc1_1_bc2_65_bc3_90	4	4	1214-8_bc1_1_bc2_35_bc3_26	4	4
	1214-7_bc1_1_bc2_66_bc3_65	15	16	1214-8_bc1_1_bc2_35_bc3_37	7	7
	1214-7_bc1_1_bc2_68_bc3_82	153	7676	1214-8_bc1_1_bc2_35_bc3_45	45	4068
	1214-7_bc1_1_bc2_69_bc3_14	3	5	1214-8_bc1_1_bc2_35_bc3_58	2	2
	1214-7_bc1_1_bc2_73_bc3_20	2	2	1214-8_bc1_1_bc2_35_bc3_68	7	9
	1214-7_bc1_1_bc2_73_bc3_54	1	1	1214-8_bc1_1_bc2_37_bc3_12	15	1547
	1214-7_bc1_1_bc2_73_bc3_64	15	16	1214-8_bc1_1_bc2_37_bc3_70	4	4
	1214-7_bc1_1_bc2_73_bc3_67	442	27235	1214-8_bc1_1_bc2_37_bc3_80	2	2
	1214-7_bc1_1_bc2_73_bc3_86	2	2	1214-8_bc1_1_bc2_38_bc3_15	10	10
	1214-7_bc1_1_bc2_74_bc3_72	15	97	1214-8_bc1_1_bc2_38_bc3_72	17	2468
	1214-7_bc1_1_bc2_75_bc3_34	4	31	1214-8_bc1_1_bc2_39_bc3_44	5	10
	1214-7_bc1_1_bc2_75_bc3_95	199	10164	1214-8_bc1_1_bc2_39_bc3_76	3	8
	1214-7_bc1_1_bc2_76_bc3_14	2	3	1214-8_bc1_1_bc2_39_bc3_9	205	34742
	1214-7_bc1_1_bc2_76_bc3_23	115	596	1214-8_bc1_1_bc2_4_bc3_39	35	4226
	1214-7_bc1_1_bc2_76_bc3_24	21	24	1214-8_bc1_1_bc2_40_bc3_89	3	3
	1214-7_bc1_1_bc2_77_bc3_67	17	19	1214-8_bc1_1_bc2_43_bc3_95	14	15
	1214-7_bc1_1_bc2_77_bc3_76	1	1	1214-8_bc1_1_bc2_44_bc3_37	3	3
	1214-7_bc1_1_bc2_77_bc3_82	7	27	1214-8_bc1_1_bc2_44_bc3_68	1	2
	1214-7_bc1_1_bc2_77_bc3_9	3	3	1214-8_bc1_1_bc2_44_bc3_69	97	2910
	1214-7_bc1_1_bc2_78_bc3_48	61	71	1214-8_bc1_1_bc2_44_bc3_87	47	3081
	1214-7_bc1_1_bc2_8_bc3_27	5	9	1214-8_bc1_1_bc2_46_bc3_16	106	6898
	1214-7_bc1_1_bc2_80_bc3_16	51	63	1214-8_bc1_1_bc2_46_bc3_63	13	17
	1214-7_bc1_1_bc2_80_bc3_24	3	13	1214-8_bc1_1_bc2_47_bc3_22	3	4
	1214-7_bc1_1_bc2_82_bc3_57	1	4	1214-8_bc1_1_bc2_47_bc3_32	98	11644
	1214-7_bc1_1_bc2_83_bc3_69	24	25	1214-8_bc1_1_bc2_47_bc3_37	10	10
	1214-7_bc1_1_bc2_84_bc3_69	267	7429	1214-8_bc1_1_bc2_47_bc3_50	1	1
	1214-7_bc1_1_bc2_84_bc3_95	15	17	1214-8_bc1_1_bc2_48_bc3_48	4	7
	1214-7_bc1_1_bc2_85_bc3_40	5	10	1214-8_bc1_1_bc2_48_bc3_58	3	10
	1214-7_bc1_1_bc2_85_bc3_8	1	1	1214-8_bc1_1_bc2_48_bc3_73	236	21221
	1214-7_bc1_1_bc2_86_bc3_51	7	9	1214-8_bc1_1_bc2_50_bc3_80	7	7
	1214-7_bc1_1_bc2_89_bc3_73	1	1	1214-8_bc1_1_bc2_51_bc3_66	72	6458
	1214-7_bc1_1_bc2_89_bc3_77	1	1	1214-8_bc1_1_bc2_51_bc3_91	60	3236
	1214-7_bc1_1_bc2_9_bc3_71	25	32	1214-8_bc1_1_bc2_53_bc3_61	10	11
	1214-7_bc1_1_bc2_9_bc3_73	18	22	1214-8_bc1_1_bc2_53_bc3_66	1	1
	1214-7_bc1_1_bc2_90_bc3_60	8	8	1214-8_bc1_1_bc2_53_bc3_72	3	3
	1214-7_bc1_1_bc2_90_bc3_66	13	13	1214-8_bc1_1_bc2_53_bc3_75	4	7
	1214-7_bc1_1_bc2_90_bc3_90	21	22	1214-8_bc1_1_bc2_53_bc3_78	159	8506
	1214-7_bc1_1_bc2_91_bc3_78	454	9536	1214-8_bc1_1_bc2_53_bc3_80	1	2
	1214-7_bc1_1_bc2_93_bc3_91	278	9086	1214-8_bc1_1_bc2_53_bc3_88	117	3049
	1214-7_bc1_1_bc2_94_bc3_6	28	35	1214-8_bc1_1_bc2_53_bc3_93	2	2
	1214-7_bc1_1_bc2_94_bc3_85	2	10	1214-8_bc1_1_bc2_54_bc3_62	3	3
	1214-7_bc1_1_bc2_96_bc3_57	2	6	1214-8_bc1_1_bc2_54_bc3_75	6	7
	1214-7_bc1_1_bc2_96_bc3_78	93	106	1214-8_bc1_1_bc2_54_bc3_77	4	7
	1214-7_bc1_10_bc2_11_bc3_80	3	3	1214-8_bc1_1_bc2_54_bc3_89	7	8
	1214-7_bc1_10_bc2_12_bc3_17	6	9	1214-8_bc1_1_bc2_54_bc3_94	320	37534
	1214-7_bc1_10_bc2_14_bc3_69	173	197	1214-8_bc1_1_bc2_54_bc3_95	111	4339
	1214-7_bc1_10_bc2_14_bc3_96	12	17	1214-8_bc1_1_bc2_55_bc3_25	61	7325
	1214-7_bc1_10_bc2_16_bc3_37	7	45	1214-8_bc1_1_bc2_55_bc3_26	3	3
	1214-7_bc1_10_bc2_16_bc3_39	3	19	1214-8_bc1_1_bc2_55_bc3_44	17	4985
	1214-7_bc1_10_bc2_16_bc3_76	3	11	1214-8_bc1_1_bc2_55_bc3_79	40	1014
	1214-7_bc1_10_bc2_16_bc3_93	1	11	1214-8_bc1_1_bc2_56_bc3_72	2	2
	1214-7_bc1_10_bc2_18_bc3_16	1	4	1214-8_bc1_1_bc2_6_bc3_29	3	3
	1214-7_bc1_10_bc2_18_bc3_25	8	47	1214-8_bc1_1_bc2_6_bc3_34	5	5
	1214-7_bc1_10_bc2_19_bc3_93	209	20876	1214-8_bc1_1_bc2_6_bc3_40	377	29044
	1214-7_bc1_10_bc2_2_bc3_24	1	1	1214-8_bc1_1_bc2_60_bc3_80	1	1
	1214-7_bc1_10_bc2_2_bc3_60	505	11311	1214-8_bc1_1_bc2_60_bc3_85	6	8
	1214-7_bc1_10_bc2_2_bc3_92	5	7	1214-8_bc1_1_bc2_61_bc3_25	15	18
	1214-7_bc1_10_bc2_21_bc3_13	25	50	1214-8_bc1_1_bc2_63_bc3_18	4	5
	1214-7_bc1_10_bc2_21_bc3_29	4	13	1214-8_bc1_1_bc2_64_bc3_24	4	4
	1214-7_bc1_10_bc2_21_bc3_30	5	28	1214-8_bc1_1_bc2_64_bc3_26	43	47
	1214-7_bc1_10_bc2_21_bc3_62	4	19	1214-8_bc1_1_bc2_65_bc3_24	5	12
	1214-7_bc1_10_bc2_24_bc3_11	7	50	1214-8_bc1_1_bc2_65_bc3_43	9	10
	1214-7_bc1_10_bc2_24_bc3_38	30	35	1214-8_bc1_1_bc2_65_bc3_45	80	3108
	1214-7_bc1_10_bc2_24_bc3_77	33	50	1214-8_bc1_1_bc2_65_bc3_48	8	8
	1214-7_bc1_10_bc2_25_bc3_26	214	4107	1214-8_bc1_1_bc2_65_bc3_72	3	4
	1214-7_bc1_10_bc2_25_bc3_33	2	18	1214-8_bc1_1_bc2_67_bc3_1	6	6
	1214-7_bc1_10_bc2_25_bc3_50	230	4473	1214-8_bc1_1_bc2_68_bc3_82	2	8
	1214-7_bc1_10_bc2_25_bc3_60	1	1	1214-8_bc1_1_bc2_69_bc3_65	11	11
	1214-7_bc1_10_bc2_25_bc3_77	1	1	1214-8_bc1_1_bc2_69_bc3_69	22	4122
	1214-7_bc1_10_bc2_26_bc3_74	7	56	1214-8_bc1_1_bc2_7_bc3_8	15	3324
	1214-7_bc1_10_bc2_26_bc3_81	3	12	1214-8_bc1_1_bc2_71_bc3_87	1	1
	1214-7_bc1_10_bc2_27_bc3_53	3	3	1214-8_bc1_1_bc2_72_bc3_3	57	5454
	1214-7_bc1_10_bc2_27_bc3_6	1	1	1214-8_bc1_1_bc2_72_bc3_65	8	10
	1214-7_bc1_10_bc2_27_bc3_65	239	12336	1214-8_bc1_1_bc2_72_bc3_96	45	6326
	1214-7_bc1_10_bc2_28_bc3_32	2	4	1214-8_bc1_1_bc2_73_bc3_67	10	27
	1214-7_bc1_10_bc2_28_bc3_35	11	54	1214-8_bc1_1_bc2_73_bc3_70	8	9
	1214-7_bc1_10_bc2_29_bc3_46	6	6	1214-8_bc1_1_bc2_73_bc3_8	1	1
	1214-7_bc1_10_bc2_3_bc3_83	14	5385	1214-8_bc1_1_bc2_73_bc3_9	10	10
	1214-7_bc1_10_bc2_30_bc3_18	20	3843	1214-8_bc1_1_bc2_73_bc3_95	2	2
	1214-7_bc1_10_bc2_30_bc3_94	13	64	1214-8_bc1_1_bc2_74_bc3_43	6	7
	1214-7_bc1_10_bc2_31_bc3_10	5	22	1214-8_bc1_1_bc2_74_bc3_72	546	59664
	1214-7_bc1_10_bc2_31_bc3_40	324	23931	1214-8_bc1_1_bc2_74_bc3_76	7	7
	1214-7_bc1_10_bc2_31_bc3_5	5	5	1214-8_bc1_1_bc2_74_bc3_79	6	6
	1214-7_bc1_10_bc2_31_bc3_72	74	82	1214-8_bc1_1_bc2_74_bc3_8	7	8
	1214-7_bc1_10_bc2_32_bc3_62	6	12	1214-8_bc1_1_bc2_74_bc3_85	9	9
	1214-7_bc1_10_bc2_33_bc3_50	15	16	1214-8_bc1_1_bc2_74_bc3_96	15	35
	1214-7_bc1_10_bc2_33_bc3_67	20	24	1214-8_bc1_1_bc2_75_bc3_17	5	40
	1214-7_bc1_10_bc2_33_bc3_72	1	1	1214-8_bc1_1_bc2_75_bc3_28	4	5
	1214-7_bc1_10_bc2_34_bc3_17	13	13	1214-8_bc1_1_bc2_75_bc3_34	85	9003
	1214-7_bc1_10_bc2_34_bc3_23	7	39	1214-8_bc1_1_bc2_75_bc3_95	3	8
	1214-7_bc1_10_bc2_34_bc3_25	1	1	1214-8_bc1_1_bc2_75_bc3_96	4	5
	1214-7_bc1_10_bc2_34_bc3_26	225	257	1214-8_bc1_1_bc2_76_bc3_34	19	23
	1214-7_bc1_10_bc2_34_bc3_47	1	2	1214-8_bc1_1_bc2_77_bc3_11	1	1
	1214-7_bc1_10_bc2_34_bc3_54	17	82	1214-8_bc1_1_bc2_77_bc3_12	13	14
	1214-7_bc1_10_bc2_34_bc3_80	2	2	1214-8_bc1_1_bc2_77_bc3_16	2	4
	1214-7_bc1_10_bc2_35_bc3_40	3	5	1214-8_bc1_1_bc2_77_bc3_2	3	4
	1214-7_bc1_10_bc2_35_bc3_70	309	17259	1214-8_bc1_1_bc2_77_bc3_24	1	1
	1214-7_bc1_10_bc2_35_bc3_72	4	4	1214-8_bc1_1_bc2_77_bc3_25	2	2
	1214-7_bc1_10_bc2_35_bc3_82	3	4	1214-8_bc1_1_bc2_77_bc3_31	5	5
	1214-7_bc1_10_bc2_4_bc3_40	16	21	1214-8_bc1_1_bc2_77_bc3_41	4	5
	1214-7_bc1_10_bc2_41_bc3_57	89	99	1214-8_bc1_1_bc2_77_bc3_45	3	3
	1214-7_bc1_10_bc2_42_bc3_47	39	48	1214-8_bc1_1_bc2_77_bc3_47	6	7
	1214-7_bc1_10_bc2_44_bc3_1	2	2	1214-8_bc1_1_bc2_77_bc3_58	3	4
	1214-7_bc1_10_bc2_44_bc3_16	4	4	1214-8_bc1_1_bc2_77_bc3_66	2	2
	1214-7_bc1_10_bc2_44_bc3_18	29	35	1214-8_bc1_1_bc2_77_bc3_76	89	96
	1214-7_bc1_10_bc2_44_bc3_19	845	48823	1214-8_bc1_1_bc2_77_bc3_82	414	28652
	1214-7_bc1_10_bc2_44_bc3_20	3	4	1214-8_bc1_1_bc2_77_bc3_85	3	3
	1214-7_bc1_10_bc2_44_bc3_29	4	5	1214-8_bc1_1_bc2_77_bc3_89	3	3
	1214-7_bc1_10_bc2_44_bc3_31	8	9	1214-8_bc1_1_bc2_77_bc3_94	6	8
	1214-7_bc1_10_bc2_44_bc3_32	5	7	1214-8_bc1_1_bc2_77_bc3_95	5	7
	1214-7_bc1_10_bc2_44_bc3_43	3	3	1214-8_bc1_1_bc2_77_bc3_96	2	3
	1214-7_bc1_10_bc2_44_bc3_53	1	3	1214-8_bc1_1_bc2_79_bc3_29	13	15
	1214-7_bc1_10_bc2_44_bc3_54	4	5	1214-8_bc1_1_bc2_8_bc3_66	6	8
	1214-7_bc1_10_bc2_44_bc3_57	2	2	1214-8_bc1_1_bc2_80_bc3_24	67	8414
	1214-7_bc1_10_bc2_44_bc3_67	3	3	1214-8_bc1_1_bc2_82_bc3_4	4	5
	1214-7_bc1_10_bc2_45_bc3_72	23	25	1214-8_bc1_1_bc2_82_bc3_40	4	7
	1214-7_bc1_10_bc2_47_bc3_92	23	29	1214-8_bc1_1_bc2_82_bc3_5	26	30
	1214-7_bc1_10_bc2_49_bc3_29	4	5	1214-8_bc1_1_bc2_82_bc3_57	63	3087
	1214-7_bc1_10_bc2_49_bc3_64	2	8	1214-8_bc1_1_bc2_82_bc3_68	5	5
	1214-7_bc1_10_bc2_49_bc3_71	2	5	1214-8_bc1_1_bc2_83_bc3_1	2	2
	1214-7_bc1_10_bc2_53_bc3_19	2	4	1214-8_bc1_1_bc2_83_bc3_32	82	88
	1214-7_bc1_10_bc2_53_bc3_28	11	19	1214-8_bc1_1_bc2_84_bc3_69	3	8
	1214-7_bc1_10_bc2_57_bc3_17	17	18	1214-8_bc1_1_bc2_85_bc3_1	3	3
	1214-7_bc1_10_bc2_57_bc3_46	5	6	1214-8_bc1_1_bc2_85_bc3_34	2	3
	1214-7_bc1_10_bc2_57_bc3_71	4	5	1214-8_bc1_1_bc2_85_bc3_39	32	36
	1214-7_bc1_10_bc2_58_bc3_95	11	15	1214-8_bc1_1_bc2_85_bc3_40	82	9362
	1214-7_bc1_10_bc2_59_bc3_46	8	8	1214-8_bc1_1_bc2_85_bc3_76	5	7
	1214-7_bc1_10_bc2_60_bc3_35	1	1	1214-8_bc1_1_bc2_85_bc3_78	2	3
	1214-7_bc1_10_bc2_60_bc3_58	1	3	1214-8_bc1_1_bc2_86_bc3_77	34	39
	1214-7_bc1_10_bc2_60_bc3_62	144	197	1214-8_bc1_1_bc2_88_bc3_11	1	1
	1214-7_bc1_10_bc2_63_bc3_30	2	5	1214-8_bc1_1_bc2_88_bc3_13	38	44
	1214-7_bc1_10_bc2_63_bc3_71	122	141	1214-8_bc1_1_bc2_88_bc3_25	2	2
	1214-7_bc1_10_bc2_63_bc3_86	9	41	1214-8_bc1_1_bc2_88_bc3_3	4	4
	1214-7_bc1_10_bc2_63_bc3_96	15	17	1214-8_bc1_1_bc2_88_bc3_75	10	11
	1214-7_bc1_10_bc2_64_bc3_53	17	17	1214-8_bc1_1_bc2_88_bc3_8	99	109
	1214-7_bc1_10_bc2_65_bc3_16	15	16	1214-8_bc1_1_bc2_88_bc3_9	2	2
	1214-7_bc1_10_bc2_65_bc3_46	16	24	1214-8_bc1_1_bc2_89_bc3_73	71	76
	1214-7_bc1_10_bc2_65_bc3_50	10	14	1214-8_bc1_1_bc2_90_bc3_16	4	4
	1214-7_bc1_10_bc2_66_bc3_44	7	53	1214-8_bc1_1_bc2_90_bc3_53	3	3
	1214-7_bc1_10_bc2_66_bc3_52	11	57	1214-8_bc1_1_bc2_91_bc3_34	16	20
	1214-7_bc1_10_bc2_66_bc3_76	3	16	1214-8_bc1_1_bc2_91_bc3_78	2	8
	1214-7_bc1_10_bc2_66_bc3_9	5	27	1214-8_bc1_1_bc2_92_bc3_55	10	11
	1214-7_bc1_10_bc2_67_bc3_17	16	1589	1214-8_bc1_1_bc2_93_bc3_91	3	10
	1214-7_bc1_10_bc2_67_bc3_51	5	8	1214-8_bc1_1_bc2_93_bc3_95	4	5
	1214-7_bc1_10_bc2_67_bc3_65	157	172	1214-8_bc1_1_bc2_94_bc3_33	14	3111
	1214-7_bc1_10_bc2_67_bc3_66	2	17	1214-8_bc1_1_bc2_94_bc3_65	41	52
	1214-7_bc1_10_bc2_69_bc3_28	9	15	1214-8_bc1_1_bc2_94_bc3_66	5	5
	1214-7_bc1_10_bc2_69_bc3_84	3	4	1214-8_bc1_1_bc2_94_bc3_75	26	38
	1214-7_bc1_10_bc2_70_bc3_1	26	34	1214-8_bc1_1_bc2_94_bc3_85	46	7361
	1214-7_bc1_10_bc2_71_bc3_1	5	7	1214-8_bc1_1_bc2_95_bc3_3	19	6732
	1214-7_bc1_10_bc2_71_bc3_14	7	9	1214-8_bc1_1_bc2_95_bc3_5	21	22
	1214-7_bc1_10_bc2_71_bc3_16	9	9	1214-8_bc1_1_bc2_95_bc3_54	4	4
	1214-7_bc1_10_bc2_71_bc3_19	8	11	1214-8_bc1_1_bc2_95_bc3_78	6	6
	1214-7_bc1_10_bc2_71_bc3_26	2	3	1214-8_bc1_1_bc2_96_bc3_57	342	5837
	1214-7_bc1_10_bc2_71_bc3_28	4	4	1214-8_bc1_10_bc2_1_bc3_64	20	83
	1214-7_bc1_10_bc2_71_bc3_32	7	7	1214-8_bc1_10_bc2_10_bc3_38	17	20
	1214-7_bc1_10_bc2_71_bc3_33	10	12	1214-8_bc1_10_bc2_10_bc3_84	7	8
	1214-7_bc1_10_bc2_71_bc3_35	4	4	1214-8_bc1_10_bc2_11_bc3_1	10	20
	1214-7_bc1_10_bc2_71_bc3_45	31	36	1214-8_bc1_10_bc2_13_bc3_16	7	7
	1214-7_bc1_10_bc2_71_bc3_46	1406	103482	1214-8_bc1_10_bc2_13_bc3_61	4	4
	1214-7_bc1_10_bc2_71_bc3_52	2	3	1214-8_bc1_10_bc2_14_bc3_15	3	11
	1214-7_bc1_10_bc2_71_bc3_67	3	3	1214-8_bc1_10_bc2_14_bc3_72	38	42
	1214-7_bc1_10_bc2_71_bc3_84	3	3	1214-8_bc1_10_bc2_15_bc3_18	18	180
	1214-7_bc1_10_bc2_71_bc3_85	4	4	1214-8_bc1_10_bc2_15_bc3_86	11	13
	1214-7_bc1_10_bc2_71_bc3_95	3	3	1214-8_bc1_10_bc2_16_bc3_22	2	3
	1214-7_bc1_10_bc2_72_bc3_58	18	21	1214-8_bc1_10_bc2_16_bc3_25	5	5
	1214-7_bc1_10_bc2_73_bc3_80	2	6	1214-8_bc1_10_bc2_16_bc3_37	406	35628
	1214-7_bc1_10_bc2_76_bc3_41	1	31	1214-8_bc1_10_bc2_16_bc3_44	1	1
	1214-7_bc1_10_bc2_79_bc3_96	64	75	1214-8_bc1_10_bc2_16_bc3_45	4	4
	1214-7_bc1_10_bc2_8_bc3_22	26	32	1214-8_bc1_10_bc2_16_bc3_55	3	3
	1214-7_bc1_10_bc2_8_bc3_84	1	1	1214-8_bc1_10_bc2_16_bc3_82	9	2059
	1214-7_bc1_10_bc2_80_bc3_16	19	23	1214-8_bc1_10_bc2_16_bc3_88	1	1
	1214-7_bc1_10_bc2_81_bc3_76	2	13	1214-8_bc1_10_bc2_16_bc3_93	363	3148
	1214-7_bc1_10_bc2_81_bc3_93	3	18	1214-8_bc1_10_bc2_16_bc3_96	1	1
	1214-7_bc1_10_bc2_82_bc3_63	4	4	1214-8_bc1_10_bc2_17_bc3_65	5	8
	1214-7_bc1_10_bc2_82_bc3_75	163	183	1214-8_bc1_10_bc2_18_bc3_1	2	3
	1214-7_bc1_10_bc2_83_bc3_17	3	17	1214-8_bc1_10_bc2_18_bc3_12	3	3
	1214-7_bc1_10_bc2_86_bc3_42	1	1	1214-8_bc1_10_bc2_18_bc3_16	60	4423
	1214-7_bc1_10_bc2_87_bc3_74	5	19	1214-8_bc1_10_bc2_18_bc3_18	4	4
	1214-7_bc1_10_bc2_88_bc3_46	190	231	1214-8_bc1_10_bc2_18_bc3_25	916	38541
	1214-7_bc1_10_bc2_88_bc3_84	2	2	1214-8_bc1_10_bc2_18_bc3_26	3	3
	1214-7_bc1_10_bc2_90_bc3_73	7	25	1214-8_bc1_10_bc2_18_bc3_40	3	3
	1214-7_bc1_10_bc2_91_bc3_63	3	8	1214-8_bc1_10_bc2_18_bc3_52	3	3
	1214-7_bc1_10_bc2_91_bc3_78	31	40	1214-8_bc1_10_bc2_18_bc3_73	2	2
	1214-7_bc1_10_bc2_91_bc3_9	115	147	1214-8_bc1_10_bc2_18_bc3_76	2	2
	1214-7_bc1_10_bc2_93_bc3_12	17	20	1214-8_bc1_10_bc2_18_bc3_77	1	1
	1214-7_bc1_10_bc2_93_bc3_52	2	2	1214-8_bc1_10_bc2_18_bc3_85	1	2
	1214-7_bc1_10_bc2_94_bc3_85	135	5153	1214-8_bc1_10_bc2_18_bc3_96	22	115
	1214-7_bc1_10_bc2_95_bc3_14	2	7	1214-8_bc1_10_bc2_19_bc3_84	3	3
	1214-7_bc1_10_bc2_95_bc3_28	6	9	1214-8_bc1_10_bc2_19_bc3_93	4	15
	1214-7_bc1_10_bc2_96_bc3_74	4	4	1214-8_bc1_10_bc2_2_bc3_24	14	18
	1214-7_bc1_11_bc2_1_bc3_77	4	7	1214-8_bc1_10_bc2_2_bc3_36	41	4321
	1214-7_bc1_11_bc2_1_bc3_85	2	5	1214-8_bc1_10_bc2_2_bc3_60	3	7
	1214-7_bc1_11_bc2_10_bc3_17	20	22	1214-8_bc1_10_bc2_20_bc3_33	8	2083
	1214-7_bc1_11_bc2_10_bc3_34	6	7	1214-8_bc1_10_bc2_20_bc3_58	18	38
	1214-7_bc1_11_bc2_10_bc3_45	25	30	1214-8_bc1_10_bc2_21_bc3_13	4	4
	1214-7_bc1_11_bc2_11_bc3_2	39	44	1214-8_bc1_10_bc2_21_bc3_19	3	3
	1214-7_bc1_11_bc2_11_bc3_59	5	24	1214-8_bc1_10_bc2_21_bc3_2	5	5
	1214-7_bc1_11_bc2_12_bc3_74	1	1	1214-8_bc1_10_bc2_21_bc3_27	4	5
	1214-7_bc1_11_bc2_14_bc3_85	7	49	1214-8_bc1_10_bc2_21_bc3_29	105	5749
	1214-7_bc1_11_bc2_15_bc3_21	12	68	1214-8_bc1_10_bc2_21_bc3_30	365	16961
	1214-7_bc1_11_bc2_15_bc3_96	1	1	1214-8_bc1_10_bc2_21_bc3_35	4	4
	1214-7_bc1_11_bc2_16_bc3_14	2	2	1214-8_bc1_10_bc2_21_bc3_45	3	4
	1214-7_bc1_11_bc2_16_bc3_18	5	5	1214-8_bc1_10_bc2_21_bc3_6	3	6
	1214-7_bc1_11_bc2_16_bc3_20	3	3	1214-8_bc1_10_bc2_21_bc3_62	93	6141
	1214-7_bc1_11_bc2_16_bc3_26	2	3	1214-8_bc1_10_bc2_21_bc3_77	3	3
	1214-7_bc1_11_bc2_16_bc3_28	5	6	1214-8_bc1_10_bc2_21_bc3_83	8	11
	1214-7_bc1_11_bc2_16_bc3_31	11	16	1214-8_bc1_10_bc2_21_bc3_94	4	4
	1214-7_bc1_11_bc2_16_bc3_35	1	1	1214-8_bc1_10_bc2_22_bc3_23	6	8
	1214-7_bc1_11_bc2_16_bc3_38	2	2	1214-8_bc1_10_bc2_22_bc3_54	8	24
	1214-7_bc1_11_bc2_16_bc3_40	1	1	1214-8_bc1_10_bc2_22_bc3_91	8	8
	1214-7_bc1_11_bc2_16_bc3_50	1	1	1214-8_bc1_10_bc2_23_bc3_33	2	14
	1214-7_bc1_11_bc2_16_bc3_57	1	1	1214-8_bc1_10_bc2_23_bc3_67	5	13
	1214-7_bc1_11_bc2_16_bc3_6	7	9	1214-8_bc1_10_bc2_24_bc3_10	12	12
	1214-7_bc1_11_bc2_16_bc3_60	1	1	1214-8_bc1_10_bc2_24_bc3_11	103	13775
	1214-7_bc1_11_bc2_16_bc3_63	1	1	1214-8_bc1_10_bc2_24_bc3_36	4	4
	1214-7_bc1_11_bc2_16_bc3_65	1	1	1214-8_bc1_10_bc2_24_bc3_47	13	13
	1214-7_bc1_11_bc2_16_bc3_66	3	3	1214-8_bc1_10_bc2_24_bc3_75	4	5
	1214-7_bc1_11_bc2_16_bc3_67	5	5	1214-8_bc1_10_bc2_24_bc3_77	124	7074
	1214-7_bc1_11_bc2_16_bc3_73	3	3	1214-8_bc1_10_bc2_25_bc3_11	14	15
	1214-7_bc1_11_bc2_16_bc3_75	2	2	1214-8_bc1_10_bc2_25_bc3_26	1	3
	1214-7_bc1_11_bc2_16_bc3_76	1	3	1214-8_bc1_10_bc2_25_bc3_33	73	7524
	1214-7_bc1_11_bc2_16_bc3_77	1	1	1214-8_bc1_10_bc2_25_bc3_50	1	5
	1214-7_bc1_11_bc2_16_bc3_78	1	1	1214-8_bc1_10_bc2_25_bc3_80	12	15
	1214-7_bc1_11_bc2_16_bc3_79	1	1	1214-8_bc1_10_bc2_26_bc3_11	3	6
	1214-7_bc1_11_bc2_16_bc3_80	1	1	1214-8_bc1_10_bc2_26_bc3_3	5	5
	1214-7_bc1_11_bc2_16_bc3_84	2	3	1214-8_bc1_10_bc2_26_bc3_44	3	4
	1214-7_bc1_11_bc2_16_bc3_85	1200	47866	1214-8_bc1_10_bc2_26_bc3_74	361	36950
	1214-7_bc1_11_bc2_16_bc3_92	1	2	1214-8_bc1_10_bc2_26_bc3_76	2	3
	1214-7_bc1_11_bc2_16_bc3_95	1	2	1214-8_bc1_10_bc2_26_bc3_80	21	23
	1214-7_bc1_11_bc2_17_bc3_36	4	33	1214-8_bc1_10_bc2_26_bc3_81	78	4073
	1214-7_bc1_11_bc2_18_bc3_62	1	1	1214-8_bc1_10_bc2_26_bc3_92	8	9
	1214-7_bc1_11_bc2_18_bc3_84	29	141	1214-8_bc1_10_bc2_26_bc3_93	5	5
	1214-7_bc1_11_bc2_19_bc3_58	2	5	1214-8_bc1_10_bc2_27_bc3_49	6	11
	1214-7_bc1_11_bc2_20_bc3_25	344	24965	1214-8_bc1_10_bc2_27_bc3_65	2	6
	1214-7_bc1_11_bc2_21_bc3_11	8	33	1214-8_bc1_10_bc2_28_bc3_35	600	32874
	1214-7_bc1_11_bc2_21_bc3_80	18	19	1214-8_bc1_10_bc2_28_bc3_42	2	2
	1214-7_bc1_11_bc2_22_bc3_25	19	20	1214-8_bc1_10_bc2_29_bc3_72	3	11
	1214-7_bc1_11_bc2_24_bc3_20	12	72	1214-8_bc1_10_bc2_30_bc3_32	2	2
	1214-7_bc1_11_bc2_25_bc3_10	9	12	1214-8_bc1_10_bc2_30_bc3_42	3	3
	1214-7_bc1_11_bc2_25_bc3_3	9	35	1214-8_bc1_10_bc2_30_bc3_75	4	6
	1214-7_bc1_11_bc2_25_bc3_93	7	52	1214-8_bc1_10_bc2_30_bc3_85	2	3
	1214-7_bc1_11_bc2_26_bc3_39	63	5815	1214-8_bc1_10_bc2_30_bc3_87	5	10
	1214-7_bc1_11_bc2_26_bc3_57	7	7	1214-8_bc1_10_bc2_30_bc3_94	585	44885
	1214-7_bc1_11_bc2_28_bc3_1	6	7	1214-8_bc1_10_bc2_31_bc3_10	121	9334
	1214-7_bc1_11_bc2_28_bc3_19	3	3	1214-8_bc1_10_bc2_31_bc3_40	6	14
	1214-7_bc1_11_bc2_28_bc3_32	3	3	1214-8_bc1_10_bc2_32_bc3_23	10	10
	1214-7_bc1_11_bc2_28_bc3_8	505	24603	1214-8_bc1_10_bc2_32_bc3_36	30	37
	1214-7_bc1_11_bc2_28_bc3_94	16	17	1214-8_bc1_10_bc2_32_bc3_51	12	14
	1214-7_bc1_11_bc2_29_bc3_50	16	16	1214-8_bc1_10_bc2_33_bc3_13	4	4
	1214-7_bc1_11_bc2_3_bc3_50	7	41	1214-8_bc1_10_bc2_33_bc3_50	2	8
	1214-7_bc1_11_bc2_30_bc3_43	2	16	1214-8_bc1_10_bc2_33_bc3_72	65	503
	1214-7_bc1_11_bc2_30_bc3_62	34	351	1214-8_bc1_10_bc2_33_bc3_79	27	40
	1214-7_bc1_11_bc2_31_bc3_4	1	1	1214-8_bc1_10_bc2_34_bc3_1	5	6
	1214-7_bc1_11_bc2_32_bc3_16	1	2	1214-8_bc1_10_bc2_34_bc3_2	3	3
	1214-7_bc1_11_bc2_32_bc3_19	1	2	1214-8_bc1_10_bc2_34_bc3_23	349	27338
	1214-7_bc1_11_bc2_32_bc3_5	413	13491	1214-8_bc1_10_bc2_34_bc3_26	5	7
	1214-7_bc1_11_bc2_32_bc3_65	1	1	1214-8_bc1_10_bc2_34_bc3_27	4	4
	1214-7_bc1_11_bc2_33_bc3_41	1	1	1214-8_bc1_10_bc2_34_bc3_30	6	6
	1214-7_bc1_11_bc2_33_bc3_67	32	37	1214-8_bc1_10_bc2_34_bc3_40	45	3284
	1214-7_bc1_11_bc2_34_bc3_33	1	9	1214-8_bc1_10_bc2_34_bc3_44	4	4
	1214-7_bc1_11_bc2_35_bc3_69	77	86	1214-8_bc1_10_bc2_34_bc3_5	7	9
	1214-7_bc1_11_bc2_35_bc3_82	15	21	1214-8_bc1_10_bc2_34_bc3_54	754	57289
	1214-7_bc1_11_bc2_36_bc3_74	1	11	1214-8_bc1_10_bc2_34_bc3_55	7	8
	1214-7_bc1_11_bc2_39_bc3_12	1	1	1214-8_bc1_10_bc2_34_bc3_58	3	3
	1214-7_bc1_11_bc2_39_bc3_28	9	11	1214-8_bc1_10_bc2_34_bc3_61	4	4
	1214-7_bc1_11_bc2_42_bc3_25	29	31	1214-8_bc1_10_bc2_34_bc3_73	2	3
	1214-7_bc1_11_bc2_43_bc3_16	25	30	1214-8_bc1_10_bc2_34_bc3_78	3	4
	1214-7_bc1_11_bc2_44_bc3_5	1	1	1214-8_bc1_10_bc2_34_bc3_80	9	11
	1214-7_bc1_11_bc2_44_bc3_54	4	32	1214-8_bc1_10_bc2_34_bc3_84	3	6
	1214-7_bc1_11_bc2_44_bc3_65	16	85	1214-8_bc1_10_bc2_34_bc3_94	7	9
	1214-7_bc1_11_bc2_47_bc3_14	2	9	1214-8_bc1_10_bc2_35_bc3_26	10	11
	1214-7_bc1_11_bc2_48_bc3_81	21	22	1214-8_bc1_10_bc2_35_bc3_27	1	1
	1214-7_bc1_11_bc2_49_bc3_92	17	96	1214-8_bc1_10_bc2_35_bc3_70	3	7
	1214-7_bc1_11_bc2_50_bc3_13	860	59813	1214-8_bc1_10_bc2_36_bc3_36	33	4665
	1214-7_bc1_11_bc2_50_bc3_26	2	3	1214-8_bc1_10_bc2_39_bc3_85	5	12
	1214-7_bc1_11_bc2_50_bc3_31	17	22	1214-8_bc1_10_bc2_39_bc3_89	4	7
	1214-7_bc1_11_bc2_50_bc3_42	6	31	1214-8_bc1_10_bc2_40_bc3_72	22	23
	1214-7_bc1_11_bc2_50_bc3_62	14	41	1214-8_bc1_10_bc2_40_bc3_90	7	11
	1214-7_bc1_11_bc2_50_bc3_67	1	1	1214-8_bc1_10_bc2_41_bc3_58	1	1
	1214-7_bc1_11_bc2_56_bc3_57	34	1659	1214-8_bc1_10_bc2_43_bc3_84	58	6448
	1214-7_bc1_11_bc2_56_bc3_68	9	61	1214-8_bc1_10_bc2_44_bc3_19	11	27
	1214-7_bc1_11_bc2_57_bc3_11	316	7013	1214-8_bc1_10_bc2_44_bc3_25	43	56
	1214-7_bc1_11_bc2_57_bc3_16	1	1	1214-8_bc1_10_bc2_44_bc3_35	1	1
	1214-7_bc1_11_bc2_58_bc3_25	19	20	1214-8_bc1_10_bc2_44_bc3_4	3	3
	1214-7_bc1_11_bc2_60_bc3_44	23	28	1214-8_bc1_10_bc2_44_bc3_75	5	8
	1214-7_bc1_11_bc2_62_bc3_47	1	4	1214-8_bc1_10_bc2_45_bc3_58	9	11
	1214-7_bc1_11_bc2_63_bc3_41	14	17	1214-8_bc1_10_bc2_45_bc3_65	3	3
	1214-7_bc1_11_bc2_63_bc3_68	32	38	1214-8_bc1_10_bc2_45_bc3_81	8	9
	1214-7_bc1_11_bc2_63_bc3_79	188	9865	1214-8_bc1_10_bc2_46_bc3_33	12	4354
	1214-7_bc1_11_bc2_64_bc3_88	2	11	1214-8_bc1_10_bc2_47_bc3_25	3	4
	1214-7_bc1_11_bc2_65_bc3_16	12	14	1214-8_bc1_10_bc2_47_bc3_40	2	2
	1214-7_bc1_11_bc2_65_bc3_55	22	49	1214-8_bc1_10_bc2_47_bc3_74	12	13
	1214-7_bc1_11_bc2_66_bc3_3	475	35821	1214-8_bc1_10_bc2_49_bc3_35	3	11
	1214-7_bc1_11_bc2_66_bc3_48	6	6	1214-8_bc1_10_bc2_49_bc3_51	1	1
	1214-7_bc1_11_bc2_66_bc3_52	9	28	1214-8_bc1_10_bc2_49_bc3_53	5	14
	1214-7_bc1_11_bc2_66_bc3_73	24	34	1214-8_bc1_10_bc2_49_bc3_64	117	4618
	1214-7_bc1_11_bc2_67_bc3_25	367	20572	1214-8_bc1_10_bc2_49_bc3_66	46	50
	1214-7_bc1_11_bc2_67_bc3_38	2	5	1214-8_bc1_10_bc2_51_bc3_16	32	3265
	1214-7_bc1_11_bc2_67_bc3_4	2	17	1214-8_bc1_10_bc2_51_bc3_65	9	11
	1214-7_bc1_11_bc2_69_bc3_84	14	15	1214-8_bc1_10_bc2_53_bc3_19	124	2046
	1214-7_bc1_11_bc2_7_bc3_28	1	4	1214-8_bc1_10_bc2_53_bc3_42	7	7
	1214-7_bc1_11_bc2_7_bc3_77	108	4258	1214-8_bc1_10_bc2_54_bc3_78	2	5
	1214-7_bc1_11_bc2_70_bc3_75	7	37	1214-8_bc1_10_bc2_56_bc3_77	36	7111
	1214-7_bc1_11_bc2_71_bc3_18	1	2	1214-8_bc1_10_bc2_57_bc3_21	13	14
	1214-7_bc1_11_bc2_73_bc3_29	1	6	1214-8_bc1_10_bc2_58_bc3_29	27	34
	1214-7_bc1_11_bc2_73_bc3_5	20	22	1214-8_bc1_10_bc2_60_bc3_26	13	13
	1214-7_bc1_11_bc2_74_bc3_22	17	95	1214-8_bc1_10_bc2_60_bc3_35	102	124
	1214-7_bc1_11_bc2_74_bc3_34	3	10	1214-8_bc1_10_bc2_60_bc3_58	67	2540
	1214-7_bc1_11_bc2_74_bc3_41	5	7	1214-8_bc1_10_bc2_60_bc3_80	1	1
	1214-7_bc1_11_bc2_74_bc3_5	13	17	1214-8_bc1_10_bc2_60_bc3_85	3	3
	1214-7_bc1_11_bc2_74_bc3_53	322	7918	1214-8_bc1_10_bc2_61_bc3_12	44	2270
	1214-7_bc1_11_bc2_74_bc3_92	6	15	1214-8_bc1_10_bc2_61_bc3_49	11	11
	1214-7_bc1_11_bc2_75_bc3_52	10	85	1214-8_bc1_10_bc2_63_bc3_30	85	4061
	1214-7_bc1_11_bc2_75_bc3_68	22	25	1214-8_bc1_10_bc2_63_bc3_71	1	1
	1214-7_bc1_11_bc2_77_bc3_20	14	17	1214-8_bc1_10_bc2_63_bc3_86	99	12021
	1214-7_bc1_11_bc2_77_bc3_6	1	2	1214-8_bc1_10_bc2_64_bc3_39	19	20
	1214-7_bc1_11_bc2_77_bc3_80	34	41	1214-8_bc1_10_bc2_65_bc3_50	4	4
	1214-7_bc1_11_bc2_79_bc3_2	454	22198	1214-8_bc1_10_bc2_65_bc3_67	5	5
	1214-7_bc1_11_bc2_79_bc3_95	1	1	1214-8_bc1_10_bc2_66_bc3_11	3	3
	1214-7_bc1_11_bc2_8_bc3_77	4	4	1214-8_bc1_10_bc2_66_bc3_12	5	5
	1214-7_bc1_11_bc2_8_bc3_85	3	3	1214-8_bc1_10_bc2_66_bc3_16	6	6
	1214-7_bc1_11_bc2_80_bc3_15	2	3	1214-8_bc1_10_bc2_66_bc3_17	1	1
	1214-7_bc1_11_bc2_80_bc3_16	16	19	1214-8_bc1_10_bc2_66_bc3_23	4	5
	1214-7_bc1_11_bc2_80_bc3_86	8	14	1214-8_bc1_10_bc2_66_bc3_25	3	3
	1214-7_bc1_11_bc2_81_bc3_70	6	50	1214-8_bc1_10_bc2_66_bc3_28	5	6
	1214-7_bc1_11_bc2_81_bc3_72	218	264	1214-8_bc1_10_bc2_66_bc3_3	5	6
	1214-7_bc1_11_bc2_81_bc3_77	72	83	1214-8_bc1_10_bc2_66_bc3_30	4	5
	1214-7_bc1_11_bc2_82_bc3_14	23	28	1214-8_bc1_10_bc2_66_bc3_4	4	4
	1214-7_bc1_11_bc2_82_bc3_23	334	4616	1214-8_bc1_10_bc2_66_bc3_44	397	29421
	1214-7_bc1_11_bc2_82_bc3_63	2	2	1214-8_bc1_10_bc2_66_bc3_45	2	2
	1214-7_bc1_11_bc2_82_bc3_67	2	3	1214-8_bc1_10_bc2_66_bc3_46	2	2
	1214-7_bc1_11_bc2_83_bc3_11	15	18	1214-8_bc1_10_bc2_66_bc3_48	1	1
	1214-7_bc1_11_bc2_83_bc3_85	5	5	1214-8_bc1_10_bc2_66_bc3_5	6	9
	1214-7_bc1_11_bc2_83_bc3_88	6	30	1214-8_bc1_10_bc2_66_bc3_51	6	7
	1214-7_bc1_11_bc2_84_bc3_16	1	8	1214-8_bc1_10_bc2_66_bc3_52	673	34858
	1214-7_bc1_11_bc2_84_bc3_72	1	3	1214-8_bc1_10_bc2_66_bc3_60	1	1
	1214-7_bc1_11_bc2_84_bc3_95	6	6	1214-8_bc1_10_bc2_66_bc3_61	2	3
	1214-7_bc1_11_bc2_85_bc3_84	5	32	1214-8_bc1_10_bc2_66_bc3_67	2	2
	1214-7_bc1_11_bc2_86_bc3_20	3	4	1214-8_bc1_10_bc2_66_bc3_73	6	7
	1214-7_bc1_11_bc2_86_bc3_43	172	11403	1214-8_bc1_10_bc2_66_bc3_75	2	2
	1214-7_bc1_11_bc2_87_bc3_30	12	12	1214-8_bc1_10_bc2_66_bc3_76	75	2522
	1214-7_bc1_11_bc2_88_bc3_47	7	37	1214-8_bc1_10_bc2_66_bc3_78	1	1
	1214-7_bc1_11_bc2_89_bc3_79	2	15	1214-8_bc1_10_bc2_66_bc3_79	1	1
	1214-7_bc1_11_bc2_90_bc3_77	3	10	1214-8_bc1_10_bc2_66_bc3_83	3	3
	1214-7_bc1_11_bc2_93_bc3_2	43	4332	1214-8_bc1_10_bc2_66_bc3_84	4	5
	1214-7_bc1_11_bc2_93_bc3_69	15	16	1214-8_bc1_10_bc2_66_bc3_86	4	4
	1214-7_bc1_11_bc2_96_bc3_1	5	18	1214-8_bc1_10_bc2_66_bc3_9	96	7409
	1214-7_bc1_11_bc2_96_bc3_45	129	145	1214-8_bc1_10_bc2_66_bc3_95	3	3
	1214-7_bc1_12_bc2_1_bc3_47	1	6	1214-8_bc1_10_bc2_67_bc3_42	4	4
	1214-7_bc1_12_bc2_10_bc3_44	4	15	1214-8_bc1_10_bc2_67_bc3_65	1	2
	1214-7_bc1_12_bc2_10_bc3_5	2	2	1214-8_bc1_10_bc2_67_bc3_66	75	5342
	1214-7_bc1_12_bc2_10_bc3_64	1	1	1214-8_bc1_10_bc2_67_bc3_85	1	1
	1214-7_bc1_12_bc2_11_bc3_51	15	15	1214-8_bc1_10_bc2_67_bc3_89	4	23
	1214-7_bc1_12_bc2_12_bc3_30	23	27	1214-8_bc1_10_bc2_67_bc3_92	6	8
	1214-7_bc1_12_bc2_13_bc3_32	5	19	1214-8_bc1_10_bc2_68_bc3_70	16	17
	1214-7_bc1_12_bc2_15_bc3_16	1	1	1214-8_bc1_10_bc2_71_bc3_46	33	77
	1214-7_bc1_12_bc2_15_bc3_20	1	1	1214-8_bc1_10_bc2_71_bc3_74	5	10
	1214-7_bc1_12_bc2_15_bc3_55	2	5	1214-8_bc1_10_bc2_72_bc3_36	16	17
	1214-7_bc1_12_bc2_15_bc3_58	1	1	1214-8_bc1_10_bc2_73_bc3_62	1	1
	1214-7_bc1_12_bc2_15_bc3_64	1	1	1214-8_bc1_10_bc2_73_bc3_80	97	5423
	1214-7_bc1_12_bc2_15_bc3_8	24	6395	1214-8_bc1_10_bc2_74_bc3_96	24	27
	1214-7_bc1_12_bc2_15_bc3_81	371	428	1214-8_bc1_10_bc2_75_bc3_55	5	5
	1214-7_bc1_12_bc2_15_bc3_85	1	1	1214-8_bc1_10_bc2_76_bc3_25	4	4
	1214-7_bc1_12_bc2_15_bc3_94	2	3	1214-8_bc1_10_bc2_76_bc3_65	29	31
	1214-7_bc1_12_bc2_15_bc3_96	3	7	1214-8_bc1_10_bc2_76_bc3_92	3	6
	1214-7_bc1_12_bc2_16_bc3_31	361	452	1214-8_bc1_10_bc2_77_bc3_12	4	11
	1214-7_bc1_12_bc2_16_bc3_85	6	7	1214-8_bc1_10_bc2_79_bc3_25	18	2943
	1214-7_bc1_12_bc2_17_bc3_19	140	403	1214-8_bc1_10_bc2_79_bc3_56	27	38
	1214-7_bc1_12_bc2_17_bc3_28	4	24	1214-8_bc1_10_bc2_8_bc3_18	3	3
	1214-7_bc1_12_bc2_17_bc3_76	1	4	1214-8_bc1_10_bc2_8_bc3_37	5	6
	1214-7_bc1_12_bc2_17_bc3_86	13	1068	1214-8_bc1_10_bc2_8_bc3_79	2	3
	1214-7_bc1_12_bc2_18_bc3_73	6	7	1214-8_bc1_10_bc2_8_bc3_84	153	256
	1214-7_bc1_12_bc2_19_bc3_79	3	5	1214-8_bc1_10_bc2_8_bc3_95	11	19
	1214-7_bc1_12_bc2_20_bc3_47	1	6	1214-8_bc1_10_bc2_80_bc3_85	44	1345
	1214-7_bc1_12_bc2_23_bc3_57	5	6	1214-8_bc1_10_bc2_81_bc3_76	326	10433
	1214-7_bc1_12_bc2_25_bc3_95	181	12759	1214-8_bc1_10_bc2_81_bc3_93	93	6160
	1214-7_bc1_12_bc2_26_bc3_29	132	5770	1214-8_bc1_10_bc2_82_bc3_21	10	13
	1214-7_bc1_12_bc2_26_bc3_57	1	2	1214-8_bc1_10_bc2_82_bc3_46	4	11
	1214-7_bc1_12_bc2_26_bc3_59	15	67	1214-8_bc1_10_bc2_82_bc3_63	82	94
	1214-7_bc1_12_bc2_26_bc3_76	44	52	1214-8_bc1_10_bc2_83_bc3_17	71	7757
	1214-7_bc1_12_bc2_27_bc3_29	5	19	1214-8_bc1_10_bc2_84_bc3_33	12	19
	1214-7_bc1_12_bc2_27_bc3_94	22	24	1214-8_bc1_10_bc2_85_bc3_34	8	22
	1214-7_bc1_12_bc2_28_bc3_1	3	3	1214-8_bc1_10_bc2_85_bc3_45	5	5
	1214-7_bc1_12_bc2_28_bc3_32	11	14	1214-8_bc1_10_bc2_85_bc3_79	72	5927
	1214-7_bc1_12_bc2_28_bc3_37	5	28	1214-8_bc1_10_bc2_86_bc3_35	1	1
	1214-7_bc1_12_bc2_28_bc3_40	8	30	1214-8_bc1_10_bc2_86_bc3_39	56	2688
	1214-7_bc1_12_bc2_28_bc3_87	379	11982	1214-8_bc1_10_bc2_86_bc3_42	150	161
	1214-7_bc1_12_bc2_3_bc3_83	93	108	1214-8_bc1_10_bc2_87_bc3_19	3	4
	1214-7_bc1_12_bc2_3_bc3_91	22	23	1214-8_bc1_10_bc2_87_bc3_74	296	12652
	1214-7_bc1_12_bc2_3_bc3_94	18	18	1214-8_bc1_10_bc2_87_bc3_92	23	27
	1214-7_bc1_12_bc2_30_bc3_25	160	184	1214-8_bc1_10_bc2_88_bc3_77	35	38
	1214-7_bc1_12_bc2_31_bc3_43	1	4	1214-8_bc1_10_bc2_89_bc3_77	4	5
	1214-7_bc1_12_bc2_31_bc3_51	15	18	1214-8_bc1_10_bc2_90_bc3_73	106	4117
	1214-7_bc1_12_bc2_32_bc3_79	37	1226	1214-8_bc1_10_bc2_91_bc3_42	45	48
	1214-7_bc1_12_bc2_33_bc3_67	4	4	1214-8_bc1_10_bc2_91_bc3_44	32	34
	1214-7_bc1_12_bc2_33_bc3_80	20	23	1214-8_bc1_10_bc2_91_bc3_5	1	1
	1214-7_bc1_12_bc2_34_bc3_27	4	12	1214-8_bc1_10_bc2_91_bc3_63	71	2844
	1214-7_bc1_12_bc2_35_bc3_33	193	8181	1214-8_bc1_10_bc2_91_bc3_68	31	37
	1214-7_bc1_12_bc2_36_bc3_39	52	64	1214-8_bc1_10_bc2_92_bc3_44	36	40
	1214-7_bc1_12_bc2_39_bc3_28	7	11	1214-8_bc1_10_bc2_93_bc3_36	5	8
	1214-7_bc1_12_bc2_40_bc3_38	2	9	1214-8_bc1_10_bc2_93_bc3_52	41	44
	1214-7_bc1_12_bc2_43_bc3_2	1	1	1214-8_bc1_10_bc2_93_bc3_76	3	10
	1214-7_bc1_12_bc2_43_bc3_34	2	7	1214-8_bc1_10_bc2_94_bc3_8	3	3
	1214-7_bc1_12_bc2_44_bc3_70	3	29	1214-8_bc1_10_bc2_94_bc3_85	3	5
	1214-7_bc1_12_bc2_46_bc3_17	17	22	1214-8_bc1_10_bc2_95_bc3_21	84	116
	1214-7_bc1_12_bc2_46_bc3_88	1	2	1214-8_bc1_10_bc2_96_bc3_76	12	3251
	1214-7_bc1_12_bc2_46_bc3_95	1	4	1214-8_bc1_11_bc2_1_bc3_12	8	2785
	1214-7_bc1_12_bc2_46_bc3_96	23	29	1214-8_bc1_11_bc2_1_bc3_18	26	2988
	1214-7_bc1_12_bc2_47_bc3_66	2	2	1214-8_bc1_11_bc2_1_bc3_77	63	3956
	1214-7_bc1_12_bc2_48_bc3_16	1	11	1214-8_bc1_11_bc2_1_bc3_85	76	3824
	1214-7_bc1_12_bc2_48_bc3_64	538	619	1214-8_bc1_11_bc2_11_bc3_1	1	1
	1214-7_bc1_12_bc2_49_bc3_11	26	28	1214-8_bc1_11_bc2_11_bc3_43	2	3
	1214-7_bc1_12_bc2_50_bc3_13	32	4967	1214-8_bc1_11_bc2_11_bc3_59	475	19868
	1214-7_bc1_12_bc2_50_bc3_46	115	134	1214-8_bc1_11_bc2_11_bc3_95	2	2
	1214-7_bc1_12_bc2_50_bc3_83	24	30	1214-8_bc1_11_bc2_13_bc3_83	57	12618
	1214-7_bc1_12_bc2_50_bc3_85	2	2	1214-8_bc1_11_bc2_14_bc3_41	28	32
	1214-7_bc1_12_bc2_51_bc3_22	18	21	1214-8_bc1_11_bc2_14_bc3_72	9	9
	1214-7_bc1_12_bc2_52_bc3_60	2	8	1214-8_bc1_11_bc2_14_bc3_75	46	53
	1214-7_bc1_12_bc2_53_bc3_47	2	7	1214-8_bc1_11_bc2_14_bc3_85	380	29636
	1214-7_bc1_12_bc2_56_bc3_17	3	9	1214-8_bc1_11_bc2_15_bc3_1	2	2
	1214-7_bc1_12_bc2_6_bc3_43	236	531	1214-8_bc1_11_bc2_15_bc3_11	5	6
	1214-7_bc1_12_bc2_61_bc3_92	38	125	1214-8_bc1_11_bc2_15_bc3_18	3	5
	1214-7_bc1_12_bc2_61_bc3_93	4	18	1214-8_bc1_11_bc2_15_bc3_21	865	63512
	1214-7_bc1_12_bc2_62_bc3_82	40	2664	1214-8_bc1_11_bc2_15_bc3_32	5	6
	1214-7_bc1_12_bc2_63_bc3_4	1	3	1214-8_bc1_11_bc2_15_bc3_48	7	8
	1214-7_bc1_12_bc2_63_bc3_5	7	31	1214-8_bc1_11_bc2_15_bc3_6	9	9
	1214-7_bc1_12_bc2_63_bc3_54	28	35	1214-8_bc1_11_bc2_15_bc3_61	3	3
	1214-7_bc1_12_bc2_65_bc3_14	1	1	1214-8_bc1_11_bc2_15_bc3_65	3	3
	1214-7_bc1_12_bc2_65_bc3_16	17	20	1214-8_bc1_11_bc2_15_bc3_73	1	1
	1214-7_bc1_12_bc2_65_bc3_40	6	13	1214-8_bc1_11_bc2_15_bc3_74	4	4
	1214-7_bc1_12_bc2_65_bc3_45	25	30	1214-8_bc1_11_bc2_15_bc3_87	2	3
	1214-7_bc1_12_bc2_65_bc3_73	37	5529	1214-8_bc1_11_bc2_15_bc3_88	4	4
	1214-7_bc1_12_bc2_65_bc3_76	6	22	1214-8_bc1_11_bc2_15_bc3_96	3	4
	1214-7_bc1_12_bc2_66_bc3_12	2	2	1214-8_bc1_11_bc2_16_bc3_6	25	27
	1214-7_bc1_12_bc2_66_bc3_14	2	2	1214-8_bc1_11_bc2_16_bc3_73	77	87
	1214-7_bc1_12_bc2_66_bc3_16	5	7	1214-8_bc1_11_bc2_16_bc3_85	12	37
	1214-7_bc1_12_bc2_66_bc3_18	4	4	1214-8_bc1_11_bc2_17_bc3_36	103	9943
	1214-7_bc1_12_bc2_66_bc3_19	6	7	1214-8_bc1_11_bc2_17_bc3_4	23	25
	1214-7_bc1_12_bc2_66_bc3_2	1	1	1214-8_bc1_11_bc2_17_bc3_66	5	6
	1214-7_bc1_12_bc2_66_bc3_20	2	2	1214-8_bc1_11_bc2_17_bc3_72	21	22
	1214-7_bc1_12_bc2_66_bc3_22	26	27	1214-8_bc1_11_bc2_18_bc3_12	10	10
	1214-7_bc1_12_bc2_66_bc3_23	4	4	1214-8_bc1_11_bc2_18_bc3_57	1	1
	1214-7_bc1_12_bc2_66_bc3_24	3	3	1214-8_bc1_11_bc2_18_bc3_62	475	726
	1214-7_bc1_12_bc2_66_bc3_25	10	13	1214-8_bc1_11_bc2_18_bc3_96	2	2
	1214-7_bc1_12_bc2_66_bc3_28	2	2	1214-8_bc1_11_bc2_19_bc3_58	101	790
	1214-7_bc1_12_bc2_66_bc3_29	1	1	1214-8_bc1_11_bc2_19_bc3_8	39	148
	1214-7_bc1_12_bc2_66_bc3_3	4	4	1214-8_bc1_11_bc2_20_bc3_25	7	20
	1214-7_bc1_12_bc2_66_bc3_32	4	4	1214-8_bc1_11_bc2_21_bc3_11	594	23080
	1214-7_bc1_12_bc2_66_bc3_33	5	8	1214-8_bc1_11_bc2_21_bc3_16	2	2
	1214-7_bc1_12_bc2_66_bc3_34	1	1	1214-8_bc1_11_bc2_21_bc3_3	14	2564
	1214-7_bc1_12_bc2_66_bc3_35	3	3	1214-8_bc1_11_bc2_21_bc3_40	1	2
	1214-7_bc1_12_bc2_66_bc3_37	1	1	1214-8_bc1_11_bc2_23_bc3_86	9	9
	1214-7_bc1_12_bc2_66_bc3_38	1	2	1214-8_bc1_11_bc2_24_bc3_11	2	3
	1214-7_bc1_12_bc2_66_bc3_42	2	3	1214-8_bc1_11_bc2_24_bc3_20	973	48560
	1214-7_bc1_12_bc2_66_bc3_44	3	3	1214-8_bc1_11_bc2_24_bc3_35	1	1
	1214-7_bc1_12_bc2_66_bc3_47	2	2	1214-8_bc1_11_bc2_24_bc3_48	2	2
	1214-7_bc1_12_bc2_66_bc3_48	32	38	1214-8_bc1_11_bc2_24_bc3_75	9	10
	1214-7_bc1_12_bc2_66_bc3_49	2	2	1214-8_bc1_11_bc2_24_bc3_90	3	4
	1214-7_bc1_12_bc2_66_bc3_5	2	2	1214-8_bc1_11_bc2_24_bc3_93	19	20
	1214-7_bc1_12_bc2_66_bc3_50	1	1	1214-8_bc1_11_bc2_25_bc3_3	367	33222
	1214-7_bc1_12_bc2_66_bc3_51	2	2	1214-8_bc1_11_bc2_25_bc3_30	3	4
	1214-7_bc1_12_bc2_66_bc3_52	6	7	1214-8_bc1_11_bc2_25_bc3_48	3	5
	1214-7_bc1_12_bc2_66_bc3_53	3	3	1214-8_bc1_11_bc2_25_bc3_57	1	1
	1214-7_bc1_12_bc2_66_bc3_55	3	3	1214-8_bc1_11_bc2_25_bc3_69	5	5
	1214-7_bc1_12_bc2_66_bc3_57	5	6	1214-8_bc1_11_bc2_25_bc3_80	4	5
	1214-7_bc1_12_bc2_66_bc3_58	52	101	1214-8_bc1_11_bc2_25_bc3_93	500	29885
	1214-7_bc1_12_bc2_66_bc3_60	5	5	1214-8_bc1_11_bc2_26_bc3_20	4	5
	1214-7_bc1_12_bc2_66_bc3_61	1	1	1214-8_bc1_11_bc2_26_bc3_3	5	6
	1214-7_bc1_12_bc2_66_bc3_62	1	2	1214-8_bc1_11_bc2_27_bc3_29	55	3221
	1214-7_bc1_12_bc2_66_bc3_64	1	1	1214-8_bc1_11_bc2_28_bc3_8	6	13
	1214-7_bc1_12_bc2_66_bc3_65	6	6	1214-8_bc1_11_bc2_28_bc3_94	9	9
	1214-7_bc1_12_bc2_66_bc3_66	3	4	1214-8_bc1_11_bc2_29_bc3_24	15	1529
	1214-7_bc1_12_bc2_66_bc3_67	3	4	1214-8_bc1_11_bc2_3_bc3_21	80	90
	1214-7_bc1_12_bc2_66_bc3_73	2429	100951	1214-8_bc1_11_bc2_3_bc3_50	115	14429
	1214-7_bc1_12_bc2_66_bc3_75	3	4	1214-8_bc1_11_bc2_30_bc3_10	14	16
	1214-7_bc1_12_bc2_66_bc3_78	3	4	1214-8_bc1_11_bc2_30_bc3_43	120	7407
	1214-7_bc1_12_bc2_66_bc3_79	11	14	1214-8_bc1_11_bc2_31_bc3_3	16	17
	1214-7_bc1_12_bc2_66_bc3_84	16	44	1214-8_bc1_11_bc2_31_bc3_4	51	68
	1214-7_bc1_12_bc2_66_bc3_85	3	4	1214-8_bc1_11_bc2_31_bc3_93	9	1553
	1214-7_bc1_12_bc2_66_bc3_86	3	4	1214-8_bc1_11_bc2_32_bc3_5	3	12
	1214-7_bc1_12_bc2_66_bc3_87	2	2	1214-8_bc1_11_bc2_32_bc3_58	18	21
	1214-7_bc1_12_bc2_66_bc3_90	3	3	1214-8_bc1_11_bc2_32_bc3_65	61	488
	1214-7_bc1_12_bc2_66_bc3_94	1	2	1214-8_bc1_11_bc2_33_bc3_13	1	1
	1214-7_bc1_12_bc2_66_bc3_95	7	7	1214-8_bc1_11_bc2_33_bc3_19	9	9
	1214-7_bc1_12_bc2_66_bc3_96	1	1	1214-8_bc1_11_bc2_33_bc3_31	12	14
	1214-7_bc1_12_bc2_67_bc3_73	4	6	1214-8_bc1_11_bc2_33_bc3_41	79	90
	1214-7_bc1_12_bc2_67_bc3_96	10	48	1214-8_bc1_11_bc2_34_bc3_23	25	25
	1214-7_bc1_12_bc2_69_bc3_84	5	5	1214-8_bc1_11_bc2_34_bc3_33	61	2924
	1214-7_bc1_12_bc2_71_bc3_16	24	29	1214-8_bc1_11_bc2_34_bc3_42	35	38
	1214-7_bc1_12_bc2_71_bc3_9	3	9	1214-8_bc1_11_bc2_34_bc3_55	1	1
	1214-7_bc1_12_bc2_74_bc3_10	4	9	1214-8_bc1_11_bc2_35_bc3_26	3	3
	1214-7_bc1_12_bc2_74_bc3_53	6	48	1214-8_bc1_11_bc2_36_bc3_59	1	24
	1214-7_bc1_12_bc2_74_bc3_73	25	27	1214-8_bc1_11_bc2_36_bc3_74	103	3389
	1214-7_bc1_12_bc2_74_bc3_82	3	11	1214-8_bc1_11_bc2_37_bc3_62	92	98
	1214-7_bc1_12_bc2_75_bc3_35	2	22	1214-8_bc1_11_bc2_37_bc3_70	2	3
	1214-7_bc1_12_bc2_75_bc3_55	4	16	1214-8_bc1_11_bc2_38_bc3_27	43	9654
	1214-7_bc1_12_bc2_75_bc3_67	1	1	1214-8_bc1_11_bc2_38_bc3_35	8	8
	1214-7_bc1_12_bc2_76_bc3_67	11	67	1214-8_bc1_11_bc2_38_bc3_39	11	2754
	1214-7_bc1_12_bc2_78_bc3_34	2	3	1214-8_bc1_11_bc2_39_bc3_33	13	14
	1214-7_bc1_12_bc2_78_bc3_63	147	24131	1214-8_bc1_11_bc2_39_bc3_45	11	13
	1214-7_bc1_12_bc2_79_bc3_68	68	315	1214-8_bc1_11_bc2_39_bc3_53	1	2
	1214-7_bc1_12_bc2_8_bc3_18	3	3	1214-8_bc1_11_bc2_4_bc3_14	3	3
	1214-7_bc1_12_bc2_80_bc3_16	258	2460	1214-8_bc1_11_bc2_4_bc3_29	10	11
	1214-7_bc1_12_bc2_80_bc3_43	77	4392	1214-8_bc1_11_bc2_4_bc3_70	21	22
	1214-7_bc1_12_bc2_80_bc3_67	2	2	1214-8_bc1_11_bc2_41_bc3_72	30	2938
	1214-7_bc1_12_bc2_81_bc3_26	25	27	1214-8_bc1_11_bc2_42_bc3_16	27	3371
	1214-7_bc1_12_bc2_82_bc3_47	1	4	1214-8_bc1_11_bc2_44_bc3_11	7	8
	1214-7_bc1_12_bc2_82_bc3_59	1	1	1214-8_bc1_11_bc2_44_bc3_18	4	5
	1214-7_bc1_12_bc2_83_bc3_4	24	27	1214-8_bc1_11_bc2_44_bc3_27	3	3
	1214-7_bc1_12_bc2_83_bc3_44	3	3	1214-8_bc1_11_bc2_44_bc3_35	3	5
	1214-7_bc1_12_bc2_84_bc3_15	75	90	1214-8_bc1_11_bc2_44_bc3_37	4	4
	1214-7_bc1_12_bc2_85_bc3_37	2	16	1214-8_bc1_11_bc2_44_bc3_40	2	2
	1214-7_bc1_12_bc2_85_bc3_64	2	2	1214-8_bc1_11_bc2_44_bc3_45	2	2
	1214-7_bc1_12_bc2_86_bc3_93	1	3	1214-8_bc1_11_bc2_44_bc3_5	54	57
	1214-7_bc1_12_bc2_87_bc3_38	1	1	1214-8_bc1_11_bc2_44_bc3_51	3	5
	1214-7_bc1_12_bc2_87_bc3_93	4	10	1214-8_bc1_11_bc2_44_bc3_54	132	10920
	1214-7_bc1_12_bc2_88_bc3_6	3	19	1214-8_bc1_11_bc2_44_bc3_6	5	5
	1214-7_bc1_12_bc2_88_bc3_73	13	13	1214-8_bc1_11_bc2_44_bc3_60	5	10
	1214-7_bc1_12_bc2_88_bc3_85	10	52	1214-8_bc1_11_bc2_44_bc3_61	4	4
	1214-7_bc1_12_bc2_89_bc3_19	4	4	1214-8_bc1_11_bc2_44_bc3_63	3	3
	1214-7_bc1_12_bc2_89_bc3_49	2	11	1214-8_bc1_11_bc2_44_bc3_65	674	71461
	1214-7_bc1_12_bc2_89_bc3_57	2	2	1214-8_bc1_11_bc2_44_bc3_75	4	4
	1214-7_bc1_12_bc2_89_bc3_73	3	3	1214-8_bc1_11_bc2_44_bc3_84	2	5
	1214-7_bc1_12_bc2_89_bc3_84	4	5	1214-8_bc1_11_bc2_45_bc3_30	53	2447
	1214-7_bc1_12_bc2_89_bc3_85	1	1	1214-8_bc1_11_bc2_47_bc3_14	33	6354
	1214-7_bc1_12_bc2_89_bc3_87	645	24429	1214-8_bc1_11_bc2_48_bc3_39	13	15
	1214-7_bc1_12_bc2_89_bc3_92	3	13	1214-8_bc1_11_bc2_48_bc3_77	12	13
	1214-7_bc1_12_bc2_89_bc3_95	1	1	1214-8_bc1_11_bc2_49_bc3_32	7	9
	1214-7_bc1_12_bc2_9_bc3_16	2	2	1214-8_bc1_11_bc2_49_bc3_58	7	9
	1214-7_bc1_12_bc2_9_bc3_64	5	18	1214-8_bc1_11_bc2_49_bc3_86	8	13
	1214-7_bc1_12_bc2_90_bc3_48	5	31	1214-8_bc1_11_bc2_49_bc3_92	685	68973
	1214-7_bc1_12_bc2_90_bc3_55	1	10	1214-8_bc1_11_bc2_5_bc3_60	9	175
	1214-7_bc1_12_bc2_90_bc3_60	15	19	1214-8_bc1_11_bc2_50_bc3_11	3	3
	1214-7_bc1_12_bc2_91_bc3_49	9	35	1214-8_bc1_11_bc2_50_bc3_13	14	51
	1214-7_bc1_12_bc2_93_bc3_55	1	5	1214-8_bc1_11_bc2_50_bc3_30	4	4
	1214-7_bc1_12_bc2_93_bc3_88	1	1	1214-8_bc1_11_bc2_50_bc3_33	3	3
	1214-7_bc1_12_bc2_94_bc3_69	18	19	1214-8_bc1_11_bc2_50_bc3_42	606	18460
	1214-7_bc1_12_bc2_95_bc3_14	9	21	1214-8_bc1_11_bc2_50_bc3_51	2	2
	1214-7_bc1_13_bc2_10_bc3_21	10	10	1214-8_bc1_11_bc2_50_bc3_62	245	28689
	1214-7_bc1_13_bc2_11_bc3_43	3	14	1214-8_bc1_11_bc2_50_bc3_80	4	5
	1214-7_bc1_13_bc2_11_bc3_49	19	21	1214-8_bc1_11_bc2_50_bc3_83	2	2
	1214-7_bc1_13_bc2_12_bc3_3	57	83	1214-8_bc1_11_bc2_50_bc3_86	5	6
	1214-7_bc1_13_bc2_12_bc3_91	4	19	1214-8_bc1_11_bc2_50_bc3_87	2	3
	1214-7_bc1_13_bc2_13_bc3_14	1	1	1214-8_bc1_11_bc2_50_bc3_88	3	8
	1214-7_bc1_13_bc2_13_bc3_67	1	2	1214-8_bc1_11_bc2_53_bc3_61	3	3
	1214-7_bc1_13_bc2_13_bc3_78	243	3390	1214-8_bc1_11_bc2_53_bc3_75	6	8
	1214-7_bc1_13_bc2_14_bc3_39	5	17	1214-8_bc1_11_bc2_54_bc3_15	109	148
	1214-7_bc1_13_bc2_15_bc3_20	2	2	1214-8_bc1_11_bc2_54_bc3_29	36	38
	1214-7_bc1_13_bc2_16_bc3_38	3	22	1214-8_bc1_11_bc2_56_bc3_53	16	18
	1214-7_bc1_13_bc2_17_bc3_91	6	9	1214-8_bc1_11_bc2_56_bc3_68	339	43050
	1214-7_bc1_13_bc2_18_bc3_20	2	6	1214-8_bc1_11_bc2_56_bc3_95	3	4
	1214-7_bc1_13_bc2_2_bc3_63	1	1	1214-8_bc1_11_bc2_57_bc3_11	4	15
	1214-7_bc1_13_bc2_21_bc3_41	9	22	1214-8_bc1_11_bc2_59_bc3_75	3	8
	1214-7_bc1_13_bc2_22_bc3_78	1	1	1214-8_bc1_11_bc2_6_bc3_50	9	10
	1214-7_bc1_13_bc2_23_bc3_45	21	24	1214-8_bc1_11_bc2_60_bc3_85	6	9
	1214-7_bc1_13_bc2_25_bc3_77	374	16345	1214-8_bc1_11_bc2_61_bc3_32	32	3511
	1214-7_bc1_13_bc2_26_bc3_5	3	15	1214-8_bc1_11_bc2_62_bc3_22	2	2
	1214-7_bc1_13_bc2_26_bc3_57	37	44	1214-8_bc1_11_bc2_62_bc3_47	104	2236
	1214-7_bc1_13_bc2_26_bc3_58	23	23	1214-8_bc1_11_bc2_62_bc3_5	6	7
	1214-7_bc1_13_bc2_26_bc3_59	351	19935	1214-8_bc1_11_bc2_62_bc3_78	52	2792
	1214-7_bc1_13_bc2_27_bc3_57	1	2	1214-8_bc1_11_bc2_63_bc3_28	23	27
	1214-7_bc1_13_bc2_28_bc3_16	8	19	1214-8_bc1_11_bc2_63_bc3_79	3	6
	1214-7_bc1_13_bc2_28_bc3_67	2	2	1214-8_bc1_11_bc2_64_bc3_76	3	5
	1214-7_bc1_13_bc2_30_bc3_3	22	4640	1214-8_bc1_11_bc2_64_bc3_88	63	5250
	1214-7_bc1_13_bc2_31_bc3_15	6	26	1214-8_bc1_11_bc2_64_bc3_94	6	6
	1214-7_bc1_13_bc2_32_bc3_14	32	6153	1214-8_bc1_11_bc2_65_bc3_46	48	610
	1214-7_bc1_13_bc2_32_bc3_70	3	16	1214-8_bc1_11_bc2_65_bc3_66	19	21
	1214-7_bc1_13_bc2_33_bc3_67	23	26	1214-8_bc1_11_bc2_65_bc3_67	51	1474
	1214-7_bc1_13_bc2_34_bc3_78	5	31	1214-8_bc1_11_bc2_66_bc3_3	16	31
	1214-7_bc1_13_bc2_34_bc3_90	32	135	1214-8_bc1_11_bc2_66_bc3_52	440	21902
	1214-7_bc1_13_bc2_34_bc3_94	39	271	1214-8_bc1_11_bc2_66_bc3_73	114	1766
	1214-7_bc1_13_bc2_35_bc3_26	54	258	1214-8_bc1_11_bc2_66_bc3_95	5	6
	1214-7_bc1_13_bc2_35_bc3_70	1	1	1214-8_bc1_11_bc2_67_bc3_25	7	17
	1214-7_bc1_13_bc2_35_bc3_72	2	2	1214-8_bc1_11_bc2_67_bc3_38	30	3800
	1214-7_bc1_13_bc2_35_bc3_75	21	23	1214-8_bc1_11_bc2_67_bc3_4	244	8346
	1214-7_bc1_13_bc2_35_bc3_79	263	32263	1214-8_bc1_11_bc2_7_bc3_77	1	8
	1214-7_bc1_13_bc2_35_bc3_80	78	94	1214-8_bc1_11_bc2_70_bc3_11	2	2
	1214-7_bc1_13_bc2_37_bc3_90	2	7	1214-8_bc1_11_bc2_70_bc3_75	427	31311
	1214-7_bc1_13_bc2_39_bc3_28	31	41	1214-8_bc1_11_bc2_70_bc3_86	12	15
	1214-7_bc1_13_bc2_4_bc3_96	126	145	1214-8_bc1_11_bc2_71_bc3_18	50	2473
	1214-7_bc1_13_bc2_43_bc3_52	115	5062	1214-8_bc1_11_bc2_72_bc3_36	33	33
	1214-7_bc1_13_bc2_47_bc3_66	18	18	1214-8_bc1_11_bc2_72_bc3_6	23	816
	1214-7_bc1_13_bc2_5_bc3_35	7	8	1214-8_bc1_11_bc2_73_bc3_29	83	3947
	1214-7_bc1_13_bc2_50_bc3_5	24	6647	1214-8_bc1_11_bc2_73_bc3_57	89	103
	1214-7_bc1_13_bc2_50_bc3_58	8	9	1214-8_bc1_11_bc2_73_bc3_95	2	2
	1214-7_bc1_13_bc2_50_bc3_90	5	17	1214-8_bc1_11_bc2_74_bc3_11	4	5
	1214-7_bc1_13_bc2_52_bc3_58	2	2	1214-8_bc1_11_bc2_74_bc3_12	5	6
	1214-7_bc1_13_bc2_52_bc3_72	14	41	1214-8_bc1_11_bc2_74_bc3_14	27	33
	1214-7_bc1_13_bc2_52_bc3_73	231	3648	1214-8_bc1_11_bc2_74_bc3_16	3	4
	1214-7_bc1_13_bc2_53_bc3_48	8	24	1214-8_bc1_11_bc2_74_bc3_18	4	4
	1214-7_bc1_13_bc2_53_bc3_71	1	7	1214-8_bc1_11_bc2_74_bc3_2	4	4
	1214-7_bc1_13_bc2_53_bc3_84	2	7	1214-8_bc1_11_bc2_74_bc3_20	9	11
	1214-7_bc1_13_bc2_54_bc3_55	1	6	1214-8_bc1_11_bc2_74_bc3_21	4	6
	1214-7_bc1_13_bc2_54_bc3_91	2	5	1214-8_bc1_11_bc2_74_bc3_22	1158	67095
	1214-7_bc1_13_bc2_56_bc3_18	19	81	1214-8_bc1_11_bc2_74_bc3_24	6	7
	1214-7_bc1_13_bc2_57_bc3_58	18	24	1214-8_bc1_11_bc2_74_bc3_25	1	1
	1214-7_bc1_13_bc2_6_bc3_29	18	118	1214-8_bc1_11_bc2_74_bc3_26	4	4
	1214-7_bc1_13_bc2_6_bc3_30	2	2	1214-8_bc1_11_bc2_74_bc3_29	1	2
	1214-7_bc1_13_bc2_61_bc3_9	28	31	1214-8_bc1_11_bc2_74_bc3_30	4	5
	1214-7_bc1_13_bc2_63_bc3_72	167	4345	1214-8_bc1_11_bc2_74_bc3_31	2	4
	1214-7_bc1_13_bc2_64_bc3_12	1	6	1214-8_bc1_11_bc2_74_bc3_34	16	2310
	1214-7_bc1_13_bc2_64_bc3_22	65	145	1214-8_bc1_11_bc2_74_bc3_35	4	5
	1214-7_bc1_13_bc2_64_bc3_67	2	2	1214-8_bc1_11_bc2_74_bc3_36	12	12
	1214-7_bc1_13_bc2_64_bc3_90	392	32952	1214-8_bc1_11_bc2_74_bc3_37	5	5
	1214-7_bc1_13_bc2_65_bc3_16	32	34	1214-8_bc1_11_bc2_74_bc3_4	2	2
	1214-7_bc1_13_bc2_65_bc3_41	3	4	1214-8_bc1_11_bc2_74_bc3_40	3	3
	1214-7_bc1_13_bc2_65_bc3_51	5	7	1214-8_bc1_11_bc2_74_bc3_41	108	1611
	1214-7_bc1_13_bc2_65_bc3_90	7	14	1214-8_bc1_11_bc2_74_bc3_42	5	5
	1214-7_bc1_13_bc2_66_bc3_63	117	147	1214-8_bc1_11_bc2_74_bc3_43	6	6
	1214-7_bc1_13_bc2_66_bc3_67	2	2	1214-8_bc1_11_bc2_74_bc3_47	4	5
	1214-7_bc1_13_bc2_66_bc3_73	4	4	1214-8_bc1_11_bc2_74_bc3_52	4	6
	1214-7_bc1_13_bc2_66_bc3_84	5	5	1214-8_bc1_11_bc2_74_bc3_53	6	15
	1214-7_bc1_13_bc2_67_bc3_88	11	25	1214-8_bc1_11_bc2_74_bc3_54	1	1
	1214-7_bc1_13_bc2_68_bc3_66	5	44	1214-8_bc1_11_bc2_74_bc3_57	3	3
	1214-7_bc1_13_bc2_69_bc3_60	3	9	1214-8_bc1_11_bc2_74_bc3_58	3	4
	1214-7_bc1_13_bc2_69_bc3_84	39	42	1214-8_bc1_11_bc2_74_bc3_6	1	2
	1214-7_bc1_13_bc2_71_bc3_46	10	15	1214-8_bc1_11_bc2_74_bc3_62	2	2
	1214-7_bc1_13_bc2_73_bc3_1	8	21	1214-8_bc1_11_bc2_74_bc3_66	3	5
	1214-7_bc1_13_bc2_73_bc3_16	2	3	1214-8_bc1_11_bc2_74_bc3_68	2	2
	1214-7_bc1_13_bc2_73_bc3_19	1	1	1214-8_bc1_11_bc2_74_bc3_70	4	6
	1214-7_bc1_13_bc2_73_bc3_25	18	21	1214-8_bc1_11_bc2_74_bc3_71	2	2
	1214-7_bc1_13_bc2_73_bc3_37	1	1	1214-8_bc1_11_bc2_74_bc3_72	1	1
	1214-7_bc1_13_bc2_73_bc3_39	296	15042	1214-8_bc1_11_bc2_74_bc3_73	5	6
	1214-7_bc1_13_bc2_73_bc3_45	4	4	1214-8_bc1_11_bc2_74_bc3_76	2	2
	1214-7_bc1_13_bc2_73_bc3_60	3	3	1214-8_bc1_11_bc2_74_bc3_77	1	1
	1214-7_bc1_13_bc2_73_bc3_64	2	3	1214-8_bc1_11_bc2_74_bc3_8	2	2
	1214-7_bc1_13_bc2_73_bc3_73	1	1	1214-8_bc1_11_bc2_74_bc3_82	5	9
	1214-7_bc1_13_bc2_73_bc3_77	1	2	1214-8_bc1_11_bc2_74_bc3_85	4	4
	1214-7_bc1_13_bc2_73_bc3_78	1	1	1214-8_bc1_11_bc2_74_bc3_88	1	1
	1214-7_bc1_13_bc2_73_bc3_85	29	31	1214-8_bc1_11_bc2_74_bc3_89	6	8
	1214-7_bc1_13_bc2_73_bc3_86	467	13522	1214-8_bc1_11_bc2_74_bc3_9	3	3
	1214-7_bc1_13_bc2_74_bc3_12	14	15	1214-8_bc1_11_bc2_74_bc3_91	1	1
	1214-7_bc1_13_bc2_74_bc3_16	528	30851	1214-8_bc1_11_bc2_74_bc3_92	62	11292
	1214-7_bc1_13_bc2_74_bc3_17	2	2	1214-8_bc1_11_bc2_74_bc3_95	1	1
	1214-7_bc1_13_bc2_74_bc3_2	5	8	1214-8_bc1_11_bc2_74_bc3_96	7	8
	1214-7_bc1_13_bc2_74_bc3_73	285	2745	1214-8_bc1_11_bc2_75_bc3_21	2	2
	1214-7_bc1_13_bc2_74_bc3_78	3	4	1214-8_bc1_11_bc2_75_bc3_52	595	56192
	1214-7_bc1_13_bc2_74_bc3_84	2	2	1214-8_bc1_11_bc2_75_bc3_67	3	4
	1214-7_bc1_13_bc2_74_bc3_85	3	3	1214-8_bc1_11_bc2_75_bc3_68	2	2
	1214-7_bc1_13_bc2_74_bc3_95	13	18	1214-8_bc1_11_bc2_75_bc3_73	5	5
	1214-7_bc1_13_bc2_75_bc3_16	1	1	1214-8_bc1_11_bc2_75_bc3_75	5	5
	1214-7_bc1_13_bc2_75_bc3_17	2	2	1214-8_bc1_11_bc2_75_bc3_80	8	9
	1214-7_bc1_13_bc2_75_bc3_32	20	21	1214-8_bc1_11_bc2_75_bc3_83	14	15
	1214-7_bc1_13_bc2_75_bc3_33	115	863	1214-8_bc1_11_bc2_75_bc3_85	3	3
	1214-7_bc1_13_bc2_75_bc3_35	1	1	1214-8_bc1_11_bc2_75_bc3_92	4	6
	1214-7_bc1_13_bc2_75_bc3_40	1	3	1214-8_bc1_11_bc2_75_bc3_95	9	11
	1214-7_bc1_13_bc2_75_bc3_6	2	2	1214-8_bc1_11_bc2_76_bc3_11	3	5
	1214-7_bc1_13_bc2_75_bc3_72	1	1	1214-8_bc1_11_bc2_77_bc3_16	3	3
	1214-7_bc1_13_bc2_75_bc3_73	5	22	1214-8_bc1_11_bc2_77_bc3_2	2	4
	1214-7_bc1_13_bc2_75_bc3_75	475	14526	1214-8_bc1_11_bc2_77_bc3_45	2	2
	1214-7_bc1_13_bc2_75_bc3_80	1	2	1214-8_bc1_11_bc2_77_bc3_6	150	2441
	1214-7_bc1_13_bc2_75_bc3_84	4	4	1214-8_bc1_11_bc2_77_bc3_66	13	15
	1214-7_bc1_13_bc2_75_bc3_90	3	3	1214-8_bc1_11_bc2_79_bc3_2	7	16
	1214-7_bc1_13_bc2_75_bc3_94	3	3	1214-8_bc1_11_bc2_8_bc3_91	8	9
	1214-7_bc1_13_bc2_75_bc3_96	1	1	1214-8_bc1_11_bc2_80_bc3_15	98	3116
	1214-7_bc1_13_bc2_76_bc3_38	4	13	1214-8_bc1_11_bc2_80_bc3_16	2	2
	1214-7_bc1_13_bc2_76_bc3_41	10	46	1214-8_bc1_11_bc2_80_bc3_34	42	49
	1214-7_bc1_13_bc2_77_bc3_1	388	459	1214-8_bc1_11_bc2_81_bc3_37	16	16
	1214-7_bc1_13_bc2_77_bc3_55	2	2	1214-8_bc1_11_bc2_81_bc3_70	341	35587
	1214-7_bc1_13_bc2_77_bc3_95	1	1	1214-8_bc1_11_bc2_81_bc3_72	2	2
	1214-7_bc1_13_bc2_78_bc3_13	105	8025	1214-8_bc1_11_bc2_81_bc3_77	1	1
	1214-7_bc1_13_bc2_78_bc3_61	1	1	1214-8_bc1_11_bc2_81_bc3_92	1	1
	1214-7_bc1_13_bc2_8_bc3_18	24	28	1214-8_bc1_11_bc2_82_bc3_23	1	1
	1214-7_bc1_13_bc2_8_bc3_37	6	46	1214-8_bc1_11_bc2_82_bc3_72	14	17
	1214-7_bc1_13_bc2_80_bc3_16	35	39	1214-8_bc1_11_bc2_83_bc3_73	1	1
	1214-7_bc1_13_bc2_82_bc3_25	7	8	1214-8_bc1_11_bc2_83_bc3_76	1	1
	1214-7_bc1_13_bc2_82_bc3_63	31	37	1214-8_bc1_11_bc2_83_bc3_88	429	19172
	1214-7_bc1_13_bc2_84_bc3_25	55	66	1214-8_bc1_11_bc2_83_bc3_89	3	3
	1214-7_bc1_13_bc2_84_bc3_71	1	1	1214-8_bc1_11_bc2_84_bc3_16	118	3923
	1214-7_bc1_13_bc2_85_bc3_4	26	37	1214-8_bc1_11_bc2_84_bc3_69	4	4
	1214-7_bc1_13_bc2_87_bc3_19	1	1	1214-8_bc1_11_bc2_84_bc3_72	108	1281
	1214-7_bc1_13_bc2_87_bc3_44	2	8	1214-8_bc1_11_bc2_84_bc3_77	27	29
	1214-7_bc1_13_bc2_89_bc3_1	2	2	1214-8_bc1_11_bc2_84_bc3_81	1	1
	1214-7_bc1_13_bc2_89_bc3_19	496	43678	1214-8_bc1_11_bc2_85_bc3_84	370	22972
	1214-7_bc1_13_bc2_89_bc3_29	4	6	1214-8_bc1_11_bc2_86_bc3_2	3	4
	1214-7_bc1_13_bc2_89_bc3_43	3	3	1214-8_bc1_11_bc2_86_bc3_43	2	7
	1214-7_bc1_13_bc2_89_bc3_66	7	7	1214-8_bc1_11_bc2_87_bc3_10	17	2293
	1214-7_bc1_13_bc2_89_bc3_82	22	4046	1214-8_bc1_11_bc2_87_bc3_21	17	17
	1214-7_bc1_13_bc2_90_bc3_60	21	23	1214-8_bc1_11_bc2_89_bc3_79	80	4505
	1214-7_bc1_13_bc2_90_bc3_83	6	41	1214-8_bc1_11_bc2_9_bc3_83	12	2307
	1214-7_bc1_13_bc2_90_bc3_90	2	3	1214-8_bc1_11_bc2_90_bc3_77	115	3815
	1214-7_bc1_13_bc2_92_bc3_74	196	14400	1214-8_bc1_11_bc2_90_bc3_86	33	50
	1214-7_bc1_13_bc2_93_bc3_42	1	1	1214-8_bc1_11_bc2_92_bc3_19	21	21
	1214-7_bc1_13_bc2_95_bc3_57	1	1	1214-8_bc1_11_bc2_92_bc3_49	33	2108
	1214-7_bc1_13_bc2_96_bc3_54	486	10755	1214-8_bc1_11_bc2_95_bc3_33	19	23
	1214-7_bc1_14_bc2_10_bc3_12	10	17	1214-8_bc1_11_bc2_95_bc3_76	2	2
	1214-7_bc1_14_bc2_10_bc3_46	5	19	1214-8_bc1_11_bc2_95_bc3_78	3	3
	1214-7_bc1_14_bc2_11_bc3_51	4	4	1214-8_bc1_11_bc2_95_bc3_87	3	3
	1214-7_bc1_14_bc2_12_bc3_44	36	42	1214-8_bc1_11_bc2_95_bc3_88	60	68
	1214-7_bc1_14_bc2_12_bc3_49	10	13	1214-8_bc1_11_bc2_96_bc3_1	54	6917
	1214-7_bc1_14_bc2_13_bc3_5	18	24	1214-8_bc1_11_bc2_96_bc3_57	10	12
	1214-7_bc1_14_bc2_13_bc3_68	1	4	1214-8_bc1_12_bc2_1_bc3_23	3	4
	1214-7_bc1_14_bc2_15_bc3_88	22	25	1214-8_bc1_12_bc2_1_bc3_47	71	1189
	1214-7_bc1_14_bc2_15_bc3_96	12	13	1214-8_bc1_12_bc2_10_bc3_25	13	16
	1214-7_bc1_14_bc2_16_bc3_31	26	30	1214-8_bc1_12_bc2_10_bc3_44	367	14756
	1214-7_bc1_14_bc2_16_bc3_55	2	2	1214-8_bc1_12_bc2_10_bc3_5	57	66
	1214-7_bc1_14_bc2_18_bc3_44	7	7	1214-8_bc1_12_bc2_11_bc3_51	46	68
	1214-7_bc1_14_bc2_2_bc3_12	12	17	1214-8_bc1_12_bc2_13_bc3_2	1	1
	1214-7_bc1_14_bc2_2_bc3_19	12	13	1214-8_bc1_12_bc2_13_bc3_21	3	3
	1214-7_bc1_14_bc2_2_bc3_92	245	3954	1214-8_bc1_12_bc2_13_bc3_32	264	17773
	1214-7_bc1_14_bc2_20_bc3_46	413	1401	1214-8_bc1_12_bc2_14_bc3_54	1	1
	1214-7_bc1_14_bc2_20_bc3_50	1	11	1214-8_bc1_12_bc2_14_bc3_72	6	6
	1214-7_bc1_14_bc2_21_bc3_33	2	2	1214-8_bc1_12_bc2_15_bc3_21	1	1
	1214-7_bc1_14_bc2_21_bc3_34	45	53	1214-8_bc1_12_bc2_15_bc3_55	74	1934
	1214-7_bc1_14_bc2_25_bc3_52	18	20	1214-8_bc1_12_bc2_15_bc3_74	2	3
	1214-7_bc1_14_bc2_26_bc3_57	1	1	1214-8_bc1_12_bc2_15_bc3_81	1	1
	1214-7_bc1_14_bc2_26_bc3_80	1	12	1214-8_bc1_12_bc2_16_bc3_66	1	2
	1214-7_bc1_14_bc2_26_bc3_83	5	6	1214-8_bc1_12_bc2_17_bc3_28	90	9767
	1214-7_bc1_14_bc2_26_bc3_96	34	43	1214-8_bc1_12_bc2_18_bc3_66	18	26
	1214-7_bc1_14_bc2_28_bc3_1	18	20	1214-8_bc1_12_bc2_19_bc3_13	17	18
	1214-7_bc1_14_bc2_28_bc3_31	1	4	1214-8_bc1_12_bc2_19_bc3_34	13	15
	1214-7_bc1_14_bc2_28_bc3_32	42	50	1214-8_bc1_12_bc2_19_bc3_38	11	12
	1214-7_bc1_14_bc2_28_bc3_70	343	399	1214-8_bc1_12_bc2_2_bc3_78	16	18
	1214-7_bc1_14_bc2_28_bc3_8	1	1	1214-8_bc1_12_bc2_20_bc3_47	64	2859
	1214-7_bc1_14_bc2_28_bc3_84	5	5	1214-8_bc1_12_bc2_20_bc3_58	3	4
	1214-7_bc1_14_bc2_28_bc3_94	1	1	1214-8_bc1_12_bc2_20_bc3_96	13	36
	1214-7_bc1_14_bc2_29_bc3_28	1	1	1214-8_bc1_12_bc2_21_bc3_13	6	22
	1214-7_bc1_14_bc2_3_bc3_18	428	28811	1214-8_bc1_12_bc2_22_bc3_27	2	6
	1214-7_bc1_14_bc2_3_bc3_25	23	29	1214-8_bc1_12_bc2_22_bc3_45	6	23
	1214-7_bc1_14_bc2_3_bc3_28	5	5	1214-8_bc1_12_bc2_22_bc3_91	1	1
	1214-7_bc1_14_bc2_3_bc3_5	1	1	1214-8_bc1_12_bc2_22_bc3_93	13	14
	1214-7_bc1_14_bc2_30_bc3_71	3	24	1214-8_bc1_12_bc2_23_bc3_16	1	1
	1214-7_bc1_14_bc2_30_bc3_91	164	4950	1214-8_bc1_12_bc2_23_bc3_35	1	2
	1214-7_bc1_14_bc2_33_bc3_67	18	27	1214-8_bc1_12_bc2_23_bc3_4	3	4
	1214-7_bc1_14_bc2_33_bc3_80	1	1	1214-8_bc1_12_bc2_23_bc3_40	4	4
	1214-7_bc1_14_bc2_34_bc3_31	2	3	1214-8_bc1_12_bc2_23_bc3_41	3	5
	1214-7_bc1_14_bc2_34_bc3_48	3	4	1214-8_bc1_12_bc2_23_bc3_42	1	1
	1214-7_bc1_14_bc2_35_bc3_37	242	5861	1214-8_bc1_12_bc2_23_bc3_45	1	1
	1214-7_bc1_14_bc2_35_bc3_71	3	15	1214-8_bc1_12_bc2_23_bc3_47	2	2
	1214-7_bc1_14_bc2_37_bc3_46	33	34	1214-8_bc1_12_bc2_23_bc3_54	4	5
	1214-7_bc1_14_bc2_37_bc3_94	9	36	1214-8_bc1_12_bc2_23_bc3_57	137	5008
	1214-7_bc1_14_bc2_39_bc3_28	22	24	1214-8_bc1_12_bc2_23_bc3_63	4	4
	1214-7_bc1_14_bc2_39_bc3_41	243	292	1214-8_bc1_12_bc2_23_bc3_66	2	2
	1214-7_bc1_14_bc2_4_bc3_13	3	3	1214-8_bc1_12_bc2_23_bc3_7	2	2
	1214-7_bc1_14_bc2_4_bc3_40	7	8	1214-8_bc1_12_bc2_23_bc3_73	3	4
	1214-7_bc1_14_bc2_4_bc3_77	192	15036	1214-8_bc1_12_bc2_23_bc3_74	2	2
	1214-7_bc1_14_bc2_43_bc3_2	3	4	1214-8_bc1_12_bc2_23_bc3_75	4	5
	1214-7_bc1_14_bc2_44_bc3_1	1122	28434	1214-8_bc1_12_bc2_23_bc3_76	3	3
	1214-7_bc1_14_bc2_44_bc3_12	3	3	1214-8_bc1_12_bc2_23_bc3_77	1	2
	1214-7_bc1_14_bc2_44_bc3_14	2	2	1214-8_bc1_12_bc2_23_bc3_78	1	1
	1214-7_bc1_14_bc2_44_bc3_15	1	2	1214-8_bc1_12_bc2_23_bc3_8	2	2
	1214-7_bc1_14_bc2_44_bc3_16	1	2	1214-8_bc1_12_bc2_23_bc3_83	3	3
	1214-7_bc1_14_bc2_44_bc3_17	2	2	1214-8_bc1_12_bc2_23_bc3_86	3	3
	1214-7_bc1_14_bc2_44_bc3_18	2	2	1214-8_bc1_12_bc2_23_bc3_88	2	2
	1214-7_bc1_14_bc2_44_bc3_19	1	1	1214-8_bc1_12_bc2_23_bc3_90	1	1
	1214-7_bc1_14_bc2_44_bc3_2	1	1	1214-8_bc1_12_bc2_23_bc3_91	2	2
	1214-7_bc1_14_bc2_44_bc3_20	25	43	1214-8_bc1_12_bc2_23_bc3_93	3	5
	1214-7_bc1_14_bc2_44_bc3_21	3	3	1214-8_bc1_12_bc2_23_bc3_96	1	1
	1214-7_bc1_14_bc2_44_bc3_28	1	2	1214-8_bc1_12_bc2_24_bc3_20	19	20
	1214-7_bc1_14_bc2_44_bc3_3	2	2	1214-8_bc1_12_bc2_24_bc3_66	7	45
	1214-7_bc1_14_bc2_44_bc3_31	7	26	1214-8_bc1_12_bc2_24_bc3_73	18	22
	1214-7_bc1_14_bc2_44_bc3_34	2	2	1214-8_bc1_12_bc2_25_bc3_89	4	5
	1214-7_bc1_14_bc2_44_bc3_35	2	2	1214-8_bc1_12_bc2_25_bc3_95	3	7
	1214-7_bc1_14_bc2_44_bc3_37	3	3	1214-8_bc1_12_bc2_26_bc3_29	1	4
	1214-7_bc1_14_bc2_44_bc3_4	2	2	1214-8_bc1_12_bc2_26_bc3_3	4	4
	1214-7_bc1_14_bc2_44_bc3_43	2	4	1214-8_bc1_12_bc2_26_bc3_36	15	16
	1214-7_bc1_14_bc2_44_bc3_46	2	2	1214-8_bc1_12_bc2_26_bc3_84	19	34
	1214-7_bc1_14_bc2_44_bc3_53	3	3	1214-8_bc1_12_bc2_26_bc3_86	19	23
	1214-7_bc1_14_bc2_44_bc3_54	2	2	1214-8_bc1_12_bc2_27_bc3_78	207	253
	1214-7_bc1_14_bc2_44_bc3_55	1	1	1214-8_bc1_12_bc2_28_bc3_12	3	3
	1214-7_bc1_14_bc2_44_bc3_57	1	1	1214-8_bc1_12_bc2_28_bc3_18	2	3
	1214-7_bc1_14_bc2_44_bc3_58	2	3	1214-8_bc1_12_bc2_28_bc3_30	18	20
	1214-7_bc1_14_bc2_44_bc3_59	1	1	1214-8_bc1_12_bc2_28_bc3_35	3	3
	1214-7_bc1_14_bc2_44_bc3_66	2	2	1214-8_bc1_12_bc2_28_bc3_37	303	12284
	1214-7_bc1_14_bc2_44_bc3_67	2	3	1214-8_bc1_12_bc2_28_bc3_40	431	19728
	1214-7_bc1_14_bc2_44_bc3_75	1	1	1214-8_bc1_12_bc2_28_bc3_42	26	93
	1214-7_bc1_14_bc2_44_bc3_84	2	2	1214-8_bc1_12_bc2_28_bc3_48	1	1
	1214-7_bc1_14_bc2_44_bc3_90	1	1	1214-8_bc1_12_bc2_28_bc3_87	3	11
	1214-7_bc1_14_bc2_44_bc3_92	23	24	1214-8_bc1_12_bc2_28_bc3_94	4	5
	1214-7_bc1_14_bc2_44_bc3_94	1	1	1214-8_bc1_12_bc2_29_bc3_61	6	6
	1214-7_bc1_14_bc2_48_bc3_1	5	5	1214-8_bc1_12_bc2_31_bc3_43	90	6373
	1214-7_bc1_14_bc2_48_bc3_12	942	86420	1214-8_bc1_12_bc2_32_bc3_67	97	146
	1214-7_bc1_14_bc2_48_bc3_14	136	8810	1214-8_bc1_12_bc2_33_bc3_13	3	5
	1214-7_bc1_14_bc2_48_bc3_16	1	1	1214-8_bc1_12_bc2_33_bc3_6	71	84
	1214-7_bc1_14_bc2_48_bc3_19	7	10	1214-8_bc1_12_bc2_33_bc3_7	20	22
	1214-7_bc1_14_bc2_48_bc3_20	3	4	1214-8_bc1_12_bc2_33_bc3_80	49	1124
	1214-7_bc1_14_bc2_48_bc3_22	4	5	1214-8_bc1_12_bc2_34_bc3_20	4	10
	1214-7_bc1_14_bc2_48_bc3_28	5	5	1214-8_bc1_12_bc2_34_bc3_27	469	17872
	1214-7_bc1_14_bc2_48_bc3_33	3	3	1214-8_bc1_12_bc2_34_bc3_29	20	25
	1214-7_bc1_14_bc2_48_bc3_35	5	6	1214-8_bc1_12_bc2_34_bc3_5	2	2
	1214-7_bc1_14_bc2_48_bc3_44	40	404	1214-8_bc1_12_bc2_34_bc3_78	2	3
	1214-7_bc1_14_bc2_48_bc3_45	2	2	1214-8_bc1_12_bc2_35_bc3_26	4	5
	1214-7_bc1_14_bc2_48_bc3_53	5	6	1214-8_bc1_12_bc2_35_bc3_33	2	9
	1214-7_bc1_14_bc2_48_bc3_60	5	10	1214-8_bc1_12_bc2_35_bc3_67	1	1
	1214-7_bc1_14_bc2_48_bc3_63	36	45	1214-8_bc1_12_bc2_35_bc3_70	2	4
	1214-7_bc1_14_bc2_48_bc3_65	24	28	1214-8_bc1_12_bc2_35_bc3_87	1	1
	1214-7_bc1_14_bc2_48_bc3_72	2	3	1214-8_bc1_12_bc2_37_bc3_81	28	32
	1214-7_bc1_14_bc2_48_bc3_73	5	11	1214-8_bc1_12_bc2_38_bc3_25	21	2935
	1214-7_bc1_14_bc2_48_bc3_80	35	44	1214-8_bc1_12_bc2_39_bc3_48	3	4
	1214-7_bc1_14_bc2_48_bc3_94	6	8	1214-8_bc1_12_bc2_39_bc3_56	26	27
	1214-7_bc1_14_bc2_5_bc3_11	1	1	1214-8_bc1_12_bc2_40_bc3_12	4	28
	1214-7_bc1_14_bc2_50_bc3_92	71	74	1214-8_bc1_12_bc2_40_bc3_32	25	28
	1214-7_bc1_14_bc2_52_bc3_23	3	12	1214-8_bc1_12_bc2_40_bc3_38	76	2133
	1214-7_bc1_14_bc2_52_bc3_40	34	44	1214-8_bc1_12_bc2_41_bc3_1	1	15
	1214-7_bc1_14_bc2_52_bc3_67	9	9	1214-8_bc1_12_bc2_44_bc3_65	3	4
	1214-7_bc1_14_bc2_52_bc3_90	2	5	1214-8_bc1_12_bc2_45_bc3_82	2	2
	1214-7_bc1_14_bc2_53_bc3_65	2	12	1214-8_bc1_12_bc2_46_bc3_88	43	2882
	1214-7_bc1_14_bc2_56_bc3_12	1	1	1214-8_bc1_12_bc2_47_bc3_24	14	16
	1214-7_bc1_14_bc2_56_bc3_16	22	24	1214-8_bc1_12_bc2_47_bc3_37	17	18
	1214-7_bc1_14_bc2_57_bc3_67	5	35	1214-8_bc1_12_bc2_47_bc3_66	94	173
	1214-7_bc1_14_bc2_57_bc3_75	20	23	1214-8_bc1_12_bc2_48_bc3_16	114	2334
	1214-7_bc1_14_bc2_6_bc3_13	29	34	1214-8_bc1_12_bc2_48_bc3_24	4	20
	1214-7_bc1_14_bc2_6_bc3_83	327	13052	1214-8_bc1_12_bc2_48_bc3_38	4	5
	1214-7_bc1_14_bc2_61_bc3_37	1	1	1214-8_bc1_12_bc2_48_bc3_69	65	74
	1214-7_bc1_14_bc2_61_bc3_79	5	27	1214-8_bc1_12_bc2_49_bc3_21	16	16
	1214-7_bc1_14_bc2_62_bc3_72	172	13668	1214-8_bc1_12_bc2_50_bc3_46	1	1
	1214-7_bc1_14_bc2_62_bc3_78	28	34	1214-8_bc1_12_bc2_50_bc3_58	7	14
	1214-7_bc1_14_bc2_63_bc3_13	210	8000	1214-8_bc1_12_bc2_50_bc3_7	20	22
	1214-7_bc1_14_bc2_63_bc3_20	182	235	1214-8_bc1_12_bc2_50_bc3_85	48	1457
	1214-7_bc1_14_bc2_63_bc3_26	2	2	1214-8_bc1_12_bc2_51_bc3_12	19	67
	1214-7_bc1_14_bc2_63_bc3_68	5	13	1214-8_bc1_12_bc2_51_bc3_25	22	66
	1214-7_bc1_14_bc2_63_bc3_77	1	1	1214-8_bc1_12_bc2_51_bc3_29	4	9
	1214-7_bc1_14_bc2_63_bc3_85	20	23	1214-8_bc1_12_bc2_52_bc3_32	1	1
	1214-7_bc1_14_bc2_63_bc3_87	1	1	1214-8_bc1_12_bc2_52_bc3_4	345	603
	1214-7_bc1_14_bc2_64_bc3_15	1	1	1214-8_bc1_12_bc2_52_bc3_42	1	1
	1214-7_bc1_14_bc2_64_bc3_57	2	10	1214-8_bc1_12_bc2_52_bc3_55	1	1
	1214-7_bc1_14_bc2_65_bc3_16	20	25	1214-8_bc1_12_bc2_52_bc3_59	68	80
	1214-7_bc1_14_bc2_65_bc3_40	7	12	1214-8_bc1_12_bc2_52_bc3_60	41	1839
	1214-7_bc1_14_bc2_65_bc3_73	2	14	1214-8_bc1_12_bc2_52_bc3_61	1	1
	1214-7_bc1_14_bc2_66_bc3_25	9	14	1214-8_bc1_12_bc2_52_bc3_7	9	9
	1214-7_bc1_14_bc2_66_bc3_59	3	4	1214-8_bc1_12_bc2_53_bc3_38	14	14
	1214-7_bc1_14_bc2_66_bc3_73	16	90	1214-8_bc1_12_bc2_53_bc3_47	68	2861
	1214-7_bc1_14_bc2_66_bc3_74	24	27	1214-8_bc1_12_bc2_53_bc3_75	1	1
	1214-7_bc1_14_bc2_67_bc3_43	4	16	1214-8_bc1_12_bc2_53_bc3_93	3	10
	1214-7_bc1_14_bc2_67_bc3_82	1	10	1214-8_bc1_12_bc2_54_bc3_77	2	2
	1214-7_bc1_14_bc2_67_bc3_88	3	4	1214-8_bc1_12_bc2_54_bc3_93	9	10
	1214-7_bc1_14_bc2_68_bc3_26	106	120	1214-8_bc1_12_bc2_55_bc3_47	16	2811
	1214-7_bc1_14_bc2_69_bc3_84	1	1	1214-8_bc1_12_bc2_58_bc3_61	1	6
	1214-7_bc1_14_bc2_71_bc3_16	30	32	1214-8_bc1_12_bc2_58_bc3_93	49	5149
	1214-7_bc1_14_bc2_71_bc3_23	196	4414	1214-8_bc1_12_bc2_6_bc3_25	37	42
	1214-7_bc1_14_bc2_71_bc3_37	18	19	1214-8_bc1_12_bc2_6_bc3_87	17	18
	1214-7_bc1_14_bc2_71_bc3_4	4	4	1214-8_bc1_12_bc2_60_bc3_85	6	6
	1214-7_bc1_14_bc2_73_bc3_20	24	28	1214-8_bc1_12_bc2_61_bc3_73	1	1
	1214-7_bc1_14_bc2_73_bc3_23	3	29	1214-8_bc1_12_bc2_61_bc3_93	120	5464
	1214-7_bc1_14_bc2_73_bc3_53	1	1	1214-8_bc1_12_bc2_62_bc3_78	1	5
	1214-7_bc1_14_bc2_73_bc3_77	3	12	1214-8_bc1_12_bc2_63_bc3_28	6	20
	1214-7_bc1_14_bc2_74_bc3_12	21	26	1214-8_bc1_12_bc2_63_bc3_36	4	4
	1214-7_bc1_14_bc2_74_bc3_27	3	10	1214-8_bc1_12_bc2_63_bc3_4	109	2579
	1214-7_bc1_14_bc2_74_bc3_34	2	12	1214-8_bc1_12_bc2_63_bc3_5	406	19958
	1214-7_bc1_14_bc2_74_bc3_40	12	4985	1214-8_bc1_12_bc2_63_bc3_52	1	1
	1214-7_bc1_14_bc2_74_bc3_59	7	7	1214-8_bc1_12_bc2_63_bc3_57	3	3
	1214-7_bc1_14_bc2_74_bc3_95	13	25	1214-8_bc1_12_bc2_63_bc3_70	5	43
	1214-7_bc1_14_bc2_75_bc3_67	25	26	1214-8_bc1_12_bc2_63_bc3_73	34	38
	1214-7_bc1_14_bc2_75_bc3_72	19	31	1214-8_bc1_12_bc2_63_bc3_96	3	3
	1214-7_bc1_14_bc2_75_bc3_75	1	1	1214-8_bc1_12_bc2_64_bc3_67	9	11
	1214-7_bc1_14_bc2_75_bc3_80	1	7	1214-8_bc1_12_bc2_65_bc3_14	14	16
	1214-7_bc1_14_bc2_76_bc3_29	12	63	1214-8_bc1_12_bc2_65_bc3_16	1	3
	1214-7_bc1_14_bc2_77_bc3_22	1	1	1214-8_bc1_12_bc2_65_bc3_25	3	4
	1214-7_bc1_14_bc2_77_bc3_55	287	1865	1214-8_bc1_12_bc2_65_bc3_34	1	2
	1214-7_bc1_14_bc2_77_bc3_72	2	2	1214-8_bc1_12_bc2_65_bc3_40	528	6737
	1214-7_bc1_14_bc2_8_bc3_20	2	2	1214-8_bc1_12_bc2_65_bc3_45	3	5
	1214-7_bc1_14_bc2_80_bc3_16	246	10446	1214-8_bc1_12_bc2_65_bc3_47	1	1
	1214-7_bc1_14_bc2_80_bc3_35	3	9	1214-8_bc1_12_bc2_65_bc3_68	3	4
	1214-7_bc1_14_bc2_80_bc3_86	2	2	1214-8_bc1_12_bc2_65_bc3_72	4	23
	1214-7_bc1_14_bc2_81_bc3_92	4	19	1214-8_bc1_12_bc2_65_bc3_73	3	6
	1214-7_bc1_14_bc2_82_bc3_3	15	26	1214-8_bc1_12_bc2_65_bc3_76	138	8614
	1214-7_bc1_14_bc2_82_bc3_63	15	17	1214-8_bc1_12_bc2_66_bc3_48	4	7
	1214-7_bc1_14_bc2_83_bc3_52	2	2	1214-8_bc1_12_bc2_66_bc3_73	34	92
	1214-7_bc1_14_bc2_84_bc3_32	9	41	1214-8_bc1_12_bc2_66_bc3_82	8	10
	1214-7_bc1_14_bc2_84_bc3_74	3	6	1214-8_bc1_12_bc2_66_bc3_84	102	7045
	1214-7_bc1_14_bc2_85_bc3_29	3	4	1214-8_bc1_12_bc2_67_bc3_13	13	13
	1214-7_bc1_14_bc2_85_bc3_88	19	21	1214-8_bc1_12_bc2_67_bc3_23	1	1
	1214-7_bc1_14_bc2_86_bc3_1	4	4	1214-8_bc1_12_bc2_67_bc3_46	14	16
	1214-7_bc1_14_bc2_86_bc3_12	1	1	1214-8_bc1_12_bc2_67_bc3_96	486	36533
	1214-7_bc1_14_bc2_86_bc3_15	480	694	1214-8_bc1_12_bc2_68_bc3_63	17	27
	1214-7_bc1_14_bc2_86_bc3_16	2	2	1214-8_bc1_12_bc2_69_bc3_36	2	6
	1214-7_bc1_14_bc2_86_bc3_20	1	1	1214-8_bc1_12_bc2_7_bc3_44	34	1347
	1214-7_bc1_14_bc2_86_bc3_5	1	1	1214-8_bc1_12_bc2_7_bc3_79	15	15
	1214-7_bc1_14_bc2_86_bc3_52	2	3	1214-8_bc1_12_bc2_71_bc3_16	14	15
	1214-7_bc1_14_bc2_86_bc3_73	1	1	1214-8_bc1_12_bc2_71_bc3_9	74	3792
	1214-7_bc1_14_bc2_87_bc3_14	248	15437	1214-8_bc1_12_bc2_72_bc3_89	24	25
	1214-7_bc1_14_bc2_87_bc3_50	1	6	1214-8_bc1_12_bc2_73_bc3_85	15	17
	1214-7_bc1_14_bc2_88_bc3_15	6	7	1214-8_bc1_12_bc2_74_bc3_10	123	9648
	1214-7_bc1_14_bc2_88_bc3_39	5	14	1214-8_bc1_12_bc2_74_bc3_22	4	4
	1214-7_bc1_14_bc2_88_bc3_42	1	3	1214-8_bc1_12_bc2_74_bc3_4	6	11
	1214-7_bc1_14_bc2_88_bc3_59	395	15944	1214-8_bc1_12_bc2_74_bc3_53	126	12098
	1214-7_bc1_14_bc2_88_bc3_84	1	1	1214-8_bc1_12_bc2_74_bc3_60	13	13
	1214-7_bc1_14_bc2_89_bc3_73	7	8	1214-8_bc1_12_bc2_74_bc3_71	8	8
	1214-7_bc1_14_bc2_9_bc3_33	4	4	1214-8_bc1_12_bc2_74_bc3_73	2	2
	1214-7_bc1_14_bc2_90_bc3_28	6	6	1214-8_bc1_12_bc2_74_bc3_75	5	6
	1214-7_bc1_14_bc2_90_bc3_33	2	2	1214-8_bc1_12_bc2_74_bc3_82	107	7065
	1214-7_bc1_14_bc2_90_bc3_35	4	4	1214-8_bc1_12_bc2_74_bc3_92	4	7
	1214-7_bc1_14_bc2_90_bc3_42	147	15455	1214-8_bc1_12_bc2_74_bc3_96	16	94
	1214-7_bc1_14_bc2_90_bc3_57	3	4	1214-8_bc1_12_bc2_75_bc3_14	4	4
	1214-7_bc1_14_bc2_90_bc3_60	3	3	1214-8_bc1_12_bc2_75_bc3_16	1	1
	1214-7_bc1_14_bc2_90_bc3_75	27	31	1214-8_bc1_12_bc2_75_bc3_25	3	4
	1214-7_bc1_14_bc2_90_bc3_8	2	8	1214-8_bc1_12_bc2_75_bc3_28	1	1
	1214-7_bc1_14_bc2_90_bc3_90	458	18824	1214-8_bc1_12_bc2_75_bc3_32	5	6
	1214-7_bc1_14_bc2_91_bc3_78	2	2	1214-8_bc1_12_bc2_75_bc3_35	307	14306
	1214-7_bc1_14_bc2_92_bc3_61	35	42	1214-8_bc1_12_bc2_75_bc3_37	3	5
	1214-7_bc1_14_bc2_93_bc3_13	1	1	1214-8_bc1_12_bc2_75_bc3_43	2	2
	1214-7_bc1_14_bc2_93_bc3_20	11	12	1214-8_bc1_12_bc2_75_bc3_46	13	16
	1214-7_bc1_14_bc2_93_bc3_79	9	12	1214-8_bc1_12_bc2_75_bc3_55	345	12590
	1214-7_bc1_14_bc2_95_bc3_1	4	6	1214-8_bc1_12_bc2_75_bc3_65	7	7
	1214-7_bc1_14_bc2_95_bc3_14	4	5	1214-8_bc1_12_bc2_75_bc3_67	81	87
	1214-7_bc1_14_bc2_95_bc3_16	1	2	1214-8_bc1_12_bc2_75_bc3_68	1	1
	1214-7_bc1_14_bc2_95_bc3_28	7	8	1214-8_bc1_12_bc2_75_bc3_70	2	2
	1214-7_bc1_14_bc2_95_bc3_31	1	1	1214-8_bc1_12_bc2_75_bc3_71	4	4
	1214-7_bc1_14_bc2_95_bc3_33	4	4	1214-8_bc1_12_bc2_75_bc3_75	1	1
	1214-7_bc1_14_bc2_95_bc3_52	2	2	1214-8_bc1_12_bc2_75_bc3_85	3	3
	1214-7_bc1_14_bc2_95_bc3_59	557	25924	1214-8_bc1_12_bc2_75_bc3_86	1	1
	1214-7_bc1_14_bc2_95_bc3_67	4	5	1214-8_bc1_12_bc2_75_bc3_89	1	1
	1214-7_bc1_14_bc2_95_bc3_72	2	2	1214-8_bc1_12_bc2_75_bc3_96	1	2
	1214-7_bc1_14_bc2_95_bc3_84	3	3	1214-8_bc1_12_bc2_76_bc3_11	3	3
	1214-7_bc1_15_bc2_11_bc3_10	151	183	1214-8_bc1_12_bc2_76_bc3_14	2	2
	1214-7_bc1_15_bc2_12_bc3_3	18	23	1214-8_bc1_12_bc2_76_bc3_25	3	5
	1214-7_bc1_15_bc2_12_bc3_95	11	14	1214-8_bc1_12_bc2_76_bc3_36	4	5
	1214-7_bc1_15_bc2_13_bc3_54	1	6	1214-8_bc1_12_bc2_76_bc3_48	3	4
	1214-7_bc1_15_bc2_14_bc3_14	3	3	1214-8_bc1_12_bc2_76_bc3_6	3	3
	1214-7_bc1_15_bc2_14_bc3_21	4	12	1214-8_bc1_12_bc2_76_bc3_65	11	12
	1214-7_bc1_15_bc2_14_bc3_25	3	3	1214-8_bc1_12_bc2_76_bc3_67	690	54759
	1214-7_bc1_15_bc2_14_bc3_32	422	32407	1214-8_bc1_12_bc2_76_bc3_7	2	2
	1214-7_bc1_15_bc2_14_bc3_40	2	2	1214-8_bc1_12_bc2_77_bc3_11	1	1
	1214-7_bc1_15_bc2_14_bc3_5	230	272	1214-8_bc1_12_bc2_77_bc3_16	20	40
	1214-7_bc1_15_bc2_14_bc3_66	2	2	1214-8_bc1_12_bc2_77_bc3_2	2	2
	1214-7_bc1_15_bc2_14_bc3_67	1	1	1214-8_bc1_12_bc2_77_bc3_30	1	1
	1214-7_bc1_15_bc2_14_bc3_69	3	3	1214-8_bc1_12_bc2_77_bc3_45	4	4
	1214-7_bc1_15_bc2_14_bc3_73	1	1	1214-8_bc1_12_bc2_77_bc3_65	1	3
	1214-7_bc1_15_bc2_15_bc3_13	1	1	1214-8_bc1_12_bc2_77_bc3_69	81	97
	1214-7_bc1_15_bc2_15_bc3_16	2	2	1214-8_bc1_12_bc2_77_bc3_93	3	4
	1214-7_bc1_15_bc2_15_bc3_20	2	2	1214-8_bc1_12_bc2_78_bc3_34	51	2164
	1214-7_bc1_15_bc2_15_bc3_43	2	4	1214-8_bc1_12_bc2_78_bc3_63	5	17
	1214-7_bc1_15_bc2_15_bc3_52	9	34	1214-8_bc1_12_bc2_79_bc3_65	14	15
	1214-7_bc1_15_bc2_15_bc3_55	3	22	1214-8_bc1_12_bc2_8_bc3_57	2	4
	1214-7_bc1_15_bc2_15_bc3_59	3	4	1214-8_bc1_12_bc2_8_bc3_92	2	4
	1214-7_bc1_15_bc2_15_bc3_70	276	1259	1214-8_bc1_12_bc2_80_bc3_16	2	2
	1214-7_bc1_15_bc2_15_bc3_8	3	4	1214-8_bc1_12_bc2_81_bc3_24	83	96
	1214-7_bc1_15_bc2_15_bc3_92	137	171	1214-8_bc1_12_bc2_82_bc3_26	24	28
	1214-7_bc1_15_bc2_15_bc3_96	3	5	1214-8_bc1_12_bc2_82_bc3_4	2	2
	1214-7_bc1_15_bc2_16_bc3_47	5	27	1214-8_bc1_12_bc2_82_bc3_40	1	1
	1214-7_bc1_15_bc2_17_bc3_69	52	292	1214-8_bc1_12_bc2_82_bc3_47	93	982
	1214-7_bc1_15_bc2_18_bc3_1	2	2	1214-8_bc1_12_bc2_82_bc3_59	91	99
	1214-7_bc1_15_bc2_18_bc3_19	2	3	1214-8_bc1_12_bc2_83_bc3_32	9	12
	1214-7_bc1_15_bc2_18_bc3_20	1	1	1214-8_bc1_12_bc2_83_bc3_44	72	141
	1214-7_bc1_15_bc2_18_bc3_30	3	12	1214-8_bc1_12_bc2_83_bc3_5	1	1
	1214-7_bc1_15_bc2_18_bc3_35	1	1	1214-8_bc1_12_bc2_84_bc3_68	2	2
	1214-7_bc1_15_bc2_18_bc3_67	1	1	1214-8_bc1_12_bc2_84_bc3_81	1	1
	1214-7_bc1_15_bc2_18_bc3_7	427	12119	1214-8_bc1_12_bc2_85_bc3_31	13	13
	1214-7_bc1_15_bc2_18_bc3_72	2	2	1214-8_bc1_12_bc2_85_bc3_34	1	1
	1214-7_bc1_15_bc2_18_bc3_73	1	1	1214-8_bc1_12_bc2_85_bc3_35	2	3
	1214-7_bc1_15_bc2_18_bc3_76	2	4	1214-8_bc1_12_bc2_85_bc3_37	520	8399
	1214-7_bc1_15_bc2_18_bc3_77	2	2	1214-8_bc1_12_bc2_85_bc3_51	1	1
	1214-7_bc1_15_bc2_18_bc3_88	246	4572	1214-8_bc1_12_bc2_85_bc3_59	1	1
	1214-7_bc1_15_bc2_18_bc3_90	1	1	1214-8_bc1_12_bc2_85_bc3_64	343	392
	1214-7_bc1_15_bc2_18_bc3_94	2	2	1214-8_bc1_12_bc2_85_bc3_93	1	1
	1214-7_bc1_15_bc2_19_bc3_93	31	34	1214-8_bc1_12_bc2_85_bc3_95	1	1
	1214-7_bc1_15_bc2_2_bc3_92	65	75	1214-8_bc1_12_bc2_86_bc3_93	62	1660
	1214-7_bc1_15_bc2_21_bc3_83	1	1	1214-8_bc1_12_bc2_87_bc3_38	87	100
	1214-7_bc1_15_bc2_22_bc3_53	2	2	1214-8_bc1_12_bc2_87_bc3_68	3	3
	1214-7_bc1_15_bc2_22_bc3_90	29	49	1214-8_bc1_12_bc2_87_bc3_75	17	2560
	1214-7_bc1_15_bc2_23_bc3_14	1	1	1214-8_bc1_12_bc2_87_bc3_8	5	11
	1214-7_bc1_15_bc2_23_bc3_16	3	3	1214-8_bc1_12_bc2_88_bc3_3	8	11
	1214-7_bc1_15_bc2_23_bc3_25	1	3	1214-8_bc1_12_bc2_88_bc3_30	5	6
	1214-7_bc1_15_bc2_23_bc3_26	824	35026	1214-8_bc1_12_bc2_88_bc3_6	107	4684
	1214-7_bc1_15_bc2_23_bc3_28	18	23	1214-8_bc1_12_bc2_89_bc3_8	3	6
	1214-7_bc1_15_bc2_23_bc3_3	28	28	1214-8_bc1_12_bc2_89_bc3_87	8	27
	1214-7_bc1_15_bc2_23_bc3_32	1	1	1214-8_bc1_12_bc2_89_bc3_92	57	7222
	1214-7_bc1_15_bc2_23_bc3_35	2	2	1214-8_bc1_12_bc2_9_bc3_51	4	18
	1214-7_bc1_15_bc2_23_bc3_44	1	1	1214-8_bc1_12_bc2_9_bc3_64	323	25172
	1214-7_bc1_15_bc2_23_bc3_52	4	5	1214-8_bc1_12_bc2_90_bc3_48	424	24577
	1214-7_bc1_15_bc2_23_bc3_59	1	1	1214-8_bc1_12_bc2_90_bc3_55	50	3466
	1214-7_bc1_15_bc2_23_bc3_70	2	3	1214-8_bc1_12_bc2_90_bc3_57	4	7
	1214-7_bc1_15_bc2_23_bc3_72	1	1	1214-8_bc1_12_bc2_91_bc3_2	28	29
	1214-7_bc1_15_bc2_23_bc3_76	87	101	1214-8_bc1_12_bc2_91_bc3_49	302	28516
	1214-7_bc1_15_bc2_23_bc3_78	1	1	1214-8_bc1_12_bc2_92_bc3_40	2	8
	1214-7_bc1_15_bc2_23_bc3_84	1	1	1214-8_bc1_12_bc2_92_bc3_89	3	8
	1214-7_bc1_15_bc2_23_bc3_85	1	1	1214-8_bc1_12_bc2_93_bc3_55	368	5182
	1214-7_bc1_15_bc2_23_bc3_86	1	1	1214-8_bc1_12_bc2_93_bc3_88	14	38
	1214-7_bc1_15_bc2_23_bc3_90	1	1	1214-8_bc1_12_bc2_94_bc3_33	5	16
	1214-7_bc1_15_bc2_23_bc3_96	2	2	1214-8_bc1_12_bc2_95_bc3_14	116	3011
	1214-7_bc1_15_bc2_24_bc3_26	22	26	1214-8_bc1_12_bc2_95_bc3_21	20	20
	1214-7_bc1_15_bc2_24_bc3_3	482	7976	1214-8_bc1_12_bc2_95_bc3_30	21	242
	1214-7_bc1_15_bc2_24_bc3_57	13	15	1214-8_bc1_12_bc2_95_bc3_54	2	2
	1214-7_bc1_15_bc2_24_bc3_84	2	2	1214-8_bc1_12_bc2_95_bc3_93	2	2
	1214-7_bc1_15_bc2_26_bc3_57	33	36	1214-8_bc1_12_bc2_96_bc3_49	8	1841
	1214-7_bc1_15_bc2_26_bc3_96	1	1	1214-8_bc1_12_bc2_96_bc3_85	8	8
	1214-7_bc1_15_bc2_28_bc3_32	7	8	1214-8_bc1_13_bc2_10_bc3_57	14	2897
	1214-7_bc1_15_bc2_3_bc3_61	1	6	1214-8_bc1_13_bc2_11_bc3_26	8	10
	1214-7_bc1_15_bc2_30_bc3_72	145	166	1214-8_bc1_13_bc2_11_bc3_43	47	7038
	1214-7_bc1_15_bc2_30_bc3_91	22	31	1214-8_bc1_13_bc2_11_bc3_63	5	6
	1214-7_bc1_15_bc2_32_bc3_96	2	6	1214-8_bc1_13_bc2_12_bc3_26	15	16
	1214-7_bc1_15_bc2_33_bc3_34	2	5	1214-8_bc1_13_bc2_12_bc3_35	6	24
	1214-7_bc1_15_bc2_33_bc3_39	1	1	1214-8_bc1_13_bc2_12_bc3_76	2	2
	1214-7_bc1_15_bc2_33_bc3_59	26	4408	1214-8_bc1_13_bc2_12_bc3_91	401	14651
	1214-7_bc1_15_bc2_33_bc3_67	39	43	1214-8_bc1_13_bc2_13_bc3_50	12	13
	1214-7_bc1_15_bc2_33_bc3_81	373	509	1214-8_bc1_13_bc2_13_bc3_66	2	2
	1214-7_bc1_15_bc2_34_bc3_4	3	6	1214-8_bc1_13_bc2_13_bc3_67	37	2796
	1214-7_bc1_15_bc2_34_bc3_48	2	2	1214-8_bc1_13_bc2_13_bc3_78	1	6
	1214-7_bc1_15_bc2_34_bc3_73	6	10	1214-8_bc1_13_bc2_13_bc3_92	11	119
	1214-7_bc1_15_bc2_37_bc3_13	23	25	1214-8_bc1_13_bc2_14_bc3_26	6	10
	1214-7_bc1_15_bc2_37_bc3_16	3	3	1214-8_bc1_13_bc2_14_bc3_39	77	14171
	1214-7_bc1_15_bc2_37_bc3_38	76	2710	1214-8_bc1_13_bc2_14_bc3_6	5	21
	1214-7_bc1_15_bc2_37_bc3_59	616	32627	1214-8_bc1_13_bc2_14_bc3_72	5	5
	1214-7_bc1_15_bc2_37_bc3_71	2	6	1214-8_bc1_13_bc2_16_bc3_34	4	5
	1214-7_bc1_15_bc2_37_bc3_87	4	27	1214-8_bc1_13_bc2_16_bc3_46	11	12
	1214-7_bc1_15_bc2_37_bc3_94	3	3	1214-8_bc1_13_bc2_16_bc3_66	3	7
	1214-7_bc1_15_bc2_39_bc3_28	14	20	1214-8_bc1_13_bc2_17_bc3_48	16	3492
	1214-7_bc1_15_bc2_4_bc3_40	3	3	1214-8_bc1_13_bc2_17_bc3_73	22	28
	1214-7_bc1_15_bc2_40_bc3_66	14	14	1214-8_bc1_13_bc2_17_bc3_91	139	9980
	1214-7_bc1_15_bc2_40_bc3_76	1	1	1214-8_bc1_13_bc2_19_bc3_12	9	10
	1214-7_bc1_15_bc2_40_bc3_88	217	267	1214-8_bc1_13_bc2_19_bc3_26	13	17
	1214-7_bc1_15_bc2_43_bc3_2	1	1	1214-8_bc1_13_bc2_19_bc3_29	4	5
	1214-7_bc1_15_bc2_43_bc3_4	271	12808	1214-8_bc1_13_bc2_2_bc3_63	87	1965
	1214-7_bc1_15_bc2_44_bc3_20	2	4	1214-8_bc1_13_bc2_2_bc3_75	7	7
	1214-7_bc1_15_bc2_44_bc3_25	1	2	1214-8_bc1_13_bc2_2_bc3_89	4	4
	1214-7_bc1_15_bc2_46_bc3_24	52	3716	1214-8_bc1_13_bc2_20_bc3_58	2	3
	1214-7_bc1_15_bc2_48_bc3_12	7	45	1214-8_bc1_13_bc2_20_bc3_65	6	8
	1214-7_bc1_15_bc2_48_bc3_16	5	22	1214-8_bc1_13_bc2_22_bc3_58	19	22
	1214-7_bc1_15_bc2_48_bc3_61	19	20	1214-8_bc1_13_bc2_22_bc3_78	271	1676
	1214-7_bc1_15_bc2_50_bc3_14	24	28	1214-8_bc1_13_bc2_24_bc3_80	10	12
	1214-7_bc1_15_bc2_50_bc3_79	2	2	1214-8_bc1_13_bc2_25_bc3_77	4	9
	1214-7_bc1_15_bc2_51_bc3_9	2	8	1214-8_bc1_13_bc2_26_bc3_29	6	6
	1214-7_bc1_15_bc2_52_bc3_13	1	3	1214-8_bc1_13_bc2_26_bc3_3	13	14
	1214-7_bc1_15_bc2_52_bc3_35	22	28	1214-8_bc1_13_bc2_26_bc3_5	460	13592
	1214-7_bc1_15_bc2_53_bc3_11	2	12	1214-8_bc1_13_bc2_26_bc3_59	8	20
	1214-7_bc1_15_bc2_53_bc3_20	4	5	1214-8_bc1_13_bc2_27_bc3_26	4	5
	1214-7_bc1_15_bc2_53_bc3_55	21	30	1214-8_bc1_13_bc2_27_bc3_57	87	1649
	1214-7_bc1_15_bc2_53_bc3_57	21	22	1214-8_bc1_13_bc2_27_bc3_88	2	7
	1214-7_bc1_15_bc2_53_bc3_80	4	4	1214-8_bc1_13_bc2_28_bc3_14	1	5
	1214-7_bc1_15_bc2_54_bc3_39	3	3	1214-8_bc1_13_bc2_28_bc3_42	4	4
	1214-7_bc1_15_bc2_54_bc3_5	88	4889	1214-8_bc1_13_bc2_28_bc3_51	9	20
	1214-7_bc1_15_bc2_54_bc3_80	16	18	1214-8_bc1_13_bc2_28_bc3_67	84	119
	1214-7_bc1_15_bc2_54_bc3_82	16	17	1214-8_bc1_13_bc2_29_bc3_86	4	1855
	1214-7_bc1_15_bc2_56_bc3_12	1	1	1214-8_bc1_13_bc2_30_bc3_42	2	2
	1214-7_bc1_15_bc2_56_bc3_4	2	4	1214-8_bc1_13_bc2_31_bc3_15	350	21876
	1214-7_bc1_15_bc2_57_bc3_31	2	39	1214-8_bc1_13_bc2_31_bc3_48	44	3072
	1214-7_bc1_15_bc2_57_bc3_34	1	14	1214-8_bc1_13_bc2_31_bc3_59	2	2
	1214-7_bc1_15_bc2_57_bc3_4	4	12	1214-8_bc1_13_bc2_32_bc3_26	5	5
	1214-7_bc1_15_bc2_57_bc3_91	3	109	1214-8_bc1_13_bc2_32_bc3_35	67	2712
	1214-7_bc1_15_bc2_58_bc3_24	27	36	1214-8_bc1_13_bc2_32_bc3_36	2	3
	1214-7_bc1_15_bc2_58_bc3_95	2	2	1214-8_bc1_13_bc2_32_bc3_51	1	1
	1214-7_bc1_15_bc2_6_bc3_30	26	27	1214-8_bc1_13_bc2_32_bc3_70	385	10486
	1214-7_bc1_15_bc2_6_bc3_59	7	16	1214-8_bc1_13_bc2_32_bc3_77	4	14
	1214-7_bc1_15_bc2_63_bc3_12	1	7	1214-8_bc1_13_bc2_32_bc3_80	2	2
	1214-7_bc1_15_bc2_63_bc3_57	1	1	1214-8_bc1_13_bc2_32_bc3_96	1	1
	1214-7_bc1_15_bc2_64_bc3_84	8	50	1214-8_bc1_13_bc2_33_bc3_2	19	22
	1214-7_bc1_15_bc2_65_bc3_16	24	26	1214-8_bc1_13_bc2_34_bc3_54	3	3
	1214-7_bc1_15_bc2_65_bc3_68	2	2	1214-8_bc1_13_bc2_34_bc3_63	2	2
	1214-7_bc1_15_bc2_66_bc3_18	6	41	1214-8_bc1_13_bc2_34_bc3_73	5	5
	1214-7_bc1_15_bc2_66_bc3_28	4	4	1214-8_bc1_13_bc2_34_bc3_78	361	21948
	1214-7_bc1_15_bc2_66_bc3_33	19	20	1214-8_bc1_13_bc2_35_bc3_1	6	6
	1214-7_bc1_15_bc2_66_bc3_73	2	2	1214-8_bc1_13_bc2_35_bc3_11	5	5
	1214-7_bc1_15_bc2_66_bc3_79	11	64	1214-8_bc1_13_bc2_35_bc3_12	9	9
	1214-7_bc1_15_bc2_66_bc3_84	3	5	1214-8_bc1_13_bc2_35_bc3_13	8	9
	1214-7_bc1_15_bc2_67_bc3_35	6	37	1214-8_bc1_13_bc2_35_bc3_14	4	4
	1214-7_bc1_15_bc2_67_bc3_77	141	165	1214-8_bc1_13_bc2_35_bc3_15	1	1
	1214-7_bc1_15_bc2_67_bc3_91	17	22	1214-8_bc1_13_bc2_35_bc3_16	6	8
	1214-7_bc1_15_bc2_67_bc3_93	58	3586	1214-8_bc1_13_bc2_35_bc3_18	3	4
	1214-7_bc1_15_bc2_69_bc3_10	1	18	1214-8_bc1_13_bc2_35_bc3_19	2	2
	1214-7_bc1_15_bc2_69_bc3_28	4	6	1214-8_bc1_13_bc2_35_bc3_2	4	5
	1214-7_bc1_15_bc2_69_bc3_50	2	2	1214-8_bc1_13_bc2_35_bc3_20	1	1
	1214-7_bc1_15_bc2_69_bc3_57	3	3	1214-8_bc1_13_bc2_35_bc3_21	3	3
	1214-7_bc1_15_bc2_69_bc3_72	4	5	1214-8_bc1_13_bc2_35_bc3_22	2	3
	1214-7_bc1_15_bc2_69_bc3_84	791	41976	1214-8_bc1_13_bc2_35_bc3_23	4	4
	1214-7_bc1_15_bc2_69_bc3_85	1	1	1214-8_bc1_13_bc2_35_bc3_24	3	3
	1214-7_bc1_15_bc2_69_bc3_89	3	3	1214-8_bc1_13_bc2_35_bc3_25	5	5
	1214-7_bc1_15_bc2_7_bc3_46	2	2	1214-8_bc1_13_bc2_35_bc3_26	3775	182930
	1214-7_bc1_15_bc2_72_bc3_6	74	83	1214-8_bc1_13_bc2_35_bc3_27	5	6
	1214-7_bc1_15_bc2_73_bc3_73	6	7	1214-8_bc1_13_bc2_35_bc3_28	3	3
	1214-7_bc1_15_bc2_74_bc3_12	3	3	1214-8_bc1_13_bc2_35_bc3_29	21	25
	1214-7_bc1_15_bc2_74_bc3_25	556	25152	1214-8_bc1_13_bc2_35_bc3_3	14	17
	1214-7_bc1_15_bc2_74_bc3_70	4	5	1214-8_bc1_13_bc2_35_bc3_30	8	11
	1214-7_bc1_15_bc2_74_bc3_95	2	2	1214-8_bc1_13_bc2_35_bc3_31	7	8
	1214-7_bc1_15_bc2_75_bc3_75	2	2	1214-8_bc1_13_bc2_35_bc3_32	2	2
	1214-7_bc1_15_bc2_75_bc3_90	20	23	1214-8_bc1_13_bc2_35_bc3_33	2	3
	1214-7_bc1_15_bc2_76_bc3_27	15	17	1214-8_bc1_13_bc2_35_bc3_34	8	8
	1214-7_bc1_15_bc2_76_bc3_41	1	1	1214-8_bc1_13_bc2_35_bc3_35	7	9
	1214-7_bc1_15_bc2_76_bc3_74	2	3	1214-8_bc1_13_bc2_35_bc3_36	15	15
	1214-7_bc1_15_bc2_76_bc3_76	6	39	1214-8_bc1_13_bc2_35_bc3_37	2	2
	1214-7_bc1_15_bc2_76_bc3_80	59	70	1214-8_bc1_13_bc2_35_bc3_38	4	6
	1214-7_bc1_15_bc2_77_bc3_8	9	45	1214-8_bc1_13_bc2_35_bc3_39	2	2
	1214-7_bc1_15_bc2_77_bc3_95	15	18	1214-8_bc1_13_bc2_35_bc3_4	4	4
	1214-7_bc1_15_bc2_79_bc3_26	21	24	1214-8_bc1_13_bc2_35_bc3_40	12	12
	1214-7_bc1_15_bc2_8_bc3_46	10	11	1214-8_bc1_13_bc2_35_bc3_41	4	4
	1214-7_bc1_15_bc2_8_bc3_69	28	2232	1214-8_bc1_13_bc2_35_bc3_42	9	10
	1214-7_bc1_15_bc2_80_bc3_16	48	54	1214-8_bc1_13_bc2_35_bc3_43	8	9
	1214-7_bc1_15_bc2_81_bc3_94	4	6	1214-8_bc1_13_bc2_35_bc3_44	13	19
	1214-7_bc1_15_bc2_82_bc3_13	2	2	1214-8_bc1_13_bc2_35_bc3_45	3	3
	1214-7_bc1_15_bc2_82_bc3_14	240	9047	1214-8_bc1_13_bc2_35_bc3_46	3	3
	1214-7_bc1_15_bc2_82_bc3_16	1	1	1214-8_bc1_13_bc2_35_bc3_47	8	8
	1214-7_bc1_15_bc2_82_bc3_23	1	1	1214-8_bc1_13_bc2_35_bc3_48	8	10
	1214-7_bc1_15_bc2_82_bc3_25	1	2	1214-8_bc1_13_bc2_35_bc3_5	5	7
	1214-7_bc1_15_bc2_82_bc3_52	189	826	1214-8_bc1_13_bc2_35_bc3_51	3	4
	1214-7_bc1_15_bc2_82_bc3_63	16	20	1214-8_bc1_13_bc2_35_bc3_52	4	4
	1214-7_bc1_15_bc2_82_bc3_67	3	4	1214-8_bc1_13_bc2_35_bc3_53	3	3
	1214-7_bc1_15_bc2_82_bc3_84	4	4	1214-8_bc1_13_bc2_35_bc3_54	4	4
	1214-7_bc1_15_bc2_82_bc3_91	1	1	1214-8_bc1_13_bc2_35_bc3_55	9	10
	1214-7_bc1_15_bc2_82_bc3_92	3	3	1214-8_bc1_13_bc2_35_bc3_57	7	9
	1214-7_bc1_15_bc2_82_bc3_94	354	16677	1214-8_bc1_13_bc2_35_bc3_58	7	8
	1214-7_bc1_15_bc2_83_bc3_76	72	87	1214-8_bc1_13_bc2_35_bc3_59	6	7
	1214-7_bc1_15_bc2_84_bc3_68	5	24	1214-8_bc1_13_bc2_35_bc3_6	5	5
	1214-7_bc1_15_bc2_84_bc3_95	3	3	1214-8_bc1_13_bc2_35_bc3_60	2	3
	1214-7_bc1_15_bc2_85_bc3_36	23	26	1214-8_bc1_13_bc2_35_bc3_61	6	7
	1214-7_bc1_15_bc2_85_bc3_88	4	4	1214-8_bc1_13_bc2_35_bc3_62	4	5
	1214-7_bc1_15_bc2_86_bc3_20	4	4	1214-8_bc1_13_bc2_35_bc3_63	6	6
	1214-7_bc1_15_bc2_86_bc3_46	16	17	1214-8_bc1_13_bc2_35_bc3_65	10	11
	1214-7_bc1_15_bc2_86_bc3_52	8	24	1214-8_bc1_13_bc2_35_bc3_66	10	16
	1214-7_bc1_15_bc2_87_bc3_37	99	127	1214-8_bc1_13_bc2_35_bc3_67	8	11
	1214-7_bc1_15_bc2_87_bc3_94	1	1	1214-8_bc1_13_bc2_35_bc3_68	7	7
	1214-7_bc1_15_bc2_88_bc3_36	3	19	1214-8_bc1_13_bc2_35_bc3_69	6	8
	1214-7_bc1_15_bc2_88_bc3_43	23	24	1214-8_bc1_13_bc2_35_bc3_7	2	5
	1214-7_bc1_15_bc2_88_bc3_84	8	10	1214-8_bc1_13_bc2_35_bc3_70	4	6
	1214-7_bc1_15_bc2_89_bc3_18	11	50	1214-8_bc1_13_bc2_35_bc3_71	5	5
	1214-7_bc1_15_bc2_89_bc3_4	459	1153	1214-8_bc1_13_bc2_35_bc3_72	7	8
	1214-7_bc1_15_bc2_89_bc3_82	20	21	1214-8_bc1_13_bc2_35_bc3_73	2	2
	1214-7_bc1_15_bc2_89_bc3_96	33	3754	1214-8_bc1_13_bc2_35_bc3_75	10	10
	1214-7_bc1_15_bc2_9_bc3_33	3	3	1214-8_bc1_13_bc2_35_bc3_76	4	4
	1214-7_bc1_15_bc2_90_bc3_60	4	4	1214-8_bc1_13_bc2_35_bc3_77	3	3
	1214-7_bc1_15_bc2_90_bc3_69	2	8	1214-8_bc1_13_bc2_35_bc3_78	4	4
	1214-7_bc1_15_bc2_90_bc3_72	13	16	1214-8_bc1_13_bc2_35_bc3_79	8	29
	1214-7_bc1_15_bc2_91_bc3_54	4	6	1214-8_bc1_13_bc2_35_bc3_8	9	10
	1214-7_bc1_15_bc2_92_bc3_79	155	4931	1214-8_bc1_13_bc2_35_bc3_80	8	8
	1214-7_bc1_15_bc2_93_bc3_13	421	3087	1214-8_bc1_13_bc2_35_bc3_81	4	4
	1214-7_bc1_15_bc2_93_bc3_20	3	3	1214-8_bc1_13_bc2_35_bc3_82	4	4
	1214-7_bc1_15_bc2_93_bc3_26	1	1	1214-8_bc1_13_bc2_35_bc3_83	1	1
	1214-7_bc1_15_bc2_93_bc3_27	24	26	1214-8_bc1_13_bc2_35_bc3_84	5	6
	1214-7_bc1_15_bc2_93_bc3_52	1	2	1214-8_bc1_13_bc2_35_bc3_85	4	4
	1214-7_bc1_15_bc2_93_bc3_57	2	8	1214-8_bc1_13_bc2_35_bc3_86	2	3
	1214-7_bc1_15_bc2_93_bc3_66	2	2	1214-8_bc1_13_bc2_35_bc3_87	4	4
	1214-7_bc1_15_bc2_93_bc3_79	2	2	1214-8_bc1_13_bc2_35_bc3_88	7	8
	1214-7_bc1_15_bc2_95_bc3_1	1	1	1214-8_bc1_13_bc2_35_bc3_89	8	8
	1214-7_bc1_15_bc2_95_bc3_14	5	7	1214-8_bc1_13_bc2_35_bc3_9	6	8
	1214-7_bc1_15_bc2_95_bc3_16	7	7	1214-8_bc1_13_bc2_35_bc3_90	2	2
	1214-7_bc1_15_bc2_95_bc3_28	18	21	1214-8_bc1_13_bc2_35_bc3_91	4	4
	1214-7_bc1_15_bc2_95_bc3_32	1	2	1214-8_bc1_13_bc2_35_bc3_92	1	1
	1214-7_bc1_15_bc2_95_bc3_33	3	4	1214-8_bc1_13_bc2_35_bc3_93	6	7
	1214-7_bc1_15_bc2_95_bc3_35	2	2	1214-8_bc1_13_bc2_35_bc3_94	5	8
	1214-7_bc1_15_bc2_95_bc3_41	2	12	1214-8_bc1_13_bc2_35_bc3_95	4	6
	1214-7_bc1_15_bc2_95_bc3_48	540	30103	1214-8_bc1_13_bc2_35_bc3_96	6	6
	1214-7_bc1_15_bc2_95_bc3_71	1	1	1214-8_bc1_13_bc2_36_bc3_48	18	1176
	1214-7_bc1_15_bc2_95_bc3_90	2	3	1214-8_bc1_13_bc2_37_bc3_46	2	5
	1214-7_bc1_15_bc2_96_bc3_12	16	5436	1214-8_bc1_13_bc2_37_bc3_87	1	3
	1214-7_bc1_16_bc2_13_bc3_35	3	5	1214-8_bc1_13_bc2_37_bc3_89	1	1
	1214-7_bc1_16_bc2_13_bc3_50	1	2	1214-8_bc1_13_bc2_37_bc3_90	104	3551
	1214-7_bc1_16_bc2_13_bc3_90	578	22962	1214-8_bc1_13_bc2_37_bc3_94	3	4
	1214-7_bc1_16_bc2_13_bc3_94	2	2	1214-8_bc1_13_bc2_37_bc3_95	4	4
	1214-7_bc1_16_bc2_14_bc3_40	2	2	1214-8_bc1_13_bc2_39_bc3_36	47	59
	1214-7_bc1_16_bc2_14_bc3_57	1	1	1214-8_bc1_13_bc2_39_bc3_64	18	24
	1214-7_bc1_16_bc2_14_bc3_73	5	6	1214-8_bc1_13_bc2_39_bc3_68	22	26
	1214-7_bc1_16_bc2_14_bc3_76	1	5	1214-8_bc1_13_bc2_4_bc3_63	14	37
	1214-7_bc1_16_bc2_14_bc3_91	410	13139	1214-8_bc1_13_bc2_43_bc3_52	1	5
	1214-7_bc1_16_bc2_15_bc3_11	5	26	1214-8_bc1_13_bc2_43_bc3_90	1	2
	1214-7_bc1_16_bc2_15_bc3_17	2	6	1214-8_bc1_13_bc2_44_bc3_20	32	76
	1214-7_bc1_16_bc2_15_bc3_59	3	3	1214-8_bc1_13_bc2_44_bc3_26	3	3
	1214-7_bc1_16_bc2_15_bc3_67	1	5	1214-8_bc1_13_bc2_46_bc3_36	43	49
	1214-7_bc1_16_bc2_15_bc3_96	11	13	1214-8_bc1_13_bc2_46_bc3_76	2	13
	1214-7_bc1_16_bc2_16_bc3_28	4	7	1214-8_bc1_13_bc2_46_bc3_79	12	15
	1214-7_bc1_16_bc2_16_bc3_3	4	21	1214-8_bc1_13_bc2_48_bc3_86	4	14
	1214-7_bc1_16_bc2_16_bc3_35	3	3	1214-8_bc1_13_bc2_48_bc3_96	25	66
	1214-7_bc1_16_bc2_16_bc3_60	695	24585	1214-8_bc1_13_bc2_49_bc3_4	15	3613
	1214-7_bc1_16_bc2_16_bc3_66	4	5	1214-8_bc1_13_bc2_49_bc3_85	59	64
	1214-7_bc1_16_bc2_16_bc3_73	3	3	1214-8_bc1_13_bc2_5_bc3_89	6	4268
	1214-7_bc1_16_bc2_16_bc3_78	2	2	1214-8_bc1_13_bc2_50_bc3_47	10	13
	1214-7_bc1_16_bc2_16_bc3_85	1	1	1214-8_bc1_13_bc2_50_bc3_88	30	7106
	1214-7_bc1_16_bc2_16_bc3_86	4	4	1214-8_bc1_13_bc2_51_bc3_66	2	2
	1214-7_bc1_16_bc2_19_bc3_84	2	2	1214-8_bc1_13_bc2_52_bc3_12	6	8
	1214-7_bc1_16_bc2_2_bc3_30	4	17	1214-8_bc1_13_bc2_52_bc3_72	465	34439
	1214-7_bc1_16_bc2_2_bc3_78	304	351	1214-8_bc1_13_bc2_52_bc3_73	2	3
	1214-7_bc1_16_bc2_2_bc3_92	1	1	1214-8_bc1_13_bc2_52_bc3_88	2	2
	1214-7_bc1_16_bc2_20_bc3_20	3	3	1214-8_bc1_13_bc2_52_bc3_90	3	3
	1214-7_bc1_16_bc2_20_bc3_36	25	33	1214-8_bc1_13_bc2_52_bc3_91	1	1
	1214-7_bc1_16_bc2_20_bc3_69	250	6670	1214-8_bc1_13_bc2_52_bc3_94	3	3
	1214-7_bc1_16_bc2_20_bc3_84	3	3	1214-8_bc1_13_bc2_53_bc3_35	1	1
	1214-7_bc1_16_bc2_20_bc3_94	3	10	1214-8_bc1_13_bc2_53_bc3_59	77	84
	1214-7_bc1_16_bc2_20_bc3_95	271	5263	1214-8_bc1_13_bc2_53_bc3_65	2	3
	1214-7_bc1_16_bc2_21_bc3_2	3	23	1214-8_bc1_13_bc2_53_bc3_71	74	3438
	1214-7_bc1_16_bc2_21_bc3_27	2	9	1214-8_bc1_13_bc2_53_bc3_75	1	1
	1214-7_bc1_16_bc2_21_bc3_45	1	1	1214-8_bc1_13_bc2_54_bc3_23	2	3
	1214-7_bc1_16_bc2_23_bc3_70	220	255	1214-8_bc1_13_bc2_54_bc3_55	303	6506
	1214-7_bc1_16_bc2_24_bc3_26	506	47981	1214-8_bc1_13_bc2_54_bc3_67	8	24
	1214-7_bc1_16_bc2_24_bc3_47	2	2	1214-8_bc1_13_bc2_54_bc3_71	6	25
	1214-7_bc1_16_bc2_24_bc3_57	4	4	1214-8_bc1_13_bc2_54_bc3_77	3	4
	1214-7_bc1_16_bc2_24_bc3_78	4	7	1214-8_bc1_13_bc2_54_bc3_78	2	2
	1214-7_bc1_16_bc2_24_bc3_82	1	9	1214-8_bc1_13_bc2_54_bc3_89	2	2
	1214-7_bc1_16_bc2_24_bc3_84	5	7	1214-8_bc1_13_bc2_54_bc3_91	63	5553
	1214-7_bc1_16_bc2_25_bc3_16	2	2	1214-8_bc1_13_bc2_55_bc3_28	31	1643
	1214-7_bc1_16_bc2_25_bc3_18	213	12267	1214-8_bc1_13_bc2_56_bc3_17	6	7
	1214-7_bc1_16_bc2_25_bc3_19	3	3	1214-8_bc1_13_bc2_56_bc3_18	804	55142
	1214-7_bc1_16_bc2_25_bc3_23	591	3545	1214-8_bc1_13_bc2_56_bc3_2	2	2
	1214-7_bc1_16_bc2_25_bc3_26	1	1	1214-8_bc1_13_bc2_56_bc3_36	6	8
	1214-7_bc1_16_bc2_25_bc3_57	2	15	1214-8_bc1_13_bc2_56_bc3_45	5	5
	1214-7_bc1_16_bc2_25_bc3_63	21	25	1214-8_bc1_13_bc2_56_bc3_5	4	4
	1214-7_bc1_16_bc2_25_bc3_95	18	24	1214-8_bc1_13_bc2_56_bc3_73	3	8
	1214-7_bc1_16_bc2_26_bc3_26	4	4	1214-8_bc1_13_bc2_56_bc3_77	17	21
	1214-7_bc1_16_bc2_26_bc3_57	25	27	1214-8_bc1_13_bc2_56_bc3_78	38	3112
	1214-7_bc1_16_bc2_26_bc3_60	2	11	1214-8_bc1_13_bc2_56_bc3_87	3	3
	1214-7_bc1_16_bc2_27_bc3_15	2	11	1214-8_bc1_13_bc2_56_bc3_9	7	8
	1214-7_bc1_16_bc2_27_bc3_61	28	35	1214-8_bc1_13_bc2_56_bc3_95	3	3
	1214-7_bc1_16_bc2_28_bc3_1	11	15	1214-8_bc1_13_bc2_57_bc3_45	78	3148
	1214-7_bc1_16_bc2_28_bc3_32	2	2	1214-8_bc1_13_bc2_57_bc3_58	14	15
	1214-7_bc1_16_bc2_29_bc3_22	2	7	1214-8_bc1_13_bc2_59_bc3_39	35	44
	1214-7_bc1_16_bc2_29_bc3_5	20	21	1214-8_bc1_13_bc2_59_bc3_52	26	29
	1214-7_bc1_16_bc2_29_bc3_81	9	11	1214-8_bc1_13_bc2_6_bc3_16	3	3
	1214-7_bc1_16_bc2_29_bc3_95	2	4	1214-8_bc1_13_bc2_6_bc3_29	938	77010
	1214-7_bc1_16_bc2_30_bc3_29	2	22	1214-8_bc1_13_bc2_6_bc3_35	1	1
	1214-7_bc1_16_bc2_32_bc3_14	1	1	1214-8_bc1_13_bc2_6_bc3_41	3	3
	1214-7_bc1_16_bc2_32_bc3_16	1	1	1214-8_bc1_13_bc2_6_bc3_75	2	2
	1214-7_bc1_16_bc2_32_bc3_24	606	7628	1214-8_bc1_13_bc2_60_bc3_77	4	5
	1214-7_bc1_16_bc2_32_bc3_31	1	1	1214-8_bc1_13_bc2_60_bc3_79	13	19
	1214-7_bc1_16_bc2_33_bc3_67	26	33	1214-8_bc1_13_bc2_60_bc3_81	9	11
	1214-7_bc1_16_bc2_33_bc3_75	15	19	1214-8_bc1_13_bc2_60_bc3_85	4	5
	1214-7_bc1_16_bc2_33_bc3_76	14	60	1214-8_bc1_13_bc2_61_bc3_19	10	13
	1214-7_bc1_16_bc2_33_bc3_91	4	7	1214-8_bc1_13_bc2_61_bc3_26	4	4
	1214-7_bc1_16_bc2_34_bc3_47	1	6	1214-8_bc1_13_bc2_63_bc3_19	7	8
	1214-7_bc1_16_bc2_35_bc3_82	10	14	1214-8_bc1_13_bc2_63_bc3_72	2	3
	1214-7_bc1_16_bc2_37_bc3_5	31	33	1214-8_bc1_13_bc2_64_bc3_24	13	18
	1214-7_bc1_16_bc2_38_bc3_78	3	3	1214-8_bc1_13_bc2_64_bc3_26	1	30
	1214-7_bc1_16_bc2_39_bc3_14	612	33270	1214-8_bc1_13_bc2_64_bc3_30	16	16
	1214-7_bc1_16_bc2_39_bc3_15	2	2	1214-8_bc1_13_bc2_64_bc3_90	5	12
	1214-7_bc1_16_bc2_39_bc3_19	2	2	1214-8_bc1_13_bc2_64_bc3_94	12	13
	1214-7_bc1_16_bc2_39_bc3_28	21	23	1214-8_bc1_13_bc2_66_bc3_35	12	12
	1214-7_bc1_16_bc2_39_bc3_35	1	1	1214-8_bc1_13_bc2_66_bc3_52	4	4
	1214-7_bc1_16_bc2_39_bc3_78	3	4	1214-8_bc1_13_bc2_66_bc3_7	3	5
	1214-7_bc1_16_bc2_39_bc3_86	22	23	1214-8_bc1_13_bc2_66_bc3_73	4	4
	1214-7_bc1_16_bc2_39_bc3_90	2	2	1214-8_bc1_13_bc2_66_bc3_84	52	200
	1214-7_bc1_16_bc2_4_bc3_40	5	5	1214-8_bc1_13_bc2_66_bc3_88	1	1
	1214-7_bc1_16_bc2_40_bc3_27	9	47	1214-8_bc1_13_bc2_67_bc3_1	7	7
	1214-7_bc1_16_bc2_40_bc3_78	413	10250	1214-8_bc1_13_bc2_68_bc3_66	292	24162
	1214-7_bc1_16_bc2_40_bc3_91	2	2	1214-8_bc1_13_bc2_69_bc3_60	67	6825
	1214-7_bc1_16_bc2_41_bc3_82	3	14	1214-8_bc1_13_bc2_7_bc3_68	8	1526
	1214-7_bc1_16_bc2_42_bc3_78	47	55	1214-8_bc1_13_bc2_7_bc3_78	3	30
	1214-7_bc1_16_bc2_42_bc3_86	28	32	1214-8_bc1_13_bc2_7_bc3_87	16	774
	1214-7_bc1_16_bc2_43_bc3_2	6	6	1214-8_bc1_13_bc2_70_bc3_3	56	935
	1214-7_bc1_16_bc2_44_bc3_19	4	6	1214-8_bc1_13_bc2_71_bc3_15	17	19
	1214-7_bc1_16_bc2_45_bc3_60	1	2	1214-8_bc1_13_bc2_71_bc3_3	6	12
	1214-7_bc1_16_bc2_46_bc3_63	25	151	1214-8_bc1_13_bc2_71_bc3_90	5	6
	1214-7_bc1_16_bc2_46_bc3_64	2	9	1214-8_bc1_13_bc2_72_bc3_31	12	14
	1214-7_bc1_16_bc2_48_bc3_46	18	21	1214-8_bc1_13_bc2_73_bc3_1	100	6188
	1214-7_bc1_16_bc2_5_bc3_41	220	278	1214-8_bc1_13_bc2_73_bc3_39	5	17
	1214-7_bc1_16_bc2_50_bc3_48	1	1	1214-8_bc1_13_bc2_73_bc3_86	5	17
	1214-7_bc1_16_bc2_50_bc3_64	1	1	1214-8_bc1_13_bc2_74_bc3_15	2	3
	1214-7_bc1_16_bc2_50_bc3_69	92	103	1214-8_bc1_13_bc2_74_bc3_16	9	26
	1214-7_bc1_16_bc2_50_bc3_76	2	2	1214-8_bc1_13_bc2_74_bc3_73	2	2
	1214-7_bc1_16_bc2_50_bc3_79	4	5	1214-8_bc1_13_bc2_74_bc3_86	28	30
	1214-7_bc1_16_bc2_50_bc3_83	365	4972	1214-8_bc1_13_bc2_75_bc3_33	2	2
	1214-7_bc1_16_bc2_52_bc3_12	10	47	1214-8_bc1_13_bc2_75_bc3_38	45	3264
	1214-7_bc1_16_bc2_52_bc3_14	8	18	1214-8_bc1_13_bc2_75_bc3_48	1	1
	1214-7_bc1_16_bc2_53_bc3_80	34	44	1214-8_bc1_13_bc2_75_bc3_63	61	65
	1214-7_bc1_16_bc2_56_bc3_12	3	4	1214-8_bc1_13_bc2_75_bc3_73	151	9237
	1214-7_bc1_16_bc2_56_bc3_44	9	10	1214-8_bc1_13_bc2_75_bc3_75	4	14
	1214-7_bc1_16_bc2_58_bc3_76	29	32	1214-8_bc1_13_bc2_76_bc3_11	4	5
	1214-7_bc1_16_bc2_6_bc3_30	4	5	1214-8_bc1_13_bc2_76_bc3_25	1	1
	1214-7_bc1_16_bc2_6_bc3_75	34	38	1214-8_bc1_13_bc2_76_bc3_29	10	12
	1214-7_bc1_16_bc2_6_bc3_86	1	2	1214-8_bc1_13_bc2_76_bc3_33	4	6
	1214-7_bc1_16_bc2_60_bc3_16	5	20	1214-8_bc1_13_bc2_76_bc3_34	6	6
	1214-7_bc1_16_bc2_60_bc3_80	11	36	1214-8_bc1_13_bc2_76_bc3_36	2	4
	1214-7_bc1_16_bc2_61_bc3_19	2	2	1214-8_bc1_13_bc2_76_bc3_38	313	15023
	1214-7_bc1_16_bc2_61_bc3_92	7	7	1214-8_bc1_13_bc2_76_bc3_40	2	3
	1214-7_bc1_16_bc2_62_bc3_72	660	40004	1214-8_bc1_13_bc2_76_bc3_41	365	39441
	1214-7_bc1_16_bc2_62_bc3_77	3	6	1214-8_bc1_13_bc2_76_bc3_42	5	5
	1214-7_bc1_16_bc2_62_bc3_84	3	3	1214-8_bc1_13_bc2_76_bc3_44	7	9
	1214-7_bc1_16_bc2_62_bc3_87	9	13	1214-8_bc1_13_bc2_76_bc3_52	33	37
	1214-7_bc1_16_bc2_62_bc3_88	15	17	1214-8_bc1_13_bc2_76_bc3_65	4	4
	1214-7_bc1_16_bc2_63_bc3_18	8	53	1214-8_bc1_13_bc2_76_bc3_77	4	4
	1214-7_bc1_16_bc2_63_bc3_53	1	1	1214-8_bc1_13_bc2_76_bc3_8	3	3
	1214-7_bc1_16_bc2_63_bc3_64	283	849	1214-8_bc1_13_bc2_76_bc3_92	2	3
	1214-7_bc1_16_bc2_64_bc3_16	4	8	1214-8_bc1_13_bc2_77_bc3_1	1	1
	1214-7_bc1_16_bc2_64_bc3_18	87	4322	1214-8_bc1_13_bc2_77_bc3_89	1	1
	1214-7_bc1_16_bc2_64_bc3_60	23	27	1214-8_bc1_13_bc2_78_bc3_13	2	6
	1214-7_bc1_16_bc2_64_bc3_94	9	14	1214-8_bc1_13_bc2_8_bc3_22	5	6
	1214-7_bc1_16_bc2_65_bc3_14	1	1	1214-8_bc1_13_bc2_8_bc3_31	2	2
	1214-7_bc1_16_bc2_65_bc3_16	26	30	1214-8_bc1_13_bc2_8_bc3_36	3	13
	1214-7_bc1_16_bc2_65_bc3_50	3	4	1214-8_bc1_13_bc2_8_bc3_37	104	18092
	1214-7_bc1_16_bc2_65_bc3_51	26	28	1214-8_bc1_13_bc2_8_bc3_45	2	8
	1214-7_bc1_16_bc2_65_bc3_66	2	2	1214-8_bc1_13_bc2_80_bc3_24	4	4
	1214-7_bc1_16_bc2_65_bc3_67	1	1	1214-8_bc1_13_bc2_81_bc3_92	12	15
	1214-7_bc1_16_bc2_65_bc3_79	451	10962	1214-8_bc1_13_bc2_82_bc3_2	9	10
	1214-7_bc1_16_bc2_65_bc3_90	2	2	1214-8_bc1_13_bc2_83_bc3_28	14	14
	1214-7_bc1_16_bc2_66_bc3_22	2	2	1214-8_bc1_13_bc2_84_bc3_16	14	17
	1214-7_bc1_16_bc2_67_bc3_65	40	45	1214-8_bc1_13_bc2_84_bc3_32	3	3
	1214-7_bc1_16_bc2_67_bc3_73	4	9	1214-8_bc1_13_bc2_84_bc3_40	6	7
	1214-7_bc1_16_bc2_68_bc3_43	4	15	1214-8_bc1_13_bc2_84_bc3_71	169	185
	1214-7_bc1_16_bc2_69_bc3_14	237	4027	1214-8_bc1_13_bc2_84_bc3_81	1	2
	1214-7_bc1_16_bc2_69_bc3_84	29	31	1214-8_bc1_13_bc2_87_bc3_19	295	4676
	1214-7_bc1_16_bc2_70_bc3_28	317	12752	1214-8_bc1_13_bc2_87_bc3_32	8	9
	1214-7_bc1_16_bc2_70_bc3_78	3	3	1214-8_bc1_13_bc2_87_bc3_44	69	3349
	1214-7_bc1_16_bc2_71_bc3_30	30	32	1214-8_bc1_13_bc2_87_bc3_68	2	2
	1214-7_bc1_16_bc2_71_bc3_46	6	6	1214-8_bc1_13_bc2_88_bc3_13	4	4
	1214-7_bc1_16_bc2_71_bc3_47	3	13	1214-8_bc1_13_bc2_88_bc3_19	9	22
	1214-7_bc1_16_bc2_73_bc3_8	4	14	1214-8_bc1_13_bc2_88_bc3_4	2	2
	1214-7_bc1_16_bc2_73_bc3_95	2	4	1214-8_bc1_13_bc2_88_bc3_83	60	616
	1214-7_bc1_16_bc2_74_bc3_17	2	6	1214-8_bc1_13_bc2_89_bc3_19	10	43
	1214-7_bc1_16_bc2_74_bc3_76	13	69	1214-8_bc1_13_bc2_90_bc3_28	10	11
	1214-7_bc1_16_bc2_74_bc3_79	6	32	1214-8_bc1_13_bc2_90_bc3_63	1	3
	1214-7_bc1_16_bc2_75_bc3_28	2	2	1214-8_bc1_13_bc2_90_bc3_69	3	3
	1214-7_bc1_16_bc2_75_bc3_68	29	34	1214-8_bc1_13_bc2_90_bc3_73	2	2
	1214-7_bc1_16_bc2_76_bc3_14	682	23677	1214-8_bc1_13_bc2_90_bc3_74	16	20
	1214-7_bc1_16_bc2_76_bc3_16	2	2	1214-8_bc1_13_bc2_90_bc3_81	3	3
	1214-7_bc1_16_bc2_76_bc3_18	4	4	1214-8_bc1_13_bc2_90_bc3_83	494	24125
	1214-7_bc1_16_bc2_76_bc3_20	2	3	1214-8_bc1_13_bc2_92_bc3_74	4	12
	1214-7_bc1_16_bc2_76_bc3_22	2	15	1214-8_bc1_13_bc2_92_bc3_76	37	44
	1214-7_bc1_16_bc2_76_bc3_28	1	1	1214-8_bc1_13_bc2_93_bc3_73	12	13
	1214-7_bc1_16_bc2_76_bc3_33	2	2	1214-8_bc1_13_bc2_93_bc3_94	11	13
	1214-7_bc1_16_bc2_76_bc3_37	24	29	1214-8_bc1_13_bc2_95_bc3_54	3	3
	1214-7_bc1_16_bc2_76_bc3_45	1	1	1214-8_bc1_13_bc2_95_bc3_78	10	10
	1214-7_bc1_16_bc2_76_bc3_47	8	10	1214-8_bc1_13_bc2_96_bc3_54	3	11
	1214-7_bc1_16_bc2_76_bc3_48	2	4	1214-8_bc1_14_bc2_10_bc3_45	10	12
	1214-7_bc1_16_bc2_76_bc3_53	2	2	1214-8_bc1_14_bc2_10_bc3_46	282	13912
	1214-7_bc1_16_bc2_76_bc3_57	3	3	1214-8_bc1_14_bc2_10_bc3_71	10	10
	1214-7_bc1_16_bc2_76_bc3_58	1	1	1214-8_bc1_14_bc2_11_bc3_83	30	35
	1214-7_bc1_16_bc2_76_bc3_6	2	2	1214-8_bc1_14_bc2_11_bc3_95	1	1
	1214-7_bc1_16_bc2_76_bc3_72	5	6	1214-8_bc1_14_bc2_12_bc3_15	20	21
	1214-7_bc1_16_bc2_76_bc3_74	2	4	1214-8_bc1_14_bc2_12_bc3_34	6	7
	1214-7_bc1_16_bc2_76_bc3_84	2	2	1214-8_bc1_14_bc2_12_bc3_83	8	8
	1214-7_bc1_16_bc2_76_bc3_95	3	4	1214-8_bc1_14_bc2_13_bc3_20	4	5
	1214-7_bc1_16_bc2_77_bc3_31	6	28	1214-8_bc1_14_bc2_13_bc3_29	9	10
	1214-7_bc1_16_bc2_77_bc3_60	23	28	1214-8_bc1_14_bc2_13_bc3_68	81	2822
	1214-7_bc1_16_bc2_77_bc3_62	4	28	1214-8_bc1_14_bc2_14_bc3_29	4	6
	1214-7_bc1_16_bc2_79_bc3_94	17	17	1214-8_bc1_14_bc2_15_bc3_34	17	20
	1214-7_bc1_16_bc2_8_bc3_20	5	5	1214-8_bc1_14_bc2_15_bc3_40	2	5
	1214-7_bc1_16_bc2_8_bc3_4	442	562	1214-8_bc1_14_bc2_15_bc3_74	10	11
	1214-7_bc1_16_bc2_80_bc3_16	26	920	1214-8_bc1_14_bc2_17_bc3_66	2	2
	1214-7_bc1_16_bc2_80_bc3_86	2	2	1214-8_bc1_14_bc2_18_bc3_69	115	142
	1214-7_bc1_16_bc2_81_bc3_91	3	13	1214-8_bc1_14_bc2_18_bc3_8	34	2577
	1214-7_bc1_16_bc2_82_bc3_63	4	6	1214-8_bc1_14_bc2_19_bc3_63	8	8
	1214-7_bc1_16_bc2_82_bc3_77	33	38	1214-8_bc1_14_bc2_2_bc3_32	4	6
	1214-7_bc1_16_bc2_83_bc3_1	12	71	1214-8_bc1_14_bc2_2_bc3_92	2	5
	1214-7_bc1_16_bc2_83_bc3_42	24	27	1214-8_bc1_14_bc2_20_bc3_16	24	64
	1214-7_bc1_16_bc2_83_bc3_43	21	26	1214-8_bc1_14_bc2_20_bc3_46	2	2
	1214-7_bc1_16_bc2_83_bc3_85	2	2	1214-8_bc1_14_bc2_20_bc3_50	188	2810
	1214-7_bc1_16_bc2_84_bc3_66	17	2722	1214-8_bc1_14_bc2_20_bc3_58	3	3
	1214-7_bc1_16_bc2_84_bc3_8	27	30	1214-8_bc1_14_bc2_20_bc3_89	1	1
	1214-7_bc1_16_bc2_85_bc3_78	6	12	1214-8_bc1_14_bc2_21_bc3_21	100	106
	1214-7_bc1_16_bc2_86_bc3_15	3	3	1214-8_bc1_14_bc2_21_bc3_94	7	8
	1214-7_bc1_16_bc2_86_bc3_16	1	1	1214-8_bc1_14_bc2_24_bc3_24	89	102
	1214-7_bc1_16_bc2_86_bc3_17	107	129	1214-8_bc1_14_bc2_24_bc3_25	11	12
	1214-7_bc1_16_bc2_86_bc3_20	2	4	1214-8_bc1_14_bc2_24_bc3_88	64	72
	1214-7_bc1_16_bc2_86_bc3_23	33	1492	1214-8_bc1_14_bc2_25_bc3_23	104	115
	1214-7_bc1_16_bc2_86_bc3_25	1	1	1214-8_bc1_14_bc2_26_bc3_3	17	18
	1214-7_bc1_16_bc2_86_bc3_35	1	1	1214-8_bc1_14_bc2_26_bc3_48	2	2
	1214-7_bc1_16_bc2_86_bc3_52	7	11	1214-8_bc1_14_bc2_26_bc3_80	101	3031
	1214-7_bc1_16_bc2_86_bc3_94	550	35677	1214-8_bc1_14_bc2_26_bc3_92	1	1
	1214-7_bc1_16_bc2_86_bc3_96	2	2	1214-8_bc1_14_bc2_27_bc3_69	2	4
	1214-7_bc1_16_bc2_87_bc3_23	3	9	1214-8_bc1_14_bc2_27_bc3_8	13	14
	1214-7_bc1_16_bc2_87_bc3_94	42	58	1214-8_bc1_14_bc2_28_bc3_14	17	19
	1214-7_bc1_16_bc2_88_bc3_41	26	31	1214-8_bc1_14_bc2_28_bc3_31	36	2105
	1214-7_bc1_16_bc2_89_bc3_77	243	284	1214-8_bc1_14_bc2_28_bc3_41	2	2
	1214-7_bc1_16_bc2_89_bc3_87	2	2	1214-8_bc1_14_bc2_28_bc3_59	5	7
	1214-7_bc1_16_bc2_9_bc3_33	3	3	1214-8_bc1_14_bc2_29_bc3_8	14	16
	1214-7_bc1_16_bc2_9_bc3_92	2	17	1214-8_bc1_14_bc2_3_bc3_18	5	19
	1214-7_bc1_16_bc2_90_bc3_60	18	21	1214-8_bc1_14_bc2_3_bc3_94	47	56
	1214-7_bc1_16_bc2_90_bc3_75	27	29	1214-8_bc1_14_bc2_30_bc3_71	116	6197
	1214-7_bc1_16_bc2_92_bc3_91	1	4	1214-8_bc1_14_bc2_30_bc3_91	2	6
	1214-7_bc1_16_bc2_93_bc3_75	17	21	1214-8_bc1_14_bc2_32_bc3_26	17	18
	1214-7_bc1_16_bc2_94_bc3_66	8	38	1214-8_bc1_14_bc2_33_bc3_32	3	5
	1214-7_bc1_16_bc2_95_bc3_54	5	20	1214-8_bc1_14_bc2_33_bc3_72	14	1120
	1214-7_bc1_17_bc2_10_bc3_16	146	164	1214-8_bc1_14_bc2_33_bc3_74	1	1
	1214-7_bc1_17_bc2_10_bc3_30	2	2	1214-8_bc1_14_bc2_35_bc3_26	5	5
	1214-7_bc1_17_bc2_10_bc3_96	288	29453	1214-8_bc1_14_bc2_35_bc3_37	1	10
	1214-7_bc1_17_bc2_12_bc3_50	6	41	1214-8_bc1_14_bc2_35_bc3_44	3	3
	1214-7_bc1_17_bc2_13_bc3_96	159	184	1214-8_bc1_14_bc2_35_bc3_57	3	4
	1214-7_bc1_17_bc2_15_bc3_30	1	1	1214-8_bc1_14_bc2_35_bc3_66	2	2
	1214-7_bc1_17_bc2_16_bc3_46	7	27	1214-8_bc1_14_bc2_35_bc3_71	101	7791
	1214-7_bc1_17_bc2_16_bc3_78	22	25	1214-8_bc1_14_bc2_35_bc3_72	2	2
	1214-7_bc1_17_bc2_16_bc3_85	9	14	1214-8_bc1_14_bc2_35_bc3_90	87	96
	1214-7_bc1_17_bc2_17_bc3_69	35	3932	1214-8_bc1_14_bc2_37_bc3_46	2	2
	1214-7_bc1_17_bc2_19_bc3_54	195	4602	1214-8_bc1_14_bc2_37_bc3_58	11	16
	1214-7_bc1_17_bc2_22_bc3_13	115	10342	1214-8_bc1_14_bc2_37_bc3_69	13	15
	1214-7_bc1_17_bc2_22_bc3_31	2	19	1214-8_bc1_14_bc2_37_bc3_70	4	4
	1214-7_bc1_17_bc2_23_bc3_25	74	5502	1214-8_bc1_14_bc2_37_bc3_94	137	15498
	1214-7_bc1_17_bc2_24_bc3_26	6	22	1214-8_bc1_14_bc2_39_bc3_41	1	1
	1214-7_bc1_17_bc2_26_bc3_12	2	11	1214-8_bc1_14_bc2_39_bc3_73	1	1
	1214-7_bc1_17_bc2_26_bc3_85	4	6	1214-8_bc1_14_bc2_4_bc3_77	2	7
	1214-7_bc1_17_bc2_26_bc3_88	6	29	1214-8_bc1_14_bc2_4_bc3_8	17	20
	1214-7_bc1_17_bc2_27_bc3_8	142	178	1214-8_bc1_14_bc2_4_bc3_93	3	12
	1214-7_bc1_17_bc2_28_bc3_8	3	4	1214-8_bc1_14_bc2_40_bc3_87	11	12
	1214-7_bc1_17_bc2_29_bc3_81	113	4336	1214-8_bc1_14_bc2_40_bc3_93	36	41
	1214-7_bc1_17_bc2_29_bc3_88	84	95	1214-8_bc1_14_bc2_43_bc3_23	70	124
	1214-7_bc1_17_bc2_30_bc3_42	83	96	1214-8_bc1_14_bc2_44_bc3_1	9	26
	1214-7_bc1_17_bc2_30_bc3_86	89	4266	1214-8_bc1_14_bc2_45_bc3_31	22	2717
	1214-7_bc1_17_bc2_31_bc3_22	5	5	1214-8_bc1_14_bc2_45_bc3_72	6	1319
	1214-7_bc1_17_bc2_31_bc3_64	21	80	1214-8_bc1_14_bc2_47_bc3_27	4	10
	1214-7_bc1_17_bc2_32_bc3_86	2	24	1214-8_bc1_14_bc2_47_bc3_37	5	5
	1214-7_bc1_17_bc2_33_bc3_23	502	7660	1214-8_bc1_14_bc2_48_bc3_12	23	79
	1214-7_bc1_17_bc2_33_bc3_39	2	2	1214-8_bc1_14_bc2_48_bc3_14	4	7
	1214-7_bc1_17_bc2_33_bc3_64	3	4	1214-8_bc1_14_bc2_48_bc3_47	1	1
	1214-7_bc1_17_bc2_33_bc3_67	24	29	1214-8_bc1_14_bc2_48_bc3_60	306	6129
	1214-7_bc1_17_bc2_34_bc3_40	24	30	1214-8_bc1_14_bc2_48_bc3_80	44	472
	1214-7_bc1_17_bc2_36_bc3_1	22	23	1214-8_bc1_14_bc2_48_bc3_95	3	3
	1214-7_bc1_17_bc2_39_bc3_28	13	16	1214-8_bc1_14_bc2_48_bc3_96	2	2
	1214-7_bc1_17_bc2_39_bc3_42	30	38	1214-8_bc1_14_bc2_49_bc3_28	3	3
	1214-7_bc1_17_bc2_41_bc3_83	55	220	1214-8_bc1_14_bc2_5_bc3_11	26	30
	1214-7_bc1_17_bc2_44_bc3_7	81	4342	1214-8_bc1_14_bc2_5_bc3_69	7	9
	1214-7_bc1_17_bc2_48_bc3_12	4	5	1214-8_bc1_14_bc2_5_bc3_77	8	9
	1214-7_bc1_17_bc2_48_bc3_14	2	2	1214-8_bc1_14_bc2_50_bc3_32	3	3
	1214-7_bc1_17_bc2_48_bc3_16	4	4	1214-8_bc1_14_bc2_50_bc3_46	6	6
	1214-7_bc1_17_bc2_48_bc3_18	540	49126	1214-8_bc1_14_bc2_50_bc3_57	4	6
	1214-7_bc1_17_bc2_48_bc3_23	7	8	1214-8_bc1_14_bc2_50_bc3_86	13	14
	1214-7_bc1_17_bc2_48_bc3_6	354	22679	1214-8_bc1_14_bc2_50_bc3_92	1	1
	1214-7_bc1_17_bc2_48_bc3_64	3	3	1214-8_bc1_14_bc2_51_bc3_25	15	18
	1214-7_bc1_17_bc2_48_bc3_67	2	2	1214-8_bc1_14_bc2_51_bc3_90	17	19
	1214-7_bc1_17_bc2_49_bc3_32	27	173	1214-8_bc1_14_bc2_52_bc3_16	1	2
	1214-7_bc1_17_bc2_49_bc3_43	21	22	1214-8_bc1_14_bc2_52_bc3_23	498	13394
	1214-7_bc1_17_bc2_50_bc3_10	1	1	1214-8_bc1_14_bc2_52_bc3_25	14	15
	1214-7_bc1_17_bc2_50_bc3_13	8	31	1214-8_bc1_14_bc2_52_bc3_29	4	4
	1214-7_bc1_17_bc2_52_bc3_7	12	59	1214-8_bc1_14_bc2_52_bc3_39	1	1
	1214-7_bc1_17_bc2_53_bc3_96	20	27	1214-8_bc1_14_bc2_52_bc3_40	1	1
	1214-7_bc1_17_bc2_54_bc3_14	150	5190	1214-8_bc1_14_bc2_52_bc3_44	1	4
	1214-7_bc1_17_bc2_54_bc3_20	6	6	1214-8_bc1_14_bc2_52_bc3_72	2	2
	1214-7_bc1_17_bc2_54_bc3_86	324	22035	1214-8_bc1_14_bc2_52_bc3_79	4	7
	1214-7_bc1_17_bc2_56_bc3_51	2	5	1214-8_bc1_14_bc2_52_bc3_90	108	5416
	1214-7_bc1_17_bc2_57_bc3_28	23	27	1214-8_bc1_14_bc2_53_bc3_31	1	1
	1214-7_bc1_17_bc2_6_bc3_85	278	11468	1214-8_bc1_14_bc2_53_bc3_66	6	10
	1214-7_bc1_17_bc2_60_bc3_41	3	15	1214-8_bc1_14_bc2_53_bc3_75	1	1
	1214-7_bc1_17_bc2_60_bc3_73	3	7	1214-8_bc1_14_bc2_54_bc3_23	1	2
	1214-7_bc1_17_bc2_61_bc3_94	150	176	1214-8_bc1_14_bc2_54_bc3_45	4	6
	1214-7_bc1_17_bc2_63_bc3_69	4	34	1214-8_bc1_14_bc2_54_bc3_55	1	10
	1214-7_bc1_17_bc2_65_bc3_16	19	19	1214-8_bc1_14_bc2_54_bc3_62	5	6
	1214-7_bc1_17_bc2_66_bc3_75	27	29	1214-8_bc1_14_bc2_54_bc3_77	3	5
	1214-7_bc1_17_bc2_67_bc3_59	1	5	1214-8_bc1_14_bc2_54_bc3_78	8	8
	1214-7_bc1_17_bc2_69_bc3_40	1	1	1214-8_bc1_14_bc2_56_bc3_15	5	7
	1214-7_bc1_17_bc2_7_bc3_20	25	27	1214-8_bc1_14_bc2_56_bc3_18	1	1
	1214-7_bc1_17_bc2_70_bc3_2	1	6	1214-8_bc1_14_bc2_56_bc3_20	1	2
	1214-7_bc1_17_bc2_70_bc3_62	329	18530	1214-8_bc1_14_bc2_57_bc3_37	3	4
	1214-7_bc1_17_bc2_71_bc3_77	59	66	1214-8_bc1_14_bc2_57_bc3_50	4	4
	1214-7_bc1_17_bc2_75_bc3_2	2	2	1214-8_bc1_14_bc2_57_bc3_53	12	14
	1214-7_bc1_17_bc2_77_bc3_21	9	34	1214-8_bc1_14_bc2_57_bc3_67	388	23269
	1214-7_bc1_17_bc2_77_bc3_47	22	23	1214-8_bc1_14_bc2_57_bc3_73	3	3
	1214-7_bc1_17_bc2_8_bc3_1	2	2	1214-8_bc1_14_bc2_58_bc3_41	60	63
	1214-7_bc1_17_bc2_8_bc3_11	7	22	1214-8_bc1_14_bc2_58_bc3_71	18	20
	1214-7_bc1_17_bc2_8_bc3_13	1	1	1214-8_bc1_14_bc2_59_bc3_79	44	3741
	1214-7_bc1_17_bc2_8_bc3_14	1	1	1214-8_bc1_14_bc2_6_bc3_29	1	1
	1214-7_bc1_17_bc2_8_bc3_16	4	7	1214-8_bc1_14_bc2_6_bc3_83	5	9
	1214-7_bc1_17_bc2_8_bc3_17	1	1	1214-8_bc1_14_bc2_60_bc3_46	2	2
	1214-7_bc1_17_bc2_8_bc3_18	2	2	1214-8_bc1_14_bc2_60_bc3_75	1	1
	1214-7_bc1_17_bc2_8_bc3_20	1475	47045	1214-8_bc1_14_bc2_60_bc3_85	4	6
	1214-7_bc1_17_bc2_8_bc3_25	7	7	1214-8_bc1_14_bc2_60_bc3_90	15	15
	1214-7_bc1_17_bc2_8_bc3_27	2	2	1214-8_bc1_14_bc2_61_bc3_20	61	71
	1214-7_bc1_17_bc2_8_bc3_28	2	3	1214-8_bc1_14_bc2_61_bc3_26	4	4
	1214-7_bc1_17_bc2_8_bc3_32	1	1	1214-8_bc1_14_bc2_61_bc3_43	5	6
	1214-7_bc1_17_bc2_8_bc3_33	1	1	1214-8_bc1_14_bc2_61_bc3_48	38	2565
	1214-7_bc1_17_bc2_8_bc3_34	3	5	1214-8_bc1_14_bc2_61_bc3_71	2	2
	1214-7_bc1_17_bc2_8_bc3_35	1	1	1214-8_bc1_14_bc2_61_bc3_79	570	14959
	1214-7_bc1_17_bc2_8_bc3_40	4	5	1214-8_bc1_14_bc2_61_bc3_82	3	3
	1214-7_bc1_17_bc2_8_bc3_41	1	1	1214-8_bc1_14_bc2_61_bc3_85	1	1
	1214-7_bc1_17_bc2_8_bc3_43	1	1	1214-8_bc1_14_bc2_61_bc3_86	1	1
	1214-7_bc1_17_bc2_8_bc3_48	4	5	1214-8_bc1_14_bc2_61_bc3_88	4	4
	1214-7_bc1_17_bc2_8_bc3_50	3	4	1214-8_bc1_14_bc2_62_bc3_11	3	3
	1214-7_bc1_17_bc2_8_bc3_52	2	2	1214-8_bc1_14_bc2_62_bc3_19	362	440
	1214-7_bc1_17_bc2_8_bc3_57	4	4	1214-8_bc1_14_bc2_62_bc3_72	4	12
	1214-7_bc1_17_bc2_8_bc3_62	4	4	1214-8_bc1_14_bc2_63_bc3_13	3	9
	1214-7_bc1_17_bc2_8_bc3_64	3	5	1214-8_bc1_14_bc2_63_bc3_52	2	2
	1214-7_bc1_17_bc2_8_bc3_7	1	2	1214-8_bc1_14_bc2_63_bc3_63	17	19
	1214-7_bc1_17_bc2_8_bc3_73	2	2	1214-8_bc1_14_bc2_63_bc3_68	125	2642
	1214-7_bc1_17_bc2_8_bc3_77	2	2	1214-8_bc1_14_bc2_63_bc3_73	3	3
	1214-7_bc1_17_bc2_8_bc3_78	1	1	1214-8_bc1_14_bc2_63_bc3_85	3	7
	1214-7_bc1_17_bc2_8_bc3_84	5	5	1214-8_bc1_14_bc2_63_bc3_90	12	12
	1214-7_bc1_17_bc2_8_bc3_86	2	2	1214-8_bc1_14_bc2_64_bc3_15	52	55
	1214-7_bc1_17_bc2_8_bc3_92	4	6	1214-8_bc1_14_bc2_64_bc3_37	5	6
	1214-7_bc1_17_bc2_8_bc3_94	3	3	1214-8_bc1_14_bc2_64_bc3_57	98	6599
	1214-7_bc1_17_bc2_8_bc3_96	1	1	1214-8_bc1_14_bc2_64_bc3_7	19	23
	1214-7_bc1_17_bc2_80_bc3_16	30	36	1214-8_bc1_14_bc2_64_bc3_90	1	1
	1214-7_bc1_17_bc2_82_bc3_60	45	54	1214-8_bc1_14_bc2_65_bc3_57	1	2
	1214-7_bc1_17_bc2_83_bc3_27	19	23	1214-8_bc1_14_bc2_65_bc3_73	438	5770
	1214-7_bc1_17_bc2_84_bc3_82	4	11	1214-8_bc1_14_bc2_65_bc3_94	4	8
	1214-7_bc1_17_bc2_88_bc3_84	1	1	1214-8_bc1_14_bc2_66_bc3_24	66	2206
	1214-7_bc1_17_bc2_89_bc3_17	329	23083	1214-8_bc1_14_bc2_66_bc3_89	2	2
	1214-7_bc1_17_bc2_9_bc3_65	4	15	1214-8_bc1_14_bc2_67_bc3_37	14	1793
	1214-7_bc1_17_bc2_90_bc3_60	32	35	1214-8_bc1_14_bc2_67_bc3_43	108	5887
	1214-7_bc1_17_bc2_91_bc3_63	4	14	1214-8_bc1_14_bc2_67_bc3_82	105	2317
	1214-7_bc1_17_bc2_91_bc3_70	5	30	1214-8_bc1_14_bc2_68_bc3_55	14	18
	1214-7_bc1_17_bc2_94_bc3_94	62	4881	1214-8_bc1_14_bc2_68_bc3_75	42	52
	1214-7_bc1_17_bc2_95_bc3_57	2	3	1214-8_bc1_14_bc2_68_bc3_91	28	32
	1214-7_bc1_17_bc2_95_bc3_85	13	15	1214-8_bc1_14_bc2_69_bc3_16	16	17
	1214-7_bc1_17_bc2_96_bc3_76	47	58	1214-8_bc1_14_bc2_69_bc3_22	5	7
	1214-7_bc1_18_bc2_1_bc3_29	2	2	1214-8_bc1_14_bc2_69_bc3_37	1	1
	1214-7_bc1_18_bc2_12_bc3_31	13	51	1214-8_bc1_14_bc2_69_bc3_55	29	434
	1214-7_bc1_18_bc2_16_bc3_31	23	30	1214-8_bc1_14_bc2_69_bc3_61	17	18
	1214-7_bc1_18_bc2_16_bc3_6	46	5619	1214-8_bc1_14_bc2_69_bc3_68	38	44
	1214-7_bc1_18_bc2_17_bc3_24	95	8136	1214-8_bc1_14_bc2_7_bc3_65	11	12
	1214-7_bc1_18_bc2_18_bc3_11	2	10	1214-8_bc1_14_bc2_70_bc3_11	5	5
	1214-7_bc1_18_bc2_19_bc3_36	5	15	1214-8_bc1_14_bc2_70_bc3_44	2	3
	1214-7_bc1_18_bc2_2_bc3_51	174	5940	1214-8_bc1_14_bc2_70_bc3_94	15	3101
	1214-7_bc1_18_bc2_2_bc3_93	8	54	1214-8_bc1_14_bc2_71_bc3_23	3	5
	1214-7_bc1_18_bc2_20_bc3_33	20	42	1214-8_bc1_14_bc2_73_bc3_18	3	3
	1214-7_bc1_18_bc2_21_bc3_19	11	34	1214-8_bc1_14_bc2_73_bc3_23	48	5974
	1214-7_bc1_18_bc2_22_bc3_93	2	2	1214-8_bc1_14_bc2_73_bc3_47	11	12
	1214-7_bc1_18_bc2_24_bc3_55	3	12	1214-8_bc1_14_bc2_73_bc3_53	66	73
	1214-7_bc1_18_bc2_24_bc3_57	8	10	1214-8_bc1_14_bc2_73_bc3_65	15	3455
	1214-7_bc1_18_bc2_25_bc3_63	300	13058	1214-8_bc1_14_bc2_73_bc3_77	82	8001
	1214-7_bc1_18_bc2_26_bc3_57	18	22	1214-8_bc1_14_bc2_73_bc3_85	1	1
	1214-7_bc1_18_bc2_28_bc3_67	3	15	1214-8_bc1_14_bc2_73_bc3_95	1	1
	1214-7_bc1_18_bc2_3_bc3_48	3	7	1214-8_bc1_14_bc2_74_bc3_27	107	8835
	1214-7_bc1_18_bc2_30_bc3_75	105	7168	1214-8_bc1_14_bc2_74_bc3_32	7	7
	1214-7_bc1_18_bc2_31_bc3_62	11	36	1214-8_bc1_14_bc2_74_bc3_34	57	2301
	1214-7_bc1_18_bc2_31_bc3_64	68	4983	1214-8_bc1_14_bc2_74_bc3_87	7	8
	1214-7_bc1_18_bc2_32_bc3_43	80	6055	1214-8_bc1_14_bc2_74_bc3_96	7	8
	1214-7_bc1_18_bc2_33_bc3_67	5	5	1214-8_bc1_14_bc2_75_bc3_17	5	9
	1214-7_bc1_18_bc2_36_bc3_30	28	33	1214-8_bc1_14_bc2_75_bc3_59	2	4
	1214-7_bc1_18_bc2_39_bc3_28	5	5	1214-8_bc1_14_bc2_75_bc3_80	118	3554
	1214-7_bc1_18_bc2_39_bc3_5	252	19626	1214-8_bc1_14_bc2_76_bc3_1	3	3
	1214-7_bc1_18_bc2_39_bc3_82	24	26	1214-8_bc1_14_bc2_76_bc3_17	1	1
	1214-7_bc1_18_bc2_40_bc3_60	89	109	1214-8_bc1_14_bc2_76_bc3_25	20	23
	1214-7_bc1_18_bc2_43_bc3_28	4	19	1214-8_bc1_14_bc2_76_bc3_29	640	39059
	1214-7_bc1_18_bc2_44_bc3_2	65	8476	1214-8_bc1_14_bc2_76_bc3_34	9	10
	1214-7_bc1_18_bc2_44_bc3_75	12	65	1214-8_bc1_14_bc2_76_bc3_40	4	5
	1214-7_bc1_18_bc2_44_bc3_76	28	5130	1214-8_bc1_14_bc2_76_bc3_45	4	4
	1214-7_bc1_18_bc2_46_bc3_3	113	9482	1214-8_bc1_14_bc2_76_bc3_65	5	7
	1214-7_bc1_18_bc2_50_bc3_77	1	4	1214-8_bc1_14_bc2_76_bc3_83	3	3
	1214-7_bc1_18_bc2_50_bc3_91	36	102	1214-8_bc1_14_bc2_76_bc3_92	27	29
	1214-7_bc1_18_bc2_53_bc3_58	4	13	1214-8_bc1_14_bc2_77_bc3_31	5	7
	1214-7_bc1_18_bc2_54_bc3_20	13	18	1214-8_bc1_14_bc2_77_bc3_45	12	15
	1214-7_bc1_18_bc2_54_bc3_41	2	7	1214-8_bc1_14_bc2_77_bc3_55	1	5
	1214-7_bc1_18_bc2_54_bc3_77	36	94	1214-8_bc1_14_bc2_77_bc3_59	12	15
	1214-7_bc1_18_bc2_56_bc3_63	22	5654	1214-8_bc1_14_bc2_77_bc3_71	3	3
	1214-7_bc1_18_bc2_57_bc3_43	178	209	1214-8_bc1_14_bc2_77_bc3_72	42	46
	1214-7_bc1_18_bc2_59_bc3_50	28	4496	1214-8_bc1_14_bc2_77_bc3_96	6	7
	1214-7_bc1_18_bc2_59_bc3_51	94	5642	1214-8_bc1_14_bc2_78_bc3_37	12	14
	1214-7_bc1_18_bc2_60_bc3_58	5	9	1214-8_bc1_14_bc2_78_bc3_39	16	17
	1214-7_bc1_18_bc2_61_bc3_19	4	21	1214-8_bc1_14_bc2_8_bc3_95	4	4
	1214-7_bc1_18_bc2_61_bc3_51	9	48	1214-8_bc1_14_bc2_80_bc3_16	2	9
	1214-7_bc1_18_bc2_61_bc3_94	164	13792	1214-8_bc1_14_bc2_80_bc3_32	2	2
	1214-7_bc1_18_bc2_62_bc3_83	2	21	1214-8_bc1_14_bc2_80_bc3_49	30	35
	1214-7_bc1_18_bc2_63_bc3_17	1	5	1214-8_bc1_14_bc2_81_bc3_24	2	2
	1214-7_bc1_18_bc2_64_bc3_19	36	42	1214-8_bc1_14_bc2_81_bc3_43	2	2
	1214-7_bc1_18_bc2_65_bc3_14	13	772	1214-8_bc1_14_bc2_81_bc3_44	1	1
	1214-7_bc1_18_bc2_65_bc3_16	9	17	1214-8_bc1_14_bc2_81_bc3_47	1	1
	1214-7_bc1_18_bc2_65_bc3_66	4	6	1214-8_bc1_14_bc2_81_bc3_58	1	1
	1214-7_bc1_18_bc2_66_bc3_73	30	36	1214-8_bc1_14_bc2_81_bc3_70	1	1
	1214-7_bc1_18_bc2_66_bc3_84	5	9	1214-8_bc1_14_bc2_81_bc3_8	2	3
	1214-7_bc1_18_bc2_66_bc3_85	7	8	1214-8_bc1_14_bc2_81_bc3_86	2	5
	1214-7_bc1_18_bc2_67_bc3_33	5	25	1214-8_bc1_14_bc2_81_bc3_92	819	12464
	1214-7_bc1_18_bc2_67_bc3_62	66	80	1214-8_bc1_14_bc2_81_bc3_93	1	1
	1214-7_bc1_18_bc2_69_bc3_84	46	78	1214-8_bc1_14_bc2_82_bc3_14	9	10
	1214-7_bc1_18_bc2_7_bc3_66	19	22	1214-8_bc1_14_bc2_82_bc3_4	5	5
	1214-7_bc1_18_bc2_71_bc3_46	8	25	1214-8_bc1_14_bc2_84_bc3_11	1	2
	1214-7_bc1_18_bc2_71_bc3_77	101	4936	1214-8_bc1_14_bc2_84_bc3_12	2	2
	1214-7_bc1_18_bc2_72_bc3_37	16	17	1214-8_bc1_14_bc2_84_bc3_14	2	2
	1214-7_bc1_18_bc2_73_bc3_53	134	7939	1214-8_bc1_14_bc2_84_bc3_15	1	1
	1214-7_bc1_18_bc2_74_bc3_22	1	1	1214-8_bc1_14_bc2_84_bc3_16	1	1
	1214-7_bc1_18_bc2_74_bc3_72	23	2279	1214-8_bc1_14_bc2_84_bc3_18	1	1
	1214-7_bc1_18_bc2_75_bc3_60	6	29	1214-8_bc1_14_bc2_84_bc3_19	1	1
	1214-7_bc1_18_bc2_76_bc3_74	10	11	1214-8_bc1_14_bc2_84_bc3_2	3	3
	1214-7_bc1_18_bc2_77_bc3_9	57	190	1214-8_bc1_14_bc2_84_bc3_21	6	8
	1214-7_bc1_18_bc2_8_bc3_96	83	239	1214-8_bc1_14_bc2_84_bc3_23	4	4
	1214-7_bc1_18_bc2_80_bc3_16	65	3851	1214-8_bc1_14_bc2_84_bc3_24	1	1
	1214-7_bc1_18_bc2_83_bc3_5	1	7	1214-8_bc1_14_bc2_84_bc3_25	1	2
	1214-7_bc1_18_bc2_83_bc3_53	4	11	1214-8_bc1_14_bc2_84_bc3_29	1	1
	1214-7_bc1_18_bc2_85_bc3_38	102	2390	1214-8_bc1_14_bc2_84_bc3_3	1	1
	1214-7_bc1_18_bc2_85_bc3_53	2	8	1214-8_bc1_14_bc2_84_bc3_30	1	1
	1214-7_bc1_18_bc2_85_bc3_55	9	14	1214-8_bc1_14_bc2_84_bc3_31	2	2
	1214-7_bc1_18_bc2_85_bc3_90	268	17358	1214-8_bc1_14_bc2_84_bc3_32	1095	35416
	1214-7_bc1_18_bc2_86_bc3_20	10	14	1214-8_bc1_14_bc2_84_bc3_33	2	2
	1214-7_bc1_18_bc2_87_bc3_70	1	1	1214-8_bc1_14_bc2_84_bc3_34	1	1
	1214-7_bc1_18_bc2_87_bc3_89	226	260	1214-8_bc1_14_bc2_84_bc3_35	2	2
	1214-7_bc1_18_bc2_88_bc3_43	184	213	1214-8_bc1_14_bc2_84_bc3_36	3	3
	1214-7_bc1_18_bc2_88_bc3_84	2	2	1214-8_bc1_14_bc2_84_bc3_37	3	4
	1214-7_bc1_18_bc2_90_bc3_60	9	11	1214-8_bc1_14_bc2_84_bc3_40	5	5
	1214-7_bc1_18_bc2_91_bc3_1	94	116	1214-8_bc1_14_bc2_84_bc3_41	3	3
	1214-7_bc1_18_bc2_92_bc3_60	4	9	1214-8_bc1_14_bc2_84_bc3_44	6	6
	1214-7_bc1_18_bc2_92_bc3_61	111	9688	1214-8_bc1_14_bc2_84_bc3_47	1	1
	1214-7_bc1_18_bc2_95_bc3_33	3	3	1214-8_bc1_14_bc2_84_bc3_49	1	1
	1214-7_bc1_18_bc2_95_bc3_90	6	21	1214-8_bc1_14_bc2_84_bc3_51	1	1
	1214-7_bc1_19_bc2_10_bc3_68	43	635	1214-8_bc1_14_bc2_84_bc3_52	1	1
	1214-7_bc1_19_bc2_16_bc3_85	16	35	1214-8_bc1_14_bc2_84_bc3_57	1	1
	1214-7_bc1_19_bc2_2_bc3_70	17	18	1214-8_bc1_14_bc2_84_bc3_6	1	1
	1214-7_bc1_19_bc2_23_bc3_92	1	8	1214-8_bc1_14_bc2_84_bc3_62	1	1
	1214-7_bc1_19_bc2_25_bc3_15	48	51	1214-8_bc1_14_bc2_84_bc3_63	1	1
	1214-7_bc1_19_bc2_26_bc3_58	2	10	1214-8_bc1_14_bc2_84_bc3_64	1	1
	1214-7_bc1_19_bc2_30_bc3_68	4	16	1214-8_bc1_14_bc2_84_bc3_65	2	2
	1214-7_bc1_19_bc2_31_bc3_44	209	14087	1214-8_bc1_14_bc2_84_bc3_68	4	5
	1214-7_bc1_19_bc2_33_bc3_29	8	9	1214-8_bc1_14_bc2_84_bc3_69	1	2
	1214-7_bc1_19_bc2_37_bc3_78	22	28	1214-8_bc1_14_bc2_84_bc3_7	1	1
	1214-7_bc1_19_bc2_39_bc3_28	22	27	1214-8_bc1_14_bc2_84_bc3_70	1	1
	1214-7_bc1_19_bc2_39_bc3_68	332	20752	1214-8_bc1_14_bc2_84_bc3_71	2	3
	1214-7_bc1_19_bc2_39_bc3_88	199	2921	1214-8_bc1_14_bc2_84_bc3_73	2	2
	1214-7_bc1_19_bc2_48_bc3_26	17	17	1214-8_bc1_14_bc2_84_bc3_74	1052	9515
	1214-7_bc1_19_bc2_49_bc3_53	14	15	1214-8_bc1_14_bc2_84_bc3_76	1	1
	1214-7_bc1_19_bc2_50_bc3_2	4	15	1214-8_bc1_14_bc2_84_bc3_77	4	4
	1214-7_bc1_19_bc2_54_bc3_11	1	1	1214-8_bc1_14_bc2_84_bc3_78	1	1
	1214-7_bc1_19_bc2_54_bc3_20	203	3523	1214-8_bc1_14_bc2_84_bc3_8	6	6
	1214-7_bc1_19_bc2_54_bc3_24	1	2	1214-8_bc1_14_bc2_84_bc3_81	3	3
	1214-7_bc1_19_bc2_61_bc3_90	1	2	1214-8_bc1_14_bc2_84_bc3_83	6	6
	1214-7_bc1_19_bc2_65_bc3_16	6	6	1214-8_bc1_14_bc2_84_bc3_85	2	2
	1214-7_bc1_19_bc2_65_bc3_83	97	109	1214-8_bc1_14_bc2_84_bc3_89	2	2
	1214-7_bc1_19_bc2_67_bc3_74	8	8	1214-8_bc1_14_bc2_84_bc3_92	1	1
	1214-7_bc1_19_bc2_67_bc3_80	341	20739	1214-8_bc1_14_bc2_84_bc3_93	1	1
	1214-7_bc1_19_bc2_69_bc3_63	1	4	1214-8_bc1_14_bc2_84_bc3_94	2	2
	1214-7_bc1_19_bc2_69_bc3_94	92	2827	1214-8_bc1_14_bc2_85_bc3_16	3	3
	1214-7_bc1_19_bc2_7_bc3_42	42	1422	1214-8_bc1_14_bc2_85_bc3_31	3	3
	1214-7_bc1_19_bc2_75_bc3_35	36	42	1214-8_bc1_14_bc2_85_bc3_64	3	3
	1214-7_bc1_19_bc2_76_bc3_95	337	11680	1214-8_bc1_14_bc2_86_bc3_15	1	1
	1214-7_bc1_19_bc2_83_bc3_12	1	9	1214-8_bc1_14_bc2_86_bc3_23	3	3
	1214-7_bc1_19_bc2_83_bc3_17	1	1	1214-8_bc1_14_bc2_87_bc3_14	5	16
	1214-7_bc1_19_bc2_83_bc3_76	2	22	1214-8_bc1_14_bc2_87_bc3_19	4	4
	1214-7_bc1_19_bc2_87_bc3_30	38	42	1214-8_bc1_14_bc2_87_bc3_34	1	2
	1214-7_bc1_19_bc2_87_bc3_68	148	180	1214-8_bc1_14_bc2_87_bc3_35	5	5
	1214-7_bc1_19_bc2_88_bc3_10	3	10	1214-8_bc1_14_bc2_87_bc3_50	58	2543
	1214-7_bc1_19_bc2_89_bc3_86	1	4	1214-8_bc1_14_bc2_87_bc3_68	8	8
	1214-7_bc1_19_bc2_95_bc3_14	17	21	1214-8_bc1_14_bc2_88_bc3_23	2	4
	1214-7_bc1_19_bc2_95_bc3_16	6	8	1214-8_bc1_14_bc2_88_bc3_30	3	3
	1214-7_bc1_19_bc2_95_bc3_28	819	64539	1214-8_bc1_14_bc2_88_bc3_36	3	3
	1214-7_bc1_19_bc2_95_bc3_32	6	7	1214-8_bc1_14_bc2_88_bc3_39	282	5311
	1214-7_bc1_19_bc2_95_bc3_43	22	1598	1214-8_bc1_14_bc2_88_bc3_42	156	2710
	1214-7_bc1_19_bc2_95_bc3_84	7	10	1214-8_bc1_14_bc2_88_bc3_45	1	1
	1214-7_bc1_19_bc2_96_bc3_72	79	5842	1214-8_bc1_14_bc2_88_bc3_48	26	29
	1214-7_bc1_19_bc2_96_bc3_88	62	6478	1214-8_bc1_14_bc2_88_bc3_59	9	24
	1214-7_bc1_2_bc2_13_bc3_10	5	22	1214-8_bc1_14_bc2_88_bc3_6	5	2594
	1214-7_bc1_2_bc2_13_bc3_23	484	13330	1214-8_bc1_14_bc2_88_bc3_68	1	1
	1214-7_bc1_2_bc2_13_bc3_33	3	4	1214-8_bc1_14_bc2_88_bc3_70	7	7
	1214-7_bc1_2_bc2_13_bc3_85	2	9	1214-8_bc1_14_bc2_88_bc3_77	5	5
	1214-7_bc1_2_bc2_14_bc3_52	4	4	1214-8_bc1_14_bc2_89_bc3_30	2	2
	1214-7_bc1_2_bc2_15_bc3_89	9	36	1214-8_bc1_14_bc2_89_bc3_40	1	1
	1214-7_bc1_2_bc2_15_bc3_96	5	7	1214-8_bc1_14_bc2_89_bc3_77	21	21
	1214-7_bc1_2_bc2_16_bc3_6	36	4269	1214-8_bc1_14_bc2_89_bc3_80	10	10
	1214-7_bc1_2_bc2_17_bc3_21	37	43	1214-8_bc1_14_bc2_89_bc3_94	323	528
	1214-7_bc1_2_bc2_18_bc3_38	4	8	1214-8_bc1_14_bc2_9_bc3_75	61	70
	1214-7_bc1_2_bc2_19_bc3_16	335	22228	1214-8_bc1_14_bc2_90_bc3_4	1	1
	1214-7_bc1_2_bc2_19_bc3_57	128	2922	1214-8_bc1_14_bc2_90_bc3_41	16	17
	1214-7_bc1_2_bc2_19_bc3_78	5	5	1214-8_bc1_14_bc2_90_bc3_42	5	19
	1214-7_bc1_2_bc2_19_bc3_93	3	4	1214-8_bc1_14_bc2_90_bc3_43	17	18
	1214-7_bc1_2_bc2_20_bc3_17	3	3	1214-8_bc1_14_bc2_90_bc3_54	3	3
	1214-7_bc1_2_bc2_20_bc3_36	6	22	1214-8_bc1_14_bc2_90_bc3_8	57	3588
	1214-7_bc1_2_bc2_22_bc3_36	2	5	1214-8_bc1_14_bc2_90_bc3_90	6	16
	1214-7_bc1_2_bc2_23_bc3_70	1	7	1214-8_bc1_14_bc2_91_bc3_13	13	14
	1214-7_bc1_2_bc2_25_bc3_75	5	18	1214-8_bc1_14_bc2_91_bc3_28	23	27
	1214-7_bc1_2_bc2_26_bc3_59	5	5	1214-8_bc1_14_bc2_91_bc3_32	4	4
	1214-7_bc1_2_bc2_27_bc3_29	4	8	1214-8_bc1_14_bc2_91_bc3_37	66	79
	1214-7_bc1_2_bc2_27_bc3_75	6	36	1214-8_bc1_14_bc2_91_bc3_79	38	123
	1214-7_bc1_2_bc2_28_bc3_32	2	4	1214-8_bc1_14_bc2_92_bc3_73	2	2
	1214-7_bc1_2_bc2_28_bc3_45	2	13	1214-8_bc1_14_bc2_92_bc3_9	55	64
	1214-7_bc1_2_bc2_28_bc3_5	191	277	1214-8_bc1_14_bc2_93_bc3_15	2	2
	1214-7_bc1_2_bc2_28_bc3_94	3	3	1214-8_bc1_14_bc2_93_bc3_34	14	16
	1214-7_bc1_2_bc2_33_bc3_14	8	13	1214-8_bc1_14_bc2_94_bc3_56	9	9
	1214-7_bc1_2_bc2_33_bc3_30	3	3	1214-8_bc1_14_bc2_95_bc3_42	1	1
	1214-7_bc1_2_bc2_33_bc3_39	3	3	1214-8_bc1_14_bc2_95_bc3_59	5	24
	1214-7_bc1_2_bc2_33_bc3_53	3	15	1214-8_bc1_15_bc2_1_bc3_70	6	7
	1214-7_bc1_2_bc2_33_bc3_64	1	1	1214-8_bc1_15_bc2_1_bc3_90	15	23
	1214-7_bc1_2_bc2_33_bc3_66	585	26246	1214-8_bc1_15_bc2_10_bc3_49	187	222
	1214-7_bc1_2_bc2_33_bc3_67	47	59	1214-8_bc1_15_bc2_10_bc3_79	16	20
	1214-7_bc1_2_bc2_33_bc3_80	2	2	1214-8_bc1_15_bc2_11_bc3_29	1	1
	1214-7_bc1_2_bc2_33_bc3_82	3	3	1214-8_bc1_15_bc2_12_bc3_34	78	89
	1214-7_bc1_2_bc2_35_bc3_44	55	291	1214-8_bc1_15_bc2_12_bc3_95	12	12
	1214-7_bc1_2_bc2_39_bc3_28	14	16	1214-8_bc1_15_bc2_13_bc3_54	79	2602
	1214-7_bc1_2_bc2_39_bc3_68	5	5	1214-8_bc1_15_bc2_13_bc3_6	15	17
	1214-7_bc1_2_bc2_39_bc3_88	3	6	1214-8_bc1_15_bc2_13_bc3_72	42	4216
	1214-7_bc1_2_bc2_40_bc3_11	8	9	1214-8_bc1_15_bc2_13_bc3_89	6	6
	1214-7_bc1_2_bc2_40_bc3_40	8	52	1214-8_bc1_15_bc2_13_bc3_92	13	1701
	1214-7_bc1_2_bc2_42_bc3_74	60	2338	1214-8_bc1_15_bc2_14_bc3_32	9	31
	1214-7_bc1_2_bc2_43_bc3_2	2	2	1214-8_bc1_15_bc2_14_bc3_39	15	16
	1214-7_bc1_2_bc2_43_bc3_4	334	8405	1214-8_bc1_15_bc2_14_bc3_5	2	2
	1214-7_bc1_2_bc2_45_bc3_84	25	30	1214-8_bc1_15_bc2_14_bc3_72	4	4
	1214-7_bc1_2_bc2_48_bc3_70	3	7	1214-8_bc1_15_bc2_15_bc3_11	2	2
	1214-7_bc1_2_bc2_49_bc3_1	2	2	1214-8_bc1_15_bc2_15_bc3_15	2	2
	1214-7_bc1_2_bc2_52_bc3_42	6	35	1214-8_bc1_15_bc2_15_bc3_19	2	2
	1214-7_bc1_2_bc2_52_bc3_76	247	5259	1214-8_bc1_15_bc2_15_bc3_2	1	2
	1214-7_bc1_2_bc2_53_bc3_5	13	14	1214-8_bc1_15_bc2_15_bc3_21	6	6
	1214-7_bc1_2_bc2_54_bc3_57	2	8	1214-8_bc1_15_bc2_15_bc3_22	4	4
	1214-7_bc1_2_bc2_55_bc3_85	153	10485	1214-8_bc1_15_bc2_15_bc3_3	1	2
	1214-7_bc1_2_bc2_56_bc3_12	1	1	1214-8_bc1_15_bc2_15_bc3_34	1	2
	1214-7_bc1_2_bc2_56_bc3_13	112	131	1214-8_bc1_15_bc2_15_bc3_35	4	5
	1214-7_bc1_2_bc2_56_bc3_48	3	6	1214-8_bc1_15_bc2_15_bc3_37	2	2
	1214-7_bc1_2_bc2_56_bc3_61	1	1	1214-8_bc1_15_bc2_15_bc3_43	123	1492
	1214-7_bc1_2_bc2_56_bc3_80	242	282	1214-8_bc1_15_bc2_15_bc3_52	427	24903
	1214-7_bc1_2_bc2_57_bc3_22	4	16	1214-8_bc1_15_bc2_15_bc3_55	349	12424
	1214-7_bc1_2_bc2_57_bc3_66	7	12	1214-8_bc1_15_bc2_15_bc3_61	6	7
	1214-7_bc1_2_bc2_58_bc3_16	5	5	1214-8_bc1_15_bc2_15_bc3_65	3	3
	1214-7_bc1_2_bc2_58_bc3_20	1	1	1214-8_bc1_15_bc2_15_bc3_70	2	2
	1214-7_bc1_2_bc2_58_bc3_22	9	20	1214-8_bc1_15_bc2_15_bc3_73	2	3
	1214-7_bc1_2_bc2_58_bc3_35	2	3	1214-8_bc1_15_bc2_15_bc3_74	3	3
	1214-7_bc1_2_bc2_58_bc3_37	650	29838	1214-8_bc1_15_bc2_15_bc3_79	5	5
	1214-7_bc1_2_bc2_58_bc3_47	5	5	1214-8_bc1_15_bc2_15_bc3_80	3	3
	1214-7_bc1_2_bc2_58_bc3_55	10	14	1214-8_bc1_15_bc2_15_bc3_86	4	4
	1214-7_bc1_2_bc2_58_bc3_84	3	3	1214-8_bc1_15_bc2_15_bc3_92	3	3
	1214-7_bc1_2_bc2_58_bc3_90	2	4	1214-8_bc1_15_bc2_15_bc3_93	1	1
	1214-7_bc1_2_bc2_58_bc3_95	2	2	1214-8_bc1_15_bc2_15_bc3_95	4	5
	1214-7_bc1_2_bc2_60_bc3_43	5	40	1214-8_bc1_15_bc2_15_bc3_96	1	1
	1214-7_bc1_2_bc2_60_bc3_6	69	8490	1214-8_bc1_15_bc2_16_bc3_47	119	7465
	1214-7_bc1_2_bc2_60_bc3_81	4	8	1214-8_bc1_15_bc2_16_bc3_8	5	7
	1214-7_bc1_2_bc2_61_bc3_37	2	2	1214-8_bc1_15_bc2_17_bc3_70	22	1314
	1214-7_bc1_2_bc2_61_bc3_40	17	19	1214-8_bc1_15_bc2_17_bc3_96	40	1880
	1214-7_bc1_2_bc2_61_bc3_57	1	1	1214-8_bc1_15_bc2_18_bc3_1	16	19
	1214-7_bc1_2_bc2_61_bc3_60	1	1	1214-8_bc1_15_bc2_18_bc3_16	16	18
	1214-7_bc1_2_bc2_61_bc3_61	242	266	1214-8_bc1_15_bc2_18_bc3_19	43	49
	1214-7_bc1_2_bc2_61_bc3_92	23	37	1214-8_bc1_15_bc2_18_bc3_30	103	7246
	1214-7_bc1_2_bc2_62_bc3_67	3	19	1214-8_bc1_15_bc2_18_bc3_7	5	8
	1214-7_bc1_2_bc2_63_bc3_20	5	20	1214-8_bc1_15_bc2_18_bc3_83	15	15
	1214-7_bc1_2_bc2_63_bc3_35	5	27	1214-8_bc1_15_bc2_18_bc3_88	2	5
	1214-7_bc1_2_bc2_63_bc3_36	9	30	1214-8_bc1_15_bc2_19_bc3_12	4	4
	1214-7_bc1_2_bc2_63_bc3_58	2	14	1214-8_bc1_15_bc2_19_bc3_73	14	17
	1214-7_bc1_2_bc2_63_bc3_72	3	7	1214-8_bc1_15_bc2_2_bc3_56	43	4966
	1214-7_bc1_2_bc2_63_bc3_73	289	4304	1214-8_bc1_15_bc2_2_bc3_75	2	2
	1214-7_bc1_2_bc2_64_bc3_16	3	3	1214-8_bc1_15_bc2_20_bc3_42	24	27
	1214-7_bc1_2_bc2_64_bc3_19	4	4	1214-8_bc1_15_bc2_20_bc3_56	12	13
	1214-7_bc1_2_bc2_64_bc3_22	21	23	1214-8_bc1_15_bc2_23_bc3_26	11	23
	1214-7_bc1_2_bc2_65_bc3_14	13	14	1214-8_bc1_15_bc2_23_bc3_35	10	12
	1214-7_bc1_2_bc2_65_bc3_16	84	102	1214-8_bc1_15_bc2_23_bc3_40	13	14
	1214-7_bc1_2_bc2_65_bc3_32	6	8	1214-8_bc1_15_bc2_24_bc3_3	3	3
	1214-7_bc1_2_bc2_65_bc3_40	2	2	1214-8_bc1_15_bc2_24_bc3_75	16	19
	1214-7_bc1_2_bc2_65_bc3_45	9	10	1214-8_bc1_15_bc2_25_bc3_13	5	8
	1214-7_bc1_2_bc2_65_bc3_59	6	7	1214-8_bc1_15_bc2_26_bc3_3	3	4
	1214-7_bc1_2_bc2_65_bc3_66	897	67885	1214-8_bc1_15_bc2_27_bc3_46	14	14
	1214-7_bc1_2_bc2_65_bc3_67	4	6	1214-8_bc1_15_bc2_3_bc3_13	16	17
	1214-7_bc1_2_bc2_65_bc3_78	4	4	1214-8_bc1_15_bc2_3_bc3_51	21	22
	1214-7_bc1_2_bc2_65_bc3_82	9	11	1214-8_bc1_15_bc2_3_bc3_61	35	1411
	1214-7_bc1_2_bc2_65_bc3_90	4	4	1214-8_bc1_15_bc2_30_bc3_3	24	1579
	1214-7_bc1_2_bc2_66_bc3_24	1	1	1214-8_bc1_15_bc2_30_bc3_31	94	1947
	1214-7_bc1_2_bc2_66_bc3_61	15	19	1214-8_bc1_15_bc2_30_bc3_61	51	3247
	1214-7_bc1_2_bc2_66_bc3_73	13	16	1214-8_bc1_15_bc2_31_bc3_92	80	1112
	1214-7_bc1_2_bc2_67_bc3_64	24	4198	1214-8_bc1_15_bc2_32_bc3_36	12	13
	1214-7_bc1_2_bc2_67_bc3_78	1	4	1214-8_bc1_15_bc2_32_bc3_96	66	4481
	1214-7_bc1_2_bc2_67_bc3_79	201	7763	1214-8_bc1_15_bc2_33_bc3_13	5	5
	1214-7_bc1_2_bc2_67_bc3_80	13	16	1214-8_bc1_15_bc2_33_bc3_30	2	3
	1214-7_bc1_2_bc2_69_bc3_80	17	17	1214-8_bc1_15_bc2_33_bc3_34	101	1375
	1214-7_bc1_2_bc2_69_bc3_84	6	7	1214-8_bc1_15_bc2_33_bc3_44	12	13
	1214-7_bc1_2_bc2_69_bc3_86	3	19	1214-8_bc1_15_bc2_34_bc3_41	17	23
	1214-7_bc1_2_bc2_70_bc3_63	159	12131	1214-8_bc1_15_bc2_34_bc3_55	4	4
	1214-7_bc1_2_bc2_70_bc3_65	16	89	1214-8_bc1_15_bc2_34_bc3_73	67	2702
	1214-7_bc1_2_bc2_71_bc3_1	32	42	1214-8_bc1_15_bc2_34_bc3_78	6	6
	1214-7_bc1_2_bc2_71_bc3_77	1	2	1214-8_bc1_15_bc2_35_bc3_26	6	6
	1214-7_bc1_2_bc2_73_bc3_55	58	67	1214-8_bc1_15_bc2_35_bc3_44	5	5
	1214-7_bc1_2_bc2_73_bc3_80	24	48	1214-8_bc1_15_bc2_37_bc3_59	12	26
	1214-7_bc1_2_bc2_74_bc3_59	29	35	1214-8_bc1_15_bc2_37_bc3_65	25	1146
	1214-7_bc1_2_bc2_75_bc3_77	9	57	1214-8_bc1_15_bc2_37_bc3_70	2	2
	1214-7_bc1_2_bc2_77_bc3_65	1	1	1214-8_bc1_15_bc2_37_bc3_71	66	4361
	1214-7_bc1_2_bc2_77_bc3_93	8	46	1214-8_bc1_15_bc2_37_bc3_73	4	8
	1214-7_bc1_2_bc2_8_bc3_20	5	5	1214-8_bc1_15_bc2_37_bc3_87	291	18754
	1214-7_bc1_2_bc2_8_bc3_31	3	26	1214-8_bc1_15_bc2_38_bc3_63	72	137
	1214-7_bc1_2_bc2_8_bc3_66	10	14	1214-8_bc1_15_bc2_39_bc3_90	2	2
	1214-7_bc1_2_bc2_80_bc3_1	15	1355	1214-8_bc1_15_bc2_4_bc3_58	33	804
	1214-7_bc1_2_bc2_80_bc3_16	246	21067	1214-8_bc1_15_bc2_41_bc3_29	33	35
	1214-7_bc1_2_bc2_80_bc3_67	151	16644	1214-8_bc1_15_bc2_41_bc3_3	2	2
	1214-7_bc1_2_bc2_80_bc3_86	4	4	1214-8_bc1_15_bc2_43_bc3_4	5	7
	1214-7_bc1_2_bc2_81_bc3_55	194	5089	1214-8_bc1_15_bc2_43_bc3_90	2	2
	1214-7_bc1_2_bc2_83_bc3_26	2	4	1214-8_bc1_15_bc2_44_bc3_25	76	2242
	1214-7_bc1_2_bc2_86_bc3_35	6	29	1214-8_bc1_15_bc2_44_bc3_35	96	2395
	1214-7_bc1_2_bc2_88_bc3_84	7	8	1214-8_bc1_15_bc2_46_bc3_60	14	15
	1214-7_bc1_2_bc2_89_bc3_23	1	1	1214-8_bc1_15_bc2_47_bc3_29	10	11
	1214-7_bc1_2_bc2_90_bc3_66	49	66	1214-8_bc1_15_bc2_48_bc3_16	405	14770
	1214-7_bc1_2_bc2_91_bc3_67	2	10	1214-8_bc1_15_bc2_48_bc3_7	6	6
	1214-7_bc1_2_bc2_93_bc3_69	8	48	1214-8_bc1_15_bc2_49_bc3_21	2	2
	1214-7_bc1_2_bc2_95_bc3_14	515	5776	1214-8_bc1_15_bc2_49_bc3_71	9	13
	1214-7_bc1_2_bc2_95_bc3_28	25	50	1214-8_bc1_15_bc2_50_bc3_82	2	4
	1214-7_bc1_2_bc2_95_bc3_31	3	4	1214-8_bc1_15_bc2_50_bc3_84	6	11
	1214-7_bc1_2_bc2_95_bc3_33	3	4	1214-8_bc1_15_bc2_51_bc3_37	13	13
	1214-7_bc1_2_bc2_95_bc3_67	2	2	1214-8_bc1_15_bc2_51_bc3_9	76	5410
	1214-7_bc1_2_bc2_95_bc3_72	1	1	1214-8_bc1_15_bc2_51_bc3_93	34	37
	1214-7_bc1_2_bc2_95_bc3_77	4	4	1214-8_bc1_15_bc2_52_bc3_23	2	2
	1214-7_bc1_20_bc2_10_bc3_80	24	27	1214-8_bc1_15_bc2_52_bc3_76	4	4
	1214-7_bc1_20_bc2_11_bc3_18	1	1	1214-8_bc1_15_bc2_53_bc3_11	65	8371
	1214-7_bc1_20_bc2_11_bc3_39	1	1	1214-8_bc1_15_bc2_53_bc3_66	7	11
	1214-7_bc1_20_bc2_11_bc3_59	428	8728	1214-8_bc1_15_bc2_53_bc3_75	3	3
	1214-7_bc1_20_bc2_11_bc3_90	2	2	1214-8_bc1_15_bc2_54_bc3_23	1	1
	1214-7_bc1_20_bc2_13_bc3_2	109	117	1214-8_bc1_15_bc2_54_bc3_28	83	85
	1214-7_bc1_20_bc2_15_bc3_96	2	2	1214-8_bc1_15_bc2_54_bc3_39	1	1
	1214-7_bc1_20_bc2_16_bc3_55	228	259	1214-8_bc1_15_bc2_54_bc3_45	5	5
	1214-7_bc1_20_bc2_17_bc3_94	28	32	1214-8_bc1_15_bc2_54_bc3_5	1	3
	1214-7_bc1_20_bc2_18_bc3_21	4	5	1214-8_bc1_15_bc2_54_bc3_75	117	128
	1214-7_bc1_20_bc2_20_bc3_67	1	8	1214-8_bc1_15_bc2_54_bc3_78	1	1
	1214-7_bc1_20_bc2_21_bc3_27	22	29	1214-8_bc1_15_bc2_54_bc3_89	6	6
	1214-7_bc1_20_bc2_21_bc3_71	2	6	1214-8_bc1_15_bc2_56_bc3_36	22	2589
	1214-7_bc1_20_bc2_22_bc3_23	101	10069	1214-8_bc1_15_bc2_57_bc3_34	54	3576
	1214-7_bc1_20_bc2_22_bc3_82	1	4	1214-8_bc1_15_bc2_57_bc3_4	122	6992
	1214-7_bc1_20_bc2_22_bc3_92	1	1	1214-8_bc1_15_bc2_57_bc3_75	1	1
	1214-7_bc1_20_bc2_23_bc3_26	3	3	1214-8_bc1_15_bc2_58_bc3_57	9	10
	1214-7_bc1_20_bc2_26_bc3_60	23	24	1214-8_bc1_15_bc2_58_bc3_95	7	8
	1214-7_bc1_20_bc2_27_bc3_35	1	1	1214-8_bc1_15_bc2_60_bc3_77	4	4
	1214-7_bc1_20_bc2_33_bc3_17	1	1	1214-8_bc1_15_bc2_60_bc3_85	2	2
	1214-7_bc1_20_bc2_33_bc3_67	12	13	1214-8_bc1_15_bc2_61_bc3_26	4	4
	1214-7_bc1_20_bc2_33_bc3_91	5	8	1214-8_bc1_15_bc2_62_bc3_79	33	35
	1214-7_bc1_20_bc2_34_bc3_21	22	27	1214-8_bc1_15_bc2_63_bc3_12	64	1839
	1214-7_bc1_20_bc2_34_bc3_29	1	3	1214-8_bc1_15_bc2_63_bc3_46	15	16
	1214-7_bc1_20_bc2_34_bc3_48	172	530	1214-8_bc1_15_bc2_63_bc3_52	4	4
	1214-7_bc1_20_bc2_34_bc3_54	1	3	1214-8_bc1_15_bc2_63_bc3_57	41	2184
	1214-7_bc1_20_bc2_34_bc3_59	24	25	1214-8_bc1_15_bc2_63_bc3_66	14	14
	1214-7_bc1_20_bc2_34_bc3_80	1	1	1214-8_bc1_15_bc2_63_bc3_84	41	44
	1214-7_bc1_20_bc2_34_bc3_92	211	241	1214-8_bc1_15_bc2_64_bc3_25	10	11
	1214-7_bc1_20_bc2_35_bc3_49	33	41	1214-8_bc1_15_bc2_64_bc3_84	269	36467
	1214-7_bc1_20_bc2_35_bc3_7	13	14	1214-8_bc1_15_bc2_64_bc3_88	4	5
	1214-7_bc1_20_bc2_37_bc3_16	142	244	1214-8_bc1_15_bc2_65_bc3_68	57	64
	1214-7_bc1_20_bc2_37_bc3_20	1	1	1214-8_bc1_15_bc2_65_bc3_82	1	1
	1214-7_bc1_20_bc2_37_bc3_59	5	6	1214-8_bc1_15_bc2_66_bc3_12	3	4
	1214-7_bc1_20_bc2_37_bc3_6	219	18078	1214-8_bc1_15_bc2_66_bc3_18	269	19488
	1214-7_bc1_20_bc2_39_bc3_28	7	7	1214-8_bc1_15_bc2_66_bc3_36	3	3
	1214-7_bc1_20_bc2_39_bc3_44	21	23	1214-8_bc1_15_bc2_66_bc3_48	1	1
	1214-7_bc1_20_bc2_4_bc3_37	1	3	1214-8_bc1_15_bc2_66_bc3_71	1	1
	1214-7_bc1_20_bc2_4_bc3_40	1	2	1214-8_bc1_15_bc2_66_bc3_73	3	3
	1214-7_bc1_20_bc2_4_bc3_95	29	31	1214-8_bc1_15_bc2_66_bc3_75	4	4
	1214-7_bc1_20_bc2_40_bc3_66	4	8	1214-8_bc1_15_bc2_66_bc3_78	2	2
	1214-7_bc1_20_bc2_40_bc3_74	30	38	1214-8_bc1_15_bc2_66_bc3_79	555	39148
	1214-7_bc1_20_bc2_40_bc3_91	2	10	1214-8_bc1_15_bc2_66_bc3_85	4	5
	1214-7_bc1_20_bc2_43_bc3_39	122	2608	1214-8_bc1_15_bc2_66_bc3_9	4	4
	1214-7_bc1_20_bc2_46_bc3_70	3	11	1214-8_bc1_15_bc2_67_bc3_19	3	3
	1214-7_bc1_20_bc2_49_bc3_46	2	2	1214-8_bc1_15_bc2_67_bc3_34	2	3
	1214-7_bc1_20_bc2_49_bc3_53	86	96	1214-8_bc1_15_bc2_67_bc3_35	336	21009
	1214-7_bc1_20_bc2_50_bc3_1	30	31	1214-8_bc1_15_bc2_67_bc3_42	1	1
	1214-7_bc1_20_bc2_51_bc3_89	34	44	1214-8_bc1_15_bc2_67_bc3_44	17	19
	1214-7_bc1_20_bc2_55_bc3_43	159	216	1214-8_bc1_15_bc2_67_bc3_86	5	6
	1214-7_bc1_20_bc2_6_bc3_6	4	9	1214-8_bc1_15_bc2_67_bc3_91	13	14
	1214-7_bc1_20_bc2_6_bc3_85	3	16	1214-8_bc1_15_bc2_67_bc3_96	3	3
	1214-7_bc1_20_bc2_6_bc3_86	18	19	1214-8_bc1_15_bc2_68_bc3_53	15	16
	1214-7_bc1_20_bc2_62_bc3_28	2	2	1214-8_bc1_15_bc2_69_bc3_37	6	6
	1214-7_bc1_20_bc2_63_bc3_58	22	25	1214-8_bc1_15_bc2_69_bc3_84	11	36
	1214-7_bc1_20_bc2_64_bc3_29	6	46	1214-8_bc1_15_bc2_69_bc3_85	32	36
	1214-7_bc1_20_bc2_64_bc3_80	33	43	1214-8_bc1_15_bc2_7_bc3_46	54	58
	1214-7_bc1_20_bc2_65_bc3_75	1	1	1214-8_bc1_15_bc2_71_bc3_15	10	10
	1214-7_bc1_20_bc2_66_bc3_22	2	2	1214-8_bc1_15_bc2_71_bc3_20	4	4
	1214-7_bc1_20_bc2_66_bc3_28	223	1670	1214-8_bc1_15_bc2_71_bc3_6	25	4221
	1214-7_bc1_20_bc2_66_bc3_73	15	21	1214-8_bc1_15_bc2_72_bc3_69	30	32
	1214-7_bc1_20_bc2_66_bc3_75	266	369	1214-8_bc1_15_bc2_74_bc3_25	8	28
	1214-7_bc1_20_bc2_66_bc3_8	5	19	1214-8_bc1_15_bc2_74_bc3_70	62	72
	1214-7_bc1_20_bc2_67_bc3_2	29	32	1214-8_bc1_15_bc2_74_bc3_86	15	16
	1214-7_bc1_20_bc2_67_bc3_3	112	2373	1214-8_bc1_15_bc2_74_bc3_96	4	4
	1214-7_bc1_20_bc2_67_bc3_4	1	4	1214-8_bc1_15_bc2_75_bc3_17	7	9
	1214-7_bc1_20_bc2_68_bc3_82	18	20	1214-8_bc1_15_bc2_75_bc3_63	12	16
	1214-7_bc1_20_bc2_69_bc3_84	12	25	1214-8_bc1_15_bc2_75_bc3_78	73	90
	1214-7_bc1_20_bc2_70_bc3_78	9	17	1214-8_bc1_15_bc2_76_bc3_11	2	2
	1214-7_bc1_20_bc2_73_bc3_91	1	5	1214-8_bc1_15_bc2_76_bc3_16	14	16
	1214-7_bc1_20_bc2_74_bc3_59	29	34	1214-8_bc1_15_bc2_76_bc3_25	4	6
	1214-7_bc1_20_bc2_75_bc3_25	25	28	1214-8_bc1_15_bc2_76_bc3_32	3	3
	1214-7_bc1_20_bc2_75_bc3_80	24	26	1214-8_bc1_15_bc2_76_bc3_46	10	11
	1214-7_bc1_20_bc2_75_bc3_87	11	15	1214-8_bc1_15_bc2_76_bc3_65	3	3
	1214-7_bc1_20_bc2_76_bc3_41	1	1	1214-8_bc1_15_bc2_76_bc3_69	11	13
	1214-7_bc1_20_bc2_80_bc3_16	130	167	1214-8_bc1_15_bc2_76_bc3_72	2	4
	1214-7_bc1_20_bc2_84_bc3_63	2	78	1214-8_bc1_15_bc2_76_bc3_76	267	29525
	1214-7_bc1_20_bc2_84_bc3_95	1	1	1214-8_bc1_15_bc2_76_bc3_77	8	9
	1214-7_bc1_20_bc2_85_bc3_17	28	30	1214-8_bc1_15_bc2_76_bc3_80	1	2
	1214-7_bc1_20_bc2_85_bc3_60	37	41	1214-8_bc1_15_bc2_77_bc3_31	11	19
	1214-7_bc1_20_bc2_85_bc3_8	1	1	1214-8_bc1_15_bc2_77_bc3_38	23	39
	1214-7_bc1_20_bc2_85_bc3_90	1	1	1214-8_bc1_15_bc2_77_bc3_45	1	1
	1214-7_bc1_20_bc2_88_bc3_46	1	1	1214-8_bc1_15_bc2_77_bc3_66	5	5
	1214-7_bc1_20_bc2_89_bc3_5	5	28	1214-8_bc1_15_bc2_77_bc3_75	2	3
	1214-7_bc1_20_bc2_89_bc3_88	7	14	1214-8_bc1_15_bc2_77_bc3_8	414	33509
	1214-7_bc1_20_bc2_90_bc3_5	192	4521	1214-8_bc1_15_bc2_77_bc3_85	3	4
	1214-7_bc1_20_bc2_90_bc3_60	9	9	1214-8_bc1_15_bc2_77_bc3_89	19	21
	1214-7_bc1_20_bc2_93_bc3_5	20	26	1214-8_bc1_15_bc2_77_bc3_93	15	17
	1214-7_bc1_20_bc2_95_bc3_80	1	1	1214-8_bc1_15_bc2_78_bc3_41	28	30
	1214-7_bc1_20_bc2_96_bc3_25	40	45	1214-8_bc1_15_bc2_78_bc3_66	30	3364
	1214-7_bc1_21_bc2_11_bc3_22	202	225	1214-8_bc1_15_bc2_79_bc3_7	12	15
	1214-7_bc1_21_bc2_12_bc3_86	87	6196	1214-8_bc1_15_bc2_8_bc3_18	16	16
	1214-7_bc1_21_bc2_13_bc3_66	17	18	1214-8_bc1_15_bc2_8_bc3_27	8	8
	1214-7_bc1_21_bc2_23_bc3_44	13	22	1214-8_bc1_15_bc2_8_bc3_44	15	16
	1214-7_bc1_21_bc2_25_bc3_24	1	1	1214-8_bc1_15_bc2_8_bc3_47	26	29
	1214-7_bc1_21_bc2_27_bc3_35	196	11399	1214-8_bc1_15_bc2_80_bc3_6	10	10
	1214-7_bc1_21_bc2_27_bc3_9	2	6	1214-8_bc1_15_bc2_80_bc3_69	20	2366
	1214-7_bc1_21_bc2_28_bc3_89	94	2019	1214-8_bc1_15_bc2_80_bc3_70	32	37
	1214-7_bc1_21_bc2_29_bc3_93	22	24	1214-8_bc1_15_bc2_81_bc3_18	5	6
	1214-7_bc1_21_bc2_33_bc3_67	18	18	1214-8_bc1_15_bc2_81_bc3_35	65	76
	1214-7_bc1_21_bc2_34_bc3_33	5	5	1214-8_bc1_15_bc2_81_bc3_40	3	3
	1214-7_bc1_21_bc2_34_bc3_55	2	6	1214-8_bc1_15_bc2_81_bc3_42	1	1
	1214-7_bc1_21_bc2_35_bc3_95	1	2	1214-8_bc1_15_bc2_81_bc3_46	42	4956
	1214-7_bc1_21_bc2_37_bc3_50	93	109	1214-8_bc1_15_bc2_81_bc3_47	1	1
	1214-7_bc1_21_bc2_39_bc3_28	21	24	1214-8_bc1_15_bc2_81_bc3_73	1	1
	1214-7_bc1_21_bc2_4_bc3_40	3	3	1214-8_bc1_15_bc2_81_bc3_75	1	4
	1214-7_bc1_21_bc2_4_bc3_85	4	4	1214-8_bc1_15_bc2_81_bc3_79	3	3
	1214-7_bc1_21_bc2_40_bc3_74	21	25	1214-8_bc1_15_bc2_81_bc3_94	613	6987
	1214-7_bc1_21_bc2_41_bc3_20	101	115	1214-8_bc1_15_bc2_82_bc3_14	3	9
	1214-7_bc1_21_bc2_43_bc3_55	263	9953	1214-8_bc1_15_bc2_82_bc3_4	6	6
	1214-7_bc1_21_bc2_46_bc3_55	5	9	1214-8_bc1_15_bc2_82_bc3_52	2	2
	1214-7_bc1_21_bc2_53_bc3_48	12	16	1214-8_bc1_15_bc2_82_bc3_91	81	98
	1214-7_bc1_21_bc2_53_bc3_84	23	24	1214-8_bc1_15_bc2_82_bc3_94	4	19
	1214-7_bc1_21_bc2_54_bc3_23	32	34	1214-8_bc1_15_bc2_83_bc3_76	1	1
	1214-7_bc1_21_bc2_54_bc3_75	76	86	1214-8_bc1_15_bc2_84_bc3_32	4	5
	1214-7_bc1_21_bc2_62_bc3_22	82	8000	1214-8_bc1_15_bc2_84_bc3_44	3	5
	1214-7_bc1_21_bc2_63_bc3_32	85	3588	1214-8_bc1_15_bc2_84_bc3_59	18	21
	1214-7_bc1_21_bc2_67_bc3_20	88	100	1214-8_bc1_15_bc2_84_bc3_68	419	13742
	1214-7_bc1_21_bc2_68_bc3_68	85	4535	1214-8_bc1_15_bc2_84_bc3_69	1	1
	1214-7_bc1_21_bc2_69_bc3_94	44	3074	1214-8_bc1_15_bc2_85_bc3_58	15	22
	1214-7_bc1_21_bc2_71_bc3_46	14	25	1214-8_bc1_15_bc2_85_bc3_76	2	4
	1214-7_bc1_21_bc2_71_bc3_67	49	56	1214-8_bc1_15_bc2_86_bc3_11	15	15
	1214-7_bc1_21_bc2_74_bc3_45	34	37	1214-8_bc1_15_bc2_86_bc3_90	14	17
	1214-7_bc1_21_bc2_75_bc3_57	147	173	1214-8_bc1_15_bc2_87_bc3_68	1	1
	1214-7_bc1_21_bc2_76_bc3_68	28	29	1214-8_bc1_15_bc2_88_bc3_13	2	2
	1214-7_bc1_21_bc2_77_bc3_25	26	3718	1214-8_bc1_15_bc2_88_bc3_36	369	12580
	1214-7_bc1_21_bc2_8_bc3_77	8	8	1214-8_bc1_15_bc2_88_bc3_4	1	2
	1214-7_bc1_21_bc2_82_bc3_66	17	18	1214-8_bc1_15_bc2_88_bc3_43	2	2
	1214-7_bc1_21_bc2_83_bc3_14	24	30	1214-8_bc1_15_bc2_89_bc3_18	501	32389
	1214-7_bc1_21_bc2_85_bc3_72	22	27	1214-8_bc1_15_bc2_89_bc3_4	4	5
	1214-7_bc1_21_bc2_86_bc3_7	12	12	1214-8_bc1_15_bc2_90_bc3_4	1	1
	1214-7_bc1_21_bc2_86_bc3_96	35	45	1214-8_bc1_15_bc2_90_bc3_69	93	3798
	1214-7_bc1_21_bc2_87_bc3_37	21	25	1214-8_bc1_15_bc2_91_bc3_5	9	10
	1214-7_bc1_21_bc2_87_bc3_54	133	5970	1214-8_bc1_15_bc2_91_bc3_57	10	12
	1214-7_bc1_21_bc2_87_bc3_82	1	1	1214-8_bc1_15_bc2_91_bc3_7	3	3
	1214-7_bc1_21_bc2_88_bc3_84	18	21	1214-8_bc1_15_bc2_91_bc3_76	102	109
	1214-7_bc1_21_bc2_96_bc3_24	89	1966	1214-8_bc1_15_bc2_91_bc3_88	102	2133
	1214-7_bc1_21_bc2_96_bc3_30	61	71	1214-8_bc1_15_bc2_92_bc3_79	1	4
	1214-7_bc1_22_bc2_1_bc3_39	39	7852	1214-8_bc1_15_bc2_93_bc3_1	12	13
	1214-7_bc1_22_bc2_10_bc3_35	3	9	1214-8_bc1_15_bc2_93_bc3_13	2	7
	1214-7_bc1_22_bc2_10_bc3_75	14	18	1214-8_bc1_15_bc2_93_bc3_57	74	1700
	1214-7_bc1_22_bc2_12_bc3_25	7	32	1214-8_bc1_15_bc2_94_bc3_87	48	1923
	1214-7_bc1_22_bc2_12_bc3_37	192	475	1214-8_bc1_15_bc2_95_bc3_41	104	3958
	1214-7_bc1_22_bc2_12_bc3_57	3	24	1214-8_bc1_15_bc2_95_bc3_42	5	12
	1214-7_bc1_22_bc2_13_bc3_23	21	24	1214-8_bc1_15_bc2_95_bc3_48	5	24
	1214-7_bc1_22_bc2_13_bc3_64	7	61	1214-8_bc1_15_bc2_95_bc3_54	1	1
	1214-7_bc1_22_bc2_15_bc3_34	28	33	1214-8_bc1_16_bc2_11_bc3_52	16	17
	1214-7_bc1_22_bc2_15_bc3_79	58	73	1214-8_bc1_16_bc2_11_bc3_95	14	16
	1214-7_bc1_22_bc2_15_bc3_88	151	227	1214-8_bc1_16_bc2_12_bc3_50	8	9
	1214-7_bc1_22_bc2_15_bc3_96	1	1	1214-8_bc1_16_bc2_13_bc3_49	21	28
	1214-7_bc1_22_bc2_16_bc3_44	27	31	1214-8_bc1_16_bc2_13_bc3_90	3	21
	1214-7_bc1_22_bc2_16_bc3_63	122	149	1214-8_bc1_16_bc2_14_bc3_23	11	171
	1214-7_bc1_22_bc2_18_bc3_22	3	3	1214-8_bc1_16_bc2_14_bc3_72	3	3
	1214-7_bc1_22_bc2_18_bc3_55	293	13740	1214-8_bc1_16_bc2_14_bc3_91	5	10
	1214-7_bc1_22_bc2_20_bc3_67	6	31	1214-8_bc1_16_bc2_15_bc3_11	332	26039
	1214-7_bc1_22_bc2_20_bc3_96	189	14844	1214-8_bc1_16_bc2_15_bc3_12	3	4
	1214-7_bc1_22_bc2_24_bc3_12	4	19	1214-8_bc1_16_bc2_15_bc3_16	7	9
	1214-7_bc1_22_bc2_24_bc3_17	3	3	1214-8_bc1_16_bc2_15_bc3_17	122	7242
	1214-7_bc1_22_bc2_25_bc3_56	17	21	1214-8_bc1_16_bc2_15_bc3_25	2	2
	1214-7_bc1_22_bc2_27_bc3_53	5	5	1214-8_bc1_16_bc2_15_bc3_29	4	7
	1214-7_bc1_22_bc2_27_bc3_72	3	11	1214-8_bc1_16_bc2_15_bc3_30	3	3
	1214-7_bc1_22_bc2_27_bc3_91	17	2265	1214-8_bc1_16_bc2_15_bc3_32	2	2
	1214-7_bc1_22_bc2_28_bc3_32	18	19	1214-8_bc1_16_bc2_15_bc3_40	1	1
	1214-7_bc1_22_bc2_28_bc3_82	33	35	1214-8_bc1_16_bc2_15_bc3_43	2	3
	1214-7_bc1_22_bc2_3_bc3_3	10	11	1214-8_bc1_16_bc2_15_bc3_48	1	1
	1214-7_bc1_22_bc2_30_bc3_15	12	63	1214-8_bc1_16_bc2_15_bc3_52	2	3
	1214-7_bc1_22_bc2_30_bc3_20	9	9	1214-8_bc1_16_bc2_15_bc3_54	2	5
	1214-7_bc1_22_bc2_30_bc3_58	9	10	1214-8_bc1_16_bc2_15_bc3_6	2	2
[truncated: 25,947 more rows]

## Sheet: Figure 3-figure supplement 1B
Data of static E. coli biofilms sample1 and sample2	Gene_ID	Sample1	Sample2				Figure 3-figure supplement 1B. Pearson correlation coefficient
	b0001	1	1				sample estimates: cor=0.96
	b0002	276	1054				p-value < 2.2e-16
	b0003	13	131
	b0004	72	427
	b0005	42	9
	b0006	167	615
	b0007	20	263
	b0008	420	2124
	b0009	166	88
	b0010	47	247
	b0011	8	11
	b0013	2	4
	b0014	10338	23148
	b0015	735	1268
	b0016	201	295
	b0018	6	24
	b0019	2113	5023
	b0020	70	251
	b0021	4	65
	b0022	1	1
	b0023	204	486
	b0024	4	11
	b0025	308	507
	b0026	934	1146
	b0027	92	64
	b0028	6	7
	b0029	9	148
	b0030	136	483
	b0031	105	278
	b0032	146	513
	b0033	323	524
	b0034	16	22
	b0035	10	11
	b0036	9	22
	b0037	187	30
	b0038	141	250
	b0039	175	34
	b0040	18	26
	b0041	60	81
	b0042	15	28
	b0043	9	27
	b0044	2	7
	b0045	13	33
	b0046	1	10
	b0047	113	63
	b0048	3	177
	b0049	15	162
	b0050	143	159
	b0051	123	775
	b0052	201	385
	b0053	442	1095
	b0054	1422	1347
	b0055	4	22
	b0058	18	116
	b0059	331	1130
	b0060	223	544
	b0061	8	20
	b0062	29	216
	b0063	24	243
	b0064	54	103
	b0065	289	348
	b0066	8	13
	b0067	17	38
	b0068	15	167
	b0069	12	186
	b0070	53	30
	b0071	7	10
	b0072	81	146
	b0073	16	19
	b0074	33	289
	b0076	7	13
	b0077	34	91
	b0078	7	13
	b0080	475	1294
	b0081	169	124
	b0082	132	418
	b0083	68	245
	b0084	279	676
	b0085	83	583
	b0086	182	478
	b0087	114	510
	b0088	119	180
	b0089	14	370
	b0090	17	249
	b0091	267	636
	b0092	84	571
	b0093	102	635
	b0094	286	1270
	b0095	935	1388
	b0096	2297	5188
	b0097	161	350
	b0098	246	1763
	b0099	4	13
	b0101	2	5
	b0102	134	306
	b0103	112	130
	b0104	243	396
	b0106	20	22
	b0107	126	70
	b0108	2	2
	b0109	220	220
	b0110	480	553
	b0111	14	202
	b0112	190	28
	b0113	438	1094
	b0114	3148	5428
	b0115	228	1545
	b0116	1543	4366
	b0117	27	38
	b0118	3875	6153
	b0119	120	10
	b0120	624	53
	b0121	22	704
	b0122	3	100
	b0123	80	330
	b0124	370	593
	b0125	125	499
	b0126	140	645
	b0127	177	271
	b0128	12	237
	b0129	391	449
	b0130	14	70
	b0131	100	406
	b0132	7	11
	b0133	350	574
	b0134	220	257
	b0135	9	21
	b0136	15	15
	b0137	9	7
	b0138	2	7
	b0139	20	126
	b0140	4	164
	b0141	7	14
	b0142	9	294
	b0143	295	621
	b0144	7	144
	b0145	369	209
	b0146	19	486
	b0147	4	12
	b0148	183	515
	b0149	198	269
	b0150	137	594
	b0151	9	117
	b0152	95	19
	b0153	57	267
	b0154	180	891
	b0155	202	165
	b0156	83	279
	b0157	21	51
	b0158	193	115
	b0159	289	99
	b0160	109	326
	b0161	253	1221
	b0162	224	151
	b0163	1	116
	b0164	9	58
	b0166	71	375
	b0167	163	360
	b0168	339	574
	b0169	1286	3398
	b0170	568	1524
	b0171	232	263
	b0172	113	542
	b0173	142	280
	b0174	302	28
	b0175	8	287
	b0176	469	803
	b0177	1549	4083
	b0178	14	501
	b0179	588	1080
	b0180	53	251
	b0181	360	330
	b0182	117	20
	b0183	277	121
	b0184	363	807
	b0185	565	485
	b0186	55	548
	b0187	1	7
	b0188	106	156
	b0189	91	167
	b0190	168	387
	b0191	103	236
	b0192	130	229
	b0193	217	14
	b0194	304	957
	b0195	8	36
	b0196	4	85
	b0197	12	133
	b0198	18	192
	b0199	264	119
	b0200	108	82
	b0207	9	127
	b0208	8	64
	b0209	234	224
	b0210	42	210
	b0211	312	916
	b0212	9	106
	b0213	5	145
	b0214	7	15
	b0215	9	550
	b0217	18	24
	b0219	14	293
	b0220	17	234
	b0221	371	638
	b0222	196	606
	b0223	11	156
	b0224	84	832
	b0225	7	421
	b0226	118	637
	b0227	121	20
	b0228	2	9
	b0231	13	182
	b0232	3	4
	b0233	50	88
	b0234	3	136
	b0237	1042	1487
	b0238	10	316
	b0239	174	52
	b0241	8	14
	b0242	123	727
	b0243	165	229
	b0245	2	6
	b0246	5	9
	b0247	7	9
	b0248	5	44
	b0249	5	10
	b0250	2	14
	b0251	3	5
	b0252	153	161
	b0253	11	169
	b0254	4	28
	b0256	49	223
	b0259	2	16
	b0260	8	38
	b0261	11	147
	b0262	18	181
	b0264	6	97
	b0265	1	2
	b0267	12	32
	b0268	141	261
	b0269	38	52
	b0270	17	46
	b0271	111	51
	b0272	12	21
	b0273	17	125
	b0274	2	93
	b0275	1	4
	b0277	3	11
	b0278	79	20
	b0279	6	128
	b0280	7	10
	b0281	280	141
	b0283	8	244
	b0284	211	81
	b0285	31	92
	b0286	5	14
	b0287	8	122
	b0288	1	7
	b0289	10	9
	b0290	84	207
	b0291	25	53
	b0292	8	7
	b0293	8	6
	b0295	8	7
	b0296	2	2
	b0298	6	80
	b0299	85	41
	b0301	14	20
	b0303	4	6
	b0304	5	54
	b0305	8	18
	b0306	7	9
	b0307	15	163
	b0308	12	24
	b0310	7	14
	b0311	230	391
	b0312	143	432
	b0313	212	15
	b0314	22	318
	b0315	10	175
	b0316	85	387
	b0317	10	6
	b0318	1	10
	b0319	2	11
	b0320	24	34
	b0321	18	27
	b0323	11	133
	b0324	140	40
	b0325	170	169
	b0326	117	45
	b0327	4	2
	b0328	16	30
	b0329	173	8
	b0330	8	25
	b0331	8	18
	b0333	59	11
	b0334	24	51
	b0335	17	46
	b0336	13	35
	b0337	93	293
	b0338	7	161
	b0339	9	14
	b0340	1	72
	b0341	28	35
	b0342	3	11
	b0343	95	34
	b0344	33	80
	b0345	20	281
	b0346	435	497
	b0347	17	37
	b0348	9	17
	b0349	23	24
	b0350	7	12
	b0351	12	14
	b0352	8	24
	b0353	40	58
	b0354	20	44
	b0355	9	14
	b0356	162	534
	b0357	378	236
	b0358	7	19
	b0360	61	2
	b0361	26	86
	b0363	16	22
	b0364	1	12
	b0365	13	302
	b0366	9	25
	b0367	12	40
	b0368	8	47
	b0369	219	646
	b0372	95	54
	b0373	3	51
	b0375	8	9
	b0376	160	438
	b0377	175	24
	b0378	338	244
	b0379	9	90
	b0380	17	387
	b0381	318	738
	b0382	6	4
	b0383	17	56
	b0384	101	6
	b0385	21	26
	b0386	118	367
	b0387	171	13
	b0388	91	118
	b0389	260	59
	b0390	29	170
	b0391	3	3
	b0393	130	751
	b0394	15	127
	b0396	507	92
	b0397	181	86
	b0398	142	356
	b0399	100	38
	b0400	33	166
	b0401	617	875
	b0402	324	36
	b0403	33	354
	b0404	103	123
	b0405	24	788
	b0406	705	790
	b0407	76	638
	b0408	541	1109
	b0409	340	402
	b0410	4	7
	b0411	551	835
	b0412	11	5
	b0413	479	326
	b0414	38	383
	b0415	235	721
	b0416	179	500
	b0417	153	234
	b0418	233	262
	b0419	192	462
	b0420	532	956
	b0421	411	415
	b0422	125	455
	b0423	171	395
	b0424	6	15
	b0425	9	281
	b0426	14	160
	b0427	16	38
	b0428	122	702
	b0429	12	229
	b0430	34	256
	b0431	2042	3145
	b0432	1967	3255
	b0433	127	363
	b0434	257	152
	b0435	258	416
	b0436	1426	1127
	b0437	19	754
	b0438	1038	1420
	b0439	1711	2075
	b0440	319	1008
	b0441	341	1159
	b0443	3	8
	b0444	6	14
	b0445	76	382
	b0446	6	27
	b0447	110	693
	b0448	247	634
	b0449	287	427
	b0450	4	14
	b0451	109	70
	b0452	124	341
	b0453	5	125
	b0454	7	13
	b0456	8	124
	b0457	117	314
	b0458	609	466
	b0459	13	143
	b0460	145	499
	b0461	261	740
	b0462	313	1113
	b0463	589	713
	b0464	8	237
	b0465	428	481
	b0466	2	7
	b0467	97	16
	b0468	5	252
	b0469	10	455
	b0470	156	286
	b0471	174	298
	b0472	10	293
	b0473	2463	5860
	b0474	8	417
	b0475	13	121
	b0476	7	104
	b0477	268	340
	b0478	40	141
	b0479	16	451
	b0480	77	302
	b0481	46	10
	b0482	346	55
	b0483	219	142
	b0484	351	247
	b0485	14	209
	b0486	361	300
	b0487	6	373
	b0488	11	102
	b0489	215	202
	b0490	9	87
	b0491	14	13
	b0492	93	568
	b0493	6	44
	b0494	13	550
	b0495	112	213
	b0496	231	54
	b0497	66	385
	b0498	1	8
	b0503	151	286
	b0504	29	28
	b0505	4	7
	b0506	22	294
	b0507	31	57
	b0508	12	27
	b0509	12	8
	b0511	11	37
	b0512	12	191
	b0513	18	41
	b0514	26	49
	b0515	9	138
	b0516	8	29
	b0517	8	41
	b0518	22	43
	b0520	9	14
	b0521	7	16
	b0522	20	172
	b0523	3	176
	b0524	11	12
	b0525	411	283
	b0526	290	506
	b0527	6	8
	b0528	3	10
	b0529	278	70
	b0530	4	13
	b0531	4	15
	b0532	361	716
	b0533	3	12
	b0534	9	14
	b0535	5	12
	b0537	14	674
	b0540	4	55
	b0541	90	55
	b0543	2	10
	b0544	11	31
	b0545	97	11
	b0546	242	139
	b0547	11	11
	b0549	5	6
	b0550	10	21
	b0551	3	24
	b0552	3	19
	b0554	3	95
	b0555	4	6
	b0556	1	8
	b0557	127	169
	b0559	3	3
	b0560	6	135
	b0564	16	104
	b0565	134	15
	b0566	7	28
	b0567	4	134
	b0568	27	43
	b0569	495	454
	b0570	18	34
	b0571	16	74
	b0572	11	22
	b0573	5	8
	b0574	19	51
	b0575	100	118
	b0576	134	356
	b0577	178	257
	b0578	7	42
	b0579	3	15
	b0580	19	121
	b0581	17	24
	b0582	232	264
	b0583	4	14
	b0584	28	46
	b0585	23	27
	b0586	544	116
	b0587	9	29
	b0588	3	51
	b0589	40	490
	b0590	85	23
	b0591	19	42
	b0592	25	26
	b0593	15	20
	b0594	167	38
	b0595	12	15
	b0596	5	19
	b0597	4	12
	b0598	840	2136
	b0599	13	383
	b0600	11	202
	b0601	8	121
	b0602	14	115
	b0603	6	12
	b0604	9	15
	b0605	991	2879
	b0606	239	445
	b0607	208	992
	b0608	102	27
	b0610	6	61
	b0611	116	312
	b0612	198	22
	b0613	38	50
	b0614	9	12
	b0615	16	99
	b0616	122	163
	b0617	10	7
	b0618	17	21
	b0619	13	211
	b0620	1	7
	b0621	13	26
	b0622	6	18
	b0623	1982	7448
	b0624	128	15
	b0627	177	459
	b0628	296	903
	b0629	9	147
	b0630	144	293
	b0631	146	840
	b0632	238	1119
	b0633	128	242
	b0634	245	232
	b0635	539	174
	b0636	151	327
	b0637	305	131
	b0638	6	12
	b0639	117	16
	b0640	106	44
	b0641	1409	2270
	b0642	1879	2799
	b0643	461	618
	b0644	262	169
	b0645	5	8
	b0646	127	40
	b0647	4	13
	b0648	17	21
	b0649	22	22
	b0650	23	374
	b0651	330	634
	b0652	14	173
	b0653	47	19
	b0654	10	252
	b0655	354	1162
	b0656	3	22
	b0657	23	412
	b0658	448	610
	b0659	227	481
	b0660	729	1095
	b0661	723	945
	b0662	120	581
	b0674	31	781
	b0675	9	393
	b0676	146	463
	b0677	323	293
	b0678	306	29
	b0679	270	878
	b0680	237	1161
	b0681	13	36
	b0682	4	110
	b0683	521	552
	b0684	180	947
	b0685	6	205
	b0686	4	15
	b0687	75	515
	b0688	484	758
	b0689	7	6
	b0692	15	95
	b0693	24	41
	b0694	12	150
	b0695	121	468
	b0696	15	14
	b0697	50	152
	b0698	19	294
	b0699	207	481
	b0700	153	399
	b0702	1	4
	b0704	9	14
	b0706	3	17
	b0707	4	21
	b0708	145	125
	b0709	18	33
	b0710	69	226
	b0711	7	201
	b0712	22	51
	b0713	103	164
	b0714	37	145
	b0715	26	50
	b0716	9	14
	b0717	7	118
	b0718	31	132
	b0719	4	10
	b0720	1328	2765
	b0721	1306	3171
	b0722	743	588
	b0723	2638	5255
	b0724	235	665
	b0726	1351	3446
	b0727	613	1694
	b0728	999	2245
	b0729	269	984
	b0730	8	157
	b0731	14	39
	b0732	20	167
	b0733	6033	13818
	b0734	2206	3682
	b0735	13	18
	b0736	272	59
	b0737	129	589
	b0738	88	10
	b0739	120	271
	b0740	361	1376
	b0741	378	440
	b0742	114	357
	b0750	116	39
	b0751	13	62
	b0752	28	154
	b0753	4	91
	b0754	284	223
	b0755	1059	757
	b0756	402	599
	b0757	401	490
	b0758	196	207
	b0759	94	634
	b0760	198	32
	b0761	297	238
	b0762	59	6
	b0763	7	255
	b0764	13	153
	b0765	8	25
	b0766	6	108
	b0767	155	145
	b0768	11	15
	b0769	6	17
	b0770	13	20
	b0771	30	59
	b0772	28	217
	b0773	15	36
	b0774	333	507
	b0775	93	55
	b0776	13	174
	b0777	10	145
	b0778	11	41
	b0779	461	806
	b0780	18	280
	b0781	249	524
	b0782	193	297
	b0783	13	111
	b0784	112	121
	b0785	9	160
	b0786	8	321
	b0787	12	19
	b0788	13	23
	b0789	87	124
	b0790	18	18
	b0791	170	363
	b0792	10	159
	b0793	19	155
	b0794	163	478
	b0795	195	607
	b0796	235	297
	b0797	16	76
	b0798	91	9
	b0799	136	150
	b0800	17	287
	b0801	8	28
	b0802	1	19
	b0803	13	9
	b0804	6	13
	b0805	215	85
	b0806	1	4
	b0807	30	22
	b0808	27	48
	b0809	5	128
	b0810	272	432
	b0811	405	1572
	b0812	1301	3226
	b0813	8	16
	b0814	714	2452
	b0815	119	246
	b0817	134	261
	b0818	333	219
	b0819	322	643
	b0820	461	617
	b0821	20	82
	b0822	93	12
	b0823	135	204
	b0824	223	189
	b0825	218	419
	b0826	82	21
	b0827	41	479
	b0828	59	65
	b0829	16	450
	b0830	129	181
	b0831	15	15
	b0832	10	17
	b0833	158	357
	b0834	11	20
	b0835	230	425
	b0836	10244	25212
	b0837	448	1428
	b0838	138	30
	b0839	25	434
	b0840	11	245
	b0841	11	102
	b0842	16	232
	b0843	111	7
	b0844	15	11
	b0845	11	66
	b0846	2	7
	b0847	223	781
	b0848	6	6
	b0849	3	2
	b0850	148	140
	b0851	305	190
	b0852	25	120
	b0853	12	15
	b0854	12	31
	b0855	131	15
	b0856	8	84
	b0857	16	25
	b0858	3	7
	b0859	10	109
	b0860	7	20
	b0861	6	5
	b0862	12	117
	b0863	176	447
	b0864	113	361
	b0865	87	317
	b0866	8	392
	b0867	50	214
	b0868	2	22
	b0869	263	129
	b0870	13	154
	b0871	109	263
	b0872	17	43
	b0873	29	55
	b0874	27	43
	b0875	7	165
	b0876	20	142
	b0877	335	1945
	b0878	13	154
	b0879	62	220
	b0880	93	278
	b0881	112	180
	b0882	1072	1673
	b0884	756	1397
	b0885	22	10
	b0886	394	236
	b0887	626	790
	b0888	324	960
	b0889	6	209
	b0890	829	758
	b0891	222	455
	b0892	20	42
	b0893	1055	2382
	b0894	932	2005
	b0895	104	184
	b0896	127	586
	b0897	226	232
	b0898	191	30
	b0899	12	43
	b0900	83	120
	b0901	6	11
	b0902	443	259
	b0903	4883	9218
	b0904	832	1824
	b0905	12	98
	b0906	5	148
	b0907	356	74
	b0908	89	160
	b0909	9	177
	b0910	349	1165
	b0911	5331	9409
	b0912	190	214
	b0913	147	38
	b0914	707	1465
	b0915	172	114
	b0916	19	28
	b0917	83	437
	b0918	258	780
	b0919	325	130
	b0920	13	297
	b0921	164	335
	b0922	66	25
	b0923	190	127
	b0924	463	364
	b0925	14	201
	b0926	358	795
	b0927	29	434
	b0928	1010	2285
	b0929	975	1723
	b0930	642	790
	b0931	205	364
	b0932	595	789
	b0933	11	87
	b0934	7	34
	b0935	68	186
	b0936	8	14
	b0937	5	9
	b0938	146	15
	b0939	10	288
	b0940	27	69
	b0941	17	31
	b0942	6	10
	b0943	7	113
	b0944	11	17
	b0945	68	313
	b0946	2	68
	b0947	432	202
	b0948	190	643
	b0949	14	275
	b0950	15	30
	b0951	57	232
	b0952	14	16
	b0953	1637	4034
	b0954	774	259
	b0955	411	622
	b0956	195	99
	b0957	2634	6178
	b0958	5	187
	b0959	111	14
	b0960	156	320
	b0961	217	126
	b0962	161	368
	b0963	96	174
	b0964	121	48
	b0965	292	12
	b0966	262	250
	b0967	242	391
	b0968	2	25
	b0969	1	106
	b0970	1572	2830
	b0972	323	43
	b0973	19	138
	b0974	111	19
	b0975	12	92
	b0976	9	24
	b0977	99	158
	b0978	27	54
	b0979	11	344
	b0980	15	43
	b0981	36	151
	b0982	2	11
	b0983	3	17
	b0984	24	34
	b0985	8	98
	b0986	19	9
	b0987	113	132
	b0988	2	102
	b0989	8	12
	b0990	2	8
	b0992	9	13
	b0993	18	211
	b0994	9	17
	b0995	62	234
	b0996	10	105
	b0997	28	60
	b0998	3	20
	b0999	50	194
	b1000	9	117
	b1001	9	149
	b1002	473	1938
	b1003	258	737
	b1004	1996	3604
	b1006	16	50
	b1007	13	16
	b1008	3	11
	b1009	13	173
	b1010	6	11
	b1011	3	20
	b1012	15	17
	b1013	11	23
	b1014	351	649
	b1015	37	966
	b1018	122	27
	b1019	17	35
	b1020	16	536
	b1021	7	13
	b1022	13	153
	b1023	22	45
	b1024	100	41
	b1025	34	181
	b1026	89	36
	b1027	3	70
	b1029	26	39
	b1033	103	119
	b1034	245	508
	b1035	122	56
	b1036	8	5
	b1037	9	13
	b1038	5	7
	b1040	10	16
	b1041	8	4
	b1042	7	6
	b1043	4	3
	b1044	94	7
	b1045	76	165
	b1046	132	164
	b1047	118	12
	b1048	1176	3215
	b1049	235	979
	b1050	3	8
	b1051	134	521
	b1053	272	252
	b1054	115	476
	b1055	23	862
	b1056	5	6
	b1057	128	11
	b1058	3	4
	b1059	212	258
	b1060	91	121
	b1062	103	84
	b1063	99	126
	b1064	195	677
	b1065	10	103
	b1066	6	251
	b1067	237	13
	b1068	151	130
	b1069	227	295
	b1070	5	3
	b1071	1	4
	b1072	4	11
	b1074	29	24
	b1075	14	124
	b1076	158	32
	b1077	65	37
	b1078	2	53
	b1079	7	16
	b1080	13	17
	b1081	9	14
	b1082	90	58
	b1083	9	137
	b1084	1397	2740
	b1085	151	441
	b1086	110	674
	b1087	7	158
	b1088	681	1558
	b1089	242	362
	b1090	267	132
	b1091	387	718
	b1092	463	381
	b1093	624	1579
	b1094	296	1550
	b1095	636	799
	b1096	7	150
	b1097	91	400
	b1098	13	628
	b1099	9	125
	b1100	156	23
	b1101	606	1357
	b1102	20	26
	b1103	117	150
	b1104	1	54
	b1105	315	252
	b1106	70	148
	b1107	332	833
	b1108	241	462
	b1109	755	565
	b1110	143	279
	b1111	186	310
	b1112	357	162
	b1113	106	29
	b1114	470	840
	b1115	11	24
	b1116	301	441
	b1117	104	54
	b1118	202	498
	b1119	301	206
	b1120	138	31
	b1121	4	7
	b1122	9	14
	b1123	311	514
	b1124	34	306
	b1125	177	356
	b1126	27	685
	b1127	331	685
	b1128	329	427
	b1129	115	413
	b1130	239	610
	b1131	363	482
	b1132	18	362
	b1133	434	1455
	b1134	64	192
	b1135	24	239
	b1136	1072	2673
	b1137	16	112
	b1138	149	332
	b1139	6	15
	b1140	14	20
	b1141	2	5
	b1143	3	121
	b1144	4	8
	b1145	106	172
	b1147	3	42
	b1148	4	11
	b1150	9	10
	b1153	6	14
	b1154	6	12
	b1155	3	12
	b1156	6	15
	b1158	6	15
	b1159	9	15
	b1160	2	1
	b1161	2	7
	b1162	7	100
	b1163	9	82
	b1164	5	138
	b1165	29	12
	b1166	9	44
	b1168	141	113
	b1171	3	146
	b1172	2	3
	b1174	5	73
	b1175	662	682
	b1176	10	362
	b1177	98	5
	b1178	17	332
	b1179	113	290
	b1180	123	431
	b1181	3	92
	b1182	10	17
	b1183	2	5
	b1184	13	42
	b1185	4	194
	b1186	49	796
	b1187	97	745
	b1188	445	278
	b1189	675	1633
	b1190	171	598
	b1191	299	600
	b1192	69	15
	b1193	5	117
	b1194	10	20
	b1195	5	100
	b1196	7	11
	b1197	33	86
	b1198	168	34
	b1199	7	120
	b1200	79	22
	b1201	15	318
	b1202	45	63
	b1203	757	1036
	b1204	185	196
	b1205	2267	4113
	b1206	308	369
	b1207	1392	2602
	b1208	1053	2034
	b1209	14	167
	b1210	436	446
	b1211	462	209
	b1212	9	20
	b1213	6	224
	b1214	42	572
	b1215	251	793
	b1216	19	115
	b1218	53	43
	b1219	11	440
	b1220	29	24
	b1221	229	278
	b1222	18	37
	b1223	21	34
	b1224	605	1193
	b1225	13	67
	b1226	60	156
	b1227	105	95
	b1232	158	484
	b1233	200	489
	b1234	152	520
	b1235	620	382
	b1236	83	672
	b1237	850	1591
	b1238	4	119
	b1241	3141	6687
	b1242	25	22
	b1243	7113	13412
	b1244	603	1421
	b1245	531	1307
	b1246	394	262
	b1247	388	487
	b1248	4	37
	b1249	285	149
	b1250	12	23
	b1251	205	103
	b1252	7	169
	b1253	56	3
	b1254	133	232
	b1255	404	14
	b1256	2687	5136
	b1257	13	349
	b1258	4	12
	b1259	3	135
	b1260	5	14
	b1261	20	672
	b1262	299	208
	b1263	74	128
	b1264	30	131
	b1266	132	25
	b1267	105	405
	b1268	46	332
	b1269	61	379
	b1270	8	244
	b1271	7	216
	b1272	18	848
	b1273	352	105
	b1274	642	967
	b1275	76	338
	b1276	445	887
	b1277	263	166
	b1278	482	119
	b1279	26	17
	b1280	642	600
	b1281	451	52
	b1282	21	143
	b1283	113	114
	b1284	83	144
	b1285	98	45
	b1286	225	902
	b1287	38	26
	b1288	545	2909
	b1289	4	4
	b1290	3	113
	b1291	113	169
	b1292	10	16
	b1293	88	11
	b1294	212	445
	b1296	27	46
	b1297	102	32
	b1298	17	23
	b1299	299	48
	b1300	6	24
	b1301	23	32
	b1302	15	157
	b1303	10	30
	b1304	895	2283
	b1305	238	395
	b1306	43	534
	b1307	172	243
	b1308	88	4
	b1309	129	22
	b1310	20	26
	b1311	11	12
	b1312	10	135
	b1313	24	23
	b1314	25	48
	b1315	7	18
	b1316	32	59
	b1317	6	9
	b1319	13	15
	b1320	9	30
	b1321	133	470
	b1322	16	21
	b1323	135	208
	b1324	255	1068
	b1325	185	28
	b1326	73	56
	b1327	2	11
	b1328	7	10
	b1329	117	772
	b1330	120	195
	b1331	3	20
	b1332	156	123
	b1333	467	1223
	b1334	329	2116
	b1335	3	12
	b1336	14	62
	b1337	39	19
	b1338	9	20
	b1339	11	118
	b1340	3	12
	b1341	98	261
	b1342	13	34
	b1343	208	34
	b1344	7	270
	b1345	609	311
	b1346	3	1
	b1348	3	7
	b1349	106	9
	b1350	29	262
	b1351	7	14
	b1352	2	6
	b1353	4	5
	b1355	2	2
	b1356	96	960
	b1357	3	9
	b1358	4	8
	b1359	10	17
	b1360	4	13
	b1363	94	629
	b1365	2	4
	b1370	20	279
	b1372	285	72
	b1373	8	9
	b1374	5	9
	b1375	4	3
	b1376	743	2547
	b1377	16	96
	b1378	405	782
	b1379	8	134
	b1380	19	486
	b1381	81	409
	b1382	1	9
	b1384	11	9
	b1385	12	137
	b1386	21	55
	b1387	79	217
	b1388	2	11
	b1389	2	8
	b1390	9	11
	b1391	11	9
	b1392	7	10
	b1393	17	27
	b1394	12	20
	b1395	20	19
	b1396	3	10
	b1397	124	32
	b1398	26	291
	b1399	225	567
	b1400	84	16
	b1402	21	88
	b1403	46	5
	b1404	42	150
	b1406	192	216
	b1407	17	145
	b1408	4	10
	b1409	6	11
	b1410	81	29
	b1411	185	31
	b1412	4	14
	b1413	874	858
	b1414	7	270
	b1415	1900	2827
	b1418	227	413
	b1419	5	271
	b1420	3	102
	b1421	20	93
	b1422	210	550
	b1423	23	51
	b1424	15	35
	b1426	160	1097
	b1427	9	232
	b1428	12	20
	b1429	10	20
	b1430	4	4
	b1431	10	87
	b1432	36	137
	b1433	10	178
	b1434	9	80
	b1435	388	785
	b1436	1	3
	b1438	46	397
	b1439	19	417
	b1440	84	25
	b1441	16	53
	b1442	12	13
	b1443	8	22
	b1444	18	20
	b1445	1	9
	b1446	1	4
	b1447	4	12
	b1448	7	119
	b1449	57	228
	b1450	4	11
	b1451	100	148
	b1452	10	247
	b1453	18	28
	b1454	6	5
	b1455	4	8
	b1457	6	26
	b1460	5	8
	b1461	1	3
	b1462	5	32
	b1463	146	90
	b1464	98	11
	b1465	3	42
	b1466	12	13
	b1467	10	67
	b1468	69	122
	b1469	6	26
	b1473	13	25
	b1474	624	304
	b1475	16	29
	b1476	5	48
	b1477	455	384
	b1478	182	194
	b1479	1005	1642
	b1480	43	17
	b1481	2	130
	b1482	12	17
	b1483	14	18
	b1484	13	22
	b1485	9	34
	b1486	19	46
	b1487	18	137
	b1488	9	15
	b1489	24	37
	b1490	13	15
	b1491	21	26
	b1492	121	183
	b1493	151	316
	b1494	35	56
	b1495	34	54
	b1496	10	20
	b1497	7	21
	b1498	27	48
	b1499	145	15
	b1500	4	3
	b1501	13	22
	b1502	14	16
	b1503	6	136
	b1504	4	12
	b1507	16	117
	b1508	68	3
	b1511	174	156
	b1512	10	256
	b1513	169	422
	b1514	13	209
	b1515	4	15
	b1516	122	17
	b1517	284	193
	b1518	5	140
	b1519	10	162
	b1520	5	19
	b1521	79	866
	b1522	7	20
	b1523	123	267
	b1524	122	22
	b1525	23	132
	b1526	5	164
	b1527	9	25
	b1528	13	141
	b1529	15	234
	b1530	16	515
	b1531	145	776
	b1532	36	127
	b1533	72	136
	b1534	9	194
	b1535	31	102
	b1537	2	14
	b1538	22	595
	b1539	316	506
	b1540	427	374
	b1541	249	152
	b1542	17	15
	b1545	12	8
	b1546	6	3
	b1547	9	15
	b1549	5	4
	b1550	14	230
	b1551	1	6
	b1552	1	5
	b1553	1	2
	b1554	5	76
	b1555	1	3
	b1556	2	3
	b1557	2	10
	b1558	6	128
	b1559	16	18
	b1560	8	11
	b1561	1	4
	b1562	2	3
	b1563	158	270
	b1564	298	910
	b1565	7	11
	b1566	6	15
	b1569	1	11
	b1570	8	177
	b1571	3	5
	b1573	142	7
	b1575	1	1
	b1576	1	1
	b1580	4	143
	b1581	50	58
	b1582	8	283
	b1583	147	126
	b1584	149	212
	b1585	4	6
	b1586	90	13
	b1587	561	552
	b1588	575	1061
	b1589	8	9
	b1590	9	141
	b1591	11	404
	b1592	62	327
	b1593	242	124
	b1594	514	677
	b1595	10	98
	b1596	17	161
	b1597	8	7
	b1598	192	286
	b1599	10	147
	b1600	108	445
	b1601	114	628
	b1602	106	372
	b1603	329	790
	b1604	206	440
	b1605	168	109
	b1606	36	152
	b1607	191	40
	b1608	222	131
	b1609	11	118
	b1610	123	198
	b1611	20	696
	b1612	1526	3437
	b1613	296	625
	b1614	261	344
	b1615	16	25
	b1616	21	48
	b1617	21	164
	b1618	7	199
	b1619	17	285
	b1620	276	725
	b1621	1581	2842
	b1622	97	497
	b1623	396	690
	b1624	150	362
	b1625	1	3
	b1626	205	134
	b1627	195	15
	b1628	4	7
	b1629	29	498
	b1630	29	16
	b1631	6	9
	b1632	7	8
	b1633	4	10
	b1634	161	1311
	b1635	4	189
	b1636	131	73
	b1637	415	1324
	b1638	154	427
	b1639	4	122
	b1640	23	71
	b1641	438	1496
	b1642	5	124
	b1643	64	232
	b1644	23	20
	b1645	41	128
	b1646	28	109
	b1647	8	324
	b1648	2	4
	b1649	123	14
	b1650	38	375
	b1651	142	119
	b1652	37	137
	b1653	63	318
	b1654	143	138
	b1655	137	126
	b1656	462	1042
	b1657	151	59
	b1658	174	643
	b1659	11	144
	b1660	130	483
	b1661	705	992
	b1662	8	133
	b1663	20	144
	b1664	399	532
	b1667	14	21
	b1668	21	210
	b1669	6	14
	b1670	5	11
	b1671	3	262
	b1672	152	14
	b1673	21	108
	b1674	8	21
	b1675	4	4
	b1676	312	906
	b1677	1572	3132
	b1678	9	127
	b1679	4	7
	b1680	111	38
	b1681	15	98
	b1682	130	22
	b1683	259	242
	b1684	47	6
	b1685	319	1292
	b1686	5	109
	b1687	159	544
	b1688	210	300
	b1689	1	5
	b1690	10	16
	b1691	7	17
	b1692	7	16
	b1693	7	12
	b1694	10	235
	b1695	7	17
	b1696	4	16
	b1697	9	29
	b1698	11	15
	b1699	11	29
	b1700	4	5
	b1701	19	33
	b1702	1977	2902
	b1703	38	198
	b1704	110	21
	b1705	1	4
	b1706	86	97
	b1707	8	286
	b1708	6	108
	b1709	15	104
	b1710	7	118
	b1711	79	174
	b1712	245	311
	b1713	735	1708
	b1714	294	919
	b1715	2	4
	b1716	887	4037
	b1717	535	551
	b1718	1106	2380
	b1719	2282	7111
	b1722	9	12
	b1723	20	14
	b1724	5	138
	b1725	337	1234
	b1726	5	312
	b1727	2	135
	b1728	2	13
	b1729	103	129
	b1730	4	18
	b1731	8	5
	b1732	480	439
	b1733	9	13
	b1734	10	199
	b1735	167	14
	b1736	1	54
	b1737	29	151
	b1738	2	22
	b1739	5	265
	b1740	10	18
	b1741	131	324
	b1742	9	14
	b1743	2	9
	b1744	243	58
	b1745	41	34
	b1746	16	26
	b1747	12	113
	b1748	23	29
	b1749	414	328
	b1750	87	98
	b1751	12	117
	b1752	13	13
	b1753	8	7
	b1754	107	124
	b1755	15	35
	b1756	4	16
	b1757	458	26
	b1758	162	192
	b1759	48	7
	b1760	3	8
	b1761	17	454
	b1762	13	26
	b1763	73	122
	b1764	247	428
	b1765	164	11
	b1766	188	297
	b1767	104	238
	b1768	10	128
	b1769	15	66
	b1770	6	108
	b1771	7	14
	b1772	12	19
	b1773	7	14
	b1774	9	22
	b1775	13	224
	b1776	11	183
	b1777	306	878
	b1778	1793	2574
	b1779	3392	10719
	b1780	41	327
	b1781	18	41
	b1782	9	554
	b1783	187	635
	b1784	18	60
	b1785	28	36
	b1786	141	386
	b1787	3	3
	b1788	6	6
	b1789	97	19
	b1790	15	103
	b1791	23	32
	b1792	6	9
	b1793	2	88
	b1794	227	312
	b1795	7	103
	b1796	6	11
	b1797	2	5
	b1798	6	147
	b1799	135	24
	b1800	15	31
	b1801	102	102
	b1802	26	37
	b1803	5	11
	b1804	3	16
	b1805	27	313
	b1806	256	301
	b1807	273	564
	b1808	142	312
	b1809	7	5
	b1810	88	12
	b1812	60	167
	b1813	1	9
	b1814	784	1945
	b1815	27	39
	b1816	243	619
	b1817	384	1044
	b1818	214	988
	b1819	372	585
	b1820	4	78
	b1821	109	207
	b1822	12	17
	b1823	149	160
	b1824	2292	5146
	b1825	85	12
	b1826	144	88
	b1827	21	399
	b1828	336	77
	b1829	620	1290
	b1830	593	519
	b1831	218	409
	b1832	13	642
	b1833	137	18
	b1834	249	135
	b1835	183	298
	b1836	533	7
	b1837	1	3
	b1838	3	7
	b1839	12	32
	b1840	71	319
	b1841	156	169
	b1842	2	6
	b1843	6	16
	b1844	13	150
	b1845	719	723
	b1846	22	17
	b1847	4	9
	b1848	128	180
	b1849	52	282
	b1850	10	14
	b1851	163	521
	b1852	391	659
	b1853	468	285
	b1854	1172	1704
	b1855	8	97
	b1856	306	1349
	b1857	16	731
	b1858	596	588
	b1859	38	138
	b1860	217	310
	b1861	126	17
	b1862	9	12
	b1863	7	134
	b1864	329	904
	b1865	224	191
	b1866	3114	5766
	b1867	30	203
	b1868	8	125
	b1869	90	187
	b1870	140	163
	b1871	88	25
	b1872	22	50
	b1873	11	22
	b1874	174	162
	b1875	112	11
	b1876	361	1219
	b1877	4	13
	b1878	4	3
	b1879	41	80
	b1880	16	35
	b1881	5	8
	b1882	5	7
	b1883	11	15
	b1884	10	54
	b1885	37	49
	b1886	215	39
	b1887	4	8
	b1888	13	91
	b1889	106	9
	b1890	258	114
	b1891	6	12
	b1892	5	78
	b1893	2	63
	b1895	4	55
	b1896	120	107
	b1897	54	27
	b1900	26	30
	b1901	48	71
	b1902	116	6
	b1904	5	7
	b1905	163	523
	b1907	210	162
	b1908	210	467
	b1912	84	688
	b1913	20	430
	b1914	8	449
	b1915	3	2
	b1916	125	13
	b1917	48	80
	b1918	7	9
	b1919	8	288
	b1920	94	1157
	b1921	8	17
	b1922	2	7
	b1923	822	1083
	b1924	11	199
	b1925	3	7
	b1926	4	6
	b1927	53	44
	b1928	6	11
	b1929	431	1127
	b1930	13	80
	b1931	28	50
	b1932	9	10
	b1938	21	168
	b1939	14	118
	b1940	10	6
	b1941	31	188
	b1942	7	8
	b1943	21	20
	b1944	6	15
	b1945	14	25
	b1946	4	4
	b1948	3	17
	b1950	6	14
	b1951	12	15
	b1952	7	1
	b1953	3	144
	b1955	361	363
	b1956	176	129
	b1957	140	100
	b1958	94	64
	b1959	11	19
	b1960	11	139
	b1961	335	375
	b1962	93	15
	b1963	3	11
	b1967	152	178
	b1968	17	342
	b1969	6	294
	b1970	4	8
	b1971	13	138
	b1972	6	119
	b1973	2	113
	b1974	3	9
	b1976	98	294
	b1978	73	795
	b1981	111	175
	b1982	16	631
	b1983	344	540
	b1985	139	243
	b1987	5	20
	b1988	154	22
	b1990	22	571
	b1991	95	32
	b1992	2	115
	b1993	5	7
	b1994	1	3
	b1996	38	93
	b1997	38	3
	b2000	55	325
	b2001	18	143
	b2002	4	4
	b2003	1	7
	b2004	2	6
	b2005	3	10
	b2007	306	210
	b2008	9	54
	b2009	15	127
	b2010	10	26
	b2011	166	399
	b2012	4	96
	b2013	18	123
	b2014	306	376
	b2015	308	148
	b2016	350	406
	b2017	167	538
	b2019	9	140
	b2020	27	127
	b2021	26	18
	b2022	89	442
	b2023	8	126
	b2024	17	16
	b2025	13	149
	b2026	8	11
	b2027	187	584
	b2028	9	14
	b2029	706	1218
	b2030	5	21
	b2032	18	51
	b2033	3	7
	b2034	12	251
	b2035	97	24
	b2036	11	42
	b2037	12	262
	b2039	13	129
	b2040	101	192
	b2041	96	584
	b2042	298	11
	b2043	15	117
	b2044	18	72
	b2045	28	16
	b2046	27	31
	b2047	17	190
	b2048	14	31
	b2049	15	38
	b2050	9	25
	b2051	5	9
	b2052	16	120
	b2053	7	23
	b2054	6	8
	b2055	7	12
	b2056	33	33
	b2057	10	24
	b2058	7	12
	b2059	9	11
	b2060	26	35
	b2061	4	14
	b2062	25	54
	b2063	350	176
	b2064	366	198
	b2065	20	802
	b2066	10	450
	b2067	88	684
	b2068	6	154
	b2069	11	28
	b2070	21	40
	b2071	3	6
	b2072	6	16
	b2073	10	130
	b2074	20	138
	b2075	66	258
	b2076	45	88
	b2077	18	242
	b2078	22	32
	b2079	5	15
	b2080	139	264
	b2081	168	660
	b2082	2	2
	b2085	3	103
	b2086	171	21
	b2088	4	40
	b2089	106	44
	b2091	4611	6413
	b2093	3162	6156
	b2094	3616	6618
	b2095	15032	29194
	b2096	18647	33125
	b2097	271	710
	b2098	55	25
	b2099	11	130
	b2100	15	22
	b2101	16	172
	b2102	6	17
	b2103	13	152
	b2104	15	37
	b2105	6	193
	b2106	6	10
	b2107	11	368
	b2108	8	22
	b2109	34	126
	b2110	2	9
	b2111	72	50
	b2112	2	5
	b2113	398	696
	b2114	619	1872
	b2118	50	251
	b2119	14	26
	b2120	114	45
	b2121	10	35
	b2123	4	179
	b2124	80	145
	b2125	87	376
	b2126	188	315
	b2127	89	123
	b2128	5	14
	b2129	14	16
	b2130	23	38
	b2131	8	15
	b2132	234	668
	b2133	526	428
	b2134	160	289
	b2135	73	406
	b2136	12	180
	b2137	8	109
	b2140	8	22
	b2141	5	7
	b2142	125	10
	b2143	22	333
	b2144	7	25
	b2145	5	5
	b2146	262	1088
	b2147	566	220
	b2148	18	134
	b2149	468	812
	b2150	1308	1425
	b2151	233	819
	b2152	140	329
	b2153	186	891
	b2154	16	461
	b2155	269	105
	b2156	324	168
	b2157	100	133
	b2158	103	630
	b2159	6	10
	b2160	77	33
	b2161	39	58
	b2162	8	20
	b2163	1	11
	b2164	18	61
	b2165	8	21
	b2166	11	51
	b2167	35	44
	b2168	16	124
	b2169	107	413
	b2170	12	15
	b2171	6	201
	b2172	527	1119
	b2173	11	296
	b2174	5	114
	b2175	519	2037
	b2176	99	172
	b2177	118	31
	b2178	8	21
	b2179	19	160
	b2180	18	257
	b2181	104	346
	b2182	11	29
	b2183	94	393
	b2184	54	455
	b2185	709	1826
	b2186	159	952
	b2187	3	7
	b2188	205	743
	b2192	2	22
	b2193	113	274
	b2194	6	118
	b2195	4	6
	b2196	38	193
	b2197	9	7
	b2198	1	6
	b2199	156	243
	b2200	4	13
	b2201	4	9
	b2202	65	141
	b2203	3	5
	b2204	6	23
	b2205	16	188
	b2206	217	219
	b2207	7	9
	b2208	28	11
	b2209	6	31
	b2210	17	47
	b2211	23	163
	b2212	27	38
	b2213	115	14
[truncated: 2,063 more rows]
