# Supplementary material for: An improved bacterial single-cell RNA-seq reveals biofilm heterogeneity
Source: eLife. 2024 Dec 17;13:RP97543. doi: 10.7554/eLife.97543 (PMC11651652; doi:10.7554/eLife.97543)
Supplement: Figure 4—source data 1. [file elife-97543-fig4-data1.xls]

## Sheet: Figure 4D
BFP		PdeI-BFP		PdeI(G412S)-BFP			Figure 4D. Two-tailed unpaired t test
High	Low	High	Low	High	Low			P value	P value summary
7.71123	6.55851	57.2267	45.116	5.72857	6.48493		BFP High vs Low	0.0755	ns
16.0106	43.2691	48.7342	26.9389	15.7731	0.240236		PdeI-BFP High vs Low	<0.0001	****
3.53004	23.2526	51.4749	22.8844	1.78213	46.4768		PdeI(G412S)-BFP High vs Low	0.7401	ns
1.06817	23.9157	60.5059	33.0994	0.271705	22.8248
16.0214	20.0864	48.4592	34.7817	5.66275	34.4271
6.35226	14.5669	50.6233	58.3522	8.91969	17.3713
15.8551	17.0969	48.5183	64.3505	1.92347	6.79157
14.6988	11.2094	43.4824	43.4407	9.9873	2.32816
11.7767	11.643	38.3002	45.4074	24.115	3.41229
1.65461	8.9162	60.2473	41.8703	12.194	5.86262
1.83765	3.76297	62.6609	37.5641	10.4969	1.34492
4.82536	2.89005	60.136	35.1127	1.78663	1.44167
4.45759	2.19553	57.5187	28.5653	2.5471	20.6669
3.47927	1.86704	54.6659	23.9629	5.4099	2.72716
1.90863	2.04536	54.6992	24.5949	1.78805	2.3215
2.44235	3.90847	59.2343	25.5288	8.46269	1.88795
0.0831146	1.63842	50.4924	24.6324	2.20111	2.17215
0.362165	1.27715	50.716	23.1126	20.2336	2.02575
0.30309	0.999552	53.5555	23.7395	0.204271	26.6189
3.09917	1.16298	68.8247	36.2261	1.69903	12.9943
7.15876	1.2714	64.919	37.8253	10.7906	13.1656
11.1874	0.553434	56.3103	31.0543	2.90871	2.8027
7.83086	0.905117	53.9111	21.4837	1.8428	1.93404
2.61994	1.89127	42.2755	16.5709	4.86594	2.10299
4.17527	5.62264	42.0349	20.3332	3.14439	1.47886
5.54696	2.21304	48.168	38.9735	3.28482	1.26446
6.71264	8.44792	53.0996	42.7657	0.498935	12.5206
4.35886	47.1692	57.9121	40.4208	0.0568421	10.9682
4.00605	40.8096	57.7129	34.2893	3.17921	7.36314
4.59884	38.8057	65.6147	30.8026	4.90141	4.84235
6.5925	33.3852	58.8539	27.5063	10.7099	3.30066
6.80258	33.4639	61.8797	31.3802	45.4082	6.0281
14.1439	1.25295	69.8385	34.1486	9.40898	2.7808
8.95818	1.86722	70.2136	46.8529	11.0067	2.86784
9.26613	1.12801	64.0855	56.3606	16.5338	9.04363
9.56115	0.521185	43.2468	42.4452	17.2739	3.35331
15.4748	0.208743	47.744	53.2759	8.00672	4.85749
14.243	1.84065	52.4811	47.483	1.75014	3.06664
18.6357	4.83884	62.4943	38.1321	0.655643	4.97467
16.0084	2.27534	53.4257	48.4551	2.37321	5.82968
13.7892	3.70446	61.4381	60.9036	8.12985	4.5669
6.33381	7.07724	59.894	38.3939	3.56906	11.0036
10.5873	12.3269	50.0732	52.3004	1.19406	12.8754
8.44325	24.1642	58.9655	53.8189	40.2696	4.91237
11.5284	5.86717	56.4477	49.8218	3.0874	2.70124
10.7969	7.38747	53.4595	47.9462	0.90623	9.22477
3.89694	14.3871	45.5909	36.846	3.13894	8.54512
7.38423	24.9689	38.1807	33.6168	16.3829	7.68452
5.99694	23.5246	49.6461	22.8196	15.9967	66.9884
9.48283	33.5286	49.3977	21.2755	14.6493	20.4344
6.08326	29.4485	56.7509	29.4188	22.3717	17.0388
	3.81806	45.6081	28.8853	9.8198	23.8079
	3.00616	46.8801	23.7643	9.46116	5.05095
	4.12163	32.0933	22.5057	5.65393	1.79069
	8.31298	52.9387	26.7818	3.868	2.14977
	11.4126	43.6805	38.7459	4.24558	7.2599
	15.2141	62.6829	41.2189	6.53078	2.62949
	3.17408	60.4419	39.9111	7.7321	32.9381
	15.8202	56.9983	37.5721	6.68226	14.2917
	2.99236	58.3539	47.5344	23.7613	14.2573
	6.29294	60.0173	49.1889	4.30144	7.38139
	3.74962	65.8545	39.0022	3.44368	0.895131
	10.5293	41.053	37.241	5.91187	1.24875
	5.24188	43.1258	23.0459	10.132	3.3503
	7.65728	39.1908	25.4156	14.2872	4.22589
	3.07518	53.5608	25.8063	12.4849	5.1612
	8.69073	54.0258	25.9806	10.9767	2.23376
	6.55095	54.2578	28.8471	7.57786	31.8653
	9.0034	58.3079	27.3866	2.96676	45.987
	16.683	60.8528	33.0459	0.200915	1.16263
	12.6433	60.4852	36.0329	4.47788	0.847496
	7.83596	41.7325	34.5817	4.67068	1.56463
	4.65787	48.546	34.9505	6.27678	3.67714
	5.24736	72.6877	36.8537	19.7532	0.910377
	2.52858	56.4119	36.9388	4.83043	0.697872
	3.55504	60.1056	19.1579	17.2099	0.846686
	8.83037	62.3182	41.8125	17.3482	1.33147
	5.39455	48.9115	28.1419	5.46313	1.85617
	19.4742	46.9397	26.6093	4.20775	2.80178
	23.5343	53.9079	51.5995	9.37864	2.32385
	4.40826	53.6006	35.9399	10.1112	2.89263
		57.9049	44.609	2.46043	3.64286
		25.196	45.1788		26.2323
			38.5106		1.19624
			30.9716		10.5239
			35.941		3.85742
			32.0879
			28.3832
			22.1335
			21.9849
			24.1087
			29.4737
			33.4391
			29.116
			26.9691
			26.4687
			34.5508
			32.4731
			33.0005
			35.8673
			37.39
			26.4017

## Sheet: Figure 4E
	c-di-GMP (pg)	Mean of cell number	c-di-GMP (pg)/cell	c-di-GMP (pg)/cell (log10)		Figure 4E. Two-tailed unpaired t test
Vector	2.55	1.37812e+09	1.85035e-09	-8.73275		P value	0.0062
	1.05	1.37812e+09	7.61909e-10	-9.1181		P value summary	**
	1.4	1.37812e+09	1.01588e-09	-8.99316
pdeI	11.75	1.09428e+09	1.07377e-08	-7.96909
	5.1	1.09428e+09	4.66061e-09	-8.33156
	9.7	1.09428e+09	8.8643e-09	-8.05236

## Sheet: Figure 4F, G
pBAD-BFP					PdeI-BFP
Axis [m]	BFP	syto24	Ratio of BFP/syto24		Axis [m]	BFP	syto24	Ratio of BFP/syto24
0	0.00530023	0.00530023	1.31791		0	0.0455875	-0.405083	-0.112539
1.22902e-06	0.00554592	0.00554592	1.28598		7.57195e-07	0.106832	-0.378057	-0.28258
2.45803e-06	0.00584326	0.00584326	1.23769		1.51439e-06	0.142743	-0.344013	-0.414935
3.68705e-06	0.00625079	0.00625079	1.20057		2.27159e-06	0.247387	-0.289559	-0.854357
4.91606e-06	0.00669579	0.00669579	1.16236		3.02878e-06	0.320854	-0.221851	-1.44626
6.14508e-06	0.00745841	0.00745841	1.17083		3.78598e-06	0.435635	-0.103939	-4.19125
7.37409e-06	0.00783316	0.00783316	1.10978		4.54317e-06	0.638681	0.0352507	18.1183
8.60311e-06	0.00839176	0.00839176	1.07428		5.30037e-06	0.860597	0.24378	3.53022
9.83212e-06	0.00896825	0.00896825	1.03898		6.05756e-06	1.17071	0.520666	2.24849
1.10611e-05	0.0100177	0.0100177	1.03455		6.81476e-06	1.64115	0.919546	1.78474
1.22902e-05	0.0106838	0.0106838	0.978609		7.57195e-06	2.52587	1.66146	1.52027
1.35192e-05	0.0116939	0.0116939	0.940419		8.32915e-06	5.15841	3.08229	1.67357
1.47482e-05	0.0131005	0.0131005	0.928424		9.08634e-06	8.62132	5.87841	1.46661
1.59772e-05	0.0142569	0.0142569	0.898255		9.84354e-06	14.9668	10.8977	1.37339
1.72062e-05	0.0156903	0.0156903	0.879847		1.06007e-05	22.2214	16.9692	1.30951
1.84352e-05	0.0171671	0.0171671	0.845817		1.13579e-05	27.6521	21.8839	1.26358
1.96642e-05	0.0192745	0.0192745	0.837557		1.21151e-05	31.1755	25.1195	1.24109
2.08933e-05	0.021419	0.021419	0.823015		1.28723e-05	32.5514	26.7653	1.21618
2.21223e-05	0.0230709	0.0230709	0.785224		1.36295e-05	32.5405	27.2184	1.19553
2.33513e-05	0.0258309	0.0258309	0.783633		1.43867e-05	31.6098	26.7575	1.18134
2.45803e-05	0.0283226	0.0283226	0.767023		1.51439e-05	30.048	25.7282	1.1679
2.58093e-05	0.0312712	0.0312712	0.755168		1.59011e-05	28.092	24.3167	1.15525
2.70383e-05	0.0345673	0.0345673	0.741736		1.66583e-05	25.9966	22.7195	1.14424
2.82673e-05	0.0384273	0.0384273	0.733509		1.74155e-05	23.5544	20.8468	1.12988
2.94964e-05	0.0425675	0.0425675	0.728382		1.81727e-05	21.382	18.8825	1.13237
3.07254e-05	0.0468881	0.0468881	0.725629		1.89299e-05	19.2234	17.0093	1.13017
3.19544e-05	0.0514549	0.0514549	0.728086		1.96871e-05	17.2205	15.1845	1.13408
3.31834e-05	0.0560535	0.0560535	0.731599		2.04443e-05	16.2177	13.6189	1.19082
3.44124e-05	0.0604152	0.0604152	0.739422		2.12015e-05	14.0437	12.0719	1.16334
3.56414e-05	0.0638846	0.0638846	0.749821		2.19587e-05	12.4594	10.7601	1.15793
3.68705e-05	0.0657934	0.0657934	0.768766		2.27159e-05	11.3645	9.6383	1.1791
3.80995e-05	0.0647614	0.0647614	0.798719		2.3473e-05	10.1557	8.60141	1.18071
3.93285e-05	0.0585028	0.0585028	0.832632		2.42302e-05	9.85079	7.69963	1.27938
4.05575e-05	0.0458837	0.0458837	0.894844		2.49874e-05	8.46431	6.85747	1.23432
4.17865e-05	0.0289112	0.0289112	0.97098		2.57446e-05	7.63619	6.13	1.24571
4.30155e-05	0.0150072	0.0150072	1.03375		2.65018e-05	6.89039	5.41685	1.27203
4.42445e-05	0.00824171	0.00824171	1.00538		2.7259e-05	6.15535	4.83479	1.27314
4.54736e-05	0.00590497	0.00590497	1.02236		2.80162e-05	5.77599	4.33572	1.33219
4.67026e-05	0.00482042	0.00482042	1.07281		2.87734e-05	5.3124	3.91078	1.3584
4.79316e-05	0.00388579	0.00388579	1.05629		2.95306e-05	4.80652	3.5761	1.34407
					3.02878e-05	4.53629	3.19674	1.41904
					3.1045e-05	4.05202	2.87425	1.40976
					3.18022e-05	3.76567	2.59158	1.45304
					3.25594e-05	3.63493	2.34441	1.55046
					3.33166e-05	3.278	2.0941	1.56535
					3.40738e-05	3.04854	1.87645	1.62463
					3.4831e-05	2.8623	1.67787	1.70591
					3.55882e-05	2.68205	1.51381	1.77172
					3.63454e-05	2.44679	1.35259	1.80896
					3.71026e-05	2.2774	1.21202	1.87901
					3.78598e-05	2.19338	1.08404	2.02334
					3.86169e-05	2.00293	0.957761	2.09126
					3.93741e-05	2.45672	0.860025	2.85657
					4.01313e-05	1.90931	0.811256	2.35352
					4.08885e-05	1.6627	0.670321	2.48046
					4.16457e-05	1.60876	0.560719	2.8691
					4.24029e-05	1.48335	0.468734	3.16458
					4.31601e-05	1.35545	0.406902	3.33115
					4.39173e-05	1.32072	0.337835	3.90937
					4.46745e-05	1.27698	0.257533	4.95853
					4.54317e-05	1.1586	0.189433	6.11616
					4.61889e-05	1.1022	0.151726	7.2644

## Sheet: Figure 4J
		Positive			Negative			All					Figure 4J. Two-tailed unpaired t test
BFP	before-killing(CFU/ml)	7000	6000	4000	335000	440000	250000	55000000	34500000000	20500000000		BFP	Multiple comparisons test	P value summary	P value
	after-killing	200	100	100	6000	6500	4500	200000	320000000	335000000			Positive vs Negative	0.1552	ns
	Ratio	0.0285714	0.0166667	0.025	0.0179104	0.0147727	0.018	0.00363636	0.00927536	0.0163415			Positive vs All	0.0934	ns
	Log10 of Ratio	-1.54407	-1.77815	-1.60206	-1.74689	-1.83054	-1.74473	-2.43933	-2.03267	-1.78671
PdeI-BFP	before-killing	200	200	200	11400	6400	8000	58000	38000	52000		PdeI-BFP	Multiple comparisons test	P value summary	P value
	after-killing	10	16	18	28	10	16	62	440	320			Positive vs Negative	****	<0.0001
	Ratio	0.05	0.08	0.09	0.00245614	0.0015625	0.002	0.00106897	0.0115789	0.00615385			Positive vs All	*	0.0185
	Log10 of Ratio	-1.30103	-1.09691	-1.04576	-2.60975	-2.80618	-2.69897	-2.97104	-1.93633	-2.21085
PdeI(G412S)-BFP	before-killing	11500	9500	16500	90000	80000	115000	51500000	46500000	41500000		PdeI(G412S)-BFP	Multiple comparisons test	P value summary	P value
	after-killing	100	200	300	2000	2000	500	450000	700000	550000			Positive vs Negative	0.873	ns
	Ratio	0.00869565	0.0210526	0.0181818	0.0222222	0.025	0.00434783	0.00873786	0.0150538	0.013253			Positive vs All	0.5364	ns
	Log10 of Ratio	-2.0607	-1.67669	-1.74036	-1.65321	-1.60206	-2.36173	-2.05859	-1.82235	-1.87769
