# Supplementary material for: An improved bacterial single-cell RNA-seq reveals biofilm heterogeneity
Source: eLife. 2024 Dec 17;13:RP97543. doi: 10.7554/eLife.97543 (PMC11651652; doi:10.7554/eLife.97543)
Supplement: Supplementary file 1. — Related to RiboD-PETRI library construction. [file elife-97543-supp1.xls]

## Sheet: library Primers
Library construction primers
Name	sequence	modification or describe
TSO	AAGCAGTGGTATCAACGCAGAGTACATrGrG+G	rG,ribonucleic guanines; +G, locked nucleic acid guanine. For template switch
TSO-2	CAGTGGTATCAACGCAGAGTAC	library amplification
R1	WCCTCCTACGCCAGAs	sample quality checking
R2	WGGTCCTTGGCTTCGC	sample quality checking
R3	ATACACGACGCTCTTCCGATC	library amplification
universal primer	GCAAGCACCCTAGTCTTGAA	3`Biotin. rRNA probe hybridization
SB80	GCGAAGCCAAGGACCW	Round 3 barcode linker
SB81	GCTTCGCTGCAATCGGACCTCGATTGCA	Round 3 blocking
SB82	WGGTCCTTGGCTTCGC	Round 3 blocking
SB83	STCTGGCGTAGGAGGW	Round 2 barcode linker
SB84	GCCAGASACGTTAGGCAGGACCTAACGT	Round 2 blocking
SB85	WCCTCCTACGCCAGAS	Round 2 blocking
Probe primers
E. coli probe primers		C. crescentus probe primers	S. aureus probe primers
TTCAAGACTAGGGTGCTTGCGGCTCCGAGTAAATTGAAGAGTTTGATCATGGCTC		TTCAAGACTAGGGTGCTTGCGGCTCCGAGTCGATCAAGCGCATAAGGGCTTCTGA	TTCAAGACTAGGGTGCTTGCGGCTCCGAGTAGATTAAGTTATTAAGGGCGCACGG
TTCAAGACTAGGGTGCTTGCGGCTCCGAGTAGATTGAACGCTGGCGGCAGGCCTA		TTCAAGACTAGGGTGCTTGCGGCTCCGAGTCGGATGCCTTGGCATTGAGAGGCGA	TTCAAGACTAGGGTGCTTGCGGCTCCGAGTTGGATGCCTTGGCACTAGAAGCCGA
TTCAAGACTAGGGTGCTTGCGGCTCCGAGTACACATGCAAGTCGAACGGTAACAG		TTCAAGACTAGGGTGCTTGCGGCTCCGAGTTGAAGGACGTGGCACGCTGCGATAA	TTCAAGACTAGGGTGCTTGCGGCTCCGAGTTGAAGGACGTTACTAACGACGATAT
TTCAAGACTAGGGTGCTTGCGGCTCCGAGTGAAGAAGCTTGCTTCTTTGCTGACG		TTCAAGACTAGGGTGCTTGCGGCTCCGAGTGAGCCGGGGAGGCGCGAGCACCCTT	TTCAAGACTAGGGTGCTTGCGGCTCCGAGTGCTTTGGGGAGCTGTAAGTAAGCTT
TTCAAGACTAGGGTGCTTGCGGCTCCGAGTAGTGGCGGACGGGTGAGTAATGTCT		TTCAAGACTAGGGTGCTTGCGGCTCCGAGTTGATCCGGCTATCTCCGAATGGGGA	TTCAAGACTAGGGTGCTTGCGGCTCCGAGTTGATCCAGAGATTTCCGAATGGGGA
TTCAAGACTAGGGTGCTTGCGGCTCCGAGTGGGAAACTGCCTGATGGAGGGGGAT		TTCAAGACTAGGGTGCTTGCGGCTCCGAGTAACCCACCTTTATGGTCACCCGACT	TTCAAGACTAGGGTGCTTGCGGCTCCGAGTAACCCAGCATGAGTTATGTCATGTT
TTCAAGACTAGGGTGCTTGCGGCTCCGAGTAACTACTGGAAACGGTAGCTAATAC		TTCAAGACTAGGGTGCTTGCGGCTCCGAGTTTGTTTCCGCTTCGGCGGAGACGAC	TTCAAGACTAGGGTGCTTGCGGCTCCGAGTATCGATATGTGAATACATAGCATAT
TTCAAGACTAGGGTGCTTGCGGCTCCGAGTCGCATAACGTCGCAAGACCAAAGAG		TTCAAGACTAGGGTGCTTGCGGCTCCGAGTGATCGGTTGATCAGACAAGGTATAA	TTCAAGACTAGGGTGCTTGCGGCTCCGAGTCAGAAGGCACACCCGGAGAACTGAA
TTCAAGACTAGGGTGCTTGCGGCTCCGAGTGGGGACCTTCGGGCCTCTTGCCATC		TTCAAGACTAGGGTGCTTGCGGCTCCGAGTTGACCTGAATACATAGGGTTCATTA	TTCAAGACTAGGGTGCTTGCGGCTCCGAGTACATCTTAGTACCCGGAGGAAGAGA
TTCAAGACTAGGGTGCTTGCGGCTCCGAGTGGATGTGCCCAGATGGGATTAGCTA		TTCAAGACTAGGGTGCTTGCGGCTCCGAGTAGCAAACCCGGGGAACTGAAACATC	TTCAAGACTAGGGTGCTTGCGGCTCCGAGTAAGAAAATTCGATTCCCTTAGTAGC
TTCAAGACTAGGGTGCTTGCGGCTCCGAGTGTAGGTGGGGTAACGGCTCACCTAG		TTCAAGACTAGGGTGCTTGCGGCTCCGAGTTCAGTACCCGGAGGAAAGGACATCA	TTCAAGACTAGGGTGCTTGCGGCTCCGAGTGGCGAGCGAAACGGGAAGAGCCCAA
TTCAAGACTAGGGTGCTTGCGGCTCCGAGTGCGACGATCCCTAGCTGGTCTGAGA		TTCAAGACTAGGGTGCTTGCGGCTCCGAGTACCGAGACTCCCGTAGTAGTGGCGA	TTCAAGACTAGGGTGCTTGCGGCTCCGAGTACCAACAAGCTTGCTTGTTGGGGTT
TTCAAGACTAGGGTGCTTGCGGCTCCGAGTGGATGACCAGCCACACTGGAACTGA		TTCAAGACTAGGGTGCTTGCGGCTCCGAGTGCGAACCGGGACCAGGCCAGTGCTG	TTCAAGACTAGGGTGCTTGCGGCTCCGAGTGTAGGACACTCTATACGGAGTTACA
TTCAAGACTAGGGTGCTTGCGGCTCCGAGTGACACGGTCCAGACTCCTACGGGAG		TTCAAGACTAGGGTGCTTGCGGCTCCGAGTTCGTGACATAAAGCTGAATGTGTTG	TTCAAGACTAGGGTGCTTGCGGCTCCGAGTAAGGACGACATTAGACGAATCATCT
TTCAAGACTAGGGTGCTTGCGGCTCCGAGTGCAGCAGTGGGGAATATTGCACAAT		TTCAAGACTAGGGTGCTTGCGGCTCCGAGTGGAAACACAGCCATAGTGGGTGATA	TTCAAGACTAGGGTGCTTGCGGCTCCGAGTGGAAAGATGAATCAAAGAAGGTAAT
TTCAAGACTAGGGTGCTTGCGGCTCCGAGTGGGCGCAAGCCTGATGCAGCCATGC		TTCAAGACTAGGGTGCTTGCGGCTCCGAGTGCCCCGTAAGCGTCAAATAGCGACA	TTCAAGACTAGGGTGCTTGCGGCTCCGAGTAATCCTGTAGTCGAAAATGTTGTCT
TTCAAGACTAGGGTGCTTGCGGCTCCGAGTCGCGTGTATGAAGAAGGCCTTCGGG		TTCAAGACTAGGGTGCTTGCGGCTCCGAGTGACTCGAGTAGGGCGGGACACGTGA	TTCAAGACTAGGGTGCTTGCGGCTCCGAGTCTCTTGAGTGGATCCTGAGTACGAC
TTCAAGACTAGGGTGCTTGCGGCTCCGAGTTTGTAAAGTACTTTCAGCGGGGAGG		TTCAAGACTAGGGTGCTTGCGGCTCCGAGTAATCCTGTCTGAACATGGGGGGACC	TTCAAGACTAGGGTGCTTGCGGCTCCGAGTGGAGCACGTGAAATTCCGTCGGAAT
TTCAAGACTAGGGTGCTTGCGGCTCCGAGTAAGGGAGTAAAGTTAATACCTTTGC		TTCAAGACTAGGGTGCTTGCGGCTCCGAGTACCCTCCAAGCCTAAGTACTCCTCA	TTCAAGACTAGGGTGCTTGCGGCTCCGAGTCTGGGAGGACCATCTCCTAAGGCTA
TTCAAGACTAGGGTGCTTGCGGCTCCGAGTTCATTGACGTTACCCGCAGAAGAAG		TTCAAGACTAGGGTGCTTGCGGCTCCGAGTATGACCGATAGCGAACAAGTACCGT	TTCAAGACTAGGGTGCTTGCGGCTCCGAGTAATACTCTCTAGTGACCGATAG
TTCAAGACTAGGGTGCTTGCGGCTCCGAGTCACCGGCTAACTCCGTGCCAGCAGC		TTCAAGACTAGGGTGCTTGCGGCTCCGAGTGAGGGAAAGGTGAAAAGCACCCCGA	TTCAAGACTAGGGTGCTTGCGGCTCCGAGTTGAAAAGCACCCCGGAAGGGGAGTG
TTCAAGACTAGGGTGCTTGCGGCTCCGAGTCGCGGTAATACGGAGGGTGCAAGCG		TTCAAGACTAGGGTGCTTGCGGCTCCGAGTCAAGGGGAGTGAAACAGAACCTGAA	TTCAAGACTAGGGTGCTTGCGGCTCCGAGTAAATAGAACCTGAAACCGTGTGCTT
TTCAAGACTAGGGTGCTTGCGGCTCCGAGTTTAATCGGAATTACTGGGCGTAAAG		TTCAAGACTAGGGTGCTTGCGGCTCCGAGTATCGGAAGCCTACAAGCAGTCGGAG	TTCAAGACTAGGGTGCTTGCGGCTCCGAGTACAAGTAGTCAGAGCCCGTTAATGG
TTCAAGACTAGGGTGCTTGCGGCTCCGAGTCGCACGCAGGCGGTTTGTTAAGTCA		TTCAAGACTAGGGTGCTTGCGGCTCCGAGTCCACCGCGCGTGGTGACGGCGTACC	TTCAAGACTAGGGTGCTTGCGGCTCCGAGTGTGATGGCGTGCCTTTTGTAGAATG
TTCAAGACTAGGGTGCTTGCGGCTCCGAGTGATGTGAAATCCCCGGGCTCAACCT		TTCAAGACTAGGGTGCTTGCGGCTCCGAGTTTTTGTATAATGGGTCAGCGACTTC	TTCAAGACTAGGGTGCTTGCGGCTCCGAGTAACCGGCGAGTTACGATTTGATGCA
TTCAAGACTAGGGTGCTTGCGGCTCCGAGTGGGAACTGCATCTGATACTGGCAAG		TTCAAGACTAGGGTGCTTGCGGCTCCGAGTATGTGCCGTGCAAGCTTAAGCCGTT	TTCAAGACTAGGGTGCTTGCGGCTCCGAGTAGGTTAAGCAGTAAATGTGGAGCCG
TTCAAGACTAGGGTGCTTGCGGCTCCGAGTCTTGAGTCTCGTAGAGGGGGGTAGA		TTCAAGACTAGGGTGCTTGCGGCTCCGAGTAGGTGTAGGCGCAGCGAAAGCGAGT	TTCAAGACTAGGGTGCTTGCGGCTCCGAGTTAGCGAAAGCGAGTCTGAATAGGGC
TTCAAGACTAGGGTGCTTGCGGCTCCGAGTATTCCAGGTGTAGCGGTGAAATGCG		TTCAAGACTAGGGTGCTTGCGGCTCCGAGTCTGAATAGGGCGAATAAGTACGTCG	TTCAAGACTAGGGTGCTTGCGGCTCCGAGTGTTTAGTATTTGGTCGTAGACCCGA
TTCAAGACTAGGGTGCTTGCGGCTCCGAGTTAGAGATCTGGAGGAATACCGGTGG		TTCAAGACTAGGGTGCTTGCGGCTCCGAGTCATGACGACCCGAAACCAGGTGATC	TTCAAGACTAGGGTGCTTGCGGCTCCGAGTAACCAGGTGATCTACCCTTGGTCAG
TTCAAGACTAGGGTGCTTGCGGCTCCGAGTCGAAGGCGGCCCCCTGGACGAAGAC		TTCAAGACTAGGGTGCTTGCGGCTCCGAGTTATCCATGAGCAGGTTGAAGGTAAG	TTCAAGACTAGGGTGCTTGCGGCTCCGAGTGTTGAAGTTCAGGTAACACTGAATG
TTCAAGACTAGGGTGCTTGCGGCTCCGAGTTGACGCTCAGGTGCGAAAGCGTGGG		TTCAAGACTAGGGTGCTTGCGGCTCCGAGTGTAACACTTACTGGAGGACCGAACC	TTCAAGACTAGGGTGCTTGCGGCTCCGAGTGAGGACCGAACCGACTTACGTTGAA
TTCAAGACTAGGGTGCTTGCGGCTCCGAGTGAGCAAACAGGATTAGATACCCTGG		TTCAAGACTAGGGTGCTTGCGGCTCCGAGTGGTGAATGTTGAAAAATTCTCGGAT	TTCAAGACTAGGGTGCTTGCGGCTCCGAGTGAGGACCGAACCGACTTACGTTGAA
TTCAAGACTAGGGTGCTTGCGGCTCCGAGTTAGTCCACGCCGTAAACGATGTCGA		TTCAAGACTAGGGTGCTTGCGGCTCCGAGTGACTTGTGGATAGGGGTGAAAGGCC	TTCAAGACTAGGGTGCTTGCGGCTCCGAGTCGGAGAAATTCCAATCGAACCTGGA
TTCAAGACTAGGGTGCTTGCGGCTCCGAGTCTTGGAGGTTGTGCCCTTGAGGCGT		TTCAAGACTAGGGTGCTTGCGGCTCCGAGTAATCAAACCTGGACATAGCTGGTTC	TTCAAGACTAGGGTGCTTGCGGCTCCGAGTGATAGCTGGTTCTCTCCGAAATAGC
TTCAAGACTAGGGTGCTTGCGGCTCCGAGTGGCTTCCGGAGCTAACGCGTTAAGT		TTCAAGACTAGGGTGCTTGCGGCTCCGAGTTCCGCGAAAACTATTTAGGTAGTGC	TTCAAGACTAGGGTGCTTGCGGCTCCGAGTTTTAGGGCTAGCCTCAAGTGATGAT
TTCAAGACTAGGGTGCTTGCGGCTCCGAGTCGACCGCCTGGGGAGTACGGCCGCA		TTCAAGACTAGGGTGCTTGCGGCTCCGAGTCTCGGACGAATTCCTTGGGGGGTAG	TTCAAGACTAGGGTGCTTGCGGCTCCGAGTTATTGGAGGTAGAGCACTGTTTGGA
TTCAAGACTAGGGTGCTTGCGGCTCCGAGTAGGTTAAAACTCAAATGAATTGACG		TTCAAGACTAGGGTGCTTGCGGCTCCGAGTAGCACTGAATGGATGCGGGCGGCGC	TTCAAGACTAGGGTGCTTGCGGCTCCGAGTCGAGGGGCCCCTCTCGGGTTACCGA
TTCAAGACTAGGGTGCTTGCGGCTCCGAGTGGGGCCCGCACAAGCGGTGGAGCAT		TTCAAGACTAGGGTGCTTGCGGCTCCGAGTGAGCTGTACCAATTCTAATCAAACT	TTCAAGACTAGGGTGCTTGCGGCTCCGAGTATTCAGACAAACTCCGAATGCCAAT
TTCAAGACTAGGGTGCTTGCGGCTCCGAGTGTGGTTTAATTCGATGCAACGCGAA		TTCAAGACTAGGGTGCTTGCGGCTCCGAGTCCGAATACCCAAGAGAAATATCCGG	TTCAAGACTAGGGTGCTTGCGGCTCCGAGTTAATTTAACTTGGGAGTCAGAACAT
TTCAAGACTAGGGTGCTTGCGGCTCCGAGTGAACCTTACCTGGTCTTGACATCCA		TTCAAGACTAGGGTGCTTGCGGCTCCGAGTGAGACACACGGCGGGTGCTAACGTC	TTCAAGACTAGGGTGCTTGCGGCTCCGAGTGGGTGATAAGGTCCGTGTTCGAAAG
TTCAAGACTAGGGTGCTTGCGGCTCCGAGTCGGAAGTTTTCAGAGATGAGAATGT		TTCAAGACTAGGGTGCTTGCGGCTCCGAGTCGTCGTGAAAAGGGAAACAACCCTA	TTCAAGACTAGGGTGCTTGCGGCTCCGAGTGGAAACAGCCCAGACCACCAGCTAA
TTCAAGACTAGGGTGCTTGCGGCTCCGAGTGCCTTCGGGAACCGTGAGACAGGTG		TTCAAGACTAGGGTGCTTGCGGCTCCGAGTACCATCATCTAAGGCCCCCAAGTAC	TTCAAGACTAGGGTGCTTGCGGCTCCGAGTGGTCCCAAAATATATGTTAAGTGGA
TTCAAGACTAGGGTGCTTGCGGCTCCGAGTCTGCATGGCTGTCGTCAGCTCGTGT		TTCAAGACTAGGGTGCTTGCGGCTCCGAGTTGGCTAAGTGGGAAACGATGTGGGT	TTCAAGACTAGGGTGCTTGCGGCTCCGAGTAAAGGATGTGGCGTTGCCCAGACAACT
TTCAAGACTAGGGTGCTTGCGGCTCCGAGTTGTGAAATGTTGGGTTAAGTCCCGC		TTCAAGACTAGGGTGCTTGCGGCTCCGAGTTTGCTTTGACAACCAGGATGTTGGC	TTCAAGACTAGGGTGCTTGCGGCTCCGAGTCATCATTTAAAGAGTGCGTAATAGC
TTCAAGACTAGGGTGCTTGCGGCTCCGAGTAACGAGCGCAACCCTTATCCTTTGT		TTCAAGACTAGGGTGCTTGCGGCTCCGAGTTTAGAAGCAGCCATCATTTAAAGAA	TTCAAGACTAGGGTGCTTGCGGCTCCGAGTTCACTAGTCGAGTGACACTGCGCCG
TTCAAGACTAGGGTGCTTGCGGCTCCGAGTTGCCAGCGGTCCGGCCGGGAACTCA		TTCAAGACTAGGGTGCTTGCGGCTCCGAGTAGCGTAACAGCTCACTGGTCAAGCG	TTCAAGACTAGGGTGCTTGCGGCTCCGAGTAAAATGTACCGGGGCTAAACATATT
TTCAAGACTAGGGTGCTTGCGGCTCCGAGTAAGGAGACTGCCAGTGATAAACTGG		TTCAAGACTAGGGTGCTTGCGGCTCCGAGTAACCTGCGCGGAAAATGTAACGGGG	TTCAAGACTAGGGTGCTTGCGGCTCCGAGTACCGAAGCTGTGGATTGTCCTTTGG
TTCAAGACTAGGGTGCTTGCGGCTCCGAGTAGGAAGGTGGGGATGACGTCAAGTC		TTCAAGACTAGGGTGCTTGCGGCTCCGAGTCTAAAGCCAGTCGCCGAAGGTATGG	TTCAAGACTAGGGTGCTTGCGGCTCCGAGTACAATGGTAGGAGAGCGTTCTAAGG
TTCAAGACTAGGGTGCTTGCGGCTCCGAGTATCATGGCCCTTACGACCAGGGCTA		TTCAAGACTAGGGTGCTTGCGGCTCCGAGTGTGTGCACTCTGTGCACGCGGTAGC	TTCAAGACTAGGGTGCTTGCGGCTCCGAGTGCGTTGAAGCATGATCGTAAGGACA
TTCAAGACTAGGGTGCTTGCGGCTCCGAGTCACACGTGCTACAATGGCGCATACA		TTCAAGACTAGGGTGCTTGCGGCTCCGAGTGGAGCGTTCCGTAAGCCGATGAAGG	TTCAAGACTAGGGTGCTTGCGGCTCCGAGTTGTGGAGCGCTTAGAAGTGAGAATG
TTCAAGACTAGGGTGCTTGCGGCTCCGAGTAAGAGAAGCGACCTCGCGAGAGCAA		TTCAAGACTAGGGTGCTTGCGGCTCCGAGTTGAGGCGTGAGCCTTGCTGGAGGTA	TTCAAGACTAGGGTGCTTGCGGCTCCGAGTCCGGTGTGAGTAGCGAAAGACGGGT
TTCAAGACTAGGGTGCTTGCGGCTCCGAGTGCGGACCTCATAAAGTGCGTCGTAG		TTCAAGACTAGGGTGCTTGCGGCTCCGAGTTCGGAAGTGAGAATGCTGACATGAG	TTCAAGACTAGGGTGCTTGCGGCTCCGAGTGAGAATCCCGTCCACCGATTGACTA
TTCAAGACTAGGGTGCTTGCGGCTCCGAGTTCCGGATTGGAGTCTGCAACTCGAC		TTCAAGACTAGGGTGCTTGCGGCTCCGAGTTAGCGATAAAGAGGGTGAGAGACCC	TTCAAGACTAGGGTGCTTGCGGCTCCGAGTAGGTTTCCAGAGGAAGGCTCGTCCG
TTCAAGACTAGGGTGCTTGCGGCTCCGAGTTCCATGAAGTCGGAATCGCTAGTAA		TTCAAGACTAGGGTGCTTGCGGCTCCGAGTTCTCGCCGAAAGCCCAAGGGTTCCT	TTCAAGACTAGGGTGCTTGCGGCTCCGAGTCTCTGGGTTAGTCGGGTCCTAAGCT
TTCAAGACTAGGGTGCTTGCGGCTCCGAGTTCGTGGATCAGAATGCCACGGTGAA		TTCAAGACTAGGGTGCTTGCGGCTCCGAGTGCGTAAAGCTAATCTGCGCAGGGTT	TTCAAGACTAGGGTGCTTGCGGCTCCGAGTGAGGCCGACAGGCGTAGGCGATGGA
TTCAAGACTAGGGTGCTTGCGGCTCCGAGTTACGTTCCCGGGCCTTGTACACACC		TTCAAGACTAGGGTGCTTGCGGCTCCGAGTAGTCGGCCCCTAAGGCGAGGCCGAA	TTCAAGACTAGGGTGCTTGCGGCTCCGAGTTAACAGGTTGATATTCCTGTACCAC
TTCAAGACTAGGGTGCTTGCGGCTCCGAGTGCCCGTCACACCATGGGAGTGGGTT		TTCAAGACTAGGGTGCTTGCGGCTCCGAGTAGGCGTAGTCGATGGGAATCAGGTG	TTCAAGACTAGGGTGCTTGCGGCTCCGAGTCTATAATCGTTTTAATCGATGGGGG
TTCAAGACTAGGGTGCTTGCGGCTCCGAGTGCAAAAGAAGTAGGTAGCTTAACCT		TTCAAGACTAGGGTGCTTGCGGCTCCGAGTAATATTCCTGAACCAGTTGGAAGTG	TTCAAGACTAGGGTGCTTGCGGCTCCGAGTGACGCAGTAGGATAGGCGAAGCGTG
TTCAAGACTAGGGTGCTTGCGGCTCCGAGTTCGGGAGGGCGCTTACCACTTTGTG		TTCAAGACTAGGGTGCTTGCGGCTCCGAGTACGGATCTGGTAAATTGTCAGGGCT	TTCAAGACTAGGGTGCTTGCGGCTCCGAGTCGATTGGATTGCACGTCTAAGCAGT
TTCAAGACTAGGGTGCTTGCGGCTCCGAGTATTCATGACTGGGGTGAAGTCGTAA		TTCAAGACTAGGGTGCTTGCGGCTCCGAGTTATTGGATTGCTCCTGGCAGTGAAC	TTCAAGACTAGGGTGCTTGCGGCTCCGAGTAAGGCTGAGTATTAGGCAAATCCGG
TTCAAGACTAGGGTGCTTGCGGCTCCGAGTCAAGGTAACCGTAGGGGAACCTGCG		TTCAAGACTAGGGTGCTTGCGGCTCCGAGTAGGTCCCTGGAAATAACTCCAACGG	TTCAAGACTAGGGTGCTTGCGGCTCCGAGTTACTCATTAAGGCTGAGCTGTGATG
TTCAAGACTAGGGTGCTTGCGGCTCCGAGTAACCTGCGGTTGGATCACCTCCTTA		TTCAAGACTAGGGTGCTTGCGGCTCCGAGTAGACCGTACCCGAAACCGACACAGG	TTCAAGACTAGGGTGCTTGCGGCTCCGAGTGGGAGAAGACATTGTGTCTTCGAGT
TTCAAGACTAGGGTGCTTGCGGCTCCGAGTAGGAAACAGCTTGCTGTTTCGCTGA		TTCAAGACTAGGGTGCTTGCGGCTCCGAGTTGGGCAGGTAGAGTATACCAAGGCG	TTCAAGACTAGGGTGCTTGCGGCTCCGAGTCGTTGATTTCACACTGCCGAGAAAA
TTCAAGACTAGGGTGCTTGCGGCTCCGAGTAGGAAGCAGCTTGCTGCTTCGCTGA		TTCAAGACTAGGGTGCTTGCGGCTCCGAGTCTTGAGAGAACTATGCTGAAGGAAC	TTCAAGACTAGGGTGCTTGCGGCTCCGAGTGCCTCTAGATAGAAAATAGGTGCCC
TTCAAGACTAGGGTGCTTGCGGCTCCGAGTTTGTTGGTGGGGTAACGGCTCACCA		TTCAAGACTAGGGTGCTTGCGGCTCCGAGTTCGGCAAATTGCACGCGTAACTTCG	TTCAAGACTAGGGTGCTTGCGGCTCCGAGTGTACCGCAAACCGACACAGGTAGTC
TTCAAGACTAGGGTGCTTGCGGCTCCGAGTAACGAGCGCAACCCTTATCTTTTGT		TTCAAGACTAGGGTGCTTGCGGCTCCGAGTGGATAAGCGTGACTCTCTTTTGGGC	TTCAAGACTAGGGTGCTTGCGGCTCCGAGTAAGATGAGAATTCTAAGGTGAGCGA
TTCAAGACTAGGGTGCTTGCGGCTCCGAGTCAGAACTTTCCAGAGATGGATTGGT		TTCAAGACTAGGGTGCTTGCGGCTCCGAGTAACCAGATGAGAGTGGCACAAGCCA	TTCAAGACTAGGGTGCTTGCGGCTCCGAGTGCGAACTCTCGTTAAGGAACTCGGC
TTCAAGACTAGGGTGCTTGCGGCTCCGAGTGGTTAAGCGACTAAGCGTACACGGT		TTCAAGACTAGGGTGCTTGCGGCTCCGAGTGGGGGTAGCGACTGTTTATCAAAAA	TTCAAGACTAGGGTGCTTGCGGCTCCGAGTAAAATGACCCCGTAACTTCGGGAGA
TTCAAGACTAGGGTGCTTGCGGCTCCGAGTGGATGCCCTGGCAGTCAGAGGCGAT		TTCAAGACTAGGGTGCTTGCGGCTCCGAGTCACAGGGCTCTGCGAAGCCGCAAGG	TTCAAGACTAGGGTGCTTGCGGCTCCGAGTAGGGGTGCTCTTTAGGGTTAACGCC
TTCAAGACTAGGGTGCTTGCGGCTCCGAGTGAAGGACGTGCTAATCTGCGATAAG		TTCAAGACTAGGGTGCTTGCGGCTCCGAGTCGACGTATAGGGTCTGACGCCTGCC	TTCAAGACTAGGGTGCTTGCGGCTCCGAGTCAGAAGAGCCGCAGTGAATAGGCCC
TTCAAGACTAGGGTGCTTGCGGCTCCGAGTCGTCGGTAAGGTGATATGAACCGTT		TTCAAGACTAGGGTGCTTGCGGCTCCGAGTCGGTGCCTGAAGGTTAAAAGGAGGG	TTCAAGACTAGGGTGCTTGCGGCTCCGAGTAAGCGACTGTTTATCAAAAACACAG
TTCAAGACTAGGGTGCTTGCGGCTCCGAGTATAACCGGCGATTTCCGAATGGGGA		TTCAAGACTAGGGTGCTTGCGGCTCCGAGTGTGCAAGCTCTGAATTGAAGCCCAG	TTCAAGACTAGGGTGCTTGCGGCTCCGAGTGTCTCTGCTAAACCGTAAGGTGATG
TTCAAGACTAGGGTGCTTGCGGCTCCGAGTAACCCAGTGTGTTTCGACACACTAT		TTCAAGACTAGGGTGCTTGCGGCTCCGAGTGTAAACGGCGGCCGTAACTATAACG	TTCAAGACTAGGGTGCTTGCGGCTCCGAGTTATAGGGGCTGACGCCTGCCCGGTG
TTCAAGACTAGGGTGCTTGCGGCTCCGAGTCATTAACTGAATCCATAGGTTAATG		TTCAAGACTAGGGTGCTTGCGGCTCCGAGTGTCCTAAGGTAGCGAAATTCCTTGT	TTCAAGACTAGGGTGCTTGCGGCTCCGAGTCTGGAAGGTTAAGAGGAGTGGTTAG
TTCAAGACTAGGGTGCTTGCGGCTCCGAGTAGGCGAACCGGGGGAACTGAAACAT		TTCAAGACTAGGGTGCTTGCGGCTCCGAGTCGGGTAAGTTCCGACCTGCACGAAT	TTCAAGACTAGGGTGCTTGCGGCTCCGAGTTCTGCGAAGCTACGAATCGAAGCCCCAGT
TTCAAGACTAGGGTGCTTGCGGCTCCGAGTCTAAGTACCCCGAGGAAAAGAAATC		TTCAAGACTAGGGTGCTTGCGGCTCCGAGTGGCGTAACGACTTCCCCACTGTCTC	TTCAAGACTAGGGTGCTTGCGGCTCCGAGTTAAGTTCCGACCCGCACGAAAGGCG
TTCAAGACTAGGGTGCTTGCGGCTCCGAGTAACCGAGATTCCCCCAGTAGCGGCG		TTCAAGACTAGGGTGCTTGCGGCTCCGAGTCAGCATAGGCTCAGCGAAATTGAAT	TTCAAGACTAGGGTGCTTGCGGCTCCGAGTTAACGATTTGGGCACTGTCTCAACG
TTCAAGACTAGGGTGCTTGCGGCTCCGAGTAGCGAACGGGGAGGAGCCCAGAGCC		TTCAAGACTAGGGTGCTTGCGGCTCCGAGTTCCCCGTGAAGATGCGGGGTTCCCG	TTCAAGACTAGGGTGCTTGCGGCTCCGAGTAGAGACTCGGTGAAATCATAGTACC
TTCAAGACTAGGGTGCTTGCGGCTCCGAGTTGAATCAGTGTGTGTGTTAGTGGAA		TTCAAGACTAGGGTGCTTGCGGCTCCGAGTCGGTCAGACGGAAAGACCCTATGAA	TTCAAGACTAGGGTGCTTGCGGCTCCGAGTTGTGAAGATGCAGGTTACCCGCGAC
TTCAAGACTAGGGTGCTTGCGGCTCCGAGTGCGTCTGGAAAGGCGCGCGATACAG		TTCAAGACTAGGGTGCTTGCGGCTCCGAGTCCTTTACTGCAGCTTCGCCTTGGCG	TTCAAGACTAGGGTGCTTGCGGCTCCGAGTAGGACGGAAAGACCCCGTGGAGCTT
TTCAAGACTAGGGTGCTTGCGGCTCCGAGTGGTGACAGCCCCGTACACAAAAATG		TTCAAGACTAGGGTGCTTGCGGCTCCGAGTTTAGCAGCAACATGTGTAGGATAGG	TTCAAGACTAGGGTGCTTGCGGCTCCGAGTTACTGTAGCCTGATATTGAAATTCG
TTCAAGACTAGGGTGCTTGCGGCTCCGAGTCACATGCTGTGAGCTCGATGAGTAG		TTCAAGACTAGGGTGCTTGCGGCTCCGAGTTGGGAGGCTATGAAACTCGGGCGCC	TTCAAGACTAGGGTGCTTGCGGCTCCGAGTGCACAGCTTGTACAGGATAGGTAGG
TTCAAGACTAGGGTGCTTGCGGCTCCGAGTGGCGGGACACGTGGTATCCTGTCTG		TTCAAGACTAGGGTGCTTGCGGCTCCGAGTAGTTCGAGTGGAGCCATCCTTGAAA	TTCAAGACTAGGGTGCTTGCGGCTCCGAGTAGCCTTTGAAACGTGAGCGCTAGCT
TTCAAGACTAGGGTGCTTGCGGCTCCGAGTAATATGGGGGGACCATCCTCCAAGG		TTCAAGACTAGGGTGCTTGCGGCTCCGAGTTACCACCCTTATTGTTGCTGACGTC	TTCAAGACTAGGGTGCTTGCGGCTCCGAGTTACGTGGAGGCGCTGGTGGGATACT
TTCAAGACTAGGGTGCTTGCGGCTCCGAGTCTAAATACTCCTGACTGACCGATAG		TTCAAGACTAGGGTGCTTGCGGCTCCGAGTTAACCGCGGCCCGTTATCCGGGTCC	TTCAAGACTAGGGTGCTTGCGGCTCCGAGTACCCTAGCTGTGTTGGCTTTCTAAC
TTCAAGACTAGGGTGCTTGCGGCTCCGAGTTGAACCAGTACCGTGAGGGAAAGGC		TTCAAGACTAGGGTGCTTGCGGCTCCGAGTGGGACATGGCGTGGCGGGCAGTTTG	TTCAAGACTAGGGTGCTTGCGGCTCCGAGTCCGCACCACTTATCGTGGTGGGAGA
TTCAAGACTAGGGTGCTTGCGGCTCCGAGTGAAAAGAACCCCGGCGAGGGGAGTG		TTCAAGACTAGGGTGCTTGCGGCTCCGAGTACTGGGGCGGTCGCCTCCCAAAGTG	TTCAAGACTAGGGTGCTTGCGGCTCCGAGTCAGTGTCAGGCGGGCAGTTTGACTG
TTCAAGACTAGGGTGCTTGCGGCTCCGAGTAAAAAGAACCTGAAACCGTGTACGT		TTCAAGACTAGGGTGCTTGCGGCTCCGAGTTAACGGAGGCGCGCGATGGTGGGCT	TTCAAGACTAGGGTGCTTGCGGCTCCGAGTGGGCGGTCGCCTCCTAAAAGGTAAC
TTCAAGACTAGGGTGCTTGCGGCTCCGAGTACAAGCAGTGGGAGCATGCTTAGGC		TTCAAGACTAGGGTGCTTGCGGCTCCGAGTCAGACCGGTCGGAAATCGGTCGTCG	TTCAAGACTAGGGTGCTTGCGGCTCCGAGTGGAGGCGCTCAAAGGTTCCCTCAGA
TTCAAGACTAGGGTGCTTGCGGCTCCGAGTGTGTGACTGCGTACCTTTTGTATAA		TTCAAGACTAGGGTGCTTGCGGCTCCGAGTAGTGCAATGGCATAAGCCCGCCTGA	TTCAAGACTAGGGTGCTTGCGGCTCCGAGTATGGTTGGAAATCATTCATAGAGTG
TTCAAGACTAGGGTGCTTGCGGCTCCGAGTTGGGTCAGCGACTTATATTCTGTAG		TTCAAGACTAGGGTGCTTGCGGCTCCGAGTCTGCGAGACTGACAAGTCGAGCAGA	TTCAAGACTAGGGTGCTTGCGGCTCCGAGTTAAAGGCATAAGGGAGCTTGACTGC
TTCAAGACTAGGGTGCTTGCGGCTCCGAGTCAAGGTTAACCGAATAGGGGAGCCG		TTCAAGACTAGGGTGCTTGCGGCTCCGAGTGACGAAAGTCGGCCATAGTGATCCG	TTCAAGACTAGGGTGCTTGCGGCTCCGAGTGAGACCTACAAGTCGAGCAGGGTCG
TTCAAGACTAGGGTGCTTGCGGCTCCGAGTAAGGGAAACCGAGTCTTAACTGGGC		TTCAAGACTAGGGTGCTTGCGGCTCCGAGTGTGGTCCTGCGTGGAAGGGCCATCG	TTCAAGACTAGGGTGCTTGCGGCTCCGAGTAAAGACGGACTTAGTGATCCGGTGG
TTCAAGACTAGGGTGCTTGCGGCTCCGAGTGTTAAGTTGCAGGGTATAGACCCGA		TTCAAGACTAGGGTGCTTGCGGCTCCGAGTCTCAACGAATAAAAGGTACTCTAGG	TTCAAGACTAGGGTGCTTGCGGCTCCGAGTTTCCGCATGGAAGGGCCATCGCTCA
TTCAAGACTAGGGTGCTTGCGGCTCCGAGTAACCCGGTGATCTAGCCATGGGCAG		TTCAAGACTAGGGTGCTTGCGGCTCCGAGTGATAACAGGCTGATTTTGCCCAAGA	TTCAAGACTAGGGTGCTTGCGGCTCCGAGTACGGATAAAAGCTACCCCGGGGATA
TTCAAGACTAGGGTGCTTGCGGCTCCGAGTGTTGAAGGTTGGGTAACACTAACTG		TTCAAGACTAGGGTGCTTGCGGCTCCGAGTGTCCATATCGACGGCAAAGTTTGGC	TTCAAGACTAGGGTGCTTGCGGCTCCGAGTACAGGCTTATCTCCCCCAAGAGTTC
TTCAAGACTAGGGTGCTTGCGGCTCCGAGTGAGGACCGAACCGACTAATGTTGAA		TTCAAGACTAGGGTGCTTGCGGCTCCGAGTACCTCGATGTCGGCTCATCACATCC	TTCAAGACTAGGGTGCTTGCGGCTCCGAGTACATCGACGGGGAGGTTTGGCACCT
TTCAAGACTAGGGTGCTTGCGGCTCCGAGTAAATTAGCGGATGACTTGTGGCTGG		TTCAAGACTAGGGTGCTTGCGGCTCCGAGTTGGGGCTGGAGCAGGTCCCAAGGGT	TTCAAGACTAGGGTGCTTGCGGCTCCGAGTCGATGTCGGCTCATCGCATCCTGGG
TTCAAGACTAGGGTGCTTGCGGCTCCGAGTGGGTGAAAGGCCAATCAAACCGGGA		TTCAAGACTAGGGTGCTTGCGGCTCCGAGTTCGGCTGTTCGCCGATTAAAGTGGT	TTCAAGACTAGGGTGCTTGCGGCTCCGAGTGCTGTAGTCGGTCCCAAGGGTTGGG
TTCAAGACTAGGGTGCTTGCGGCTCCGAGTGATAGCTGGTTCTCCCCGAAAGCTA		TTCAAGACTAGGGTGCTTGCGGCTCCGAGTACGTGAGCTGGGTTCAGAACGTCGT	TTCAAGACTAGGGTGCTTGCGGCTCCGAGTCTGTTCGCCCATTAAAGCGGTACGC
TTCAAGACTAGGGTGCTTGCGGCTCCGAGTTTTAGGTAGCGCCTCGTGAACTCAT		TTCAAGACTAGGGTGCTTGCGGCTCCGAGTGAGACAGTTTGGTCCCTATCTGCCG	TTCAAGACTAGGGTGCTTGCGGCTCCGAGTGAGCTGGGTTCAGAACGTCGTGAGA
TTCAAGACTAGGGTGCTTGCGGCTCCGAGTCTCCGGGGGTAGAGCACTGTTTCGG		TTCAAGACTAGGGTGCTTGCGGCTCCGAGTTGGGTGTACGAGACTTGAGAGGATC	TTCAAGACTAGGGTGCTTGCGGCTCCGAGTCAGTTCGGTCCCTATCCGTCGTGGG
TTCAAGACTAGGGTGCTTGCGGCTCCGAGTCAAGGGGGTCATCCCGACTTACCAA		TTCAAGACTAGGGTGCTTGCGGCTCCGAGTTGTCCCTAGTACGAGAGGACCGGGA	TTCAAGACTAGGGTGCTTGCGGCTCCGAGTCGTAGGAAATTTGAGAGGAGCTGTC
TTCAAGACTAGGGTGCTTGCGGCTCCGAGTCCCGATGCAAACTGCGAATACCGGA		TTCAAGACTAGGGTGCTTGCGGCTCCGAGTTGGACACACCTCTGGTGGACCTGTC	TTCAAGACTAGGGTGCTTGCGGCTCCGAGTCTTAGTACGAGAGGACCGGGATGGA
TTCAAGACTAGGGTGCTTGCGGCTCCGAGTGAATGTTATCACGGGAGACACACGG		TTCAAGACTAGGGTGCTTGCGGCTCCGAGTATGGCGCCAGCTGTGCAGCAGGGTA	TTCAAGACTAGGGTGCTTGCGGCTCCGAGTCATACCTCTGGTGTACCAGTTGTCG
TTCAAGACTAGGGTGCTTGCGGCTCCGAGTCGGGTGCTAACGTCCGTCGTGAAGA		TTCAAGACTAGGGTGCTTGCGGCTCCGAGTGCTAAGTGTGGAATAGATAACCGCT	TTCAAGACTAGGGTGCTTGCGGCTCCGAGTTGCCAACGGCATAGCTGGGTAGCTA
TTCAAGACTAGGGTGCTTGCGGCTCCGAGTGGGAAACAACCCAGACCGCCAGCTA		TTCAAGACTAGGGTGCTTGCGGCTCCGAGTGAAAGCATCTAAGCGGGAAACTAAC	TTCAAGACTAGGGTGCTTGCGGCTCCGAGTTGTGTGGACGGGATAAGTGCTGAAA
TTCAAGACTAGGGTGCTTGCGGCTCCGAGTAGGTCCCAAAGTCATGGTTAAGTGG		TTCAAGACTAGGGTGCTTGCGGCTCCGAGTCTCAAAACAAGGTCTCGCTGAGAGC	TTCAAGACTAGGGTGCTTGCGGCTCCGAGTGCATCTAAGCATGAAGCCCCCCTCA
TTCAAGACTAGGGTGCTTGCGGCTCCGAGTGAAACGATGTGGGAAGGCCCAGACA		TTCAAGACTAGGGTGCTTGCGGCTCCGAGTCGTGGAAGACCACCACGTTGATAGG	TTCAAGACTAGGGTGCTTGCGGCTCCGAGTAGATGAGATTTCCCAACTTCGGTTA
TTCAAGACTAGGGTGCTTGCGGCTCCGAGTGCCAGGATGTTGGCTTAGAAGCAGC		TTCAAGACTAGGGTGCTTGCGGCTCCGAGTCCGGGTGTGGAAGTGCGGTGACGCA	TTCAAGACTAGGGTGCTTGCGGCTCCGAGTTAAGATCCCTCAAAGATGATGAGGT
TTCAAGACTAGGGTGCTTGCGGCTCCGAGTCATCATTTAAAGAAAGCGTAATAGC		TTCAAGACTAGGGTGCTTGCGGCTCCGAGTTGGAGCTTACCGGTACTAATAG	TTCAAGACTAGGGTGCTTGCGGCTCCGAGTTAATAGGTTCGAGGTGGAAGCATGG
TTCAAGACTAGGGTGCTTGCGGCTCCGAGTTCACTGGTCGAGTCGGCCTGCGCGG		TTCAAGACTAGGGTGCTTGCGGCTCCGAGTCTCGATAGGCTTGATCGTTCT	TTCAAGACTAGGGTGCTTGCGGCTCCGAGTTGACATGTGGAGCTGACGAATACT
TTCAAGACTAGGGTGCTTGCGGCTCCGAGTAAGATGTAACGGGGCTAAACCATGC		TTCAAGACTAGGGTGCTTGCGGCTCCGAGTGAGTTTGATCCTGGCTCAGAGCGAA	TTCAAGACTAGGGTGCTTGCGGCTCCGAGTAATCGATCGAAGACTTAATCAAAA
TTCAAGACTAGGGTGCTTGCGGCTCCGAGTACCGAAGCTGCGGCAGCGACGCTTA		TTCAAGACTAGGGTGCTTGCGGCTCCGAGTCGCTGGCGGCAGGCCTAACACATGC	TTCAAGACTAGGGTGCTTGCGGCTCCGAGTTTTTATGGAGAGTTTGATCCTGGCT
TTCAAGACTAGGGTGCTTGCGGCTCCGAGTTGCGTTGTTGGGTAGGGGAGCGTTC		TTCAAGACTAGGGTGCTTGCGGCTCCGAGTAAGTCGAACGGATCCTTCGGGATTA	TTCAAGACTAGGGTGCTTGCGGCTCCGAGTCAGGATGAACGCTGGCGGCGTGCCT
TTCAAGACTAGGGTGCTTGCGGCTCCGAGTTGTAAGCCTGTGAAGGTGTACTGTG		TTCAAGACTAGGGTGCTTGCGGCTCCGAGTGTGGCGGACGGGTGAGTAACACGTG	TTCAAGACTAGGGTGCTTGCGGCTCCGAGTAATACATGCAAGTCGAGCGAACGGA
TTCAAGACTAGGGTGCTTGCGGCTCCGAGTAGGTATGCTGGAGGTATCAGAAGTG		TTCAAGACTAGGGTGCTTGCGGCTCCGAGTGGAACGTGCCCTTTGGTTCGGAACA	TTCAAGACTAGGGTGCTTGCGGCTCCGAGTCGAGAAGCTTGCTTCTCTGATGTTA
TTCAAGACTAGGGTGCTTGCGGCTCCGAGTCGAATGCTGACATAAGTAACGATAA		TTCAAGACTAGGGTGCTTGCGGCTCCGAGTACTCAGGGAAACTTGAGCTAATACC	TTCAAGACTAGGGTGCTTGCGGCTCCGAGTGCGGCGGACGGGTGAGTAACACGTG
TTCAAGACTAGGGTGCTTGCGGCTCCGAGTAGCGGGTGAAAAGCCCGCTCGCCGG		TTCAAGACTAGGGTGCTTGCGGCTCCGAGTGGATGTGCCCTTCGGGGGAAAGATT	TTCAAGACTAGGGTGCTTGCGGCTCCGAGTGATAACCTACCTATAAGACTGGGAT
TTCAAGACTAGGGTGCTTGCGGCTCCGAGTAAGACCAAGGGTTCCTGTCCAACGT		TTCAAGACTAGGGTGCTTGCGGCTCCGAGTTATCGCCATTGGAGCGGCCCGCGTC	TTCAAGACTAGGGTGCTTGCGGCTCCGAGTAACTTCGGGAAACCGGAGCTAATAC
TTCAAGACTAGGGTGCTTGCGGCTCCGAGTTAATCGGGGCAGGGTGAGTCGACCC		TTCAAGACTAGGGTGCTTGCGGCTCCGAGTTGATTAGCTAGTTGGTGAGGTAAAG	TTCAAGACTAGGGTGCTTGCGGCTCCGAGTCGGATAATATTTTGAACCGCATGGT
TTCAAGACTAGGGTGCTTGCGGCTCCGAGTCTAAGGCGAGGCCGAAAGGCGTAGT		TTCAAGACTAGGGTGCTTGCGGCTCCGAGTGCTCACCAAGGCGACGATCAGTAGC	TTCAAGACTAGGGTGCTTGCGGCTCCGAGTTCAAAAGTGAAAGACGGTCTTGCTG
TTCAAGACTAGGGTGCTTGCGGCTCCGAGTCGATGGGAAACAGGTTAATATTCCT		TTCAAGACTAGGGTGCTTGCGGCTCCGAGTTGGTCTGAGAGGATGATCAGCCACA	TTCAAGACTAGGGTGCTTGCGGCTCCGAGTTCACTTATAGATGGATCCGCGCTGC
TTCAAGACTAGGGTGCTTGCGGCTCCGAGTGTACTTGGTGTTACTGCGAAGGGGG		TTCAAGACTAGGGTGCTTGCGGCTCCGAGTTTGGGACTGAGACACGGCCCAAACT	TTCAAGACTAGGGTGCTTGCGGCTCCGAGTATTAGCTAGTTGGTAAGGTAACGGC
TTCAAGACTAGGGTGCTTGCGGCTCCGAGTGACGGAGAAGGCTATGTTGGCCGGG		TTCAAGACTAGGGTGCTTGCGGCTCCGAGTCCTACGGGAGGCAGCAGTGGGGAAT	TTCAAGACTAGGGTGCTTGCGGCTCCGAGTTTACCAAGGCAACGATGCATAGCCG
TTCAAGACTAGGGTGCTTGCGGCTCCGAGTCGACGGTTGTCCCGGTTTAAGCGTG		TTCAAGACTAGGGTGCTTGCGGCTCCGAGTCTTGCGCAATGGGCGAAAGCCTGAC	TTCAAGACTAGGGTGCTTGCGGCTCCGAGTACCTGAGAGGGTGATCGGCCACACTGGAA
TTCAAGACTAGGGTGCTTGCGGCTCCGAGTTAGGCTGGTTTTCCAGGCAAATCCG		TTCAAGACTAGGGTGCTTGCGGCTCCGAGTGCAGCCATGCCGCGTGAATGATGAA	TTCAAGACTAGGGTGCTTGCGGCTCCGAGTGCAGCAGTAGGGAATCTTCCGCAAT
TTCAAGACTAGGGTGCTTGCGGCTCCGAGTGAAAATCAAGGCTGAGGCGTGATGA		TTCAAGACTAGGGTGCTTGCGGCTCCGAGTGGTCTTAGGATTGTAAAATTCTTTC	TTCAAGACTAGGGTGCTTGCGGCTCCGAGTGGGCGAAAGCCTGACGGAGCAACGC
TTCAAGACTAGGGTGCTTGCGGCTCCGAGTCGAGGCACTACGGTGCTGAAGCAAC		TTCAAGACTAGGGTGCTTGCGGCTCCGAGTACCGGGGACGATAATGACGGTACCC	TTCAAGACTAGGGTGCTTGCGGCTCCGAGTCGCGTGAGTGATGAAGGTCTTCGGA
TTCAAGACTAGGGTGCTTGCGGCTCCGAGTAAATGCCCTGCTTCCAGGAAAAGCC		TTCAAGACTAGGGTGCTTGCGGCTCCGAGTGGAGAAGAAGCCCCGGCTAACTTCG	TTCAAGACTAGGGTGCTTGCGGCTCCGAGTTCGTAAAACTCTGTTATTAGGGAAG
TTCAAGACTAGGGTGCTTGCGGCTCCGAGTTCTAAGCATCAGGTAACATCAAATC		TTCAAGACTAGGGTGCTTGCGGCTCCGAGTTGCCAGCAGCCGCGGTAATACGAAG	TTCAAGACTAGGGTGCTTGCGGCTCCGAGTAACATATGTGTAAGTAACTGTGCAC
TTCAAGACTAGGGTGCTTGCGGCTCCGAGTGTACCCCAAACCGACACAGGTGGTC		TTCAAGACTAGGGTGCTTGCGGCTCCGAGTGGGGCTAGCGTTGCTCGGAATTACT	TTCAAGACTAGGGTGCTTGCGGCTCCGAGTATCTTGACGGTACCTAATCAGAAAG
TTCAAGACTAGGGTGCTTGCGGCTCCGAGTAGGTAGAGAATACCAAGGCGCTTGA		TTCAAGACTAGGGTGCTTGCGGCTCCGAGTGGGCGTAAAGGGAGCGTAGGCGGAC	TTCAAGACTAGGGTGCTTGCGGCTCCGAGTCCACGGCTAACTACGTGCCAGCAGC
TTCAAGACTAGGGTGCTTGCGGCTCCGAGTGAGAACTCGGGTGAAGGAACTAGGC		TTCAAGACTAGGGTGCTTGCGGCTCCGAGTTGTTTAGTCAGAGGTGAAAGCCCAG	TTCAAGACTAGGGTGCTTGCGGCTCCGAGTCGCGGTAATACGTAGGTGGCAAGCG
TTCAAGACTAGGGTGCTTGCGGCTCCGAGTAAAATGGTGCCGTAACTTCGGGAGA		TTCAAGACTAGGGTGCTTGCGGCTCCGAGTGGCTCAACCTTGGAATTGCCTTTGA	TTCAAGACTAGGGTGCTTGCGGCTCCGAGTTTATCCGGAATTATTGGGCGTAAAG
TTCAAGACTAGGGTGCTTGCGGCTCCGAGTAGGCACGCTGATATGTAGGTGAAGC		TTCAAGACTAGGGTGCTTGCGGCTCCGAGTTACTGGCAGTCTTGAGTACGGAAGA	TTCAAGACTAGGGTGCTTGCGGCTCCGAGTCGCGCGTAGGCGGTTTTTTAAGTCT
TTCAAGACTAGGGTGCTTGCGGCTCCGAGTGACTTGCTCGTGGAGCTGAAATCAG		TTCAAGACTAGGGTGCTTGCGGCTCCGAGTGGTATGTGGAACTCCGAGTGTAGAG	TTCAAGACTAGGGTGCTTGCGGCTCCGAGTGATGTGAAAGCCCACGGCTCAACCG
TTCAAGACTAGGGTGCTTGCGGCTCCGAGTTCGAAGATACCAGCTGGCTGCAACT		TTCAAGACTAGGGTGCTTGCGGCTCCGAGTGTGAAATTCGTAGATATTCGGAAGA	TTCAAGACTAGGGTGCTTGCGGCTCCGAGTTGGAGGGTCATTGGAAACTGGAAAA
TTCAAGACTAGGGTGCTTGCGGCTCCGAGTGTTTATTAAAAACACAGCACTGTGC		TTCAAGACTAGGGTGCTTGCGGCTCCGAGTACACCAGTGGCGAAGGCGACATACT	TTCAAGACTAGGGTGCTTGCGGCTCCGAGTCTTGAGTGCAGAAGAGGAAAGTGGA
TTCAAGACTAGGGTGCTTGCGGCTCCGAGTAAACACGAAAGTGGACGTATACGGT		TTCAAGACTAGGGTGCTTGCGGCTCCGAGTGGTCCGTTACTGACGCTGAGGCTCG	TTCAAGACTAGGGTGCTTGCGGCTCCGAGTATTCCATGTGTAGCGGTGAAATGCG
TTCAAGACTAGGGTGCTTGCGGCTCCGAGTGTGACGCCTGCCCGGTGCCGGAAGG		TTCAAGACTAGGGTGCTTGCGGCTCCGAGTAAAGCGTGGGGAGCAAACAGGATTA	TTCAAGACTAGGGTGCTTGCGGCTCCGAGTCAGAGATATGGAGGAACACCAGTGG
TTCAAGACTAGGGTGCTTGCGGCTCCGAGTTTAATTGATGGGGTTAGCGCAAGCG		TTCAAGACTAGGGTGCTTGCGGCTCCGAGTGATACCCTGGTAGTCCACGCCGTAA	TTCAAGACTAGGGTGCTTGCGGCTCCGAGTCGAAGGCGACTTTCTGGTCTGTAAC
TTCAAGACTAGGGTGCTTGCGGCTCCGAGTAAGCTCTTGATCGAAGCCCCGGTAA		TTCAAGACTAGGGTGCTTGCGGCTCCGAGTACGATGAGTGCTAGTTGTCGGCATG	TTCAAGACTAGGGTGCTTGCGGCTCCGAGTTGACGCTGATGTGCGAAAGCGTGGG
TTCAAGACTAGGGTGCTTGCGGCTCCGAGTACGGCGGCCGTAACTATAACGGTCC		TTCAAGACTAGGGTGCTTGCGGCTCCGAGTCATGCATGTCGGTGACGCAGCTAAC	TTCAAGACTAGGGTGCTTGCGGCTCCGAGTGATCAAACAGGATTAGATACCCTGG
TTCAAGACTAGGGTGCTTGCGGCTCCGAGTTAAGGTAGCGAAATTCCTTGTCGGG		TTCAAGACTAGGGTGCTTGCGGCTCCGAGTGCATTAAGCACTCCGCCTGGGGAGT	TTCAAGACTAGGGTGCTTGCGGCTCCGAGTTAGTCCACGCCGTAAACGATGAGTG
TTCAAGACTAGGGTGCTTGCGGCTCCGAGTTAAGTTCCGACCTGCACGAATGGCG		TTCAAGACTAGGGTGCTTGCGGCTCCGAGTACGGTCGCAAGATTAAAACTCAAAG	TTCAAGACTAGGGTGCTTGCGGCTCCGAGTCTAAGTGTTAGGGGGTTTCCGCCCC
TTCAAGACTAGGGTGCTTGCGGCTCCGAGTTAATGATGGCCAGGCTGTCTCCACC		TTCAAGACTAGGGTGCTTGCGGCTCCGAGTGAATTGACGGGGGCCCGCACAAGCG	TTCAAGACTAGGGTGCTTGCGGCTCCGAGTTTAGTGCTGCAGCTAACGCATTAAG
TTCAAGACTAGGGTGCTTGCGGCTCCGAGTCGAGACTCAGTGAAATTGAACTCGC		TTCAAGACTAGGGTGCTTGCGGCTCCGAGTGTGGAGCATGTGGTTTAATTCGAAG	TTCAAGACTAGGGTGCTTGCGGCTCCGAGTCACTCCGCCTGGGGAGTACGACCGC
TTCAAGACTAGGGTGCTTGCGGCTCCGAGTTGTGAAGATGCAGTGTACCCGCGGC		TTCAAGACTAGGGTGCTTGCGGCTCCGAGTCAACGCGCAGAACCTTACCACCTTT	TTCAAGACTAGGGTGCTTGCGGCTCCGAGTAAGGTTGAAACTCAAAGGAATTGAC
TTCAAGACTAGGGTGCTTGCGGCTCCGAGTAAGACGGAAAGACCCCGTGAACCTT		TTCAAGACTAGGGTGCTTGCGGCTCCGAGTTGACATGCCTGGACCGCCACAGAGA	TTCAAGACTAGGGTGCTTGCGGCTCCGAGTGGGGACCCGCACAAGCGGTGGAGCA
TTCAAGACTAGGGTGCTTGCGGCTCCGAGTTACTATAGCTTGACACTGAACATTG		TTCAAGACTAGGGTGCTTGCGGCTCCGAGTTGTGGTTTTCCCTTCGGGGACTGGG	TTCAAGACTAGGGTGCTTGCGGCTCCGAGTTGTGGTTTAATTCGAAGCAACGCGA
TTCAAGACTAGGGTGCTTGCGGCTCCGAGTAGCCTTGATGTGTAGGATAGGTGGG		TTCAAGACTAGGGTGCTTGCGGCTCCGAGTACACAGGTGCTGCATGGCTGTCGTC	TTCAAGACTAGGGTGCTTGCGGCTCCGAGTAGAACCTTACCAAATCTTGACATCC
TTCAAGACTAGGGTGCTTGCGGCTCCGAGTAGGCTTTGAAGTGTGGACGCCAGTC		TTCAAGACTAGGGTGCTTGCGGCTCCGAGTAGCTCGTGTCGTGAGATGTTGGGTT	TTCAAGACTAGGGTGCTTGCGGCTCCGAGTTTTGACAACTCTAGAGATAGAGCCT
TTCAAGACTAGGGTGCTTGCGGCTCCGAGTTGCATGGAGCCGACCTTGAAATACC		TTCAAGACTAGGGTGCTTGCGGCTCCGAGTAAGTCCCGCAACGAGCGCAACCCTC	TTCAAGACTAGGGTGCTTGCGGCTCCGAGTTCCCCTTCGGGGGACAAAGTGACAG
TTCAAGACTAGGGTGCTTGCGGCTCCGAGTACCCTTTAATGTTTGATGTTCTAAC		TTCAAGACTAGGGTGCTTGCGGCTCCGAGTGTGATTAGTTGCCATCAGGTTTGGC	TTCAAGACTAGGGTGCTTGCGGCTCCGAGTGTGGTGCATGGTTGTCGTCAGCTCG
TTCAAGACTAGGGTGCTTGCGGCTCCGAGTGTTGACCCGTAATCCGGGTTGCGGA		TTCAAGACTAGGGTGCTTGCGGCTCCGAGTTGGGCACTCTAATCATACTGCCGGA	TTCAAGACTAGGGTGCTTGCGGCTCCGAGTTGTCGTGAGATGTTGGGTTAAGTCC
TTCAAGACTAGGGTGCTTGCGGCTCCGAGTCAGTGTCTGGTGGGTAGTTTGACTG		TTCAAGACTAGGGTGCTTGCGGCTCCGAGTGTTAATCCGGAGGAAGGCGGGGATG	TTCAAGACTAGGGTGCTTGCGGCTCCGAGTCGCAACGAGCGCAACCCTTAAGCTT
TTCAAGACTAGGGTGCTTGCGGCTCCGAGTGGGCGGTCTCCTCCTAAAGAGTAAC		TTCAAGACTAGGGTGCTTGCGGCTCCGAGTACGTCAAGTCCTCATGGCCCTTACA	TTCAAGACTAGGGTGCTTGCGGCTCCGAGTAGTTGCCATCATTAAGTTGGGCACT
TTCAAGACTAGGGTGCTTGCGGCTCCGAGTGGAGGAGCACGAAGGTTGGCTAATC		TTCAAGACTAGGGTGCTTGCGGCTCCGAGTAGGTGGGCTACACACGTGCTACAAT	TTCAAGACTAGGGTGCTTGCGGCTCCGAGTCTAAGTTGACTGCCGGTGACAAACC
TTCAAGACTAGGGTGCTTGCGGCTCCGAGTCTGGTCGGACATCAGGAGGTTAGTG		TTCAAGACTAGGGTGCTTGCGGCTCCGAGTGGCGACTACAGAGGGCTGCAATCCC	TTCAAGACTAGGGTGCTTGCGGCTCCGAGTGGAGGAAGGTGGGGATGACGTCAAA
TTCAAGACTAGGGTGCTTGCGGCTCCGAGTCAATGGCATAAGCCAGCTTGACTGC		TTCAAGACTAGGGTGCTTGCGGCTCCGAGTGCGAGGGGGAGCCAATCCCTAAAAG	TTCAAGACTAGGGTGCTTGCGGCTCCGAGTTCATCATGCCCCTTATGATTTGGGC
TTCAAGACTAGGGTGCTTGCGGCTCCGAGTGAGCGTGACGGCGCGAGCAGGTGCG		TTCAAGACTAGGGTGCTTGCGGCTCCGAGTTCGTCTCAGTTCGGATTGTTCTCTG	TTCAAGACTAGGGTGCTTGCGGCTCCGAGTTACACACGTGCTACAATGGACAATA
TTCAAGACTAGGGTGCTTGCGGCTCCGAGTAAAGCAGGTCATAGTGATCCGGTGG		TTCAAGACTAGGGTGCTTGCGGCTCCGAGTCAACTCGAGAGCATGAAGTTGGAAT	TTCAAGACTAGGGTGCTTGCGGCTCCGAGTCAAAGGGCAGCGAAACCGCGAGGTC
TTCAAGACTAGGGTGCTTGCGGCTCCGAGTTTCTGAATGGAAGGGCCATCGCTCA		TTCAAGACTAGGGTGCTTGCGGCTCCGAGTCGCTAGTAATCGCGGATCAGCATGC	TTCAAGACTAGGGTGCTTGCGGCTCCGAGTAAGCAAATCCCATAAAGTTGTTCTC
TTCAAGACTAGGGTGCTTGCGGCTCCGAGTACGGATAAAAGGTACTCCGGGGATA		TTCAAGACTAGGGTGCTTGCGGCTCCGAGTCGCGGTGAATACGTTCCCGGGCCTT	TTCAAGACTAGGGTGCTTGCGGCTCCGAGTAGTTCGGATTGTAGTCTGCAACTCG
TTCAAGACTAGGGTGCTTGCGGCTCCGAGTACAGGCTGATACCGCCCAAGAGTTC		TTCAAGACTAGGGTGCTTGCGGCTCCGAGTGTACACACCGCCCGTCACACCATGG	TTCAAGACTAGGGTGCTTGCGGCTCCGAGTACTACATGAAGCTGGAATCGCTAGT
TTCAAGACTAGGGTGCTTGCGGCTCCGAGTATATCGACGGCGGTGTTTGGCACCT		TTCAAGACTAGGGTGCTTGCGGCTCCGAGTGAGTTGGCTTTACCCGAAGGCGCTG	TTCAAGACTAGGGTGCTTGCGGCTCCGAGTAATCGTAGATCAGCATGCTACGGTG
TTCAAGACTAGGGTGCTTGCGGCTCCGAGTCGATGTCGGCTCATCACATCCTGGG		TTCAAGACTAGGGTGCTTGCGGCTCCGAGTCGCTAACCGCAAGGGGGCAGGCGAC	TTCAAGACTAGGGTGCTTGCGGCTCCGAGTAATACGTTCCCGGGTCTTGTACACA
TTCAAGACTAGGGTGCTTGCGGCTCCGAGTGCTGAAGTAGGTCCCAAGGGTATGG		TTCAAGACTAGGGTGCTTGCGGCTCCGAGTCACGGTAGGGTCAGCGACTGGGGTG	TTCAAGACTAGGGTGCTTGCGGCTCCGAGTCCGCCCGTCACACCACGAGAGTTTG
TTCAAGACTAGGGTGCTTGCGGCTCCGAGTCTGTTCGCCATTTAAAGTGGTACGC		TTCAAGACTAGGGTGCTTGCGGCTCCGAGTAAGTCGTAACAAGGTAGCCGTAGGG	TTCAAGACTAGGGTGCTTGCGGCTCCGAGTTAACACCCGAAGCCGGTGGAGTAAC
TTCAAGACTAGGGTGCTTGCGGCTCCGAGTGAGCTGGGTTTAGAACGTCGTGAGA		TTCAAGACTAGGGTGCTTGCGGCTCCGAGTGAACCTGCGGCTGGATCACCTCCTTT	TTCAAGACTAGGGTGCTTGCGGCTCCGAGTCTTTTAGGAGCTAGCCGTCGAAGGT
TTCAAGACTAGGGTGCTTGCGGCTCCGAGTCAGTTCGGTCCCTATCTGCCGTGGG			TTCAAGACTAGGGTGCTTGCGGCTCCGAGTGGGACAAATGATTGGGGTGAAGTCG
TTCAAGACTAGGGTGCTTGCGGCTCCGAGTCGCTGGAGAACTGAGGGGGGCTGCT			TTCAAGACTAGGGTGCTTGCGGCTCCGAGTTAACAAGGTAGCCGTATCGGAAGGT
TTCAAGACTAGGGTGCTTGCGGCTCCGAGTCCTAGTACGAGAGGACCGGAGTGGA			TTCAAGACTAGGGTGCTTGCGGCTCCGAGTGCGGCTGGATCACCTCCTTTCTAA
TTCAAGACTAGGGTGCTTGCGGCTCCGAGTCGCATCACTGGTGTTCGGGTTGTCA
TTCAAGACTAGGGTGCTTGCGGCTCCGAGTTGCCAATGGCACTGCCCGGTAGCTA
TTCAAGACTAGGGTGCTTGCGGCTCCGAGTAATGCGGAAGAGATAAGTGCTGAAA
TTCAAGACTAGGGTGCTTGCGGCTCCGAGTGCATCTAAGCACGAAACTTGCCCCG
TTCAAGACTAGGGTGCTTGCGGCTCCGAGTAGATGAGTTCTCCCTGACTCCTTGA
TTCAAGACTAGGGTGCTTGCGGCTCCGAGTGAGTCCTGAAGGAACGTTGAAGACG
TTCAAGACTAGGGTGCTTGCGGCTCCGAGTACGACGTTGATAGGCCGGGTGTGTA
TTCAAGACTAGGGTGCTTGCGGCTCCGAGTAGCGCAGCGATGCGTTGAGCTAACC
TTCAAGACTAGGGTGCTTGCGGCTCCGAGTGGTACTAATGAACCGTGAGGCTTAACCTT
TTCAAGACTAGGGTGCTTGCGGCTCCGAGTGCAGCCCAGAGCCTGAATCAGTATG
TTCAAGACTAGGGTGCTTGCGGCTCCGAGTCACATATTGTGAGCTCGATGAGTAG
TTCAAGACTAGGGTGCTTGCGGCTCCGAGTACAAGCAGTGGGAGCACGCTTAGGC
TTCAAGACTAGGGTGCTTGCGGCTCCGAGTTTTAGGTAGCGCCTCGTGAATTCAT
TTCAAGACTAGGGTGCTTGCGGCTCCGAGTCCTGCGAAGGTGTGCTGTGAGGCAT
TTCAAGACTAGGGTGCTTGCGGCTCCGAGTAGGTGAGGTCCCTCGCGGATGGAGC
TTCAAGACTAGGGTGCTTGCGGCTCCGAGTTGGGGTTAGCCGCAAGGCGAAGCTC
TTCAAGACTAGGGTGCTTGCGGCTCCGAGTACGTGGACCCGTGATCCGGGTTGCG
TTCAAGACTAGGGTGCTTGCGGCTCCGAGTGAAGTAGGTCCCAAGGGTGATGCTG
TTCAAGACTAGGGTGCTTGCGGCTCCGAGTTCCCTGACCCTTTAAGGGTCCTGAA
TTCAAGACTAGGGTGCTTGCGGCTCCGAGTCTCTGTTGGTTCTCCCGCAACG
TTCAAGACTAGGGTGCTTGCGGCTCCGAGTCTACTCTGTTTACCAGGTCAGGTCC
TTCAAGACTAGGGTGCTTGCGGCTCCGAGTGGAAGGAAGCAGCCAAGGCAGATGA
TTCAAGACTAGGGTGCTTGCGGCTCCGAGTCGCGTGTGCCGGGATGTAGCT
TTCAAGACTAGGGTGCTTGCGGCTCCGAGTTGGGAGAGCACCTCCCTTACAAGG
TTCAAGACTAGGGTGCTTGCGGCTCCGAGTTCAGTTGGTAGAGCAGTTGACTT
TTCAAGACTAGGGTGCTTGCGGCTCCGAGTGGCTATAGCTCAGCTGGGAGAGCG
TTCAAGACTAGGGTGCTTGCGGCTCCGAGTGGTCAGCGGTTCGATCCCGCTTAGC
TTCAAGACTAGGGTGCTTGCGGCTCCGAGTGGTCTGCGGTTCGATCCCGCATAGC
TTCAAGACTAGGGTGCTTGCGGCTCCGAGTGATTAGCTCAGCTGGGAGAGC
TTCAAGACTAGGGTGCTTGCGGCTCCGAGTGGGGCTGATTCTGGATTCGACGGGA
TTCAAGACTAGGGTGCTTGCGGCTCCGAGTTTTGCGAAACCCAAGGTGCATGCCG
TTCAAGACTAGGGTGCTTGCGGCTCCGAGTAGGGGCGGTTGGCCTCGTAAAAAGC
TTCAAGACTAGGGTGCTTGCGGCTCCGAGTCGCAAAAAATAGTCGCAAACGACGA
TTCAAGACTAGGGTGCTTGCGGCTCCGAGTAAACTACGCTTTAGCAGCTTAATAA
TTCAAGACTAGGGTGCTTGCGGCTCCGAGTCCTGCTTAGAGCCCTCTCTCCCTAG
TTCAAGACTAGGGTGCTTGCGGCTCCGAGTCCTCCGCTCTTAGGACGGGGATCAA
TTCAAGACTAGGGTGCTTGCGGCTCCGAGTGAGAGGTCAAACCCAAAAGAGATCG
TTCAAGACTAGGGTGCTTGCGGCTCCGAGTCGTGGAAGCCCTGCCTGGGGTTGAA
TTCAAGACTAGGGTGCTTGCGGCTCCGAGTGCGTTAAAACTTAATCAGGCTAGTT
TTCAAGACTAGGGTGCTTGCGGCTCCGAGTTGTTAGTGGCGTGTCCGTCCGCAGC
TTCAAGACTAGGGTGCTTGCGGCTCCGAGTTGGCAAGCGAATGTAAAGACTGACT
TTCAAGACTAGGGTGCTTGCGGCTCCGAGTAAGCATGTAGTACCGAGGATG
TTCAAGACTAGGGTGCTTGCGGCTCCGAGTTAGGAATTTCGGACGCGGGTT
TTCAAGACTAGGGTGCTTGCGGCTCCGAGTCAACTCCCGCCAGCTCCACCA
TTCAAGACTAGGGTGCTTGCGGCTCCGAGTGCGGTAGTTCAGTCGGTTAGAATAC
TTCAAGACTAGGGTGCTTGCGGCTCCGAGTCTGCCTGTCACGCAGGGGGTC
TTCAAGACTAGGGTGCTTGCGGCTCCGAGTGGGTTCGAGTCCCGTCCGTTCCG
TTCAAGACTAGGGTGCTTGCGGCTCCGAGTGAAGGTGGCGGAATTGGTAGACGC
TTCAAGACTAGGGTGCTTGCGGCTCCGAGTCAGGTGTTAGTGTCCTTACGGACGT
96 round 1 RT Primers	5' mod	Universal	Universal (RT Priming)		Full Sequence
1	/5Phos/	GCCAGA	NNNNNN		/5Phos/GCCAGACAGAGAANNNNNN
2	/5Phos/	GCCAGA	NNNNNN		/5Phos/GCCAGACCAGGAANNNNNN
3	/5Phos/	GCCAGA	NNNNNN		/5Phos/GCCAGACTCCGAANNNNNN
4	/5Phos/	GCCAGA	NNNNNN		/5Phos/GCCAGACGTTGAANNNNNN
5	/5Phos/	GCCAGA	NNNNNN		/5Phos/GCCAGACCTACAANNNNNN
6	/5Phos/	GCCAGA	NNNNNN		/5Phos/GCCAGACTGTCAANNNNNN
7	/5Phos/	GCCAGA	NNNNNN		/5Phos/GCCAGACGCATAANNNNNN
8	/5Phos/	GCCAGA	NNNNNN		/5Phos/GCCAGACAAGAGANNNNNN
9	/5Phos/	GCCAGA	NNNNNN		/5Phos/GCCAGACTGCAGANNNNNN
10	/5Phos/	GCCAGA	NNNNNN		/5Phos/GCCAGACGAACGANNNNNN
11	/5Phos/	GCCAGA	NNNNNN		/5Phos/GCCAGACTTGTGANNNNNN
12	/5Phos/	GCCAGA	NNNNNN		/5Phos/GCCAGACCGTTGANNNNNN
13	/5Phos/	GCCAGA	NNNNNN		/5Phos/GCCAGACGGAACANNNNNN
14	/5Phos/	GCCAGA	NNNNNN		/5Phos/GCCAGACCTCACANNNNNN
15	/5Phos/	GCCAGA	NNNNNN		/5Phos/GCCAGACACTACANNNNNN
16	/5Phos/	GCCAGA	NNNNNN		/5Phos/GCCAGACTAAGCANNNNNN
17	/5Phos/	GCCAGA	NNNNNN		/5Phos/GCCAGACGAGTCANNNNNN
18	/5Phos/	GCCAGA	NNNNNN		/5Phos/GCCAGACGCGATANNNNNN
19	/5Phos/	GCCAGA	NNNNNN		/5Phos/GCCAGACATGGTANNNNNN
20	/5Phos/	GCCAGA	NNNNNN		/5Phos/GCCAGACACACTANNNNNN
21	/5Phos/	GCCAGA	NNNNNN		/5Phos/GCCAGACTACCTANNNNNN
22	/5Phos/	GCCAGA	NNNNNN		/5Phos/GCCAGACTTGAAGNNNNNN
23	/5Phos/	GCCAGA	NNNNNN		/5Phos/GCCAGACGACAAGNNNNNN
24	/5Phos/	GCCAGA	NNNNNN		/5Phos/GCCAGACAGTAAGNNNNNN
25	/5Phos/	GCCAGA	NNNNNN		/5Phos/GCCAGACACGTAGNNNNNN
26	/5Phos/	GCCAGA	NNNNNN		/5Phos/GCCAGACCTCTAGNNNNNN
27	/5Phos/	GCCAGA	NNNNNN		/5Phos/GCCAGACACAAGGNNNNNN
28	/5Phos/	GCCAGA	NNNNNN		/5Phos/GCCAGACAATCGGNNNNNN
29	/5Phos/	GCCAGA	NNNNNN		/5Phos/GCCAGACCAATGGNNNNNN
30	/5Phos/	GCCAGA	NNNNNN		/5Phos/GCCAGACTATACGNNNNNN
31	/5Phos/	GCCAGA	NNNNNN		/5Phos/GCCAGACATAGCGNNNNNN
32	/5Phos/	GCCAGA	NNNNNN		/5Phos/GCCAGACTGATCGNNNNNN
33	/5Phos/	GCCAGA	NNNNNN		/5Phos/GCCAGACAACTCGNNNNNN
34	/5Phos/	GCCAGA	NNNNNN		/5Phos/GCCAGACCGAATGNNNNNN
35	/5Phos/	GCCAGA	NNNNNN		/5Phos/GCCAGACTCCATGNNNNNN
36	/5Phos/	GCCAGA	NNNNNN		/5Phos/GCCAGACGTTATGNNNNNN
37	/5Phos/	GCCAGA	NNNNNN		/5Phos/GCCAGACCATGTGNNNNNN
38	/5Phos/	GCCAGA	NNNNNN		/5Phos/GCCAGACTTACTGNNNNNN
39	/5Phos/	GCCAGA	NNNNNN		/5Phos/GCCAGACTAGTTGNNNNNN
40	/5Phos/	GCCAGA	NNNNNN		/5Phos/GCCAGACTCGCATNNNNNN
41	/5Phos/	GCCAGA	NNNNNN		/5Phos/GCCAGACCGCAATNNNNNN
42	/5Phos/	GCCAGA	NNNNNN		/5Phos/GCCAGACGCTAATNNNNNN
43	/5Phos/	GCCAGA	NNNNNN		/5Phos/GCCAGACATCCATNNNNNN
44	/5Phos/	GCCAGA	NNNNNN		/5Phos/GCCAGACCTGAGTNNNNNN
45	/5Phos/	GCCAGA	NNNNNN		/5Phos/GCCAGACTTCGGTNNNNNN
46	/5Phos/	GCCAGA	NNNNNN		/5Phos/GCCAGACGATGGTNNNNNN
47	/5Phos/	GCCAGA	NNNNNN		/5Phos/GCCAGACAGACGTNNNNNN
48	/5Phos/	GCCAGA	NNNNNN		/5Phos/GCCAGACCTTCTTNNNNNN
49	/5Phos/	GCCAGA	NNNNNN		/5Phos/GCCAGAGACGGAANNNNNN
50	/5Phos/	GCCAGA	NNNNNN		/5Phos/GCCAGAGCTCGAANNNNNN
51	/5Phos/	GCCAGA	NNNNNN		/5Phos/GCCAGAGTCACAANNNNNN
52	/5Phos/	GCCAGA	NNNNNN		/5Phos/GCCAGAGAACCAANNNNNN
53	/5Phos/	GCCAGA	NNNNNN		/5Phos/GCCAGAGCGATAANNNNNN
54	/5Phos/	GCCAGA	NNNNNN		/5Phos/GCCAGAGGTGTAANNNNNN
55	/5Phos/	GCCAGA	NNNNNN		/5Phos/GCCAGAGAGAAGANNNNNN
56	/5Phos/	GCCAGA	NNNNNN		/5Phos/GCCAGAGTCGAGANNNNNN
57	/5Phos/	GCCAGA	NNNNNN		/5Phos/GCCAGAGGACAGANNNNNN
58	/5Phos/	GCCAGA	NNNNNN		/5Phos/GCCAGAGCTTAGANNNNNN
59	/5Phos/	GCCAGA	NNNNNN		/5Phos/GCCAGAGAATGGANNNNNN
60	/5Phos/	GCCAGA	NNNNNN		/5Phos/GCCAGAGTTCCGANNNNNN
61	/5Phos/	GCCAGA	NNNNNN		/5Phos/GCCAGAGCAGTGANNNNNN
62	/5Phos/	GCCAGA	NNNNNN		/5Phos/GCCAGAGCCAACANNNNNN
63	/5Phos/	GCCAGA	NNNNNN		/5Phos/GCCAGAGATGACANNNNNN
64	/5Phos/	GCCAGA	NNNNNN		/5Phos/GCCAGAGTGTACANNNNNN
65	/5Phos/	GCCAGA	NNNNNN		/5Phos/GCCAGAGGTACCANNNNNN
66	/5Phos/	GCCAGA	NNNNNN		/5Phos/GCCAGAGTACTCANNNNNN
67	/5Phos/	GCCAGA	NNNNNN		/5Phos/GCCAGAGCGCATANNNNNN
68	/5Phos/	GCCAGA	NNNNNN		/5Phos/GCCAGAGTAGGTANNNNNN
69	/5Phos/	GCCAGA	NNNNNN		/5Phos/GCCAGAGCCTGTANNNNNN
70	/5Phos/	GCCAGA	NNNNNN		/5Phos/GCCAGAGCAACTANNNNNN
71	/5Phos/	GCCAGA	NNNNNN		/5Phos/GCCAGAGAGGCTANNNNNN
72	/5Phos/	GCCAGA	NNNNNN		/5Phos/GCCAGAGACCTTANNNNNN
73	/5Phos/	GCCAGA	NNNNNN		/5Phos/GCCAGAGAAGAAGNNNNNN
74	/5Phos/	GCCAGA	NNNNNN		/5Phos/GCCAGAGCCTAAGNNNNNN
75	/5Phos/	GCCAGA	NNNNNN		/5Phos/GCCAGAGTGAGAGNNNNNN
76	/5Phos/	GCCAGA	NNNNNN		/5Phos/GCCAGAGATACAGNNNNNN
77	/5Phos/	GCCAGA	NNNNNN		/5Phos/GCCAGAGGATCAGNNNNNN
78	/5Phos/	GCCAGA	NNNNNN		/5Phos/GCCAGAGAGCTAGNNNNNN
79	/5Phos/	GCCAGA	NNNNNN		/5Phos/GCCAGAGATCAGGNNNNNN
80	/5Phos/	GCCAGA	NNNNNN		/5Phos/GCCAGAGTAACGGNNNNNN
81	/5Phos/	GCCAGA	NNNNNN		/5Phos/GCCAGAGGTATGGNNNNNN
82	/5Phos/	GCCAGA	NNNNNN		/5Phos/GCCAGAGACATCGNNNNNN
83	/5Phos/	GCCAGA	NNNNNN		/5Phos/GCCAGAGTTGTCGNNNNNN
84	/5Phos/	GCCAGA	NNNNNN		/5Phos/GCCAGAGCATTCGNNNNNN
85	/5Phos/	GCCAGA	NNNNNN		/5Phos/GCCAGAGGCAATGNNNNNN
86	/5Phos/	GCCAGA	NNNNNN		/5Phos/GCCAGAGTGGATGNNNNNN
87	/5Phos/	GCCAGA	NNNNNN		/5Phos/GCCAGAGCTAGTGNNNNNN
88	/5Phos/	GCCAGA	NNNNNN		/5Phos/GCCAGAGAACGTGNNNNNN
89	/5Phos/	GCCAGA	NNNNNN		/5Phos/GCCAGAGTCTCTGNNNNNN
90	/5Phos/	GCCAGA	NNNNNN		/5Phos/GCCAGAGACCAATNNNNNN
91	/5Phos/	GCCAGA	NNNNNN		/5Phos/GCCAGAGCATGATNNNNNN
92	/5Phos/	GCCAGA	NNNNNN		/5Phos/GCCAGAGTCTGGTNNNNNN
93	/5Phos/	GCCAGA	NNNNNN		/5Phos/GCCAGAGCTACGTNNNNNN
94	/5Phos/	GCCAGA	NNNNNN		/5Phos/GCCAGAGAAGCGTNNNNNN
95	/5Phos/	GCCAGA	NNNNNN		/5Phos/GCCAGAGTGCTGTNNNNNN
96	/5Phos/	GCCAGA	NNNNNN		/5Phos/GCCAGAGTAGACTNNNNNN
96 round 2 ligation primers	5' mod	Universal	Universal		Full Sequence
1	/5Phos/	GCTTCGC	CCTCCTAC		/5Phos/GCTTCGCGACCTTACCTCCTAC
2	/5Phos/	GCTTCGC	CCTCCTAC		/5Phos/GCTTCGCAGAGTGACCTCCTAC
3	/5Phos/	GCTTCGC	CCTCCTAC		/5Phos/GCTTCGCTGACTCACCTCCTAC
4	/5Phos/	GCTTCGC	CCTCCTAC		/5Phos/GCTTCGCGCCTGTACCTCCTAC
5	/5Phos/	GCTTCGC	CCTCCTAC		/5Phos/GCTTCGCGTAGTCACCTCCTAC
6	/5Phos/	GCTTCGC	CCTCCTAC		/5Phos/GCTTCGCTGGCGAACCTCCTAC
7	/5Phos/	GCTTCGC	CCTCCTAC		/5Phos/GCTTCGCGCTGCTACCTCCTAC
8	/5Phos/	GCTTCGC	CCTCCTAC		/5Phos/GCTTCGCACCAGAACCTCCTAC
9	/5Phos/	GCTTCGC	CCTCCTAC		/5Phos/GCTTCGCGGTTCAACCTCCTAC
10	/5Phos/	GCTTCGC	CCTCCTAC		/5Phos/GCTTCGCGGACAGACCTCCTAC
11	/5Phos/	GCTTCGC	CCTCCTAC		/5Phos/GCTTCGCCATGGTACCTCCTAC
12	/5Phos/	GCTTCGC	CCTCCTAC		/5Phos/GCTTCGCACGGAGACCTCCTAC
13	/5Phos/	GCTTCGC	CCTCCTAC		/5Phos/GCTTCGCCTAACGACCTCCTAC
14	/5Phos/	GCTTCGC	CCTCCTAC		/5Phos/GCTTCGCTCCGTAACCTCCTAC
15	/5Phos/	GCTTCGC	CCTCCTAC		/5Phos/GCTTCGCCACTCAACCTCCTAC
16	/5Phos/	GCTTCGC	CCTCCTAC		/5Phos/GCTTCGCCAGAGAACCTCCTAC
17	/5Phos/	GCTTCGC	CCTCCTAC		/5Phos/GCTTCGCTGCACTACCTCCTAC
18	/5Phos/	GCTTCGC	CCTCCTAC		/5Phos/GCTTCGCATGAGGACCTCCTAC
19	/5Phos/	GCTTCGC	CCTCCTAC		/5Phos/GCTTCGCACGCGTACCTCCTAC
20	/5Phos/	GCTTCGC	CCTCCTAC		/5Phos/GCTTCGCATCGCCACCTCCTAC
21	/5Phos/	GCTTCGC	CCTCCTAC		/5Phos/GCTTCGCGTCGAGACCTCCTAC
22	/5Phos/	GCTTCGC	CCTCCTAC		/5Phos/GCTTCGCTTGACCACCTCCTAC
23	/5Phos/	GCTTCGC	CCTCCTAC		/5Phos/GCTTCGCTCAAGGACCTCCTAC
24	/5Phos/	GCTTCGC	CCTCCTAC		/5Phos/GCTTCGCAGTCCTACCTCCTAC
25	/5Phos/	GCTTCGC	CCTCCTAC		/5Phos/GCTTCGCATCCTGACCTCCTAC
26	/5Phos/	GCTTCGC	CCTCCTAC		/5Phos/GCTTCGCAGGACAACCTCCTAC
27	/5Phos/	GCTTCGC	CCTCCTAC		/5Phos/GCTTCGCCACGTCACCTCCTAC
28	/5Phos/	GCTTCGC	CCTCCTAC		/5Phos/GCTTCGCGCTTAGACCTCCTAC
29	/5Phos/	GCTTCGC	CCTCCTAC		/5Phos/GCTTCGCGCCAACACCTCCTAC
30	/5Phos/	GCTTCGC	CCTCCTAC		/5Phos/GCTTCGCTTCGGTACCTCCTAC
31	/5Phos/	GCTTCGC	CCTCCTAC		/5Phos/GCTTCGCGAGAAGACCTCCTAC
32	/5Phos/	GCTTCGC	CCTCCTAC		/5Phos/GCTTCGCCAGTTGACCTCCTAC
33	/5Phos/	GCTTCGC	CCTCCTAC		/5Phos/GCTTCGCTCAGACACCTCCTAC
34	/5Phos/	GCTTCGC	CCTCCTAC		/5Phos/GCTTCGCCTTGACACCTCCTAC
35	/5Phos/	GCTTCGC	CCTCCTAC		/5Phos/GCTTCGCCCGGTTACCTCCTAC
36	/5Phos/	GCTTCGC	CCTCCTAC		/5Phos/GCTTCGCGATGTGACCTCCTAC
37	/5Phos/	GCTTCGC	CCTCCTAC		/5Phos/GCTTCGCCTGGCAACCTCCTAC
38	/5Phos/	GCTTCGC	CCTCCTAC		/5Phos/GCTTCGCGAACCAACCTCCTAC
39	/5Phos/	GCTTCGC	CCTCCTAC		/5Phos/GCTTCGCCAAGAGACCTCCTAC
40	/5Phos/	GCTTCGC	CCTCCTAC		/5Phos/GCTTCGCGCTCGAACCTCCTAC
41	/5Phos/	GCTTCGC	CCTCCTAC		/5Phos/GCTTCGCCGCATAACCTCCTAC
42	/5Phos/	GCTTCGC	CCTCCTAC		/5Phos/GCTTCGCCGGAACACCTCCTAC
43	/5Phos/	GCTTCGC	CCTCCTAC		/5Phos/GCTTCGCCCTTGCACCTCCTAC
44	/5Phos/	GCTTCGC	CCTCCTAC		/5Phos/GCTTCGCCCACATACCTCCTAC
45	/5Phos/	GCTTCGC	CCTCCTAC		/5Phos/GCTTCGCCAACGCACCTCCTAC
46	/5Phos/	GCTTCGC	CCTCCTAC		/5Phos/GCTTCGCCCAATCACCTCCTAC
47	/5Phos/	GCTTCGC	CCTCCTAC		/5Phos/GCTTCGCCGTAGGACCTCCTAC
48	/5Phos/	GCTTCGC	CCTCCTAC		/5Phos/GCTTCGCTGTGAGACCTCCTAC
49	/5Phos/	GCTTCGC	CCTCCTAC		/5Phos/GCTTCGCACTGGTTCCTCCTAC
50	/5Phos/	GCTTCGC	CCTCCTAC		/5Phos/GCTTCGCAAGCGATCCTCCTAC
51	/5Phos/	GCTTCGC	CCTCCTAC		/5Phos/GCTTCGCGGCCATTCCTCCTAC
52	/5Phos/	GCTTCGC	CCTCCTAC		/5Phos/GCTTCGCAACGAGTCCTCCTAC
53	/5Phos/	GCTTCGC	CCTCCTAC		/5Phos/GCTTCGCACCATCTCCTCCTAC
54	/5Phos/	GCTTCGC	CCTCCTAC		/5Phos/GCTTCGCCATTGGTCCTCCTAC
55	/5Phos/	GCTTCGC	CCTCCTAC		/5Phos/GCTTCGCGAGTCATCCTCCTAC
56	/5Phos/	GCTTCGC	CCTCCTAC		/5Phos/GCTTCGCCGCTAATCCTCCTAC
57	/5Phos/	GCTTCGC	CCTCCTAC		/5Phos/GCTTCGCATCCACTCCTCCTAC
58	/5Phos/	GCTTCGC	CCTCCTAC		/5Phos/GCTTCGCGATCAGTCCTCCTAC
59	/5Phos/	GCTTCGC	CCTCCTAC		/5Phos/GCTTCGCAGAGACTCCTCCTAC
60	/5Phos/	GCTTCGC	CCTCCTAC		/5Phos/GCTTCGCGCACAATCCTCCTAC
61	/5Phos/	GCTTCGC	CCTCCTAC		/5Phos/GCTTCGCGTGTAGTCCTCCTAC
62	/5Phos/	GCTTCGC	CCTCCTAC		/5Phos/GCTTCGCAGCTCGTCCTCCTAC
63	/5Phos/	GCTTCGC	CCTCCTAC		/5Phos/GCTTCGCAGGCAGTCCTCCTAC
64	/5Phos/	GCTTCGC	CCTCCTAC		/5Phos/GCTTCGCCAAGCATCCTCCTAC
65	/5Phos/	GCTTCGC	CCTCCTAC		/5Phos/GCTTCGCTCCACATCCTCCTAC
66	/5Phos/	GCTTCGC	CCTCCTAC		/5Phos/GCTTCGCTAGAGGTCCTCCTAC
67	/5Phos/	GCTTCGC	CCTCCTAC		/5Phos/GCTTCGCGTCAGGTCCTCCTAC
68	/5Phos/	GCTTCGC	CCTCCTAC		/5Phos/GCTTCGCCGAGGTTCCTCCTAC
69	/5Phos/	GCTTCGC	CCTCCTAC		/5Phos/GCTTCGCAGTCGCTCCTCCTAC
70	/5Phos/	GCTTCGC	CCTCCTAC		/5Phos/GCTTCGCGAGGACTCCTCCTAC
71	/5Phos/	GCTTCGC	CCTCCTAC		/5Phos/GCTTCGCTGCAACTCCTCCTAC
72	/5Phos/	GCTTCGC	CCTCCTAC		/5Phos/GCTTCGCGTAACCTCCTCCTAC
73	/5Phos/	GCTTCGC	CCTCCTAC		/5Phos/GCTTCGCATCGGATCCTCCTAC
74	/5Phos/	GCTTCGC	CCTCCTAC		/5Phos/GCTTCGCTAACCGTCCTCCTAC
75	/5Phos/	GCTTCGC	CCTCCTAC		/5Phos/GCTTCGCCCTGAATCCTCCTAC
76	/5Phos/	GCTTCGC	CCTCCTAC		/5Phos/GCTTCGCCACCTGTCCTCCTAC
77	/5Phos/	GCTTCGC	CCTCCTAC		/5Phos/GCTTCGCCCGTGATCCTCCTAC
78	/5Phos/	GCTTCGC	CCTCCTAC		/5Phos/GCTTCGCGGTAGTTCCTCCTAC
79	/5Phos/	GCTTCGC	CCTCCTAC		/5Phos/GCTTCGCCGTATCTCCTCCTAC
80	/5Phos/	GCTTCGC	CCTCCTAC		/5Phos/GCTTCGCGTTGCATCCTCCTAC
81	/5Phos/	GCTTCGC	CCTCCTAC		/5Phos/GCTTCGCAAGACCTCCTCCTAC
82	/5Phos/	GCTTCGC	CCTCCTAC		/5Phos/GCTTCGCTGGTCTTCCTCCTAC
83	/5Phos/	GCTTCGC	CCTCCTAC		/5Phos/GCTTCGCTACCGTTCCTCCTAC
84	/5Phos/	GCTTCGC	CCTCCTAC		/5Phos/GCTTCGCTCTGCCTCCTCCTAC
85	/5Phos/	GCTTCGC	CCTCCTAC		/5Phos/GCTTCGCCCGAAGTCCTCCTAC
86	/5Phos/	GCTTCGC	CCTCCTAC		/5Phos/GCTTCGCCTCGCTTCCTCCTAC
87	/5Phos/	GCTTCGC	CCTCCTAC		/5Phos/GCTTCGCAGGTTCTCCTCCTAC
88	/5Phos/	GCTTCGC	CCTCCTAC		/5Phos/GCTTCGCTCTCGGTCCTCCTAC
89	/5Phos/	GCTTCGC	CCTCCTAC		/5Phos/GCTTCGCGGCGTATCCTCCTAC
90	/5Phos/	GCTTCGC	CCTCCTAC		/5Phos/GCTTCGCAGAAGGTCCTCCTAC
91	/5Phos/	GCTTCGC	CCTCCTAC		/5Phos/GCTTCGCACGGCATCCTCCTAC
92	/5Phos/	GCTTCGC	CCTCCTAC		/5Phos/GCTTCGCCTGAGCTCCTCCTAC
93	/5Phos/	GCTTCGC	CCTCCTAC		/5Phos/GCTTCGCATGGTGTCCTCCTAC
94	/5Phos/	GCTTCGC	CCTCCTAC		/5Phos/GCTTCGCCGATCCTCCTCCTAC
95	/5Phos/	GCTTCGC	CCTCCTAC		/5Phos/GCTTCGCCCAACTTCCTCCTAC
96	/5Phos/	GCTTCGC	CCTCCTAC		/5Phos/GCTTCGCGTGCTCTCCTCCTAC
96 round 3 ligation primers	Universal	UMI	Universal		Full Sequence
1	AGAATACACGACGCTCTTCCGATCT	NNNNNNN	GGTCCTTG		AGAATACACGACGCTCTTCCGATCTNNNNNNNGTGTGAAGGTCCTTG
2	AGAATACACGACGCTCTTCCGATCT	NNNNNNN	GGTCCTTG		AGAATACACGACGCTCTTCCGATCTNNNNNNNTTGGTGAGGTCCTTG
3	AGAATACACGACGCTCTTCCGATCT	NNNNNNN	GGTCCTTG		AGAATACACGACGCTCTTCCGATCTNNNNNNNGTCACAAGGTCCTTG
4	AGAATACACGACGCTCTTCCGATCT	NNNNNNN	GGTCCTTG		AGAATACACGACGCTCTTCCGATCTNNNNNNNGCGATAAGGTCCTTG
5	AGAATACACGACGCTCTTCCGATCT	NNNNNNN	GGTCCTTG		AGAATACACGACGCTCTTCCGATCTNNNNNNNTACAGCAGGTCCTTG
6	AGAATACACGACGCTCTTCCGATCT	NNNNNNN	GGTCCTTG		AGAATACACGACGCTCTTCCGATCTNNNNNNNTAGGCAAGGTCCTTG
7	AGAATACACGACGCTCTTCCGATCT	NNNNNNN	GGTCCTTG		AGAATACACGACGCTCTTCCGATCTNNNNNNNAACGTGAGGTCCTTG
8	AGAATACACGACGCTCTTCCGATCT	NNNNNNN	GGTCCTTG		AGAATACACGACGCTCTTCCGATCTNNNNNNNGGTTCAAGGTCCTTG
9	AGAATACACGACGCTCTTCCGATCT	NNNNNNN	GGTCCTTG		AGAATACACGACGCTCTTCCGATCTNNNNNNNGAGAAGAGGTCCTTG
10	AGAATACACGACGCTCTTCCGATCT	NNNNNNN	GGTCCTTG		AGAATACACGACGCTCTTCCGATCTNNNNNNNCGCGATAGGTCCTTG
11	AGAATACACGACGCTCTTCCGATCT	NNNNNNN	GGTCCTTG		AGAATACACGACGCTCTTCCGATCTNNNNNNNAAGTCGAGGTCCTTG
12	AGAATACACGACGCTCTTCCGATCT	NNNNNNN	GGTCCTTG		AGAATACACGACGCTCTTCCGATCTNNNNNNNCCAGCTAGGTCCTTG
13	AGAATACACGACGCTCTTCCGATCT	NNNNNNN	GGTCCTTG		AGAATACACGACGCTCTTCCGATCTNNNNNNNCCGAATAGGTCCTTG
14	AGAATACACGACGCTCTTCCGATCT	NNNNNNN	GGTCCTTG		AGAATACACGACGCTCTTCCGATCTNNNNNNNTCAGGAAGGTCCTTG
15	AGAATACACGACGCTCTTCCGATCT	NNNNNNN	GGTCCTTG		AGAATACACGACGCTCTTCCGATCTNNNNNNNGACGGAAGGTCCTTG
16	AGAATACACGACGCTCTTCCGATCT	NNNNNNN	GGTCCTTG		AGAATACACGACGCTCTTCCGATCTNNNNNNNCACACGAGGTCCTTG
17	AGAATACACGACGCTCTTCCGATCT	NNNNNNN	GGTCCTTG		AGAATACACGACGCTCTTCCGATCTNNNNNNNATGAGGAGGTCCTTG
18	AGAATACACGACGCTCTTCCGATCT	NNNNNNN	GGTCCTTG		AGAATACACGACGCTCTTCCGATCTNNNNNNNCTGCAGAGGTCCTTG
19	AGAATACACGACGCTCTTCCGATCT	NNNNNNN	GGTCCTTG		AGAATACACGACGCTCTTCCGATCTNNNNNNNACCAGAAGGTCCTTG
20	AGAATACACGACGCTCTTCCGATCT	NNNNNNN	GGTCCTTG		AGAATACACGACGCTCTTCCGATCTNNNNNNNATAGCGAGGTCCTTG
21	AGAATACACGACGCTCTTCCGATCT	NNNNNNN	GGTCCTTG		AGAATACACGACGCTCTTCCGATCTNNNNNNNGTGGCTAGGTCCTTG
22	AGAATACACGACGCTCTTCCGATCT	NNNNNNN	GGTCCTTG		AGAATACACGACGCTCTTCCGATCTNNNNNNNGGACAGAGGTCCTTG
23	AGAATACACGACGCTCTTCCGATCT	NNNNNNN	GGTCCTTG		AGAATACACGACGCTCTTCCGATCTNNNNNNNCGTAGCAGGTCCTTG
24	AGAATACACGACGCTCTTCCGATCT	NNNNNNN	GGTCCTTG		AGAATACACGACGCTCTTCCGATCTNNNNNNNGAGCGTAGGTCCTTG
25	AGAATACACGACGCTCTTCCGATCT	NNNNNNN	GGTCCTTG		AGAATACACGACGCTCTTCCGATCTNNNNNNNCGTCCTAGGTCCTTG
26	AGAATACACGACGCTCTTCCGATCT	NNNNNNN	GGTCCTTG		AGAATACACGACGCTCTTCCGATCTNNNNNNNCCTACAAGGTCCTTG
27	AGAATACACGACGCTCTTCCGATCT	NNNNNNN	GGTCCTTG		AGAATACACGACGCTCTTCCGATCTNNNNNNNTCCATGAGGTCCTTG
28	AGAATACACGACGCTCTTCCGATCT	NNNNNNN	GGTCCTTG		AGAATACACGACGCTCTTCCGATCTNNNNNNNTGGAACAGGTCCTTG
29	AGAATACACGACGCTCTTCCGATCT	NNNNNNN	GGTCCTTG		AGAATACACGACGCTCTTCCGATCTNNNNNNNACAACCAGGTCCTTG
30	AGAATACACGACGCTCTTCCGATCT	NNNNNNN	GGTCCTTG		AGAATACACGACGCTCTTCCGATCTNNNNNNNCCATTCAGGTCCTTG
31	AGAATACACGACGCTCTTCCGATCT	NNNNNNN	GGTCCTTG		AGAATACACGACGCTCTTCCGATCTNNNNNNNCAGAGAAGGTCCTTG
32	AGAATACACGACGCTCTTCCGATCT	NNNNNNN	GGTCCTTG		AGAATACACGACGCTCTTCCGATCTNNNNNNNTGGTCTAGGTCCTTG
33	AGAATACACGACGCTCTTCCGATCT	NNNNNNN	GGTCCTTG		AGAATACACGACGCTCTTCCGATCTNNNNNNNAGAGACAGGTCCTTG
34	AGAATACACGACGCTCTTCCGATCT	NNNNNNN	GGTCCTTG		AGAATACACGACGCTCTTCCGATCTNNNNNNNTCACACAGGTCCTTG
35	AGAATACACGACGCTCTTCCGATCT	NNNNNNN	GGTCCTTG		AGAATACACGACGCTCTTCCGATCTNNNNNNNCACTACAGGTCCTTG
36	AGAATACACGACGCTCTTCCGATCT	NNNNNNN	GGTCCTTG		AGAATACACGACGCTCTTCCGATCTNNNNNNNGGTGTTAGGTCCTTG
37	AGAATACACGACGCTCTTCCGATCT	NNNNNNN	GGTCCTTG		AGAATACACGACGCTCTTCCGATCTNNNNNNNGGCTTGAGGTCCTTG
38	AGAATACACGACGCTCTTCCGATCT	NNNNNNN	GGTCCTTG		AGAATACACGACGCTCTTCCGATCTNNNNNNNGAATGGAGGTCCTTG
39	AGAATACACGACGCTCTTCCGATCT	NNNNNNN	GGTCCTTG		AGAATACACGACGCTCTTCCGATCTNNNNNNNGTAGGCAGGTCCTTG
40	AGAATACACGACGCTCTTCCGATCT	NNNNNNN	GGTCCTTG		AGAATACACGACGCTCTTCCGATCTNNNNNNNTCTCCGAGGTCCTTG
41	AGAATACACGACGCTCTTCCGATCT	NNNNNNN	GGTCCTTG		AGAATACACGACGCTCTTCCGATCTNNNNNNNAGCTCCAGGTCCTTG
42	AGAATACACGACGCTCTTCCGATCT	NNNNNNN	GGTCCTTG		AGAATACACGACGCTCTTCCGATCTNNNNNNNCCTGACAGGTCCTTG
43	AGAATACACGACGCTCTTCCGATCT	NNNNNNN	GGTCCTTG		AGAATACACGACGCTCTTCCGATCTNNNNNNNGGAAGAAGGTCCTTG
44	AGAATACACGACGCTCTTCCGATCT	NNNNNNN	GGTCCTTG		AGAATACACGACGCTCTTCCGATCTNNNNNNNATCCGCAGGTCCTTG
45	AGAATACACGACGCTCTTCCGATCT	NNNNNNN	GGTCCTTG		AGAATACACGACGCTCTTCCGATCTNNNNNNNGCCTGTAGGTCCTTG
46	AGAATACACGACGCTCTTCCGATCT	NNNNNNN	GGTCCTTG		AGAATACACGACGCTCTTCCGATCTNNNNNNNTGGCGAAGGTCCTTG
47	AGAATACACGACGCTCTTCCGATCT	NNNNNNN	GGTCCTTG		AGAATACACGACGCTCTTCCGATCTNNNNNNNGCAGTGAGGTCCTTG
48	AGAATACACGACGCTCTTCCGATCT	NNNNNNN	GGTCCTTG		AGAATACACGACGCTCTTCCGATCTNNNNNNNGAACCAAGGTCCTTG
49	AGAATACACGACGCTCTTCCGATCT	NNNNNNN	GGTCCTTG		AGAATACACGACGCTCTTCCGATCTNNNNNNNTAGGAGTGGTCCTTG
50	AGAATACACGACGCTCTTCCGATCT	NNNNNNN	GGTCCTTG		AGAATACACGACGCTCTTCCGATCTNNNNNNNCTGGACTGGTCCTTG
51	AGAATACACGACGCTCTTCCGATCT	NNNNNNN	GGTCCTTG		AGAATACACGACGCTCTTCCGATCTNNNNNNNGTTCGCTGGTCCTTG
52	AGAATACACGACGCTCTTCCGATCT	NNNNNNN	GGTCCTTG		AGAATACACGACGCTCTTCCGATCTNNNNNNNTTGCCTTGGTCCTTG
53	AGAATACACGACGCTCTTCCGATCT	NNNNNNN	GGTCCTTG		AGAATACACGACGCTCTTCCGATCTNNNNNNNATCACCTGGTCCTTG
54	AGAATACACGACGCTCTTCCGATCT	NNNNNNN	GGTCCTTG		AGAATACACGACGCTCTTCCGATCTNNNNNNNAATGCCTGGTCCTTG
55	AGAATACACGACGCTCTTCCGATCT	NNNNNNN	GGTCCTTG		AGAATACACGACGCTCTTCCGATCTNNNNNNNGGAATGTGGTCCTTG
56	AGAATACACGACGCTCTTCCGATCT	NNNNNNN	GGTCCTTG		AGAATACACGACGCTCTTCCGATCTNNNNNNNGCGGATTGGTCCTTG
57	AGAATACACGACGCTCTTCCGATCT	NNNNNNN	GGTCCTTG		AGAATACACGACGCTCTTCCGATCTNNNNNNNCTGTGGTGGTCCTTG
58	AGAATACACGACGCTCTTCCGATCT	NNNNNNN	GGTCCTTG		AGAATACACGACGCTCTTCCGATCTNNNNNNNCGATCCTGGTCCTTG
59	AGAATACACGACGCTCTTCCGATCT	NNNNNNN	GGTCCTTG		AGAATACACGACGCTCTTCCGATCTNNNNNNNTAAGGCTGGTCCTTG
60	AGAATACACGACGCTCTTCCGATCT	NNNNNNN	GGTCCTTG		AGAATACACGACGCTCTTCCGATCTNNNNNNNGCCACTTGGTCCTTG
61	AGAATACACGACGCTCTTCCGATCT	NNNNNNN	GGTCCTTG		AGAATACACGACGCTCTTCCGATCTNNNNNNNGGCCATTGGTCCTTG
62	AGAATACACGACGCTCTTCCGATCT	NNNNNNN	GGTCCTTG		AGAATACACGACGCTCTTCCGATCTNNNNNNNACGAGTTGGTCCTTG
63	AGAATACACGACGCTCTTCCGATCT	NNNNNNN	GGTCCTTG		AGAATACACGACGCTCTTCCGATCTNNNNNNNCGAGGTTGGTCCTTG
64	AGAATACACGACGCTCTTCCGATCT	NNNNNNN	GGTCCTTG		AGAATACACGACGCTCTTCCGATCTNNNNNNNTTCTGCTGGTCCTTG
65	AGAATACACGACGCTCTTCCGATCT	NNNNNNN	GGTCCTTG		AGAATACACGACGCTCTTCCGATCTNNNNNNNCAGGCTTGGTCCTTG
66	AGAATACACGACGCTCTTCCGATCT	NNNNNNN	GGTCCTTG		AGAATACACGACGCTCTTCCGATCTNNNNNNNTCCGGTTGGTCCTTG
67	AGAATACACGACGCTCTTCCGATCT	NNNNNNN	GGTCCTTG		AGAATACACGACGCTCTTCCGATCTNNNNNNNATGGCATGGTCCTTG
68	AGAATACACGACGCTCTTCCGATCT	NNNNNNN	GGTCCTTG		AGAATACACGACGCTCTTCCGATCTNNNNNNNTGCGTGTGGTCCTTG
69	AGAATACACGACGCTCTTCCGATCT	NNNNNNN	GGTCCTTG		AGAATACACGACGCTCTTCCGATCTNNNNNNNGCGTTGTGGTCCTTG
70	AGAATACACGACGCTCTTCCGATCT	NNNNNNN	GGTCCTTG		AGAATACACGACGCTCTTCCGATCTNNNNNNNGGTGAATGGTCCTTG
71	AGAATACACGACGCTCTTCCGATCT	NNNNNNN	GGTCCTTG		AGAATACACGACGCTCTTCCGATCTNNNNNNNGAGAGCTGGTCCTTG
72	AGAATACACGACGCTCTTCCGATCT	NNNNNNN	GGTCCTTG		AGAATACACGACGCTCTTCCGATCTNNNNNNNACTCTGTGGTCCTTG
73	AGAATACACGACGCTCTTCCGATCT	NNNNNNN	GGTCCTTG		AGAATACACGACGCTCTTCCGATCTNNNNNNNGATCCTTGGTCCTTG
74	AGAATACACGACGCTCTTCCGATCT	NNNNNNN	GGTCCTTG		AGAATACACGACGCTCTTCCGATCTNNNNNNNAGCCGATGGTCCTTG
75	AGAATACACGACGCTCTTCCGATCT	NNNNNNN	GGTCCTTG		AGAATACACGACGCTCTTCCGATCTNNNNNNNACCGACTGGTCCTTG
76	AGAATACACGACGCTCTTCCGATCT	NNNNNNN	GGTCCTTG		AGAATACACGACGCTCTTCCGATCTNNNNNNNAACAGGTGGTCCTTG
77	AGAATACACGACGCTCTTCCGATCT	NNNNNNN	GGTCCTTG		AGAATACACGACGCTCTTCCGATCTNNNNNNNAGGATCTGGTCCTTG
78	AGAATACACGACGCTCTTCCGATCT	NNNNNNN	GGTCCTTG		AGAATACACGACGCTCTTCCGATCTNNNNNNNGCACGTTGGTCCTTG
79	AGAATACACGACGCTCTTCCGATCT	NNNNNNN	GGTCCTTG		AGAATACACGACGCTCTTCCGATCTNNNNNNNGAGCAATGGTCCTTG
80	AGAATACACGACGCTCTTCCGATCT	NNNNNNN	GGTCCTTG		AGAATACACGACGCTCTTCCGATCTNNNNNNNGGTACCTGGTCCTTG
81	AGAATACACGACGCTCTTCCGATCT	NNNNNNN	GGTCCTTG		AGAATACACGACGCTCTTCCGATCTNNNNNNNCTAGTGTGGTCCTTG
82	AGAATACACGACGCTCTTCCGATCT	NNNNNNN	GGTCCTTG		AGAATACACGACGCTCTTCCGATCTNNNNNNNTCAGCGTGGTCCTTG
83	AGAATACACGACGCTCTTCCGATCT	NNNNNNN	GGTCCTTG		AGAATACACGACGCTCTTCCGATCTNNNNNNNTGGAGGTGGTCCTTG
84	AGAATACACGACGCTCTTCCGATCT	NNNNNNN	GGTCCTTG		AGAATACACGACGCTCTTCCGATCTNNNNNNNCGCTAGTGGTCCTTG
85	AGAATACACGACGCTCTTCCGATCT	NNNNNNN	GGTCCTTG		AGAATACACGACGCTCTTCCGATCTNNNNNNNCTGCTATGGTCCTTG
86	AGAATACACGACGCTCTTCCGATCT	NNNNNNN	GGTCCTTG		AGAATACACGACGCTCTTCCGATCTNNNNNNNTCGACATGGTCCTTG
87	AGAATACACGACGCTCTTCCGATCT	NNNNNNN	GGTCCTTG		AGAATACACGACGCTCTTCCGATCTNNNNNNNAGGCAGTGGTCCTTG
88	AGAATACACGACGCTCTTCCGATCT	NNNNNNN	GGTCCTTG		AGAATACACGACGCTCTTCCGATCTNNNNNNNACATGGTGGTCCTTG
89	AGAATACACGACGCTCTTCCGATCT	NNNNNNN	GGTCCTTG		AGAATACACGACGCTCTTCCGATCTNNNNNNNACGTCCTGGTCCTTG
90	AGAATACACGACGCTCTTCCGATCT	NNNNNNN	GGTCCTTG		AGAATACACGACGCTCTTCCGATCTNNNNNNNCAGTTCTGGTCCTTG
91	AGAATACACGACGCTCTTCCGATCT	NNNNNNN	GGTCCTTG		AGAATACACGACGCTCTTCCGATCTNNNNNNNCAACGGTGGTCCTTG
92	AGAATACACGACGCTCTTCCGATCT	NNNNNNN	GGTCCTTG		AGAATACACGACGCTCTTCCGATCTNNNNNNNCGCACATGGTCCTTG
93	AGAATACACGACGCTCTTCCGATCT	NNNNNNN	GGTCCTTG		AGAATACACGACGCTCTTCCGATCTNNNNNNNGGTTGGTGGTCCTTG
94	AGAATACACGACGCTCTTCCGATCT	NNNNNNN	GGTCCTTG		AGAATACACGACGCTCTTCCGATCTNNNNNNNCCAGAATGGTCCTTG
95	AGAATACACGACGCTCTTCCGATCT	NNNNNNN	GGTCCTTG		AGAATACACGACGCTCTTCCGATCTNNNNNNNCTTCCGTGGTCCTTG
96	AGAATACACGACGCTCTTCCGATCT	NNNNNNN	GGTCCTTG		AGAATACACGACGCTCTTCCGATCTNNNNNNNGCATACTGGTCCTTG
