# Supplementary material for: An improved bacterial single-cell RNA-seq reveals biofilm heterogeneity
Source: eLife. 2024 Dec 17;13:RP97543. doi: 10.7554/eLife.97543 (PMC11651652; doi:10.7554/eLife.97543)
Supplement: Supplementary file 2. — The specific calculation process for multiplet frequency. [file elife-97543-supp2.xls]

## Sheet: Sheet1
1. Definition: In our study, multiplet frequency is defined as the probability of a non-empty barcode corresponding to more than one cell.
2. Calculation Method: We use a Poisson distribution-based approach to calculate the predicted multiplet frequency. The process involves several steps:
We first calculate the proportion of barcodes corresponding to zero cells: P(0)=
Then, we calculate the proportion corresponding to one cell:P(1)=
We derive the proportion for more than zero cells: P(≥1) = 1 - P(0). And for more than one cell: P(≥2) = 1 - P(1) - P(0). Finally, the multiplet frequency is calculated as:
3. Parameter λ: This is the ratio of the number of cells to the total number of possible barcode combinations. For instance, when detecting 10,000 cells,
sample	sample-ID	λ	P(0)	P(1)	P(≥1)	P(≥2)	Multiplet frequency
SA	0609-7	0.0339084	0.96667	0.03277	0.03333	0.00056	0.0168017
CC	0129-3	0.0339084	0.96667	0.03277	0.03333	0.00056	0.0168017
Ecoli control	0615-2	0.0452112	0.95581	0.0432	0.04419	0.00099	0.0224033
Ecoli remove rRNA	0427-3(5G)	0.056514	0.94507	0.05339	0.05493	0.00154	0.0280357
Ecoli 3h	0427-3(100G)	0.0678168	0.93444	0.06336	0.06556	0.0022	0.033557
Ecoli 24h sample1	1214-7	0.0226056	0.97765	0.02209	0.02235	0.00026	0.0116331
Ecoli 24h sample2	1214-8	0.0452112	0.95581	0.0432	0.04419	0.00099	0.0224033
