# Supplementary material for: An improved bacterial single-cell RNA-seq reveals biofilm heterogeneity
Source: eLife. 2024 Dec 17;13:RP97543. doi: 10.7554/eLife.97543 (PMC11651652; doi:10.7554/eLife.97543)
Supplement: Supplementary file 3. [file elife-97543-supp3.xls]

## Sheet: E. coli 3h rRNA and mRNA reads
						PETRI-seq				RiboD-PETRI						Non-rRNA ratio
Geneid	Chr	Start	End	Strand	Length	0615-1.r1	0615-1.r2	0615-2.r1	0615-2.r2	0427-3.r1	0427-3.r2	0427-4.r1	0427-4.r2			E. coli Ctrl	E. coli ΔΔ
b0001	Chromosome	190	255	+	66	40	36	31	24	69	83	28	30			0.0836	0.763
b0002	Chromosome	337	2799	+	2463	489	431	310	269	2220	2038	3468	3419			0.0808	0.816
b0003	Chromosome	2801	3733	+	933	124	134	81	98	724	600	796	745
b0004	Chromosome	3734	5020	+	1287	194	194	205	207	1497	1401	1842	1789
b0005	Chromosome	5234	5530	+	297	24	28	21	22	146	137	145	169
b0006	Chromosome	5683	6459	-	777	88	101	71	65	911	863	948	973
b0007	Chromosome	6529	7959	-	1431	130	141	68	93	387	788	919	1498
b0008	Chromosome	8238	9191	+	954	2000	1986	1566	1594	17718	17092	23019	22161
b0009	Chromosome	9306	9893	+	588	73	66	47	46	423	378	754	691
b0010	Chromosome	9928	10494	-	567	24	53	22	36	107	89	229	163
b0011	Chromosome	10643	11356	-	714	70	76	48	53	87	92	86	84
b0013	Chromosome	11382	11786	-	405	10	19	12	10	63	4	101	23
b0014	Chromosome	12163	14079	+	1917	4025	4042	3291	3226	32105	31287	42780	42045
b0015	Chromosome	14168	15298	+	1131	354	359	208	250	1414	1395	2374	2491
b0016	Chromosome	15445	16557	+	1113	72	73	51	53	277	290	456	427
b0018	Chromosome	16751	16960	-	210	8	7	0	0	4	7	58	33
b4412	Chromosome	16751	16903	-	153	0	0	0	2	0	0	0	0
b4413	Chromosome	16952	17006	+	55	7	6	0	2	28	4	62	80
b0019	Chromosome	17489	18655	+	1167	175	198	110	128	1077	944	1479	1419
b0020	Chromosome	18715	19620	+	906	34	43	37	45	400	215	328	183
b0021	Chromosome	19811	20314	-	504	8	12	16	11	26	24	20	13
b0022	Chromosome	20233	20508	-	276	2	5	1	3	6	16	1	2
b0023	Chromosome	20815	21078	-	264	41	38	44	47	393	395	448	428
b0024	Chromosome	21181	21399	+	219	11	12	5	3	5	12	4	6
b0025	Chromosome	21407	22348	+	942	164	157	120	129	1343	1519	1553	1599
b0026	Chromosome	22391	25207	+	2817	1518	1537	1163	1187	10659	10203	16341	15937
b0027	Chromosome	25207	25701	+	495	76	90	67	65	655	593	772	685
b0028	Chromosome	25826	26275	+	450	91	114	72	105	530	507	281	253
b0029	Chromosome	26277	27227	+	951	142	138	94	109	770	761	762	757
b0030	Chromosome	27293	28207	+	915	694	692	630	624	6130	6059	8909	8894
b0031	Chromosome	28374	29195	+	822	163	172	121	149	1101	1038	2032	1973
b0032	Chromosome	29651	30799	+	1149	82	118	41	87	254	248	734	745
b0033	Chromosome	30817	34038	+	3222	251	278	227	213	774	781	1018	954
b0034	Chromosome	34300	34695	+	396	49	52	37	34	268	248	522	500
b0035	Chromosome	34781	35371	-	591	23	27	19	13	10	19	10	39
b0036	Chromosome	35377	36162	-	786	130	99	86	70	121	160	118	198
b0037	Chromosome	36271	37824	-	1554	106	94	70	57	139	110	68	98
b0038	Chromosome	37898	39115	-	1218	75	70	53	60	265	263	243	275
b0039	Chromosome	39244	40386	-	1143	72	82	47	50	161	169	253	223
b0040	Chromosome	40417	41931	-	1515	70	72	48	62	60	88	115	104
b0041	Chromosome	42403	43173	+	771	34	30	19	27	64	41	175	112
b0042	Chromosome	43188	44129	+	942	40	30	25	25	93	89	33	41
b0043	Chromosome	44180	45466	+	1287	56	84	30	41	83	91	118	152
b0044	Chromosome	45463	45750	+	288	12	10	5	14	6	4	5	10
b0045	Chromosome	45807	47138	+	1332	46	60	49	53	28	32	135	91
b0046	Chromosome	47246	47776	+	531	47	72	25	42	180	185	285	293
b0047	Chromosome	47769	49631	+	1863	163	183	112	125	263	316	359	387
b0048	Chromosome	49823	50302	+	480	15	17	24	23	88	93	213	210
b0049	Chromosome	50380	51222	-	843	146	170	78	87	954	912	1302	1270
b0050	Chromosome	51229	51606	-	378	56	74	43	47	428	423	787	765
b0051	Chromosome	51609	52430	-	822	130	143	122	138	900	861	1837	1563
b0052	Chromosome	52427	53416	-	990	109	133	110	128	492	509	766	834
b0053	Chromosome	53416	54702	-	1287	417	418	369	363	2594	2419	5481	5258
b0054	Chromosome	54755	57109	-	2355	581	636	476	491	5245	5017	7369	7326
b0055	Chromosome	57364	58179	+	816	44	60	36	45	107	325	154	435
b0058	Chromosome	59687	60346	-	660	29	27	42	48	426	301	340	212
b0059	Chromosome	60358	63264	-	2907	289	265	235	203	894	827	1505	1467
b0060	Chromosome	63429	65780	-	2352	189	316	139	199	1503	16160	2547	29826
b0061	Chromosome	65855	66550	-	696	29	25	19	31	78	87	83	71
b0062	Chromosome	66835	68337	-	1503	87	108	67	92	657	668	529	560
b0063	Chromosome	68348	70048	-	1701	94	96	80	75	574	400	1129	837
b0064	Chromosome	70387	71265	+	879	84	173	70	132	599	555	1100	1032
b0065	Chromosome	71351	72115	+	765	65	73	71	66	121	88	111	123
b0066	Chromosome	72229	72927	-	699	25	41	37	52	182	141	144	118
b0067	Chromosome	72911	74521	-	1611	228	210	163	181	132	229	153	322
b0068	Chromosome	74497	75480	-	984	63	100	45	43	150	161	324	302
b0069	Chromosome	75644	77299	-	1656	132	147	78	96	425	418	510	544
b4577	Chromosome	77367	77593	+	227	5	4	3	4	3	6	2	5
b4662	Chromosome	77388	77519	+	132	0	0	0	0	0	0	0	0
b0070	Chromosome	77621	78799	+	1179	47	54	56	69	264	272	124	125
b0071	Chromosome	78848	79453	-	606	37	83	34	58	303	272	142	121
b0072	Chromosome	79464	80864	-	1401	103	115	75	92	275	277	745	737
b0073	Chromosome	80867	81958	-	1092	45	46	36	40	75	77	157	127
b0074	Chromosome	81958	83529	-	1572	82	105	70	62	110	130	232	286
b0075	Chromosome	83622	83708	-	87	2	6	4	2	2	2	5	5
b0076	Chromosome	84368	85312	+	945	32	39	25	42	75	83	37	27
b0077	Chromosome	85630	87354	+	1725	89	103	103	104	393	385	641	725
b0078	Chromosome	87357	87848	+	492	120	219	83	187	104	107	117	82
b0080	Chromosome	88028	89032	+	1005	220	242	248	255	1814	1777	3656	3699
b0081	Chromosome	89634	90092	+	459	72	82	63	56	540	625	529	602
b0082	Chromosome	90094	91035	+	942	114	101	136	135	547	489	553	618
b0083	Chromosome	91032	91397	+	366	40	46	39	22	158	143	114	111
b0084	Chromosome	91413	93179	+	1767	143	156	148	160	958	923	1075	950
b0085	Chromosome	93166	94653	+	1488	221	391	227	315	1258	1248	2120	2180
b0086	Chromosome	94650	96008	+	1359	332	331	261	262	2418	2394	2986	2917
b0087	Chromosome	96002	97084	+	1083	311	310	246	248	1608	1553	2320	2226
b0088	Chromosome	97087	98403	+	1317	234	256	301	281	1710	1560	2590	2542
b0089	Chromosome	98403	99647	+	1245	213	232	137	138	711	714	948	914
b0090	Chromosome	99644	100711	+	1068	231	249	163	147	985	1011	1822	1894
b0091	Chromosome	100765	102240	+	1476	314	309	267	271	1949	1843	3100	2969
b0092	Chromosome	102233	103153	+	921	261	290	224	223	1537	1525	2275	2175
b0093	Chromosome	103155	103985	+	831	207	206	199	213	1560	1195	2367	1596
b0094	Chromosome	103982	105244	+	1263	440	556	365	498	3396	3277	3104	3027
b0095	Chromosome	105305	106456	+	1152	1801	1894	1395	1446	13751	13050	18234	17743
b0096	Chromosome	106557	107474	+	918	882	905	664	664	7537	7274	11698	11363
b0097	Chromosome	107705	108217	+	513	84	98	77	82	585	603	460	464
b0098	Chromosome	108279	110984	+	2706	1560	1529	1263	1220	11778	11681	14697	15013
b0099	Chromosome	111044	111433	+	390	25	24	11	10	55	47	146	149
b0101	Chromosome	111649	111846	-	198	35	34	23	24	31	418	229	956
b0102	Chromosome	111856	112599	-	744	80	78	67	60	253	229	768	732
b0103	Chromosome	112599	113219	-	621	52	47	30	41	113	174	217	223
b0104	Chromosome	113444	114487	+	1044	259	261	229	249	2121	2049	2643	2527
b0106	Chromosome	114522	115724	-	1203	35	27	30	41	121	127	58	60
b0107	Chromosome	115714	117099	-	1386	60	39	24	28	91	107	263	264
b0108	Chromosome	117109	117549	-	441	26	24	12	13	6	8	12	14
b0109	Chromosome	117752	118645	-	894	67	116	66	98	279	263	206	264
b0110	Chromosome	118733	119284	+	552	180	189	141	142	1628	1644	2407	2401
b0111	Chromosome	119281	120135	+	855	133	145	83	114	940	905	1120	1038
b0112	Chromosome	120178	121551	-	1374	85	97	70	96	371	325	174	265
b0113	Chromosome	122092	122856	+	765	49	101	71	78	546	530	589	575
b0114	Chromosome	123017	125680	+	2664	4841	4689	3991	3915	38830	38227	56201	55525
b0115	Chromosome	125695	127587	+	1893	2489	2514	1902	1929	18152	16879	24680	23840
b0116	Chromosome	127912	129336	+	1425	2739	2796	2279	2259	23520	21286	34656	32240
b0117	Chromosome	129407	131260	-	1854	87	116	64	67	35	35	172	154
b0118	Chromosome	131615	134212	+	2598	5918	5936	4568	4616	42428	40470	60277	58472
b0119	Chromosome	134388	134750	+	363	134	137	108	116	935	877	1136	993
b0120	Chromosome	134788	135582	-	795	122	122	104	123	826	814	1389	1271
b0121	Chromosome	135598	136464	-	867	145	217	150	201	1159	1150	2156	2162
b0122	Chromosome	136570	136917	-	348	35	24	17	19	10	17	18	33
b0123	Chromosome	137083	138633	+	1551	93	102	73	90	394	370	432	449
b0124	Chromosome	138835	141225	-	2391	110	149	106	107	518	525	463	514
b0125	Chromosome	141431	141967	+	537	213	244	175	190	1074	1069	2140	2213
b0126	Chromosome	142008	142670	-	663	126	121	105	108	886	787	1222	1084
b0127	Chromosome	142779	143705	+	927	164	179	133	124	1036	1085	1442	1470
b0128	Chromosome	143702	144472	+	771	100	97	72	58	506	505	660	696
b0129	Chromosome	144577	145017	+	441	162	176	151	142	1300	1200	1705	1564
b0130	Chromosome	145081	146310	+	1230	58	58	41	46	83	355	157	555
b0131	Chromosome	146314	146694	-	381	126	126	57	56	437	419	1331	1296
b0132	Chromosome	146968	147870	+	903	45	39	27	37	142	125	145	108
b0133	Chromosome	147944	148795	-	852	261	273	223	220	1897	1802	2353	2290
b0134	Chromosome	148807	149601	-	795	197	197	137	151	1349	1210	1469	1180
b0135	Chromosome	149715	150953	-	1239	45	46	32	38	31	42	46	38
b0136	Chromosome	151003	151599	-	597	32	74	14	43	31	39	30	43
b0137	Chromosome	151626	152231	-	606	31	45	24	31	33	39	91	93
b0138	Chromosome	152243	152812	-	570	17	29	16	25	8	8	17	15
b0139	Chromosome	152829	155426	-	2598	70	91	68	61	99	184	99	196
b0140	Chromosome	155461	156201	-	741	29	33	21	23	71	81	30	66
b0141	Chromosome	156299	156883	-	585	32	30	16	23	28	31	64	64
b0142	Chromosome	157253	157732	-	480	23	41	21	47	11	10	45	100
b0143	Chromosome	157729	159126	-	1398	333	284	188	159	721	742	1508	1461
b0144	Chromosome	159186	160112	-	927	63	57	40	39	262	233	224	246
b0145	Chromosome	160149	160604	-	456	269	288	220	209	2539	2294	3179	2912
b0146	Chromosome	160782	161486	-	705	321	372	249	298	2409	2456	2504	2473
b0147	Chromosome	161501	162031	-	531	33	32	19	27	137	137	12	26
b0148	Chromosome	162105	164534	+	2430	204	243	124	149	666	667	744	717
b0149	Chromosome	164730	167264	+	2535	388	401	270	284	1344	1323	1729	1766
b0150	Chromosome	167484	169727	+	2244	88	106	75	72	186	180	244	255
b0151	Chromosome	169778	170575	+	798	32	34	28	39	233	223	205	200
b0152	Chromosome	170575	171465	+	891	47	38	31	34	29	30	26	20
b0153	Chromosome	171462	173444	+	1983	169	163	140	141	142	198	241	255
b0154	Chromosome	173602	174882	-	1281	280	300	240	224	2466	2386	3683	3604
b0155	Chromosome	175107	176528	+	1422	173	182	136	159	856	830	1311	1256
b0156	Chromosome	176610	176954	+	345	123	109	68	67	384	365	504	586
b0157	Chromosome	177001	177624	-	624	36	45	26	41	87	90	194	190
b0158	Chromosome	177662	178462	-	801	109	116	92	76	275	359	310	410
b0159	Chromosome	178455	179153	-	699	333	358	238	244	2311	2269	2949	2891
b0160	Chromosome	179237	180754	+	1518	126	106	91	97	358	333	1163	1012
b0161	Chromosome	180884	182308	+	1425	347	336	219	230	2257	2220	3187	3211
b0162	Chromosome	182463	183620	+	1158	215	219	181	185	1183	1093	1940	1913
b0163	Chromosome	183709	184095	-	387	77	85	63	69	629	574	1084	1075
b0164	Chromosome	184257	185069	-	813	59	57	32	41	124	121	179	143
b0166	Chromosome	185123	185947	-	825	642	645	408	416	3993	3802	5325	5255
b0167	Chromosome	185978	188650	-	2673	178	211	127	165	886	876	1408	1399
b0168	Chromosome	188712	189506	-	795	187	195	170	172	1286	1190	2131	2078
b4414	Chromosome	189712	189847	+	136	2664	2589	2203	2086	17894	22586	23597	29786
b0169	Chromosome	189874	190599	+	726	1876	1901	1501	1534	18176	12599	26921	20496
b0170	Chromosome	190857	191708	+	852	1033	1045	895	869	8761	8216	13702	13276
b0171	Chromosome	191855	192580	+	726	221	211	123	126	1138	1139	1555	1608
b0172	Chromosome	192872	193429	+	558	433	438	322	312	3895	3530	5296	4878
b0173	Chromosome	193521	194717	+	1197	124	146	98	92	461	414	927	958
b0174	Chromosome	194903	195664	+	762	109	102	69	72	702	663	572	543
b0175	Chromosome	195677	196534	+	858	145	172	138	139	1120	1042	929	966
b0176	Chromosome	196546	197898	+	1353	297	295	242	245	1430	1367	1748	1691
b0177	Chromosome	197928	200360	+	2433	1330	1301	983	999	8264	8040	15094	15052
b0178	Chromosome	200482	200967	+	486	493	495	370	382	3560	3477	6162	6417
b0179	Chromosome	200971	201996	+	1026	450	440	302	302	2844	2630	3964	3706
b0180	Chromosome	202101	202556	+	456	137	125	102	95	1380	1190	1323	1388
b0181	Chromosome	202560	203348	+	789	160	173	162	176	1260	1183	1517	1386
b0182	Chromosome	203348	204496	+	1149	116	143	104	119	655	619	626	605
b0183	Chromosome	204493	205089	+	597	86	82	69	66	325	322	875	834
b0184	Chromosome	205126	208608	+	3483	443	415	324	312	1235	1293	2307	2400
b0185	Chromosome	208621	209580	+	960	423	437	279	278	3375	3165	5344	4979
b0186	Chromosome	209679	211820	+	2142	432	298	291	192	2186	2014	2625	2461
b0187	Chromosome	211877	212266	+	390	50	46	23	23	131	109	208	221
b0188	Chromosome	212331	213629	+	1299	75	81	56	66	167	183	509	479
b0189	Chromosome	213678	213932	-	255	102	93	53	60	456	266	627	585
b4406	Chromosome	213925	214125	-	201	175	192	120	124	496	566	515	546
b0190	Chromosome	214291	214836	+	546	127	116	74	72	546	510	959	1023
b0191	Chromosome	214833	215255	+	423	107	92	54	50	390	326	711	638
b0192	Chromosome	215269	215979	+	711	113	136	48	62	597	568	1157	1072
b0193	Chromosome	216179	217003	-	825	47	42	33	28	47	23	168	174
b0194	Chromosome	217057	218775	-	1719	434	441	338	344	3082	2855	4148	4062
b0195	Chromosome	218887	219594	-	708	57	64	25	33	321	386	44	86
b0196	Chromosome	219591	219995	-	405	134	131	68	70	1266	1267	2004	1989
b0197	Chromosome	220113	220928	-	816	195	215	180	200	1137	1124	2151	2096
b0198	Chromosome	220968	221621	-	654	29	41	44	40	189	150	725	658
b0199	Chromosome	221614	222645	-	1032	77	70	35	53	204	181	395	406
b0200	Chromosome	222833	223408	+	576	105	119	93	111	409	446	962	1004
b0201	Chromosome	223771	225312	+	1542	784551	763203	635342	620998	54264	44970	110201	97788
b0202	Chromosome	225381	225457	+	77	73	74	83	62	389	328	506	394
b0203	Chromosome	225500	225575	+	76	684	940	573	693	2388	1001	3453	1819
b0204	Chromosome	225759	228662	+	2904	1624649	1552599	1342919	1283734	222787	188967	424053	382982
b0205	Chromosome	228756	228875	+	120	221	247	211	222	1285	1019	1512	1343
b0206	Chromosome	228928	229004	+	77	558	734	498	618	685	326	1219	645
b0207	Chromosome	229167	229970	+	804	62	74	34	50	290	212	533	406
b0208	Chromosome	229967	230881	-	915	57	51	44	38	315	316	360	389
b0209	Chromosome	231122	231922	+	801	104	122	63	77	683	664	608	590
b0210	Chromosome	231926	232549	+	624	80	58	56	29	150	156	171	157
b0211	Chromosome	232597	233955	-	1359	145	173	150	160	778	818	1525	1567
b0212	Chromosome	234027	234782	-	756	193	197	161	168	653	739	846	907
b0213	Chromosome	234816	235538	+	723	67	63	29	41	185	195	142	165
b0214	Chromosome	235535	236002	-	468	25	45	28	40	181	175	257	238
b0215	Chromosome	236067	236798	+	732	48	50	56	54	627	547	1255	1190
b0216	Chromosome	236931	237007	+	77	634	837	455	592	659	368	1282	681
b0217	Chromosome	237335	238120	+	786	80	111	61	91	102	113	205	178
b4586	Chromosome	238257	238736	-	480	49	42	36	37	57	37	130	57
b0218	Chromosome	238746	239102	-	357	24	15	11	18	11	6	31	14
b4503	Chromosome	239106	239378	+	273	4	15	4	16	18	15	8	5
b0219	Chromosome	239419	240189	-	771	103	98	56	64	293	298	347	325
b0220	Chromosome	240343	240816	+	474	446	444	373	365	1014	946	1105	999
b0221	Chromosome	240859	243303	-	2445	115	128	88	103	248	231	246	269
b0222	Chromosome	243543	244121	+	579	427	389	414	355	1952	2197	2226	2675
b0223	Chromosome	244327	245094	+	768	83	69	57	54	362	352	471	448
b0224	Chromosome	245065	245805	-	741	34	42	27	33	138	163	108	105
b0225	Chromosome	245961	246239	-	279	17	23	19	27	27	23	84	106
b0226	Chromosome	246242	246502	-	261	87	85	51	54	549	534	379	386
b0227	Chromosome	246712	247461	+	750	28	48	25	36	62	52	44	81
b0228	Chromosome	247637	248134	+	498	23	27	32	37	121	128	99	91
b0229	Chromosome	248358	250070	-	1713	81	91	61	80	37	55	255	214
b0230	Chromosome	250072	250827	+	756	43	39	24	24	33	27	16	32
b0231	Chromosome	250898	251953	+	1056	158	96	124	70	236	204	284	292
b0232	Chromosome	252005	252298	+	294	23	34	14	19	53	81	136	153
b0233	Chromosome	252301	252699	+	399	32	19	12	11	51	43	41	20
b0234	Chromosome	252709	253161	+	453	25	13	12	14	15	19	18	25
b0235	Chromosome	253479	253685	+	207	2	6	7	5	2	6	3	1
b0236	Chromosome	253702	254202	+	501	14	21	17	19	52	22	27	24
b0237	Chromosome	254259	255716	-	1458	1944	1882	1651	1656	16146	15468	20894	20481
b0238	Chromosome	255977	256435	+	459	32	37	24	24	204	270	561	571
b0239	Chromosome	256527	257771	+	1245	143	141	85	81	733	824	638	721
b0241	Chromosome	259045	260100	-	1056	52	46	47	37	54	100	129	142
b0242	Chromosome	260388	261491	+	1104	169	187	106	121	657	593	1244	1203
b0243	Chromosome	261503	262756	+	1254	252	268	166	178	1924	1835	2856	2759
b0244	Chromosome	262871	262946	+	76	192	116	173	70	130	73	189	141
b4626	Chromosome	263150	263212	-	63	0	6	2	4	0	3	2	4
b0245	Chromosome	263328	263669	-	342	23	209	22	171	58	58	12	10
b0246	Chromosome	263690	264007	-	318	17	30	10	14	3	10	8	18
b4504	Chromosome	264026	264247	-	222	7	9	4	3	2	1	37	61
b0247	Chromosome	264256	264732	-	477	18	30	11	23	10	15	25	32
b0248	Chromosome	264748	265206	-	459	42	41	27	32	196	180	16	21
b0249	Chromosome	265304	265543	-	240	10	18	9	15	67	66	36	77
b0250	Chromosome	265620	266087	-	468	24	22	30	36	109	154	400	317
b0251	Chromosome	266110	266553	-	444	26	32	26	23	25	46	209	218
b4627	Chromosome	266553	266774	-	222	10	7	6	7	240	65	295	42
b4628	Chromosome	266776	266967	-	192	4	4	4	3	6	4	20	7
b0252	Chromosome	267184	268005	-	822	38	49	50	57	239	212	395	334
b0253	Chromosome	268097	268960	-	864	37	43	33	42	26	23	262	217
b0254	Chromosome	269289	270182	-	894	31	31	23	31	53	59	12	25
b0256	Chromosome	270603	271754	+	1152	56	43	30	30	292	237	368	413
b4690	Chromosome	272580	272654	+	75	6	6	1	2	62	45	1	1
b0258	Chromosome	272847	273954	+	1108	59	73	34	59	96	64	37	34
b0259	Chromosome	274101	275117	-	1017	138	137	92	113	1201	1077	1552	1451
b0260	Chromosome	275325	276728	+	1404	50	61	45	48	94	55	120	80
b0261	Chromosome	276715	277647	+	933	123	130	81	86	325	317	725	713
b0262	Chromosome	277756	278802	-	1047	78	81	53	57	78	80	36	35
b0263	Chromosome	278814	279161	-	348	50	30	27	33	44	54	6	13
b0264	Chromosome	279178	279681	-	504	11	8	6	8	33	40	24	19
b0265	Chromosome	279600	279875	-	276	3	3	3	4	14	19	1	1
b4708	Chromosome	279931	280104	+	174	3	6	5	3	16	14	30	13
b4505	Chromosome	280114	280362	-	249	22	19	23	31	14	38	203	167
b0266	Chromosome	280427	280735	-	309	13	19	15	23	92	99	307	357
b0267	Chromosome	280829	281983	-	1155	61	89	62	51	74	86	107	116
b0268	Chromosome	282278	283186	+	909	114	99	112	100	267	251	658	605
b0269	Chromosome	283201	285168	+	1968	235	280	203	223	196	244	733	785
b0270	Chromosome	285395	286777	+	1383	153	177	118	113	248	235	280	280
b0271	Chromosome	286789	288399	+	1611	133	144	113	114	368	383	558	559
b0272	Chromosome	288404	289162	-	759	77	69	60	61	139	298	25	309
b0273	Chromosome	289301	290305	-	1005	89	84	76	74	266	238	421	371
b4688	Chromosome	290429	290633	+	205	7	15	2	10	21	2	2	7
b0274	Chromosome	290649	291152	-	504	14	10	7	10	30	42	22	23
b0275	Chromosome	291071	291346	-	276	8	4	4	3	11	18	1	0
b0276	Chromosome	291404	292231	+	828	65	59	43	39	64	22	144	152
b0277	Chromosome	292322	292948	-	627	27	30	28	26	19	15	125	59
b0278	Chromosome	293220	293918	-	699	46	62	32	47	39	49	161	150
b0279	Chromosome	293945	294799	-	855	54	48	42	52	16	24	42	52
b0280	Chromosome	295139	295579	-	441	39	48	29	36	17	11	460	416
b0281	Chromosome	295696	297096	-	1401	83	137	85	82	945	883	1548	1390
b4629	Chromosome	297206	297254	+	49	26	20	10	14	93	27	115	89
b4694	Chromosome	297381	297719	-	339	27	33	18	22	6	5	9	13
b4695	Chromosome	297714	297791	-	78	0	2	1	0	0	0	0	0
b0283	Chromosome	297770	298726	-	957	68	60	44	49	73	74	197	204
b0284	Chromosome	298736	300934	-	2199	110	162	92	126	364	342	373	395
b0285	Chromosome	300931	301887	-	957	90	77	46	53	124	112	31	62
b0286	Chromosome	301884	302573	-	690	31	29	31	36	17	80	92	152
b0287	Chromosome	302991	303605	+	615	59	68	53	41	303	793	364	1369
b0288	Chromosome	303853	304182	-	330	14	13	12	15	10	7	91	99
b0289	Chromosome	304495	305205	-	711	24	29	23	26	31	54	150	162
b0290	Chromosome	305174	306817	-	1644	109	154	76	80	133	694	141	1224
b0291	Chromosome	306807	309332	-	2526	95	143	86	98	125	138	247	239
b0292	Chromosome	309358	310026	-	669	26	33	41	36	65	119	14	111
b0293	Chromosome	310084	310671	-	588	28	39	25	21	105	144	121	221
b0294	Chromosome	310746	311336	-	591	27	20	14	18	14	16	28	25
b0295	Chromosome	312112	312339	+	228	20	10	7	11	4	6	8	9
b4506	Chromosome	312374	312514	-	141	5	16	5	13	2	2	5	3
b0296	Chromosome	312514	312777	-	264	9	8	4	5	8	10	11	17
b4671	Chromosome	313141	313242	-	102	33	38	17	21	116	97	263	248
b4630	Chromosome	313716	313805	-	90	3	2	0	3	6	3	1	7
b0297	Chromosome	314357	315228	+	872	88	65	62	70	23	21	24	28
b0298	Chromosome	315291	315590	+	300	9	11	8	7	32	33	91	98
b0299	Chromosome	315587	316453	+	867	29	33	17	25	180	158	212	184
b0300	Chromosome	316486	317169	-	684	38	37	24	37	20	35	177	187
b4631	Chromosome	317439	317567	+	129	8	10	6	6	5	6	9	5
b0301	Chromosome	317726	318319	-	594	35	37	18	14	168	96	32	17
b0303	Chromosome	318331	318567	-	237	20	17	10	9	24	13	28	33
b0304	Chromosome	318676	320001	-	1326	93	84	60	62	215	247	294	281
b0305	Chromosome	320227	321081	+	855	32	39	26	26	27	34	256	274
b0306	Chromosome	321608	322327	+	720	455	382	378	315	2980	2563	3939	3599
b0307	Chromosome	322338	323765	+	1428	618	618	487	503	4119	3956	5954	5787
b0308	Chromosome	323758	324453	+	696	204	217	202	195	1505	970	2337	2101
b0310	Chromosome	324696	325364	-	669	45	82	38	61	53	39	69	58
b0311	Chromosome	325577	327247	-	1671	131	95	92	108	141	128	229	301
b0312	Chromosome	327261	328733	-	1473	96	104	80	89	610	606	470	415
b0313	Chromosome	328747	329334	-	588	30	24	26	19	53	58	106	116
b0314	Chromosome	329463	331496	+	2034	99	111	60	70	208	175	330	342
b0315	Chromosome	332371	333459	+	1089	120	90	88	72	90	233	182	358
b0316	Chromosome	333501	334433	-	933	35	33	28	27	116	114	96	93
b0317	Chromosome	334525	335022	-	498	26	30	34	30	81	109	45	135
b0318	Chromosome	335280	335885	+	606	24	34	14	13	52	117	126	236
b0319	Chromosome	335925	336788	+	864	33	28	25	30	30	18	52	49
b0320	Chromosome	336778	338325	+	1548	79	99	70	67	92	94	184	180
b0321	Chromosome	338325	339743	+	1419	107	93	63	72	36	71	120	125
b0323	Chromosome	340165	341115	+	951	60	58	35	47	9	26	36	68
b0324	Chromosome	341125	342507	+	1383	96	109	65	71	311	365	295	409
b0325	Chromosome	342884	343933	+	1050	413	505	252	334	2034	1974	2889	2660
b0326	Chromosome	344176	344991	+	816	42	43	26	29	13	9	37	42
b0327	Chromosome	345404	345649	+	246	20	19	10	13	48	44	39	26
b0328	Chromosome	345666	346337	-	672	85	102	84	81	527	460	472	374
b0329	Chromosome	346484	346759	+	276	216	223	152	155	2239	2129	1684	1662
b0330	Chromosome	346857	348443	-	1587	86	104	66	85	19	25	156	86
b0331	Chromosome	348682	349572	+	891	39	56	35	32	33	33	102	134
b0333	Chromosome	350012	351181	+	1170	50	64	62	53	137	613	91	977
b0334	Chromosome	351215	352666	+	1452	48	61	43	54	81	103	47	99
b0335	Chromosome	352706	354592	+	1887	148	132	78	76	181	172	290	284
b0336	Chromosome	354922	356181	+	1260	75	85	32	44	191	172	448	474
b0337	Chromosome	356171	357454	+	1284	114	129	70	97	468	437	1149	1022
b0338	Chromosome	357791	358690	-	900	44	61	29	42	119	132	329	337
b0339	Chromosome	358799	359458	+	660	29	30	26	18	65	51	102	96
b0340	Chromosome	359489	359959	+	471	38	47	28	48	15	37	104	141
b0341	Chromosome	359992	361146	+	1155	73	89	57	52	20	37	102	94
b0342	Chromosome	361249	361860	-	612	32	34	34	24	46	60	66	97
b0343	Chromosome	361926	363179	-	1254	151	186	107	144	218	290	257	325
b0344	Chromosome	363231	366305	-	3075	212	220	167	190	623	640	1038	1121
b0345	Chromosome	366428	367510	-	1083	204	211	146	148	9603	9377	17667	17122
b0346	Chromosome	367587	368420	-	834	30	52	23	28	192	202	213	236
b0347	Chromosome	368611	370275	+	1665	65	70	51	54	55	40	26	38
b0348	Chromosome	370277	371221	+	945	47	46	24	29	31	29	95	51
b0349	Chromosome	371239	372105	+	867	27	34	20	24	19	29	46	31
b0350	Chromosome	372115	372924	+	810	25	35	15	17	72	70	101	40
b0351	Chromosome	372921	373871	+	951	33	47	24	40	17	25	152	118
b0352	Chromosome	373868	374881	+	1014	42	53	36	36	118	110	192	180
b0353	Chromosome	375459	376670	+	1212	54	120	58	122	115	114	380	353
b0354	Chromosome	376772	377311	+	540	39	36	28	43	252	180	202	111
b0355	Chromosome	377535	378368	-	834	93	90	32	43	171	196	222	261
b0356	Chromosome	378462	379571	-	1110	244	510	158	334	1318	1181	1691	1704
b0357	Chromosome	379606	379881	-	276	102	109	100	94	338	285	617	591
b0358	Chromosome	380069	380842	-	774	31	26	17	21	120	97	90	15
b0360	Chromosome	381351	381716	+	366	17	13	8	7	66	71	71	130
b0361	Chromosome	381674	382579	+	906	28	25	23	22	98	99	100	88
b0363	Chromosome	382739	383935	-	1197	80	68	52	51	187	102	159	107
b0364	Chromosome	384059	384616	-	558	20	33	17	18	107	135	123	147
b0365	Chromosome	385232	386194	+	963	35	49	49	35	24	32	21	33
b0366	Chromosome	386207	386974	+	768	29	34	21	22	58	28	40	41
b0367	Chromosome	386971	387798	+	828	52	61	26	42	20	34	44	67
b0368	Chromosome	387795	388646	+	852	34	38	18	40	18	29	44	72
b0369	Chromosome	388753	389727	-	975	214	212	172	165	1816	1747	1212	1268
b0372	Chromosome	391739	392605	-	867	24	32	24	30	175	152	192	192
b0373	Chromosome	392602	392901	-	300	13	12	9	8	26	46	111	74
b0375	Chromosome	394506	395129	+	624	24	32	21	13	17	21	16	31
b0376	Chromosome	395130	396287	-	1158	46	74	67	98	405	378	578	495
b0377	Chromosome	396639	397859	+	1221	58	99	41	74	183	208	283	296
b0378	Chromosome	397872	398966	+	1095	74	86	47	57	210	239	210	227
b0379	Chromosome	399025	399333	-	309	10	17	14	10	27	21	44	14
b0380	Chromosome	399593	399805	+	213	25	32	35	40	220	192	211	76
b0381	Chromosome	399829	400923	-	1095	283	301	198	209	1526	1368	1720	1530
b0382	Chromosome	401386	401646	+	261	68	72	35	39	99	127	297	323
b0383	Chromosome	401747	403162	+	1416	116	105	53	70	637	219	1071	391
b0384	Chromosome	403281	403601	+	321	27	24	26	25	141	138	154	147
b0385	Chromosome	403703	404818	+	1116	67	70	45	44	34	42	45	63
b0386	Chromosome	404835	405644	-	810	126	134	92	117	871	849	1201	1096
b0387	Chromosome	405764	406222	+	459	52	58	25	29	141	138	256	254
b0388	Chromosome	406405	406929	+	525	58	41	25	51	82	137	137	205
b0389	Chromosome	406979	407170	+	192	14	23	25	23	277	223	75	81
b0390	Chromosome	407428	408105	+	678	49	35	38	28	384	19	745	42
b0391	Chromosome	408177	408461	+	285	130	120	64	65	617	578	720	710
b0392	Chromosome	408609	408950	+	342	5	14	4	8	3	21	10	37
b0393	Chromosome	409108	410019	-	912	122	93	60	62	409	388	633	585
b0394	Chromosome	410144	411052	+	909	329	333	242	234	1867	1830	2613	2537
b0396	Chromosome	411297	412481	-	1185	60	73	37	32	41	37	125	121
b0397	Chromosome	412607	415753	-	3147	331	331	290	276	1354	1959	1918	2759
b0398	Chromosome	415750	416952	-	1203	71	112	30	51	429	436	250	358
b0399	Chromosome	417142	417831	+	690	31	43	32	34	86	137	103	106
b0400	Chromosome	417889	419184	+	1296	63	67	65	56	228	217	94	129
b0401	Chromosome	419591	420910	+	1320	267	249	195	208	1213	1187	1444	1471
b0402	Chromosome	420986	422359	+	1374	88	87	69	83	274	241	513	412
b0403	Chromosome	422518	424332	+	1815	117	179	102	137	229	246	530	484
b0404	Chromosome	424337	424918	-	582	35	43	27	29	245	734	54	1027
b0405	Chromosome	425011	426081	+	1071	65	87	79	81	419	451	705	815
b0406	Chromosome	426137	427264	+	1128	276	262	217	202	1916	2030	2425	2536
b0407	Chromosome	427287	427619	+	333	236	230	180	200	2358	2115	2498	2293
b0408	Chromosome	427647	429494	+	1848	425	432	331	323	2337	2453	3762	3873
b0409	Chromosome	429505	430476	+	972	377	389	262	277	2049	1695	3691	3184
b0410	Chromosome	430605	430952	+	348	45	41	33	22	359	350	266	271
b0411	Chromosome	431129	432013	-	885	648	689	560	570	6452	6199	8589	8327
b0412	Chromosome	432312	432851	-	540	31	26	12	26	56	22	122	33
b0413	Chromosome	433002	433451	+	450	93	81	73	83	319	359	360	376
b0414	Chromosome	433455	434558	+	1104	143	148	97	108	791	602	1012	943
b0415	Chromosome	434647	435117	+	471	129	136	117	121	941	946	805	859
b0416	Chromosome	435137	435556	+	420	102	110	76	74	694	794	778	756
b0417	Chromosome	435634	436611	+	978	81	85	68	87	547	515	892	847
b0418	Chromosome	436589	437107	+	519	137	141	149	143	893	733	1187	1140
b0419	Chromosome	437161	438135	-	975	196	211	152	167	1908	1677	2757	2538
b0420	Chromosome	438315	440177	-	1863	276	266	212	196	1912	1938	2094	2050
b0421	Chromosome	440202	441101	-	900	140	163	107	106	1066	953	1128	1243
b0422	Chromosome	441101	441343	-	243	101	129	87	77	571	502	1434	1141
b0423	Chromosome	441549	442997	+	1449	125	131	110	120	377	392	976	959
b0424	Chromosome	443051	443641	-	591	72	83	48	47	403	355	573	486
b0425	Chromosome	443604	444515	-	912	151	140	129	123	911	903	1190	1167
b0426	Chromosome	444683	445174	+	492	198	236	179	175	2012	1966	2072	2031
b0427	Chromosome	445302	446666	-	1365	99	80	70	47	169	175	378	406
b0428	Chromosome	446815	447705	-	891	81	85	58	76	297	334	287	275
b0429	Chromosome	447717	448046	-	330	19	16	17	21	83	80	254	199
b0430	Chromosome	448046	448660	-	615	78	71	53	61	260	293	570	527
b0431	Chromosome	448650	450641	-	1992	189	194	202	221	1133	1059	1790	1695
b0432	Chromosome	450663	451610	-	948	76	61	38	50	414	324	606	466
b0433	Chromosome	452070	453545	-	1476	74	96	62	90	229	230	329	334
b0434	Chromosome	453589	454167	-	579	85	93	55	56	297	258	655	627
b0435	Chromosome	454472	454789	+	318	260	287	209	214	1258	1249	3291	3078
b0436	Chromosome	455133	456431	+	1299	1575	1588	1381	1412	11636	10966	19373	18716
b0437	Chromosome	456677	457300	+	624	335	337	250	255	2476	2636	3550	3557
b0438	Chromosome	457426	458700	+	1275	683	664	513	532	5522	5408	7999	7887
b0439	Chromosome	458888	461242	+	2355	898	868	750	749	5761	5795	8414	8822
b0440	Chromosome	461451	461723	+	273	2720	3061	2260	2597	21933	12872	30104	20752
b0441	Chromosome	461915	463786	+	1872	354	409	300	327	3172	2997	3468	3318
b0442	Chromosome	463937	464308	+	372	15	15	24	26	81	67	62	62
b0443	Chromosome	464402	464800	+	399	18	13	15	13	7	7	27	20
b0444	Chromosome	464852	465547	-	696	74	93	41	44	537	550	494	482
b0445	Chromosome	465612	467312	-	1701	154	189	98	76	521	533	1365	1334
b0446	Chromosome	467412	468230	+	819	38	30	40	33	128	166	65	137
b0447	Chromosome	468383	468841	+	459	27	27	15	18	94	89	295	321
b0448	Chromosome	468871	470643	+	1773	126	109	95	68	109	148	615	678
b0449	Chromosome	470636	472417	+	1782	199	87	163	83	243	265	445	463
b0450	Chromosome	472598	472936	+	339	15	10	6	9	8	23	13	17
b0451	Chromosome	472966	474252	+	1287	59	73	42	49	27	38	190	170
b0452	Chromosome	474301	475161	-	861	68	95	35	49	293	292	301	290
b0453	Chromosome	475379	475951	+	573	85	82	74	67	503	506	495	488
b0454	Chromosome	475982	476371	-	390	35	34	26	47	48	35	56	29
b0455	Chromosome	476448	476561	+	114	327	323	245	264	9	19	77	31
b0456	Chromosome	476672	477025	+	354	18	12	6	9	11	11	13	17
b0457	Chromosome	477067	478617	-	1551	94	103	60	83	225	191	365	371
b0458	Chromosome	478781	479251	-	471	49	52	41	43	236	240	624	616
b0459	Chromosome	479367	479918	-	552	31	29	25	22	183	197	50	277
b0460	Chromosome	480090	480308	-	219	53	43	27	28	477	482	721	855
b0461	Chromosome	480334	480708	-	375	52	53	27	24	263	258	104	142
b0462	Chromosome	481254	484403	-	3150	1199	1234	934	961	8891	8521	10479	10072
b0463	Chromosome	484426	485619	-	1194	276	304	231	232	2250	2167	2535	2530
b0464	Chromosome	485761	486408	+	648	32	37	31	30	499	522	225	245
b0465	Chromosome	486536	489898	+	3363	259	260	174	199	1437	1204	2024	1422
b0466	Chromosome	490110	490271	-	162	12	17	12	5	63	64	122	149
b0467	Chromosome	490285	490812	-	528	64	64	58	60	178	137	515	505
b0468	Chromosome	490882	491259	+	378	14	24	24	22	120	247	78	305
b0469	Chromosome	491412	491963	+	552	25	37	36	30	179	165	277	260
b0470	Chromosome	492092	494023	+	1932	255	279	189	198	1029	1438	1174	1439
b0471	Chromosome	494076	494405	+	330	266	303	196	201	1671	1386	2005	1790
b0472	Chromosome	494405	495010	+	606	172	180	159	154	1502	1413	2357	2293
b0473	Chromosome	495120	496994	+	1875	1166	1134	990	957	10673	10208	14709	14474
b0474	Chromosome	497175	497819	+	645	281	276	224	218	1462	1422	2269	2234
b0475	Chromosome	498055	499017	+	963	102	95	83	72	410	385	335	344
b0476	Chromosome	499014	499973	-	960	88	102	61	52	467	432	554	508
b0477	Chromosome	500125	501429	+	1305	90	103	73	84	401	389	444	452
b0478	Chromosome	501562	503238	-	1677	221	237	167	174	861	844	1038	1032
b0479	Chromosome	503476	504696	-	1221	101	119	85	88	460	464	570	578
b0480	Chromosome	504914	506566	+	1653	531	523	407	423	2955	2917	4072	4148
b0481	Chromosome	506603	507082	-	480	48	41	15	15	137	99	47	86
b4585	Chromosome	507204	507287	+	84	13	28	7	12	30	21	20	21
b0482	Chromosome	507286	508080	-	795	43	51	39	53	227	206	218	210
b0483	Chromosome	508218	508559	+	342	41	61	25	22	226	215	492	440
b0484	Chromosome	508875	511379	-	2505	238	253	254	272	1128	1074	2071	2105
b0485	Chromosome	511641	512573	+	933	231	247	206	220	1607	1603	2416	2357
b0486	Chromosome	512576	513868	+	1293	134	171	119	175	686	703	229	437
b0487	Chromosome	513993	514400	+	408	123	125	108	103	809	754	1009	1004
b0488	Chromosome	514401	514859	-	459	56	65	34	24	88	83	257	228
b0489	Chromosome	514856	515773	-	918	97	119	74	77	382	374	1403	1367
b0490	Chromosome	515919	516596	+	678	28	26	49	44	152	113	271	203
b0491	Chromosome	516583	517362	+	780	36	38	35	39	167	185	217	219
b0492	Chromosome	517425	518279	-	855	118	105	140	158	676	669	780	792
b0493	Chromosome	518340	519149	-	810	72	65	52	56	229	222	155	185
b0494	Chromosome	519139	519765	-	627	43	43	37	47	203	220	155	184
b0495	Chromosome	519733	520419	+	687	61	64	53	78	141	146	374	345
b0496	Chromosome	520416	522830	+	2415	235	291	181	207	417	442	909	977
b0497	Chromosome	523261	527541	+	4281	227	318	190	220	479	540	246	235
b0498	Chromosome	527581	527949	+	369	33	57	20	40	82	64	97	96
b0499	Chromosome	527952	528659	+	708	49	47	30	31	52	84	32	90
b0501	Chromosome	528640	529130	+	491	73	122	44	79	174	155	271	275
b4632	Chromosome	529500	529592	+	93	2	2	13	7	7	8	0	3
b0503	Chromosome	530132	531226	-	1095	73	80	53	52	272	223	397	486
b0504	Chromosome	531295	532221	-	927	31	41	40	39	74	78	20	24
b0505	Chromosome	532451	532933	+	483	35	36	19	23	35	40	14	18
b0506	Chromosome	533011	533826	+	816	130	133	121	120	1570	1526	1387	1369
b0507	Chromosome	533916	535697	+	1782	113	132	70	125	225	213	139	171
b0508	Chromosome	535710	536486	+	777	44	75	41	48	204	236	185	212
b0509	Chromosome	536586	537464	+	879	42	43	31	25	146	175	227	217
b0511	Chromosome	537633	539087	+	1455	56	66	34	64	357	371	230	302
b0512	Chromosome	539147	540508	+	1362	82	101	50	59	407	385	358	392
b0513	Chromosome	540565	541866	+	1302	60	76	39	56	66	67	236	140
b0514	Chromosome	541888	543033	+	1146	49	95	42	73	81	111	122	151
b0515	Chromosome	543261	544046	-	786	46	51	62	53	412	409	610	612
b0516	Chromosome	544057	545292	-	1236	77	88	60	52	253	226	390	380
b0517	Chromosome	545314	546363	-	1050	31	71	49	54	10	22	112	124
b0518	Chromosome	546680	548347	+	1668	76	103	58	89	184	193	144	158
b4572	Chromosome	548357	549616	+	1260	57	70	56	56	76	67	149	155
b0520	Chromosome	549627	550442	+	816	17	26	18	14	12	23	61	66
b0521	Chromosome	550439	551332	+	894	54	49	27	47	51	57	70	66
b0522	Chromosome	551527	552594	-	1068	68	54	45	48	117	117	142	186
b0523	Chromosome	552591	553100	-	510	32	35	35	39	5	7	22	23
b0524	Chromosome	553218	553940	-	723	32	69	33	47	123	131	237	239
b0525	Chromosome	553943	554437	-	495	303	280	279	288	2620	2437	3097	2923
b0526	Chromosome	554611	555996	+	1386	282	195	217	161	505	487	689	716
b0527	Chromosome	556032	556553	-	522	895	55	652	47	9	27	112	113
b0528	Chromosome	556661	556873	-	213	11	15	8	13	2	3	71	37
b0529	Chromosome	556875	557741	-	867	105	109	99	91	795	760	593	588
b0530	Chromosome	558212	558754	+	543	29	26	16	24	26	21	29	20
b0531	Chromosome	558974	559666	+	693	26	31	23	25	13	26	60	81
b0532	Chromosome	559697	562300	+	2604	165	209	140	126	215	128	396	249
b0533	Chromosome	562336	563319	+	984	39	55	26	41	26	40	42	54
b0534	Chromosome	563330	563845	+	516	12	19	12	14	11	9	13	11
b0535	Chromosome	563848	564480	-	633	43	39	24	23	55	76	99	141
b0536	Chromosome	564723	564799	+	77	13	17	7	9	89	68	43	28
b0537	Chromosome	564815	565978	-	1164	83	69	61	57	296	224	416	471
b4633	Chromosome	565858	566079	-	222	1	3	2	1	3	2	4	1
b0539	Chromosome	566098	566376	-	279	21	19	21	14	6	5	6	4
b4508	Chromosome	566376	566687	+	312	25	19	14	25	10	32	35	59
b0540	Chromosome	566842	567141	+	300	9	11	7	4	44	41	105	107
b0541	Chromosome	567138	568004	+	867	24	30	24	18	180	148	209	189
b0543	Chromosome	568315	568647	+	333	29	19	13	13	64	61	24	16
b0544	Chromosome	568902	570428	+	1527	124	151	139	134	109	65	203	109
b0545	Chromosome	570893	571444	+	552	39	45	14	31	16	13	30	39
b0546	Chromosome	571454	572251	+	798	67	66	29	56	235	235	119	112
b4588	Chromosome	572368	572469	+	102	6	12	0	5	18	8	1	4
b0547	Chromosome	572466	572921	+	456	50	645	17	428	33	32	49	49
b0548	Chromosome	572921	573091	+	171	3	4	5	4	0	3	4	1
b0549	Chromosome	573084	573374	+	291	14	11	10	17	40	31	42	60
b0550	Chromosome	573371	573733	+	363	16	13	11	10	9	5	8	14
b4509	Chromosome	573730	573870	+	141	6	10	2	5	1	4	0	5
b0551	Chromosome	573956	574339	+	384	15	15	11	20	11	10	14	15
b0552	Chromosome	574737	575753	-	1017	116	108	100	96	1217	1121	1556	1434
b0554	Chromosome	577398	577613	+	216	7	9	3	8	5	5	4	1
b0555	Chromosome	577613	578110	+	498	15	19	10	19	43	7	130	98
b0556	Chromosome	578107	578568	+	462	3	6	2	5	25	41	27	31
b4510	Chromosome	578327	578509	+	183	0	0	0	0	0	0	0	0
b0557	Chromosome	578600	578893	-	294	56	59	48	52	434	438	424	479
b0558	Chromosome	579184	579594	-	411	12	24	15	24	13	9	61	31
b0559	Chromosome	579880	580086	+	207	24	30	10	12	12	5	79	89
b4589	Chromosome	580251	580445	-	195	36	99	40	57	37	25	34	38
b0560	Chromosome	580834	581379	+	546	11	21	13	21	7	8	117	135
b4634	Chromosome	581354	581662	+	309	10	10	5	8	5	1	5	15
b0561	Chromosome	581660	582097	+	438	21	16	8	9	13	25	17	22
b0563	Chromosome	582953	583135	+	183	10	1	6	5	2	3	3	3
b0564	Chromosome	583681	584430	+	750	82	84	75	71	155	220	114	192
b0565	Chromosome	584680	585633	-	954	390	404	322	317	3273	3179	4435	4282
b4635	Chromosome	586057	586101	+	45	5	4	5	10	61	23	37	23
b0566	Chromosome	586147	586908	-	762	56	77	49	49	51	30	50	37
b0567	Chromosome	587091	587981	-	891	28	30	18	27	52	56	240	184
b0568	Chromosome	587982	590954	-	2973	121	121	95	113	405	377	772	720
b0569	Chromosome	590941	593178	-	2238	79	95	74	83	193	182	471	471
b0570	Chromosome	593328	594770	-	1443	85	71	58	58	33	51	168	217
b0571	Chromosome	594760	595443	-	684	41	42	37	46	11	18	241	212
b0572	Chromosome	595600	596973	+	1374	28	47	48	44	25	25	55	54
b0573	Chromosome	597131	597463	+	333	19	20	13	19	82	79	103	132
b0574	Chromosome	597479	598702	+	1224	96	136	78	84	197	196	207	211
b0575	Chromosome	598714	601857	+	3144	129	224	118	160	261	242	223	276
b0576	Chromosome	601959	603335	+	1377	66	53	89	66	182	158	243	206
b0577	Chromosome	603416	604663	-	1248	77	79	90	83	671	646	319	282
b0578	Chromosome	604771	605424	-	654	166	178	122	138	1204	1012	1743	1544
b0579	Chromosome	605518	605886	-	369	30	40	22	31	149	139	199	245
b0580	Chromosome	605951	606199	-	249	11	17	23	25	14	19	43	32
b0581	Chromosome	606265	607383	-	1119	82	85	94	104	276	247	526	526
b4700	Chromosome	607734	607792	+	59	4	4	1	3	31	35	62	60
b4415	Chromosome	607836	607988	+	153	6	9	0	4	5	4	1	4
b0582	Chromosome	608065	609177	+	1113	72	65	54	53	287	293	468	491
b0583	Chromosome	609459	610079	-	621	25	22	16	20	46	88	36	14
b0584	Chromosome	610254	612494	-	2241	155	117	91	106	209	148	316	288
b0585	Chromosome	612737	613939	+	1203	33	61	29	35	56	74	74	63
b4511	Chromosome	613942	614160	+	219	8	5	4	8	3	4	5	3
b0586	Chromosome	614157	618038	+	3882	206	186	151	122	195	193	507	476
b0587	Chromosome	618254	619387	+	1134	30	45	38	29	71	106	42	174
b0588	Chromosome	619384	620199	-	816	30	41	24	29	8	19	27	35
b0589	Chromosome	620196	621188	-	993	64	49	29	39	13	20	44	47
b0590	Chromosome	621185	622189	-	1005	79	81	52	52	115	103	173	173
b0591	Chromosome	622300	623550	+	1251	70	81	58	59	30	104	133	224
b0592	Chromosome	623554	624510	-	957	53	48	38	34	61	78	39	51
b0593	Chromosome	624885	626060	+	1176	64	60	42	24	28	21	61	32
b0594	Chromosome	626070	627680	+	1611	53	84	51	63	82	97	34	35
b0595	Chromosome	627694	628551	+	858	62	55	43	50	36	32	50	80
b0596	Chromosome	628551	629297	+	747	35	49	34	38	154	157	110	76
b0597	Chromosome	629300	629713	+	414	18	26	14	31	7	12	51	32
b0598	Chromosome	629894	631999	+	2106	382	391	316	332	2269	2167	2847	2753
b4512	Chromosome	632182	632379	+	198	11	17	5	7	93	70	64	88
b0599	Chromosome	632389	633477	-	1089	75	108	60	70	371	286	357	306
b0600	Chromosome	633586	634746	+	1161	82	207	68	172	187	186	184	168
b0601	Chromosome	634747	635376	-	630	25	27	27	18	63	94	18	16
b0602	Chromosome	635349	636569	-	1221	38	36	25	38	40	89	61	107
b0603	Chromosome	636716	637618	-	903	40	45	23	38	25	35	37	31
b0604	Chromosome	637827	638573	-	747	62	122	58	100	801	720	364	334
b0605	Chromosome	638945	639508	+	564	4429	4425	3544	3472	37395	34502	54962	53063
b0606	Chromosome	639753	641318	+	1566	406	447	391	399	2707	2659	4177	3989
b0607	Chromosome	641439	641867	-	429	364	370	217	225	3102	2960	3583	3542
b0608	Chromosome	642088	643326	+	1239	56	52	50	55	1015	53	1904	72
b0610	Chromosome	643557	643967	-	411	40	40	30	34	231	223	371	358
b0611	Chromosome	644197	645003	-	807	149	151	93	104	726	689	987	982
b0612	Chromosome	645117	646580	-	1464	71	74	45	44	41	63	67	79
b0613	Chromosome	646631	647509	-	879	33	49	40	37	5	21	12	30
b0614	Chromosome	647484	648035	-	552	17	23	12	18	7	13	10	15
b0615	Chromosome	648039	649571	-	1533	83	94	63	59	111	86	51	60
b0616	Chromosome	649582	650490	-	909	55	66	44	50	62	54	32	42
b0617	Chromosome	650487	650783	-	297	12	18	12	13	16	57	37	86
b0618	Chromosome	650798	651856	-	1059	48	52	31	32	86	27	105	54
b0619	Chromosome	652235	653893	+	1659	80	83	52	68	444	201	694	289
b0620	Chromosome	653862	654542	+	681	24	33	24	26	89	80	44	75
b0621	Chromosome	654583	655968	-	1386	665	684	449	440	4084	3891	6710	6507
b0622	Chromosome	656557	657117	+	561	47	55	28	26	23	54	70	90
b0623	Chromosome	657292	657501	+	210	613	633	492	495	5208	4721	6366	5933
b0624	Chromosome	657555	657938	-	384	34	36	14	25	143	177	171	246
b0627	Chromosome	658947	659150	+	204	94	106	87	92	505	509	1074	1033
b0628	Chromosome	659251	660216	-	966	268	274	221	233	1844	1739	2981	2990
b0629	Chromosome	660425	661378	-	954	46	57	38	52	15	41	166	217
b0630	Chromosome	661637	662278	-	642	45	60	43	56	350	626	285	816
b0631	Chromosome	662379	662642	-	264	122	130	74	87	205	150	215	201
b0632	Chromosome	662752	663963	-	1212	214	220	166	183	993	1056	1342	1673
b0633	Chromosome	664102	665190	-	1089	223	246	165	164	1077	1117	1765	1659
b0634	Chromosome	665201	666313	-	1113	122	132	74	107	574	554	787	835
b0635	Chromosome	666316	668217	-	1902	79	86	84	84	167	178	676	527
b0636	Chromosome	668248	668715	-	468	51	39	31	36	305	309	454	484
b0637	Chromosome	668719	669036	-	318	45	45	35	38	286	237	250	316
b0638	Chromosome	669296	669907	-	612	24	17	23	17	79	74	212	200
b0639	Chromosome	669931	670572	-	642	75	70	78	65	213	213	287	278
b0640	Chromosome	670574	671605	-	1032	98	112	50	64	543	423	751	681
b0641	Chromosome	671605	672186	-	582	92	103	72	68	680	675	621	528
b0642	Chromosome	672201	674783	-	2583	1066	1093	825	832	7013	6572	10783	10438
b0643	Chromosome	675018	675500	+	483	229	233	151	170	1388	1377	2147	2180
b0644	Chromosome	675570	676547	-	978	43	57	34	38	111	139	118	96
b0645	Chromosome	676711	677418	+	708	28	18	26	19	98	207	219	350
b0646	Chromosome	677415	678842	+	1428	98	97	79	61	84	137	103	161
b0647	Chromosome	678852	679406	-	555	31	33	18	16	15	8	22	30
b0648	Chromosome	679508	680215	+	708	21	24	19	22	10	37	22	36
b0649	Chromosome	680212	681663	+	1452	93	90	61	53	116	107	215	150
b0650	Chromosome	681723	683393	-	1671	61	69	54	62	76	136	386	560
b0651	Chromosome	683477	684412	-	936	254	288	240	257	2372	2292	3221	3213
b0652	Chromosome	684530	685255	-	726	40	56	35	36	142	132	185	172
b0653	Chromosome	685255	685929	-	675	39	46	35	28	14	33	152	136
b0654	Chromosome	685929	686669	-	741	79	43	52	34	130	95	115	124
b0655	Chromosome	686839	687747	-	909	80	104	70	74	492	445	770	760
b0656	Chromosome	687997	689013	-	1017	134	128	92	99	1199	1088	1593	1405
b0657	Chromosome	689343	690881	-	1539	177	180	133	113	815	761	1485	1335
b0658	Chromosome	690906	691784	-	879	381	357	299	309	2687	2412	3772	3640
b0659	Chromosome	691874	692341	-	468	79	80	63	58	581	592	665	772
b0660	Chromosome	692338	693378	-	1041	237	237	190	195	1341	1316	1735	1706
b0661	Chromosome	693531	694955	-	1425	217	202	196	163	644	787	934	1090
b0662	Chromosome	695101	696276	+	1176	342	347	265	276	1515	1407	2446	2371
b0664	Chromosome	696430	696504	-	75	57	82	51	55	484	272	482	310
b0665	Chromosome	696542	696616	-	75	73	94	48	58	507	201	410	246
b0666	Chromosome	696664	696740	-	77	59	69	47	75	336	154	503	362
b0668	Chromosome	696756	696830	-	75	72	89	54	88	447	194	747	557
b0670	Chromosome	696865	696939	-	75	82	105	71	67	397	185	493	360
b0672	Chromosome	696963	697047	-	85	62	49	34	49	146	70	253	110
b0673	Chromosome	697057	697133	-	77	54	68	48	62	362	205	465	296
b0674	Chromosome	697513	699177	-	1665	176	190	131	173	928	906	1250	1218
b0675	Chromosome	699574	700326	-	753	117	123	106	119	1036	1155	1401	1667
b0676	Chromosome	700374	701594	-	1221	269	290	249	188	1547	1537	2036	2130
b0677	Chromosome	701603	702751	-	1149	352	346	244	257	2155	1931	2458	2331
b0678	Chromosome	702811	703611	-	801	436	329	296	214	2798	2669	3158	3225
b0679	Chromosome	703944	705890	+	1947	1207	1272	861	889	7610	7351	10249	10055
b0680	Chromosome	706093	707757	+	1665	446	498	401	424	3258	3165	2941	2851
b0681	Chromosome	708334	709740	+	1407	137	136	108	115	588	656	604	620
b0682	Chromosome	709790	710116	+	327	13	20	4	10	57	21	11	11
b0683	Chromosome	710200	710646	-	447	116	121	89	96	1028	864	1221	1053
b4637	Chromosome	710639	710725	-	87	38	38	47	60	166	219	882	832
b0684	Chromosome	710935	711465	-	531	112	109	111	109	1205	1193	980	991
b0685	Chromosome	711605	711898	-	294	14	17	19	26	103	62	7	8
b0686	Chromosome	712038	712802	-	765	64	53	40	46	539	495	425	415
b0687	Chromosome	712987	713532	+	546	169	172	130	128	712	670	874	1033
b0688	Chromosome	713558	715198	+	1641	803	770	573	578	3998	3657	6833	6617
b0689	Chromosome	715412	715906	+	495	29	33	26	25	96	23	154	39
b0691	Chromosome	715947	716597	-	651	68	55	54	33	34	39	50	83
b4636	Chromosome	716721	716870	-	150	8	5	3	2	2	6	8	2
b0692	Chromosome	716946	718265	-	1320	57	80	33	46	84	92	123	140
b0693	Chromosome	718262	720460	-	2199	89	128	44	86	177	199	167	271
b4590	Chromosome	720583	720840	+	258	15	15	8	7	6	19	5	10
b0694	Chromosome	721056	721733	-	678	50	36	44	39	66	77	27	32
b0695	Chromosome	721730	724414	-	2685	457	296	366	236	763	832	875	1007
b0696	Chromosome	724407	724979	-	573	30	33	27	36	105	122	306	311
b0697	Chromosome	724988	727036	-	2049	113	131	81	105	377	413	358	367
b0698	Chromosome	727059	728732	-	1674	88	108	62	74	336	337	115	151
b4513	Chromosome	728732	728821	-	90	9	37	13	26	40	42	34	32
b0699	Chromosome	729134	729340	+	207	105	110	49	45	378	353	670	680
b0700	Chromosome	729583	733776	+	4194	158	174	107	116	361	388	566	645
b0702	Chromosome	733776	734102	+	327	24	21	18	17	22	18	46	35
b0703	Chromosome	734133	735653	+	1521	62	61	41	50	42	61	87	96
b0704	Chromosome	735650	736219	+	570	544	92	396	66	1271	123	2313	190
b4514	Chromosome	736445	736684	+	240	5	6	4	7	1	4	7	4
b0705	Chromosome	736825	737961	+	1137	32	38	24	27	13	14	21	23
b0706	Chromosome	738092	738853	+	762	22	17	9	15	10	10	16	14
b0707	Chromosome	739001	739510	+	510	48	56	36	37	414	397	469	514
b0708	Chromosome	739507	740925	+	1419	88	91	70	81	410	414	537	499
b0709	Chromosome	741075	742556	-	1482	86	89	63	75	160	144	177	190
b0710	Chromosome	742827	743570	+	744	332	332	275	278	1468	1311	3087	2975
b0711	Chromosome	743593	744249	+	657	160	168	124	124	859	865	1242	1300
b0712	Chromosome	744243	745175	+	933	222	251	152	174	840	815	1927	1783
b0713	Chromosome	745165	745899	+	735	102	102	54	51	217	236	484	545
b0714	Chromosome	745935	746726	+	792	49	62	56	53	305	321	256	267
b0715	Chromosome	746723	747769	-	1047	288	204	260	178	555	654	427	563
b0716	Chromosome	747921	748982	-	1062	22	26	24	21	23	30	31	25
b0717	Chromosome	748979	749707	-	729	35	38	22	37	101	90	24	52
b0718	Chromosome	749722	752169	-	2448	99	115	79	73	78	661	118	1151
b0719	Chromosome	752229	752795	-	567	23	23	19	18	50	48	13	23
b0720	Chromosome	753185	754468	-	1284	2589	2541	2023	2026	20909	19850	32642	31241
b0721	Chromosome	755177	755566	+	390	79	80	56	63	600	546	1161	1333
b0722	Chromosome	755560	755907	+	348	100	84	74	65	254	244	468	383
b0723	Chromosome	755907	757673	+	1767	657	669	540	511	6205	5949	5014	4921
b0724	Chromosome	757689	758405	+	717	290	295	186	190	2067	1990	2004	1909
b0726	Chromosome	758706	761507	+	2802	966	1024	828	821	6810	6663	8964	8812
b0727	Chromosome	761522	762739	+	1218	895	940	672	675	6192	5911	9381	8989
b0728	Chromosome	763014	764180	+	1167	719	704	493	517	4535	5195	6846	7535
b0729	Chromosome	764180	765049	+	870	359	392	307	309	2914	2591	3616	3368
b0730	Chromosome	765153	765875	-	723	47	47	30	42	353	385	213	275
b0731	Chromosome	765984	767960	+	1977	96	72	69	72	70	69	158	149
b0732	Chromosome	767978	770611	+	2634	122	141	67	94	98	147	202	275
b0733	Chromosome	771458	773026	+	1569	10419	10488	7897	8118	84216	73037	118184	105537
b0734	Chromosome	773042	774181	+	1140	7798	7676	6093	6187	61444	59286	85307	84038
b4515	Chromosome	774196	774309	+	114	328	331	251	278	3968	2460	5084	3317
b0735	Chromosome	774309	774602	+	294	263	286	192	197	3248	2283	2867	2009
b0736	Chromosome	774752	775156	+	405	29	36	27	29	42	54	74	110
b0737	Chromosome	775153	775845	+	693	69	70	56	44	134	199	278	362
b0738	Chromosome	775849	776277	+	429	103	88	71	62	155	159	184	134
b0739	Chromosome	776342	777607	+	1266	231	208	171	135	663	663	784	779
b0740	Chromosome	777740	779032	+	1293	545	587	504	531	4318	4554	5380	5947
b0741	Chromosome	779067	779588	+	522	885	892	661	685	8248	7550	10218	9338
b0742	Chromosome	779598	780389	+	792	185	194	169	169	1764	2282	2795	3950
b0743	Chromosome	780554	780629	+	76	114	113	79	106	292	152	329	214
b0744	Chromosome	780765	780840	+	76	319	395	268	347	1458	621	2036	957
b0745	Chromosome	780843	780918	+	76	107	109	54	90	314	126	297	207
b0746	Chromosome	781068	781143	+	76	313	428	296	334	1468	622	2028	996
b0747	Chromosome	781147	781222	+	76	116	122	70	95	304	146	285	188
b0748	Chromosome	781369	781444	+	76	118	113	81	89	285	139	340	250
b0749	Chromosome	781577	781652	+	76	82	117	73	106	283	130	308	211
b0750	Chromosome	782085	783128	+	1044	48	58	43	36	198	211	301	339
b0751	Chromosome	783166	783885	+	720	74	77	67	69	357	320	608	596
b0752	Chromosome	783882	784823	-	942	95	100	97	103	224	221	538	493
b0753	Chromosome	784937	785317	-	381	21	21	18	13	31	58	129	83
b0754	Chromosome	785633	786685	+	1053	217	268	165	184	1537	1501	2428	2391
b0755	Chromosome	786843	787595	-	753	913	902	769	751	7010	6653	11677	11276
b0756	Chromosome	787797	788837	-	1041	425	432	322	317	4309	3850	4293	3962
b0757	Chromosome	788831	789979	-	1149	765	782	566	526	4655	4783	7903	8083
b0758	Chromosome	789983	791029	-	1047	314	321	206	219	2640	2683	3360	3198
b0759	Chromosome	791039	792055	-	1017	481	488	371	368	4236	3983	4001	3991
b0760	Chromosome	792316	793788	-	1473	78	82	63	89	159	146	338	322
b0761	Chromosome	793856	794644	-	789	49	75	38	48	285	283	481	491
b0762	Chromosome	794773	794922	+	150	13	15	14	11	74	63	5	6
b0763	Chromosome	795089	795862	+	774	67	80	53	48	496	451	956	951
b0764	Chromosome	795862	796551	+	690	54	82	43	44	235	225	269	257
b0765	Chromosome	796554	797612	+	1059	88	81	45	63	273	280	373	354
b0766	Chromosome	797613	798431	-	819	92	106	66	84	348	381	537	593
b0767	Chromosome	798586	799581	+	996	539	524	370	370	3318	3192	5284	5043
b0768	Chromosome	799622	800575	-	954	50	49	43	45	132	145	140	81
b0769	Chromosome	800759	801811	+	1053	26	41	27	35	25	12	40	85
b0770	Chromosome	801887	803320	+	1434	62	92	37	73	36	54	163	139
b0771	Chromosome	803503	805764	+	2262	85	90	59	68	207	212	138	144
b0772	Chromosome	805998	807281	-	1284	159	194	97	144	831	816	1423	1453
b0773	Chromosome	807433	807909	-	477	115	131	39	44	488	498	873	832
b0774	Chromosome	807968	809257	-	1290	47	63	38	45	28	52	126	197
b0775	Chromosome	809344	810384	+	1041	44	44	33	42	199	137	272	259
b0776	Chromosome	810381	811535	+	1155	53	242	33	171	98	242	132	361
b0777	Chromosome	811522	812277	+	756	45	42	25	34	67	74	159	154
b0778	Chromosome	812270	812947	+	678	22	46	22	27	12	14	61	70
b0779	Chromosome	813526	815547	+	2022	226	234	194	190	1299	1296	2478	2462
b0780	Chromosome	815739	816647	-	909	63	73	51	47	252	267	578	555
b0781	Chromosome	817044	818033	+	990	128	148	123	105	803	772	1138	1148
b0782	Chromosome	818055	818567	+	513	162	163	149	150	822	775	1876	1796
b0783	Chromosome	818570	819055	+	486	105	107	68	59	861	857	973	904
b0784	Chromosome	819048	819293	+	246	81	71	41	47	168	339	191	298
b0785	Chromosome	819295	819747	+	453	96	126	78	78	924	710	863	802
b0786	Chromosome	819884	820588	+	705	217	221	176	190	1478	1428	1608	1623
b0787	Chromosome	820793	821506	+	714	33	26	14	22	9	11	81	56
b0788	Chromosome	821542	822498	-	957	54	66	34	41	140	116	36	23
b0789	Chromosome	822498	823739	-	1242	49	47	46	50	132	142	272	315
b0790	Chromosome	823736	824497	-	762	56	55	39	39	231	214	111	142
b0791	Chromosome	824630	825040	+	411	114	141	116	164	284	301	773	707
b0792	Chromosome	825002	826108	-	1107	90	98	66	59	140	176	353	378
b0793	Chromosome	826119	827252	-	1134	177	929	139	641	288	330	656	634
b0794	Chromosome	827245	828981	-	1737	207	191	145	168	1147	1016	1472	1395
b0795	Chromosome	828974	829972	-	999	176	196	160	140	935	860	1329	1252
b0796	Chromosome	829972	830643	-	672	43	62	42	46	456	438	461	537
b0797	Chromosome	830872	832236	+	1365	138	132	102	117	643	602	667	641
b0798	Chromosome	832468	832950	-	483	36	39	32	34	314	327	552	532
b0799	Chromosome	833070	835220	+	2151	199	212	140	152	303	348	852	922
b0800	Chromosome	835248	836210	+	963	162	175	187	185	1402	1336	1834	1759
b0801	Chromosome	836351	837436	+	1086	122	116	107	114	688	609	1178	1052
b0802	Chromosome	837665	837925	-	261	14	15	16	21	46	26	137	130
b0803	Chromosome	838190	838456	-	267	11	15	12	17	5	5	4	4
b0804	Chromosome	838530	839207	-	678	34	44	23	16	90	103	251	261
b0805	Chromosome	839249	841531	-	2283	314	247	242	198	370	664	517	757
b0806	Chromosome	841796	842056	-	261	45	52	32	29	131	133	419	430
b0807	Chromosome	842332	843258	+	927	95	280	60	200	284	280	108	119
b0808	Chromosome	843255	845480	-	2226	153	155	102	97	271	473	691	1085
b0809	Chromosome	845741	846463	-	723	70	81	93	81	581	590	430	385
b0810	Chromosome	846460	847119	-	660	64	58	68	58	610	551	946	1010
b0811	Chromosome	847258	848004	-	747	309	359	214	217	2455	2260	3117	2853
b0812	Chromosome	848408	848911	-	504	1773	1838	1514	1510	15932	15012	22856	22118
b0813	Chromosome	849210	850097	-	888	56	52	30	52	144	290	212	454
b0814	Chromosome	850450	850965	+	516	789	784	482	475	5516	5018	7802	7239
b0815	Chromosome	851014	852597	-	1584	154	210	113	164	223	169	309	344
b4705	Chromosome	852869	852997	-	129	9	19	7	6	104	69	242	246
b0817	Chromosome	853183	853650	+	468	53	47	37	38	401	270	439	181
b0818	Chromosome	853647	854765	+	1119	224	90	145	82	158	170	460	457
b0819	Chromosome	854824	855744	-	921	110	139	88	101	418	576	300	480
b0820	Chromosome	855963	857555	+	1593	195	201	146	169	1175	1109	1251	1315
b0821	Chromosome	857796	859061	-	1266	59	63	45	45	37	57	149	177
b0822	Chromosome	859213	860028	-	816	33	37	41	44	184	187	257	252
b0823	Chromosome	860174	862606	-	2433	170	265	109	209	639	932	532	1108
b0824	Chromosome	862612	863511	-	900	36	36	18	31	112	100	163	124
b0825	Chromosome	863642	864304	+	663	33	30	31	34	112	104	405	388
b0826	Chromosome	864380	865129	-	750	114	112	83	87	801	758	711	639
b0827	Chromosome	865129	866364	-	1236	281	253	223	204	1694	1725	1716	1803
b0828	Chromosome	866568	867533	+	966	184	201	88	105	911	867	1458	1472
b0829	Chromosome	867520	869391	+	1872	268	308	198	232	894	898	2082	2091
b0830	Chromosome	869411	870949	+	1539	251	238	187	179	1232	1225	2507	2479
b0831	Chromosome	870967	871887	+	921	91	103	66	57	201	221	620	627
b0832	Chromosome	871890	872801	+	912	49	57	35	53	119	108	254	251
b0833	Chromosome	872979	875327	+	2349	113	127	78	88	238	215	683	507
b0834	Chromosome	875335	876663	+	1329	53	65	27	38	40	69	116	114
b0835	Chromosome	876710	878035	-	1326	147	129	72	79	210	220	415	436
b0836	Chromosome	878248	878631	+	384	300	318	231	246	3071	3016	3163	3079
b0837	Chromosome	878742	879857	+	1116	111	68	59	62	498	559	155	227
b0838	Chromosome	879854	880480	-	627	175	176	151	154	1092	979	1231	1207
b0839	Chromosome	880727	881929	+	1203	214	231	204	200	1321	1289	2127	2145
b0840	Chromosome	881976	882734	-	759	55	51	50	51	243	290	237	233
b0841	Chromosome	882792	883388	-	597	67	82	38	58	977	241	1712	365
b0842	Chromosome	883673	884905	+	1233	92	115	47	67	79	147	183	196
b0843	Chromosome	884946	885230	-	285	22	26	11	12	76	26	71	35
b0844	Chromosome	885316	886131	-	816	80	83	74	64	336	339	454	477
b0845	Chromosome	886131	887339	-	1209	46	78	42	51	161	199	258	371
b0846	Chromosome	887423	887959	+	537	23	36	13	11	144	146	28	50
b4417	Chromosome	887976	888054	-	79	3	5	3	11	5	4	132	117
b0847	Chromosome	888134	889819	-	1686	95	100	98	108	466	515	1104	1146
b0848	Chromosome	890089	890466	+	378	26	25	27	31	139	136	256	278
b0849	Chromosome	890496	890753	-	258	12	18	5	8	83	75	7	21
b0850	Chromosome	890913	891200	+	288	20	19	18	25	63	88	411	426
b0851	Chromosome	891184	891906	+	723	133	119	83	68	717	657	486	518
b0852	Chromosome	891967	892869	+	903	92	64	52	43	477	454	554	560
b0853	Chromosome	892957	893433	+	477	82	76	66	65	477	494	543	583
b0854	Chromosome	893784	894896	+	1113	158	157	129	123	696	644	1146	1079
b0855	Chromosome	894991	896124	+	1134	42	42	28	37	78	47	72	87
b0856	Chromosome	896134	897087	+	954	50	59	27	39	84	56	218	115
b0857	Chromosome	897084	897929	+	846	42	67	28	35	20	30	21	36
b0858	Chromosome	897989	898477	+	489	26	43	25	22	9	12	39	37
b0859	Chromosome	898518	899645	+	1128	45	60	42	45	62	67	42	100
b0860	Chromosome	899844	900575	-	732	43	46	48	50	164	207	170	243
b0861	Chromosome	900866	901534	-	669	472	636	361	474	1069	1256	859	1689
b0862	Chromosome	901534	902250	-	717	134	276	152	260	1096	968	1047	956
b0863	Chromosome	902257	902988	-	732	446	435	458	436	3465	3444	5332	5251
b0864	Chromosome	903006	903734	-	729	153	161	114	95	808	914	1103	1107
b0865	Chromosome	903952	904467	-	516	194	183	167	178	1803	1720	2392	2312
b0866	Chromosome	904593	904916	+	324	139	134	106	109	256	269	1162	1285
b0867	Chromosome	904913	905743	+	831	133	160	125	131	527	444	1068	887
b0868	Chromosome	905740	906753	-	1014	72	75	53	47	237	240	706	687
b0869	Chromosome	906852	908282	-	1431	124	147	126	131	718	763	605	539
b0870	Chromosome	908293	909294	-	1002	172	180	136	148	907	901	1966	1998
b0871	Chromosome	909331	911049	-	1719	356	369	201	236	2123	2041	3101	3069
b0872	Chromosome	911182	912150	-	969	271	259	247	206	388	691	577	1064
b0873	Chromosome	912162	913814	-	1653	426	234	366	191	1399	1370	1872	1801
b0874	Chromosome	913958	914857	-	900	39	78	25	73	1112	164	2020	262
b0875	Chromosome	915352	916047	-	696	27	55	31	37	31	15	37	31
b0876	Chromosome	916473	918131	+	1659	217	196	166	154	1148	1131	1172	1231
b0877	Chromosome	918128	919120	-	993	171	212	186	230	1503	1441	2048	1956
b0878	Chromosome	919235	920350	+	1116	76	69	60	63	443	346	329	343
b0879	Chromosome	920347	922293	+	1947	116	127	84	104	442	428	542	503
b0880	Chromosome	922366	922590	-	225	186	172	110	109	1626	1657	1802	1807
b0881	Chromosome	922913	923233	+	321	119	155	88	115	954	1014	1004	1134
b0882	Chromosome	923264	925540	+	2277	1361	1332	993	1022	9511	8891	12934	12390
b0883	Chromosome	925884	925971	-	88	122	166	86	128	757	384	627	405
b0884	Chromosome	926225	926443	-	219	124	112	78	96	534	442	1117	1029
b0885	Chromosome	926728	927432	-	705	44	39	46	44	46	40	264	323
b0886	Chromosome	927474	929195	-	1722	112	134	114	136	706	796	848	922
b0887	Chromosome	929196	930962	-	1767	140	124	92	99	557	515	749	723
b0888	Chromosome	931085	932050	-	966	213	198	152	157	1096	1066	2231	2178
b0889	Chromosome	932595	933089	+	495	177	208	142	145	2065	1657	2291	2060
b0890	Chromosome	933224	937213	+	3990	1329	1243	862	817	2916	2870	4216	4122
b0891	Chromosome	937372	937983	+	612	120	139	107	121	940	998	1159	1357
b0892	Chromosome	937994	939337	+	1344	109	128	83	85	358	236	713	529
b0893	Chromosome	939428	940720	+	1293	1857	1869	1351	1369	14989	14268	20028	19316
b0894	Chromosome	940959	943403	+	2445	2910	2803	2066	2065	20388	18858	29711	27713
b0895	Chromosome	943414	944031	+	618	666	711	577	580	6152	5939	7421	7168
b0896	Chromosome	944033	944896	+	864	916	949	752	776	6008	5257	11302	10727
b0897	Chromosome	944931	945557	-	627	280	300	191	219	1935	1870	2638	2511
b0898	Chromosome	945871	947019	+	1149	54	62	42	41	185	157	144	139
b0899	Chromosome	947229	948659	+	1431	65	81	44	54	141	142	105	97
b0900	Chromosome	948660	949568	-	909	28	42	19	19	95	70	79	62
b0901	Chromosome	949668	950258	+	591	21	31	25	18	88	100	151	186
b0902	Chromosome	950340	951080	-	741	141	149	135	142	957	893	1194	1195
b0903	Chromosome	951272	953554	-	2283	43875	43766	35771	35675	390294	375338	562963	548436
b0904	Chromosome	953609	954466	-	858	1138	1148	880	918	7073	7354	10069	10823
b0905	Chromosome	954872	956632	-	1761	146	152	107	125	792	769	588	617
b0906	Chromosome	956762	957454	+	693	123	191	61	114	564	590	361	384
b0907	Chromosome	957653	958741	+	1089	820	931	728	816	2069	1821	3940	3425
b0908	Chromosome	958812	960095	+	1284	127	125	80	78	488	479	961	954
b0909	Chromosome	960264	961028	+	765	26	53	21	47	13	26	30	24
b0910	Chromosome	961201	961884	+	684	103	103	103	110	692	909	669	835
b0911	Chromosome	961995	963668	+	1674	5097	5029	4114	4150	38175	36177	59275	57233
b0912	Chromosome	963828	964112	+	285	214	217	136	131	2277	2146	2811	2647
b0913	Chromosome	964320	966584	+	2265	129	141	84	84	229	91	533	335
b0914	Chromosome	966621	968369	+	1749	232	219	185	201	1418	1331	1503	1523
b0915	Chromosome	968366	969352	+	987	98	80	37	50	365	295	131	94
b0916	Chromosome	969389	970621	+	1233	59	51	35	37	173	177	80	43
b0917	Chromosome	970673	970855	+	183	50	45	49	45	340	380	525	591
b0918	Chromosome	970852	971598	+	747	249	181	210	147	1222	1217	1705	1599
b0919	Chromosome	971752	972645	+	894	429	435	358	362	3444	3308	4259	4166
b0920	Chromosome	972622	973401	-	780	69	75	61	74	307	303	153	124
b0921	Chromosome	973537	974322	+	786	74	81	65	59	457	499	438	418
b0922	Chromosome	974319	975641	+	1323	120	131	93	86	904	787	916	901
b0923	Chromosome	975622	976326	+	705	141	133	105	110	538	558	866	822
b0924	Chromosome	976326	980786	+	4461	1173	1051	1012	928	5967	5755	9260	9281
b0925	Chromosome	981047	982894	+	1848	241	239	148	166	1262	1208	2188	2087
b0926	Chromosome	983075	983623	+	549	179	174	111	132	1614	1554	1994	1959
b0927	Chromosome	983650	984297	+	648	128	136	104	109	1291	1231	1129	1058
b0928	Chromosome	984519	985709	-	1191	1450	1435	1120	1115	11807	11316	16539	16220
b0929	Chromosome	985894	986982	-	1089	7541	7585	6060	6076	70712	67741	100451	98160
b0930	Chromosome	987585	988985	-	1401	501	690	364	551	2401	2238	3631	3547
b0931	Chromosome	989154	990356	-	1203	119	137	83	92	624	632	950	979
b0932	Chromosome	990622	993234	+	2613	1191	1222	973	969	9365	8972	11633	11419
b0933	Chromosome	993277	994044	-	768	54	52	23	26	51	28	246	183
b0934	Chromosome	994041	994832	-	792	26	31	27	35	63	46	171	219
b0935	Chromosome	994843	995988	-	1146	42	66	34	43	20	33	123	130
b0936	Chromosome	995985	996944	-	960	34	30	14	18	85	98	134	127
b0937	Chromosome	996937	997512	-	576	16	15	22	17	58	47	19	24
b0938	Chromosome	997868	998407	+	540	31	21	36	31	23	22	95	138
b0939	Chromosome	998490	999191	+	702	38	77	50	56	30	26	98	83
b0940	Chromosome	999216	1001816	+	2601	90	132	66	90	340	147	524	201
b0941	Chromosome	1001807	1002877	+	1071	49	119	28	91	84	76	69	39
b0942	Chromosome	1002889	1003431	+	543	19	29	17	23	51	37	32	33
b0943	Chromosome	1003439	1003954	+	516	12	13	7	17	49	61	55	50
b0944	Chromosome	1003947	1004657	+	711	20	41	14	13	137	133	133	131
b0945	Chromosome	1004768	1005778	+	1011	49	65	34	35	332	261	804	709
b0946	Chromosome	1005952	1006494	+	543	47	55	51	47	426	433	497	578
b0947	Chromosome	1006491	1007600	-	1110	72	89	56	63	689	633	528	507
b0948	Chromosome	1007844	1009952	+	2109	215	226	125	122	948	938	1236	1244
b0949	Chromosome	1009964	1011871	+	1908	393	351	250	256	1877	1882	1909	1851
b0950	Chromosome	1012001	1013254	+	1254	56	77	56	65	264	231	428	401
b0951	Chromosome	1013259	1014899	+	1641	113	132	81	83	601	1015	862	1699
b0952	Chromosome	1014896	1015459	+	564	53	44	42	45	251	292	370	384
b0953	Chromosome	1015715	1015882	+	168	653	674	513	524	5106	4876	7245	7115
b0954	Chromosome	1015952	1016470	-	519	308	304	204	192	1973	1769	2348	2312
b0955	Chromosome	1016539	1018299	-	1761	230	246	147	167	1304	1457	1655	1620
b0956	Chromosome	1018485	1018937	+	453	75	98	61	58	566	607	321	379
b0957	Chromosome	1019013	1020053	-	1041	17176	17771	13815	13950	148876	118672	210785	176231
b0958	Chromosome	1020410	1020919	-	510	65	62	32	37	358	369	444	445
b0959	Chromosome	1021138	1021767	+	630	61	77	35	57	458	391	382	367
b0960	Chromosome	1021730	1023883	-	2154	148	142	91	112	422	399	619	632
b0961	Chromosome	1023902	1024348	-	447	60	49	47	38	248	630	313	1017
b0962	Chromosome	1024471	1026525	+	2055	209	247	154	174	856	893	1082	914
b0963	Chromosome	1026557	1027015	-	459	169	162	138	127	1383	1292	1742	1628
b0964	Chromosome	1027111	1027773	-	663	36	30	18	26	95	99	19	28
b0965	Chromosome	1027946	1028359	+	414	58	49	39	43	496	442	583	591
b0966	Chromosome	1028404	1028721	-	318	32	33	14	25	101	93	594	534
b0967	Chromosome	1028779	1029969	-	1191	95	85	76	79	507	528	843	879
b0968	Chromosome	1030064	1030342	+	279	23	24	27	20	160	85	82	79
b0969	Chromosome	1030339	1030668	-	330	58	66	48	51	123	185	740	650
b0970	Chromosome	1030759	1031418	-	660	889	875	683	712	5129	4884	5791	5571
b0971	Chromosome	1031625	1031712	-	88	68	99	62	62	384	199	487	257
b0972	Chromosome	1032139	1033257	+	1119	80	90	52	71	71	72	232	184
b0973	Chromosome	1033254	1035047	+	1794	87	100	42	70	301	307	247	229
b0974	Chromosome	1035066	1035773	+	708	35	25	23	27	7	15	56	65
b0975	Chromosome	1035770	1036357	+	588	33	28	34	24	10	7	33	54
b0976	Chromosome	1036354	1036752	+	399	22	28	8	9	12	16	20	29
b0977	Chromosome	1036749	1037606	+	858	38	58	29	35	7	19	33	23
b0978	Chromosome	1037740	1039284	+	1545	327	111	262	99	1216	234	2231	430
b0979	Chromosome	1039296	1040432	+	1137	63	56	49	38	136	120	360	365
b4592	Chromosome	1040445	1040537	+	93	29	26	15	10	5	18	30	46
b0980	Chromosome	1040617	1041915	+	1299	54	80	66	58	444	361	254	158
b0981	Chromosome	1042030	1044210	-	2181	110	142	73	80	323	810	351	1374
b0982	Chromosome	1044230	1044676	-	447	10	9	9	5	10	42	9	14
b0983	Chromosome	1044664	1045803	-	1140	80	102	67	56	53	49	224	251
b0984	Chromosome	1045849	1047945	-	2097	93	105	75	73	165	100	221	73
b0985	Chromosome	1047945	1048691	-	747	19	30	17	14	24	17	17	18
b0986	Chromosome	1048688	1049332	-	645	14	28	17	12	64	128	80	217
b0987	Chromosome	1049439	1049744	-	306	27	22	19	22	41	43	14	22
b4516	Chromosome	1049833	1050108	+	276	3	4	1	7	10	21	0	0
b0988	Chromosome	1050027	1050530	+	504	16	10	4	10	35	44	16	15
b0989	Chromosome	1050963	1051175	-	213	12	17	2	7	5	19	50	51
b0990	Chromosome	1051461	1051673	+	213	16	14	16	10	68	30	78	18
b0991	Chromosome	1051847	1052077	+	231	14	15	4	4	2	3	14	9
b4517	Chromosome	1052067	1052240	+	174	44	40	20	20	107	128	229	232
b0992	Chromosome	1052289	1053362	-	1074	82	90	79	93	668	679	458	468
b0993	Chromosome	1053434	1056178	-	2745	331	202	257	178	355	378	303	331
b0994	Chromosome	1056261	1057289	+	1029	47	58	38	35	191	168	91	119
b0995	Chromosome	1057262	1057954	-	693	36	35	41	36	142	124	112	112
b0996	Chromosome	1058084	1059256	+	1173	209	1159	147	806	31	35	47	51
b0997	Chromosome	1059256	1061802	+	2547	110	138	61	82	146	167	200	236
b0998	Chromosome	1061799	1062398	+	600	23	28	9	22	54	29	78	77
b0999	Chromosome	1062550	1062855	-	306	54	55	38	42	290	301	329	251
b1000	Chromosome	1062855	1063775	-	921	307	298	147	149	1274	2571	1684	4349
b1001	Chromosome	1064036	1065292	+	1257	66	73	60	58	363	88	648	159
b1002	Chromosome	1065585	1066826	+	1242	998	1054	838	889	10150	9650	13000	12357
b1003	Chromosome	1066864	1067091	-	228	220	241	130	162	1668	1201	1901	1461
b1004	Chromosome	1067112	1067708	-	597	2074	2027	1717	1731	16333	15865	22228	22168
b4518	Chromosome	1068081	1068254	+	174	18	16	13	14	41	44	51	42
b1006	Chromosome	1068511	1069839	-	1329	129	123	80	104	132	122	246	240
b1007	Chromosome	1069860	1070354	-	495	20	20	10	17	45	22	98	130
b1008	Chromosome	1070365	1070955	-	591	29	26	21	18	37	8	69	23
b1009	Chromosome	1070965	1071765	-	801	30	39	20	22	29	55	17	30
b1010	Chromosome	1071773	1072159	-	387	13	25	10	18	87	51	22	38
b1011	Chromosome	1072171	1072863	-	693	28	50	27	39	4	41	74	104
b1012	Chromosome	1072863	1074011	-	1149	58	63	30	53	17	37	48	45
b1013	Chromosome	1074242	1074880	+	639	27	24	20	24	298	272	133	111
b1014	Chromosome	1074920	1078882	-	3963	249	285	211	234	1304	1312	1483	1500
b1015	Chromosome	1079305	1080813	+	1509	96	115	65	88	266	348	597	671
b1018	Chromosome	1082243	1083370	+	1128	41	59	37	23	27	77	148	226
b1019	Chromosome	1083376	1084647	+	1272	39	47	36	27	34	56	87	119
b1020	Chromosome	1084992	1086056	+	1065	44	62	34	44	21	25	63	140
b1021	Chromosome	1086106	1086519	-	414	20	21	16	18	36	16	48	15
b1022	Chromosome	1086521	1087846	-	1326	45	48	33	43	160	124	107	53
b1023	Chromosome	1087839	1089857	-	2019	103	100	40	48	41	32	224	181
b1024	Chromosome	1089866	1092289	-	2424	121	122	73	90	225	221	810	697
b1025	Chromosome	1092876	1094234	+	1359	123	192	101	131	193	130	397	226
b1026	Chromosome	1094275	1095141	-	867	34	33	25	23	176	163	203	195
b1027	Chromosome	1095138	1095437	-	300	8	16	12	12	33	25	102	61
b1028	Chromosome	1095505	1095846	+	342	24	19	19	13	58	108	109	114
b1029	Chromosome	1095843	1096829	+	987	53	59	37	46	80	100	120	113
b1032	Chromosome	1097565	1097652	-	88	112	165	92	133	677	405	637	427
b1033	Chromosome	1097886	1098824	+	939	178	176	134	138	930	883	1595	1581
b1034	Chromosome	1098879	1099616	+	738	146	160	135	137	886	928	1719	1820
b1035	Chromosome	1099640	1100194	+	555	98	105	77	89	353	262	1437	1290
b1036	Chromosome	1100296	1100787	+	492	28	27	34	35	341	279	197	186
b1037	Chromosome	1100851	1101684	-	834	33	21	25	27	34	28	118	70
b1038	Chromosome	1101711	1102127	-	417	17	16	6	22	10	16	8	8
b1039	Chromosome	1102152	1102541	-	390	17	24	7	14	8	8	10	11
b1040	Chromosome	1102546	1103196	-	651	41	33	32	30	21	34	36	68
b1041	Chromosome	1103951	1104406	+	456	18	23	25	31	99	87	12	15
b1042	Chromosome	1104447	1104902	+	456	24	29	30	30	71	68	25	77
b1043	Chromosome	1104961	1105293	+	333	13	10	7	12	2	6	6	7
b1044	Chromosome	1105414	1105725	+	312	16	30	13	10	33	33	139	130
b1045	Chromosome	1105820	1106353	+	534	75	78	45	58	360	328	563	542
b1046	Chromosome	1106355	1107776	+	1422	115	117	78	71	470	608	792	1074
b1047	Chromosome	1107784	1108941	-	1158	41	55	30	36	28	50	173	187
b1048	Chromosome	1109335	1110870	+	1536	485	423	397	358	3475	3404	4701	4483
b1049	Chromosome	1110863	1113406	+	2544	483	525	418	467	4006	3913	4385	4271
b1050	Chromosome	1113579	1113806	+	228	34	38	21	27	250	172	209	236
b1051	Chromosome	1113807	1114181	-	375	174	175	178	165	971	1006	824	797
b1053	Chromosome	1114264	1115490	-	1227	79	105	40	72	470	212	1014	467
b1054	Chromosome	1115662	1116582	-	921	112	129	122	117	425	434	960	939
b1055	Chromosome	1116807	1117859	+	1053	72	75	55	60	124	125	335	325
b1056	Chromosome	1117901	1118476	-	576	24	41	33	43	145	101	165	163
b1057	Chromosome	1118480	1119046	-	567	14	18	12	12	9	64	25	20
b1058	Chromosome	1119307	1119447	-	141	19	16	7	11	16	15	30	29
b1059	Chromosome	1119468	1120586	-	1119	169	170	120	112	961	939	1627	1629
b1060	Chromosome	1120701	1120955	-	255	22	27	18	23	356	340	192	187
b1061	Chromosome	1121242	1121487	-	246	10	10	7	12	34	30	95	93
b1062	Chromosome	1121561	1122607	-	1047	108	102	79	81	326	276	563	521
b1063	Chromosome	1122713	1123273	-	561	54	56	51	45	386	398	527	509
b1064	Chromosome	1123407	1124054	-	648	553	543	472	479	4887	4801	6154	6044
b1065	Chromosome	1124118	1125326	-	1209	55	51	41	42	139	152	128	147
b1066	Chromosome	1125562	1126146	+	585	122	112	86	95	761	736	1197	1193
b1067	Chromosome	1126157	1126804	+	648	152	164	127	130	812	818	1672	1628
b1068	Chromosome	1126806	1127729	+	924	145	156	92	89	641	622	897	871
b1069	Chromosome	1127839	1129374	+	1536	760	582	570	454	619	1293	936	1885
b1070	Chromosome	1129414	1129830	-	417	10	16	7	8	47	41	28	60
b1071	Chromosome	1129835	1130128	-	294	20	24	20	22	98	64	122	51
b1072	Chromosome	1130204	1130863	-	660	33	57	41	46	147	136	291	246
b1073	Chromosome	1131018	1131434	+	417	46	46	25	21	497	465	311	319
b1074	Chromosome	1131438	1131842	+	405	63	60	31	39	349	421	226	268
b1075	Chromosome	1131854	1132549	+	696	92	107	71	47	537	472	837	839
b1076	Chromosome	1132574	1133782	+	1209	217	196	152	156	1523	1476	1687	1508
b1077	Chromosome	1133802	1134557	+	756	52	50	40	45	107	191	532	674
b1078	Chromosome	1134729	1135511	+	783	64	65	26	41	361	250	527	427
b1079	Chromosome	1135564	1136262	+	699	33	36	12	17	125	122	42	50
b1080	Chromosome	1136274	1137371	+	1098	36	44	42	45	149	114	196	196
b1081	Chromosome	1137371	1138312	+	942	47	49	36	38	46	54	29	33
b1082	Chromosome	1138378	1140021	+	1644	69	90	65	73	212	227	128	100
b1083	Chromosome	1140033	1140986	+	954	61	65	31	35	333	318	248	235
b1084	Chromosome	1141182	1144367	-	3186	1171	1172	1004	1030	8332	7955	11515	11019
b1085	Chromosome	1144502	1144822	+	321	35	44	30	23	288	307	308	378
b1086	Chromosome	1144940	1145899	+	960	142	208	103	150	417	452	206	311
b1087	Chromosome	1146011	1146595	-	585	63	95	76	100	640	645	1313	1282
b4418	Chromosome	1146589	1146757	+	169	36	43	25	23	104	99	71	115
b1088	Chromosome	1146794	1147315	+	522	403	374	330	329	2459	3557	3878	5678
b1089	Chromosome	1147367	1147540	+	174	359	349	240	241	2972	2684	3306	3694
b1090	Chromosome	1147621	1148691	+	1071	261	253	224	191	912	1281	1628	1959
b1091	Chromosome	1148759	1149712	+	954	482	473	316	339	3393	3179	5002	4824
b1092	Chromosome	1149728	1150657	+	930	753	702	678	631	4933	5005	6872	7372
b1093	Chromosome	1150670	1151404	+	735	1931	2006	1409	1442	11872	11611	17780	17371
b1094	Chromosome	1151615	1151851	+	237	901	925	751	788	7146	6113	8204	7331
b1095	Chromosome	1151939	1153180	+	1242	437	462	338	354	2950	2663	4064	3737
b1096	Chromosome	1153300	1154109	+	810	46	55	45	36	51	30	264	239
b1097	Chromosome	1154112	1155134	+	1023	196	171	121	126	379	508	396	521
b1098	Chromosome	1155124	1155765	+	642	76	85	55	61	950	961	615	652
b1099	Chromosome	1155762	1156766	+	1005	46	420	39	306	814	759	464	277
b1100	Chromosome	1156777	1157574	+	798	108	112	86	98	757	685	777	765
b1101	Chromosome	1157869	1159302	+	1434	791	772	622	637	5487	5230	9327	9107
b1102	Chromosome	1159362	1161551	-	2190	79	83	50	69	239	197	308	236
b1103	Chromosome	1161885	1162244	+	360	257	259	222	223	1995	2087	3587	3474
b1104	Chromosome	1162247	1162624	+	378	108	108	101	96	542	538	518	554
b1105	Chromosome	1162638	1163279	+	642	330	324	259	261	1467	1753	3175	3804
b1106	Chromosome	1163260	1164084	+	825	78	92	36	32	478	767	462	1082
b1107	Chromosome	1164095	1165120	+	1026	391	402	344	324	3047	3243	3917	4106
b1108	Chromosome	1165143	1165685	+	543	311	320	294	311	2861	2300	3265	2994
b1109	Chromosome	1166085	1167389	+	1305	271	289	184	175	2412	2399	2723	2770
b1110	Chromosome	1167599	1168138	+	540	22	29	25	28	29	14	51	27
b1111	Chromosome	1168200	1168832	-	633	39	50	34	41	524	570	771	899
b1112	Chromosome	1169073	1169330	+	258	17	14	7	11	9	9	138	148
b1113	Chromosome	1169412	1170374	-	963	77	65	67	66	332	313	311	334
b1114	Chromosome	1170518	1173964	-	3447	346	387	286	310	1400	1309	2543	2542
b1115	Chromosome	1174092	1175165	-	1074	28	59	32	38	54	59	57	46
b1116	Chromosome	1175427	1176626	+	1200	86	101	53	80	317	312	503	536
b1117	Chromosome	1176619	1177320	+	702	70	86	85	75	354	384	629	729
b1118	Chromosome	1177320	1178564	+	1245	130	149	122	125	929	891	1041	1057
b1119	Chromosome	1178593	1179504	+	912	114	132	88	111	641	643	1184	1139
b1120	Chromosome	1179631	1180359	+	729	144	151	86	86	871	872	1101	1109
b1121	Chromosome	1180479	1181267	-	789	35	31	25	17	55	55	27	17
b1122	Chromosome	1181264	1181725	-	462	17	18	9	18	16	12	49	63
b1123	Chromosome	1181783	1182829	-	1047	616	607	425	437	4685	4528	6475	6206
b1124	Chromosome	1182826	1183620	-	795	86	96	60	78	772	644	862	825
b1125	Chromosome	1183617	1184444	-	828	348	284	245	205	224	215	444	324
b1126	Chromosome	1184458	1185594	-	1137	86	100	78	82	484	472	668	702
b1127	Chromosome	1185844	1187070	+	1227	1142	1123	879	850	9394	9092	11358	11003
b1128	Chromosome	1187119	1188240	-	1122	306	303	232	251	1531	1341	2568	2578
b1129	Chromosome	1188316	1189776	-	1461	162	180	100	104	1074	992	820	730
b1130	Chromosome	1189776	1190447	-	672	277	284	267	249	2874	2818	2216	2248
b1131	Chromosome	1190616	1191986	-	1371	172	188	165	160	998	1145	1641	1963
b1132	Chromosome	1191990	1192631	-	642	58	83	41	55	405	399	888	883
b1133	Chromosome	1192667	1193773	-	1107	152	184	141	141	918	909	1219	1217
b1134	Chromosome	1193827	1194288	-	462	30	43	37	45	143	171	99	91
b1135	Chromosome	1194298	1194951	-	654	307	460	265	357	667	431	906	577
b1136	Chromosome	1195123	1196373	+	1251	3010	2968	2235	2211	21838	21524	29881	28949
b1137	Chromosome	1196867	1197532	-	666	73	67	43	51	108	116	149	185
b1138	Chromosome	1197533	1198237	-	705	126	132	104	98	447	406	436	387
b1139	Chromosome	1198695	1199588	+	894	81	92	64	66	468	458	719	758
b1140	Chromosome	1199679	1200806	-	1128	52	120	35	83	81	118	186	184
b1141	Chromosome	1200787	1201032	-	246	10	5	11	8	9	8	11	9
b1143	Chromosome	1201497	1201838	+	342	46	41	36	30	56	60	271	275
b1144	Chromosome	1201776	1202084	-	309	10	13	9	13	63	81	10	4
b1145	Chromosome	1202259	1202933	-	675	44	66	37	57	432	217	768	413
b1146	Chromosome	1203024	1203224	+	201	26	19	11	13	72	67	72	62
b1147	Chromosome	1203268	1203825	+	558	61	55	39	51	42	39	41	38
b1148	Chromosome	1203822	1204160	+	339	9	11	5	7	39	12	4	7
b4692	Chromosome	1204170	1204403	+	234	10	8	3	4	3	4	17	39
b4693	Chromosome	1204404	1205537	+	1134	52	33	37	32	20	28	33	35
b1150	Chromosome	1205549	1205731	+	183	10	8	3	9	3	5	36	26
b1151	Chromosome	1205731	1206142	+	412	6	15	3	8	10	6	17	11
b1152	Chromosome	1206143	1206922	+	780	34	24	20	22	27	42	14	26
b1153	Chromosome	1206913	1207497	+	585	24	29	16	20	12	23	12	21
b1154	Chromosome	1207501	1208130	+	630	30	25	10	14	32	8	38	13
b1155	Chromosome	1208132	1208545	+	414	21	31	24	30	15	18	24	29
b1156	Chromosome	1208517	1209119	-	603	23	23	10	24	24	22	25	26
b1157	Chromosome	1209119	1209619	-	501	44	44	23	34	70	12	123	26
b1158	Chromosome	1209685	1210239	+	555	30	32	25	13	26	20	28	31
b1159	Chromosome	1210346	1211179	+	834	49	133	55	94	40	34	176	175
b4519	Chromosome	1211413	1211577	+	165	7	15	4	8	75	50	98	89
b1160	Chromosome	1211680	1212003	-	324	39	41	29	28	8	13	18	15
b1161	Chromosome	1212703	1213107	-	405	29	20	18	14	12	15	34	28
b1162	Chromosome	1213328	1214059	-	732	69	69	34	34	207	190	478	459
b1163	Chromosome	1214264	1215475	-	1212	51	63	46	28	119	681	177	1220
b1164	Chromosome	1215789	1216025	+	237	10	11	4	8	3	5	9	11
b1165	Chromosome	1216068	1216340	+	273	21	19	16	13	5	7	13	10
b1166	Chromosome	1216369	1216635	+	267	15	19	14	20	16	10	80	47
b1167	Chromosome	1216748	1216996	+	249	10	20	10	15	8	2	29	41
b1168	Chromosome	1217328	1218851	+	1524	52	114	35	74	42	98	174	215
b4520	Chromosome	1218983	1219201	+	219	16	14	14	17	11	4	5	6
b1171	Chromosome	1222305	1222634	-	330	21	27	11	12	35	7	153	101
b1172	Chromosome	1222644	1222988	-	345	20	23	12	17	5	5	11	13
b4593	Chromosome	1222990	1223163	-	174	6	9	11	3	3	2	6	6
b4594	Chromosome	1223264	1223449	+	186	5	6	7	6	42	10	73	9
b1174	Chromosome	1224279	1224545	-	267	91	110	47	56	1415	621	2436	915
b1175	Chromosome	1224549	1225361	-	813	343	340	259	232	3011	3017	4670	4778
b1176	Chromosome	1225385	1226080	-	696	130	129	117	127	598	629	1354	1352
b1177	Chromosome	1226600	1226968	+	369	68	75	43	57	229	202	493	395
b1178	Chromosome	1227071	1227472	-	402	139	152	86	92	474	448	1154	1112
b1179	Chromosome	1227714	1228007	+	294	42	54	41	35	227	297	397	444
b1180	Chromosome	1228079	1228738	+	660	166	390	123	292	409	440	332	367
b1181	Chromosome	1228815	1229276	+	462	22	27	11	16	273	236	205	160
b1182	Chromosome	1229483	1230394	-	912	97	102	84	82	180	150	385	335
b1183	Chromosome	1230767	1231186	+	420	15	14	22	21	9	32	54	59
b1184	Chromosome	1231186	1232454	+	1269	47	47	21	19	245	310	633	721
b1185	Chromosome	1232500	1233030	-	531	54	56	39	41	156	145	198	195
b1186	Chromosome	1233176	1234717	-	1542	224	225	170	173	1014	1041	1227	1105
b1187	Chromosome	1234938	1235657	+	720	90	98	74	88	796	761	952	965
b1188	Chromosome	1235709	1237241	-	1533	274	324	203	200	1152	1129	2183	2079
b1189	Chromosome	1237571	1238869	+	1299	173	486	159	345	683	689	869	868
b1190	Chromosome	1238879	1239949	+	1071	66	78	56	75	422	418	487	466
b1191	Chromosome	1240335	1242071	-	1737	139	168	127	128	957	871	731	729
b1192	Chromosome	1242166	1243080	-	915	54	61	45	36	276	231	139	170
b1193	Chromosome	1243180	1243791	+	612	47	48	27	30	57	88	49	33
b1194	Chromosome	1243793	1244527	-	735	22	26	22	17	72	62	123	184
b1195	Chromosome	1244728	1244982	+	255	21	20	21	21	68	58	159	156
b1196	Chromosome	1245160	1245600	+	441	25	25	16	25	131	37	223	92
b1197	Chromosome	1245679	1247376	-	1698	223	268	193	221	1323	1440	1833	2091
b1198	Chromosome	1247696	1249114	-	1419	73	99	61	96	311	326	371	390
b1199	Chromosome	1249125	1249757	-	633	44	60	51	42	189	146	110	84
b1200	Chromosome	1249768	1250838	-	1071	157	171	128	153	550	587	767	784
b1201	Chromosome	1251066	1252985	+	1920	170	255	105	167	356	332	670	634
b1202	Chromosome	1253085	1255952	-	2868	206	195	146	145	293	275	211	136
b1203	Chromosome	1256721	1257812	-	1092	213	227	158	167	1273	1204	1756	1630
b1204	Chromosome	1257929	1258513	-	585	30	39	31	30	256	291	205	214
b1205	Chromosome	1258791	1259069	+	279	510	550	479	523	5861	5226	4755	4550
b1206	Chromosome	1259124	1260803	-	1680	205	188	118	111	434	399	613	500
b1207	Chromosome	1260928	1261875	-	948	411	408	322	326	3513	3177	4033	3875
b1208	Chromosome	1262026	1262877	-	852	229	227	164	155	992	1762	1850	2689
b1209	Chromosome	1262877	1263500	-	624	140	141	57	55	347	407	793	928
b1210	Chromosome	1263714	1264970	+	1257	114	126	111	111	381	382	544	577
b1211	Chromosome	1265012	1266094	+	1083	131	151	110	107	621	557	801	702
b1212	Chromosome	1266094	1266927	+	834	56	49	24	23	127	162	193	206
b1213	Chromosome	1266924	1267316	+	393	28	31	16	15	13	49	164	201
b1214	Chromosome	1267320	1268129	+	810	141	112	88	99	233	353	931	1003
b1215	Chromosome	1268165	1269019	+	855	329	333	280	285	3210	2971	3885	3521
b4419	Chromosome	1269168	1269275	-	108	7	3	1	5	31	32	14	8
b4420	Chromosome	1269323	1269389	+	67	6	2	1	4	0	2	5	8
b4421	Chromosome	1269703	1269810	-	108	2	10	2	6	15	9	27	7
b4422	Chromosome	1269858	1269923	+	66	3	7	1	2	15	10	14	8
b4423	Chromosome	1270238	1270345	-	108	1	6	5	2	32	44	18	5
b4424	Chromosome	1270393	1270460	+	68	2	2	0	1	21	16	15	15
b1216	Chromosome	1270749	1271849	-	1101	92	97	50	49	530	475	485	458
b1217	Chromosome	1272119	1272349	+	231	22	29	29	40	135	115	95	263
b1218	Chromosome	1272507	1273202	+	696	103	123	86	92	275	274	481	282
b1219	Chromosome	1273246	1273599	-	354	116	113	79	89	880	804	1132	1192
b1220	Chromosome	1273784	1275178	+	1395	82	75	57	62	337	325	353	314
b1221	Chromosome	1275179	1275829	-	651	298	325	256	242	2103	1884	2906	2539
b1222	Chromosome	1275822	1277618	-	1797	183	185	136	135	649	754	1342	1555
b1223	Chromosome	1277957	1279348	+	1392	640	661	483	490	4716	4452	6662	6533
b1224	Chromosome	1279864	1283607	+	3744	2744	2638	2318	2224	18921	18749	24802	24701
b1225	Chromosome	1283604	1285142	+	1539	1505	1411	1195	1169	9926	9654	13140	12825
b1226	Chromosome	1285139	1285849	+	711	536	517	411	419	3934	3919	5060	5259
b1227	Chromosome	1285849	1286526	+	678	941	943	750	746	6116	5554	9410	8542
b4425	Chromosome	1287066	1287236	-	171	0	8	1	4	2	1	4	1
b1229	Chromosome	1287087	1287176	-	90	0	0	0	0	0	0	0	0
b1230	Chromosome	1287244	1287328	-	85	12	28	12	6	46	43	45	28
b1231	Chromosome	1287538	1287622	-	85	15	36	10	16	58	33	55	38
b1232	Chromosome	1287782	1288624	-	843	84	93	51	56	726	576	852	701
b1233	Chromosome	1288674	1289132	-	459	39	26	39	42	97	226	246	359
b1234	Chromosome	1289245	1290150	+	906	113	119	97	113	690	688	590	827
b1235	Chromosome	1290242	1291255	+	1014	74	71	76	74	347	276	607	541
b1236	Chromosome	1291457	1292365	+	909	374	368	339	339	2976	2755	4197	4108
b1237	Chromosome	1292509	1292922	-	414	2015	2031	1806	1844	18296	17732	26709	25968
b1238	Chromosome	1293527	1294144	+	618	25	33	20	28	126	100	25	25
b1241	Chromosome	1295446	1298121	-	2676	12968	12941	10740	10746	118089	113757	167375	163352
b1242	Chromosome	1298598	1299245	+	648	43	50	52	63	177	185	441	479
b1243	Chromosome	1301182	1302813	+	1632	3202	3181	2596	2539	26666	25123	37194	35484
b1244	Chromosome	1302899	1303819	+	921	461	471	333	330	3972	3726	5749	5308
b1245	Chromosome	1303834	1304742	+	909	780	794	586	627	4839	4803	5235	4934
b1246	Chromosome	1304754	1305767	+	1014	862	836	734	724	6334	6120	8799	8779
b1247	Chromosome	1305764	1306768	+	1005	1008	980	819	787	7935	7147	9664	9101
b1248	Chromosome	1306821	1307150	-	330	25	35	19	29	128	99	200	225
b1249	Chromosome	1307185	1308645	-	1461	168	125	115	109	437	389	913	873
b4595	Chromosome	1308788	1308961	+	174	4	9	5	5	4	5	27	14
b1250	Chromosome	1309016	1310269	-	1254	66	80	52	53	461	456	515	431
b1251	Chromosome	1310569	1310865	-	297	38	35	21	22	358	345	235	241
b1252	Chromosome	1311089	1311808	+	720	22	29	29	30	85	54	293	324
b1253	Chromosome	1311848	1312246	-	399	25	59	8	42	10	9	158	155
b1254	Chromosome	1312351	1312890	-	540	50	60	70	71	234	225	533	471
b1255	Chromosome	1312920	1313663	-	744	66	55	30	31	177	189	432	499
b1256	Chromosome	1314020	1314658	+	639	5361	5347	4271	4341	45336	41877	53543	51458
b1257	Chromosome	1314718	1315224	-	507	56	94	41	70	297	249	313	260
b1258	Chromosome	1315270	1315770	-	501	34	34	21	17	161	125	183	171
b1259	Chromosome	1315856	1316035	-	180	12	18	11	10	1	2	15	8
b1260	Chromosome	1316416	1317222	-	807	87	82	67	66	335	334	473	434
b1261	Chromosome	1317222	1318415	-	1194	103	108	109	122	345	352	688	719
b1262	Chromosome	1318427	1319788	-	1362	59	77	50	60	291	65	670	185
b1263	Chromosome	1319789	1321384	-	1596	75	100	61	81	66	81	118	109
b1264	Chromosome	1321384	1322946	-	1563	86	85	51	81	431	138	699	183
b1265	Chromosome	1323038	1323082	-	45	0	1	2	0	1	1	0	2
b1266	Chromosome	1323220	1324101	+	882	80	76	66	69	358	365	588	693
b1267	Chromosome	1324098	1324718	+	621	82	80	137	134	928	923	1698	1499
b1268	Chromosome	1324746	1326641	+	1896	137	158	117	109	157	177	270	353
b1269	Chromosome	1326852	1327727	+	876	124	154	96	115	536	543	534	598
b1270	Chromosome	1327767	1328357	-	591	46	64	52	64	490	482	368	349
b1271	Chromosome	1328354	1329112	-	759	67	64	79	77	465	455	366	390
b1272	Chromosome	1329332	1330381	+	1050	120	130	91	98	941	702	1101	698
b1273	Chromosome	1330417	1330668	-	252	43	46	42	40	513	489	611	566
b1274	Chromosome	1331048	1333645	+	2598	475	444	358	403	2617	2699	3520	3363
b1275	Chromosome	1333855	1334829	+	975	73	71	100	94	636	616	677	702
b4522	Chromosome	1335124	1335288	+	165	25	28	19	23	56	86	190	181
b4523	Chromosome	1335291	1335458	+	168	19	18	23	20	69	69	70	116
b1276	Chromosome	1335831	1338506	+	2676	757	783	615	633	4447	4311	6893	6838
b1277	Chromosome	1338570	1339160	-	591	64	58	45	52	455	431	958	944
b1278	Chromosome	1339330	1340094	+	765	65	176	72	194	383	441	253	255
b1279	Chromosome	1340243	1340551	+	309	57	56	82	72	296	299	497	476
b1280	Chromosome	1340558	1341727	+	1170	80	103	82	92	623	575	506	441
b1281	Chromosome	1341921	1342658	+	738	60	62	35	44	75	129	477	462
b1282	Chromosome	1342658	1342984	+	327	19	19	22	20	63	54	82	83
b1283	Chromosome	1343110	1343328	-	219	58	69	18	23	115	335	494	954
b1284	Chromosome	1343597	1344346	-	750	98	86	65	61	581	411	744	599
b4596	Chromosome	1344436	1344609	-	174	32	44	36	37	220	476	341	539
b1285	Chromosome	1344757	1346742	-	1986	133	128	90	95	525	497	872	871
b4672	Chromosome	1346796	1346900	+	105	45	106	31	61	167	115	299	215
b1286	Chromosome	1346978	1348912	-	1935	194	221	177	175	1676	1691	2102	2088
b1287	Chromosome	1348980	1350107	-	1128	56	60	57	59	738	137	1475	484
b1288	Chromosome	1350251	1351039	-	789	923	893	805	823	8025	7655	10176	9720
b1289	Chromosome	1351407	1351760	-	354	25	31	18	19	38	51	135	87
b1290	Chromosome	1351828	1352634	-	807	73	84	53	43	303	294	596	534
b1291	Chromosome	1352636	1353628	-	993	85	94	62	67	519	491	567	571
b1292	Chromosome	1353628	1354518	-	891	78	82	68	73	474	454	698	664
b1293	Chromosome	1354505	1355470	-	966	59	67	47	60	177	193	364	385
b1294	Chromosome	1355467	1357110	-	1644	108	135	111	123	840	762	834	754
b1295	Chromosome	1357423	1357668	-	246	14	16	5	6	83	71	126	93
b1296	Chromosome	1357802	1359187	-	1386	77	65	75	50	62	62	144	209
b1297	Chromosome	1359490	1360908	-	1419	65	81	42	46	74	85	37	54
b1298	Chromosome	1361120	1361884	+	765	32	33	25	32	48	83	140	136
b1299	Chromosome	1361911	1362468	+	558	23	27	15	21	196	155	101	90
b1300	Chromosome	1362743	1364230	+	1488	80	77	57	52	65	85	102	107
b1301	Chromosome	1364232	1365512	+	1281	68	69	46	62	34	43	28	31
b1302	Chromosome	1365550	1366815	+	1266	72	86	69	48	188	166	38	44
b1303	Chromosome	1366935	1367912	-	978	77	78	76	63	128	152	488	531
b1304	Chromosome	1368079	1368747	+	669	149	137	143	127	606	585	1248	1138
b1305	Chromosome	1368801	1369025	+	225	19	12	5	13	117	79	204	153
b1306	Chromosome	1369025	1369384	+	360	49	45	35	32	195	220	30	27
b1307	Chromosome	1369393	1369614	+	222	18	22	18	25	44	38	162	235
b1308	Chromosome	1369689	1370003	+	315	83	89	61	56	785	807	1553	1519
b1309	Chromosome	1370216	1371895	+	1680	90	111	56	77	94	58	77	105
b1310	Chromosome	1371909	1373201	+	1293	59	67	48	45	42	53	298	292
b1311	Chromosome	1373222	1374103	+	882	53	45	45	36	250	39	386	74
b1312	Chromosome	1374090	1374932	+	843	38	34	24	44	22	35	153	137
b1313	Chromosome	1374963	1376015	+	1053	135	123	84	89	68	82	105	111
b1314	Chromosome	1376034	1376822	+	789	39	55	52	35	131	154	95	101
b1315	Chromosome	1376832	1377887	+	1056	47	43	39	38	124	126	39	52
b1316	Chromosome	1377884	1380151	+	2268	77	120	70	98	168	186	289	297
b1317	Chromosome	1380148	1380807	+	660	16	38	17	26	43	57	57	75
b1319	Chromosome	1381947	1382852	+	906	32	38	18	37	60	74	86	59
b1320	Chromosome	1382963	1383961	-	999	37	37	20	31	195	206	85	107
b1321	Chromosome	1384117	1385514	+	1398	69	94	76	77	279	251	278	333
b1322	Chromosome	1385511	1386572	+	1062	59	88	53	63	227	212	290	272
b1323	Chromosome	1386720	1388261	+	1542	240	232	248	244	1321	1260	2309	2286
b1324	Chromosome	1388305	1388811	-	507	919	919	737	775	7511	7264	10199	10144
b1325	Chromosome	1388930	1389895	+	966	102	164	63	100	196	185	446	398
b1326	Chromosome	1389870	1390598	-	729	94	80	88	76	364	313	500	471
b4525	Chromosome	1390725	1390862	-	138	34	25	10	5	125	130	140	214
b4673	Chromosome	1390868	1390933	-	66	1	0	1	1	0	0	2	2
b1327	Chromosome	1390933	1391853	-	921	38	129	26	127	89	82	230	215
b1328	Chromosome	1391991	1392890	+	900	50	50	29	30	192	184	222	221
b1329	Chromosome	1393227	1394840	+	1614	178	176	108	128	919	953	996	1057
b1330	Chromosome	1394891	1395922	-	1032	77	73	61	46	309	295	375	360
b1331	Chromosome	1396076	1397092	+	1017	104	126	91	107	1198	1000	1612	1468
b1332	Chromosome	1397365	1397622	+	258	36	34	30	32	364	356	370	350
b1333	Chromosome	1397672	1398622	-	951	780	778	529	569	6451	6142	8956	8778
b1334	Chromosome	1398774	1399526	-	753	217	218	186	191	2282	2310	1918	1892
b1335	Chromosome	1399721	1400236	-	516	50	69	33	63	137	194	275	326
b1336	Chromosome	1400247	1401773	-	1527	84	126	69	85	75	81	214	227
b1337	Chromosome	1401810	1403255	-	1446	56	55	37	45	141	122	130	142
b1338	Chromosome	1403255	1404565	-	1311	63	61	40	48	117	125	147	181
b1339	Chromosome	1404741	1405649	+	909	60	52	33	32	89	88	196	184
b4426	Chromosome	1405656	1405751	-	96	4	6	4	2	2	9	8	15
b1340	Chromosome	1405979	1406542	+	564	35	38	20	29	77	100	151	95
b1341	Chromosome	1406563	1407795	-	1233	133	192	82	125	705	4788	745	8297
b1342	Chromosome	1408050	1409033	+	984	128	149	119	143	379	366	1136	1084
b4699	Chromosome	1409129	1409250	+	122	85	120	40	70	1024	515	1271	795
b1343	Chromosome	1409511	1410884	+	1374	81	84	65	73	216	215	306	335
b1344	Chromosome	1411013	1411948	-	936	56	52	40	46	62	61	326	275
b1345	Chromosome	1412000	1413235	-	1236	1068	828	966	714	938	2535	1477	3285
b1346	Chromosome	1413237	1413452	-	216	10	11	5	5	0	2	15	23
b1347	Chromosome	1413531	1413740	-	210	15	9	10	12	26	9	30	10
b1348	Chromosome	1413733	1413927	-	195	12	11	11	13	6	3	63	39
b1349	Chromosome	1413984	1414793	-	810	26	35	16	27	38	39	59	69
b1350	Chromosome	1414786	1417386	-	2601	105	128	74	74	108	293	110	393
b1351	Chromosome	1417488	1417763	-	276	40	30	21	17	46	21	80	34
b4526	Chromosome	1417838	1418008	-	171	8	12	9	11	4	7	9	13
b1352	Chromosome	1418008	1418229	-	222	8	7	5	6	11	4	17	5
b1353	Chromosome	1418671	1419159	+	489	17	22	13	12	84	79	23	27
b4527	Chromosome	1419156	1419311	-	156	9	14	7	4	2	4	7	9
b1355	Chromosome	1419322	1419456	-	135	7	7	6	9	18	1	1	1
b1356	Chromosome	1419765	1420241	-	477	89	76	55	61	473	380	477	431
b1357	Chromosome	1420365	1420661	+	297	11	8	4	8	10	5	41	24
b1358	Chromosome	1420684	1421106	+	423	17	19	11	19	26	21	35	21
b1359	Chromosome	1421119	1421976	+	858	56	55	36	42	396	88	603	102
b1360	Chromosome	1421983	1422729	+	747	20	25	11	16	35	17	202	196
b1361	Chromosome	1422701	1423200	+	500	29	31	26	28	15	15	71	65
b1362	Chromosome	1423201	1423644	+	444	7	5	1	7	6	4	8	5
b4528	Chromosome	1423400	1423585	+	186	0	0	0	0	0	0	0	0
b1363	Chromosome	1423782	1425239	+	1458	140	150	84	112	285	273	425	378
b1365	Chromosome	1425377	1425640	+	264	11	8	8	1	5	6	13	10
b1366	Chromosome	1425630	1426082	+	453	24	28	21	22	53	25	29	36
b1368	Chromosome	1426454	1427386	+	933	41	46	37	33	86	106	51	93
b1370	Chromosome	1427746	1428726	-	981	91	91	60	42	503	428	580	542
b1372	Chromosome	1429049	1432411	+	3363	279	313	234	243	269	277	410	452
b1373	Chromosome	1432411	1432986	+	576	10	10	10	5	45	28	26	22
b1374	Chromosome	1433084	1433674	-	591	28	32	11	29	13	5	34	17
b1375	Chromosome	1433991	1434224	-	234	12	16	13	10	23	22	12	10
b4638	Chromosome	1434958	1435008	-	51	7	7	9	4	42	64	8	100
b1376	Chromosome	1435185	1435619	-	435	664	669	507	524	5249	5150	8284	8406
b1377	Chromosome	1435760	1436893	-	1134	572	635	508	496	6204	3815	9356	5972
b4427	Chromosome	1437121	1437229	+	109	31	5	31	4	18	8	41	27
b1378	Chromosome	1437260	1440784	-	3525	598	617	433	463	4296	3947	5687	5492
b4529	Chromosome	1441058	1441324	+	267	111	105	94	96	414	401	227	189
b1379	Chromosome	1441321	1441743	-	423	29	28	34	30	155	121	404	411
b1380	Chromosome	1441854	1442843	-	990	296	292	190	185	2124	2122	1838	1793
b1381	Chromosome	1443051	1445690	+	2640	132	159	89	109	643	620	655	735
b1382	Chromosome	1445687	1445872	+	186	11	12	3	5	9	25	5	7
b1383	Chromosome	1445880	1446206	+	327	28	33	10	15	167	137	6	9
b1384	Chromosome	1446378	1447283	-	906	46	41	23	32	77	50	156	114
b1385	Chromosome	1447519	1449018	+	1500	63	77	35	49	92	90	351	376
b1386	Chromosome	1449076	1451349	-	2274	75	92	50	68	190	196	204	215
b1387	Chromosome	1451597	1453642	-	2046	71	73	45	46	97	87	71	83
b1388	Chromosome	1453927	1454856	+	930	40	37	26	42	13	44	39	57
b1389	Chromosome	1454868	1455155	+	288	8	7	9	9	8	10	20	7
b1390	Chromosome	1455164	1455910	+	747	28	21	29	13	76	85	67	95
b1391	Chromosome	1455925	1456422	+	498	34	24	16	20	30	43	91	97
b1392	Chromosome	1456430	1457500	+	1071	39	55	27	34	22	43	34	40
b1393	Chromosome	1457497	1458264	+	768	35	48	23	37	67	37	174	203
b1394	Chromosome	1458264	1459052	+	789	39	34	15	30	50	46	185	141
b1395	Chromosome	1459054	1460481	+	1428	70	69	41	43	44	34	76	64
b1396	Chromosome	1460471	1460893	+	423	14	25	15	22	7	11	11	8
b1397	Chromosome	1460893	1462098	+	1206	44	34	41	24	18	29	64	104
b1398	Chromosome	1462125	1463438	+	1314	59	77	34	56	56	49	239	226
b1399	Chromosome	1463539	1464489	+	951	150	128	101	111	897	865	673	642
b1400	Chromosome	1464471	1465061	+	591	57	67	62	76	142	125	490	452
b4674	Chromosome	1465165	1465230	-	66	28	26	22	29	24	19	36	34
b1402	Chromosome	1467921	1468826	-	906	29	36	22	16	83	82	117	94
b1403	Chromosome	1468784	1469149	-	366	20	17	6	11	64	81	81	99
b1404	Chromosome	1469358	1470509	+	1152	52	53	34	38	308	339	370	374
b1406	Chromosome	1474221	1475081	+	861	140	196	104	139	1048	1035	1320	1313
b1407	Chromosome	1475144	1477450	+	2307	79	119	54	73	60	64	226	163
b1408	Chromosome	1477621	1478226	+	606	16	27	18	15	29	53	54	124
b1409	Chromosome	1478226	1479122	+	897	38	48	20	31	93	31	142	66
b1410	Chromosome	1479138	1480895	+	1758	62	91	41	40	50	79	144	156
b1411	Chromosome	1480909	1482201	+	1293	74	92	46	62	46	291	95	562
b1412	Chromosome	1482255	1482860	-	606	74	77	47	54	266	269	410	380
b1413	Chromosome	1483061	1486963	+	3903	725	806	410	451	3374	3366	6084	6165
b1414	Chromosome	1487235	1488035	+	801	45	123	38	115	309	343	75	67
b1415	Chromosome	1488232	1489671	+	1440	274	271	238	226	1617	1634	2070	2113
b1418	Chromosome	1490902	1491432	+	531	156	153	78	84	734	786	1269	1361
b4597	Chromosome	1491443	1491506	-	64	28	20	12	9	163	158	104	33
b1419	Chromosome	1491677	1491850	+	174	121	130	107	103	818	763	1282	1207
b4428	Chromosome	1491922	1492071	-	150	14	20	7	3	170	57	288	134
b1420	Chromosome	1491962	1492129	-	168	15	15	9	13	213	302	251	543
b4429	Chromosome	1492119	1492174	+	56	9	13	8	7	272	89	170	66
b1421	Chromosome	1492470	1494110	+	1641	59	75	39	33	110	138	80	144
b1422	Chromosome	1494148	1495071	-	924	37	32	23	19	1090	150	1916	366
b1423	Chromosome	1495288	1496631	+	1344	159	161	108	107	615	761	541	836
b1424	Chromosome	1496856	1498511	+	1656	163	170	87	114	869	916	1127	1116
b1426	Chromosome	1498651	1498875	+	225	204	206	189	181	1742	1607	1598	1490
b1427	Chromosome	1498938	1499477	+	540	77	87	53	64	862	774	631	617
b1428	Chromosome	1499469	1500449	-	981	40	48	35	36	279	280	155	162
b1429	Chromosome	1500573	1501565	+	993	75	75	35	44	242	284	292	324
b1430	Chromosome	1501562	1502155	+	594	82	120	50	77	386	363	909	855
b1431	Chromosome	1502457	1503125	+	669	99	75	74	74	681	640	1248	1254
b4578	Chromosome	1503218	1503649	-	432	28	30	11	13	82	76	120	79
b1432	Chromosome	1503717	1504865	+	1149	125	105	101	101	752	823	426	521
b1433	Chromosome	1504905	1506080	-	1176	43	66	37	45	408	467	137	149
b1434	Chromosome	1506172	1506708	+	537	34	35	23	24	276	275	218	199
b1435	Chromosome	1506781	1508742	+	1962	107	120	85	73	317	324	745	867
b1436	Chromosome	1508834	1509064	-	231	12	16	5	6	47	41	10	9
b4532	Chromosome	1509286	1509462	+	177	5	11	22	17	33	56	70	108
b1438	Chromosome	1509508	1509924	+	417	37	37	24	41	153	182	142	216
b1439	Chromosome	1510003	1511409	+	1407	56	76	45	39	237	145	339	180
b1440	Chromosome	1511654	1512799	+	1146	104	105	54	57	443	430	796	926
b1441	Chromosome	1512817	1513830	+	1014	47	36	35	43	99	88	181	139
b1442	Chromosome	1513831	1514772	+	942	60	68	48	55	163	143	93	87
b1443	Chromosome	1514762	1515556	+	795	49	62	40	53	221	202	271	244
b1444	Chromosome	1515578	1517002	+	1425	241	230	194	195	1426	1131	2492	1918
b4598	Chromosome	1517099	1517194	-	96	36	27	26	42	263	697	103	1003
b1445	Chromosome	1517389	1517562	+	174	17	16	16	16	5	4	59	53
b1446	Chromosome	1517648	1517881	+	234	37	38	43	51	369	357	369	356
b1447	Chromosome	1517882	1518331	-	450	11	27	13	22	55	41	246	210
b1448	Chromosome	1518328	1518846	-	519	44	46	35	37	308	332	84	73
b1449	Chromosome	1519027	1520064	+	1038	145	142	175	161	1123	1090	1465	1419
b1450	Chromosome	1520262	1520927	+	666	27	26	25	31	53	30	34	52
b1451	Chromosome	1520963	1523065	-	2103	59	69	65	63	29	60	118	127
b1452	Chromosome	1523307	1524368	+	1062	35	93	24	42	23	33	139	141
b1453	Chromosome	1524481	1525980	-	1500	63	91	60	65	115	104	273	291
b1454	Chromosome	1526247	1526864	+	618	31	40	28	18	58	45	128	140
b1455	Chromosome	1526940	1527152	+	213	37	39	19	13	19	24	47	35
b1456	Chromosome	1527902	1529938	+	2037	76	102	54	63	129	101	58	69
b1457	Chromosome	1529922	1530404	+	483	107	91	59	72	81	101	230	270
b1460	Chromosome	1531816	1532952	+	1137	36	30	15	19	23	44	20	25
b1461	Chromosome	1533052	1533285	+	234	24	20	11	9	124	152	100	83
b1462	Chromosome	1533282	1533851	-	570	39	60	38	43	144	75	137	131
b1463	Chromosome	1534024	1534869	+	846	95	112	72	72	123	111	236	232
b1464	Chromosome	1534965	1535858	-	894	58	57	31	42	360	661	699	1255
b1465	Chromosome	1535937	1536617	-	681	33	43	18	30	63	46	150	127
b1466	Chromosome	1536614	1537309	-	696	37	35	23	27	11	15	93	82
b1467	Chromosome	1537309	1538853	-	1545	100	104	57	57	184	197	227	235
b1468	Chromosome	1538850	1542590	-	3741	502	215	384	197	480	538	952	961
b1469	Chromosome	1542672	1544060	-	1389	91	87	68	53	242	244	321	283
b1472	Chromosome	1545750	1546028	-	279	16	10	9	6	29	25	53	22
b1473	Chromosome	1546288	1547169	-	882	63	61	36	48	266	248	322	337
b1474	Chromosome	1547401	1550448	+	3048	565	562	416	418	3625	3555	4049	3902
b1475	Chromosome	1550461	1551345	+	885	149	142	73	67	599	611	1421	1362
b1476	Chromosome	1551338	1551991	+	654	65	70	61	64	399	792	579	1377
b1477	Chromosome	1552398	1552682	-	285	26	34	38	39	151	151	208	195
b1478	Chromosome	1552828	1553838	-	1011	81	70	63	52	341	357	413	394
b1479	Chromosome	1553972	1555669	-	1698	738	694	536	511	4639	4376	5647	5473
b1480	Chromosome	1555826	1555963	-	138	520	474	347	325	3615	3687	6219	6428
b1481	Chromosome	1556065	1556280	-	216	18	8	4	6	15	11	5	11
b1482	Chromosome	1556625	1557056	+	432	112	129	89	99	678	676	1307	1282
b1483	Chromosome	1557112	1558038	-	927	47	65	23	53	67	56	149	143
b1484	Chromosome	1558031	1559017	-	987	32	46	42	32	58	68	36	51
b1485	Chromosome	1559014	1559910	-	897	39	44	24	36	37	20	121	121
b1486	Chromosome	1559907	1560929	-	1023	59	73	32	55	52	64	164	114
b1487	Chromosome	1560931	1562481	-	1551	54	82	47	47	171	137	118	94
b1488	Chromosome	1562495	1563076	-	582	36	21	16	13	27	63	132	128
b1489	Chromosome	1563334	1565733	-	2400	95	101	58	80	191	268	201	372
b1490	Chromosome	1565758	1567140	-	1383	74	69	49	58	114	99	122	117
b1491	Chromosome	1567504	1568823	-	1320	50	49	53	48	183	184	185	226
b1492	Chromosome	1568954	1570489	-	1536	185	202	189	184	875	845	1388	1389
b1493	Chromosome	1570645	1572045	-	1401	467	505	371	378	3411	3255	5920	5936
b1494	Chromosome	1572407	1575202	-	2796	127	151	72	106	238	195	339	320
b1495	Chromosome	1575247	1577619	-	2373	115	92	73	75	320	655	249	870
b1496	Chromosome	1577657	1579342	-	1686	54	66	44	48	49	66	121	169
b1497	Chromosome	1579633	1580790	-	1158	60	50	38	41	156	191	490	541
b1498	Chromosome	1580842	1582524	-	1683	1109	1074	905	897	9734	9367	11987	11680
b1499	Chromosome	1582926	1583687	-	762	49	51	40	35	93	76	59	52
b1500	Chromosome	1583762	1583959	-	198	13	15	11	12	11	18	12	17
b1501	Chromosome	1584207	1586486	-	2280	144	126	91	82	246	206	275	189
b1502	Chromosome	1586820	1587734	-	915	24	328	13	215	17	18	31	70
b1503	Chromosome	1587793	1588296	-	504	29	22	14	18	24	17	30	30
b1504	Chromosome	1588309	1588839	-	531	32	28	16	16	22	6	32	21
b1505	Chromosome	1588853	1590079	-	1227	36	52	38	39	20	26	42	36
b1507	Chromosome	1590854	1592176	-	1323	97	108	73	104	451	469	549	578
b1508	Chromosome	1592176	1592442	-	267	27	35	15	9	212	229	330	365
b1511	Chromosome	1598617	1600209	-	1593	79	85	59	68	536	505	475	459
b1512	Chromosome	1600288	1601241	-	954	106	71	65	45	415	453	464	414
b1513	Chromosome	1601490	1603025	+	1536	81	76	71	73	205	261	174	245
b1514	Chromosome	1603019	1604047	+	1029	48	62	39	51	66	48	35	67
b1515	Chromosome	1604047	1605039	+	993	36	50	19	33	49	38	154	136
b1516	Chromosome	1605051	1606073	+	1023	125	129	107	125	401	376	769	687
b1517	Chromosome	1606100	1606975	+	876	58	60	59	57	273	290	887	949
b1518	Chromosome	1606999	1607289	+	291	30	39	17	24	58	79	143	53
b1519	Chromosome	1607346	1608104	+	759	45	45	39	48	192	208	97	163
b1520	Chromosome	1608108	1609022	-	915	39	38	30	31	58	39	212	196
b1521	Chromosome	1609229	1610680	-	1452	210	224	154	156	1720	1635	1725	1717
b1522	Chromosome	1610907	1611854	-	948	43	53	34	27	257	284	170	240
b1523	Chromosome	1611966	1612325	-	360	28	23	16	21	35	19	78	72
b1524	Chromosome	1612325	1613251	-	927	42	60	32	40	178	156	97	83
b1525	Chromosome	1613315	1614703	-	1389	93	104	131	125	408	436	354	477
b1526	Chromosome	1614804	1615685	+	882	66	75	64	38	120	123	23	23
b1527	Chromosome	1615763	1616878	+	1116	81	74	62	32	128	106	159	143
b1528	Chromosome	1617028	1618218	+	1191	53	48	51	50	98	71	162	172
b1529	Chromosome	1618243	1618908	-	666	53	55	42	44	165	128	58	58
b1530	Chromosome	1619120	1619554	+	435	36	26	25	17	62	67	24	64
b1531	Chromosome	1619574	1619957	+	384	30	34	19	18	88	86	220	287
b1532	Chromosome	1619989	1620207	+	219	6	26	6	14	8	5	114	58
b1533	Chromosome	1620238	1621137	-	900	72	87	49	68	222	312	325	493
b1534	Chromosome	1621332	1622519	+	1188	51	62	49	55	97	82	234	223
b4599	Chromosome	1622646	1622741	+	96	24	25	21	17	122	96	110	66
b4698	Chromosome	1622817	1622914	-	98	11	20	4	7	120	78	77	50
b1535	Chromosome	1622960	1623850	-	891	40	40	26	33	502	283	565	146
b1536	Chromosome	1624105	1624497	-	393	35	22	24	22	115	409	211	741
b1537	Chromosome	1624773	1625291	+	519	21	36	12	19	17	32	19	36
b1538	Chromosome	1625335	1627380	-	2046	443	425	302	330	3153	2987	4653	4604
b1539	Chromosome	1627517	1628263	+	747	325	353	398	372	3117	2977	4993	4799
b1540	Chromosome	1628352	1629038	+	687	36	51	34	37	375	309	723	678
b1541	Chromosome	1629215	1629418	+	204	196	219	186	197	1782	1542	2277	2174
b1542	Chromosome	1629453	1630913	-	1461	43	73	40	29	59	53	56	41
b1544	Chromosome	1633072	1633305	+	234	21	19	15	9	33	33	17	13
b1545	Chromosome	1633622	1634212	+	591	30	20	10	13	17	18	28	15
b1546	Chromosome	1634310	1634885	-	576	14	14	8	10	12	18	26	29
b1547	Chromosome	1634885	1635847	-	963	31	40	19	34	22	25	95	56
b1548	Chromosome	1635840	1636367	-	528	25	24	6	29	7	5	103	141
b4533	Chromosome	1636756	1636989	+	234	13	18	11	11	18	20	102	71
b1549	Chromosome	1637047	1637457	+	411	26	40	19	20	13	11	99	102
b1550	Chromosome	1637609	1637782	-	174	77	90	73	82	822	829	1357	1206
b1551	Chromosome	1637954	1638109	-	156	21	11	6	9	5	6	6	4
b1552	Chromosome	1638455	1638667	-	213	10	14	8	9	24	15	25	38
b1553	Chromosome	1639030	1639527	-	498	8	10	4	6	46	870	93	1646
b4689	Chromosome	1639080	1639334	-	255	0	0	0	0	0	0	0	0
b1554	Chromosome	1639524	1640057	-	534	19	30	9	19	32	30	15	10
b1555	Chromosome	1640054	1640365	-	312	16	17	14	17	57	18	12	8
b1556	Chromosome	1640370	1640585	-	216	5	18	2	4	13	31	14	10
b1557	Chromosome	1641339	1641554	-	216	8	9	9	8	121	102	86	17
b1558	Chromosome	1641855	1642067	+	213	6	8	7	6	29	19	14	26
b1559	Chromosome	1642489	1643241	-	753	24	39	35	39	21	21	259	182
b1560	Chromosome	1643255	1644304	-	1050	40	56	25	35	458	135	924	280
b1561	Chromosome	1644651	1644902	-	252	16	21	20	13	35	22	30	26
b1562	Chromosome	1645119	1645274	-	156	14	9	1	8	39	15	20	30
b1563	Chromosome	1645346	1645633	-	288	38	46	41	40	178	97	241	175
b1564	Chromosome	1645633	1645872	-	240	115	90	71	62	619	644	1190	1108
b1565	Chromosome	1645897	1646202	+	306	12	11	9	13	9	68	9	105
b1566	Chromosome	1646405	1646737	+	333	59	88	40	44	56	88	91	88
b1567	Chromosome	1647174	1647356	-	183	6	6	4	2	0	0	9	8
b1568	Chromosome	1647358	1647636	-	279	6	7	6	11	1	7	5	10
b1569	Chromosome	1647620	1647850	-	231	11	6	4	7	2	5	5	9
b1570	Chromosome	1647934	1648341	+	408	68	59	60	40	215	229	145	138
b1571	Chromosome	1648508	1648663	+	156	6	2	2	3	4	16	8	4
b1572	Chromosome	1648665	1648793	+	129	4	7	4	9	2	2	53	54
b1573	Chromosome	1648823	1649041	+	219	8	9	6	12	10	23	14	43
b1574	Chromosome	1649382	1649434	+	53	2	6	2	3	1	1	6	7
b1575	Chromosome	1649609	1649797	+	189	6	14	12	10	8	2	12	10
b1576	Chromosome	1649794	1649985	+	192	7	18	8	6	6	4	12	6
b1577	Chromosome	1650078	1650842	+	765	39	32	14	26	12	14	25	27
b1578	Chromosome	1650845	1651537	+	693	29	15	20	9	85	42	85	60
b1579	Chromosome	1651551	1652708	+	1158	45	72	49	49	105	73	246	196
b1580	Chromosome	1652896	1653915	-	1020	52	36	39	27	25	40	120	214
b1581	Chromosome	1653927	1655141	-	1215	53	49	41	50	151	138	160	199
b1582	Chromosome	1655347	1655673	-	327	10	23	16	24	56	101	87	146
b1583	Chromosome	1655808	1656149	+	342	81	84	68	70	929	970	847	882
b1584	Chromosome	1656184	1656744	+	561	45	47	61	77	391	394	778	754
b1585	Chromosome	1656747	1657457	-	711	45	57	37	33	136	133	498	471
b1586	Chromosome	1657565	1657870	+	306	66	71	36	42	77	74	462	452
b1587	Chromosome	1658069	1660495	+	2427	1105	1190	916	924	8826	8628	10924	10972
b1588	Chromosome	1660556	1662979	+	2424	1053	1056	795	790	8091	8043	11360	11314
b1589	Chromosome	1662990	1663607	+	618	191	194	182	179	1359	1032	3108	2801
b1590	Chromosome	1663609	1664463	+	855	277	287	210	220	1675	1553	2051	2050
b1591	Chromosome	1664506	1665120	+	615	120	110	53	59	766	710	919	902
b1592	Chromosome	1665315	1666571	+	1257	35	49	24	37	17	40	93	140
b1593	Chromosome	1666524	1667219	-	696	221	221	157	160	1238	1187	1715	1645
b1594	Chromosome	1667344	1668564	-	1221	359	363	253	292	2602	2646	3046	3050
b1595	Chromosome	1668699	1669592	-	894	38	58	33	40	112	143	158	135
b1596	Chromosome	1669699	1670952	+	1254	67	86	45	70	210	179	579	636
b1597	Chromosome	1671376	1671684	+	309	21	21	21	22	16	48	107	150
b4601	Chromosome	1671777	1671860	+	84	8	16	3	2	29	32	31	59
b1598	Chromosome	1671960	1672781	+	822	131	146	95	96	851	969	1298	1464
b1599	Chromosome	1672820	1673149	-	330	14	19	5	14	9	10	32	30
b1600	Chromosome	1673136	1673501	-	366	37	34	19	20	220	171	117	69
b1601	Chromosome	1673913	1674947	+	1035	74	97	50	68	496	354	669	451
b1602	Chromosome	1674972	1676360	-	1389	1224	1264	1039	1046	8721	8159	11983	11111
b1603	Chromosome	1676371	1677903	-	1533	1424	1459	1116	1164	11455	11391	15150	15073
b1604	Chromosome	1678427	1679371	+	945	347	331	234	240	2433	2340	2734	2667
b1605	Chromosome	1679557	1680939	+	1383	124	185	95	112	211	218	151	170
b1606	Chromosome	1680976	1681698	+	723	32	28	33	29	110	110	264	252
b1607	Chromosome	1681695	1682030	-	336	28	31	23	22	102	125	88	166
b1608	Chromosome	1682159	1682878	+	720	116	116	76	68	495	524	1431	1409
b1609	Chromosome	1682882	1684183	+	1302	117	133	105	98	367	269	841	725
b1610	Chromosome	1684259	1685188	+	930	40	57	22	44	239	244	88	149
b1611	Chromosome	1685185	1686588	-	1404	132	146	93	80	739	717	738	734
b1612	Chromosome	1686731	1688377	-	1647	507	507	373	379	3327	3203	4252	4147
b1613	Chromosome	1688576	1689751	+	1176	248	243	241	250	1605	1566	2788	2691
b1614	Chromosome	1689852	1691360	+	1509	483	495	465	503	4665	4558	5162	5036
b1615	Chromosome	1691586	1692851	-	1266	76	56	67	66	71	57	82	88
b1616	Chromosome	1692890	1694263	-	1374	150	162	112	83	165	262	204	237
b1617	Chromosome	1694260	1696071	-	1812	94	116	82	82	525	909	426	1147
b1618	Chromosome	1696462	1697052	-	591	75	73	72	90	360	269	563	539
b1619	Chromosome	1697273	1698040	-	768	286	294	275	274	2355	2257	2023	2086
b1620	Chromosome	1698152	1699180	-	1029	55	54	36	40	120	100	390	437
b1621	Chromosome	1699355	1700947	+	1593	162	178	164	177	1044	955	1592	1463
b1622	Chromosome	1700957	1702129	+	1173	112	132	91	114	830	768	1139	1113
b1623	Chromosome	1702233	1703234	+	1002	280	288	207	218	2273	2209	2974	2860
b1624	Chromosome	1703268	1704308	-	1041	85	90	66	73	586	549	994	953
b4409	Chromosome	1704551	1704676	+	126	11	9	3	1	31	7	66	62
b1625	Chromosome	1704949	1705164	+	216	8	10	7	9	5	8	5	10
b1626	Chromosome	1705250	1705690	+	441	10	33	13	18	102	100	123	124
b1627	Chromosome	1705767	1706348	+	582	26	28	21	28	35	13	91	94
b1628	Chromosome	1706348	1706926	+	579	59	40	34	19	6	20	117	96
b1629	Chromosome	1706919	1709141	+	2223	108	123	82	106	515	328	851	483
b1630	Chromosome	1709142	1710200	+	1059	66	69	54	61	336	314	525	492
b1631	Chromosome	1710204	1710824	+	621	32	30	25	33	73	76	190	210
b1632	Chromosome	1710828	1711523	+	696	55	61	41	45	194	185	249	301
b1633	Chromosome	1711523	1712158	+	636	29	32	27	37	31	53	402	413
b1634	Chromosome	1712769	1714271	+	1503	335	371	261	289	2269	2228	2889	2822
b1635	Chromosome	1714377	1714982	+	606	92	88	95	94	726	686	811	801
b1636	Chromosome	1715026	1715889	-	864	53	56	47	51	295	286	706	721
b1637	Chromosome	1715948	1717222	-	1275	303	301	317	326	2263	2234	3436	3362
b1638	Chromosome	1717351	1718007	-	657	114	118	77	72	625	652	1285	1283
b1639	Chromosome	1718066	1718395	-	330	18	23	14	9	30	46	105	114
b1640	Chromosome	1718493	1719602	-	1110	161	174	90	84	706	722	728	704
b1641	Chromosome	1719876	1720343	+	468	1052	1069	789	785	4824	4482	6068	6011
b1642	Chromosome	1720390	1720824	-	435	56	53	62	52	908	902	566	536
b1643	Chromosome	1721025	1721261	+	237	21	27	12	16	47	45	46	35
b1644	Chromosome	1721264	1722121	+	858	52	42	23	24	143	155	179	205
b1645	Chromosome	1722121	1724133	+	2013	112	103	69	65	389	284	211	172
b1646	Chromosome	1724134	1724655	-	522	95	97	63	56	682	675	717	648
b1647	Chromosome	1724736	1725632	-	897	274	284	197	204	1621	1554	2490	2583
b1648	Chromosome	1725681	1725920	-	240	14	13	1	4	51	52	5	6
b1649	Chromosome	1726023	1726622	+	600	20	33	16	27	102	97	264	286
b1650	Chromosome	1726659	1727756	+	1098	112	124	82	70	458	550	546	573
b1651	Chromosome	1727837	1728244	+	408	322	332	190	190	2054	1937	2550	2585
b1652	Chromosome	1728347	1728994	+	648	41	62	23	34	213	234	250	292
b1653	Chromosome	1729087	1733703	+	4617	333	337	258	250	777	906	1733	1935
b1654	Chromosome	1733754	1734101	-	348	76	73	117	114	481	458	717	725
b1655	Chromosome	1734435	1735250	+	816	67	89	34	45	291	293	359	299
b1656	Chromosome	1735378	1735959	+	582	2361	2374	1682	1664	17509	16878	26187	25701
b1657	Chromosome	1736121	1737290	-	1170	96	127	65	78	219	249	195	279
b4602	Chromosome	1737456	1737545	-	90	14	16	14	13	145	149	160	125
b1658	Chromosome	1737844	1738869	+	1026	149	146	109	125	446	460	394	500
b1659	Chromosome	1738866	1739798	-	933	37	44	39	43	168	154	186	154
b1660	Chromosome	1739911	1741122	+	1212	79	92	90	92	251	292	532	528
b1661	Chromosome	1741413	1742561	+	1149	381	395	407	392	2589	2368	5413	5193
b1662	Chromosome	1742601	1743242	-	642	148	143	58	57	654	676	1014	957
b1663	Chromosome	1743457	1744830	+	1374	111	116	80	100	344	311	773	766
b1664	Chromosome	1744871	1746127	-	1257	230	259	255	279	1617	1524	1610	1470
b1665	Chromosome	1746435	1746511	+	77	21	40	17	25	145	89	192	97
b1666	Chromosome	1746516	1746592	+	77	7	17	17	15	60	34	28	36
b1667	Chromosome	1746700	1747005	+	306	86	97	84	76	523	511	1152	1121
b1668	Chromosome	1747131	1748735	+	1605	81	114	69	75	265	278	216	218
b1669	Chromosome	1748747	1749559	-	813	39	45	21	15	183	182	149	182
b1670	Chromosome	1749563	1750348	-	786	72	70	20	38	177	174	303	285
b1671	Chromosome	1750345	1751013	-	669	37	53	41	49	476	298	485	123
b1672	Chromosome	1751077	1751724	-	648	58	41	38	42	178	192	88	89
b1673	Chromosome	1751728	1753830	-	2103	301	328	219	220	2474	2372	2692	2493
b1674	Chromosome	1753851	1754477	-	627	192	204	138	121	1302	1279	1643	1668
b1675	Chromosome	1754932	1755141	-	210	40	37	39	30	33	12	156	174
b1676	Chromosome	1755698	1757110	+	1413	1375	1410	1137	1150	13144	12687	18860	18731
b1677	Chromosome	1757421	1757657	+	237	7253	7380	5944	6020	69523	65696	93199	89916
b1678	Chromosome	1757721	1758725	-	1005	175	135	156	156	914	844	820	816
b1679	Chromosome	1758874	1759290	-	417	27	33	25	19	137	146	32	73
b1680	Chromosome	1759303	1760523	-	1221	65	73	50	64	636	596	539	555
b1681	Chromosome	1760520	1761791	-	1272	85	87	51	47	288	279	507	476
b1682	Chromosome	1761766	1762512	-	747	64	72	58	55	160	159	417	430
b1683	Chromosome	1762522	1764009	-	1488	119	129	73	79	653	623	1037	1026
b1684	Chromosome	1764018	1764386	-	369	30	30	35	32	193	200	195	217
b4430	Chromosome	1764713	1764780	-	68	1	1	1	1	3	2	4	3
b1685	Chromosome	1764934	1765122	-	189	75	82	46	34	573	469	492	455
b1686	Chromosome	1765222	1765632	-	411	73	84	41	38	422	448	358	359
b1687	Chromosome	1765629	1768685	-	3057	327	335	227	227	1664	1644	1778	1775
b1688	Chromosome	1769074	1770186	+	1113	156	181	120	141	677	602	1075	1158
b4431	Chromosome	1770372	1770477	+	106	12	8	6	3	5	8	10	12
b1689	Chromosome	1770615	1770971	+	357	15	23	8	11	689	137	1296	206
b1690	Chromosome	1771071	1772285	+	1215	39	32	28	29	46	21	98	78
b1691	Chromosome	1772512	1773777	+	1266	58	60	39	46	40	44	40	49
b1692	Chromosome	1773789	1774655	+	867	41	50	34	29	51	58	156	108
b1693	Chromosome	1774686	1775444	+	759	82	78	74	70	684	672	899	857
b1694	Chromosome	1775587	1777182	+	1596	86	98	74	68	186	214	200	134
b1695	Chromosome	1777196	1778347	+	1152	42	46	39	35	23	19	50	32
b1696	Chromosome	1778390	1779301	-	912	51	51	48	47	97	75	178	142
b1697	Chromosome	1779617	1780381	+	765	23	30	18	24	28	57	36	48
b1698	Chromosome	1780401	1781339	+	939	46	54	18	27	41	35	133	172
b1699	Chromosome	1781395	1782684	+	1290	60	73	38	45	18	54	133	182
b1700	Chromosome	1782681	1782974	+	294	12	14	3	7	1	11	4	28
b1701	Chromosome	1783031	1784677	+	1647	63	64	65	54	72	97	245	214
b1702	Chromosome	1784734	1787112	-	2379	1290	1349	990	1021	10379	9850	12886	12411
b1703	Chromosome	1787445	1788278	+	834	114	120	88	94	711	730	704	690
b1704	Chromosome	1788435	1789481	+	1047	85	302	57	240	69	46	231	238
b1705	Chromosome	1789613	1789804	+	192	11	17	4	5	61	113	11	6
b1706	Chromosome	1789808	1791244	-	1437	126	168	74	96	443	426	386	359
b1707	Chromosome	1791307	1792020	-	714	43	44	23	25	134	17	274	31
b1708	Chromosome	1792267	1792731	-	465	46	45	42	48	518	479	761	764
b1709	Chromosome	1792809	1793558	-	750	57	61	66	50	223	181	792	757
b1710	Chromosome	1793558	1794109	-	552	51	68	47	58	289	231	462	470
b1711	Chromosome	1794172	1795152	-	981	58	61	33	43	293	315	196	229
b1712	Chromosome	1795253	1795552	-	300	338	355	295	300	2198	1693	3843	3242
b1713	Chromosome	1795557	1797944	-	2388	1430	1452	1102	1129	10836	10756	12716	12963
b1714	Chromosome	1797959	1798942	-	984	348	357	332	338	2780	2965	3207	3145
b1715	Chromosome	1799226	1799270	-	45	5	5	2	10	1	9	17	37
b1716	Chromosome	1799393	1799749	-	357	991	991	806	794	9313	8077	11346	10358
b1717	Chromosome	1799802	1799999	-	198	399	463	338	367	4957	3865	7327	5570
b1718	Chromosome	1800096	1800638	-	543	607	577	543	582	4419	5424	5670	6870
b1719	Chromosome	1800642	1802570	-	1929	2681	2786	2116	2103	21673	20748	29516	29265
b4535	Chromosome	1805165	1805272	+	108	54	7	34	10	5	6	11	4
b1722	Chromosome	1805325	1806083	-	759	26	32	27	39	83	90	112	87
b1723	Chromosome	1806370	1807299	+	930	213	207	132	137	1835	2227	2896	3644
b1724	Chromosome	1807400	1807690	+	291	66	74	42	56	374	497	241	507
b1725	Chromosome	1807796	1808656	+	861	621	608	423	433	4861	4624	6970	6633
b1726	Chromosome	1808697	1809233	-	537	60	65	44	49	1044	225	1937	309
b1727	Chromosome	1809380	1810048	+	669	62	49	42	40	199	222	265	258
b1728	Chromosome	1810211	1810801	+	591	25	33	27	22	51	97	18	23
b1729	Chromosome	1810934	1812325	+	1392	321	309	191	221	2491	2258	3893	3821
b1730	Chromosome	1812329	1813132	-	804	42	49	20	29	5861	71	10560	190
b1731	Chromosome	1813421	1813663	-	243	10	6	4	6	2	4	42	16
b1732	Chromosome	1813867	1816128	+	2262	472	466	358	360	3170	3088	4821	4691
b1733	Chromosome	1816386	1817135	-	750	57	65	52	55	358	277	516	481
b1734	Chromosome	1817148	1818500	-	1353	111	100	62	79	182	251	246	308
b1735	Chromosome	1818605	1819447	-	843	85	60	45	60	208	176	324	355
b1736	Chromosome	1819455	1819805	-	351	39	35	39	33	218	217	455	482
b1737	Chromosome	1819856	1821214	-	1359	79	87	80	91	336	350	461	449
b1738	Chromosome	1821299	1821619	-	321	52	59	54	49	466	494	471	454
b1739	Chromosome	1821918	1822256	-	339	212	214	218	214	1316	1197	2345	2284
b1740	Chromosome	1822458	1823285	+	828	117	135	96	102	767	767	803	765
b1741	Chromosome	1823515	1824402	+	888	32	31	39	51	174	166	236	228
b1742	Chromosome	1824362	1824937	-	576	16	23	11	15	17	19	59	62
b1743	Chromosome	1825140	1825625	-	486	23	29	32	39	902	189	1736	384
b1744	Chromosome	1825955	1826923	-	969	32	41	21	35	37	29	17	44
b1745	Chromosome	1826916	1828259	-	1344	75	63	45	42	44	45	95	71
b1746	Chromosome	1828256	1829734	-	1479	63	77	58	80	38	34	219	171
b1747	Chromosome	1829731	1830765	-	1035	42	38	42	46	15	62	34	101
b1748	Chromosome	1830762	1831982	-	1221	29	52	26	57	34	32	61	87
b1749	Chromosome	1832428	1833234	+	807	119	124	70	95	374	363	966	956
b1750	Chromosome	1833401	1834111	+	711	65	76	40	48	118	124	148	182
b1751	Chromosome	1834116	1834793	+	678	91	96	141	146	903	864	1318	1325
b1752	Chromosome	1834808	1835515	+	708	56	66	60	58	398	361	309	340
b1753	Chromosome	1835515	1836063	+	549	48	62	33	39	251	271	388	356
b1754	Chromosome	1836073	1837239	+	1167	99	87	49	61	358	315	1062	999
b1755	Chromosome	1837212	1838747	+	1536	87	112	64	83	265	297	206	254
b1756	Chromosome	1838747	1839400	+	654	44	40	11	30	125	169	20	19
b1757	Chromosome	1839467	1840774	+	1308	478	487	383	384	5032	4869	5287	5179
b1758	Chromosome	1840783	1841403	-	621	37	32	21	30	178	111	89	53
b1759	Chromosome	1841490	1841897	+	408	25	33	12	12	44	40	85	72
b1760	Chromosome	1841863	1842135	-	273	12	12	5	5	2	7	2	5
b1761	Chromosome	1842371	1843714	+	1344	215	213	153	163	819	754	1228	1236
b1762	Chromosome	1843831	1844871	-	1041	48	61	38	55	45	107	144	195
b1763	Chromosome	1844999	1846960	-	1962	187	198	141	137	975	722	2302	1773
b1764	Chromosome	1846965	1848008	-	1044	372	397	301	306	2994	2934	3870	3914
b1765	Chromosome	1848125	1848676	-	552	138	141	129	112	676	671	350	337
b1766	Chromosome	1848837	1850693	+	1857	138	168	90	116	690	659	784	816
b1767	Chromosome	1850860	1851876	+	1017	80	80	53	47	333	106	854	439
b1768	Chromosome	1851887	1852528	+	642	42	50	22	19	83	94	180	211
b1769	Chromosome	1852621	1853979	-	1359	54	58	29	47	60	37	106	103
b1770	Chromosome	1854096	1854854	-	759	37	38	28	35	164	144	264	275
b1771	Chromosome	1854991	1855971	-	981	68	65	28	37	76	75	289	278
b1772	Chromosome	1855981	1856928	-	948	51	69	34	40	209	224	484	468
b1773	Chromosome	1856933	1857769	-	837	52	43	45	25	228	245	314	324
b1774	Chromosome	1857790	1858833	-	1044	33	59	52	44	285	215	501	400
b1775	Chromosome	1858850	1860229	-	1380	50	46	44	47	99	128	70	82
b1776	Chromosome	1860256	1861332	-	1077	39	37	29	38	26	21	114	122
b1777	Chromosome	1861702	1861974	-	273	55	61	31	39	264	128	299	201
b1778	Chromosome	1862016	1862429	-	414	124	127	146	135	519	678	939	1028
b1779	Chromosome	1862771	1863766	+	996	14623	14559	12068	12066	133660	127226	187254	180741
b1780	Chromosome	1863850	1864734	+	885	390	418	324	332	2922	2793	5371	5137
b1781	Chromosome	1864782	1865636	-	855	51	68	71	65	468	471	540	569
b1782	Chromosome	1865726	1866472	-	747	352	341	236	253	2662	2535	4170	4098
b1783	Chromosome	1866908	1868842	+	1935	474	536	330	349	2680	2672	3039	2830
b1784	Chromosome	1868955	1870238	+	1284	81	82	74	97	169	148	311	348
b1785	Chromosome	1870385	1871860	+	1476	133	136	70	91	172	177	218	212
b1786	Chromosome	1872041	1873531	+	1491	52	68	43	57	277	237	225	215
b1787	Chromosome	1873574	1874077	+	504	122	102	88	99	448	402	728	669
b1788	Chromosome	1874078	1874182	-	105	16	9	9	7	10	74	7	79
b1789	Chromosome	1874352	1874798	+	447	29	39	22	20	42	7	88	97
b1790	Chromosome	1874755	1875576	-	822	34	32	22	29	264	244	65	85
b1791	Chromosome	1875673	1876854	+	1182	49	45	46	43	166	157	37	61
b1792	Chromosome	1876909	1877256	+	348	56	58	41	43	1250	510	1937	617
b1793	Chromosome	1877278	1877532	-	255	57	52	41	46	286	280	209	201
b1794	Chromosome	1877715	1878740	+	1026	108	148	76	105	280	267	416	412
b4676	Chromosome	1878773	1878871	+	99	2	5	12	9	1	2	10	6
b4675	Chromosome	1878874	1878948	+	75	2	5	5	2	0	4	6	6
b1795	Chromosome	1879007	1879255	-	249	60	64	37	30	186	141	348	336
b1796	Chromosome	1879403	1879585	-	183	6	5	2	7	4	6	4	6
b1797	Chromosome	1879589	1879948	-	360	10	6	7	10	4	25	7	75
b1798	Chromosome	1880121	1880759	-	639	34	35	36	36	132	181	101	167
b1799	Chromosome	1880886	1881809	-	924	93	111	69	68	492	526	424	492
b1800	Chromosome	1881912	1882997	+	1086	139	124	84	75	729	731	620	640
b1801	Chromosome	1883188	1884633	+	1446	72	82	55	59	48	86	116	106
b1802	Chromosome	1884665	1885789	+	1125	36	52	27	35	247	242	122	117
b1803	Chromosome	1885845	1886810	+	966	31	44	14	47	21	30	31	54
b1804	Chromosome	1886864	1887991	-	1128	74	69	66	66	118	133	313	324
b1805	Chromosome	1888061	1889746	-	1686	116	150	78	123	356	280	257	247
b1806	Chromosome	1889951	1890532	-	582	43	47	26	32	135	104	310	286
b1807	Chromosome	1890572	1891267	-	696	101	166	64	93	755	705	299	289
b1808	Chromosome	1891325	1893235	-	1911	132	134	91	99	538	557	569	577
b1809	Chromosome	1893367	1893711	+	345	108	125	95	98	1057	959	1030	1003
b1810	Chromosome	1894133	1894432	+	300	30	33	25	28	215	617	436	1152
b1811	Chromosome	1894552	1894731	-	180	13	15	9	13	90	75	66	27
b1812	Chromosome	1894805	1896166	+	1362	78	79	40	59	749	288	1011	145
b1813	Chromosome	1896170	1896748	+	579	55	72	41	34	85	65	260	269
b1814	Chromosome	1896932	1898296	+	1365	276	288	260	263	1476	1401	2786	2678
b1815	Chromosome	1898427	1900025	+	1599	89	99	40	63	116	81	371	408
b1816	Chromosome	1900029	1901585	-	1557	283	276	240	276	2091	2108	2850	2779
b1817	Chromosome	1902048	1903019	+	972	3965	3827	3317	3289	30201	32912	44326	47917
b1818	Chromosome	1903082	1903882	+	801	2602	2621	2353	2368	23495	21724	37688	35568
b1819	Chromosome	1903895	1904746	+	852	2681	2724	2204	2222	22269	20090	32927	30035
b1820	Chromosome	1904801	1905259	+	459	29	33	35	39	119	126	573	514
b1821	Chromosome	1905688	1906254	+	567	36	43	26	37	16	20	30	40
b1822	Chromosome	1906251	1907060	-	810	41	44	28	16	98	50	180	108
b1823	Chromosome	1907226	1907435	-	210	1592	2073	1281	1465	17338	7365	22518	10062
b1824	Chromosome	1907448	1907591	-	144	8805	8435	6552	6381	51743	58349	70274	80204
b1825	Chromosome	1908261	1908548	-	288	19	12	12	8	27	9	91	91
b1826	Chromosome	1908623	1908766	-	144	21	22	17	23	46	40	12	23
b4536	Chromosome	1908925	1909164	+	240	14	10	10	10	46	60	12	5
b1827	Chromosome	1909308	1910099	-	792	127	130	104	115	1045	968	956	900
b1828	Chromosome	1910276	1911649	+	1374	90	79	52	49	153	78	125	116
b1829	Chromosome	1911695	1912576	-	882	178	169	107	127	1518	1514	1632	1637
b1830	Chromosome	1912768	1914816	-	2049	373	363	267	276	1882	1709	3266	3183
b1831	Chromosome	1914836	1915534	-	699	256	258	261	250	2304	2327	2920	2895
b1832	Chromosome	1915631	1916128	-	498	99	95	75	71	825	848	615	571
b1833	Chromosome	1916258	1917541	+	1284	64	61	51	45	174	200	187	206
b1834	Chromosome	1917510	1920143	+	2634	157	187	124	138	435	442	832	835
b1835	Chromosome	1920223	1921662	+	1440	79	100	57	51	326	400	501	543
b1836	Chromosome	1921780	1922016	+	237	53	46	18	18	188	176	333	236
b1837	Chromosome	1922121	1922312	+	192	16	16	12	4	108	145	24	55
b1838	Chromosome	1922313	1922969	-	657	35	37	17	20	48	37	15	36
b4432	Chromosome	1923066	1923314	+	249	4	5	7	13	1	2	28	63
b4433	Chromosome	1923164	1923284	-	121	0	0	0	0	0	0	0	0
b1839	Chromosome	1923365	1923706	-	342	28	37	30	27	365	347	264	311
b1840	Chromosome	1923719	1924591	-	873	112	111	65	87	206	319	465	541
b1841	Chromosome	1924595	1924969	-	375	47	53	57	57	255	315	490	477
b1842	Chromosome	1925108	1925338	+	231	24	44	21	24	85	77	15	10
b1843	Chromosome	1925440	1926096	+	657	35	42	26	27	148	167	130	205
b1844	Chromosome	1926120	1926782	+	663	44	49	16	28	62	62	321	331
b1845	Chromosome	1926779	1928839	-	2061	130	137	104	117	536	420	943	907
b1846	Chromosome	1929048	1929707	-	660	78	83	56	57	262	245	421	364
b1847	Chromosome	1930034	1930390	-	357	56	54	52	58	462	379	219	245
b1848	Chromosome	1930457	1930747	-	291	68	69	33	34	569	564	824	805
b1849	Chromosome	1930881	1932059	+	1179	70	76	58	60	206	234	402	427
b1850	Chromosome	1932115	1932756	-	642	344	349	248	264	1937	1689	3396	3155
b1851	Chromosome	1932793	1934604	-	1812	602	620	433	439	3154	3389	4949	4962
b1852	Chromosome	1934839	1936314	-	1476	418	418	366	358	3130	3036	4776	4683
b1853	Chromosome	1936652	1937521	+	870	236	227	199	203	8120	1118	14553	1421
b1854	Chromosome	1937649	1939091	+	1443	2604	2457	1987	1806	17434	16573	25623	24872
b1855	Chromosome	1939222	1940193	-	972	77	98	54	71	825	829	568	616
b1856	Chromosome	1940313	1941635	-	1323	181	206	99	132	1170	1036	981	891
b1857	Chromosome	1941651	1942583	-	933	124	121	67	64	292	458	677	949
b1858	Chromosome	1942662	1943417	+	756	58	47	47	54	298	300	340	350
b1859	Chromosome	1943414	1944199	+	786	61	66	50	55	315	291	384	357
b1860	Chromosome	1944346	1945356	-	1011	89	72	77	74	708	741	901	942
b1861	Chromosome	1945365	1945976	-	612	91	96	80	88	600	662	596	684
b4677	Chromosome	1946115	1946180	-	66	13	8	6	7	17	14	8	9
b1862	Chromosome	1946251	1946853	+	603	28	25	23	21	23	14	94	105
b1863	Chromosome	1946855	1947376	-	522	63	66	70	66	585	478	864	843
b1864	Chromosome	1947411	1948151	-	741	561	620	477	525	4772	4526	6796	6473
b1865	Chromosome	1948180	1948632	-	453	102	102	90	97	520	504	1453	1321
b1866	Chromosome	1948750	1950522	-	1773	1125	1119	753	779	7756	7661	11435	11308
b1867	Chromosome	1950832	1951398	+	567	110	116	47	48	391	420	620	641
b1868	Chromosome	1951395	1952213	+	819	45	46	44	40	527	395	291	208
b1869	Chromosome	1952266	1952661	+	396	50	58	29	37	639	603	537	680
b1870	Chromosome	1952702	1953445	+	744	70	60	49	64	234	273	620	465
b1871	Chromosome	1953442	1954413	+	972	58	64	53	51	498	470	478	467
b1872	Chromosome	1954578	1957007	-	2430	90	127	82	93	1350	296	2601	523
b1873	Chromosome	1957032	1958132	-	1101	47	62	36	37	1956	130	3574	229
b1874	Chromosome	1958520	1959266	-	747	82	80	47	44	61	46	344	369
b1875	Chromosome	1959280	1959846	-	567	55	47	38	32	186	190	317	299
b1876	Chromosome	1960062	1961795	+	1734	277	261	160	186	1141	1149	1412	1422
b1877	Chromosome	1961972	1962460	+	489	18	29	12	17	114	374	107	750
b1878	Chromosome	1962580	1962972	-	393	16	18	8	14	43	17	12	8
b1879	Chromosome	1962972	1965050	-	2079	122	454	105	359	206	232	289	284
b1880	Chromosome	1965043	1966191	-	1149	80	85	61	56	44	47	114	110
b1881	Chromosome	1966393	1967037	-	645	35	46	27	21	21	44	90	125
b1882	Chromosome	1967048	1967437	-	390	26	26	22	21	73	74	12	19
b1883	Chromosome	1967452	1968501	-	1050	35	60	28	34	23	26	62	49
b1884	Chromosome	1968504	1969364	-	861	30	37	18	17	22	25	26	34
b1885	Chromosome	1969383	1970984	-	1602	63	74	37	57	75	81	184	172
b1886	Chromosome	1971030	1972691	-	1662	96	98	93	89	333	448	169	419
b1887	Chromosome	1972836	1973339	-	504	16	32	25	25	71	93	141	141
b1888	Chromosome	1973360	1975324	-	1965	95	101	73	78	69	34	352	355
b1889	Chromosome	1975329	1976255	-	927	37	35	28	40	36	24	129	114
b1890	Chromosome	1976252	1977139	-	888	37	39	20	19	24	77	97	98
b1891	Chromosome	1977266	1977844	-	579	46	55	31	41	137	130	71	76
b1892	Chromosome	1977847	1978197	-	351	7	22	28	26	244	145	259	274
b1893	Chromosome	1978518	1979021	-	504	6	13	9	8	20	19	21	20
b1894	Chromosome	1978940	1979215	-	276	3	3	1	4	9	18	1	2
b1895	Chromosome	1979753	1980181	+	429	84	84	71	78	1056	1092	678	658
b1896	Chromosome	1980188	1981612	-	1425	215	241	201	196	1222	1129	2667	2666
b1897	Chromosome	1981587	1982387	-	801	143	154	104	134	811	839	606	605
b4460	Chromosome	1982554	1983540	-	987	83	93	82	97	403	384	759	670
b1900	Chromosome	1983555	1985069	-	1515	154	139	96	92	466	502	573	649
b1901	Chromosome	1985139	1986128	-	990	148	133	124	122	1370	1326	1013	1043
b1902	Chromosome	1986925	1987428	+	504	85	95	112	106	664	608	802	775
b4537	Chromosome	1987507	1987758	-	252	17	16	18	26	78	89	10	8
b4663	Chromosome	1987873	1987959	-	87	1	4	0	2	5	3	2	3
b1904	Chromosome	1988222	1988545	+	324	12	22	14	12	33	38	51	126
b1905	Chromosome	1988716	1989213	+	498	838	845	612	605	7739	7424	11355	11209
b1906	Chromosome	1989251	1989490	-	240	29	30	18	14	194	180	311	284
b1907	Chromosome	1989681	1990892	+	1212	55	73	45	68	421	294	410	195
b1908	Chromosome	1990954	1991619	-	666	209	217	179	190	1199	1208	1689	1685
b1909	Chromosome	1991815	1991901	-	87	15	31	10	7	55	34	71	38
b1910	Chromosome	1991914	1991987	-	74	98	181	110	142	912	428	1853	1152
b1911	Chromosome	1992042	1992117	-	76	120	150	105	111	486	221	1134	589
b1912	Chromosome	1992269	1992817	-	549	95	114	45	58	440	451	478	508
b1913	Chromosome	1992874	1994706	-	1833	311	265	239	214	1026	939	1815	1813
b1914	Chromosome	1994703	1995359	-	657	127	123	60	60	516	533	726	745
b1915	Chromosome	1995818	1996042	+	225	30	16	13	13	83	37	114	107
b1916	Chromosome	1996110	1996832	-	723	42	48	24	42	87	35	340	244
b1917	Chromosome	1997062	1997814	-	753	50	48	44	45	577	410	623	503
b1918	Chromosome	1997811	1998479	-	669	47	56	62	69	375	387	523	520
b1919	Chromosome	1998494	1999480	-	987	172	162	100	116	434	479	1199	1219
b1920	Chromosome	1999585	2000385	-	801	567	556	434	439	3323	3172	5352	5270
b1921	Chromosome	2000473	2001024	-	552	39	46	19	36	75	59	177	142
b1922	Chromosome	2001070	2001789	-	720	149	44	106	38	172	161	21	20
b1923	Chromosome	2002110	2003606	-	1497	253	240	172	168	1574	1557	1841	1862
b1924	Chromosome	2003872	2005278	+	1407	133	190	87	138	46	108	74	54
b1925	Chromosome	2005303	2005713	+	411	13	10	18	17	6	35	16	28
b1926	Chromosome	2005713	2006078	+	366	60	38	39	40	47	70	67	170
b1927	Chromosome	2006156	2007643	+	1488	173	236	110	153	692	582	982	917
b1928	Chromosome	2007677	2008090	-	414	18	22	20	16	161	185	218	233
b1929	Chromosome	2008277	2009482	+	1206	565	535	417	433	3758	3394	6096	6132
b1930	Chromosome	2009479	2009712	+	234	90	89	89	86	870	835	1812	1513
b1931	Chromosome	2009821	2010489	+	669	38	46	29	28	71	71	153	153
b1932	Chromosome	2010600	2011079	+	480	14	22	10	20	8	14	111	111
b1936	Chromosome	2012502	2012663	+	162	12	5	5	1	4	11	56	70
b1937	Chromosome	2012700	2013014	-	315	13	16	14	12	2	14	6	23
b1938	Chromosome	2013229	2014887	+	1659	96	109	58	71	129	135	337	367
b1939	Chromosome	2014880	2015875	+	996	62	63	47	71	195	198	200	245
b1940	Chromosome	2015868	2016554	+	687	55	53	33	20	22	17	292	292
b1941	Chromosome	2016554	2017927	+	1374	81	86	45	74	47	50	104	67
b1942	Chromosome	2017946	2018389	+	444	19	25	16	18	60	108	202	281
b1943	Chromosome	2018386	2019513	+	1128	46	62	49	74	146	221	262	400
b1944	Chromosome	2019618	2020082	+	465	16	23	16	25	53	114	44	55
b1945	Chromosome	2020087	2021091	+	1005	38	54	31	40	298	235	91	94
b1946	Chromosome	2021088	2021501	+	414	26	23	17	24	70	85	68	107
b1947	Chromosome	2021504	2021869	+	366	19	22	11	12	58	41	109	109
b1948	Chromosome	2021869	2022606	+	738	23	47	22	41	37	48	87	76
b1949	Chromosome	2022616	2022885	+	270	5	8	11	5	48	47	4	6
b1950	Chromosome	2022893	2023678	+	786	31	38	30	37	17	77	106	246
b1951	Chromosome	2023968	2024591	+	624	27	27	30	16	77	78	32	22
b1952	Chromosome	2024635	2024823	-	189	32	40	17	28	10	4	14	29
b1953	Chromosome	2024986	2025213	+	228	31	24	8	10	190	228	11	7
b1954	Chromosome	2025227	2025313	-	87	4	10	8	8	75	50	6	6
b1955	Chromosome	2025511	2026326	+	816	44	53	33	55	108	97	138	158
b1956	Chromosome	2026323	2028017	-	1695	99	140	67	94	348	444	433	482
b1957	Chromosome	2028188	2028370	-	183	34	45	35	36	48	49	110	108
b1958	Chromosome	2028449	2029366	-	918	116	149	87	70	301	273	596	546
b1959	Chromosome	2029539	2030459	+	921	42	46	26	18	31	14	46	17
b1960	Chromosome	2030448	2030918	-	471	32	39	39	33	85	76	181	170
b1961	Chromosome	2030899	2032317	-	1419	154	171	135	124	401	441	953	1023
b1962	Chromosome	2032384	2033079	-	696	37	55	18	33	118	124	227	207
b1963	Chromosome	2033119	2033484	-	366	26	13	25	21	25	20	42	45
b4603	Chromosome	2033649	2033739	+	91	4	13	7	8	6	5	5	11
b1967	Chromosome	2035835	2036686	+	852	226	215	196	186	2700	2616	1887	1842
b1968	Chromosome	2036794	2038152	-	1359	66	77	57	45	112	127	115	100
b1969	Chromosome	2038152	2038823	-	672	33	30	41	43	117	122	148	193
b1970	Chromosome	2038956	2039369	+	414	23	31	7	11	54	21	24	30
b1971	Chromosome	2039478	2040482	+	1005	60	88	62	63	222	233	324	335
b1972	Chromosome	2040483	2041118	+	636	23	23	15	19	41	46	123	122
b1973	Chromosome	2041375	2042025	+	651	49	63	50	51	221	202	299	292
b1974	Chromosome	2042368	2042898	+	531	42	28	23	28	27	29	21	41
b1975	Chromosome	2043468	2043557	-	90	94	71	56	63	479	541	480	478
b1976	Chromosome	2043651	2044448	+	798	171	164	177	187	1180	976	1781	1625
b1977	Chromosome	2044549	2044624	+	76	3	8	6	9	60	21	106	53
b1978	Chromosome	2044938	2052014	+	7077	475	456	302	315	505	592	898	997
[truncated: 2,499 more rows]

## Sheet: CC rRNA and mRNA reads
						PETRI-seq						RiboD-PETRI								Non-rRNA ratio
Geneid	Chr	Start	End	Strand	Length	0225-1.r1	0225-1.r2	0225-2.r1	0225-2.r2	0225-3.r1	0225-3.r2	0225-4.r1	0225-4.r2	0225-5.r1	0225-5.r2	0225-6.r1	0225-6.r2			C. crescentus Ctrl	C. crescentus ΔΔ
CCNA_R0094	NC_011916.1	1	182	-	182	2	1	0	4	0	9	68	171	0	2	2	2			0.039	0.55
CCNA_00001	NC_011916.1	202	1107	+	906	6	16	1	7	23	33	10	175	7	41	0	17			0.0391	0.5766
CCNA_00002	NC_011916.1	1104	1703	+	600	3	5	26	50	6	6	98	126	0	2	38	83			0.0383	0.5012
CCNA_00003	NC_011916.1	1700	2557	+	858	0	8	17	33	12	29	72	126	53	65	12	85
CCNA_00004	NC_011916.1	2559	3158	+	600	4	13	8	23	17	35	141	155	0	1	6	5
CCNA_00005	NC_011916.1	3190	3903	+	714	61	47	14	38	13	39	81	87	144	175	2	5
CCNA_00006	NC_011916.1	4022	4810	+	789	17	10	23	67	16	15	1	4	0	1	40	201
CCNA_R0095	NC_011916.1	4292	4950	-	659	7	33	19	38	7	23	115	99	3	78	256	729
CCNA_00007	NC_011916.1	4960	5235	+	276	78	133	38	87	80	141	216	332	91	169	336	515
CCNA_00008	NC_011916.1	5636	7108	+	1473	117	221	136	238	169	292	771	1276	597	853	673	2005
CCNA_00009	NC_011916.1	7170	7790	-	621	1	14	0	5	11	24	1	3	0	6	1	2
CCNA_00010	NC_011916.1	8165	10060	+	1896	245	505	284	770	332	599	1192	2612	700	1472	2825	4659
CCNA_00011	NC_011916.1	10223	11380	+	1158	55	101	109	129	37	89	264	286	144	289	318	514
CCNA_00012	NC_011916.1	11467	14178	+	2712	36	111	50	122	41	74	168	323	92	187	547	698
CCNA_R0096	NC_011916.1	13417	13499	+	83	0	0	0	0	0	0	0	0	0	0	0	0
CCNA_00013	NC_011916.1	14199	17021	+	2823	53	128	49	143	29	90	176	357	5	58	184	311
CCNA_00014	NC_011916.1	17018	17494	-	477	0	3	47	55	10	65	0	4	0	5	1	8
CCNA_00015	NC_011916.1	17491	18042	-	552	0	5	1	6	9	17	31	205	2	4	3	9
CCNA_00016	NC_011916.1	18043	18495	-	453	0	2	2	1	7	16	54	155	0	4	21	9
CCNA_00017	NC_011916.1	18492	18731	-	240	0	0	0	0	0	0	0	1	26	68	0	1
CCNA_00018	NC_011916.1	18735	19784	-	1050	14	21	19	27	12	51	22	107	24	225	3	9
CCNA_00019	NC_011916.1	19815	20447	+	633	3	11	1	6	20	15	2	10	1	7	52	226
CCNA_00020	NC_011916.1	20444	20668	-	225	1	18	9	12	9	16	81	152	14	49	348	371
CCNA_03911	NC_011916.1	20665	20778	-	114	1	9	10	19	0	2	20	39	0	2	346	556
CCNA_00021	NC_011916.1	20840	23032	-	2193	32	22	12	37	18	53	9	30	13	19	9	29
CCNA_00022	NC_011916.1	23029	23559	-	531	1	4	6	7	2	11	255	331	0	1	123	216
CCNA_00023	NC_011916.1	23742	24074	+	333	0	1	0	3	6	12	1	4	1	2	2	5
CCNA_00024	NC_011916.1	24091	24981	+	891	2	7	3	4	5	6	111	162	0	4	6	48
CCNA_00025	NC_011916.1	24991	26643	-	1653	35	48	95	102	68	92	156	193	2	14	188	349
CCNA_00026	NC_011916.1	26701	29403	-	2703	43	91	47	85	31	41	47	198	10	43	9	42
CCNA_00027	NC_011916.1	29502	30191	-	690	5	15	31	43	4	17	0	7	12	98	369	295
CCNA_R0097	NC_011916.1	30271	30354	-	84	0	0	1	3	1	3	0	1	0	0	2	1
CCNA_00028	NC_011916.1	30337	32658	-	2322	52	81	84	150	91	184	340	398	97	283	513	622
CCNA_00029	NC_011916.1	32914	33546	+	633	6	47	9	15	3	19	10	155	70	70	3	13
CCNA_00030	NC_011916.1	33595	34329	+	735	19	44	28	62	2	13	2	7	1	3	5	17
CCNA_00031	NC_011916.1	34312	34698	-	387	7	2	6	2	1	1	1	0	0	2	1	5
CCNA_00032	NC_011916.1	34699	34941	-	243	12	34	0	3	3	6	113	153	2	71	0	2
CCNA_03912	NC_011916.1	35047	35667	-	621	9	7	7	2	8	16	1	1	1	2	4	2
CCNA_00033	NC_011916.1	35824	37962	-	2139	525	1068	833	1599	618	1206	4421	8618	1748	3238	5231	9259
CCNA_00034	NC_011916.1	38211	38480	-	270	247	403	356	582	253	397	1802	3098	491	855	2724	3930
CCNA_00035	NC_011916.1	38495	39427	-	933	168	306	311	423	210	380	1265	2455	482	973	2771	5819
CCNA_00036	NC_011916.1	39430	39879	-	450	30	35	1	3	11	22	19	129	0	1	3	3
CCNA_00037	NC_011916.1	39980	40768	-	789	2	4	10	39	22	28	31	91	1	0	111	370
CCNA_00038	NC_011916.1	40828	41403	-	576	39	72	0	8	9	17	14	84	1	3	0	4
CCNA_00039	NC_011916.1	41403	41921	-	519	40	50	34	52	21	21	2	3	0	0	0	7
CCNA_00040	NC_011916.1	41960	42511	-	552	9	23	0	8	18	28	109	209	1	2	9	173
CCNA_00041	NC_011916.1	42585	45614	-	3030	294	612	306	635	375	805	1691	3494	454	1380	2853	5489
CCNA_R0098	NC_011916.1	45805	46002	-	198	0	1	3	19	0	0	0	0	0	2	384	456
CCNA_00042	NC_011916.1	45893	46543	-	651	21	55	49	78	18	63	79	255	0	3	136	209
CCNA_00043	NC_011916.1	46622	48268	-	1647	224	405	129	287	154	315	617	1767	156	478	1204	1516
CCNA_00044	NC_011916.1	48271	48846	-	576	14	55	9	42	15	57	229	379	49	117	2	4
CCNA_00045	NC_011916.1	49105	49638	+	534	50	128	36	177	50	124	441	660	125	188	460	1016
CCNA_00046	NC_011916.1	49645	50031	-	387	0	3	23	26	19	33	52	171	6	73	78	235
CCNA_00047	NC_011916.1	50132	50812	-	681	38	42	16	29	16	49	0	3	2	16	6	5
CCNA_00048	NC_011916.1	50902	52125	-	1224	64	154	107	150	55	122	170	273	285	507	431	652
CCNA_00049	NC_011916.1	52245	52679	-	435	4	18	2	2	7	7	1	3	0	1	11	13
CCNA_00050	NC_011916.1	52707	54299	-	1593	48	109	68	147	44	109	378	464	26	29	3	21
CCNA_00051	NC_011916.1	54296	55222	-	927	34	52	44	105	35	45	176	403	9	9	6	11
CCNA_00052	NC_011916.1	55231	55686	-	456	10	18	62	79	8	16	0	1	0	4	319	313
CCNA_00053	NC_011916.1	55724	56668	-	945	17	63	67	86	17	49	125	145	20	89	6	11
CCNA_00054	NC_011916.1	56665	58011	-	1347	36	68	48	56	31	61	19	81	23	31	205	350
CCNA_00055	NC_011916.1	58201	58608	-	408	37	72	33	125	11	61	120	334	10	82	349	1003
CCNA_00056	NC_011916.1	58654	59106	-	453	6	23	0	6	1	8	90	133	0	1	2	4
CCNA_00057	NC_011916.1	59115	59750	-	636	61	74	19	25	15	30	6	18	3	3	2	6
CCNA_00058	NC_011916.1	59754	60386	-	633	5	4	5	31	7	36	2	12	1	4	3	9
CCNA_00059	NC_011916.1	60534	61121	-	588	14	27	4	3	14	23	90	99	0	1	2	8
CCNA_00060	NC_011916.1	61191	61763	-	573	32	163	25	152	19	120	77	255	76	116	295	800
CCNA_00061	NC_011916.1	61885	63153	+	1269	18	41	46	81	3	3	3	8	4	2	14	16
CCNA_00062	NC_011916.1	63327	64361	-	1035	12	39	50	97	26	68	25	112	35	125	386	454
CCNA_03913	NC_011916.1	64440	64487	-	48	1	0	1	0	0	1	2	0	0	1	0	0
CCNA_00063	NC_011916.1	64529	66091	-	1563	41	81	55	94	40	91	63	242	36	73	8	156
CCNA_00064	NC_011916.1	66331	68127	-	1797	2	28	22	49	7	22	2	10	58	102	28	43
CCNA_03914	NC_011916.1	68179	68196	-	18	0	0	0	0	0	0	0	0	0	0	0	1
CCNA_00065	NC_011916.1	68289	69062	-	774	5	18	3	8	3	13	11	110	41	58	1	10
CCNA_00066	NC_011916.1	69120	69488	-	369	6	37	12	9	1	6	24	70	71	96	0	8
CCNA_00067	NC_011916.1	69493	69774	-	282	11	14	7	8	12	32	7	6	0	2	17	8
CCNA_00068	NC_011916.1	69794	70804	-	1011	29	34	34	61	16	51	77	215	9	96	342	367
CCNA_00069	NC_011916.1	70801	71904	-	1104	5	18	5	18	19	56	5	13	1	8	220	449
CCNA_00070	NC_011916.1	71977	72945	+	969	9	21	3	39	6	6	7	59	1	6	47	124
CCNA_00071	NC_011916.1	72950	73636	+	687	6	10	8	12	6	9	3	7	0	2	4	8
CCNA_00072	NC_011916.1	73680	74576	+	897	8	27	9	8	27	23	13	261	0	5	3	18
CCNA_00073	NC_011916.1	74573	76108	+	1536	11	43	18	48	47	82	151	330	19	79	167	350
CCNA_R0001	NC_011916.1	76150	76225	+	76	16	24	5	2	6	20	0	1	11	24	59	51
CCNA_00074	NC_011916.1	76477	78678	-	2202	121	216	91	186	109	157	479	960	268	509	863	1076
CCNA_00075	NC_011916.1	78703	79908	-	1206	23	46	7	62	57	121	248	484	23	63	99	188
CCNA_00076	NC_011916.1	79975	80358	-	384	3	3	3	26	2	11	1	4	1	3	194	237
CCNA_00077	NC_011916.1	80355	81530	-	1176	8	27	14	27	23	19	5	90	14	16	916	1120
CCNA_00078	NC_011916.1	81533	83326	-	1794	93	136	69	123	75	127	283	483	105	252	876	1551
CCNA_00079	NC_011916.1	83414	83893	-	480	1	21	5	9	3	7	3	156	0	66	16	277
CCNA_00080	NC_011916.1	84087	84728	+	642	13	27	31	90	6	35	77	87	0	10	29	260
CCNA_00081	NC_011916.1	84763	84972	-	210	7	17	21	68	10	8	35	71	24	78	1	14
CCNA_00082	NC_011916.1	85222	86880	-	1659	94	133	42	89	37	84	376	622	34	135	951	1388
CCNA_00083	NC_011916.1	87043	88683	-	1641	6	56	24	35	11	35	191	411	51	157	853	948
CCNA_00084	NC_011916.1	89053	90642	+	1590	52	58	10	60	33	41	115	377	3	10	225	415
CCNA_00085	NC_011916.1	90655	91413	+	759	6	7	22	46	27	67	3	4	5	77	3	8
CCNA_00086	NC_011916.1	91467	96290	-	4824	292	527	272	618	334	561	1386	2591	692	1256	2325	4233
CCNA_R0002	NC_011916.1	96456	96584	-	129	0	2	2	3	0	0	0	0	0	0	1	3
CCNA_00087	NC_011916.1	96628	97737	-	1110	6	58	64	160	22	32	247	423	2	3	2	11
CCNA_00088	NC_011916.1	97841	99385	+	1545	10	56	19	37	5	37	87	157	2	49	5	15
CCNA_00089	NC_011916.1	99466	101895	-	2430	28	97	31	124	94	126	32	236	2	15	561	777
CCNA_00090	NC_011916.1	101960	102943	-	984	19	19	6	17	8	24	2	9	5	11	37	129
CCNA_00091	NC_011916.1	103149	104042	-	894	8	21	17	37	6	19	2	7	0	4	276	271
CCNA_00092	NC_011916.1	104039	104929	-	891	8	5	4	10	30	58	36	46	34	42	3	6
CCNA_00093	NC_011916.1	105028	105237	-	210	0	1	1	0	1	1	0	2	1	0	1	2
CCNA_00094	NC_011916.1	105310	106230	-	921	5	4	2	3	11	12	5	5	2	4	6	17
CCNA_00095	NC_011916.1	106334	107332	-	999	19	20	22	55	9	15	31	98	1	5	2	15
CCNA_00096	NC_011916.1	107402	108280	+	879	29	25	8	11	24	25	67	73	5	8	16	24
CCNA_00097	NC_011916.1	108334	108792	+	459	0	0	4	4	5	5	2	6	8	6	126	55
CCNA_00098	NC_011916.1	108943	109233	-	291	14	13	1	16	8	16	0	1	0	3	3	2
CCNA_00099	NC_011916.1	109239	110969	-	1731	28	40	4	18	8	40	180	246	98	214	10	40
CCNA_00100	NC_011916.1	110979	111638	-	660	14	50	13	11	11	26	15	82	3	6	350	571
CCNA_00101	NC_011916.1	111745	113034	-	1290	3	27	13	22	17	42	158	257	9	67	8	21
CCNA_00102	NC_011916.1	113151	113375	+	225	21	30	39	53	6	18	12	9	2	1	12	14
CCNA_00103	NC_011916.1	113463	115160	+	1698	19	33	53	76	5	31	227	394	94	176	45	50
CCNA_00104	NC_011916.1	115289	115990	-	702	3	18	3	6	6	42	1	13	62	110	5	10
CCNA_00105	NC_011916.1	116088	116786	+	699	16	45	17	32	2	36	0	11	2	1	5	11
CCNA_00106	NC_011916.1	116834	118099	+	1266	10	21	17	45	13	26	159	248	59	132	332	323
CCNA_00107	NC_011916.1	118260	118457	-	198	20	17	6	22	3	0	1	1	9	14	2	2
CCNA_00108	NC_011916.1	118467	119144	-	678	17	14	10	13	24	46	51	133	15	34	2	5
CCNA_00109	NC_011916.1	119160	120059	-	900	16	36	15	39	19	92	0	7	37	167	72	129
CCNA_00110	NC_011916.1	120169	120675	-	507	3	13	34	70	1	2	1	4	35	91	1	3
CCNA_00111	NC_011916.1	120752	121498	+	747	20	28	3	27	6	23	74	290	49	119	18	46
CCNA_00112	NC_011916.1	121503	121892	+	390	4	13	3	11	1	24	0	6	0	1	278	335
CCNA_00113	NC_011916.1	121972	122544	+	573	6	14	13	18	4	14	3	8	0	6	1	10
CCNA_00114	NC_011916.1	122547	122852	+	306	17	22	69	93	2	0	0	3	172	174	32	52
CCNA_00115	NC_011916.1	122939	126268	+	3330	30	75	191	274	55	106	24	134	51	124	675	1077
CCNA_R0099	NC_011916.1	124027	124282	-	256	0	0	0	0	0	0	0	0	0	0	0	0
CCNA_00116	NC_011916.1	126407	127753	-	1347	31	51	13	105	40	92	149	235	88	122	13	358
CCNA_00117	NC_011916.1	127915	129735	+	1821	51	79	8	41	20	55	109	202	0	9	130	342
CCNA_00118	NC_011916.1	129746	131989	+	2244	15	23	42	111	16	29	63	96	0	10	8	22
CCNA_00119	NC_011916.1	131977	132438	+	462	0	2	1	6	1	3	0	6	0	2	2	5
CCNA_00120	NC_011916.1	132435	132953	+	519	2	3	12	43	6	18	1	4	1	2	3	28
CCNA_00121	NC_011916.1	132950	133408	-	459	0	2	34	51	8	24	4	9	2	80	306	330
CCNA_00122	NC_011916.1	133417	133827	-	411	37	40	9	18	8	14	93	87	2	1	127	100
CCNA_00123	NC_011916.1	133900	134682	+	783	22	50	51	115	20	56	192	390	113	192	2	13
CCNA_00124	NC_011916.1	134826	135413	-	588	16	51	22	30	14	35	38	273	39	151	796	1515
CCNA_00125	NC_011916.1	135509	136177	-	669	30	93	13	37	39	84	34	116	91	264	5	10
CCNA_00126	NC_011916.1	136184	136591	-	408	4	17	26	64	10	28	6	11	27	185	2	2
CCNA_00127	NC_011916.1	136811	137011	+	201	0	0	23	21	0	0	1	0	0	0	2	0
CCNA_00128	NC_011916.1	137246	138472	-	1227	43	144	47	69	42	52	9	197	72	247	2	8
CCNA_00129	NC_011916.1	138555	138917	-	363	1	0	2	1	3	10	10	79	1	1	1	5
CCNA_00130	NC_011916.1	138921	140918	-	1998	54	114	26	107	71	138	98	154	30	102	40	114
CCNA_00131	NC_011916.1	141119	141541	+	423	0	3	1	2	0	2	0	2	0	0	3	6
CCNA_00132	NC_011916.1	141633	142433	+	801	2	25	0	7	4	34	4	2	0	3	4	10
CCNA_00133	NC_011916.1	142680	143894	+	1215	40	87	48	54	14	22	83	222	252	367	467	686
CCNA_00134	NC_011916.1	143989	144417	+	429	50	79	6	48	66	76	146	218	2	4	24	109
CCNA_00135	NC_011916.1	144443	145276	+	834	12	37	7	32	25	30	90	132	3	7	419	308
CCNA_00136	NC_011916.1	145273	146952	-	1680	18	55	18	40	26	60	178	309	3	13	282	663
CCNA_00137	NC_011916.1	146986	148530	-	1545	22	34	34	66	7	10	3	35	38	85	8	33
CCNA_00138	NC_011916.1	148752	150944	+	2193	29	62	30	108	44	87	126	260	21	259	174	462
CCNA_00139	NC_011916.1	150993	152600	-	1608	20	46	6	8	8	15	4	8	58	111	7	31
CCNA_00140	NC_011916.1	152709	153662	-	954	23	103	87	133	22	35	7	22	46	107	17	29
CCNA_00141	NC_011916.1	153718	154533	-	816	20	28	22	15	12	6	39	119	0	4	3	19
CCNA_00142	NC_011916.1	154535	154912	-	378	0	3	5	6	3	4	45	107	0	1	5	8
CCNA_00143	NC_011916.1	154912	155784	-	873	2	6	4	6	4	17	93	120	2	8	597	441
CCNA_00144	NC_011916.1	155819	156973	-	1155	1	8	8	33	8	26	85	132	0	7	6	88
CCNA_00145	NC_011916.1	156966	157568	-	603	6	37	4	24	10	24	62	123	28	133	203	250
CCNA_00146	NC_011916.1	157593	158186	+	594	12	38	5	7	10	33	135	154	0	4	0	9
CCNA_00147	NC_011916.1	158354	158470	+	117	7	13	1	15	9	26	0	0	83	80	194	159
CCNA_00148	NC_011916.1	158546	159079	+	534	58	64	27	105	44	44	10	248	10	18	340	534
CCNA_00149	NC_011916.1	159096	159323	+	228	1	4	2	0	1	1	0	3	72	81	255	397
CCNA_00150	NC_011916.1	159320	160297	-	978	20	24	8	62	29	53	3	76	133	166	179	259
CCNA_00151	NC_011916.1	160464	161180	-	717	43	74	48	131	36	87	8	47	26	56	6	13
CCNA_00152	NC_011916.1	161320	162396	+	1077	74	114	86	144	21	75	33	127	1	7	733	938
CCNA_00153	NC_011916.1	162409	163035	+	627	48	65	26	62	55	59	4	4	40	84	194	667
CCNA_00154	NC_011916.1	162975	163235	-	261	1	2	0	31	0	3	0	3	0	2	0	2
CCNA_00155	NC_011916.1	163413	164531	+	1119	19	65	59	187	68	164	395	793	86	233	658	950
CCNA_00156	NC_011916.1	164664	164951	+	288	0	1	1	2	2	5	19	40	0	2	0	4
CCNA_00157	NC_011916.1	165022	165393	+	372	0	13	12	16	0	1	0	3	1	1	0	3
CCNA_R0100	NC_011916.1	165492	165575	+	84	0	0	5	14	0	1	1	1	0	1	0	2
CCNA_00158	NC_011916.1	165621	166784	+	1164	10	19	4	38	24	36	38	251	57	80	233	667
CCNA_00159	NC_011916.1	166781	169246	+	2466	77	201	217	377	78	150	131	596	219	432	37	428
CCNA_00160	NC_011916.1	169387	170526	+	1140	3	9	3	11	22	32	0	5	0	7	6	20
CCNA_00161	NC_011916.1	170951	171577	+	627	100	173	100	203	93	218	722	1344	292	356	1341	2341
CCNA_00162	NC_011916.1	171649	172917	+	1269	413	708	363	643	283	656	1937	3741	579	1368	2147	3925
CCNA_00163	NC_011916.1	172964	175183	+	2220	158	422	219	671	171	403	918	2194	707	1312	1621	3505
CCNA_00164	NC_011916.1	175173	177098	+	1926	24	65	41	111	78	107	532	666	80	241	52	138
CCNA_00165	NC_011916.1	177092	177745	-	654	1	5	2	2	24	31	18	100	0	1	3	4
CCNA_03915	NC_011916.1	177944	178090	+	147	0	2	13	10	0	1	0	0	0	0	2	8
CCNA_00166	NC_011916.1	178252	179070	-	819	15	12	3	11	5	7	166	221	2	4	323	272
CCNA_00167	NC_011916.1	179311	180120	+	810	28	30	5	80	11	15	2	4	2	4	195	245
CCNA_00168	NC_011916.1	180205	180801	+	597	17	24	39	64	19	53	117	233	124	308	956	1832
CCNA_00169	NC_011916.1	181379	182917	+	1539	11	60	45	70	51	70	3	20	126	143	18	15
CCNA_00170	NC_011916.1	182997	185663	+	2667	66	81	21	29	12	36	33	51	73	84	209	301
CCNA_00171	NC_011916.1	185853	186290	+	438	10	13	0	2	1	8	1	2	1	2	0	7
CCNA_00172	NC_011916.1	186287	188350	+	2064	16	55	16	20	11	34	39	195	5	12	20	203
CCNA_00173	NC_011916.1	188347	189822	+	1476	5	7	5	11	13	32	0	9	1	36	26	89
CCNA_00174	NC_011916.1	189809	191020	+	1212	0	13	4	25	9	11	1	8	3	7	8	13
CCNA_00175	NC_011916.1	191032	191484	+	453	1	2	1	2	2	2	1	1	2	3	2	0
CCNA_00176	NC_011916.1	191399	191956	+	558	1	3	1	4	0	7	2	1	1	0	0	5
CCNA_00177	NC_011916.1	191925	192308	+	384	2	1	1	0	10	11	2	3	1	1	0	2
CCNA_00178	NC_011916.1	192305	192895	+	591	0	2	1	6	3	5	1	5	1	2	2	7
CCNA_00179	NC_011916.1	192892	193866	+	975	5	7	3	7	4	11	3	6	2	5	4	9
CCNA_00180	NC_011916.1	193848	194954	+	1107	16	30	18	68	8	21	4	6	3	5	581	411
CCNA_00181	NC_011916.1	194951	195427	+	477	2	3	16	26	1	6	3	2	1	1	2	7
CCNA_00182	NC_011916.1	195424	196140	+	717	6	8	3	12	7	9	2	10	6	15	17	27
CCNA_00183	NC_011916.1	196250	197011	-	762	16	24	6	8	14	25	3	5	0	2	4	19
CCNA_00184	NC_011916.1	197070	197267	-	198	0	2	0	2	1	2	2	2	0	1	1	2
CCNA_00185	NC_011916.1	197285	199810	-	2526	15	23	17	39	22	53	6	25	89	158	63	106
CCNA_R0003	NC_011916.1	200125	200201	-	77	13	34	28	58	10	25	24	95	4	4	4	2
CCNA_00186	NC_011916.1	200286	201602	-	1317	14	8	63	84	27	56	207	230	36	135	8	26
CCNA_00187	NC_011916.1	201599	202681	-	1083	2	5	10	45	16	25	47	144	1	3	37	523
CCNA_00188	NC_011916.1	202763	203725	-	963	15	30	32	73	2	17	259	220	3	7	3	18
CCNA_00189	NC_011916.1	203869	204135	+	267	14	53	80	161	38	59	117	156	105	123	13	179
CCNA_00190	NC_011916.1	204137	204571	+	435	2	3	14	22	4	22	1	3	3	2	64	73
CCNA_00191	NC_011916.1	204697	205173	+	477	0	5	1	7	1	8	66	77	0	2	3	4
CCNA_00192	NC_011916.1	205174	206793	-	1620	8	22	22	20	18	40	3	15	1	5	15	54
CCNA_00193	NC_011916.1	206989	208041	-	1053	9	22	3	6	1	5	1	5	8	49	4	10
CCNA_00194	NC_011916.1	208043	208345	-	303	0	4	1	1	0	2	1	15	0	3	1	1
CCNA_00195	NC_011916.1	208487	209095	-	609	0	0	3	22	34	32	0	6	60	109	3	4
CCNA_00196	NC_011916.1	209092	210531	-	1440	40	63	16	85	11	34	3	12	81	179	24	355
CCNA_R0004	NC_011916.1	210637	210769	-	133	4	3	0	0	4	4	0	1	0	0	0	0
CCNA_00197	NC_011916.1	211121	211522	-	402	125	210	113	209	109	185	787	1302	243	271	749	1079
CCNA_00198	NC_011916.1	211519	212256	-	738	259	432	236	387	283	419	1097	2049	275	524	1314	2119
CCNA_00199	NC_011916.1	212387	214267	+	1881	19	59	9	40	47	55	239	290	115	193	212	517
CCNA_00200	NC_011916.1	214320	215255	-	936	77	93	67	118	58	147	89	234	143	265	292	515
CCNA_00201	NC_011916.1	215418	216098	+	681	1	5	6	9	7	15	3	7	1	2	226	257
CCNA_00202	NC_011916.1	216215	217270	+	1056	10	11	12	55	12	24	1	2	143	214	336	294
CCNA_00203	NC_011916.1	217328	218332	+	1005	10	11	26	49	5	29	6	5	0	6	1	10
CCNA_00204	NC_011916.1	218336	220237	-	1902	19	39	21	57	13	28	156	213	29	84	331	244
CCNA_00205	NC_011916.1	220241	220822	-	582	14	15	1	20	7	15	1	4	0	0	1	7
CCNA_03916	NC_011916.1	220822	221085	-	264	0	0	0	0	0	0	0	0	0	0	0	1
CCNA_00206	NC_011916.1	220931	221641	+	711	25	39	24	34	19	32	119	181	28	213	38	402
CCNA_00207	NC_011916.1	221641	222282	+	642	2	12	3	20	20	39	4	95	36	60	383	735
CCNA_00208	NC_011916.1	222283	223272	-	990	39	53	1	3	3	14	50	138	32	5	7	8
CCNA_00209	NC_011916.1	223353	224927	-	1575	8	18	27	47	50	77	8	139	0	6	70	253
CCNA_00210	NC_011916.1	225115	227526	+	2412	631	1092	617	1083	506	1036	3379	5670	1142	2183	3577	5891
CCNA_00211	NC_011916.1	227686	228693	+	1008	15	46	8	59	28	58	0	9	1	3	173	229
CCNA_00212	NC_011916.1	228693	229571	+	879	36	41	46	94	32	66	158	226	4	11	7	5
CCNA_00213	NC_011916.1	229568	230116	+	549	4	13	19	18	8	10	11	3	0	2	278	269
CCNA_00214	NC_011916.1	230262	232307	+	2046	31	84	15	27	19	27	165	313	69	194	171	454
CCNA_R0101	NC_011916.1	232420	232497	+	78	1	0	0	0	1	0	0	0	0	0	0	2
CCNA_00215	NC_011916.1	232614	233402	+	789	153	276	155	278	87	119	615	1263	503	864	696	1243
CCNA_00216	NC_011916.1	233470	233862	-	393	20	27	8	8	15	15	0	11	0	4	3	6
CCNA_00217	NC_011916.1	233977	236127	+	2151	12	44	54	69	36	79	86	329	95	153	530	727
CCNA_00218	NC_011916.1	236131	236877	-	747	0	10	4	9	14	22	2	5	0	9	0	14
CCNA_00220	NC_011916.1	237030	237635	+	606	22	47	4	7	0	3	44	67	1	0	2	5
CCNA_00221	NC_011916.1	237642	238136	-	495	11	43	15	63	1	3	0	4	3	4	111	172
CCNA_00222	NC_011916.1	238241	239860	+	1620	11	22	14	64	9	57	60	116	90	85	401	896
CCNA_00223	NC_011916.1	239869	240651	+	783	12	29	11	41	22	28	5	33	26	66	6	12
CCNA_00224	NC_011916.1	240648	242693	-	2046	44	71	68	94	62	164	188	533	276	512	328	402
CCNA_00225	NC_011916.1	243024	243056	+	33	0	0	1	0	0	0	0	1	0	0	0	0
CCNA_00226	NC_011916.1	243157	243432	+	276	0	2	0	2	0	0	0	4	0	1	0	1
CCNA_00227	NC_011916.1	243490	244056	-	567	11	30	29	37	7	38	1	4	2	2	3	7
CCNA_00228	NC_011916.1	244056	244670	-	615	24	36	2	7	5	20	23	26	0	0	122	184
CCNA_00229	NC_011916.1	244790	245764	+	975	23	29	4	38	15	27	11	128	0	6	7	6
CCNA_00230	NC_011916.1	245765	247003	-	1239	43	70	45	115	19	42	3	19	3	11	1	14
CCNA_00231	NC_011916.1	247055	247540	+	486	4	31	2	43	1	3	148	152	24	60	3	9
CCNA_00232	NC_011916.1	247537	247953	-	417	0	2	1	4	2	9	1	3	1	2	1	2
CCNA_00233	NC_011916.1	248082	249119	+	1038	22	28	4	9	7	19	16	162	78	138	144	293
CCNA_00234	NC_011916.1	249116	250276	+	1161	33	68	8	14	16	43	28	158	4	7	13	26
CCNA_00235	NC_011916.1	250273	250548	-	276	1	0	1	0	3	4	87	143	1	0	0	8
CCNA_00236	NC_011916.1	250611	252308	-	1698	47	71	24	48	17	38	135	210	1	2	16	22
CCNA_00237	NC_011916.1	252525	253232	+	708	45	99	57	95	49	108	53	112	113	223	76	262
CCNA_00238	NC_011916.1	253207	254811	+	1605	7	37	44	100	22	66	99	176	99	234	307	310
CCNA_00239	NC_011916.1	254808	255242	+	435	1	0	1	0	0	0	0	0	1	1	4	5
CCNA_00240	NC_011916.1	255318	255725	+	408	23	19	3	6	22	25	336	561	6	81	2	1
CCNA_00241	NC_011916.1	255722	256000	+	279	0	1	0	1	0	2	1	3	0	1	1	2
CCNA_03917	NC_011916.1	256240	256344	-	105	1	3	0	2	1	5	0	2	0	0	0	2
CCNA_00243	NC_011916.1	256412	256810	-	399	2	23	4	9	5	10	1	4	2	2	2	9
CCNA_00244	NC_011916.1	256953	257594	+	642	4	33	113	180	7	9	1	2	6	87	318	324
CCNA_00245	NC_011916.1	257623	257907	+	285	0	1	1	4	4	5	13	20	1	3	7	240
CCNA_00246	NC_011916.1	257952	258737	+	786	3	3	11	12	26	39	0	5	0	1	2	12
CCNA_00247	NC_011916.1	258879	259436	-	558	1	4	0	7	0	7	105	109	2	5	102	268
CCNA_00248	NC_011916.1	259514	260914	-	1401	17	49	16	56	25	36	150	315	5	24	12	31
CCNA_00249	NC_011916.1	260971	261561	+	591	2	4	8	19	8	7	1	5	0	3	1	3
CCNA_00250	NC_011916.1	261642	262904	+	1263	12	41	25	64	25	65	168	553	1	2	7	22
CCNA_00251	NC_011916.1	262953	263672	+	720	29	31	16	45	3	30	6	10	68	107	6	11
CCNA_00252	NC_011916.1	263784	265745	-	1962	61	93	31	99	28	70	92	273	40	84	162	496
CCNA_00253	NC_011916.1	265999	267027	+	1029	32	89	8	53	41	82	175	336	158	194	109	527
CCNA_00254	NC_011916.1	267164	268066	+	903	14	53	7	11	14	18	78	139	3	6	3	1
CCNA_00255	NC_011916.1	268063	269187	-	1125	12	6	18	79	0	22	15	56	5	52	106	87
CCNA_00256	NC_011916.1	269206	270057	-	852	17	45	2	7	21	26	15	22	0	2	2	9
CCNA_00257	NC_011916.1	270176	271567	-	1392	159	314	148	278	199	356	551	1352	267	775	1364	2031
CCNA_00259	NC_011916.1	271910	272620	-	711	3	1	0	10	3	13	1	4	0	1	288	516
CCNA_00260	NC_011916.1	272872	273558	-	687	1	8	3	10	7	18	1	8	7	38	152	264
CCNA_00261	NC_011916.1	273695	274738	+	1044	4	50	54	169	29	78	58	138	94	275	353	560
CCNA_00262	NC_011916.1	274921	275793	+	873	12	36	56	51	13	13	2	9	28	69	611	722
CCNA_00263	NC_011916.1	275815	276237	-	423	5	12	26	57	62	92	2	3	4	3	502	697
CCNA_00264	NC_011916.1	276384	277637	-	1254	67	76	40	77	89	145	479	573	165	256	381	558
CCNA_00265	NC_011916.1	278017	279471	+	1455	121	220	88	222	126	359	100	227	222	333	441	1283
CCNA_00266	NC_011916.1	279599	280837	-	1239	31	84	21	47	13	45	102	200	65	133	245	366
CCNA_00267	NC_011916.1	280931	281872	-	942	4	38	52	100	30	64	65	85	1	1	403	521
CCNA_R0005	NC_011916.1	281946	282042	+	97	216	415	197	425	172	429	373	907	222	590	1774	3882
CCNA_00268	NC_011916.1	282130	283956	+	1827	27	81	16	61	124	194	107	133	113	141	664	1402
CCNA_00269	NC_011916.1	284102	284431	+	330	13	29	36	57	16	43	4	26	1	46	52	207
CCNA_00270	NC_011916.1	284558	285160	+	603	14	31	27	42	17	53	2	5	6	15	8	11
CCNA_00271	NC_011916.1	285270	285422	+	153	0	14	1	2	9	17	0	0	0	0	1	1
CCNA_00272	NC_011916.1	285476	286765	+	1290	46	159	54	131	40	45	61	67	26	76	95	753
CCNA_00273	NC_011916.1	286774	287295	+	522	28	51	12	18	39	105	88	115	12	46	278	927
CCNA_00274	NC_011916.1	287636	287998	+	363	0	1	2	2	6	14	58	120	0	1	0	2
CCNA_00275	NC_011916.1	288082	289527	-	1446	18	40	16	45	22	37	7	57	4	75	20	44
CCNA_00276	NC_011916.1	289617	290096	-	480	2	8	5	5	4	8	3	9	1	2	1	10
CCNA_00277	NC_011916.1	290161	291321	+	1161	29	61	93	159	21	114	393	533	4	65	9	22
CCNA_00278	NC_011916.1	291339	292259	+	921	10	23	20	31	8	24	161	270	2	8	9	16
CCNA_00279	NC_011916.1	292311	292901	+	591	0	23	4	6	4	17	186	211	0	1	2	9
CCNA_00280	NC_011916.1	292898	293641	-	744	5	5	45	60	24	36	65	100	1	6	4	16
CCNA_00281	NC_011916.1	293641	294567	-	927	13	26	38	42	23	16	3	9	2	4	5	14
CCNA_00282	NC_011916.1	294659	294991	+	333	11	20	2	1	11	29	0	0	0	1	0	7
CCNA_00283	NC_011916.1	295109	295969	-	861	91	174	122	247	73	158	297	527	70	231	87	368
CCNA_00284	NC_011916.1	295966	296631	-	666	2	3	7	33	21	29	2	10	61	76	267	334
CCNA_00285	NC_011916.1	296628	297542	-	915	18	69	19	77	31	55	59	109	12	72	541	601
CCNA_00286	NC_011916.1	297735	298193	-	459	0	2	0	1	3	3	81	110	1	0	0	3
CCNA_00287	NC_011916.1	298212	299318	-	1107	6	20	9	52	17	42	70	165	1	4	290	317
CCNA_00288	NC_011916.1	299485	300534	-	1050	33	46	18	37	14	31	3	4	33	61	2	10
CCNA_00289	NC_011916.1	300549	300797	-	249	1	4	17	18	0	4	38	130	56	65	3	4
CCNA_00290	NC_011916.1	301048	304305	-	3258	156	275	280	516	174	438	815	1476	459	979	1632	3084
CCNA_00291	NC_011916.1	304469	305884	+	1416	15	23	11	49	26	47	100	129	3	9	3	20
CCNA_00292	NC_011916.1	306029	307462	+	1434	13	35	8	66	30	58	57	84	2	5	314	554
CCNA_00293	NC_011916.1	307455	308750	+	1296	38	49	7	21	25	43	60	144	48	107	228	323
CCNA_00294	NC_011916.1	308810	309634	+	825	28	45	57	99	29	34	137	244	1	42	5	12
CCNA_00295	NC_011916.1	309660	310352	+	693	1	5	10	41	4	15	19	40	42	96	37	414
CCNA_00296	NC_011916.1	310374	311066	+	693	2	2	2	3	8	5	0	3	3	18	10	22
CCNA_00297	NC_011916.1	311039	311896	-	858	39	104	59	128	39	82	98	163	36	99	8	129
CCNA_00298	NC_011916.1	311893	312666	-	774	16	34	7	18	1	14	1	5	0	3	4	10
CCNA_00299	NC_011916.1	312678	313961	+	1284	22	32	37	69	30	40	136	298	2	3	77	109
CCNA_00300	NC_011916.1	313978	314385	-	408	3	5	5	11	1	7	6	10	0	0	2	1
CCNA_00301	NC_011916.1	314615	315697	+	1083	12	41	4	41	12	32	0	18	1	7	107	180
CCNA_00302	NC_011916.1	315702	316991	+	1290	40	66	97	190	40	85	125	97	2	4	54	298
CCNA_00303	NC_011916.1	317027	318034	-	1008	2	4	29	36	16	28	2	5	2	5	4	16
CCNA_00304	NC_011916.1	318031	319308	-	1278	6	10	10	22	18	32	63	161	3	2	5	10
CCNA_00305	NC_011916.1	319278	320303	-	1026	19	41	63	96	20	30	0	15	0	3	86	186
CCNA_00306	NC_011916.1	320335	321048	-	714	23	27	14	37	16	44	63	168	0	2	1	8
CCNA_00307	NC_011916.1	321045	322868	-	1824	46	89	35	42	14	51	32	222	58	251	6	20
CCNA_00308	NC_011916.1	323024	323689	+	666	3	5	5	22	23	38	139	219	26	57	2	36
CCNA_R0102	NC_011916.1	323716	323778	-	63	0	0	6	19	0	0	1	0	1	0	25	30
CCNA_00309	NC_011916.1	323812	324045	-	234	1	0	38	68	16	29	24	41	0	1	0	7
CCNA_00310	NC_011916.1	324066	324845	-	780	8	16	1	6	23	27	11	28	1	2	45	290
CCNA_00311	NC_011916.1	324842	326173	-	1332	19	44	2	28	24	82	296	573	2	10	104	250
CCNA_00312	NC_011916.1	326229	326630	-	402	25	73	17	37	5	4	1	10	0	16	3	11
CCNA_00313	NC_011916.1	326715	328544	-	1830	8	22	31	24	10	45	139	322	36	132	121	124
CCNA_00314	NC_011916.1	328587	329198	-	612	3	2	7	14	14	12	1	2	1	1	6	3
CCNA_00315	NC_011916.1	329224	330753	-	1530	17	41	53	86	36	99	159	465	29	94	6	31
CCNA_00316	NC_011916.1	330777	331910	-	1134	16	53	58	108	19	35	254	383	13	14	223	427
CCNA_00317	NC_011916.1	331907	332971	-	1065	25	49	38	34	61	108	155	237	80	175	264	793
CCNA_00318	NC_011916.1	333179	334138	+	960	26	52	28	131	28	31	93	125	12	90	2	13
CCNA_00319	NC_011916.1	334224	334757	-	534	34	54	2	7	9	29	179	223	156	229	316	466
CCNA_00320	NC_011916.1	334940	335209	-	270	109	254	164	261	89	423	721	1169	413	769	943	2276
CCNA_00321	NC_011916.1	335240	335755	-	516	311	430	253	444	275	488	866	1842	154	421	1345	2297
CCNA_00322	NC_011916.1	335959	336588	+	630	6	4	19	27	2	5	4	4	45	83	20	20
CCNA_00323	NC_011916.1	336631	337728	+	1098	81	138	51	103	51	114	220	597	164	175	151	475
CCNA_00324	NC_011916.1	337932	338390	-	459	78	128	143	211	44	102	380	703	66	219	1495	2574
CCNA_00326	NC_011916.1	338634	339665	+	1032	25	34	16	22	11	48	21	208	4	9	552	696
CCNA_R0103	NC_011916.1	339708	339810	+	103	1	3	0	1	0	4	0	2	0	0	0	0
CCNA_00327	NC_011916.1	339828	340490	-	663	1	1	9	37	5	22	2	6	0	0	4	9
CCNA_00328	NC_011916.1	340575	341264	+	690	12	29	2	18	2	18	5	14	0	4	3	13
CCNA_00329	NC_011916.1	341277	341825	+	549	3	5	6	17	16	25	112	336	1	5	3	10
CCNA_00330	NC_011916.1	341832	342602	-	771	10	25	6	16	3	12	3	16	1	2	342	324
CCNA_00331	NC_011916.1	342674	343432	+	759	0	4	13	21	10	18	15	43	1	2	4	4
CCNA_00332	NC_011916.1	343435	344109	+	675	1	5	1	7	11	34	3	142	0	1	114	298
CCNA_00333	NC_011916.1	344130	344957	-	828	18	40	3	1	1	6	6	12	0	8	6	13
CCNA_00334	NC_011916.1	345020	345580	+	561	6	20	2	2	2	2	72	118	1	2	197	214
CCNA_00335	NC_011916.1	345618	346055	+	438	1	2	0	27	2	8	13	59	0	0	6	11
CCNA_00336	NC_011916.1	346066	347517	+	1452	29	33	9	17	16	27	4	16	0	7	92	130
CCNA_00337	NC_011916.1	347595	348305	+	711	3	16	3	11	12	21	16	21	58	102	3	7
CCNA_R0200	NC_011916.1	348195	348216	-	22	0	0	0	0	0	0	0	0	0	0	0	0
CCNA_00338	NC_011916.1	348479	350719	+	2241	42	76	21	76	21	58	160	252	111	143	852	1257
CCNA_00339	NC_011916.1	350788	352104	+	1317	16	24	47	80	12	34	77	147	2	4	3	21
CCNA_00340	NC_011916.1	352434	353633	+	1200	260	495	281	627	280	545	824	1590	604	1186	2816	3957
CCNA_00341	NC_011916.1	353634	354518	+	885	184	450	265	479	127	293	595	1360	357	366	1649	2875
CCNA_00342	NC_011916.1	354697	357660	+	2964	276	444	378	703	322	619	1426	2008	639	1193	3843	5947
CCNA_00343	NC_011916.1	357720	358928	+	1209	144	282	186	221	120	239	639	1430	242	405	851	1860
CCNA_00344	NC_011916.1	358988	359335	+	348	2	0	2	18	13	26	1	2	39	52	5	1
CCNA_00345	NC_011916.1	359343	360176	-	834	37	33	6	15	7	16	27	140	0	4	8	239
CCNA_00346	NC_011916.1	360419	361819	+	1401	103	225	115	241	172	328	770	1186	259	565	835	3188
CCNA_00347	NC_011916.1	361909	362088	+	180	0	7	0	2	0	0	0	63	0	1	0	2
CCNA_R0104	NC_011916.1	362113	362212	-	100	1	0	0	5	0	1	0	0	0	2	1	1
CCNA_00348	NC_011916.1	362218	364221	-	2004	41	81	60	101	51	68	354	779	2	12	15	112
CCNA_00349	NC_011916.1	364395	365309	-	915	0	8	6	15	8	8	2	7	2	2	3	11
CCNA_00350	NC_011916.1	365306	365986	-	681	24	55	6	12	18	59	2	58	18	34	6	2
CCNA_00351	NC_011916.1	366112	368271	+	2160	22	85	29	109	42	79	78	115	11	65	12	50
CCNA_00352	NC_011916.1	368358	369155	-	798	36	95	67	159	80	149	288	620	158	301	531	1219
CCNA_00353	NC_011916.1	369280	370374	+	1095	41	47	22	52	35	70	3	45	22	45	582	781
CCNA_00354	NC_011916.1	370445	371152	+	708	8	61	4	20	31	86	132	190	12	103	6	12
CCNA_00355	NC_011916.1	371323	372567	+	1245	15	16	3	11	15	27	69	101	2	6	297	335
CCNA_R0105	NC_011916.1	372505	372817	-	313	0	1	0	0	0	0	0	0	0	0	0	0
CCNA_00356	NC_011916.1	372638	373402	+	765	3	6	4	23	15	33	86	124	1	1	479	601
CCNA_00357	NC_011916.1	373511	374938	+	1428	3	23	17	25	42	38	1	12	26	73	217	303
CCNA_00358	NC_011916.1	374976	375836	-	861	22	43	4	4	2	24	0	3	2	3	11	14
CCNA_00359	NC_011916.1	375919	376716	+	798	18	26	4	18	27	47	157	245	1	2	13	20
CCNA_00360	NC_011916.1	376916	377806	+	891	8	9	5	9	11	27	0	14	0	4	279	330
CCNA_00361	NC_011916.1	377803	378750	-	948	4	34	8	60	4	8	3	7	11	22	94	120
CCNA_00362	NC_011916.1	378802	379287	-	486	1	3	3	35	14	50	2	8	1	2	6	12
CCNA_00363	NC_011916.1	379324	380100	-	777	2	4	9	59	1	11	0	6	1	8	3	19
CCNA_00364	NC_011916.1	380179	381273	-	1095	96	197	58	80	63	168	486	1081	110	226	913	1383
CCNA_00365	NC_011916.1	381396	382655	-	1260	104	159	112	112	111	104	283	650	161	309	206	455
CCNA_00366	NC_011916.1	383009	383803	+	795	10	17	15	15	16	47	138	353	0	45	458	761
CCNA_00367	NC_011916.1	383800	384825	+	1026	41	84	44	117	39	92	139	256	151	380	79	246
CCNA_00368	NC_011916.1	384831	385667	+	837	8	25	12	37	13	39	83	129	78	183	185	276
CCNA_00369	NC_011916.1	385817	387130	+	1314	88	117	70	129	42	105	21	115	34	98	191	392
CCNA_03918	NC_011916.1	387425	387559	+	135	7	23	0	1	10	14	0	1	0	0	0	0
CCNA_00370	NC_011916.1	387576	388085	-	510	81	193	66	114	50	149	666	982	280	495	977	1479
CCNA_00371	NC_011916.1	388096	388629	-	534	143	279	265	462	163	275	526	1170	149	319	1185	2673
CCNA_00372	NC_011916.1	388756	388980	-	225	95	200	164	319	145	315	757	1313	168	370	1074	1334
CCNA_00373	NC_011916.1	389030	389791	-	762	120	255	119	293	156	318	1390	2183	304	507	1049	2457
CCNA_00374	NC_011916.1	389797	390177	-	381	69	114	26	41	38	83	369	728	284	486	403	393
CCNA_00375	NC_011916.1	390599	390988	+	390	86	135	0	25	21	57	80	315	8	119	405	831
CCNA_00376	NC_011916.1	391059	391838	+	780	29	31	50	33	33	36	52	242	88	98	20	23
CCNA_00377	NC_011916.1	391953	395396	-	3444	31	87	40	122	73	150	143	245	87	152	149	699
CCNA_00378	NC_011916.1	395418	396026	-	609	26	47	19	25	8	26	1	4	0	2	0	10
CCNA_00379	NC_011916.1	396026	396640	-	615	11	18	1	7	31	64	60	167	97	233	511	487
CCNA_R0106	NC_011916.1	396704	396827	-	124	0	1	0	1	0	2	11	15	2	9	0	0
CCNA_00380	NC_011916.1	396879	397418	-	540	2	8	16	18	2	5	0	10	1	2	8	9
CCNA_00381	NC_011916.1	397466	398515	+	1050	32	72	13	37	20	21	2	9	167	331	5	20
CCNA_00382	NC_011916.1	398637	399713	-	1077	60	138	56	130	41	84	156	429	26	92	2	24
CCNA_00383	NC_011916.1	399852	400487	-	636	4	12	9	54	25	31	1	8	1	2	340	240
CCNA_00384	NC_011916.1	400574	401479	+	906	6	20	9	19	12	12	7	20	1	4	2	12
CCNA_00385	NC_011916.1	401527	402861	+	1335	27	46	6	7	41	54	61	101	0	21	5	16
CCNA_00386	NC_011916.1	402858	403445	-	588	17	17	18	25	0	13	1	7	0	0	89	211
CCNA_00387	NC_011916.1	403575	403997	+	423	2	6	7	5	8	6	65	110	1	3	1	6
CCNA_00388	NC_011916.1	404125	405006	-	882	31	90	16	37	2	10	43	95	11	20	6	7
CCNA_00389	NC_011916.1	405104	405895	-	792	3	7	3	8	6	31	135	181	2	3	7	9
CCNA_00390	NC_011916.1	405999	407213	+	1215	14	25	14	77	10	38	64	182	35	79	29	25
CCNA_00391	NC_011916.1	407210	407767	+	558	10	37	2	22	6	11	75	231	6	9	2	15
CCNA_00392	NC_011916.1	407848	409182	+	1335	77	94	84	127	48	92	235	396	177	261	635	870
CCNA_R0201	NC_011916.1	409219	409296	+	78	0	0	0	2	0	1	1	0	26	38	0	0
CCNA_00393	NC_011916.1	409326	410552	-	1227	6	44	22	23	6	19	6	15	0	2	6	19
CCNA_00394	NC_011916.1	410549	410899	-	351	1	2	0	2	2	5	91	130	6	58	3	5
CCNA_00395	NC_011916.1	411052	412842	+	1791	39	55	37	84	3	46	9	20	3	11	410	549
CCNA_00396	NC_011916.1	412933	413610	-	678	10	19	1	8	3	6	140	135	1	11	1	15
CCNA_00397	NC_011916.1	413741	415279	+	1539	37	73	19	63	24	34	217	353	1	10	8	16
CCNA_00398	NC_011916.1	415406	416764	-	1359	167	355	247	388	117	285	710	1876	370	639	874	1016
CCNA_00399	NC_011916.1	416919	418016	+	1098	34	48	53	89	35	39	7	16	3	52	15	16
CCNA_00400	NC_011916.1	418061	418504	+	444	2	0	5	12	9	11	0	6	1	1	1	7
CCNA_00401	NC_011916.1	418501	419271	+	771	0	18	33	42	0	11	0	5	0	2	3	13
CCNA_00402	NC_011916.1	419275	419691	+	417	1	8	2	10	16	11	0	3	0	7	0	5
CCNA_00403	NC_011916.1	419728	420699	+	972	28	56	9	11	3	17	17	25	0	2	6	11
CCNA_00404	NC_011916.1	420699	421214	+	516	10	6	4	2	12	7	0	8	0	6	12	8
CCNA_00405	NC_011916.1	421211	422068	+	858	3	6	6	17	3	3	4	11	0	2	5	26
CCNA_R0107	NC_011916.1	422074	422176	+	103	2	1	0	2	2	0	0	1	0	0	0	0
CCNA_00406	NC_011916.1	422170	422538	-	369	1	3	0	7	1	3	2	3	0	1	1	8
CCNA_00407	NC_011916.1	422528	423007	+	480	1	2	1	3	11	23	21	73	12	18	283	202
CCNA_00408	NC_011916.1	423040	424308	-	1269	31	58	54	79	12	40	5	21	120	245	167	280
CCNA_00409	NC_011916.1	424406	424450	+	45	2	11	2	0	0	1	0	0	0	0	0	0
CCNA_00410	NC_011916.1	424513	425043	+	531	15	20	3	3	1	8	3	38	0	2	4	8
CCNA_00411	NC_011916.1	425076	425639	+	564	13	9	37	100	5	33	0	2	1	0	9	34
CCNA_00412	NC_011916.1	425636	426286	+	651	7	17	14	44	19	28	1	11	7	82	142	265
CCNA_00413	NC_011916.1	426379	427632	+	1254	15	60	63	113	36	69	26	190	12	53	516	1209
CCNA_00414	NC_011916.1	427653	428354	+	702	1	6	18	78	6	11	40	148	36	154	340	455
CCNA_00415	NC_011916.1	428613	429584	-	972	27	45	19	41	31	95	3	25	103	157	58	352
CCNA_00416	NC_011916.1	429725	430123	-	399	13	31	4	2	3	20	16	88	49	57	0	7
CCNA_00417	NC_011916.1	430127	430498	-	372	0	3	0	13	20	36	1	2	0	0	4	221
CCNA_00419	NC_011916.1	430733	431269	+	537	2	4	4	31	0	10	32	107	2	7	391	310
CCNA_00420	NC_011916.1	431334	431885	-	552	0	3	4	5	9	13	1	9	0	1	0	8
CCNA_00421	NC_011916.1	431882	432286	-	405	48	74	0	7	2	1	12	158	24	55	35	42
CCNA_00422	NC_011916.1	432336	433088	-	753	18	34	25	66	24	57	110	220	76	136	698	969
CCNA_03919	NC_011916.1	433090	433170	-	81	0	1	0	0	1	3	0	0	0	0	0	0
CCNA_00423	NC_011916.1	433404	433874	+	471	0	5	1	10	1	3	41	129	0	1	204	278
CCNA_00424	NC_011916.1	434121	435560	+	1440	68	142	42	64	44	69	22	266	69	68	14	144
CCNA_00425	NC_011916.1	435633	436094	-	462	2	2	0	0	1	6	0	0	0	0	0	0
CCNA_00426	NC_011916.1	436545	436889	+	345	0	7	1	4	1	13	5	23	1	1	74	91
CCNA_00427	NC_011916.1	436958	437146	+	189	3	2	0	2	1	4	63	76	0	2	2	3
CCNA_00428	NC_011916.1	437146	437328	+	183	0	0	0	2	3	11	0	2	0	0	0	1
CCNA_00429	NC_011916.1	437383	437550	+	168	0	2	0	1	1	4	0	1	2	4	0	4
CCNA_00430	NC_011916.1	437556	437741	-	186	0	4	6	23	1	0	0	4	7	6	0	9
CCNA_00431	NC_011916.1	437761	437883	+	123	3	1	0	1	0	1	0	0	0	0	185	194
CCNA_00432	NC_011916.1	438156	438650	-	495	4	7	2	4	3	20	2	1	7	77	0	4
CCNA_00433	NC_011916.1	438748	439005	+	258	2	9	3	6	2	13	1	0	1	0	4	7
CCNA_00434	NC_011916.1	439068	440003	+	936	19	47	18	23	1	11	4	16	1	4	20	101
CCNA_00435	NC_011916.1	440156	441607	+	1452	42	88	50	95	66	152	265	470	100	172	10	27
CCNA_00436	NC_011916.1	441717	442865	+	1149	9	16	25	71	5	11	5	7	2	8	232	502
CCNA_00437	NC_011916.1	443064	444677	+	1614	7	9	48	91	17	34	43	122	32	44	5	13
CCNA_00438	NC_011916.1	444889	445200	-	312	97	223	115	249	75	164	292	762	224	451	186	594
CCNA_00439	NC_011916.1	445497	447518	+	2022	218	339	220	331	115	211	699	1454	339	755	1565	2643
CCNA_00440	NC_011916.1	447518	447805	+	288	34	66	57	81	67	69	65	176	73	90	216	350
CCNA_00441	NC_011916.1	447802	448167	+	366	32	60	64	84	50	114	181	585	264	507	326	606
CCNA_00442	NC_011916.1	448237	450525	+	2289	139	271	100	121	115	247	574	987	125	320	329	759
CCNA_00443	NC_011916.1	450529	450996	+	468	0	3	16	29	4	17	3	3	64	115	9	384
CCNA_00444	NC_011916.1	450996	451877	+	882	86	125	125	194	47	79	324	575	182	196	371	1393
CCNA_00445	NC_011916.1	451877	452911	+	1035	10	20	73	102	53	110	331	747	111	267	644	911
CCNA_00446	NC_011916.1	452915	453304	+	390	5	43	25	52	18	32	177	188	83	201	76	114
CCNA_00447	NC_011916.1	453301	453864	+	564	54	205	34	97	1	17	189	443	32	351	97	191
CCNA_00448	NC_011916.1	453868	454251	+	384	6	82	19	48	17	43	0	7	30	125	185	354
CCNA_00449	NC_011916.1	454259	454861	+	603	0	1	25	27	3	18	1	5	1	0	1	12
CCNA_00450	NC_011916.1	454858	455328	+	471	52	82	35	39	27	50	361	369	0	2	99	392
CCNA_00451	NC_011916.1	455598	458639	+	3042	30	29	113	120	15	32	32	120	74	161	338	566
CCNA_00452	NC_011916.1	458721	459857	-	1137	6	57	8	15	2	8	2	14	48	66	4	13
CCNA_00453	NC_011916.1	459857	460948	-	1092	46	62	15	33	28	28	12	31	8	25	190	195
CCNA_00454	NC_011916.1	460977	461789	-	813	4	4	57	92	9	8	3	5	33	98	211	237
CCNA_03920	NC_011916.1	461800	461868	-	69	0	0	1	1	0	7	0	0	0	0	0	0
CCNA_00455	NC_011916.1	461992	464661	+	2670	18	42	32	79	10	29	96	259	7	10	6	21
CCNA_R0006	NC_011916.1	464754	464843	+	90	0	2	0	0	0	0	0	1	0	0	1	0
CCNA_00456	NC_011916.1	464819	467092	+	2274	4	19	10	50	24	75	44	54	9	26	390	644
CCNA_00457	NC_011916.1	467106	469664	+	2559	6	19	45	78	12	28	68	143	10	31	11	44
CCNA_00458	NC_011916.1	469661	471415	+	1755	11	16	6	7	11	28	13	40	3	19	12	13
CCNA_00459	NC_011916.1	471542	472783	+	1242	7	24	6	19	4	42	15	22	123	103	155	398
CCNA_R0108	NC_011916.1	472905	472973	+	69	0	1	0	1	0	0	1	0	0	0	0	1
CCNA_00460	NC_011916.1	473245	473400	+	156	0	0	1	1	0	1	0	1	0	1	3	1
CCNA_03921	NC_011916.1	474254	474409	+	156	0	1	0	1	1	1	0	2	1	0	92	184
CCNA_03998	NC_011916.1	475532	476800	+	1269	27	72	19	31	34	79	172	268	10	24	256	269
CCNA_00464	NC_011916.1	477514	477678	+	165	2	2	16	31	0	1	1	1	0	1	291	357
CCNA_00465	NC_011916.1	477921	479033	+	1113	63	130	131	271	123	267	678	1253	161	461	590	819
CCNA_00466	NC_011916.1	479191	480435	+	1245	65	121	115	207	122	240	296	890	127	111	1468	1799
CCNA_00467	NC_011916.1	480439	481710	+	1272	43	109	40	98	48	134	123	316	34	153	110	597
CCNA_00468	NC_011916.1	481820	481933	-	114	0	0	0	2	0	1	0	0	0	0	0	1
CCNA_00469	NC_011916.1	482231	483454	-	1224	10	29	32	96	36	51	260	519	9	11	18	211
CCNA_03922	NC_011916.1	483798	484859	+	1062	55	163	55	141	53	132	280	588	93	238	438	753
CCNA_00470	NC_011916.1	484789	486132	-	1344	14	44	30	73	41	107	214	448	24	129	1	6
CCNA_00471	NC_011916.1	486159	487127	-	969	51	54	43	69	33	67	138	176	104	155	10	40
CCNA_00472	NC_011916.1	487093	488169	-	1077	114	271	163	296	138	244	10	93	269	438	622	1225
CCNA_00473	NC_011916.1	488274	488768	-	495	8	9	2	2	6	9	12	3	81	88	2	3
CCNA_00474	NC_011916.1	488768	491578	-	2811	19	30	10	72	10	54	8	18	3	17	189	722
CCNA_00475	NC_011916.1	491512	493329	-	1818	9	29	6	14	6	11	8	9	2	6	6	9
CCNA_00476	NC_011916.1	493326	493709	-	384	5	2	1	1	1	1	1	1	1	0	0	0
CCNA_00477	NC_011916.1	494090	494284	-	195	0	14	9	12	0	0	1	4	0	0	0	3
CCNA_00478	NC_011916.1	494406	495143	-	738	0	5	0	3	9	6	0	2	0	1	0	1
CCNA_00479	NC_011916.1	495332	495655	+	324	0	1	3	22	3	4	93	120	0	2	0	1
CCNA_00480	NC_011916.1	495724	497022	-	1299	3	8	3	31	12	23	15	29	2	8	4	26
CCNA_00481	NC_011916.1	497352	497597	+	246	5	7	2	11	11	12	0	4	0	0	0	0
CCNA_00482	NC_011916.1	497584	498855	+	1272	30	55	6	12	3	18	140	149	81	141	105	259
CCNA_R0007	NC_011916.1	499085	499174	-	90	116	226	219	336	122	212	364	711	189	500	742	1134
CCNA_00483	NC_011916.1	499379	500224	-	846	62	105	50	177	25	66	73	127	77	168	115	139
CCNA_00484	NC_011916.1	500314	501015	-	702	17	14	17	17	1	9	14	18	26	45	213	336
CCNA_00485	NC_011916.1	501114	502142	-	1029	20	26	15	26	4	15	133	355	6	9	10	27
CCNA_00486	NC_011916.1	502235	504724	+	2490	18	71	26	81	47	57	104	163	6	65	16	29
CCNA_00487	NC_011916.1	504911	506605	+	1695	9	22	5	16	2	11	6	16	42	68	9	20
CCNA_00488	NC_011916.1	506715	507341	-	627	1	1	21	34	2	4	5	5	1	6	3	11
CCNA_00489	NC_011916.1	507328	507747	-	420	34	73	137	168	11	31	43	147	0	1	1	3
CCNA_00490	NC_011916.1	507838	508722	+	885	3	8	8	20	2	3	8	8	73	97	5	9
CCNA_00491	NC_011916.1	508870	509508	-	639	10	11	25	68	32	46	240	420	67	149	1148	2222
CCNA_00492	NC_011916.1	509704	511095	+	1392	40	85	94	144	53	111	321	629	99	202	5	17
CCNA_00493	NC_011916.1	511098	511559	+	462	16	20	8	11	6	11	1	8	0	1	2	0
CCNA_00494	NC_011916.1	511566	512027	+	462	23	19	25	39	17	35	1	2	27	52	264	308
CCNA_00495	NC_011916.1	512080	512334	+	255	7	22	1	2	3	19	114	145	0	0	3	1
CCNA_00496	NC_011916.1	512331	514298	+	1968	168	283	117	262	98	231	567	1236	212	602	1039	1707
CCNA_00497	NC_011916.1	514298	515224	+	927	32	47	8	31	92	92	107	192	141	159	316	487
CCNA_00498	NC_011916.1	515285	515404	-	120	0	2	1	0	0	2	0	0	1	0	132	171
CCNA_00499	NC_011916.1	515480	515845	-	366	3	5	20	32	5	7	0	2	1	4	1	1
CCNA_00500	NC_011916.1	515842	516741	-	900	3	10	27	54	2	9	28	98	3	6	343	368
CCNA_00501	NC_011916.1	516738	518417	-	1680	10	33	57	94	30	62	51	158	45	80	118	494
CCNA_00502	NC_011916.1	518474	519211	+	738	9	16	24	69	2	17	108	145	3	6	3	9
CCNA_R0202	NC_011916.1	518733	518754	-	22	0	0	0	0	0	0	0	0	0	0	0	0
CCNA_00503	NC_011916.1	519310	519732	+	423	11	19	1	4	1	1	20	70	0	3	171	207
CCNA_00504	NC_011916.1	519729	520193	-	465	1	1	2	15	1	4	0	1	0	2	0	8
CCNA_00505	NC_011916.1	520398	520949	+	552	66	129	163	285	167	326	1480	2224	485	787	1545	3084
CCNA_00506	NC_011916.1	520955	522235	+	1281	160	405	297	578	307	589	1332	3039	561	1360	2321	4713
CCNA_00507	NC_011916.1	522241	523086	+	846	145	269	182	444	239	370	750	1450	221	654	810	1447
CCNA_00508	NC_011916.1	523154	523927	-	774	0	7	17	28	9	44	2	5	0	3	8	11
CCNA_00509	NC_011916.1	523993	524526	-	534	23	42	26	40	14	24	34	68	1	5	4	6
CCNA_00510	NC_011916.1	524523	525200	-	678	16	15	1	0	5	10	1	9	0	1	9	24
CCNA_00511	NC_011916.1	525200	525880	-	681	0	12	1	2	1	3	2	6	1	2	0	12
CCNA_00512	NC_011916.1	525945	527045	-	1101	23	56	58	125	32	82	115	180	215	353	174	1297
CCNA_03885	NC_011916.1	527284	527934	+	651	5	23	1	3	13	19	207	369	68	146	8	8
CCNA_00514	NC_011916.1	528078	528908	+	831	8	29	2	6	14	14	46	105	0	1	15	15
CCNA_00515	NC_011916.1	529324	531657	+	2334	235	437	280	505	220	445	1167	2396	444	819	1482	3909
CCNA_00516	NC_011916.1	531683	532432	-	750	17	39	1	12	18	64	146	200	2	8	0	9
CCNA_00517	NC_011916.1	532435	533052	-	618	7	13	19	34	4	9	58	197	14	70	4	14
CCNA_00518	NC_011916.1	533140	533733	-	594	95	220	154	388	138	256	604	1403	342	644	1084	2010
CCNA_00519	NC_011916.1	533891	534967	-	1077	31	45	39	76	14	34	5	26	73	156	17	40
CCNA_00520	NC_011916.1	535198	536136	-	939	81	106	30	62	31	78	226	433	49	73	13	187
CCNA_00521	NC_011916.1	536277	536528	-	252	1	0	19	30	0	1	0	3	0	2	0	1
CCNA_00522	NC_011916.1	536509	536805	-	297	1	4	25	9	11	24	84	132	0	1	7	5
CCNA_00523	NC_011916.1	536853	537638	-	786	10	22	6	16	32	56	19	52	34	69	38	61
CCNA_00524	NC_011916.1	537635	538759	-	1125	24	28	38	108	46	46	3	116	2	2	244	310
CCNA_00525	NC_011916.1	538746	539654	-	909	5	11	6	50	29	53	71	147	0	53	86	95
CCNA_00526	NC_011916.1	539769	540026	+	258	22	26	36	55	21	32	0	0	66	84	288	236
CCNA_00527	NC_011916.1	540157	540663	+	507	81	114	8	28	41	70	147	268	151	231	2	8
CCNA_00528	NC_011916.1	540844	541626	+	783	37	75	11	38	24	100	3	18	24	47	79	445
CCNA_00529	NC_011916.1	541695	542231	+	537	25	34	19	67	9	20	5	6	23	14	49	271
CCNA_00530	NC_011916.1	542581	543099	+	519	948	1661	870	1760	1143	2114	6738	11700	2210	4307	9581	12241
CCNA_00531	NC_011916.1	543145	543528	+	384	523	1038	455	1059	629	1356	3317	6634	1372	2783	5664	9957
CCNA_00532	NC_011916.1	543952	544842	+	891	4	34	38	27	7	22	2	5	3	3	19	159
CCNA_00533	NC_011916.1	544865	546187	-	1323	8	21	1	11	6	11	59	108	2	6	209	250
CCNA_00534	NC_011916.1	546314	547336	+	1023	12	54	19	26	8	9	74	114	0	2	3	13
CCNA_00535	NC_011916.1	547379	547537	+	159	1	1	2	3	1	2	1	0	0	0	670	779
CCNA_00536	NC_011916.1	547831	551901	+	4071	629	1327	844	1905	845	1517	3980	7294	1429	2890	4270	8284
CCNA_00537	NC_011916.1	552015	556205	+	4191	621	1022	713	1590	609	1252	3843	7215	1680	3248	5417	8060
CCNA_R0109	NC_011916.1	553414	553828	-	415	0	0	0	0	0	0	0	0	0	0	0	0
CCNA_00538	NC_011916.1	556424	558220	+	1797	33	60	38	55	8	23	4	17	53	67	10	19
CCNA_00539	NC_011916.1	558249	559709	-	1461	21	24	5	7	5	15	5	6	1	2	116	345
CCNA_00540	NC_011916.1	559904	560776	-	873	12	32	8	14	12	19	55	275	16	47	69	90
CCNA_03923	NC_011916.1	560907	560972	-	66	2	0	0	0	4	4	0	1	0	0	0	1
CCNA_00541	NC_011916.1	561036	561344	+	309	1	1	1	1	2	2	0	1	7	32	0	2
CCNA_00542	NC_011916.1	561341	561664	-	324	13	24	30	56	5	10	18	81	2	2	0	3
CCNA_00543	NC_011916.1	561713	562363	-	651	8	36	18	42	11	23	108	279	17	56	254	266
CCNA_00544	NC_011916.1	562579	563754	+	1176	50	87	20	68	20	57	304	464	23	154	328	1014
CCNA_R0110	NC_011916.1	563800	564505	-	706	12	13	0	0	1	0	0	0	0	0	0	0
CCNA_00545	NC_011916.1	563825	564547	+	723	0	0	0	0	0	1	0	1	0	0	0	3
CCNA_00546	NC_011916.1	564671	565453	+	783	27	40	83	87	2	15	0	91	0	5	134	368
CCNA_00547	NC_011916.1	565748	565879	+	132	7	4	0	0	2	6	113	185	0	0	1	0
CCNA_00548	NC_011916.1	565904	566170	+	267	2	5	4	7	7	9	23	32	2	3	1	12
CCNA_00549	NC_011916.1	566164	567090	+	927	1	3	1	6	10	31	46	31	15	29	2	9
CCNA_00550	NC_011916.1	567006	568052	+	1047	2	3	1	5	11	25	11	139	21	64	11	16
CCNA_00551	NC_011916.1	568260	568700	-	441	15	14	28	41	1	21	1	2	0	2	1	3
CCNA_00552	NC_011916.1	568956	569426	-	471	17	20	10	13	0	1	1	5	28	68	3	5
CCNA_00553	NC_011916.1	569423	570172	-	750	21	33	5	27	10	16	134	213	1	1	5	8
CCNA_00554	NC_011916.1	570238	571044	+	807	1	8	6	11	2	12	2	14	134	221	390	435
CCNA_00555	NC_011916.1	571117	571461	+	345	0	4	0	3	3	4	0	4	0	2	46	78
CCNA_00556	NC_011916.1	571546	573063	+	1518	16	26	22	66	21	28	4	19	26	83	13	42
CCNA_00557	NC_011916.1	573020	573799	-	780	5	8	15	59	3	15	110	184	1	6	53	86
CCNA_00558	NC_011916.1	573796	574461	-	666	0	16	43	77	3	5	105	133	3	9	1	8
CCNA_00559	NC_011916.1	574589	575737	-	1149	20	31	36	42	14	27	5	20	70	117	7	22
CCNA_00560	NC_011916.1	575815	576327	+	513	13	17	36	81	3	11	67	90	2	4	1	2
CCNA_00561	NC_011916.1	576324	576668	+	345	0	0	0	0	1	0	1	1	16	30	2	4
CCNA_00562	NC_011916.1	576665	577723	+	1059	15	16	18	30	4	20	2	14	1	4	85	163
CCNA_00563	NC_011916.1	577720	578457	+	738	8	15	9	27	12	23	52	74	11	35	47	144
CCNA_00564	NC_011916.1	578467	579972	+	1506	26	41	23	45	16	58	6	9	0	5	365	588
CCNA_00565	NC_011916.1	580036	581778	-	1743	7	30	50	133	59	101	33	123	13	110	4	33
CCNA_R0008	NC_011916.1	582032	582108	+	77	51	138	94	164	82	143	25	163	72	175	279	347
CCNA_00566	NC_011916.1	582330	583541	-	1212	28	42	35	71	24	81	97	279	144	241	4	18
CCNA_00567	NC_011916.1	583664	585976	-	2313	34	44	24	63	6	40	65	142	8	23	39	92
CCNA_00568	NC_011916.1	585948	587111	-	1164	23	57	40	106	20	17	271	500	9	34	9	19
CCNA_00569	NC_011916.1	587111	588187	-	1077	2	4	13	32	13	17	5	11	65	124	4	19
CCNA_00570	NC_011916.1	588225	589130	-	906	3	12	50	72	4	10	3	7	2	7	7	22
CCNA_00571	NC_011916.1	589132	591768	+	2637	6	21	48	59	4	29	64	172	18	42	22	48
CCNA_00572	NC_011916.1	591765	593513	+	1749	11	18	7	16	7	17	14	26	5	18	6	22
CCNA_00573	NC_011916.1	593829	596600	+	2772	14	45	8	39	18	24	7	190	107	199	15	26
CCNA_00574	NC_011916.1	596740	599052	+	2313	17	26	32	79	23	63	3	16	4	13	9	31
CCNA_00575	NC_011916.1	599049	600167	+	1119	10	38	24	46	26	40	47	213	1	3	2	11
CCNA_00576	NC_011916.1	600176	601420	+	1245	1	3	3	8	10	26	0	12	1	3	2	10
CCNA_00578	NC_011916.1	601496	604033	+	2538	3	27	6	30	47	65	5	20	7	21	32	59
CCNA_R0203	NC_011916.1	604150	604199	+	50	0	0	0	0	0	0	0	0	0	1	0	0
CCNA_00579	NC_011916.1	604210	606009	-	1800	12	27	27	65	13	31	95	283	5	11	34	37
CCNA_00580	NC_011916.1	606207	609290	-	3084	18	26	33	47	15	26	35	142	69	113	42	240
CCNA_03886	NC_011916.1	609287	611065	-	1779	27	70	37	120	5	25	8	13	48	105	243	319
CCNA_00582	NC_011916.1	611200	611757	+	558	6	6	1	5	3	4	15	49	63	85	157	236
CCNA_00583	NC_011916.1	611838	613205	-	1368	10	3	18	56	13	35	3	13	16	34	82	153
CCNA_00585	NC_011916.1	613324	614379	+	1056	0	5	4	5	18	18	4	72	3	4	0	13
CCNA_00586	NC_011916.1	614415	615746	-	1332	10	21	4	14	4	14	64	133	2	4	6	26
CCNA_00587	NC_011916.1	615934	617430	+	1497	6	11	9	53	15	45	21	68	132	255	549	382
CCNA_00588	NC_011916.1	617604	617843	+	240	8	13	23	22	0	1	2	4	0	1	0	1
CCNA_00589	NC_011916.1	617851	618567	-	717	3	11	26	42	4	16	321	328	2	3	1	3
CCNA_00590	NC_011916.1	618615	619724	-	1110	1	4	10	21	2	12	10	111	1	3	8	13
CCNA_00591	NC_011916.1	619728	621791	-	2064	17	29	15	72	62	100	217	379	41	41	466	423
CCNA_00592	NC_011916.1	621804	622871	-	1068	19	29	20	42	14	38	50	141	0	7	7	16
CCNA_R0111	NC_011916.1	622892	623341	+	450	0	0	0	0	0	0	0	0	0	0	0	0
CCNA_00593	NC_011916.1	622934	624517	-	1584	18	16	7	17	12	27	95	108	0	6	10	17
CCNA_00594	NC_011916.1	624522	626342	-	1821	10	36	20	68	12	34	20	145	3	6	23	33
CCNA_R0112	NC_011916.1	626656	626908	+	253	5	1	3	0	6	7	2	0	0	1	3	0
CCNA_00595	NC_011916.1	626899	627888	-	990	6	16	42	66	6	20	67	93	53	107	4	18
CCNA_00596	NC_011916.1	627846	628364	-	519	0	1	0	2	5	4	1	2	0	1	3	4
CCNA_00597	NC_011916.1	628523	631663	+	3141	190	299	218	366	62	121	189	294	81	144	592	723
CCNA_00598	NC_011916.1	631886	634816	-	2931	19	56	14	42	36	41	4	14	4	7	281	550
CCNA_03887	NC_011916.1	635047	635673	+	627	0	6	14	49	6	12	49	86	1	4	1	5
CCNA_00600	NC_011916.1	635661	636890	+	1230	10	18	5	24	12	33	114	149	9	16	551	684
CCNA_00601	NC_011916.1	636877	637848	+	972	19	25	10	6	23	44	203	406	2	37	7	9
CCNA_00602	NC_011916.1	637845	639158	+	1314	11	30	16	30	22	42	9	17	32	93	90	770
CCNA_00603	NC_011916.1	639155	640153	+	999	36	51	25	69	22	49	16	160	44	87	24	17
CCNA_00604	NC_011916.1	640131	641012	+	882	3	6	4	9	1	9	14	24	0	6	267	736
CCNA_00605	NC_011916.1	641122	641910	-	789	48	95	14	21	23	48	219	326	129	265	6	9
CCNA_00607	NC_011916.1	642577	645570	+	2994	36	113	48	68	33	75	35	11	82	105	412	607
CCNA_00608	NC_011916.1	645702	647285	+	1584	15	11	35	42	7	8	3	54	3	16	4	23
CCNA_00609	NC_011916.1	647369	648415	+	1047	6	10	8	21	15	15	17	19	1	4	3	6
CCNA_00610	NC_011916.1	648428	651031	+	2604	16	31	53	82	13	36	206	440	11	95	264	394
CCNA_00611	NC_011916.1	651343	652815	+	1473	10	11	1	50	12	23	22	87	29	84	2	8
CCNA_00612	NC_011916.1	653295	654179	-	885	3	8	3	5	1	6	5	10	36	56	248	191
CCNA_00613	NC_011916.1	654176	655519	-	1344	0	13	7	7	2	7	6	15	1	4	4	7
CCNA_00614	NC_011916.1	655396	656883	-	1488	6	6	22	33	5	10	134	250	0	2	4	16
CCNA_00615	NC_011916.1	656945	659863	-	2919	75	81	28	84	52	55	298	403	88	98	42	189
CCNA_03924	NC_011916.1	659960	660031	-	72	4	9	0	0	1	0	0	0	0	0	0	0
CCNA_00616	NC_011916.1	660157	660612	-	456	0	2	0	4	4	7	2	2	0	0	1	3
CCNA_00617	NC_011916.1	660731	661774	+	1044	34	55	11	45	19	44	42	122	0	2	5	126
CCNA_00618	NC_011916.1	661761	663179	+	1419	36	64	28	62	41	76	74	224	5	8	33	223
CCNA_00619	NC_011916.1	663176	664456	+	1281	11	12	9	8	23	33	26	86	41	115	18	32
CCNA_00620	NC_011916.1	664466	665644	+	1179	42	103	20	39	23	32	94	276	55	106	225	369
CCNA_00621	NC_011916.1	666047	666601	-	555	2	6	0	6	0	3	1	4	0	3	176	360
CCNA_00622	NC_011916.1	666621	666806	+	186	0	1	0	0	2	2	0	2	1	0	0	1
CCNA_00623	NC_011916.1	666944	669151	+	2208	11	32	5	12	5	25	6	14	1	7	37	133
CCNA_03925	NC_011916.1	667900	668223	-	324	0	0	0	0	0	0	0	0	0	0	0	0
CCNA_00624	NC_011916.1	669233	670396	-	1164	13	30	5	8	3	18	25	45	40	144	5	16
CCNA_00625	NC_011916.1	670498	670875	+	378	17	17	0	2	8	4	0	5	8	12	1	5
CCNA_00626	NC_011916.1	670929	672842	-	1914	41	79	33	43	15	38	38	111	56	124	19	35
CCNA_00627	NC_011916.1	672921	673382	-	462	1	2	0	0	8	10	0	3	26	35	2	5
CCNA_00628	NC_011916.1	673388	673771	-	384	0	5	0	1	0	2	0	0	0	1	2	4
CCNA_00629	NC_011916.1	674363	676249	+	1887	6	33	5	23	7	23	104	152	2	81	6	18
CCNA_00630	NC_011916.1	676286	678580	+	2295	36	54	7	21	7	11	11	13	27	56	6	43
CCNA_00631	NC_011916.1	678577	679029	+	453	2	2	1	3	2	14	1	4	0	2	2	7
CCNA_00632	NC_011916.1	679026	679394	+	369	80	126	67	142	20	32	166	148	3	4	952	1120
CCNA_00633	NC_011916.1	679391	680467	+	1077	21	36	25	47	6	14	14	51	5	26	52	110
CCNA_00634	NC_011916.1	680464	681294	+	831	4	5	6	5	3	9	2	5	2	1	3	5
CCNA_00635	NC_011916.1	682056	683531	+	1476	33	70	19	52	29	131	20	85	128	244	1	35
CCNA_00636	NC_011916.1	683537	684388	+	852	51	83	47	65	36	115	346	950	2	3	411	473
CCNA_R0113	NC_011916.1	684418	684508	-	91	0	0	0	0	0	0	0	0	0	0	0	0
CCNA_00637	NC_011916.1	684440	687454	-	3015	21	55	12	39	31	56	269	642	11	31	77	192
CCNA_00638	NC_011916.1	687421	690129	-	2709	16	25	29	249	8	60	11	109	20	42	15	23
CCNA_00639	NC_011916.1	690126	691751	-	1626	56	71	10	11	9	22	4	5	1	1	308	277
CCNA_R0114	NC_011916.1	691049	691611	+	563	0	0	0	0	0	0	0	0	0	0	0	0
CCNA_00640	NC_011916.1	691897	692172	-	276	11	21	0	0	12	40	0	0	0	2	0	1
CCNA_00641	NC_011916.1	692376	692672	-	297	1	2	0	0	15	19	2	0	0	5	0	1
CCNA_00642	NC_011916.1	692642	692899	-	258	1	1	2	3	0	4	0	0	1	1	0	3
CCNA_00643	NC_011916.1	693356	693502	+	147	1	2	0	1	1	0	0	0	0	0	0	1
CCNA_00644	NC_011916.1	694013	695422	+	1410	7	53	4	13	1	22	3	15	133	220	189	140
CCNA_00645	NC_011916.1	695435	696727	+	1293	7	31	17	53	5	20	4	22	1	3	177	436
CCNA_00646	NC_011916.1	696739	697629	+	891	24	46	4	7	2	19	5	5	1	4	34	171
CCNA_00647	NC_011916.1	697642	698427	+	786	19	45	30	70	8	20	1	6	3	3	2	6
CCNA_00648	NC_011916.1	698432	699154	+	723	8	15	7	54	8	23	1	4	3	0	1	7
CCNA_00649	NC_011916.1	699198	700292	+	1095	22	36	8	14	1	10	65	248	2	4	18	75
CCNA_00650	NC_011916.1	700527	701747	+	1221	11	22	13	40	17	44	2	7	39	68	5	19
CCNA_00651	NC_011916.1	701776	704244	+	2469	19	33	14	38	6	29	49	141	3	12	36	38
CCNA_00652	NC_011916.1	704241	704585	+	345	1	1	0	0	1	1	1	1	0	1	8	3
CCNA_00653	NC_011916.1	704586	707264	+	2679	13	40	17	53	20	57	3	23	7	17	13	65
CCNA_00654	NC_011916.1	707254	708039	+	786	2	5	1	14	1	9	22	97	0	5	2	11
CCNA_R0009	NC_011916.1	708218	708312	+	95	0	1	10	12	0	0	1	0	0	0	0	0
CCNA_00655	NC_011916.1	708328	710310	-	1983	29	48	56	73	20	17	9	126	7	5	11	21
CCNA_00656	NC_011916.1	710696	712531	+	1836	15	24	83	116	44	111	14	35	147	242	16	138
CCNA_00657	NC_011916.1	712528	713880	+	1353	25	34	8	6	26	37	104	214	42	95	31	219
CCNA_00658	NC_011916.1	713877	714920	+	1044	43	64	52	54	14	44	7	14	13	142	115	271
CCNA_00659	NC_011916.1	714931	717825	+	2895	90	186	68	110	40	115	8	143	3	10	674	1025
CCNA_00660	NC_011916.1	717822	718802	-	981	13	22	14	15	13	32	82	131	22	92	2	6
CCNA_00661	NC_011916.1	718799	719233	-	435	0	17	20	23	15	17	1	15	12	21	7	6
CCNA_00662	NC_011916.1	719217	719564	-	348	0	1	4	18	1	2	0	3	0	0	0	1
CCNA_00663	NC_011916.1	719608	719943	-	336	0	4	6	14	1	5	1	1	7	51	0	2
CCNA_R0010	NC_011916.1	720365	720441	-	77	15	17	7	22	9	25	20	45	5	10	130	155
CCNA_00664	NC_011916.1	720528	721781	+	1254	49	78	5	7	16	27	11	6	5	4	17	262
CCNA_00665	NC_011916.1	721949	723094	+	1146	4	15	3	29	16	34	57	105	11	69	15	39
CCNA_00666	NC_011916.1	723091	723444	+	354	1	13	0	11	8	18	1	2	0	14	0	63
CCNA_00667	NC_011916.1	723506	724690	-	1185	3	25	27	72	13	28	72	100	37	131	6	15
CCNA_00668	NC_011916.1	724701	725753	-	1053	7	12	48	163	6	49	52	211	8	94	5	23
CCNA_00669	NC_011916.1	725750	728206	-	2457	28	64	27	61	37	71	18	68	17	50	81	359
CCNA_00670	NC_011916.1	728203	728955	-	753	2	7	23	47	2	5	7	17	3	2	7	11
CCNA_00671	NC_011916.1	728965	729756	-	792	15	15	29	42	17	34	145	360	35	126	275	708
CCNA_00672	NC_011916.1	729890	730693	-	804	16	20	23	46	1	7	169	212	0	1	9	16
CCNA_00673	NC_011916.1	730781	731788	+	1008	4	19	6	19	7	41	69	109	1	6	7	21
CCNA_00674	NC_011916.1	731887	733134	-	1248	24	53	19	17	25	49	26	124	3	5	211	290
CCNA_00675	NC_011916.1	733100	733495	-	396	41	45	14	28	14	27	9	240	36	40	455	338
CCNA_00676	NC_011916.1	733495	733734	-	240	6	12	6	26	2	8	3	2	69	92	146	279
CCNA_R0115	NC_011916.1	733806	733871	-	66	0	0	0	0	0	0	0	3	0	0	1	3
CCNA_00677	NC_011916.1	733882	734571	-	690	143	334	226	532	249	538	1681	4028	637	1315	1887	3515
CCNA_00678	NC_011916.1	734576	735007	-	432	176	373	103	265	248	507	1317	2828	171	554	2367	4555
CCNA_R0011	NC_011916.1	735387	735530	-	144	4	9	2	5	2	3	21	55	0	0	11	87
CCNA_00679	NC_011916.1	735544	736479	+	936	5	8	5	9	1	4	58	55	0	14	59	68
CCNA_00680	NC_011916.1	736612	737247	-	636	6	34	8	5	11	15	1	4	0	1	8	11
CCNA_00681	NC_011916.1	737244	737981	-	738	12	17	2	25	9	14	1	11	2	2	3	9
CCNA_00682	NC_011916.1	738076	738534	+	459	7	15	1	9	5	17	0	3	0	3	0	6
CCNA_00683	NC_011916.1	738931	740460	-	1530	7	8	13	8	11	17	32	57	0	2	4	24
CCNA_00684	NC_011916.1	740473	741111	-	639	0	5	18	20	4	9	39	78	1	5	2	8
CCNA_00685	NC_011916.1	741108	741725	-	618	28	56	36	132	14	44	11	205	44	106	87	343
CCNA_00686	NC_011916.1	741897	743330	+	1434	28	33	39	116	30	50	140	184	3	4	17	17
CCNA_00687	NC_011916.1	743356	743727	-	372	2	4	4	2	5	5	2	5	9	26	50	371
CCNA_00688	NC_011916.1	743786	745096	-	1311	31	41	6	12	13	31	7	21	13	121	16	6
CCNA_00689	NC_011916.1	745305	747635	+	2331	24	43	9	19	3	22	81	115	13	21	130	188
CCNA_00690	NC_011916.1	747704	748207	-	504	48	96	23	64	62	88	180	252	195	393	575	969
CCNA_00691	NC_011916.1	748560	748901	-	342	40	75	20	32	28	38	61	92	52	56	42	61
CCNA_00692	NC_011916.1	749166	751250	+	2085	17	26	21	59	22	29	76	171	0	6	3	15
CCNA_00693	NC_011916.1	751485	751778	-	294	1	2	0	1	1	1	0	5	1	2	1	4
CCNA_00694	NC_011916.1	751775	754342	-	2568	44	64	36	95	14	51	296	360	7	15	157	269
CCNA_00695	NC_011916.1	754514	756148	-	1635	21	64	24	44	25	83	53	134	4	16	485	1212
CCNA_00696	NC_011916.1	756229	756804	+	576	0	2	1	2	5	8	1	8	2	9	6	12
CCNA_R0116	NC_011916.1	757024	757263	-	240	17	19	1	4	1	2	40	189	0	0	0	3
CCNA_00698	NC_011916.1	757318	757815	-	498	2	5	0	5	13	18	0	3	0	0	2	6
CCNA_00699	NC_011916.1	758081	758380	+	300	47	77	118	199	14	35	421	797	68	155	90	111
CCNA_R0012	NC_011916.1	758663	758806	-	144	11	3	1	2	2	9	22	43	1	0	9	83
CCNA_00700	NC_011916.1	759099	761024	-	1926	25	43	12	30	13	32	5	17	40	99	19	78
CCNA_00701	NC_011916.1	761611	761820	+	210	3	9	8	41	0	10	0	0	17	33	1	4
CCNA_03888	NC_011916.1	761965	762324	+	360	1	3	4	3	2	4	0	0	0	1	1	8
CCNA_00703	NC_011916.1	762427	762633	+	207	0	2	0	0	1	0	0	2	0	0	261	331
CCNA_00704	NC_011916.1	762676	762873	+	198	2	5	3	1	3	2	0	3	39	57	4	6
CCNA_00705	NC_011916.1	763025	763315	-	291	46	43	18	42	19	46	0	3	0	0	261	267
CCNA_00706	NC_011916.1	763590	764003	-	414	5	7	4	2	1	3	1	11	2	2	13	46
CCNA_00707	NC_011916.1	764103	765185	-	1083	20	26	4	14	35	62	100	132	8	38	74	126
CCNA_00708	NC_011916.1	765182	767110	-	1929	79	127	96	156	43	106	232	282	7	20	235	274
CCNA_00709	NC_011916.1	767218	767400	+	183	0	0	0	2	7	7	0	1	0	2	0	1
CCNA_00710	NC_011916.1	767521	768690	-	1170	21	63	14	19	11	27	4	5	71	106	10	76
CCNA_00711	NC_011916.1	768833	769933	+	1101	6	14	20	65	18	49	3	14	2	11	9	17
CCNA_00712	NC_011916.1	769938	770252	-	315	5	13	0	4	0	3	2	1	0	3	1	3
CCNA_03926	NC_011916.1	770292	770423	-	132	1	0	4	16	1	1	1	3	7	4	2	0
CCNA_00714	NC_011916.1	770440	770709	-	270	2	3	0	4	5	7	1	0	0	0	1	1
CCNA_03927	NC_011916.1	770798	771094	-	297	0	1	12	54	0	1	0	1	0	0	0	2
CCNA_03928	NC_011916.1	771136	771327	-	192	25	14	3	2	2	0	1	1	0	2	0	0
CCNA_00716	NC_011916.1	771391	771567	-	177	0	0	0	1	0	0	1	0	0	1	2	2
CCNA_03929	NC_011916.1	771721	771834	-	114	1	5	0	2	0	1	0	2	0	0	3	35
CCNA_00718	NC_011916.1	771887	772783	-	897	9	9	22	43	20	46	157	309	62	154	4	5
CCNA_R0117	NC_011916.1	772628	773769	+	1142	4	9	23	25	1	11	65	74	13	159	4	24
CCNA_03930	NC_011916.1	772790	772894	-	105	0	0	0	0	0	0	0	0	0	0	0	0
CCNA_03931	NC_011916.1	773437	773730	-	294	0	0	0	0	0	0	0	0	0	0	0	0
CCNA_03932	NC_011916.1	773733	773987	-	255	57	85	161	241	59	69	249	899	127	365	173	576
CCNA_03933	NC_011916.1	774018	774278	-	261	110	226	256	584	187	320	511	1122	260	553	741	943
CCNA_00719	NC_011916.1	774394	775635	+	1242	26	65	13	43	43	95	63	181	92	211	643	837
CCNA_00720	NC_011916.1	775596	777776	+	2181	26	65	44	72	86	101	425	823	18	87	248	353
CCNA_00721	NC_011916.1	777942	779585	-	1644	1150	2288	1354	2591	1208	2541	5988	12388	2868	6205	11840	20336
CCNA_00722	NC_011916.1	779643	779933	-	291	161	376	232	365	193	404	1714	2350	207	552	823	1890
CCNA_00723	NC_011916.1	780108	780302	+	195	5	21	0	2	0	2	0	3	54	85	286	285
CCNA_00724	NC_011916.1	780321	780749	+	429	14	27	0	9	19	51	10	29	1	2	7	17
CCNA_00725	NC_011916.1	780950	781612	-	663	6	4	1	5	4	9	51	112	12	11	6	23
CCNA_00726	NC_011916.1	781663	782970	-	1308	2	9	30	94	22	38	5	11	17	77	216	288
CCNA_00727	NC_011916.1	783127	783723	+	597	12	34	1	0	11	15	0	8	1	1	0	4
CCNA_00728	NC_011916.1	783796	784959	+	1164	5	22	9	28	30	30	6	16	2	9	17	22
CCNA_00729	NC_011916.1	785054	786358	+	1305	22	56	14	24	26	51	63	92	188	257	136	245
CCNA_00730	NC_011916.1	786434	787201	+	768	3	13	66	83	20	29	152	178	114	121	2	14
CCNA_00731	NC_011916.1	787361	789274	-	1914	21	35	56	106	16	24	1	19	6	39	154	313
CCNA_00732	NC_011916.1	789387	790439	+	1053	30	49	37	76	19	31	4	19	2	10	1002	1295
CCNA_00733	NC_011916.1	790499	791437	+	939	12	33	3	8	22	42	218	354	3	3	137	261
CCNA_00734	NC_011916.1	791491	792399	+	909	12	27	3	4	2	7	2	7	62	75	225	502
CCNA_00735	NC_011916.1	792461	793030	-	570	60	88	2	9	32	60	214	467	200	160	6	11
CCNA_00736	NC_011916.1	793143	793649	-	507	13	28	35	32	12	21	5	90	24	88	186	332
CCNA_00737	NC_011916.1	793796	796705	-	2910	86	164	113	233	49	124	434	921	69	215	684	1891
CCNA_03934	NC_011916.1	796784	796828	-	45	0	0	0	0	1	0	0	0	0	0	0	2
CCNA_00738	NC_011916.1	797019	798110	-	1092	9	15	12	25	19	26	3	4	3	5	9	16
CCNA_00740	NC_011916.1	798513	799454	-	942	16	24	42	75	15	66	134	270	53	65	9	11
CCNA_00741	NC_011916.1	799454	799879	-	426	33	61	27	72	2	2	64	160	2	8	186	262
CCNA_00742	NC_011916.1	799937	800797	-	861	6	15	3	7	22	42	47	126	1	1	7	11
CCNA_00743	NC_011916.1	800944	801510	+	567	3	5	5	6	10	14	4	3	1	5	7	7
CCNA_00744	NC_011916.1	801752	802036	+	285	12	32	7	56	5	28	88	122	46	73	78	557
CCNA_00745	NC_011916.1	802070	802774	-	705	10	19	3	25	5	32	0	2	1	3	1	8
CCNA_03935	NC_011916.1	802082	802519	+	438	0	0	0	0	0	0	0	0	0	0	0	0
CCNA_00746	NC_011916.1	802771	803496	-	726	7	17	4	9	1	7	2	13	2	6	2	6
CCNA_00747	NC_011916.1	803595	804953	-	1359	11	16	22	92	24	60	55	83	4	7	6	15
CCNA_00748	NC_011916.1	805164	805484	+	321	15	18	1	2	0	3	41	76	0	2	3	5
CCNA_00749	NC_011916.1	805489	807384	+	1896	59	102	34	101	74	117	289	461	24	88	117	1142
CCNA_00750	NC_011916.1	807593	808621	-	1029	4	16	2	11	10	15	6	9	3	7	19	143
CCNA_R0118	NC_011916.1	808729	808841	+	113	7	12	2	12	13	20	1	7	4	8	2	36
CCNA_00751	NC_011916.1	808992	810233	-	1242	32	55	51	73	31	41	242	277	120	261	493	700
CCNA_00752	NC_011916.1	810384	811262	-	879	56	159	88	162	42	135	376	1107	161	312	711	709
CCNA_00753	NC_011916.1	811400	812437	-	1038	36	64	3	5	11	13	113	82	1	3	214	504
CCNA_00754	NC_011916.1	812595	813296	-	702	15	52	6	4	2	4	83	160	59	92	10	11
CCNA_00755	NC_011916.1	813444	813884	-	441	10	27	4	4	5	17	2	4	37	54	0	2
CCNA_00756	NC_011916.1	813842	814120	-	279	0	2	0	2	11	8	0	0	17	68	1	4
CCNA_R0119	NC_011916.1	814045	814185	-	141	10	15	7	9	2	12	26	78	33	67	17	101
CCNA_00757	NC_011916.1	814256	815314	-	1059	4	30	1	14	1	6	6	25	28	53	4	11
CCNA_00758	NC_011916.1	815435	816001	+	567	35	69	117	174	55	99	236	441	62	141	373	503
CCNA_00759	NC_011916.1	816201	818675	-	2475	22	69	9	23	4	20	5	17	8	66	244	316
CCNA_R0120	NC_011916.1	818770	818899	+	130	0	0	0	0	0	0	0	0	0	0	0	0
CCNA_00760	NC_011916.1	818810	820510	-	1701	2	10	31	46	41	74	140	228	1	7	202	246
CCNA_00761	NC_011916.1	820655	820864	-	210	6	5	1	2	1	3	20	38	66	171	109	206
CCNA_00762	NC_011916.1	820861	821205	-	345	24	13	54	53	2	3	30	36	64	111	13	3
CCNA_00763	NC_011916.1	821210	822151	-	942	71	102	79	187	78	166	326	722	60	336	759	800
CCNA_00764	NC_011916.1	822151	822897	-	747	66	123	45	117	34	121	259	503	152	139	968	1497
CCNA_00765	NC_011916.1	823153	823443	+	291	17	19	11	25	1	18	1	4	1	2	1	4
CCNA_00766	NC_011916.1	823602	824180	-	579	8	27	20	49	36	38	0	6	3	4	0	8
CCNA_00767	NC_011916.1	824218	824421	-	204	0	2	4	9	16	26	0	0	2	0	104	80
CCNA_03936	NC_011916.1	824706	824840	+	135	0	0	2	15	11	9	0	0	0	0	0	1
CCNA_00768	NC_011916.1	824776	825000	+	225	11	2	0	2	17	34	140	134	0	0	2	0
CCNA_00769	NC_011916.1	824997	825644	+	648	33	37	85	236	30	36	82	195	121	159	466	960
CCNA_00770	NC_011916.1	825728	826336	+	609	18	5	2	8	6	28	24	41	26	62	252	236
CCNA_R0013	NC_011916.1	826839	826953	+	115	1	0	0	1	0	0	0	2	0	0	0	0
CCNA_00772	NC_011916.1	827021	827239	-	219	1	2	1	3	0	2	0	1	0	1	1	0
CCNA_00773	NC_011916.1	827458	828936	+	1479	2	15	29	68	2	17	135	187	26	74	388	609
CCNA_03937	NC_011916.1	829105	829290	+	186	1	14	3	9	2	7	1	4	0	1	0	3
CCNA_00774	NC_011916.1	829317	830426	+	1110	22	56	6	32	10	26	33	42	1	4	5	11
CCNA_00775	NC_011916.1	830436	831593	-	1158	27	47	10	18	8	16	0	4	3	11	21	54
CCNA_00776	NC_011916.1	831686	835249	-	3564	151	172	121	248	102	107	55	234	44	107	31	71
CCNA_00777	NC_011916.1	835363	837786	-	2424	53	120	83	140	6	52	24	43	91	200	102	134
CCNA_00778	NC_011916.1	837946	839778	-	1833	281	531	288	524	239	548	1769	2887	732	986	2776	4617
CCNA_R0014	NC_011916.1	840137	840219	+	83	0	0	1	0	1	1	0	0	0	0	1	2
CCNA_00779	NC_011916.1	840345	840746	+	402	13	17	2	7	0	2	33	67	1	4	79	157
CCNA_00780	NC_011916.1	840760	841686	-	927	23	54	42	79	26	38	69	82	2	5	375	390
CCNA_00781	NC_011916.1	841838	842194	+	357	22	35	5	21	12	42	24	166	74	125	997	979
CCNA_R0015	NC_011916.1	842304	842378	+	75	122	324	130	304	100	230	384	826	66	190	815	1853
CCNA_00782	NC_011916.1	842489	844108	-	1620	38	55	15	49	53	89	4	117	51	77	6	19
CCNA_R0016	NC_011916.1	844332	844401	+	70	2	1	8	24	9	17	0	0	0	1	0	0
CCNA_00783	NC_011916.1	844450	846426	-	1977	51	111	63	106	25	39	7	18	189	260	13	29
CCNA_00784	NC_011916.1	846681	847904	+	1224	16	21	58	61	21	29	26	54	5	17	17	34
CCNA_R0121	NC_011916.1	847992	848150	-	159	0	1	1	2	5	4	0	2	0	1	0	2
CCNA_00785	NC_011916.1	848157	849932	-	1776	16	41	19	44	25	52	88	184	34	66	15	39
CCNA_03938	NC_011916.1	850116	850442	-	327	4	18	34	58	2	8	2	9	52	80	50	163
CCNA_00787	NC_011916.1	850554	851420	-	867	33	50	27	51	20	17	118	199	102	151	308	342
CCNA_00788	NC_011916.1	851554	852870	+	1317	12	24	29	50	7	13	134	158	16	50	349	444
CCNA_00789	NC_011916.1	852873	853523	-	651	14	84	65	253	22	34	122	399	38	131	150	291
CCNA_00790	NC_011916.1	853699	854076	+	378	3	6	1	2	2	2	0	6	1	2	1	6
CCNA_03939	NC_011916.1	854395	854685	+	291	0	1	0	2	0	1	12	16	75	66	3	4
CCNA_00792	NC_011916.1	855026	856210	-	1185	8	10	7	12	4	9	5	131	2	5	8	12
CCNA_00793	NC_011916.1	856299	857666	+	1368	4	17	5	10	6	15	32	134	106	208	39	103
CCNA_00794	NC_011916.1	857776	858969	+	1194	24	37	21	65	27	49	50	125	3	7	6	13
CCNA_00795	NC_011916.1	858980	859588	-	609	4	7	4	36	1	26	3	56	24	41	88	206
CCNA_00796	NC_011916.1	859581	861068	-	1488	9	19	5	15	12	40	11	31	0	7	9	18
CCNA_03940	NC_011916.1	861178	861285	+	108	0	0	4	9	0	5	0	0	0	0	0	0
CCNA_00798	NC_011916.1	861294	862892	-	1599	8	23	12	30	12	27	18	24	13	18	15	46
CCNA_00799	NC_011916.1	863065	864705	-	1641	37	52	16	63	16	22	6	31	5	12	12	45
CCNA_00800	NC_011916.1	864829	866391	+	1563	8	25	117	240	31	62	149	154	2	13	580	557
CCNA_00801	NC_011916.1	866406	867557	+	1152	5	8	54	82	7	13	2	5	4	29	64	24
CCNA_00802	NC_011916.1	867576	867695	+	120	0	3	0	1	0	2	1	1	0	0	239	303
CCNA_00803	NC_011916.1	867854	868309	+	456	16	25	58	100	40	66	67	148	67	256	120	279
CCNA_00804	NC_011916.1	868374	868859	-	486	4	14	58	103	25	36	53	102	210	363	290	887
CCNA_00805	NC_011916.1	869089	869778	-	690	19	23	1	13	4	13	0	1	75	124	32	163
CCNA_00806	NC_011916.1	869778	871625	-	1848	89	224	151	308	128	224	777	1154	194	335	370	1704
CCNA_00807	NC_011916.1	871633	872082	-	450	33	41	28	39	4	13	16	137	0	1	52	55
CCNA_00808	NC_011916.1	872176	872310	-	135	14	23	24	39	15	40	0	0	25	58	28	287
CCNA_00809	NC_011916.1	872590	873585	-	996	9	13	19	29	2	10	16	68	56	144	10	14
CCNA_00810	NC_011916.1	873744	874886	-	1143	40	53	6	14	18	39	28	115	2	3	6	27
CCNA_00811	NC_011916.1	874918	875553	-	636	18	16	25	70	24	21	27	46	8	34	23	36
CCNA_00812	NC_011916.1	875775	876026	-	252	1	3	4	5	1	4	1	1	0	5	3	9
CCNA_00813	NC_011916.1	876155	877531	-	1377	6	8	26	51	23	38	4	22	1	8	10	37
CCNA_00814	NC_011916.1	877757	878080	-	324	7	9	1	18	1	7	1	2	0	3	2	2
CCNA_00815	NC_011916.1	878273	879724	-	1452	18	29	12	19	11	33	25	71	117	145	9	18
CCNA_00816	NC_011916.1	879721	879912	-	192	1	1	0	0	2	1	104	124	0	0	0	1
CCNA_00817	NC_011916.1	879956	881284	-	1329	41	88	27	53	17	50	4	16	18	148	9	16
CCNA_00818	NC_011916.1	881445	882167	-	723	0	13	10	28	3	5	141	154	0	0	57	46
CCNA_00820	NC_011916.1	882223	883395	-	1173	14	30	97	114	10	40	1	8	3	4	217	212
CCNA_00821	NC_011916.1	883440	883889	-	450	1	0	13	34	5	11	0	0	1	0	56	109
CCNA_00822	NC_011916.1	883961	884305	-	345	0	1	4	29	11	33	333	454	1	1	25	222
CCNA_00823	NC_011916.1	884441	885244	-	804	453	1006	757	1369	207	295	543	1338	398	859	516	1273
CCNA_03941	NC_011916.1	884548	884910	-	363	0	0	0	0	0	0	0	0	0	0	0	0
CCNA_00824	NC_011916.1	885326	886054	-	729	9	38	4	11	1	9	147	155	34	110	34	48
CCNA_00825	NC_011916.1	886217	886825	-	609	18	20	1	12	4	4	5	53	0	2	8	120
CCNA_00826	NC_011916.1	886822	887742	-	921	9	13	5	14	27	38	3	14	66	86	7	12
CCNA_00827	NC_011916.1	888079	891006	+	2928	61	89	28	113	20	45	31	49	79	90	665	520
CCNA_00828	NC_011916.1	891133	892647	+	1515	5	9	18	36	6	16	4	6	1	7	6	23
CCNA_R0122	NC_011916.1	892718	892861	+	144	0	1	1	1	1	0	0	0	0	1	0	1
CCNA_00830	NC_011916.1	892954	894603	+	1650	17	66	12	39	7	14	75	236	6	40	5	18
CCNA_00831	NC_011916.1	894504	897455	+	2952	23	28	46	146	9	16	31	111	7	10	222	619
CCNA_00832	NC_011916.1	897582	898481	-	900	22	39	9	18	0	4	5	8	0	1	11	21
CCNA_00833	NC_011916.1	898620	899219	+	600	23	30	3	2	0	4	0	4	2	3	5	5
CCNA_03942	NC_011916.1	899356	899490	-	135	0	0	0	0	0	0	0	0	0	1	0	0
CCNA_00834	NC_011916.1	899662	900483	+	822	173	301	242	430	156	276	548	1094	472	753	1611	2485
CCNA_R0017	NC_011916.1	900614	900704	+	91	0	2	0	0	1	2	0	0	0	0	0	0
CCNA_00835	NC_011916.1	901034	901855	+	822	79	179	126	264	107	201	225	424	321	521	952	1495
CCNA_00836	NC_011916.1	902191	903012	+	822	13	22	32	54	41	103	162	395	106	155	326	337
CCNA_00837	NC_011916.1	903123	904739	-	1617	7	28	19	31	25	36	72	109	11	8	28	45
CCNA_00838	NC_011916.1	904900	906873	-	1974	27	68	12	44	15	66	50	160	6	7	87	125
CCNA_R0204	NC_011916.1	906970	907029	+	60	2	0	4	0	4	0	6	11	1	0	1	0
CCNA_00839	NC_011916.1	907095	909575	+	2481	10	31	12	46	21	31	27	68	7	37	27	118
CCNA_00840	NC_011916.1	909868	911793	+	1926	4	19	32	51	5	23	192	212	3	12	16	63
CCNA_00841	NC_011916.1	911803	913419	-	1617	48	51	57	84	45	76	7	13	48	59	19	132
CCNA_00842	NC_011916.1	913509	915233	-	1725	17	40	2	14	9	23	5	87	2	4	9	14
CCNA_00843	NC_011916.1	915317	916645	-	1329	8	16	8	18	4	15	4	12	73	98	8	12
CCNA_00844	NC_011916.1	916721	917002	-	282	14	21	1	2	1	7	2	1	0	2	1	3
CCNA_00845	NC_011916.1	916999	917262	-	264	3	15	0	2	6	9	0	0	0	1	0	3
CCNA_00846	NC_011916.1	917301	920390	-	3090	119	294	158	308	155	305	879	1936	181	525	695	1700
CCNA_R0018	NC_011916.1	920425	920663	+	239	0	0	0	0	0	0	0	0	0	0	0	0
CCNA_03943	NC_011916.1	920475	920636	+	162	0	0	0	0	0	0	0	0	0	0	0	0
CCNA_R0019	NC_011916.1	920579	920752	-	174	49	96	46	84	49	81	161	256	29	43	197	280
CCNA_00847	NC_011916.1	920836	921303	+	468	18	14	0	7	2	3	3	9	5	150	5	3
CCNA_00848	NC_011916.1	921330	921494	-	165	0	1	0	4	0	8	1	0	0	1	0	2
CCNA_R0123	NC_011916.1	921612	921719	-	108	378	292	443	390	276	246	392	316	192	134	634	467
CCNA_00849	NC_011916.1	921731	923134	-	1404	26	48	31	102	31	62	82	148	27	83	702	1325
CCNA_00850	NC_011916.1	923136	926291	-	3156	81	232	136	369	138	241	290	1100	87	322	1238	1747
CCNA_00851	NC_011916.1	926304	927470	-	1167	17	39	24	45	36	72	132	260	67	250	82	196
CCNA_00852	NC_011916.1	927638	928252	+	615	5	27	20	33	12	9	1	6	0	7	1	4
CCNA_00853	NC_011916.1	928249	929016	-	768	2	11	4	7	13	30	2	6	50	90	399	636
CCNA_00854	NC_011916.1	929146	930738	+	1593	25	51	11	54	4	20	7	17	2	15	7	26
CCNA_00855	NC_011916.1	930735	931592	-	858	29	42	8	18	27	34	6	19	46	79	367	458
CCNA_R0205	NC_011916.1	931655	931690	+	36	0	0	0	0	1	0	0	1	0	0	0	0
CCNA_00856	NC_011916.1	931733	933355	-	1623	9	7	14	13	9	24	2	11	1	3	9	21
CCNA_00857	NC_011916.1	933527	934963	-	1437	68	126	148	243	33	58	161	195	109	125	20	26
CCNA_00858	NC_011916.1	935330	937543	+	2214	38	131	116	206	106	128	139	299	186	246	9	24
CCNA_00859	NC_011916.1	937676	938563	-	888	26	48	12	27	6	30	6	2	39	105	214	281
CCNA_00860	NC_011916.1	938619	938855	-	237	8	18	2	20	34	50	83	310	14	93	3	5
CCNA_R0124	NC_011916.1	938932	939706	+	775	0	2	2	2	0	2	0	1	0	0	0	0
CCNA_00861	NC_011916.1	938979	939557	-	579	0	0	0	0	0	0	0	0	0	0	0	0
CCNA_00862	NC_011916.1	939696	941471	-	1776	13	50	24	55	15	49	124	284	132	175	305	405
CCNA_00863	NC_011916.1	941464	942333	-	870	23	31	24	92	10	37	163	440	56	79	268	319
CCNA_00864	NC_011916.1	942458	943204	-	747	2	6	1	1	1	5	19	30	0	4	1	3
CCNA_00865	NC_011916.1	943210	944646	-	1437	1	10	14	42	8	14	3	26	1	17	9	31
CCNA_00866	NC_011916.1	944663	945817	-	1155	8	23	49	86	13	10	5	19	18	116	7	25
CCNA_00867	NC_011916.1	946004	946492	+	489	11	45	23	34	9	32	48	139	4	1	204	281
CCNA_03889	NC_011916.1	946747	947268	+	522	8	10	4	2	4	11	63	120	1	3	1	8
CCNA_00869	NC_011916.1	947426	950383	-	2958	51	82	80	105	17	72	151	292	2	10	753	785
CCNA_00870	NC_011916.1	950449	950886	-	438	1	1	6	25	5	6	48	99	42	75	153	199
CCNA_00871	NC_011916.1	950906	951757	-	852	15	45	1	14	7	35	157	120	4	2	7	14
CCNA_00872	NC_011916.1	951754	952008	-	255	0	5	19	16	23	20	0	1	0	0	0	3
CCNA_00873	NC_011916.1	952037	952834	-	798	8	17	0	3	0	9	6	7	75	102	1	7
CCNA_00874	NC_011916.1	952833	953744	+	912	27	25	25	47	36	21	51	85	32	74	29	42
CCNA_00875	NC_011916.1	953751	953924	-	174	18	21	0	2	0	0	7	13	0	2	2	5
CCNA_00876	NC_011916.1	953903	954307	-	405	1	0	14	36	6	13	93	149	0	2	200	230
CCNA_00877	NC_011916.1	954339	954947	-	609	6	14	2	5	23	32	1	2	61	84	151	291
CCNA_00878	NC_011916.1	955220	956650	+	1431	95	175	262	361	95	211	756	1714	373	973	2951	3880
CCNA_00879	NC_011916.1	956807	959071	+	2265	37	71	22	70	26	33	16	31	23	111	299	429
CCNA_00880	NC_011916.1	959391	960950	-	1560	23	25	13	34	28	27	19	151	14	39	19	265
CCNA_00881	NC_011916.1	960947	961699	-	753	2	6	3	21	6	8	2	6	0	2	1	8
CCNA_00882	NC_011916.1	961855	962853	-	999	6	11	2	7	2	11	2	11	3	2	2	17
CCNA_00883	NC_011916.1	963045	963803	-	759	10	30	44	47	1	23	1	8	0	1	1	8
CCNA_00884	NC_011916.1	963806	964192	-	387	2	9	5	10	0	1	1	2	33	57	2	1
CCNA_00885	NC_011916.1	964182	964730	-	549	10	31	2	33	17	28	92	214	37	129	0	3
CCNA_00886	NC_011916.1	964937	966184	+	1248	28	74	52	111	19	41	151	226	59	129	681	1224
CCNA_00887	NC_011916.1	966367	966831	+	465	2	18	0	4	14	18	4	50	1	8	77	227
CCNA_00888	NC_011916.1	966956	967309	+	354	1	6	19	31	14	24	8	47	49	79	32	457
CCNA_00889	NC_011916.1	967313	967756	-	444	3	6	51	62	9	9	171	253	0	3	159	293
CCNA_00890	NC_011916.1	967847	968767	-	921	3	14	83	100	2	8	118	167	8	35	18	22
CCNA_00891	NC_011916.1	968889	969827	+	939	3	15	11	18	2	7	21	117	62	156	8	6
CCNA_R0020	NC_011916.1	970059	970156	+	98	0	0	1	0	1	1	0	0	0	0	0	0
CCNA_00892	NC_011916.1	970314	972578	+	2265	67	85	51	76	32	85	87	218	20	59	108	231
CCNA_00893	NC_011916.1	972738	973802	+	1065	20	41	3	25	37	55	7	23	5	9	6	19
CCNA_00894	NC_011916.1	973984	975135	+	1152	24	63	29	73	34	46	223	315	16	76	862	1183
CCNA_00895	NC_011916.1	975146	975541	+	396	2	4	6	17	3	3	1	5	32	63	1	7
CCNA_00896	NC_011916.1	975549	975920	-	372	0	1	1	1	2	10	0	0	0	0	138	211
CCNA_00897	NC_011916.1	976013	976177	+	165	8	1	7	4	27	18	4	1	1	0	2	4
CCNA_00898	NC_011916.1	976253	977020	-	768	13	13	3	25	3	13	153	180	0	3	255	268
CCNA_00899	NC_011916.1	977024	978094	-	1071	9	36	2	11	9	23	81	209	181	260	389	331
CCNA_00900	NC_011916.1	978293	980500	+	2208	23	71	21	58	29	45	183	413	11	34	13	69
CCNA_00901	NC_011916.1	980770	981606	-	837	42	43	57	97	31	28	16	10	30	46	12	20
CCNA_00902	NC_011916.1	981935	982915	+	981	3	8	7	19	12	31	123	135	1	12	9	19
CCNA_00903	NC_011916.1	982938	984485	+	1548	20	34	4	11	19	46	28	119	3	7	7	30
CCNA_00904	NC_011916.1	984482	985480	+	999	1	12	2	17	10	18	10	11	4	12	7	7
CCNA_00905	NC_011916.1	985509	986396	-	888	1	7	0	9	5	10	4	11	0	34	257	339
CCNA_00906	NC_011916.1	986466	987380	-	915	21	41	26	48	10	23	45	60	1	8	174	393
CCNA_00907	NC_011916.1	987377	988105	-	729	30	31	9	12	23	68	1	7	1	1	0	6
CCNA_00908	NC_011916.1	988042	989181	-	1140	15	23	14	32	5	17	19	46	45	46	557	540
CCNA_00909	NC_011916.1	989266	990003	-	738	3	17	4	13	9	17	57	127	3	6	304	289
CCNA_00910	NC_011916.1	990076	991266	-	1191	3	6	5	7	8	16	5	16	2	5	8	10
CCNA_00911	NC_011916.1	991329	991919	-	591	1	3	2	5	1	6	1	11	2	2	187	251
CCNA_00912	NC_011916.1	991916	992983	-	1068	2	6	10	33	0	8	5	3	0	2	10	15
CCNA_00913	NC_011916.1	993033	993209	-	177	0	1	1	2	12	7	2	2	0	1	2	5
CCNA_00914	NC_011916.1	993288	993815	-	528	1	3	15	13	6	21	1	3	1	4	3	2
CCNA_00915	NC_011916.1	993947	994708	+	762	2	2	1	5	12	40	1	10	84	146	45	115
CCNA_00916	NC_011916.1	994709	994999	-	291	0	1	0	19	1	7	0	1	0	0	0	2
CCNA_00917	NC_011916.1	994996	995262	-	267	0	2	3	12	1	9	0	1	1	0	1	0
CCNA_00918	NC_011916.1	995336	996205	+	870	6	28	35	51	10	19	115	416	5	21	136	542
CCNA_00919	NC_011916.1	996243	996467	+	225	15	44	28	49	17	22	102	154	42	68	170	256
CCNA_00920	NC_011916.1	996464	997576	+	1113	142	247	74	149	112	273	1001	1546	340	602	897	1246
CCNA_00921	NC_011916.1	997744	998499	+	756	14	27	15	48	7	13	155	169	9	6	205	270
CCNA_00922	NC_011916.1	998598	1001177	+	2580	49	134	156	262	130	238	388	583	109	304	209	364
CCNA_00923	NC_011916.1	1001397	1001729	+	333	25	26	34	34	7	28	0	2	71	59	353	358
CCNA_00924	NC_011916.1	1001739	1002017	-	279	2	2	30	25	0	2	1	2	1	0	178	216
CCNA_00925	NC_011916.1	1002018	1002560	-	543	16	36	9	26	8	13	8	46	1	3	9	363
CCNA_00926	NC_011916.1	1002665	1003636	-	972	7	8	4	7	2	5	74	136	9	3	12	17
CCNA_00927	NC_011916.1	1003804	1004418	-	615	12	7	9	28	6	5	4	10	1	13	11	34
CCNA_00928	NC_011916.1	1004428	1005102	-	675	26	37	46	64	7	17	2	4	26	44	0	10
CCNA_00929	NC_011916.1	1005247	1006242	+	996	6	15	42	113	46	133	115	297	2	1	59	253
CCNA_00930	NC_011916.1	1006253	1006870	+	618	40	57	34	84	21	35	100	140	121	149	53	198
CCNA_00931	NC_011916.1	1006846	1008048	+	1203	24	63	59	101	72	138	324	759	9	120	240	414
CCNA_00932	NC_011916.1	1008064	1008525	+	462	12	36	8	63	17	51	186	231	3	3	3	6
CCNA_00933	NC_011916.1	1008616	1010022	+	1407	15	43	89	96	31	53	132	197	57	102	262	600
CCNA_00934	NC_011916.1	1010073	1010594	+	522	0	2	13	19	5	7	1	3	6	10	7	8
CCNA_00935	NC_011916.1	1010693	1011679	-	987	24	33	10	22	10	19	64	73	4	5	8	14
CCNA_00936	NC_011916.1	1011810	1012649	+	840	5	7	4	7	15	28	1	5	1	52	3	13
CCNA_00937	NC_011916.1	1012655	1012924	-	270	0	2	7	33	0	2	0	3	14	18	1	8
CCNA_00938	NC_011916.1	1013086	1014273	-	1188	13	31	33	46	37	57	284	319	84	113	559	836
CCNA_R0125	NC_011916.1	1014360	1014431	-	72	1	2	1	0	0	0	0	0	0	0	0	2
CCNA_00939	NC_011916.1	1014509	1015012	+	504	0	3	12	16	16	27	0	3	0	0	156	345
CCNA_00940	NC_011916.1	1015105	1017138	+	2034	45	51	19	33	10	29	5	24	4	2	100	43
CCNA_00941	NC_011916.1	1017151	1018374	-	1224	25	39	45	76	46	65	47	229	68	65	5	14
CCNA_00942	NC_011916.1	1018428	1019351	-	924	17	24	47	84	3	15	3	17	48	82	4	9
CCNA_00943	NC_011916.1	1019355	1021466	-	2112	18	40	33	85	11	11	127	144	65	92	27	94
CCNA_03944	NC_011916.1	1021470	1021586	-	117	0	0	0	0	0	0	0	0	0	0	0	1
CCNA_00944	NC_011916.1	1021867	1023069	+	1203	26	48	15	53	37	62	152	171	43	127	81	170
CCNA_00945	NC_011916.1	1022922	1023653	+	732	4	32	6	20	11	15	6	7	13	39	51	165
CCNA_00946	NC_011916.1	1023665	1024348	+	684	1	4	8	4	8	11	35	76	27	93	27	74
CCNA_00947	NC_011916.1	1024495	1026270	+	1776	135	286	106	230	94	195	599	1209	60	139	571	864
CCNA_00948	NC_011916.1	1026439	1026720	+	282	1	14	38	43	26	45	10	25	0	1	17	331
CCNA_00949	NC_011916.1	1026741	1026965	+	225	0	2	2	0	0	11	0	3	0	1	104	191
CCNA_00950	NC_011916.1	1026984	1028648	+	1665	51	78	6	57	23	54	142	328	0	4	44	468
CCNA_00951	NC_011916.1	1028648	1029670	+	1023	39	96	15	34	15	30	152	157	4	1	4	13
CCNA_00952	NC_011916.1	1029681	1030319	+	639	5	9	5	36	6	30	8	10	2	61	1	2
CCNA_00953	NC_011916.1	1030335	1030667	+	333	1	2	0	3	9	16	0	3	75	78	173	303
CCNA_00954	NC_011916.1	1030701	1032068	+	1368	36	70	43	94	15	39	6	19	57	102	57	336
CCNA_00956	NC_011916.1	1032336	1034438	+	2103	11	24	48	79	26	44	363	795	17	125	145	162
CCNA_00957	NC_011916.1	1034478	1035959	+	1482	32	50	39	56	25	41	7	15	27	85	176	305
CCNA_00958	NC_011916.1	1035956	1037278	-	1323	52	52	14	60	34	58	6	7	8	4	28	48
CCNA_00959	NC_011916.1	1037402	1038040	+	639	12	14	0	22	21	22	3	9	4	4	3	6
CCNA_00961	NC_011916.1	1038075	1038479	+	405	2	4	1	4	11	24	74	130	11	41	2	9
CCNA_00962	NC_011916.1	1038480	1038926	-	447	2	11	23	73	10	37	0	0	0	1	25	201
CCNA_00963	NC_011916.1	1038937	1039353	-	417	11	27	2	20	1	4	24	123	4	11	1	1
CCNA_00964	NC_011916.1	1039648	1039740	-	93	0	0	1	1	0	1	0	2	0	1	0	2
CCNA_00965	NC_011916.1	1039915	1040613	-	699	28	80	18	34	33	43	94	120	3	3	2	7
CCNA_00966	NC_011916.1	1040719	1041387	+	669	19	12	13	46	9	14	2	8	18	74	7	316
CCNA_00967	NC_011916.1	1041399	1042019	-	621	1	13	19	91	10	35	17	43	0	1	0	13
CCNA_00968	NC_011916.1	1042164	1043663	+	1500	23	54	81	162	18	42	95	215	12	32	3	17
CCNA_00969	NC_011916.1	1044122	1045882	-	1761	13	25	11	28	4	19	2	16	0	4	12	32
CCNA_00970	NC_011916.1	1046120	1049140	+	3021	31	124	48	83	60	120	505	842	66	151	146	232
CCNA_00971	NC_011916.1	1049148	1050041	-	894	21	72	19	52	4	21	2	11	22	79	406	486
CCNA_00972	NC_011916.1	1050224	1050370	+	147	0	0	0	2	0	0	0	0	0	1	1	3
CCNA_00973	NC_011916.1	1050375	1050782	-	408	13	6	16	33	7	25	104	142	6	48	3	7
CCNA_00974	NC_011916.1	1051388	1054555	+	3168	109	315	197	471	105	228	1048	1574	331	570	1106	1897
CCNA_00976	NC_011916.1	1055002	1056786	-	1785	54	106	41	129	41	92	463	681	198	355	1198	1422
CCNA_R0021	NC_011916.1	1056960	1057036	-	77	2	5	30	57	12	38	34	52	30	73	4	51
CCNA_R0022	NC_011916.1	1057201	1057274	+	74	54	121	108	177	51	101	151	383	52	165	234	546
CCNA_00977	NC_011916.1	1057369	1057779	+	411	0	3	11	22	10	16	0	2	0	0	108	229
CCNA_00978	NC_011916.1	1057794	1058162	+	369	8	9	0	0	0	4	0	0	11	26	0	0
CCNA_00979	NC_011916.1	1058314	1059390	+	1077	16	38	6	29	5	14	113	277	4	6	183	380
CCNA_00980	NC_011916.1	1059395	1060600	+	1206	23	39	25	50	19	36	77	215	11	85	33	66
CCNA_00981	NC_011916.1	1060597	1061301	+	705	22	19	3	3	15	17	0	1	1	0	1	8
CCNA_00982	NC_011916.1	1061622	1062050	+	429	4	24	8	34	3	8	7	206	54	64	1	7
CCNA_00983	NC_011916.1	1062171	1063988	-	1818	3	10	21	103	16	23	9	9	5	11	8	19
CCNA_00984	NC_011916.1	1064062	1064613	-	552	11	20	1	10	28	47	6	9	68	129	289	625
CCNA_00985	NC_011916.1	1064610	1066802	-	2193	21	56	84	133	44	74	399	742	17	106	11	40
CCNA_00986	NC_011916.1	1066823	1067782	+	960	30	50	6	12	1	7	58	87	24	57	11	23
CCNA_00987	NC_011916.1	1067843	1068046	+	204	1	1	0	25	0	12	0	0	51	85	0	1
CCNA_00988	NC_011916.1	1068127	1069569	-	1443	9	32	22	51	5	23	1	10	2	8	8	25
CCNA_00989	NC_011916.1	1069657	1071558	+	1902	2	10	16	41	20	36	10	18	2	4	152	227
CCNA_00990	NC_011916.1	1071582	1072052	-	471	9	5	0	3	5	17	10	19	0	0	1	9
CCNA_00991	NC_011916.1	1072114	1072560	-	447	2	2	0	3	9	19	144	124	9	29	75	176
CCNA_00992	NC_011916.1	1072625	1073638	-	1014	14	31	2	7	5	5	9	33	2	3	4	6
CCNA_00993	NC_011916.1	1073710	1075248	-	1539	5	8	11	21	9	19	5	14	5	3	13	26
CCNA_00994	NC_011916.1	1075409	1077076	-	1668	53	68	18	32	13	37	15	22	26	36	111	269
CCNA_00995	NC_011916.1	1077242	1078576	+	1335	12	32	34	57	26	69	39	100	11	16	259	230
CCNA_00996	NC_011916.1	1078807	1079691	+	885	2	9	17	17	0	5	0	8	1	3	10	13
CCNA_00997	NC_011916.1	1079915	1081138	+	1224	7	21	36	68	31	54	8	8	103	92	12	14
CCNA_R0126	NC_011916.1	1080923	1081336	-	414	1	0	8	25	0	0	0	0	0	0	0	0
CCNA_00998	NC_011916.1	1081367	1081786	+	420	58	89	48	60	60	110	75	147	189	430	563	808
CCNA_00999	NC_011916.1	1081984	1082481	+	498	5	14	0	4	16	25	0	5	0	3	1	6
CCNA_01000	NC_011916.1	1082537	1082725	+	189	0	0	0	0	0	2	1	12	1	0	0	0
CCNA_01001	NC_011916.1	1083029	1083940	-	912	6	70	3	18	34	32	88	197	3	19	95	510
CCNA_01002	NC_011916.1	1083961	1084761	-	801	5	3	60	90	19	62	279	440	17	66	3	6
CCNA_01003	NC_011916.1	1084761	1085081	-	321	4	23	15	31	30	28	230	288	0	1	3	2
CCNA_01004	NC_011916.1	1085196	1085639	+	444	7	5	8	31	1	2	1	1	0	3	2	5
CCNA_01005	NC_011916.1	1085652	1086071	+	420	2	11	10	15	6	5	69	148	0	1	395	593
CCNA_01006	NC_011916.1	1086082	1086393	+	312	15	17	0	0	0	3	15	46	0	1	118	109
CCNA_01007	NC_011916.1	1086496	1086663	-	168	2	3	27	26	0	0	0	2	37	68	1	3
CCNA_01008	NC_011916.1	1086800	1088464	-	1665	25	38	42	44	53	93	227	446	2	6	456	1373
CCNA_01009	NC_011916.1	1088589	1089404	-	816	10	30	56	104	39	68	87	127	1	1	5	8
CCNA_01010	NC_011916.1	1089523	1091064	-	1542	50	100	57	69	36	97	268	594	69	151	448	1236
CCNA_01011	NC_011916.1	1091049	1092254	-	1206	22	48	13	27	25	67	386	548	9	63	7	25
CCNA_01012	NC_011916.1	1092339	1093718	+	1380	20	31	11	36	39	50	240	332	42	88	8	64
CCNA_01013	NC_011916.1	1093715	1094422	+	708	8	6	5	28	21	40	70	169	41	61	7	30
CCNA_R0023	NC_011916.1	1094451	1094527	-	77	104	199	94	175	63	92	240	416	63	197	167	279
CCNA_01014	NC_011916.1	1094791	1095267	-	477	4	17	19	23	15	21	0	1	0	2	1	1
CCNA_01015	NC_011916.1	1095313	1096998	+	1686	19	69	17	154	30	42	170	374	10	63	531	566
CCNA_01016	NC_011916.1	1096995	1097903	+	909	17	28	9	10	1	6	65	132	1	3	6	7
CCNA_01017	NC_011916.1	1098179	1099771	+	1593	11	9	8	19	6	30	58	77	18	39	191	342
CCNA_01018	NC_011916.1	1099898	1100821	-	924	5	22	16	54	10	30	2	9	0	3	3	10
CCNA_R0127	NC_011916.1	1100899	1101052	-	154	0	1	5	19	0	0	0	0	0	0	0	0
CCNA_01019	NC_011916.1	1100992	1103268	-	2277	11	10	21	51	10	34	6	16	49	125	12	17
CCNA_01020	NC_011916.1	1103332	1104375	-	1044	2	4	1	27	3	6	89	175	95	92	3	13
CCNA_01021	NC_011916.1	1105026	1108139	+	3114	9	27	20	63	19	42	3	131	46	96	100	248
CCNA_01022	NC_011916.1	1108366	1109898	+	1533	14	26	4	9	4	17	2	11	14	25	350	275
CCNA_01023	NC_011916.1	1109908	1111458	+	1551	4	15	16	38	10	18	3	14	46	66	9	12
CCNA_01024	NC_011916.1	1111617	1112111	-	495	27	51	22	32	13	30	83	98	54	123	0	5
CCNA_01025	NC_011916.1	1112124	1112747	-	624	8	48	6	31	36	62	151	358	62	124	450	876
CCNA_01026	NC_011916.1	1112731	1113450	-	720	33	46	87	114	83	143	258	401	265	334	172	509
CCNA_01027	NC_011916.1	1113648	1114013	-	366	8	10	1	1	18	20	33	144	73	60	4	3
CCNA_01028	NC_011916.1	1114031	1115644	+	1614	34	100	62	148	90	136	208	462	12	21	137	320
CCNA_01029	NC_011916.1	1115733	1118816	-	3084	36	71	84	155	58	95	72	246	72	95	17	49
CCNA_01030	NC_011916.1	1118884	1119501	-	618	2	3	3	6	3	2	2	8	15	39	109	156
CCNA_01031	NC_011916.1	1119701	1121353	+	1653	15	21	7	9	7	10	21	29	0	2	7	11
CCNA_01032	NC_011916.1	1121440	1122033	+	594	52	45	11	30	8	17	143	124	33	48	8	20
CCNA_01033	NC_011916.1	1121997	1122992	+	996	17	30	3	10	9	33	14	233	3	4	3	10
CCNA_R0128	NC_011916.1	1123037	1123071	-	35	0	1	0	0	0	1	0	0	0	2	0	1
CCNA_01034	NC_011916.1	1123256	1126540	+	3285	163	292	169	369	168	355	185	511	414	1158	2150	4316
CCNA_01035	NC_011916.1	1126541	1128433	+	1893	50	127	8	21	26	52	729	874	132	176	652	652
CCNA_R0129	NC_011916.1	1128325	1128505	+	181	0	1	0	0	0	1	0	0	1	5	1	1
CCNA_01036	NC_011916.1	1129199	1132048	-	2850	23	56	55	121	12	46	6	21	2	18	257	442
CCNA_01037	NC_011916.1	1132130	1132891	-	762	6	4	39	70	14	32	0	7	7	67	253	338
CCNA_01038	NC_011916.1	1132998	1133387	-	390	0	1	47	94	1	11	0	4	1	0	478	579
CCNA_01039	NC_011916.1	1133616	1134932	+	1317	1	9	5	10	11	18	4	11	23	88	9	17
CCNA_01040	NC_011916.1	1134929	1136569	+	1641	2	10	7	22	7	22	110	116	0	5	120	162
CCNA_01041	NC_011916.1	1136570	1136704	-	135	0	0	4	5	0	0	0	2	0	0	0	1
CCNA_R0130	NC_011916.1	1136823	1136907	-	85	0	1	1	1	0	0	0	1	0	0	0	0
CCNA_01042	NC_011916.1	1137267	1139762	-	2496	44	68	42	125	76	131	250	411	83	190	434	930
CCNA_01043	NC_011916.1	1139759	1139944	-	186	1	13	18	32	3	13	0	2	0	1	166	145
CCNA_01044	NC_011916.1	1140124	1140756	+	633	0	2	7	52	0	5	1	47	1	0	8	7
CCNA_01045	NC_011916.1	1140749	1141093	-	345	2	4	6	38	1	14	92	161	2	1	4	3
CCNA_01046	NC_011916.1	1141093	1141746	-	654	1	8	77	73	12	27	181	267	3	76	3	9
CCNA_R0024	NC_011916.1	1141901	1141990	+	90	154	311	133	358	152	329	278	704	108	222	399	691
CCNA_01047	NC_011916.1	1142237	1144948	+	2712	26	83	43	128	38	67	12	25	4	6	326	242
CCNA_01048	NC_011916.1	1145106	1145369	+	264	0	8	2	3	1	3	39	120	0	1	0	2
CCNA_03945	NC_011916.1	1145454	1145606	+	153	0	1	1	6	1	1	0	0	0	0	155	293
CCNA_01049	NC_011916.1	1145672	1146154	+	483	1	4	3	4	8	17	23	34	22	51	124	129
CCNA_01050	NC_011916.1	1146283	1147911	+	1629	24	40	23	41	35	87	116	316	60	80	157	202
CCNA_01051	NC_011916.1	1148357	1151464	+	3108	35	86	63	137	24	35	54	59	16	48	27	193
CCNA_01052	NC_011916.1	1151554	1152276	+	723	0	3	3	4	2	10	1	7	76	128	2	9
CCNA_01053	NC_011916.1	1152201	1153307	+	1107	14	36	10	20	2	15	4	13	2	8	2	7
CCNA_01054	NC_011916.1	1153331	1154830	+	1500	11	30	18	44	9	17	8	67	8	8	5	8
CCNA_01055	NC_011916.1	1154844	1156148	-	1305	9	54	14	60	39	60	129	201	0	9	2	21
CCNA_01056	NC_011916.1	1156159	1157466	-	1308	27	55	89	156	28	49	54	102	86	81	9	100
CCNA_01057	NC_011916.1	1157551	1159047	-	1497	39	81	40	56	27	80	372	520	167	287	20	67
CCNA_01058	NC_011916.1	1159130	1159429	-	300	3	2	1	2	8	35	0	2	64	86	172	914
CCNA_01059	NC_011916.1	1159693	1162773	+	3081	9179	16641	10259	19478	11268	20673	57874	109344	19013	37091	71450	117875
CCNA_01060	NC_011916.1	1163016	1164752	+	1737	134	189	172	202	77	119	338	677	552	792	1525	1698
CCNA_01061	NC_011916.1	1164820	1166130	+	1311	37	111	26	92	65	122	305	600	161	450	239	642
CCNA_01062	NC_011916.1	1166270	1167247	+	978	32	46	48	104	43	66	39	287	3	4	1	12
CCNA_01063	NC_011916.1	1167247	1167894	+	648	4	21	10	16	18	56	189	276	3	5	11	305
CCNA_01064	NC_011916.1	1167891	1169006	+	1116	50	20	38	87	31	64	57	197	4	55	316	254
CCNA_01065	NC_011916.1	1169010	1170047	+	1038	5	37	31	77	17	46	1	5	0	2	3	13
CCNA_01066	NC_011916.1	1170058	1171095	+	1038	25	40	16	31	15	43	7	7	3	7	5	11
CCNA_01067	NC_011916.1	1171152	1172735	+	1584	8	53	66	111	17	32	20	161	81	131	454	581
CCNA_01068	NC_011916.1	1172841	1174130	-	1290	46	76	17	45	41	64	2	11	52	94	8	13
CCNA_01069	NC_011916.1	1174284	1175819	+	1536	28	41	20	127	39	107	35	117	76	208	6	26
CCNA_R0025	NC_011916.1	1175968	1176304	+	337	3	12	1	3	14	35	0	0	0	0	0	1
CCNA_R0131	NC_011916.1	1176250	1176311	+	62	0	0	0	0	0	0	0	0	0	0	0	0
CCNA_01070	NC_011916.1	1176508	1177257	-	750	1	38	13	29	5	24	1	5	0	2	4	9
CCNA_01071	NC_011916.1	1177299	1178732	-	1434	6	20	15	27	23	24	14	49	3	5	6	10
CCNA_01072	NC_011916.1	1178906	1179061	-	156	0	2	0	1	1	0	0	0	1	0	0	3
CCNA_01073	NC_011916.1	1179165	1179557	-	393	2	11	3	4	10	16	0	3	58	172	3	3
CCNA_01074	NC_011916.1	1179617	1179754	-	138	0	0	1	2	1	2	0	0	46	113	3	6
CCNA_01075	NC_011916.1	1179849	1180265	-	417	5	35	42	69	3	4	180	456	1	36	0	4
CCNA_01076	NC_011916.1	1180276	1180887	-	612	13	24	45	71	17	19	2	124	18	38	252	817
CCNA_01077	NC_011916.1	1180973	1183075	-	2103	37	58	105	114	23	51	9	12	38	56	409	174
CCNA_01078	NC_011916.1	1183239	1183991	+	753	13	10	25	39	15	18	1	18	41	45	7	16
CCNA_01079	NC_011916.1	1184014	1184190	-	177	2	0	0	1	0	7	140	182	1	3	4	4
CCNA_01080	NC_011916.1	1184254	1184817	+	564	17	32	5	7	49	40	0	6	14	21	140	299
CCNA_01081	NC_011916.1	1184863	1185642	+	780	13	21	43	67	7	31	3	10	2	5	5	17
CCNA_01082	NC_011916.1	1185664	1186698	-	1035	2	8	5	9	8	25	69	148	5	7	11	26
CCNA_01083	NC_011916.1	1186885	1188876	+	1992	53	82	110	206	43	150	131	345	189	247	1	8
CCNA_01084	NC_011916.1	1188873	1190108	+	1236	36	93	18	28	43	66	121	205	96	187	165	194
CCNA_01085	NC_011916.1	1190105	1191112	-	1008	37	51	46	72	16	26	214	339	34	89	2	6
CCNA_01086	NC_011916.1	1191305	1193113	-	1809	79	128	149	223	87	176	107	368	104	313	140	844
CCNA_01087	NC_011916.1	1193276	1193992	+	717	45	63	6	18	25	28	186	335	13	33	12	16
CCNA_01088	NC_011916.1	1194028	1194555	-	528	10	19	63	103	10	42	97	75	28	39	100	139
CCNA_01089	NC_011916.1	1194604	1196295	-	1692	8	21	45	69	12	32	4	13	44	65	11	31
CCNA_01090	NC_011916.1	1196289	1197659	-	1371	28	47	22	63	19	23	65	181	74	83	493	375
CCNA_01091	NC_011916.1	1197735	1198325	-	591	3	38	0	5	19	44	2	3	1	2	70	213
CCNA_01092	NC_011916.1	1198379	1198681	-	303	13	24	0	5	2	27	1	6	0	1	2	6
CCNA_01093	NC_011916.1	1198666	1198962	-	297	20	55	1	1	7	16	0	4	38	69	1	1
CCNA_01094	NC_011916.1	1199089	1199238	-	150	5	17	7	27	8	16	0	2	1	75	0	2
CCNA_01095	NC_011916.1	1199533	1201932	-	2400	53	164	134	265	97	229	619	962	175	309	1193	1605
CCNA_01096	NC_011916.1	1202090	1203163	-	1074	121	214	139	208	131	146	237	617	169	614	416	784
CCNA_01097	NC_011916.1	1203412	1203768	-	357	95	170	143	332	115	198	352	803	240	388	1020	1289
CCNA_01098	NC_011916.1	1203784	1203984	-	201	69	127	52	143	97	187	354	623	98	156	495	812
CCNA_01099	NC_011916.1	1204106	1205296	-	1191	2	12	1	11	4	15	4	11	10	49	4	14
CCNA_01100	NC_011916.1	1205363	1207291	-	1929	29	52	34	50	26	45	99	240	66	151	5	24
CCNA_01101	NC_011916.1	1207424	1207945	-	522	90	246	109	250	161	241	664	1683	199	385	665	871
CCNA_01102	NC_011916.1	1208217	1208816	+	600	2	2	1	3	1	6	6	4	2	2	4	9
CCNA_01103	NC_011916.1	1208972	1209943	-	972	16	22	5	13	6	7	3	8	95	120	586	714
CCNA_01104	NC_011916.1	1209940	1211112	-	1173	25	53	31	43	3	16	8	47	61	174	135	336
CCNA_01105	NC_011916.1	1211168	1212040	+	873	28	38	24	74	2	46	34	177	1	2	6	10
CCNA_01106	NC_011916.1	1212099	1212368	+	270	0	11	1	1	11	13	0	2	61	66	53	356
CCNA_01107	NC_011916.1	1212372	1212590	+	219	0	0	3	21	0	2	0	1	1	0	0	1
CCNA_01108	NC_011916.1	1212651	1213511	-	861	23	28	19	38	8	21	4	10	3	4	242	443
CCNA_R0026	NC_011916.1	1213683	1213757	+	75	113	230	114	279	95	206	179	449	69	111	416	849
CCNA_R0027	NC_011916.1	1213808	1213882	+	75	92	232	106	265	98	181	197	441	56	141	410	902
CCNA_01109	NC_011916.1	1213981	1215771	+	1791	18	58	32	82	24	74	158	414	177	405	5	22
CCNA_01110	NC_011916.1	1215774	1216700	+	927	5	9	5	4	10	15	1	9	0	8	1	16
CCNA_01111	NC_011916.1	1217028	1217396	+	369	8	22	0	1	2	10	0	3	1	0	8	20
CCNA_01112	NC_011916.1	1217396	1218130	+	735	3	5	2	6	5	6	4	10	19	16	28	151
CCNA_01113	NC_011916.1	1218139	1219086	-	948	21	21	2	10	18	22	3	15	2	1	347	272
CCNA_01114	NC_011916.1	1219079	1219504	-	426	0	0	21	74	0	2	4	9	0	5	1	7
CCNA_01115	NC_011916.1	1219547	1220338	-	792	4	9	5	14	3	8	1	6	2	1	3	8
CCNA_01116	NC_011916.1	1220535	1222292	+	1758	26	80	56	60	20	60	329	412	42	131	13	34
CCNA_01117	NC_011916.1	1222305	1223195	-	891	10	24	2	11	15	42	38	167	2	7	1	17
CCNA_01118	NC_011916.1	1223264	1223593	+	330	7	17	1	3	0	2	23	63	0	1	0	6
CCNA_01119	NC_011916.1	1223722	1224102	+	381	1	17	9	19	3	8	61	136	2	2	0	4
CCNA_01120	NC_011916.1	1224190	1224321	-	132	0	0	0	2	0	2	103	110	1	2	2	1
CCNA_01121	NC_011916.1	1224493	1226007	+	1515	15	37	41	43	15	72	66	111	96	150	95	247
CCNA_01122	NC_011916.1	1226141	1227676	+	1536	27	121	16	89	32	42	36	105	29	78	48	116
CCNA_01123	NC_011916.1	1227687	1229291	+	1605	43	95	50	131	32	97	245	404	85	64	15	207
CCNA_01124	NC_011916.1	1229340	1230383	-	1044	19	44	2	6	1	6	2	6	3	3	2	15
CCNA_01125	NC_011916.1	1230748	1231227	-	480	4	5	4	10	4	8	3	5	0	2	7	23
CCNA_03890	NC_011916.1	1231609	1232988	+	1380	23	22	36	36	6	20	1	24	3	8	265	319
CCNA_01128	NC_011916.1	1233054	1233356	+	303	2	4	0	3	0	0	1	3	2	34	0	2
CCNA_01129	NC_011916.1	1233504	1233770	+	267	0	1	5	3	0	1	62	73	0	2	2	2
CCNA_01130	NC_011916.1	1233785	1234540	+	756	2	4	1	4	13	31	78	86	1	0	1	7
CCNA_01131	NC_011916.1	1234550	1235635	+	1086	3	14	29	35	12	21	143	224	79	180	87	572
CCNA_01132	NC_011916.1	1235738	1237813	+	2076	52	87	91	190	74	111	284	461	38	136	182	167
CCNA_01133	NC_011916.1	1237868	1238398	-	531	0	3	1	12	0	3	0	3	0	1	5	6
CCNA_01134	NC_011916.1	1238520	1238933	-	414	0	2	6	20	1	9	7	104	0	0	0	2
CCNA_01135	NC_011916.1	1238972	1239289	-	318	5	17	1	1	8	14	0	3	12	54	0	4
CCNA_01136	NC_011916.1	1239400	1240290	-	891	4	35	2	10	4	13	4	7	3	5	5	10
CCNA_01137	NC_011916.1	1240347	1240868	-	522	1	4	2	20	3	8	4	137	1	1	2	5
CCNA_01138	NC_011916.1	1240937	1241314	+	378	1	11	1	4	3	6	15	40	1	2	0	3
CCNA_01139	NC_011916.1	1241418	1243241	+	1824	48	109	86	123	51	113	361	622	59	146	272	541
CCNA_01140	NC_011916.1	1243292	1244899	-	1608	28	63	57	66	23	30	591	704	0	11	7	20
CCNA_01141	NC_011916.1	1245163	1246233	+	1071	127	304	115	201	201	330	544	854	110	259	1267	2125
CCNA_R0132	NC_011916.1	1246251	1246366	+	116	0	1	0	3	2	4	2	2	0	0	276	265
CCNA_01142	NC_011916.1	1246920	1247396	+	477	1	1	0	1	5	17	1	1	17	31	0	1
CCNA_R0133	NC_011916.1	1247598	1247664	-	67	0	3	0	0	0	0	0	0	0	0	0	1
CCNA_01143	NC_011916.1	1247757	1248239	-	483	34	67	5	44	5	10	31	81	64	62	35	150
CCNA_01144	NC_011916.1	1248269	1248661	-	393	0	4	9	20	6	17	1	4	0	2	0	13
CCNA_01145	NC_011916.1	1248684	1250288	-	1605	17	22	12	33	7	8	97	143	6	15	195	224
CCNA_01147	NC_011916.1	1250554	1251102	+	549	0	2	2	8	2	6	1	7	21	67	1	8
CCNA_01148	NC_011916.1	1251192	1251368	+	177	7	16	1	1	0	2	0	1	1	0	0	1
CCNA_01149	NC_011916.1	1251371	1254007	-	2637	7	26	26	63	7	44	6	11	9	24	212	322
CCNA_03891	NC_011916.1	1254289	1254639	-	351	0	5	2	8	29	37	35	131	84	149	673	580
CCNA_01151	NC_011916.1	1254720	1255703	+	984	10	18	30	45	12	45	8	6	2	7	6	20
CCNA_01152	NC_011916.1	1255714	1256535	+	822	12	26	104	129	6	31	6	6	3	12	7	14
CCNA_01153	NC_011916.1	1256537	1257817	+	1281	18	32	8	17	17	38	3	13	2	5	7	25
CCNA_01154	NC_011916.1	1257902	1258591	+	690	23	33	6	22	20	29	37	86	6	178	31	300
CCNA_01155	NC_011916.1	1258877	1261810	+	2934	200	421	184	406	228	356	969	1896	388	817	660	2760
CCNA_01156	NC_011916.1	1261886	1262671	+	786	22	28	18	48	11	22	10	106	65	133	4	8
CCNA_01157	NC_011916.1	1262857	1264356	+	1500	56	109	113	176	52	102	20	93	24	79	154	322
CCNA_03999	NC_011916.1	1264353	1264796	+	444	0	9	3	8	12	18	121	314	0	3	5	5
CCNA_01158	NC_011916.1	1264793	1266709	+	1917	13	24	42	49	9	16	12	24	3	9	385	362
CCNA_03946	NC_011916.1	1266917	1266961	+	45	0	0	0	0	0	0	0	13	0	0	0	0
CCNA_01159	NC_011916.1	1266958	1268313	+	1356	5	13	14	13	12	44	55	71	2	7	290	416
CCNA_01161	NC_011916.1	1268520	1269866	+	1347	14	46	24	50	6	12	4	83	0	11	223	238
CCNA_01162	NC_011916.1	1269938	1272241	+	2304	56	81	48	98	36	118	241	441	21	60	234	682
CCNA_01163	NC_011916.1	1272589	1280028	+	7440	185	317	376	575	271	418	1279	2075	728	1142	3123	3659
CCNA_01164	NC_011916.1	1280183	1282201	+	2019	21	44	25	109	12	52	63	183	9	38	20	28
CCNA_01165	NC_011916.1	1282180	1284618	+	2439	22	42	25	89	32	60	224	655	2	11	8	21
CCNA_01166	NC_011916.1	1284624	1285421	-	798	11	17	6	12	9	7	0	9	0	4	2	17
CCNA_01167	NC_011916.1	1285421	1286584	-	1164	9	14	3	7	2	10	3	7	1	3	5	9
CCNA_01168	NC_011916.1	1286584	1287783	-	1200	17	26	26	38	7	12	5	83	1	2	21	157
CCNA_01169	NC_011916.1	1287879	1288691	-	813	2	6	0	9	2	28	1	7	1	2	330	373
CCNA_01170	NC_011916.1	1288710	1291355	-	2646	23	43	28	82	40	74	53	262	82	111	485	888
CCNA_R0028	NC_011916.1	1291593	1291668	-	76	34	83	27	98	38	65	54	128	13	77	363	473
CCNA_01171	NC_011916.1	1291753	1292091	+	339	4	10	0	4	0	10	0	1	0	1	1	7
CCNA_01172	NC_011916.1	1292202	1293044	+	843	40	90	97	252	50	145	379	696	57	62	433	771
CCNA_01173	NC_011916.1	1293181	1293510	-	330	4	9	6	7	4	2	2	3	47	45	370	323
CCNA_01174	NC_011916.1	1293570	1294526	-	957	6	51	2	37	3	31	9	50	37	56	189	276
CCNA_R0134	NC_011916.1	1294595	1294669	+	75	0	0	0	0	0	1	0	0	1	0	0	0
CCNA_01175	NC_011916.1	1294712	1295635	+	924	9	34	37	37	11	15	155	144	13	47	4	9
CCNA_01176	NC_011916.1	1295632	1295991	+	360	3	20	4	24	2	14	87	138	0	0	2	2
CCNA_01177	NC_011916.1	1295998	1297656	+	1659	32	72	5	13	51	73	116	124	3	5	70	168
CCNA_01178	NC_011916.1	1297640	1298146	+	507	1	5	2	1	2	15	2	2	1	1	0	6
CCNA_01179	NC_011916.1	1298146	1298880	+	735	16	18	28	63	11	12	41	138	1	1	1	5
CCNA_01180	NC_011916.1	1299008	1301185	-	2178	17	60	22	68	40	98	155	210	0	3	57	198
CCNA_01181	NC_011916.1	1301278	1301802	-	525	11	24	26	57	46	53	165	216	1	1	316	342
CCNA_01182	NC_011916.1	1301993	1302586	+	594	7	44	6	8	3	2	1	1	24	31	433	662
CCNA_01183	NC_011916.1	1302605	1303633	+	1029	30	81	47	220	82	111	5	9	11	127	596	666
CCNA_01184	NC_011916.1	1303641	1304087	+	447	6	10	73	100	5	15	93	337	135	108	23	304
CCNA_01185	NC_011916.1	1304093	1304443	-	351	1	3	24	35	2	2	1	0	1	1	219	198
CCNA_01186	NC_011916.1	1304705	1305016	+	312	3	33	4	27	26	89	133	545	46	118	233	298
CCNA_01187	NC_011916.1	1305189	1305740	+	552	18	15	14	35	7	11	1	3	85	292	1	3
CCNA_01188	NC_011916.1	1305737	1306660	+	924	2	4	30	72	17	46	0	17	3	6	3	11
CCNA_01189	NC_011916.1	1306766	1309666	+	2901	17	56	25	76	12	72	19	85	81	141	12	29
CCNA_01190	NC_011916.1	1309772	1311301	+	1530	18	31	28	41	43	92	81	149	132	196	393	555
CCNA_01191	NC_011916.1	1311323	1312558	-	1236	6	10	23	123	22	21	80	110	4	3	17	21
CCNA_01192	NC_011916.1	1312555	1313478	-	924	2	20	1	12	11	26	6	18	3	4	3	9
CCNA_01193	NC_011916.1	1313460	1315289	-	1830	7	27	22	48	7	24	8	143	7	80	8	30
CCNA_R0135	NC_011916.1	1315307	1315381	-	75	0	1	0	2	0	3	0	1	0	0	0	0
CCNA_01194	NC_011916.1	1315500	1317953	-	2454	24	40	45	69	38	58	14	42	115	270	334	677
CCNA_01195	NC_011916.1	1318104	1319129	-	1026	8	26	10	24	28	34	1	3	1	4	4	10
CCNA_01196	NC_011916.1	1319269	1321248	+	1980	40	54	20	78	12	60	64	87	112	142	255	548
CCNA_01197	NC_011916.1	1321300	1321470	-	171	0	0	1	3	0	2	0	3	29	62	0	2
CCNA_01198	NC_011916.1	1321668	1322570	+	903	20	28	1	3	16	13	21	122	0	2	2	7
CCNA_01199	NC_011916.1	1322567	1323436	+	870	9	26	17	52	14	35	100	276	47	71	270	485
CCNA_01200	NC_011916.1	1323479	1325734	-	2256	7	24	17	112	17	45	8	12	17	40	39	105
CCNA_01201	NC_011916.1	1325802	1326326	-	525	1	19	0	3	3	8	1	4	22	54	1	4
CCNA_01202	NC_011916.1	1326323	1328746	-	2424	61	111	62	65	82	117	234	401	48	213	1131	1181
CCNA_01203	NC_011916.1	1328834	1330816	-	1983	25	56	15	36	10	28	8	27	4	5	3	20
CCNA_01204	NC_011916.1	1330891	1331838	-	948	5	12	25	37	8	7	5	2	6	4	2	10
CCNA_01205	NC_011916.1	1331972	1332958	+	987	7	4	12	27	15	12	1	10	3	3	3	16
CCNA_01206	NC_011916.1	1332960	1333697	+	738	3	3	3	7	2	9	3	8	7	6	267	447
CCNA_01207	NC_011916.1	1333694	1334875	+	1182	3	10	20	56	12	28	2	8	0	5	2	16
CCNA_01208	NC_011916.1	1334872	1335477	+	606	3	10	2	8	2	7	1	2	1	2	3	9
CCNA_01209	NC_011916.1	1335487	1336638	+	1152	39	53	31	47	9	20	91	111	15	59	294	414
CCNA_01210	NC_011916.1	1336864	1337625	+	762	15	28	31	53	25	28	101	295	1	1	374	244
CCNA_01211	NC_011916.1	1337787	1338662	-	876	4	11	32	38	3	13	76	180	9	66	13	221
CCNA_01212	NC_011916.1	1338566	1339720	-	1155	21	51	17	36	22	47	5	98	4	9	600	687
CCNA_01213	NC_011916.1	1339720	1340781	-	1062	6	30	14	54	37	64	68	112	22	62	27	279
CCNA_01214	NC_011916.1	1340778	1341998	-	1221	11	44	21	33	24	31	76	135	2	89	148	428
CCNA_01215	NC_011916.1	1341995	1342432	-	438	12	19	43	57	2	11	350	500	65	87	4	10
CCNA_01216	NC_011916.1	1342538	1343455	-	918	12	26	5	12	4	12	1	9	3	6	8	12
CCNA_01217	NC_011916.1	1343532	1344659	+	1128	133	153	56	124	81	141	240	632	226	374	379	489
CCNA_01218	NC_011916.1	1344578	1345570	+	993	35	117	2	9	9	37	41	82	52	57	295	579
CCNA_01219	NC_011916.1	1345567	1346448	+	882	22	28	8	21	13	36	139	149	49	63	226	335
CCNA_01220	NC_011916.1	1346517	1347731	-	1215	92	158	74	159	130	265	764	1514	238	426	166	503
CCNA_01221	NC_011916.1	1347735	1347995	-	261	61	68	47	69	87	87	25	58	10	13	260	261
CCNA_01222	NC_011916.1	1348063	1349016	-	954	54	97	9	29	20	37	40	62	17	41	7	10
CCNA_01223	NC_011916.1	1349006	1350724	-	1719	62	95	38	96	31	103	103	140	84	301	186	482
CCNA_01224	NC_011916.1	1350729	1352060	-	1332	30	34	13	16	42	48	3	7	114	139	7	35
CCNA_01225	NC_011916.1	1352057	1353184	-	1128	19	32	14	20	18	66	3	11	16	81	2	9
CCNA_01226	NC_011916.1	1353186	1353818	-	633	22	69	42	110	37	68	5	15	21	42	8	22
CCNA_01227	NC_011916.1	1353981	1355048	+	1068	5	48	19	26	1	10	2	9	128	154	216	398
CCNA_01228	NC_011916.1	1355045	1355674	+	630	1	0	5	5	6	11	3	8	0	1	1	2
CCNA_01229	NC_011916.1	1355671	1357023	-	1353	8	21	9	14	10	16	84	279	13	69	18	51
CCNA_01230	NC_011916.1	1357095	1358750	+	1656	25	40	5	13	2	5	1	9	0	5	2	36
CCNA_01231	NC_011916.1	1358738	1359754	+	1017	4	28	10	19	10	37	3	6	10	30	328	313
CCNA_R0136	NC_011916.1	1359047	1359132	+	86	0	0	0	0	0	0	0	0	0	0	0	0
CCNA_01232	NC_011916.1	1359759	1360238	-	480	1	1	0	3	5	4	1	1	38	72	1	3
CCNA_01233	NC_011916.1	1360253	1361161	-	909	2	2	18	47	5	7	0	3	0	3	141	219
CCNA_01234	NC_011916.1	1361248	1362339	+	1092	5	15	15	122	32	36	89	88	3	5	4	13
CCNA_01235	NC_011916.1	1362403	1363035	+	633	17	25	21	30	1	6	41	85	2	23	165	315
CCNA_01236	NC_011916.1	1363099	1363332	-	234	2	7	3	4	2	9	1	1	0	1	1	4
CCNA_01237	NC_011916.1	1363329	1363481	-	153	2	12	6	13	2	0	1	1	0	1	0	3
CCNA_01238	NC_011916.1	1363636	1364364	-	729	12	17	3	47	0	5	3	5	1	2	3	6
CCNA_01239	NC_011916.1	1364477	1365904	-	1428	23	127	20	26	18	46	5	12	3	65	6	25
CCNA_01240	NC_011916.1	1365901	1366665	-	765	13	18	23	45	12	12	2	4	1	3	2	6
CCNA_01241	NC_011916.1	1366756	1367472	-	717	9	18	9	12	4	36	120	151	32	58	162	141
CCNA_01242	NC_011916.1	1367607	1369202	-	1596	124	311	152	398	173	367	759	1565	384	1193	2325	3554
CCNA_01243	NC_011916.1	1369302	1371773	+	2472	41	58	36	70	14	33	16	135	105	222	211	220
CCNA_01244	NC_011916.1	1371913	1372320	-	408	16	30	0	2	0	1	50	69	81	151	0	1
CCNA_01245	NC_011916.1	1372630	1373421	-	792	7	26	6	59	5	11	2	20	0	0	31	197
CCNA_01246	NC_011916.1	1373427	1374338	-	912	13	38	21	42	28	51	236	323	4	3	6	14
CCNA_01247	NC_011916.1	1374356	1375792	-	1437	3	7	2	14	6	24	4	8	0	4	20	19
CCNA_01248	NC_011916.1	1375993	1376628	+	636	4	28	31	76	12	29	225	273	3	6	362	989
CCNA_01249	NC_011916.1	1376633	1377439	+	807	7	35	22	32	8	20	3	2	1	3	2	10
CCNA_01250	NC_011916.1	1377382	1378422	+	1041	6	26	1	4	9	30	3	42	33	43	7	9
CCNA_01251	NC_011916.1	1378419	1379177	+	759	5	13	6	15	25	53	29	43	0	3	11	27
CCNA_01252	NC_011916.1	1379181	1381280	-	2100	71	113	15	64	7	34	229	369	47	140	608	1122
CCNA_01253	NC_011916.1	1381534	1382418	+	885	26	47	43	74	33	65	180	339	0	3	59	541
CCNA_01254	NC_011916.1	1382418	1382876	+	459	23	27	2	0	22	36	6	12	60	145	0	5
CCNA_01255	NC_011916.1	1382977	1383126	-	150	2	3	9	38	1	11	65	126	70	72	1	2
CCNA_01256	NC_011916.1	1383564	1384559	-	996	2	6	2	7	2	8	3	2	0	2	6	9
CCNA_01257	NC_011916.1	1384556	1385512	-	957	3	27	2	5	10	28	3	4	2	3	3	7
CCNA_01258	NC_011916.1	1385509	1386171	-	663	7	5	11	21	10	31	40	89	3	3	2	18
CCNA_01259	NC_011916.1	1386326	1387099	+	774	24	47	3	28	7	35	178	317	13	18	66	626
CCNA_01260	NC_011916.1	1387138	1387887	+	750	14	22	35	48	5	8	2	7	0	2	525	407
CCNA_R0137	NC_011916.1	1387617	1387892	-	276	0	0	0	0	0	0	0	0	0	0	0	0
CCNA_01261	NC_011916.1	1388006	1389121	+	1116	9	19	0	13	12	35	1	6	0	5	235	242
CCNA_01262	NC_011916.1	1389121	1392264	+	3144	34	105	65	122	32	94	222	266	152	278	398	530
CCNA_01263	NC_011916.1	1392280	1394634	+	2355	32	82	29	66	14	59	58	95	207	399	185	325
CCNA_01264	NC_011916.1	1394767	1395261	-	495	3	2	0	2	0	1	0	4	0	2	0	1
CCNA_03947	NC_011916.1	1394783	1394905	+	123	0	0	0	0	0	0	0	0	0	0	0	0
CCNA_01265	NC_011916.1	1395376	1395498	-	123	0	0	0	1	2	6	19	46	7	15	7	1
CCNA_01266	NC_011916.1	1395597	1395953	-	357	0	2	0	2	11	9	0	0	0	3	1	1
CCNA_01267	NC_011916.1	1395950	1396687	-	738	10	25	23	37	2	16	0	6	27	90	339	403
CCNA_01268	NC_011916.1	1396765	1397271	-	507	13	45	1	6	0	3	2	32	2	2	290	277
CCNA_01269	NC_011916.1	1397552	1398055	+	504	2	13	0	1	16	11	137	124	1	0	2	5
CCNA_01270	NC_011916.1	1398112	1398321	+	210	3	1	0	0	0	0	0	1	6	34	0	1
CCNA_01271	NC_011916.1	1398470	1399003	+	534	21	40	44	46	1	4	64	120	14	55	1	8
CCNA_01272	NC_011916.1	1399011	1399442	-	432	0	4	0	4	0	5	0	5	1	1	3	1
CCNA_01273	NC_011916.1	1399447	1399908	-	462	3	2	1	3	6	8	3	2	1	12	4	4
CCNA_R0029	NC_011916.1	1399934	1400008	-	75	6	19	1	4	9	13	16	53	0	1	1	1
CCNA_01274	NC_011916.1	1400085	1401608	-	1524	19	47	35	47	14	30	14	59	23	69	15	224
CCNA_01275	NC_011916.1	1401717	1402610	+	894	1	8	3	14	13	36	3	13	111	169	6	10
CCNA_01276	NC_011916.1	1402610	1402969	+	360	5	11	1	3	6	12	4	4	0	0	1	6
CCNA_01277	NC_011916.1	1402986	1404392	+	1407	19	50	6	28	16	35	89	123	7	65	350	707
CCNA_01278	NC_011916.1	1404393	1404881	-	489	3	12	6	11	13	11	84	166	2	0	0	6
CCNA_01279	NC_011916.1	1404999	1405781	-	783	21	31	24	26	0	22	76	134	2	2	33	187
CCNA_01280	NC_011916.1	1405813	1406898	-	1086	49	52	0	16	23	47	59	104	0	2	169	314
CCNA_01281	NC_011916.1	1407064	1408554	+	1491	6	13	25	61	13	19	13	19	7	9	34	60
CCNA_01282	NC_011916.1	1408625	1409668	+	1044	1	5	1	13	1	3	5	2	3	4	0	17
CCNA_01283	NC_011916.1	1409575	1410771	+	1197	2	4	8	9	4	6	19	35	33	81	6	9
CCNA_01284	NC_011916.1	1410657	1411604	+	948	3	4	24	28	1	4	1	4	2	71	1	8
CCNA_01285	NC_011916.1	1411601	1412590	-	990	8	30	12	10	9	12	4	16	11	10	4	13
CCNA_01286	NC_011916.1	1412679	1412939	+	261	0	1	0	2	1	0	8	11	0	0	0	3
CCNA_01287	NC_011916.1	1412941	1413933	-	993	9	24	3	5	30	32	119	131	1	2	4	11
CCNA_01288	NC_011916.1	1414050	1415267	+	1218	5	11	23	36	13	58	8	24	9	109	124	386
CCNA_01289	NC_011916.1	1415258	1415635	-	378	0	1	5	7	0	4	1	1	0	0	1	5
CCNA_01290	NC_011916.1	1415745	1416851	+	1107	4	6	12	9	8	9	3	7	21	77	103	133
CCNA_01291	NC_011916.1	1416848	1417858	+	1011	13	18	7	18	1	8	3	10	2	3	6	12
CCNA_01292	NC_011916.1	1417855	1418280	+	426	2	0	1	3	8	16	0	0	0	3	1	7
CCNA_01293	NC_011916.1	1418341	1418772	-	432	1	0	0	1	3	16	28	45	5	13	6	6
CCNA_01294	NC_011916.1	1418730	1419224	+	495	1	1	10	9	6	3	0	1	8	13	1	1
CCNA_01295	NC_011916.1	1419254	1419994	-	741	25	28	53	147	44	75	138	157	37	66	69	66
CCNA_01296	NC_011916.1	1420118	1422046	-	1929	18	37	10	20	34	70	37	163	16	47	238	278
CCNA_01297	NC_011916.1	1422154	1422990	-	837	15	31	12	35	15	34	65	82	1	8	114	378
CCNA_R0030	NC_011916.1	1423164	1423249	+	86	24	85	8	97	24	81	57	150	86	241	34	434
CCNA_R0031	NC_011916.1	1423360	1423433	+	74	58	131	116	203	64	177	477	872	234	400	331	586
CCNA_01298	NC_011916.1	1423488	1424678	+	1191	1094	2172	1161	2614	1073	2123	5578	11148	2037	4407	8675	14305
CCNA_01299	NC_011916.1	1424774	1425400	+	627	3	19	2	6	11	17	2	6	0	2	1	0
CCNA_01300	NC_011916.1	1425640	1426458	+	819	4	6	1	14	3	8	49	65	1	5	4	10
CCNA_01301	NC_011916.1	1426458	1428746	+	2289	67	71	33	36	7	54	2	16	2	9	127	172
CCNA_01302	NC_011916.1	1428800	1429948	+	1149	9	52	21	29	22	32	41	107	46	57	63	421
CCNA_01303	NC_011916.1	1430061	1430900	+	840	61	96	104	153	42	82	11	27	2	6	523	1479
CCNA_01304	NC_011916.1	1431129	1431329	+	201	179	346	228	464	259	476	336	807	247	533	1680	3687
CCNA_01305	NC_011916.1	1431343	1431651	+	309	246	387	232	420	222	400	1869	3314	766	1675	1987	2848
CCNA_01306	NC_011916.1	1431629	1432432	+	804	446	933	524	956	724	1230	3970	6929	1834	3571	6547	9399
CCNA_01307	NC_011916.1	1432432	1433070	+	639	491	736	433	639	544	1066	3352	5058	724	1371	3436	4978
CCNA_01308	NC_011916.1	1433070	1433366	+	297	129	305	305	521	223	482	1417	3325	370	913	1307	2706
CCNA_01309	NC_011916.1	1433370	1434209	+	840	526	907	565	1038	693	1207	4374	8370	910	1507	4576	7214
CCNA_01310	NC_011916.1	1434213	1434491	+	279	124	239	202	268	145	272	398	848	460	694	1253	2860
CCNA_01311	NC_011916.1	1434494	1434874	+	381	118	192	177	383	234	436	681	1300	224	336	1684	2272
CCNA_01312	NC_011916.1	1434874	1435626	+	753	539	991	603	1087	594	1204	3234	5077	888	1971	4603	6442
CCNA_01313	NC_011916.1	1435640	1436071	+	432	140	376	340	801	279	497	1826	2789	357	924	1366	2160
CCNA_01314	NC_011916.1	1436077	1436268	+	192	90	207	175	284	145	240	557	1003	310	478	621	1729
CCNA_01315	NC_011916.1	1436279	1436518	+	240	163	265	395	543	129	264	605	1338	550	1063	1588	1993
CCNA_01316	NC_011916.1	1436536	1436904	+	369	240	318	183	305	324	561	1512	2299	569	786	2490	3306
CCNA_01317	NC_011916.1	1436904	1437218	+	315	146	275	186	439	187	422	1019	2084	343	747	1046	2015
CCNA_01318	NC_011916.1	1437211	1437768	+	558	380	687	470	1004	427	808	2959	5614	962	1761	4629	7072
CCNA_01319	NC_011916.1	1437790	1438095	+	306	194	353	280	361	194	344	601	1165	510	893	1911	2934
CCNA_01320	NC_011916.1	1438106	1438504	+	399	288	529	258	580	281	475	1658	2913	771	1307	1743	3914
CCNA_01321	NC_011916.1	1438523	1439056	+	534	309	538	224	614	275	490	2422	4609	265	762	1955	5033
CCNA_01322	NC_011916.1	1439060	1439410	+	351	180	420	214	509	410	738	1352	3127	446	1022	1184	2873
CCNA_01323	NC_011916.1	1439421	1440026	+	606	331	563	196	540	272	434	1728	3418	532	855	2386	4629
CCNA_01324	NC_011916.1	1440030	1440215	+	186	24	59	28	48	47	70	420	540	212	225	283	554
CCNA_01325	NC_011916.1	1440388	1440873	+	486	94	189	18	57	77	154	553	1164	230	391	1298	1975
CCNA_01326	NC_011916.1	1441093	1442448	+	1356	126	265	130	305	181	358	897	1949	350	783	2107	3486
CCNA_01327	NC_011916.1	1442583	1443158	+	576	131	263	177	376	136	229	139	329	213	550	614	785
CCNA_01328	NC_011916.1	1443405	1443773	+	369	209	405	225	523	172	396	691	1864	520	865	2335	3522
CCNA_01329	NC_011916.1	1443787	1444176	+	390	220	410	347	594	254	466	1461	2784	591	1435	2110	2342
CCNA_01330	NC_011916.1	1444254	1445270	+	1017	225	420	312	631	419	872	1922	4391	441	1067	2874	4562
CCNA_01332	NC_011916.1	1445475	1445888	+	414	114	144	124	181	87	225	170	520	0	11	1104	1911
CCNA_01333	NC_011916.1	1446332	1446724	-	393	1	3	6	9	7	20	9	20	2	5	0	4
CCNA_01334	NC_011916.1	1446891	1447721	-	831	10	16	14	26	5	14	6	8	89	125	89	250
CCNA_01335	NC_011916.1	1447721	1448638	-	918	6	18	32	73	11	35	2	11	47	63	4	9
CCNA_01336	NC_011916.1	1448810	1450039	+	1230	19	43	6	8	14	23	112	118	5	11	164	235
CCNA_01337	NC_011916.1	1450109	1451731	+	1623	12	17	38	32	35	44	4	14	4	78	10	26
CCNA_01338	NC_011916.1	1451802	1452257	+	456	0	3	4	13	1	5	0	1	3	1	174	273
CCNA_01339	NC_011916.1	1452254	1452583	+	330	8	8	0	1	0	0	0	1	0	0	0	0
CCNA_03880	NC_011916.1	1452580	1453074	+	495	1	2	2	1	18	18	1	6	2	0	1	1
CCNA_01340	NC_011916.1	1453071	1454321	+	1251	11	50	40	72	26	49	8	91	162	414	7	9
CCNA_01341	NC_011916.1	1454414	1455832	+	1419	17	38	12	62	21	38	124	251	1	6	19	60
CCNA_01342	NC_011916.1	1455951	1457252	+	1302	6	22	23	64	16	36	49	96	0	1	4	16
CCNA_01343	NC_011916.1	1457249	1458061	+	813	22	54	1	46	3	13	4	10	36	61	191	243
CCNA_01344	NC_011916.1	1458048	1458584	+	537	2	1	22	19	1	3	78	98	17	20	2	7
CCNA_01345	NC_011916.1	1458745	1459527	+	783	23	27	36	39	2	4	3	3	3	7	5	13
CCNA_01346	NC_011916.1	1459714	1460394	+	681	5	19	2	5	1	5	0	7	0	8	12	100
CCNA_01347	NC_011916.1	1460358	1461083	+	726	2	4	8	43	1	13	55	347	3	3	13	39
CCNA_01348	NC_011916.1	1461471	1462034	+	564	9	16	2	3	5	15	80	114	1	1	0	3
CCNA_01349	NC_011916.1	1462307	1462717	+	411	0	0	7	14	4	13	0	1	0	1	125	208
CCNA_01350	NC_011916.1	1462732	1463100	+	369	3	10	0	0	3	5	0	0	19	31	1	1
CCNA_01351	NC_011916.1	1463228	1463956	-	729	2	4	2	8	13	40	34	85	31	58	1	6
CCNA_01352	NC_011916.1	1463957	1465588	-	1632	54	97	26	92	36	71	457	605	0	8	594	1036
CCNA_01353	NC_011916.1	1465853	1467880	-	2028	11	61	48	112	10	34	141	348	53	72	12	19
CCNA_01354	NC_011916.1	1468212	1469198	-	987	31	34	21	33	22	19	3	12	72	136	332	534
CCNA_01355	NC_011916.1	1469366	1470241	+	876	20	62	0	4	1	18	1	4	1	2	1	6
CCNA_01356	NC_011916.1	1470370	1472298	+	1929	36	34	58	107	20	26	83	168	2	3	51	78
CCNA_01357	NC_011916.1	1472300	1474144	+	1845	19	24	13	20	18	46	6	105	60	92	176	224
CCNA_01358	NC_011916.1	1474148	1475047	+	900	3	26	18	54	28	63	32	135	0	0	117	128
CCNA_01359	NC_011916.1	1475044	1475853	+	810	3	7	4	1	1	14	0	5	0	2	3	7
CCNA_01360	NC_011916.1	1475884	1477386	+	1503	19	47	18	51	22	33	178	299	1	5	3	11
CCNA_01361	NC_011916.1	1477574	1477915	+	342	5	9	0	0	2	5	0	0	0	1	0	3
CCNA_01362	NC_011916.1	1477912	1478580	+	669	0	10	12	34	2	8	2	4	1	4	1	7
CCNA_01363	NC_011916.1	1478577	1479935	+	1359	4	15	9	29	62	39	108	152	3	9	7	41
CCNA_01364	NC_011916.1	1480166	1481191	+	1026	18	53	63	120	18	16	2	5	2	1	299	301
CCNA_01365	NC_011916.1	1481196	1481714	-	519	33	44	3	15	21	27	1	5	1	4	1	5
CCNA_01366	NC_011916.1	1482020	1482244	-	225	9	11	1	4	0	2	0	3	20	32	0	5
CCNA_01367	NC_011916.1	1482331	1483221	+	891	30	72	16	58	21	59	142	402	47	71	16	172
CCNA_01368	NC_011916.1	1483373	1484587	+	1215	9	18	61	64	12	19	221	365	66	68	10	9
CCNA_01369	NC_011916.1	1484714	1485853	+	1140	8	55	4	6	1	9	3	8	0	1	291	311
CCNA_03948	NC_011916.1	1486209	1486346	+	138	0	0	1	0	6	5	0	1	0	1	1	0
CCNA_01371	NC_011916.1	1486421	1486729	-	309	0	2	3	3	8	18	14	117	2	19	1	5
CCNA_01372	NC_011916.1	1486831	1487439	-	609	38	114	7	11	13	39	159	351	20	86	384	901
CCNA_01373	NC_011916.1	1487512	1488318	+	807	3	6	0	9	8	27	6	6	1	4	2	5
CCNA_01374	NC_011916.1	1488246	1490177	+	1932	4	27	13	15	12	33	9	46	3	11	21	39
CCNA_01375	NC_011916.1	1490238	1490675	+	438	12	26	23	23	9	17	80	217	106	155	334	446
CCNA_01376	NC_011916.1	1490853	1491557	+	705	13	18	1	9	14	58	71	203	13	38	446	821
CCNA_R0032	NC_011916.1	1491642	1491707	+	66	0	0	1	0	8	12	0	0	1	0	0	0
CCNA_R0033	NC_011916.1	1491776	1491850	+	75	6	18	10	17	3	13	0	0	0	0	1	4
CCNA_R0034	NC_011916.1	1491986	1492060	+	75	6	19	10	27	5	13	0	1	0	0	1	2
CCNA_01377	NC_011916.1	1492093	1492239	-	147	6	14	0	0	0	1	0	0	0	1	0	0
CCNA_01378	NC_011916.1	1492535	1493107	+	573	23	24	46	120	42	74	235	394	64	191	251	416
CCNA_01379	NC_011916.1	1493232	1494683	+	1452	98	98	92	169	90	167	454	1060	295	335	380	1018
CCNA_01380	NC_011916.1	1494812	1495345	+	534	49	141	100	148	70	79	153	268	94	126	285	704
CCNA_01381	NC_011916.1	1495472	1498192	+	2721	175	311	330	579	143	207	458	1109	212	441	863	1278
CCNA_01382	NC_011916.1	1498487	1500238	+	1752	17	25	13	27	22	41	262	362	1	12	12	17
CCNA_01383	NC_011916.1	1500243	1500605	+	363	0	0	2	1	1	7	129	119	0	2	0	9
CCNA_01384	NC_011916.1	1500699	1502186	-	1488	4	22	2	12	5	10	56	381	0	11	166	273
CCNA_01385	NC_011916.1	1502307	1503038	+	732	22	25	114	126	32	34	52	83	0	3	2	7
CCNA_01386	NC_011916.1	1503106	1503747	-	642	33	67	7	49	22	34	61	139	8	19	144	339
CCNA_01387	NC_011916.1	1503930	1505177	+	1248	17	26	7	12	17	19	5	11	49	131	7	31
CCNA_01388	NC_011916.1	1505184	1506251	+	1068	34	52	7	44	14	32	3	12	18	45	3	25
CCNA_01389	NC_011916.1	1506300	1507313	+	1014	31	84	12	34	17	17	86	114	3	6	498	876
CCNA_01390	NC_011916.1	1507389	1509002	+	1614	10	4	16	61	15	28	128	172	6	3	7	19
CCNA_01391	NC_011916.1	1509067	1510149	+	1083	4	26	53	81	17	68	6	101	0	6	255	263
CCNA_01392	NC_011916.1	1510305	1510772	+	468	23	19	6	102	7	11	4	9	3	0	9	20
CCNA_01393	NC_011916.1	1510803	1512413	-	1611	5	4	14	40	10	42	1	12	6	7	205	324
CCNA_01394	NC_011916.1	1512465	1513286	-	822	16	21	13	17	14	43	2	13	1	6	8	12
CCNA_01395	NC_011916.1	1513437	1515113	+	1677	14	22	16	64	29	61	425	709	58	95	75	342
CCNA_01396	NC_011916.1	1515188	1516918	+	1731	14	30	22	62	18	37	2	16	121	161	7	48
CCNA_01397	NC_011916.1	1516960	1517832	+	873	21	55	13	56	29	19	170	205	1	1	156	180
CCNA_01398	NC_011916.1	1517840	1518478	+	639	1	4	2	2	8	8	13	24	0	2	0	5
CCNA_01399	NC_011916.1	1518556	1520088	-	1533	22	30	43	52	62	129	160	218	107	181	49	369
CCNA_01400	NC_011916.1	1520115	1520453	-	339	11	20	7	53	8	10	0	1	68	151	1	1
CCNA_01403	NC_011916.1	1520934	1521833	+	900	69	104	35	63	64	113	1	5	3	4	275	363
CCNA_01404	NC_011916.1	1521840	1523918	+	2079	40	95	86	201	97	139	599	1180	20	64	785	1270
CCNA_R0138	NC_011916.1	1523671	1524041	-	371	0	1	0	0	0	0	0	0	0	0	0	0
CCNA_R0139	NC_011916.1	1523962	1524041	+	80	0	0	0	0	0	0	0	0	0	0	0	0
CCNA_01405	NC_011916.1	1524077	1524403	-	327	31	40	15	19	28	64	0	1	65	142	0	3
CCNA_R0140	NC_011916.1	1524470	1524552	-	83	2	3	0	0	0	0	0	0	0	0	0	1
CCNA_01406	NC_011916.1	1524621	1525478	-	858	17	61	40	81	37	111	223	413	138	241	825	1335
CCNA_01407	NC_011916.1	1525535	1526167	+	633	1	5	7	32	1	3	2	8	19	25	56	321
CCNA_01408	NC_011916.1	1526164	1526559	-	396	0	1	32	51	0	5	17	109	0	5	3	3
CCNA_01409	NC_011916.1	1526556	1527560	-	1005	7	17	42	39	19	18	29	39	5	7	3	19
CCNA_01410	NC_011916.1	1527619	1529118	-	1500	10	19	29	94	12	15	2	12	54	71	92	365
CCNA_03949	NC_011916.1	1529253	1529711	-	459	15	34	2	24	22	20	108	119	22	45	89	90
CCNA_03950	NC_011916.1	1529779	1529883	+	105	0	3	17	23	9	15	0	2	0	1	148	255
CCNA_01412	NC_011916.1	1529975	1531120	+	1146	62	79	1	8	22	54	129	324	4	9	564	550
CCNA_01413	NC_011916.1	1531128	1531727	+	600	14	18	3	8	13	29	146	318	18	44	26	43
CCNA_01414	NC_011916.1	1531736	1532788	+	1053	57	80	36	68	34	65	5	144	24	46	23	319
CCNA_01415	NC_011916.1	1532847	1533644	+	798	17	51	1	4	31	35	85	142	198	209	350	608
CCNA_01416	NC_011916.1	1533716	1534612	+	897	17	26	10	65	22	34	31	67	2	4	0	9
CCNA_01417	NC_011916.1	1534788	1536014	+	1227	71	143	98	172	60	114	369	670	81	311	586	914
CCNA_01418	NC_011916.1	1536112	1536558	-	447	12	15	24	31	4	9	0	1	1	5	229	252
CCNA_01419	NC_011916.1	1536723	1538009	+	1287	124	199	111	164	101	206	245	690	452	874	1480	1979
CCNA_01420	NC_011916.1	1538042	1538515	+	474	40	29	70	111	12	26	63	231	0	0	2	10
CCNA_01421	NC_011916.1	1538581	1539045	+	465	17	24	17	52	46	70	95	353	37	234	22	96
CCNA_01422	NC_011916.1	1539042	1539491	+	450	15	34	1	3	5	26	43	127	3	31	100	265
CCNA_01423	NC_011916.1	1539451	1540509	+	1059	2	6	15	51	16	52	1	1	73	240	6	14
CCNA_01424	NC_011916.1	1540672	1541166	+	495	11	12	25	51	17	16	6	137	1	1	62	302
CCNA_01425	NC_011916.1	1541409	1543547	+	2139	2	25	28	83	26	66	63	106	109	110	49	50
CCNA_01426	NC_011916.1	1543638	1544192	-	555	3	11	19	27	7	29	5	11	0	2	1	9
CCNA_01427	NC_011916.1	1544458	1544940	-	483	14	13	38	48	36	64	125	173	1	2	25	429
CCNA_01429	NC_011916.1	1545062	1545592	+	531	1	2	1	4	17	31	111	370	2	2	532	946
CCNA_01430	NC_011916.1	1545577	1546116	+	540	11	13	25	47	20	35	212	366	0	4	2	3
CCNA_01431	NC_011916.1	1546292	1547374	+	1083	88	130	42	44	28	39	57	209	127	223	439	604
CCNA_01432	NC_011916.1	1547371	1548348	+	978	38	67	8	50	17	64	5	79	122	324	637	592
CCNA_01433	NC_011916.1	1548563	1548865	+	303	44	121	19	56	7	13	73	248	30	63	6	275
CCNA_01434	NC_011916.1	1548878	1549303	+	426	6	11	1	3	10	13	86	106	5	84	171	261
CCNA_R0035	NC_011916.1	1549367	1549443	+	77	53	119	70	239	61	147	64	201	70	197	161	214
CCNA_01435	NC_011916.1	1549509	1549760	-	252	8	12	0	2	7	5	0	0	0	0	5	1
CCNA_01437	NC_011916.1	1549757	1550008	-	252	1	3	0	0	1	6	1	1	0	0	2	5
CCNA_01438	NC_011916.1	1550159	1551190	+	1032	13	81	75	98	30	70	213	248	79	161	89	117
CCNA_01439	NC_011916.1	1551231	1552631	-	1401	10	9	5	12	7	25	18	25	4	60	9	13
CCNA_01440	NC_011916.1	1552866	1553339	+	474	282	567	374	607	360	622	1950	4157	612	1019	3107	5742
CCNA_01441	NC_011916.1	1553343	1553816	+	474	239	465	182	337	82	240	1341	1737	438	697	1669	2829
CCNA_01442	NC_011916.1	1553908	1554861	+	954	3	35	44	85	28	55	159	175	0	3	2	6
CCNA_01443	NC_011916.1	1554869	1555501	-	633	0	5	32	30	15	30	43	194	5	68	2	7
CCNA_01444	NC_011916.1	1555589	1557607	-	2019	26	141	90	229	15	31	456	839	31	140	168	366
CCNA_01445	NC_011916.1	1557697	1558137	+	441	48	64	15	34	10	22	3	7	1	1	218	293
CCNA_01446	NC_011916.1	1558246	1559466	+	1221	4	12	35	62	18	38	155	273	79	123	65	431
CCNA_01447	NC_011916.1	1559503	1560792	+	1290	17	25	10	39	50	104	24	160	1	9	5	9
CCNA_01448	NC_011916.1	1560867	1561820	+	954	31	49	53	98	15	20	107	339	74	140	29	299
CCNA_01449	NC_011916.1	1561881	1562858	+	978	15	18	5	1	7	26	7	32	0	7	5	6
CCNA_01450	NC_011916.1	1562926	1564746	+	1821	35	71	46	63	34	35	16	25	1	7	255	252
CCNA_R0036	NC_011916.1	1564876	1564950	+	75	143	287	128	315	112	240	179	503	121	352	1033	1925
CCNA_R0037	NC_011916.1	1564996	1565070	+	75	135	263	109	257	101	214	188	506	133	349	1093	2017
CCNA_01451	NC_011916.1	1565243	1565833	+	591	12	12	21	18	6	28	2	5	48	189	2	3
CCNA_01452	NC_011916.1	1565802	1566356	+	555	1	12	0	2	6	20	6	104	2	3	370	646
CCNA_R0038	NC_011916.1	1566421	1566497	+	77	1	6	1	5	20	33	8	21	15	19	85	123
CCNA_01453	NC_011916.1	1566524	1566829	+	306	29	17	12	42	18	23	98	150	0	0	0	4
CCNA_R0039	NC_011916.1	1566858	1566934	+	77	44	86	50	134	18	41	8	23	17	77	7	93
CCNA_01457	NC_011916.1	1567625	1567876	+	252	1	0	8	30	0	0	0	0	0	5	0	1
CCNA_01458	NC_011916.1	1567879	1568187	+	309	0	2	4	4	2	3	1	2	0	1	0	1
CCNA_01459	NC_011916.1	1568188	1568445	+	258	2	1	0	1	2	0	0	0	0	1	1	1
CCNA_01460	NC_011916.1	1568518	1568736	+	219	5	16	0	5	0	3	43	72	0	2	1	3
CCNA_01461	NC_011916.1	1568764	1569069	+	306	0	10	4	2	1	4	0	1	0	4	0	2
CCNA_01462	NC_011916.1	1569294	1570469	-	1176	25	59	9	80	13	26	112	117	1	4	7	15
CCNA_01463	NC_011916.1	1570667	1571776	-	1110	17	33	3	8	11	36	20	100	66	65	119	178
CCNA_03951	NC_011916.1	1571872	1571955	-	84	2	7	0	2	0	0	0	0	0	0	0	1
CCNA_01464	NC_011916.1	1572066	1572383	-	318	18	94	1	7	32	41	21	25	78	419	2	6
CCNA_01465	NC_011916.1	1572606	1574201	+	1596	14	25	5	16	15	16	1	16	1	2	7	16
CCNA_01466	NC_011916.1	1574323	1574589	-	267	0	2	2	22	1	2	0	1	0	0	1	6
CCNA_01467	NC_011916.1	1574712	1576358	+	1647	5	22	7	12	9	19	1	5	2	8	7	9
CCNA_01468	NC_011916.1	1576367	1577110	+	744	2	2	1	4	0	5	2	2	15	39	189	425
CCNA_01469	NC_011916.1	1577107	1577274	+	168	0	3	0	1	0	1	0	1	0	0	0	0
CCNA_01470	NC_011916.1	1577274	1578140	+	867	0	2	23	21	2	5	2	7	5	4	5	14
CCNA_01471	NC_011916.1	1578146	1579636	+	1491	3	9	5	10	27	42	49	99	40	64	6	8
CCNA_01472	NC_011916.1	1579633	1580133	+	501	2	11	9	10	3	6	80	141	4	8	24	35
CCNA_01473	NC_011916.1	1580130	1582304	+	2175	33	75	22	60	18	32	16	89	24	58	25	41
CCNA_01474	NC_011916.1	1582301	1582468	+	168	0	0	0	1	0	0	0	0	0	1	1	2
CCNA_01475	NC_011916.1	1582599	1583243	+	645	1	2	1	3	3	4	3	3	2	1	8	7
CCNA_01476	NC_011916.1	1583425	1584192	+	768	0	2	2	4	5	17	2	7	56	153	0	4
CCNA_01477	NC_011916.1	1584237	1585601	+	1365	17	35	5	9	9	29	1	8	4	36	102	169
CCNA_01478	NC_011916.1	1585598	1586344	-	747	20	51	5	48	16	22	84	194	1	1	4	13
CCNA_01479	NC_011916.1	1586381	1588444	+	2064	31	58	7	7	13	23	74	105	2	5	2	17
CCNA_01480	NC_011916.1	1588441	1588848	+	408	6	30	6	54	28	89	90	227	0	0	37	267
CCNA_01481	NC_011916.1	1588858	1590603	+	1746	69	121	13	62	22	60	11	134	109	144	344	302
CCNA_01483	NC_011916.1	1590869	1591087	+	219	0	2	0	0	0	2	7	40	4	8	0	3
CCNA_01484	NC_011916.1	1591111	1591530	+	420	9	7	28	27	6	6	0	2	0	2	4	4
CCNA_01485	NC_011916.1	1591536	1592672	-	1137	17	18	13	33	3	10	0	10	4	4	206	231
CCNA_01486	NC_011916.1	1592713	1593723	-	1011	3	4	2	18	6	13	1	12	5	40	7	8
CCNA_01487	NC_011916.1	1593897	1594643	+	747	28	39	25	90	21	61	6	16	16	148	2	19
CCNA_01488	NC_011916.1	1594813	1596615	+	1803	40	68	45	157	18	47	37	90	65	91	164	284
CCNA_01489	NC_011916.1	1596728	1598278	+	1551	4	21	28	71	18	27	14	91	2	5	93	256
CCNA_01490	NC_011916.1	1598349	1599989	+	1641	17	40	31	42	33	36	94	127	5	7	11	16
CCNA_01491	NC_011916.1	1599999	1601159	-	1161	7	31	15	80	14	54	78	163	14	48	81	158
CCNA_01492	NC_011916.1	1601184	1602041	-	858	12	42	39	81	15	26	12	66	51	162	259	470
CCNA_01493	NC_011916.1	1602115	1603113	-	999	5	10	1	9	8	24	1	4	31	76	3	3
CCNA_01494	NC_011916.1	1603290	1604531	-	1242	13	25	12	47	20	15	2	8	0	5	2	7
CCNA_01495	NC_011916.1	1604575	1606026	-	1452	5	10	22	33	5	16	2	7	12	59	9	19
CCNA_01496	NC_011916.1	1606088	1606951	+	864	71	182	148	430	33	103	123	322	119	393	473	1297
CCNA_01497	NC_011916.1	1606954	1607955	+	1002	15	32	1	2	13	32	38	82	1	3	6	9
CCNA_R0141	NC_011916.1	1607671	1607996	-	326	1	0	0	0	0	0	0	0	0	0	1	0
CCNA_01498	NC_011916.1	1608057	1609523	+	1467	1	3	45	76	3	18	150	143	0	4	3	21
CCNA_01499	NC_011916.1	1609534	1610736	+	1203	1	17	2	5	3	22	1	8	24	78	6	27
CCNA_01500	NC_011916.1	1610768	1611922	+	1155	25	59	39	74	21	42	55	148	0	2	9	22
CCNA_01501	NC_011916.1	1611887	1612267	-	381	3	1	9	11	13	15	0	6	0	1	3	3
CCNA_01503	NC_011916.1	1612264	1613346	-	1083	1	15	10	33	2	6	0	10	3	14	8	16
CCNA_01502	NC_011916.1	1613345	1614289	+	945	1	2	8	15	18	28	90	159	0	4	80	400
CCNA_01504	NC_011916.1	1614298	1616394	-	2097	8	32	15	40	22	45	161	243	9	47	21	177
CCNA_01505	NC_011916.1	1616437	1616739	-	303	6	29	31	42	9	34	0	4	6	19	2	105
CCNA_01506	NC_011916.1	1616805	1617545	-	741	1	1	19	34	0	4	27	62	0	2	2	6
CCNA_01507	NC_011916.1	1617542	1618201	-	660	17	25	21	40	10	19	2	5	2	3	223	244
CCNA_01508	NC_011916.1	1618206	1618991	-	786	16	25	13	53	15	49	308	341	0	5	184	349
CCNA_01509	NC_011916.1	1619099	1620214	-	1116	36	43	4	11	19	23	114	237	93	155	7	28
CCNA_01510	NC_011916.1	1620483	1620866	+	384	0	1	1	3	3	12	2	3	0	2	2	3
CCNA_01511	NC_011916.1	1620866	1621768	+	903	4	16	2	2	2	9	35	60	1	2	10	19
CCNA_01512	NC_011916.1	1621899	1622564	+	666	0	9	0	25	7	10	24	31	0	5	4	11
CCNA_01513	NC_011916.1	1622843	1623826	+	984	3	7	1	5	4	1	2	4	0	9	5	11
CCNA_01514	NC_011916.1	1623823	1624323	+	501	5	1	1	5	0	3	1	1	18	22	0	3
CCNA_01515	NC_011916.1	1624314	1625594	+	1281	4	17	8	20	16	17	40	53	0	5	5	14
CCNA_01516	NC_011916.1	1625780	1626412	-	633	1	2	7	9	6	10	2	2	0	4	12	314
CCNA_01517	NC_011916.1	1626548	1627576	-	1029	17	29	36	58	3	19	10	17	55	127	3	25
CCNA_03892	NC_011916.1	1627539	1628183	-	645	20	8	3	10	17	31	4	51	0	4	3	8
CCNA_01519	NC_011916.1	1628290	1629102	+	813	10	28	13	32	7	10	2	7	40	66	4	10
CCNA_01520	NC_011916.1	1629134	1629508	+	375	4	9	2	18	2	11	1	2	0	2	694	721
CCNA_01521	NC_011916.1	1629643	1630458	-	816	4	47	5	27	6	41	3	1	17	24	1	7
CCNA_01522	NC_011916.1	1630557	1631426	-	870	0	1	1	1	2	17	3	3	0	3	5	17
CCNA_01523	NC_011916.1	1631535	1632116	-	582	9	40	12	5	4	22	0	1	1	2	3	2
CCNA_01524	NC_011916.1	1632277	1634067	-	1791	11	39	34	60	25	54	4	10	0	3	4	21
CCNA_01525	NC_011916.1	1634266	1634691	+	426	32	87	10	26	3	31	69	84	32	44	109	332
CCNA_01526	NC_011916.1	1634651	1635013	+	363	13	31	7	36	17	36	33	81	31	60	0	6
CCNA_01527	NC_011916.1	1635261	1636082	+	822	376	713	611	1053	320	547	2095	3062	949	1600	2938	4948
CCNA_01528	NC_011916.1	1636359	1637180	+	822	127	208	141	212	142	301	936	1520	407	701	920	1893
CCNA_01529	NC_011916.1	1637293	1637661	+	369	29	74	17	9	13	35	259	435	38	99	390	603
CCNA_01530	NC_011916.1	1637841	1638677	+	837	30	60	55	73	22	91	424	611	28	137	22	408
CCNA_01531	NC_011916.1	1638743	1639297	+	555	128	162	46	95	83	182	218	454	144	354	364	486
CCNA_01532	NC_011916.1	1639377	1642241	+	2865	18	87	35	52	19	61	6	113	34	183	995	1273
CCNA_01533	NC_011916.1	1642303	1642992	+	690	50	78	7	11	11	45	159	462	14	40	60	84
CCNA_01534	NC_011916.1	1643010	1643408	+	399	5	19	29	44	7	11	0	2	2	2	3	217
CCNA_01535	NC_011916.1	1643665	1644168	+	504	56	114	14	56	37	57	274	478	32	96	338	602
CCNA_01536	NC_011916.1	1644321	1645001	+	681	21	48	3	16	14	32	57	127	0	3	0	5
CCNA_R0040	NC_011916.1	1645113	1645326	+	214	1	1	2	1	0	12	0	0	1	1	0	2
CCNA_01537	NC_011916.1	1645354	1645890	-	537	16	20	16	24	15	18	5	2	0	0	4	6
CCNA_01538	NC_011916.1	1646212	1648902	+	2691	224	383	206	361	201	403	1000	1795	408	773	1168	2373
CCNA_03952	NC_011916.1	1649019	1649504	+	486	3	3	1	2	12	43	1	11	10	18	6	7
CCNA_01539	NC_011916.1	1649458	1650156	-	699	21	21	1	16	4	4	1	4	1	4	2	7
CCNA_01541	NC_011916.1	1650282	1651178	+	897	3	4	32	58	1	27	8	67	3	4	10	29
CCNA_01542	NC_011916.1	1651185	1653455	-	2271	20	53	89	140	16	28	4	15	3	7	14	36
CCNA_01543	NC_011916.1	1653545	1654885	-	1341	25	27	35	56	13	46	21	676	8	86	96	116
CCNA_01545	NC_011916.1	1655039	1656220	+	1182	11	34	49	158	8	13	102	121	4	26	75	196
CCNA_01546	NC_011916.1	1656352	1658577	-	2226	113	192	70	166	72	145	181	366	56	43	144	475
CCNA_03953	NC_011916.1	1658850	1659263	-	414	0	1	1	1	1	3	0	2	1	2	0	1
CCNA_01547	NC_011916.1	1659435	1661144	+	1710	27	33	106	135	33	74	169	327	1	5	475	708
CCNA_01548	NC_011916.1	1661146	1662360	+	1215	7	20	15	36	7	18	3	6	4	12	265	395
CCNA_01549	NC_011916.1	1662374	1664281	-	1908	8	31	38	52	23	29	5	14	6	6	181	314
CCNA_01550	NC_011916.1	1664281	1665261	-	981	12	41	42	62	6	41	6	5	1	66	235	682
CCNA_01551	NC_011916.1	1665480	1665698	+	219	0	2	13	11	1	4	0	2	67	84	2	7
CCNA_01552	NC_011916.1	1665871	1668519	+	2649	43	55	80	133	73	138	110	157	43	55	371	806
CCNA_01553	NC_011916.1	1668534	1669094	+	561	1	1	1	3	1	3	59	102	13	67	7	5
CCNA_01554	NC_011916.1	1669091	1670539	-	1449	1	10	9	25	4	11	3	9	0	3	4	13
CCNA_01555	NC_011916.1	1670626	1672134	-	1509	7	25	11	24	7	16	1	10	4	2	3	16
CCNA_01556	NC_011916.1	1672295	1673368	+	1074	40	60	54	98	11	77	72	229	15	96	11	8
CCNA_01557	NC_011916.1	1673476	1674939	+	1464	3	9	31	82	15	22	1	15	2	3	3	13
CCNA_01558	NC_011916.1	1674964	1675803	+	840	1	6	18	28	9	21	122	270	1	3	312	293
CCNA_01559	NC_011916.1	1675960	1676727	+	768	1	7	3	10	1	11	35	55	1	5	4	16
CCNA_01560	NC_011916.1	1676914	1679643	+	2730	17	45	18	33	26	79	113	307	157	205	554	753
CCNA_01561	NC_011916.1	1679798	1680181	+	384	0	3	0	4	1	3	1	1	0	2	62	99
CCNA_01562	NC_011916.1	1680175	1680849	+	675	46	79	16	58	73	124	80	281	104	279	201	735
CCNA_01563	NC_011916.1	1680856	1681962	+	1107	34	73	32	55	80	98	298	788	136	179	301	738
CCNA_R0142	NC_011916.1	1682820	1682976	+	157	0	2	5	31	4	27	10	54	0	0	0	1
CCNA_01566	NC_011916.1	1682996	1683307	-	312	3	10	9	20	2	8	1	4	0	2	1	5
CCNA_01567	NC_011916.1	1683567	1684652	+	1086	2	8	15	50	28	65	5	9	0	9	594	539
CCNA_01568	NC_011916.1	1684807	1686171	+	1365	3	12	37	36	6	12	32	32	62	57	15	225
CCNA_01569	NC_011916.1	1686283	1687005	+	723	1	11	1	10	10	13	1	8	1	2	2	9
CCNA_01570	NC_011916.1	1687082	1688644	+	1563	26	17	2	12	5	11	21	58	2	4	4	17
CCNA_01571	NC_011916.1	1688684	1689097	-	414	0	2	6	20	0	1	2	0	1	2	0	2
CCNA_01572	NC_011916.1	1689094	1689768	-	675	12	38	0	4	0	7	1	7	2	6	16	12
CCNA_01573	NC_011916.1	1689765	1690118	-	354	1	3	6	4	1	1	0	0	0	1	4	2
CCNA_01574	NC_011916.1	1690173	1690907	+	735	20	43	3	13	10	24	128	274	39	75	463	585
CCNA_01575	NC_011916.1	1690968	1692194	-	1227	62	86	55	108	55	126	350	576	6	61	360	902
CCNA_01576	NC_011916.1	1692309	1693604	-	1296	6	20	13	34	5	10	11	8	91	141	3	11
CCNA_01577	NC_011916.1	1693632	1694450	-	819	3	8	1	4	1	4	9	70	15	16	8	8
CCNA_01578	NC_011916.1	1694679	1695041	+	363	1	4	0	2	4	9	1	3	18	48	0	1
CCNA_01579	NC_011916.1	1695303	1696811	+	1509	15	18	5	24	13	22	3	14	29	75	7	21
CCNA_01580	NC_011916.1	1696883	1697533	+	651	1	1	26	97	10	37	4	115	9	162	325	285
CCNA_01581	NC_011916.1	1697642	1697974	+	333	0	1	1	3	0	8	0	1	0	1	1	3
CCNA_01582	NC_011916.1	1698089	1698451	+	363	1	1	0	3	2	1	4	4	0	2	1	1
CCNA_01583	NC_011916.1	1698521	1699561	-	1041	0	5	20	26	27	89	3	9	15	48	437	652
CCNA_03954	NC_011916.1	1699323	1699610	+	288	0	1	0	0	0	0	0	0	0	0	0	0
CCNA_01584	NC_011916.1	1699686	1702070	-	2385	67	88	23	56	32	87	4	22	25	110	18	68
CCNA_R0143	NC_011916.1	1702213	1702292	+	80	0	0	0	0	0	0	0	0	0	0	0	0
CCNA_01585	NC_011916.1	1702356	1704437	-	2082	22	40	6	11	16	32	32	147	7	28	14	26
CCNA_01586	NC_011916.1	1704585	1705310	+	726	16	13	7	41	3	14	32	91	3	1	6	20
CCNA_01587	NC_011916.1	1705307	1706755	+	1449	3	6	1	8	4	13	10	11	4	4	153	228
CCNA_01588	NC_011916.1	1706752	1708107	+	1356	9	15	32	38	16	25	2	7	2	3	3	19
CCNA_01589	NC_011916.1	1708112	1709248	-	1137	24	34	27	17	18	42	15	15	24	31	12	30
CCNA_01590	NC_011916.1	1709381	1711732	+	2352	9	24	47	74	52	78	53	116	44	118	8	22
CCNA_01591	NC_011916.1	1711708	1712337	+	630	1	3	21	55	5	11	0	6	0	4	1	5
CCNA_01592	NC_011916.1	1712453	1712881	+	429	30	68	44	96	8	22	86	166	35	100	8	18
CCNA_01593	NC_011916.1	1713020	1714831	-	1812	50	136	31	67	49	106	343	535	74	152	260	561
CCNA_R0144	NC_011916.1	1714891	1714984	+	94	0	1	0	0	3	2	0	1	0	0	0	2
CCNA_01594	NC_011916.1	1715035	1715901	-	867	3	15	31	95	15	32	67	108	147	199	6	13
CCNA_01595	NC_011916.1	1715941	1716435	-	495	0	1	0	3	10	22	0	3	1	2	21	77
CCNA_01596	NC_011916.1	1716478	1718895	-	2418	27	39	53	100	24	61	159	384	92	208	532	686
CCNA_01597	NC_011916.1	1718983	1719228	-	246	0	1	0	3	7	21	0	5	43	63	2	3
CCNA_01598	NC_011916.1	1719348	1720859	+	1512	68	106	55	130	7	18	266	385	56	112	79	244
CCNA_01599	NC_011916.1	1720927	1721103	-	177	0	1	0	0	3	12	0	1	0	0	0	1
CCNA_01600	NC_011916.1	1721109	1722017	-	909	43	40	3	7	1	7	0	6	80	129	2	19
CCNA_01601	NC_011916.1	1722154	1722390	+	237	10	2	8	2	10	9	4	2	1	1	19	3
CCNA_01602	NC_011916.1	1722517	1723155	+	639	20	29	18	53	11	45	101	118	44	59	0	5
CCNA_01603	NC_011916.1	1723294	1724496	-	1203	96	92	50	105	89	126	88	154	67	117	584	594
CCNA_01604	NC_011916.1	1724760	1725353	+	594	6	6	2	3	0	7	2	16	1	2	1	8
CCNA_01605	NC_011916.1	1725350	1725889	-	540	5	18	5	12	4	11	2	9	0	0	297	283
CCNA_01606	NC_011916.1	1725900	1726562	-	663	2	23	2	4	7	3	2	7	42	44	5	11
CCNA_01607	NC_011916.1	1726781	1727500	+	720	12	35	30	22	9	13	75	93	10	35	3	12
CCNA_01608	NC_011916.1	1727463	1728137	-	675	11	9	8	17	20	27	1	7	2	4	4	13
CCNA_01609	NC_011916.1	1728187	1730142	+	1956	13	33	14	51	10	26	50	146	2	4	9	15
CCNA_03955	NC_011916.1	1730240	1730296	+	57	0	0	0	0	1	0	0	0	0	1	1	1
CCNA_01610	NC_011916.1	1730384	1731958	+	1575	36	70	20	45	7	35	318	368	1	28	519	894
CCNA_01611	NC_011916.1	1732085	1732963	+	879	0	4	51	51	21	22	2	11	2	3	1	5
CCNA_01612	NC_011916.1	1733317	1734360	+	1044	41	120	70	216	53	166	374	801	67	116	77	212
CCNA_01613	NC_011916.1	1734410	1735450	+	1041	56	86	16	26	40	63	176	272	66	137	4	17
CCNA_01614	NC_011916.1	1735447	1735962	+	516	7	17	5	9	1	7	151	203	1	0	2	9
CCNA_01615	NC_011916.1	1735967	1737985	+	2019	17	36	31	65	26	46	19	229	26	71	74	236
CCNA_01616	NC_011916.1	1737982	1739139	+	1158	13	30	3	22	2	16	1	5	22	121	3	9
CCNA_01617	NC_011916.1	1739139	1739690	+	552	1	11	7	27	5	12	1	4	45	68	4	15
CCNA_01618	NC_011916.1	1739738	1740415	-	678	15	96	21	44	5	25	3	7	1	2	97	129
CCNA_01619	NC_011916.1	1740418	1741014	-	597	3	16	2	10	20	28	90	180	0	3	1	2
CCNA_01620	NC_011916.1	1741064	1741558	+	495	4	4	2	3	6	13	2	7	0	27	4	3
CCNA_01621	NC_011916.1	1741687	1742046	+	360	46	95	6	38	59	90	390	840	205	296	977	1760
CCNA_01622	NC_011916.1	1742148	1744376	+	2229	32	65	33	137	24	36	98	307	46	53	12	40
CCNA_01623	NC_011916.1	1744514	1744933	-	420	26	33	32	43	2	10	5	2	1	4	481	593
CCNA_01624	NC_011916.1	1745014	1745598	+	585	23	48	75	178	29	42	151	268	84	151	216	296
CCNA_01625	NC_011916.1	1745770	1747389	-	1620	21	42	8	18	17	36	3	6	4	9	50	307
CCNA_01626	NC_011916.1	1747568	1748332	+	765	4	10	3	24	2	7	66	110	0	4	325	400
CCNA_01627	NC_011916.1	1748329	1748730	+	402	4	27	9	23	9	13	60	125	0	3	0	1
CCNA_01628	NC_011916.1	1748742	1749035	+	294	1	2	1	2	1	2	1	3	0	0	270	240
CCNA_01629	NC_011916.1	1749159	1750004	+	846	14	43	9	63	38	74	60	295	73	63	2	9
CCNA_01630	NC_011916.1	1750026	1750721	+	696	11	37	51	96	2	21	68	93	1	1	10	16
CCNA_01632	NC_011916.1	1751025	1751486	-	462	6	9	3	23	1	7	1	1	1	1	0	2
CCNA_01633	NC_011916.1	1751636	1752586	+	951	5	6	21	58	13	51	184	379	89	117	115	453
CCNA_01634	NC_011916.1	1752579	1753430	+	852	5	16	85	89	10	36	60	256	0	4	170	330
CCNA_01635	NC_011916.1	1753433	1754164	+	732	6	6	21	33	4	6	0	11	0	3	2	14
CCNA_01636	NC_011916.1	1754218	1755804	+	1587	15	30	5	44	38	81	64	374	47	119	198	547
CCNA_01637	NC_011916.1	1755866	1758145	+	2280	44	88	108	222	108	156	255	625	217	413	598	1192
CCNA_01638	NC_011916.1	1758142	1759530	+	1389	85	107	7	54	16	52	95	170	84	205	8	23
CCNA_01639	NC_011916.1	1759642	1760952	+	1311	73	74	8	13	15	22	5	4	2	2	7	18
CCNA_01640	NC_011916.1	1760990	1761952	+	963	31	36	23	49	5	11	0	8	0	1	7	16
CCNA_01641	NC_011916.1	1761961	1762896	+	936	0	3	0	6	16	23	1	7	0	5	1	4
CCNA_01642	NC_011916.1	1762909	1763676	+	768	4	8	1	14	3	8	12	26	25	43	2	12
CCNA_01643	NC_011916.1	1763716	1764555	-	840	6	20	2	6	2	15	1	15	15	118	199	348
CCNA_01644	NC_011916.1	1764656	1765552	-	897	29	99	55	170	26	67	276	446	5	131	1	10
CCNA_01645	NC_011916.1	1765667	1766527	+	861	5	22	50	72	12	32	20	136	0	2	217	370
CCNA_01646	NC_011916.1	1766524	1767183	-	660	5	2	4	5	3	13	5	8	0	6	3	20
CCNA_01647	NC_011916.1	1767180	1768334	-	1155	2	18	2	9	16	44	138	246	36	112	22	483
CCNA_01648	NC_011916.1	1768405	1769667	+	1263	24	59	12	50	15	31	2	5	4	2	2	12
CCNA_01649	NC_011916.1	1769664	1770605	+	942	5	11	3	12	27	45	41	54	3	11	79	95
CCNA_01650	NC_011916.1	1770655	1771179	-	525	6	5	6	48	9	21	6	9	3	4	274	467
CCNA_01651	NC_011916.1	1771304	1774063	+	2760	114	226	68	129	104	178	599	1220	221	602	167	337
CCNA_01652	NC_011916.1	1774090	1774581	+	492	22	40	14	25	31	41	1	1	64	134	194	702
CCNA_01653	NC_011916.1	1774739	1775572	+	834	7	13	41	53	33	61	94	111	123	225	248	345
CCNA_01654	NC_011916.1	1775569	1776417	+	849	12	23	2	8	0	7	4	1	0	1	4	8
CCNA_01655	NC_011916.1	1776509	1776976	+	468	52	79	68	73	27	102	313	595	74	149	67	377
CCNA_01656	NC_011916.1	1777143	1778120	-	978	6	41	16	30	29	42	28	102	1	6	9	38
CCNA_01657	NC_011916.1	1778162	1778806	-	645	1	3	28	60	12	14	172	208	0	2	4	2
CCNA_01658	NC_011916.1	1778893	1779993	+	1101	16	27	12	13	9	15	55	179	1	9	348	369
CCNA_01659	NC_011916.1	1779993	1781108	+	1116	18	17	12	30	9	29	123	180	5	77	10	7
CCNA_01660	NC_011916.1	1781219	1781911	-	693	0	5	2	6	3	18	0	2	25	34	10	63
CCNA_R0041	NC_011916.1	1782039	1782113	+	75	21	21	4	11	13	24	0	0	0	0	0	3
CCNA_01663	NC_011916.1	1782651	1784363	+	1713	13	84	14	71	5	32	0	6	57	153	7	21
CCNA_01664	NC_011916.1	1784375	1786435	+	2061	8	11	13	19	12	20	9	19	8	89	6	34
CCNA_01665	NC_011916.1	1786463	1787056	+	594	8	15	20	103	9	32	1	4	14	38	4	15
CCNA_01666	NC_011916.1	1787056	1789734	+	2679	23	36	60	101	19	31	367	460	8	19	11	43
CCNA_01667	NC_011916.1	1789742	1790440	+	699	2	13	9	18	2	12	1	4	1	2	2	8
CCNA_01668	NC_011916.1	1790704	1791576	+	873	5	7	1	5	6	12	74	156	1	8	3	6
CCNA_01669	NC_011916.1	1791576	1792433	+	858	8	4	7	24	2	15	1	2	1	3	3	6
CCNA_01670	NC_011916.1	1792450	1793469	+	1020	4	9	2	17	8	28	29	38	6	15	5	12
CCNA_01671	NC_011916.1	1793574	1793930	+	357	21	29	1	8	20	29	0	8	28	88	329	307
CCNA_01672	NC_011916.1	1794029	1795006	-	978	0	19	5	29	13	13	81	305	1	0	12	11
CCNA_01673	NC_011916.1	1795018	1795965	-	948	12	15	3	9	11	34	1	11	5	3	3	5
CCNA_01674	NC_011916.1	1795962	1797482	-	1521	2	13	19	20	18	43	97	151	1	8	9	16
CCNA_01675	NC_011916.1	1797735	1799519	+	1785	70	95	16	45	35	63	335	644	32	72	130	501
CCNA_01676	NC_011916.1	1799591	1803712	+	4122	61	141	69	133	51	107	113	488	74	176	30	699
CCNA_01677	NC_011916.1	1803814	1805058	+	1245	29	111	20	135	55	90	287	542	110	282	240	814
CCNA_01678	NC_011916.1	1805059	1806063	+	1005	68	135	60	96	49	123	363	552	179	378	399	371
CCNA_01679	NC_011916.1	1806060	1807517	+	1458	42	123	132	193	93	134	145	382	165	309	201	701
CCNA_01680	NC_011916.1	1807514	1808854	+	1341	24	51	18	42	27	38	226	500	165	380	205	295
CCNA_01681	NC_011916.1	1808851	1809357	+	507	1	3	4	7	3	13	0	6	0	3	300	679
CCNA_01682	NC_011916.1	1809354	1810292	-	939	8	32	16	32	10	27	90	88	34	82	9	17
CCNA_01683	NC_011916.1	1810291	1811511	+	1221	39	36	0	8	4	12	1	6	2	5	162	177
CCNA_01684	NC_011916.1	1811466	1812350	-	885	36	70	76	188	49	115	88	390	100	257	737	1046
CCNA_01685	NC_011916.1	1812515	1812844	-	330	19	38	8	13	0	9	59	116	1	3	195	275
CCNA_01686	NC_011916.1	1813006	1814112	+	1107	19	25	1	12	18	27	30	100	2	1	5	11
CCNA_01687	NC_011916.1	1814109	1814819	+	711	4	13	19	48	30	29	1	5	17	87	19	42
CCNA_01688	NC_011916.1	1814816	1815859	+	1044	21	25	12	18	6	26	2	16	0	5	255	286
CCNA_01689	NC_011916.1	1815952	1817415	+	1464	139	209	91	212	77	170	492	710	138	414	1219	2363
CCNA_01690	NC_011916.1	1817419	1817814	+	396	19	19	17	21	26	46	121	176	37	49	2	8
CCNA_01691	NC_011916.1	1817814	1819091	+	1278	13	23	38	63	31	66	7	15	0	6	218	419
CCNA_01692	NC_011916.1	1819124	1820686	+	1563	42	65	75	143	53	137	137	310	25	74	491	966
CCNA_01693	NC_011916.1	1820814	1821710	-	897	14	24	79	109	6	13	3	5	0	1	27	295
CCNA_01694	NC_011916.1	1821724	1823658	-	1935	61	114	91	106	28	50	4	5	24	45	377	571
CCNA_01695	NC_011916.1	1823677	1826589	-	2913	18	54	15	39	29	46	130	138	25	50	30	57
CCNA_01696	NC_011916.1	1826794	1828470	-	1677	2	18	4	9	15	48	10	95	4	8	280	214
CCNA_01697	NC_011916.1	1828520	1829644	+	1125	3	16	5	15	9	17	6	17	1	6	8	18
CCNA_01698	NC_011916.1	1829731	1830516	+	786	5	17	3	2	7	23	49	82	1	1	4	6
CCNA_01699	NC_011916.1	1830513	1831520	-	1008	1	13	20	26	1	8	16	37	3	5	38	181
CCNA_01700	NC_011916.1	1831698	1832939	+	1242	7	25	14	33	8	13	4	6	4	113	14	16
CCNA_01701	NC_011916.1	1832940	1833926	+	987	2	7	2	12	10	18	2	8	3	9	8	169
CCNA_01702	NC_011916.1	1833926	1835056	+	1131	2	19	24	42	4	14	3	7	0	7	136	260
CCNA_01703	NC_011916.1	1835056	1836111	+	1056	9	19	19	66	11	15	30	47	1	5	228	220
CCNA_01704	NC_011916.1	1836139	1836501	+	363	0	6	1	3	4	15	0	3	0	1	0	0
CCNA_01705	NC_011916.1	1836721	1837566	-	846	1	4	6	12	15	21	40	59	3	1	2	5
CCNA_01706	NC_011916.1	1837718	1839457	+	1740	36	66	21	41	2	12	2	63	3	17	167	201
CCNA_01707	NC_011916.1	1839457	1840005	+	549	7	0	14	13	11	0	87	268	1	0	2	4
CCNA_01708	NC_011916.1	1840110	1840661	+	552	1	3	2	2	3	18	0	5	2	157	0	8
CCNA_01709	NC_011916.1	1840745	1841074	-	330	1	2	4	7	2	6	1	0	1	3	0	3
CCNA_01710	NC_011916.1	1841077	1842606	-	1530	12	24	35	90	21	47	3	13	3	6	7	22
CCNA_01711	NC_011916.1	1842780	1844255	-	1476	41	73	24	31	14	32	6	76	5	7	8	17
CCNA_01712	NC_011916.1	1844245	1844628	-	384	3	7	38	57	14	7	0	1	0	2	1	0
CCNA_01713	NC_011916.1	1844752	1845330	+	579	12	24	0	1	2	12	1	4	1	1	0	4
CCNA_03956	NC_011916.1	1845242	1845427	-	186	6	10	13	25	0	0	0	0	0	0	0	1
CCNA_01714	NC_011916.1	1845426	1845773	+	348	2	3	8	6	0	2	2	1	0	0	2	4
CCNA_01715	NC_011916.1	1845879	1846565	+	687	32	70	2	11	11	12	1	3	48	56	4	10
CCNA_01716	NC_011916.1	1846602	1846787	+	186	2	11	2	8	8	16	0	1	15	61	0	0
CCNA_01717	NC_011916.1	1846800	1847210	+	411	1	0	10	21	12	36	1	2	0	1	198	172
CCNA_01718	NC_011916.1	1847210	1847725	+	516	3	3	6	24	8	8	1	3	69	94	3	5
CCNA_01719	NC_011916.1	1847722	1848030	+	309	3	3	2	5	8	7	2	6	1	5	6	98
CCNA_03893	NC_011916.1	1848134	1848526	+	393	1	12	5	2	4	6	2	1	68	79	376	764
CCNA_01721	NC_011916.1	1848549	1849133	+	585	2	16	1	6	8	25	1	2	1	2	1	3
CCNA_01722	NC_011916.1	1849102	1849506	+	405	5	12	0	3	0	5	0	3	0	1	2	3
CCNA_01723	NC_011916.1	1849599	1850426	+	828	9	46	36	40	11	23	11	169	29	60	3	11
CCNA_01724	NC_011916.1	1850579	1851331	+	753	71	145	42	66	28	59	348	631	138	200	283	610
CCNA_01725	NC_011916.1	1851328	1852758	+	1431	102	139	154	239	133	267	508	934	99	416	919	1455
CCNA_01726	NC_011916.1	1852884	1854650	+	1767	39	82	115	184	53	116	2	13	3	5	408	397
CCNA_01727	NC_011916.1	1854729	1856234	-	1506	13	23	57	57	26	35	9	17	3	8	10	36
CCNA_01728	NC_011916.1	1856420	1857175	-	756	7	19	5	49	36	41	310	394	1	4	19	225
CCNA_01729	NC_011916.1	1857224	1858237	-	1014	20	28	12	37	27	53	74	101	46	55	20	10
CCNA_01730	NC_011916.1	1858257	1859759	-	1503	66	110	15	39	79	142	159	525	139	226	567	845
CCNA_01731	NC_011916.1	1859756	1860373	-	618	23	115	31	35	4	32	29	149	105	194	47	121
CCNA_01732	NC_011916.1	1860370	1861752	-	1383	3	51	18	77	28	64	160	180	56	110	1518	1556
CCNA_01733	NC_011916.1	1861826	1862920	-	1095	7	22	9	56	6	20	3	6	0	6	101	167
CCNA_01734	NC_011916.1	1862960	1863646	-	687	4	10	1	8	12	8	0	4	102	143	3	11
CCNA_01735	NC_011916.1	1863704	1864189	-	486	1	29	0	6	0	10	1	5	0	3	0	16
CCNA_01736	NC_011916.1	1864287	1864886	+	600	4	9	1	6	0	9	32	57	0	3	2	7
CCNA_01737	NC_011916.1	1864901	1866424	-	1524	18	22	14	37	12	9	78	229	0	1	60	79
CCNA_01738	NC_011916.1	1866634	1869063	-	2430	115	178	94	194	99	126	272	378	188	327	627	817
CCNA_01739	NC_011916.1	1869268	1869852	-	585	241	474	366	507	299	522	1873	3579	246	718	1532	1869
CCNA_01740	NC_011916.1	1869866	1870144	-	279	232	452	164	376	283	514	1754	4208	644	1044	1541	2067
CCNA_01741	NC_011916.1	1870159	1870539	-	381	247	515	299	608	327	644	735	1840	357	902	1958	3311
CCNA_01742	NC_011916.1	1870808	1871467	+	660	20	34	9	20	18	56	284	277	0	81	59	201
CCNA_01743	NC_011916.1	1871442	1872251	-	810	4	5	10	12	1	1	1	4	29	86	2	6
CCNA_01744	NC_011916.1	1872325	1873437	-	1113	4	10	1	11	26	28	157	229	2	4	30	284
CCNA_01745	NC_011916.1	1873509	1874042	-	534	19	26	2	3	25	30	171	302	54	69	9	110
CCNA_01746	NC_011916.1	1874210	1875154	+	945	36	44	81	188	22	61	234	217	140	210	36	222
CCNA_01747	NC_011916.1	1875173	1875913	+	741	3	35	21	75	39	55	170	349	82	271	899	1275
CCNA_01748	NC_011916.1	1875935	1876864	+	930	13	30	63	93	14	83	34	207	4	89	3	10
CCNA_01749	NC_011916.1	1877029	1877265	+	237	78	211	114	281	121	223	447	923	234	671	1180	1962
CCNA_01750	NC_011916.1	1877432	1878712	+	1281	60	115	63	141	44	118	398	576	132	213	338	682
CCNA_01751	NC_011916.1	1878709	1879809	+	1101	32	67	15	43	16	50	206	376	65	148	343	330
CCNA_01752	NC_011916.1	1879813	1880694	+	882	11	20	23	91	20	27	134	259	3	72	4	17
CCNA_01753	NC_011916.1	1880687	1881328	+	642	34	77	20	57	10	18	1	3	1	1	3	6
CCNA_01754	NC_011916.1	1881367	1881672	-	306	5	12	3	33	2	10	1	2	0	0	5	15
CCNA_01755	NC_011916.1	1881785	1883437	-	1653	16	25	21	80	8	35	298	430	116	287	326	332
CCNA_01756	NC_011916.1	1883535	1883654	-	120	0	1	1	3	0	0	108	82	0	2	0	3
CCNA_01757	NC_011916.1	1883718	1884548	-	831	14	18	24	41	4	25	113	142	4	2	2	7
CCNA_01758	NC_011916.1	1884593	1885594	-	1002	48	56	3	28	1	7	65	91	70	151	12	27
CCNA_01759	NC_011916.1	1885591	1886940	-	1350	92	162	38	154	24	84	150	342	55	222	464	1450
CCNA_01760	NC_011916.1	1887107	1889536	-	2430	38	92	80	198	92	216	75	117	42	72	1005	1217
CCNA_01761	NC_011916.1	1889529	1890635	-	1107	9	25	38	60	7	28	30	219	46	77	262	650
CCNA_01762	NC_011916.1	1890632	1891771	-	1140	19	44	3	7	17	29	49	81	1	3	37	296
CCNA_01763	NC_011916.1	1891999	1893480	+	1482	15	26	128	184	46	121	162	483	68	166	177	452
CCNA_01764	NC_011916.1	1893601	1894062	+	462	18	31	4	9	15	24	112	144	19	46	363	328
CCNA_01765	NC_011916.1	1894059	1894400	+	342	0	5	11	25	5	14	3	11	0	2	0	10
CCNA_01766	NC_011916.1	1894443	1895228	-	786	14	43	2	47	11	27	8	112	0	1	289	300
CCNA_01767	NC_011916.1	1895423	1895821	+	399	2	1	18	18	1	0	0	2	45	115	0	1
CCNA_01768	NC_011916.1	1895834	1896232	-	399	8	12	0	3	4	11	1	2	14	44	3	2
CCNA_01769	NC_011916.1	1896310	1898175	-	1866	5	16	33	94	6	24	8	19	4	9	5	16
CCNA_01770	NC_011916.1	1898272	1898691	+	420	51	67	108	163	99	169	489	686	209	313	46	85
CCNA_01771	NC_011916.1	1898688	1898930	-	243	0	1	38	37	1	4	0	1	1	1	0	2
CCNA_01772	NC_011916.1	1899035	1899412	+	378	0	4	0	2	1	3	84	92	0	5	3	7
CCNA_01773	NC_011916.1	1899409	1900026	-	618	0	2	17	17	2	5	1	4	1	6	5	9
CCNA_01774	NC_011916.1	1900105	1900686	-	582	17	48	28	106	25	53	3	7	0	2	3	9
CCNA_01775	NC_011916.1	1900847	1901872	-	1026	47	62	22	60	21	47	230	317	39	60	23	270
CCNA_01776	NC_011916.1	1901998	1903167	+	1170	57	96	35	105	64	131	523	759	47	98	729	951
CCNA_01777	NC_011916.1	1903417	1905099	+	1683	36	62	26	53	47	90	194	211	95	131	5	21
CCNA_01778	NC_011916.1	1905204	1906496	+	1293	25	47	18	34	16	60	54	68	50	82	13	15
CCNA_01779	NC_011916.1	1906529	1906798	-	270	1	2	0	1	1	3	0	2	0	2	82	411
CCNA_01780	NC_011916.1	1906954	1908453	-	1500	17	33	8	38	6	24	25	213	3	5	220	660
CCNA_01781	NC_011916.1	1908544	1908939	-	396	1	3	31	132	10	14	108	130	1	3	6	10
CCNA_01782	NC_011916.1	1908936	1911152	-	2217	33	49	53	118	41	69	66	190	1	6	209	367
CCNA_R0145	NC_011916.1	1911195	1911615	+	421	0	15	0	1	1	2	0	0	0	0	25	22
CCNA_01783	NC_011916.1	1911358	1912050	-	693	14	20	6	34	17	23	1	6	3	89	3	12
CCNA_01784	NC_011916.1	1912227	1912619	-	393	0	2	0	2	3	13	0	0	0	1	0	0
CCNA_01785	NC_011916.1	1912486	1913097	-	612	1	7	0	0	3	8	2	0	31	65	0	0
CCNA_01786	NC_011916.1	1913996	1914736	+	741	27	41	20	30	9	26	60	153	37	114	9	14
CCNA_01787	NC_011916.1	1914921	1915856	-	936	6	4	2	10	3	6	46	57	1	12	51	48
CCNA_R0042	NC_011916.1	1915870	1916013	+	144	7	5	3	4	6	6	20	53	0	0	17	73
CCNA_01788	NC_011916.1	1916111	1916470	-	360	8	8	4	9	4	12	1	1	9	8	55	58
CCNA_01789	NC_011916.1	1916649	1917164	-	516	4	18	0	5	0	8	1	5	21	57	409	557
CCNA_01790	NC_011916.1	1917304	1917771	+	468	27	64	27	49	25	60	131	209	57	117	25	299
CCNA_01791	NC_011916.1	1917887	1919539	+	1653	60	89	125	151	65	124	418	820	114	211	163	192
CCNA_01792	NC_011916.1	1919654	1919836	+	183	19	14	48	53	23	71	78	177	0	4	13	23
CCNA_01793	NC_011916.1	1919960	1920958	+	999	4	4	32	38	26	46	3	116	154	153	5	10
CCNA_01794	NC_011916.1	1920971	1921741	-	771	1	4	3	5	3	6	1	4	1	2	2	9
CCNA_01795	NC_011916.1	1921855	1923135	+	1281	83	161	151	167	94	251	662	1389	571	750	957	2080
CCNA_01797	NC_011916.1	1923489	1923791	+	303	39	70	28	79	38	67	90	191	60	62	105	184
CCNA_01799	NC_011916.1	1923957	1924988	+	1032	189	353	240	346	200	376	690	1685	316	557	1171	2040
CCNA_01800	NC_011916.1	1924985	1926337	+	1353	161	250	133	191	147	312	593	1447	215	450	1110	1399
CCNA_01801	NC_011916.1	1926343	1926795	+	453	10	5	147	182	78	121	402	676	64	126	495	618
CCNA_R0146	NC_011916.1	1926680	1926746	-	67	0	0	0	0	0	0	0	0	0	0	0	0
CCNA_01802	NC_011916.1	1926792	1926908	+	117	0	0	12	25	4	4	0	0	0	0	0	0
CCNA_01803	NC_011916.1	1926921	1928207	+	1287	90	160	222	288	88	126	256	286	336	401	237	662
CCNA_01804	NC_011916.1	1928226	1928708	+	483	1	8	14	37	7	51	25	114	0	3	151	294
CCNA_01805	NC_011916.1	1928791	1930191	+	1401	113	121	69	115	64	138	308	686	215	308	750	1215
CCNA_01806	NC_011916.1	1930211	1931668	+	1458	10	47	6	17	10	36	49	202	28	46	5	20
CCNA_01807	NC_011916.1	1931701	1933254	-	1554	4	17	60	150	22	45	6	8	105	131	67	311
CCNA_01808	NC_011916.1	1933343	1934419	-	1077	8	23	4	14	7	15	6	9	69	97	9	29
CCNA_01809	NC_011916.1	1934502	1935479	+	978	18	56	77	127	35	79	87	245	74	94	357	635
CCNA_01810	NC_011916.1	1935483	1935929	+	447	4	9	0	3	1	10	0	0	0	0	0	5
CCNA_01811	NC_011916.1	1935926	1936417	-	492	4	41	1	2	1	5	70	141	0	1	1	6
CCNA_01812	NC_011916.1	1936456	1937604	-	1149	7	15	5	8	14	72	1	6	4	8	79	189
CCNA_01813	NC_011916.1	1937704	1938711	+	1008	27	24	102	69	26	48	14	135	94	210	8	22
CCNA_01814	NC_011916.1	1938708	1939829	+	1122	3	11	55	45	6	23	5	16	30	94	69	334
CCNA_01815	NC_011916.1	1939826	1941247	+	1422	5	17	16	28	4	9	148	294	130	213	155	740
CCNA_01816	NC_011916.1	1941312	1943555	+	2244	36	67	58	84	25	87	33	184	31	53	360	494
CCNA_01817	NC_011916.1	1943552	1944940	+	1389	1	9	13	35	54	78	214	295	0	16	2	13
CCNA_01818	NC_011916.1	1944941	1945804	+	864	40	28	35	41	33	58	12	40	0	5	349	365
CCNA_01819	NC_011916.1	1945962	1946210	+	249	14	31	61	102	49	68	173	334	6	77	230	215
CCNA_01820	NC_011916.1	1946223	1947563	+	1341	36	78	25	97	27	75	31	145	31	224	451	702
CCNA_01821	NC_011916.1	1947560	1948387	-	828	2	1	2	9	7	26	1	7	34	56	6	6
CCNA_01822	NC_011916.1	1948350	1949762	-	1413	11	78	22	34	22	41	2	10	2	3	6	16
CCNA_01823	NC_011916.1	1950040	1950258	-	219	0	0	0	2	1	2	9	19	1	0	0	1
CCNA_01824	NC_011916.1	1950334	1950669	-	336	2	4	1	2	0	0	1	2	0	0	17	15
CCNA_01826	NC_011916.1	1951298	1953250	+	1953	1263	2521	1657	3466	1628	3218	8761	16528	3516	6257	12653	19811
CCNA_01827	NC_011916.1	1953316	1954770	+	1455	56	115	97	315	176	279	930	1505	109	338	1392	1488
CCNA_01828	NC_011916.1	1954767	1955342	-	576	0	19	0	1	12	19	61	151	0	2	1	4
CCNA_01829	NC_011916.1	1955493	1956539	+	1047	28	31	14	33	22	46	125	228	3	2	7	16
CCNA_01830	NC_011916.1	1956674	1959535	+	2862	5	15	47	61	16	43	9	29	7	23	16	41
CCNA_01831	NC_011916.1	1959650	1961173	+	1524	3	10	6	29	27	54	44	74	3	3	6	11
CCNA_01832	NC_011916.1	1961197	1963485	+	2289	8	20	7	15	11	52	154	319	33	93	22	31
CCNA_01833	NC_011916.1	1963485	1964894	+	1410	25	16	25	31	31	25	2	11	2	8	13	25
CCNA_01834	NC_011916.1	1965009	1967531	-	2523	28	40	36	40	28	30	139	258	11	21	43	79
CCNA_01835	NC_011916.1	1967528	1968214	-	687	32	27	9	4	8	17	1	14	0	1	10	26
CCNA_01836	NC_011916.1	1968272	1968904	+	633	13	12	17	38	7	35	6	9	0	3	3	6
CCNA_01837	NC_011916.1	1969053	1970081	-	1029	9	26	23	57	4	20	1	1	0	10	40	68
CCNA_01840	NC_011916.1	1970882	1972324	-	1443	28	43	39	88	15	34	112	129	102	159	96	375
CCNA_01841	NC_011916.1	1972490	1974109	+	1620	2	5	30	60	14	27	48	130	2	3	9	13
CCNA_01842	NC_011916.1	1974143	1974370	+	228	0	1	0	2	2	3	4	5	0	1	1	5
CCNA_01843	NC_011916.1	1974451	1976028	+	1578	7	15	35	53	12	21	13	12	1	8	207	346
CCNA_01844	NC_011916.1	1976177	1976803	-	627	2	3	59	43	0	3	2	4	31	19	2	11
CCNA_01845	NC_011916.1	1977086	1977619	-	534	0	2	0	1	0	1	0	1	2	3	1	2
CCNA_01846	NC_011916.1	1977612	1978958	-	1347	7	9	25	46	24	44	3	6	2	8	13	333
CCNA_01847	NC_011916.1	1978955	1979692	-	738	11	27	24	39	0	18	3	9	1	3	204	244
CCNA_01848	NC_011916.1	1979689	1980078	-	390	0	2	19	20	8	15	2	80	0	2	2	4
CCNA_01849	NC_011916.1	1980075	1980701	-	627	1	3	9	105	1	4	60	281	9	70	4	14
CCNA_01850	NC_011916.1	1980704	1982701	-	1998	34	123	62	148	33	56	211	263	110	255	555	683
CCNA_01851	NC_011916.1	1982720	1983781	-	1062	36	75	38	95	18	26	30	54	5	11	616	642
CCNA_01852	NC_011916.1	1983992	1985332	+	1341	10	29	3	3	8	15	3	16	46	57	3	37
CCNA_01853	NC_011916.1	1985425	1985829	+	405	57	41	73	84	17	39	119	451	126	193	45	496
CCNA_01854	NC_011916.1	1985974	1986639	+	666	14	19	40	81	42	77	125	133	134	174	298	708
CCNA_R0147	NC_011916.1	1986625	1986741	+	117	12	15	1	1	0	0	0	1	0	0	0	2
CCNA_01855	NC_011916.1	1986769	1987485	+	717	30	52	1	5	12	26	4	2	26	88	5	14
CCNA_01856	NC_011916.1	1987428	1989626	+	2199	55	152	117	282	86	244	602	895	294	440	1477	2390
CCNA_01857	NC_011916.1	1989653	1990909	+	1257	5	26	33	49	34	65	2	12	47	129	54	165
CCNA_01858	NC_011916.1	1990867	1991769	+	903	45	33	10	39	31	62	67	199	1	3	4	14
CCNA_01859	NC_011916.1	1991852	1993885	+	2034	103	220	247	393	180	305	458	814	139	263	830	1402
CCNA_01860	NC_011916.1	1993888	1995033	+	1146	16	26	29	53	42	87	51	141	1	19	362	1983
CCNA_01861	NC_011916.1	1995291	1996484	+	1194	22	52	4	14	10	17	95	174	67	97	305	377
CCNA_01862	NC_011916.1	1996891	1997184	-	294	1	2	0	0	2	14	0	0	0	0	0	1
CCNA_R0148	NC_011916.1	1997162	1997282	+	121	0	0	0	0	0	0	0	0	0	0	0	0
CCNA_01863	NC_011916.1	1997194	1998630	-	1437	31	59	30	74	0	9	26	101	25	59	8	15
CCNA_01864	NC_011916.1	1998726	1999349	+	624	5	35	17	25	13	16	0	1	2	0	98	124
CCNA_01865	NC_011916.1	1999438	2000526	+	1089	7	19	38	60	7	29	5	18	38	87	7	24
CCNA_01866	NC_011916.1	2000523	2003621	+	3099	27	59	45	79	31	40	19	29	5	7	9	27
CCNA_R0149	NC_011916.1	2003589	2003693	+	105	0	0	0	1	0	0	0	0	0	0	0	0
CCNA_03894	NC_011916.1	2003815	2005050	-	1236	12	17	43	61	16	49	19	64	4	14	187	325
CCNA_01868	NC_011916.1	2005193	2005987	-	795	1	8	3	8	2	17	3	3	3	7	9	13
CCNA_01869	NC_011916.1	2005990	2008671	-	2682	7	21	64	44	17	23	10	13	139	223	31	36
CCNA_01870	NC_011916.1	2008780	2009934	-	1155	9	22	7	16	13	20	6	13	1	7	9	20
CCNA_03895	NC_011916.1	2009954	2010232	-	279	0	1	2	5	1	0	1	1	6	3	1	3
CCNA_01873	NC_011916.1	2010241	2010474	+	234	0	1	0	0	8	13	1	3	0	1	1	3
CCNA_01874	NC_011916.1	2010768	2012213	-	1446	11	33	9	39	11	30	5	79	10	85	21	43
CCNA_01875	NC_011916.1	2012838	2013983	+	1146	3	7	27	29	2	6	0	11	1	1	4	10
CCNA_01876	NC_011916.1	2014046	2015716	-	1671	17	39	20	58	15	31	28	165	1	4	31	42
CCNA_01877	NC_011916.1	2015915	2016775	+	861	8	20	19	19	1	12	0	2	1	2	1	5
CCNA_01878	NC_011916.1	2016779	2018377	-	1599	1	10	0	14	3	11	3	11	46	77	9	16
CCNA_01879	NC_011916.1	2018600	2019703	+	1104	14	15	1	10	2	7	5	11	45	90	7	17
CCNA_01880	NC_011916.1	2019780	2020523	+	744	4	7	0	4	2	4	1	6	1	6	1	5
CCNA_01881	NC_011916.1	2020520	2021158	+	639	29	29	7	22	19	29	2	7	29	33	4	8
CCNA_01882	NC_011916.1	2021155	2022036	+	882	3	11	2	3	4	13	4	14	0	4	2	4
CCNA_01883	NC_011916.1	2022050	2023222	+	1173	3	9	13	20	2	16	0	4	4	2	4	12
CCNA_01884	NC_011916.1	2023230	2024378	+	1149	4	9	5	7	2	13	6	13	22	38	362	344
CCNA_01885	NC_011916.1	2024476	2025252	-	777	3	9	7	21	0	4	117	138	3	4	7	13
CCNA_01886	NC_011916.1	2025426	2028326	-	2901	14	36	10	16	3	12	32	79	6	117	10	23
CCNA_01888	NC_011916.1	2028496	2029269	+	774	1	3	2	4	1	7	1	10	1	4	1	8
CCNA_01889	NC_011916.1	2029278	2030912	-	1635	15	13	8	20	6	17	1	8	0	2	6	20
CCNA_01890	NC_011916.1	2031155	2032660	+	1506	3	12	13	23	20	32	2	19	4	11	6	17
CCNA_01891	NC_011916.1	2032774	2033601	-	828	2	2	2	6	4	13	1	10	0	3	0	6
CCNA_01892	NC_011916.1	2033679	2035319	+	1641	10	10	35	45	5	20	51	211	2	6	35	59
CCNA_01893	NC_011916.1	2035334	2035876	+	543	1	7	7	4	1	4	1	4	0	1	1	10
CCNA_01894	NC_011916.1	2035926	2037557	-	1632	9	16	23	31	13	23	6	9	5	6	14	17
CCNA_01895	NC_011916.1	2037657	2039096	+	1440	13	20	3	10	12	22	5	9	4	5	10	26
CCNA_R0150	NC_011916.1	2039150	2039245	+	96	0	0	0	0	1	0	0	0	1	0	0	0
CCNA_01896	NC_011916.1	2039570	2039776	-	207	0	1	0	2	0	0	0	1	0	0	0	3
CCNA_01897	NC_011916.1	2040047	2040853	-	807	2	6	10	23	2	12	1	5	0	5	256	319
[truncated: 2,099 more rows]

## Sheet: SA rRNA and mRNA reads
						PETRI-seq				RiboD-PETRI						Non-rRNA ratio
Geneid	Chr	Start	End	Strand	Length	0119-E.r1	0119-E.r2	0119-F.r1	0119-F.r2	0612-1.r1	0612-1.r2	0612-2.r1	0612-2.r2			S. aureus Ctrl	S. aureus ΔΔ
KQ76_00005	CP009361.1	544	1905	+	1362	13	15	19	22	5217	4957	4513	4379			0.1014	0.8875
KQ76_00010	CP009361.1	2183	3316	+	1134	20	8	25	10	5362	5545	4155	4161			0.0987	0.9579
KQ76_00015	CP009361.1	3706	3942	+	237	0	2	0	1	1060	1142	848	885
KQ76_00020	CP009361.1	3939	5051	+	1113	14	6	19	6	5745	5602	4774	4677
KQ76_00025	CP009361.1	5061	6995	+	1935	15	10	28	15	10870	10752	8933	8689
KQ76_00030	CP009361.1	7032	9692	+	2661	22	18	98	67	10353	10665	10476	10274
KQ76_00035	CP009361.1	9780	10592	-	813	31	23	5	13	1104	1170	1234	1245
KQ76_00040	CP009361.1	10918	12432	+	1515	8	6	16	8	1062	1074	1004	999
KQ76_00045	CP009361.1	12810	14096	+	1287	28	18	76	32	6689	6716	6775	6691
KQ76_00050	CP009361.1	14740	15435	+	696	8	4	23	15	1514	1569	492	508
KQ76_00055	CP009361.1	15432	15761	+	330	3	4	6	3	966	965	1088	1081
KQ76_00060	CP009361.1	16123	17091	+	969	13	4	10	6	824	883	690	763
KQ76_00065	CP009361.1	17399	18322	+	924	0	8	10	12	2105	2042	2083	2012
KQ76_00070	CP009361.1	18337	20304	+	1968	6	6	50	9	6959	7102	7291	7880
KQ76_00075	CP009361.1	20301	20747	+	447	0	6	4	2	2828	2870	2253	2320
KQ76_00080	CP009361.1	20779	22179	+	1401	8	4	5	14	6333	6624	5859	5805
KQ76_00085	CP009361.1	22458	23741	+	1284	3	9	11	17	1628	1676	906	911
KQ76_00090	CP009361.1	24171	24245	+	75	152	288	0	4	1104	1221	471	577
KQ76_00095	CP009361.1	24253	24325	+	73	1	2	223	231	766	1179	537	590
KQ76_00100	CP009361.1	24931	25632	+	702	7	0	6	7	4720	4979	3142	3150
KQ76_00105	CP009361.1	25645	27501	+	1857	712	711	32	15	9249	9235	8122	8000
KQ76_00110	CP009361.1	27494	28828	+	1335	7	11	30	11	5305	5126	4511	4279
KQ76_00115	CP009361.1	28829	29617	+	789	5	1	11	7	3479	3621	3781	3738
KQ76_00120	CP009361.1	30005	30805	+	801	9	2	8	6	507	577	569	602
KQ76_00125	CP009361.1	31032	33350	+	2319	40	23	42	25	8865	9248	7761	7484
KQ76_00130	CP009361.1	33718	34197	+	480	4	2	7	6	1150	1269	1472	1708
KQ76_00135	CP009361.1	34317	36437	+	2121	221	124	302	164	4760	4768	4493	4366
KQ76_00140	CP009361.1	36686	36967	+	282	4	0	4	2	635	664	328	330
KQ76_00145	CP009361.1	37009	37815	+	807	25	12	41	48	1600	1592	1379	1335
KQ76_00150	CP009361.1	38003	38518	+	516	25	3	17	6	577	581	484	449
KQ76_00155	CP009361.1	38523	39470	-	948	5	3	2	6	448	474	363	391
KQ76_00160	CP009361.1	39656	40030	+	375	5	4	5	7	98	76	167	141
KQ76_00165	CP009361.1	40320	42020	+	1701	20	12	20	32	683	658	917	842
KQ76_00170	CP009361.1	42013	43053	+	1041	7	7	23	16	322	312	504	508
KQ76_00180	CP009361.1	43950	44081	-	132	1	0	0	1	202	194	17	14
KQ76_00185	CP009361.1	44481	45452	-	972	8	1	12	6	3738	3692	2720	2683
KQ76_00190	CP009361.1	45505	45876	-	372	6	6	11	8	249	283	525	486
KQ76_00195	CP009361.1	45896	47287	-	1392	11	11	14	8	527	532	747	746
KQ76_00200	CP009361.1	47401	47604	+	204	2	1	4	3	174	189	319	307
KQ76_00205	CP009361.1	47647	47979	+	333	2	2	6	2	276	223	333	293
KQ76_00210	CP009361.1	48254	48829	+	576	44	12	60	21	1659	1681	1304	1311
KQ76_00215	CP009361.1	49299	49772	+	474	7	8	15	9	551	550	488	472
KQ76_00220	CP009361.1	49879	50865	-	987	894	896	20	8	1165	1144	1342	1251
KQ76_00230	CP009361.1	51424	51720	+	297	1	2	1	2	215	212	248	242
KQ76_00235	CP009361.1	51928	52530	+	603	1323	360	1517	429	1503	1470	1731	1702
KQ76_00240	CP009361.1	52798	55950	+	3153	43	59	74	52	6247	6290	5051	5114
KQ76_00245	CP009361.1	56033	56515	+	483	24	13	19	16	1499	1509	1384	1364
KQ76_00250	CP009361.1	56720	57706	+	987	7	1	9	10	278	294	517	554
KQ76_00255	CP009361.1	57927	58697	+	771	36	14	15	12	813	856	367	389
KQ76_00260	CP009361.1	58791	61028	+	2238	12	4	40	8	3608	3503	3541	3588
KQ76_00265	CP009361.1	61179	62357	+	1179	9	5	10	11	1290	1286	821	736
KQ76_00270	CP009361.1	62359	63747	+	1389	1020	1051	19	13	791	979	701	666
KQ76_00275	CP009361.1	64233	65900	-	1668	17	16	24	22	1148	1147	1354	1352
KQ76_00280	CP009361.1	66219	67994	-	1776	6	6	20	17	848	896	453	456
KQ76_00285	CP009361.1	68345	68818	+	474	4	1	3	4	331	317	399	370
KQ76_00290	CP009361.1	69080	70672	+	1593	14	8	43	25	12188	12181	11074	10721
KQ76_00295	CP009361.1	71001	72503	-	1503	2185	2169	1819	1916	135323	135705	130968	128201
KQ76_00300	CP009361.1	72924	73676	-	753	7	8	12	8	2825	2778	1930	1877
KQ76_00305	CP009361.1	74045	75043	-	999	10	3	15	8	565	581	422	412
KQ76_00310	CP009361.1	75040	76035	-	996	7	3	6	10	154	160	449	423
KQ76_00315	CP009361.1	76051	77043	-	993	16	7	15	14	2102	2102	1588	1496
KQ76_00320	CP009361.1	77274	78254	+	981	3	2	10	3	316	360	146	166
KQ76_00325	CP009361.1	78251	79261	+	1011	7	1	5	3	797	784	142	137
KQ76_00330	CP009361.1	79282	81036	+	1755	5	11	14	19	217	261	208	242
KQ76_00335	CP009361.1	81029	82285	+	1257	5	12	19	6	166	209	182	179
KQ76_00340	CP009361.1	82275	84011	+	1737	15	7	16	9	441	421	194	245
KQ76_00345	CP009361.1	83992	85770	+	1779	11	12	20	13	530	560	298	275
KQ76_00350	CP009361.1	85745	86521	+	777	6	2	25	4	37	54	29	35
KQ76_00355	CP009361.1	86521	87723	+	1203	5	4	9	11	466	567	388	390
KQ76_00360	CP009361.1	87727	88491	+	765	1	0	8	2	154	170	152	159
KQ76_00365	CP009361.1	88429	88620	-	192	6	2	20	11	64	80	80	83
KQ76_00370	CP009361.1	88687	89313	+	627	8	7	11	13	195	160	390	380
KQ76_00375	CP009361.1	89524	90300	+	777	4	1	4	7	1787	1866	1067	1051
KQ76_00385	CP009361.1	90644	91615	+	972	15	10	28	5	87	103	177	137
KQ76_00390	CP009361.1	91578	92267	+	690	1	7	13	9	125	125	80	95
KQ76_00395	CP009361.1	92477	93643	+	1167	5	3	9	3	100	82	182	209
KQ76_00400	CP009361.1	93624	94862	+	1239	19	19	48	21	592	573	481	454
KQ76_00405	CP009361.1	94852	96282	+	1431	14	4	23	19	509	485	636	633
KQ76_00410	CP009361.1	96550	97149	+	600	7	1	11	2	2485	2247	2048	1978
KQ76_00415	CP009361.1	97518	98183	+	666	2	6	11	10	1133	1074	610	585
KQ76_00420	CP009361.1	98285	99025	-	741	12	5	16	5	584	575	170	160
KQ76_00425	CP009361.1	99276	99983	+	708	1	3	10	6	78	116	108	105
KQ76_00430	CP009361.1	99990	101342	+	1353	18	22	58	23	496	537	522	531
KQ76_00435	CP009361.1	101423	102085	+	663	4	0	18	4	2301	2117	1251	1232
KQ76_00440	CP009361.1	102113	103291	+	1179	56	48	28	18	4723	4777	3163	3125
KQ76_00445	CP009361.1	103422	104237	-	816	2	5	9	10	380	294	315	308
KQ76_00450	CP009361.1	104234	105034	-	801	5	4	10	6	474	546	319	311
KQ76_00455	CP009361.1	105036	105809	-	774	4	8	6	11	309	318	275	289
KQ76_00460	CP009361.1	106023	106979	-	957	7	15	15	8	465	394	639	623
KQ76_00465	CP009361.1	107208	108752	+	1545	11	20	28	13	364	402	308	308
KQ76_00470	CP009361.1	108803	110338	+	1536	14	15	22	6	955	977	715	746
KQ76_00475	CP009361.1	110495	111262	+	768	11	19	20	20	402	428	399	407
KQ76_00480	CP009361.1	111268	112443	+	1176	139	24	141	38	938	900	763	765
KQ76_00485	CP009361.1	112829	115438	+	2610	29	10	47	17	609	643	485	492
KQ76_00490	CP009361.1	115783	116451	+	669	1	9	12	8	473	441	440	438
KQ76_00495	CP009361.1	116467	117153	+	687	10	16	872	912	568	480	481	475
KQ76_00500	CP009361.1	117156	117920	+	765	8	2	7	4	655	644	324	337
KQ76_00505	CP009361.1	117940	119763	+	1824	27	28	1926	1899	1010	975	992	975
KQ76_00510	CP009361.1	119753	120781	+	1029	6	16	10	11	384	361	455	401
KQ76_00515	CP009361.1	120794	121903	+	1110	4	3	9	3	430	426	381	347
KQ76_00520	CP009361.1	121907	123031	+	1125	8	15	7	28	263	250	301	287
KQ76_00525	CP009361.1	123034	124113	+	1080	22	31	53	30	382	373	644	664
KQ76_00530	CP009361.1	124106	125500	+	1395	45	7	76	20	851	880	589	626
KQ76_00535	CP009361.1	125497	126054	+	558	144	8	69	6	372	440	292	271
KQ76_00540	CP009361.1	126063	127301	+	1239	18	27	34	30	554	563	816	782
KQ76_00545	CP009361.1	127335	128540	+	1206	4	3	16	7	559	582	336	402
KQ76_00550	CP009361.1	128551	129108	+	558	3	4	16	10	320	352	411	393
KQ76_00555	CP009361.1	129108	129995	+	888	7	2	8	0	223	228	739	722
KQ76_00560	CP009361.1	130049	131311	+	1263	6	4	12	7	924	949	624	612
KQ76_00565	CP009361.1	131388	132533	+	1146	7	4	3	6	1087	988	772	762
KQ76_00570	CP009361.1	132598	132924	-	327	5	6	13	7	99	108	239	206
KQ76_00575	CP009361.1	132931	133314	-	384	4	15	12	6	104	120	195	175
KQ76_00580	CP009361.1	133741	135228	+	1488	13	4	9	5	1827	1701	1175	1189
KQ76_00585	CP009361.1	135875	136834	+	960	16	20	18	12	917	926	665	645
KQ76_00590	CP009361.1	136896	137099	-	204	4	1	2	1	27	21	82	77
KQ76_00595	CP009361.1	137278	137790	+	513	4	0	5	1	1155	1186	2374	2386
KQ76_00600	CP009361.1	138132	138872	+	741	10	3	35	22	364	336	397	382
KQ76_00605	CP009361.1	138886	139860	+	975	3	6	5	5	760	742	577	660
KQ76_00610	CP009361.1	139857	140618	+	762	3	14	12	13	337	330	327	316
KQ76_00615	CP009361.1	140628	141662	+	1035	7	4	6	10	605	635	557	572
KQ76_00620	CP009361.1	141876	142235	+	360	2	0	0	8	2126	2103	1319	1342
KQ76_00625	CP009361.1	142409	143434	+	1026	17	5	13	7	172	186	296	327
KQ76_00630	CP009361.1	143820	145070	+	1251	7	24	19	24	1052	972	774	735
KQ76_00635	CP009361.1	145517	152692	+	7176	54	22	1190	1095	8300	8423	9006	8789
KQ76_00640	CP009361.1	152705	153349	+	645	6	4	2055	2018	688	665	1164	1101
KQ76_00645	CP009361.1	153678	154172	-	495	4	2	6	1	1199	1196	1358	1342
KQ76_00650	CP009361.1	154442	155212	-	771	3	1	6	2	89	75	303	296
KQ76_00660	CP009361.1	156480	157514	-	1035	6	5	16	4	1074	1190	177	242
KQ76_00665	CP009361.1	157550	158734	-	1185	21	10	14	13	103	139	443	426
KQ76_00670	CP009361.1	158987	160342	-	1356	10	12	21	19	6723	6637	7397	7266
KQ76_00675	CP009361.1	160620	161177	-	558	7	9	7	3	2352	2204	1053	1008
KQ76_00680	CP009361.1	161244	162884	-	1641	10	6	36	5	5031	4882	3833	3640
KQ76_00685	CP009361.1	163076	163177	+	102	0	0	0	0	31	23	3	1
KQ76_00690	CP009361.1	163156	165201	-	2046	3	8	14	10	1361	1385	2363	2230
KQ76_00695	CP009361.1	165786	166841	+	1056	7	2	8	4	122	112	323	318
KQ76_00700	CP009361.1	166841	167737	+	897	8	3	4	7	230	218	257	225
KQ76_00705	CP009361.1	167749	169203	+	1455	13	8	13	4	479	472	322	310
KQ76_00710	CP009361.1	169206	170081	+	876	5	0	14	4	177	187	234	204
KQ76_00715	CP009361.1	170276	170557	-	282	4	1	8	8	113	102	119	122
KQ76_00720	CP009361.1	170770	173559	+	2790	19	16	33	23	6103	6227	5912	5721
KQ76_00725	CP009361.1	173759	174622	+	864	41	58	69	70	1924	1922	2084	1969
KQ76_00730	CP009361.1	174827	176419	-	1593	102	5	101	11	608	647	1011	956
KQ76_00735	CP009361.1	176421	177854	+	1434	12	3	21	2	270	320	373	339
KQ76_00740	CP009361.1	177860	179023	+	1164	8	3	15	11	171	160	143	128
KQ76_00745	CP009361.1	179040	180815	+	1776	13	19	14	17	346	415	392	422
KQ76_00750	CP009361.1	180853	182859	+	2007	12	2	19	10	657	617	304	282
KQ76_00755	CP009361.1	183396	184022	-	627	3	4	5	4	349	354	139	130
KQ76_00760	CP009361.1	184231	184809	+	579	4	1	7	8	177	177	86	92
KQ76_00765	CP009361.1	185192	186289	+	1098	1	7	8	12	383	408	140	170
KQ76_00770	CP009361.1	186302	187573	+	1272	12	10	14	10	499	554	210	213
KQ76_00775	CP009361.1	187576	188844	+	1269	16	12	21	25	467	496	401	422
KQ76_00780	CP009361.1	188846	189685	+	840	4	4	19	9	200	182	178	217
KQ76_00785	CP009361.1	189862	190938	+	1077	34	1	26	0	471	497	230	233
KQ76_00790	CP009361.1	190963	192003	+	1041	8	5	63	60	391	387	106	100
KQ76_00795	CP009361.1	192058	193026	+	969	7	3	13	2	475	437	333	395
KQ76_00800	CP009361.1	193385	193879	-	495	36	7	99	4	115	126	306	314
KQ76_00805	CP009361.1	194112	195491	+	1380	4	14	6	19	130	85	179	179
KQ76_00810	CP009361.1	195850	196608	-	759	3	4	7	14	486	482	487	473
KQ76_00815	CP009361.1	196601	198157	-	1557	13	15	24	13	1330	1282	1029	976
KQ76_00820	CP009361.1	198154	199122	-	969	11	6	30	16	498	527	652	653
KQ76_00825	CP009361.1	199710	201959	+	2250	915	946	5961	6348	3916	4077	2698	2710
KQ76_00830	CP009361.1	201982	202737	+	756	1	1	10	3	164	157	166	149
KQ76_00835	CP009361.1	202841	203008	+	168	0	0	5	7	13	13	12	19
KQ76_00840	CP009361.1	203059	204822	+	1764	13	8	33	19	2620	2617	1907	1839
KQ76_00845	CP009361.1	204986	205330	-	345	3	2	2	2	62	54	162	152
KQ76_00850	CP009361.1	205520	207511	+	1992	26	18	31	29	228	257	320	339
KQ76_00855	CP009361.1	207693	207800	-	108	3	2	0	0	5	6	6	13
KQ76_00860	CP009361.1	207819	207959	-	141	8	1	5	4	52	41	89	95
KQ76_00865	CP009361.1	208098	209282	-	1185	2	6	5	7	3742	3535	811	766
KQ76_00870	CP009361.1	209312	211573	-	2262	13	2	14	12	5382	5294	1033	970
KQ76_00875	CP009361.1	211760	212971	-	1212	5	4	9	1	3506	3399	543	473
KQ76_00880	CP009361.1	213083	214588	-	1506	11	10	9	9	2913	2794	1197	1099
KQ76_00885	CP009361.1	214614	216176	-	1563	3	2	3	10	3881	3720	2118	2063
KQ76_00890	CP009361.1	216550	217221	+	672	2	2	3	8	318	340	288	295
KQ76_00895	CP009361.1	217358	218587	+	1230	48	29	726	1071	1910	1897	1106	1106
KQ76_00900	CP009361.1	218898	220373	-	1476	14	10	37	24	1218	1148	944	894
KQ76_00905	CP009361.1	220571	220927	-	357	45	10	110	46	137	151	140	124
KQ76_00910	CP009361.1	221084	221257	-	174	0	2	1	2	581	703	376	400
KQ76_00915	CP009361.1	221282	222427	-	1146	326	329	14	17	2713	2634	3833	3733
KQ76_00920	CP009361.1	222582	222689	+	108	0	7	17	19	37	28	31	26
KQ76_00925	CP009361.1	223000	223953	+	954	102	102	5641	5862	29346	30463	25079	24795
KQ76_00930	CP009361.1	224165	224308	+	144	2	2	0	1	145	181	44	47
KQ76_00935	CP009361.1	224274	225803	-	1530	4	4	9	10	1203	1246	1284	1224
KQ76_00940	CP009361.1	226167	227102	+	936	8	5	673	921	1547	1537	775	748
KQ76_00950	CP009361.1	227440	229536	+	2097	9	10	34	17	603	528	372	383
KQ76_00955	CP009361.1	229521	229988	+	468	1	2	8	1	39	45	51	29
KQ76_00960	CP009361.1	230011	230289	+	279	6	4	3	4	67	53	33	58
KQ76_00965	CP009361.1	230516	231775	+	1260	6	2	12	4	125	123	88	116
KQ76_00970	CP009361.1	231793	232848	+	1056	5	2	9	5	195	192	123	122
KQ76_00975	CP009361.1	232850	232996	+	147	8	3	15	11	30	30	60	52
KQ76_00980	CP009361.1	233020	234063	+	1044	7	9	19	6	145	141	186	203
KQ76_00985	CP009361.1	234591	235307	+	717	3	4	11	8	1882	1864	1869	1710
KQ76_00990	CP009361.1	235300	236325	+	1026	4	11	1	17	1990	1999	1549	1600
KQ76_00995	CP009361.1	236347	238041	+	1695	13	19	22	13	4107	4173	4630	4386
KQ76_01000	CP009361.1	238307	238468	-	162	0	0	59	107	96	92	166	175
KQ76_01005	CP009361.1	239011	240180	+	1170	9	3	22	6	1910	1905	1555	1575
KQ76_01010	CP009361.1	240456	241172	+	717	3	8	6	13	4856	5029	3102	3050
KQ76_01015	CP009361.1	241165	242190	+	1026	6	2	10	6	5661	5690	4123	4038
KQ76_01020	CP009361.1	242212	243900	+	1689	9	6	23	16	14596	13899	12343	12008
KQ76_01025	CP009361.1	243933	245657	+	1725	12	18	19	9	13390	13283	11213	10920
KQ76_01030	CP009361.1	245797	246471	+	675	0	4	7	4	737	780	838	873
KQ76_01035	CP009361.1	246722	248476	+	1755	13	7	1142	1130	2094	2059	1778	1738
KQ76_01040	CP009361.1	248479	249219	+	741	2	8	11	7	1004	987	604	549
KQ76_01045	CP009361.1	249338	249775	+	438	2	10	5	5	328	322	70	78
KQ76_01050	CP009361.1	249768	250469	+	702	5	15	17	15	623	603	238	200
KQ76_01055	CP009361.1	250816	253101	+	2286	17	17	34	27	459	463	361	330
KQ76_01060	CP009361.1	253327	254031	-	705	4	1	8	3	546	603	712	689
KQ76_01065	CP009361.1	254178	254969	+	792	6	6	19	7	239	231	100	125
KQ76_01070	CP009361.1	254985	256421	+	1437	54	5	85	11	589	597	465	489
KQ76_01075	CP009361.1	256470	256679	+	210	0	0	0	0	42	29	98	83
KQ76_01080	CP009361.1	256916	257677	-	762	9	5	19	10	201	214	133	116
KQ76_01085	CP009361.1	257696	257830	+	135	2	2	6	3	26	29	75	81
KQ76_01090	CP009361.1	257928	258842	-	915	4	3	7	5	396	385	497	484
KQ76_01095	CP009361.1	258870	259274	-	405	6	10	11	2	465	438	375	351
KQ76_01100	CP009361.1	259289	260170	-	882	12	1	14	9	678	715	531	515
KQ76_01105	CP009361.1	260402	261400	-	999	33	8	1392	1318	964	970	887	952
KQ76_01110	CP009361.1	261617	261730	+	114	13	3	14	5	92	99	116	138
KQ76_01115	CP009361.1	261780	262172	+	393	2	10	3	6	599	630	632	586
KQ76_01120	CP009361.1	262301	263677	-	1377	4	2	10	9	211	207	267	238
KQ76_01125	CP009361.1	263911	264903	+	993	10	55	10	85	412	462	775	769
KQ76_01130	CP009361.1	265229	266179	+	951	3	7	4	3	1110	1166	1001	986
KQ76_01135	CP009361.1	266231	266890	-	660	3	7	19	8	760	766	1140	1081
KQ76_01140	CP009361.1	266904	267824	-	921	3	3	10	2	902	942	691	687
KQ76_01145	CP009361.1	267821	268987	-	1167	16	6	21	7	750	715	890	896
KQ76_01150	CP009361.1	269055	270578	-	1524	28	43	855	988	8379	8238	7059	6830
KQ76_01155	CP009361.1	270908	271801	-	894	7	2	6	7	1771	2051	2031	1941
KQ76_01160	CP009361.1	272049	272342	+	294	2	0	3	2	16634	17099	14303	14611
KQ76_01165	CP009361.1	272425	275454	+	3030	91	41	103	92	14317	14803	12726	12305
KQ76_01170	CP009361.1	275454	275912	+	459	16	21	20	16	1387	1398	1449	1505
KQ76_01175	CP009361.1	275884	276126	+	243	1	0	1	3	475	394	373	350
KQ76_01180	CP009361.1	276139	277473	+	1335	55	49	64	58	5122	5111	4854	4752
KQ76_01185	CP009361.1	277495	281943	+	4449	59	49	104	72	22852	22802	18698	18717
KQ76_01190	CP009361.1	281946	282212	+	267	2	3	199	135	3619	3472	3080	2987
KQ76_01195	CP009361.1	282235	282630	+	396	14	15	150	182	2832	2824	2746	2903
KQ76_01200	CP009361.1	282652	284322	+	1671	430	172	1751	811	13910	14245	12565	12414
KQ76_01205	CP009361.1	284338	284982	+	645	1756	1991	39	21	2502	2470	3317	3170
KQ76_01210	CP009361.1	284982	285437	+	456	2	7	1	6	3287	3282	3568	3514
KQ76_01215	CP009361.1	285430	285888	+	459	4	4	4	3	3286	3314	1905	1835
KQ76_01220	CP009361.1	285912	286499	+	588	4	3	12	6	2687	2700	2500	2390
KQ76_01225	CP009361.1	286676	286894	+	219	15	12	1241	1224	2797	2964	2074	2071
KQ76_01230	CP009361.1	287026	287526	+	501	9	10	7	7	1225	1342	1082	1143
KQ76_01235	CP009361.1	287537	288037	+	501	9	104	9	113	1074	1091	1406	1409
KQ76_01240	CP009361.1	288048	288539	+	492	7	23	10	31	1247	1226	664	694
KQ76_01245	CP009361.1	288832	289305	+	474	98	56	165	97	1383	1086	1104	768
KQ76_01250	CP009361.1	289320	289694	+	375	14	29	14	27	1074	1312	727	702
KQ76_01255	CP009361.1	289712	290101	+	390	19	10	41	28	1085	1046	692	687
KQ76_01260	CP009361.1	290103	290495	+	393	24	15	7	4	524	518	625	604
KQ76_01265	CP009361.1	291011	291511	+	501	2	4	5	8	620	631	579	621
KQ76_01270	CP009361.1	291522	292022	+	501	0	4	5	2	996	986	805	736
KQ76_01285	CP009361.1	293668	294066	+	399	8	8	16	8	1009	1015	1366	1378
KQ76_01295	CP009361.1	295377	296684	-	1308	7	1	13	11	681	661	912	903
KQ76_01305	CP009361.1	297268	298158	+	891	15	12	13	7	13010	12835	9117	9150
KQ76_01310	CP009361.1	298175	298408	-	234	1	2	3	2	100	88	62	66
KQ76_01315	CP009361.1	298407	299456	+	1050	7	5	37	10	661	687	1228	1254
KQ76_01320	CP009361.1	299469	300146	+	678	10	10	1097	1254	558	565	518	549
KQ76_01325	CP009361.1	300354	301385	+	1032	9	15	13	28	3321	3335	2782	2851
KQ76_01330	CP009361.1	301728	302846	+	1119	10	9	25	13	182	131	99	70
KQ76_01335	CP009361.1	302821	303744	+	924	14	41	5	59	362	360	213	218
KQ76_01340	CP009361.1	303755	304975	+	1221	25	13	17	15	272	267	212	206
KQ76_01345	CP009361.1	305080	306612	-	1533	13	11	17	18	419	447	643	637
KQ76_01350	CP009361.1	306652	307533	-	882	3	7	10	8	428	373	335	327
KQ76_01355	CP009361.1	307691	308551	+	861	44	136	146	247	63	62	117	106
KQ76_01360	CP009361.1	308828	309628	-	801	1	2	7	5	768	758	735	818
KQ76_01365	CP009361.1	309768	310436	+	669	4	3	12	5	130	109	494	486
KQ76_01370	CP009361.1	310562	311875	-	1314	10	7	15	4	120	103	184	186
KQ76_01375	CP009361.1	312292	314367	+	2076	18	14	31	44	6538	6375	5558	5523
KQ76_01380	CP009361.1	314609	315436	-	828	5	1	4	10	1672	1599	1792	1753
KQ76_01385	CP009361.1	315494	316708	-	1215	2	4	14	4	654	635	353	344
KQ76_01390	CP009361.1	316804	316902	+	99	11	13	15	7	165	163	31	42
KQ76_01395	CP009361.1	317016	318017	+	1002	3	0	11	1	369	377	167	176
KQ76_01400	CP009361.1	318051	318383	+	333	1	0	7	2	184	186	201	176
KQ76_01405	CP009361.1	318384	319184	+	801	5	11	2	3	359	343	202	211
KQ76_01410	CP009361.1	319174	320118	+	945	7	3	6	8	667	690	374	368
KQ76_01415	CP009361.1	320096	321118	+	1023	5	5	15	8	646	655	154	182
KQ76_01420	CP009361.1	321434	322459	+	1026	6	7	10	9	1788	1739	1194	1156
KQ76_01425	CP009361.1	322553	323899	-	1347	8	2	10	8	609	590	396	388
KQ76_01430	CP009361.1	323914	324198	-	285	2	2	7	2	210	161	106	99
KQ76_01435	CP009361.1	324200	324643	-	444	1	2	1	2	33	73	30	49
KQ76_01440	CP009361.1	324648	326603	-	1956	4	7	37	8	814	1030	538	506
KQ76_01445	CP009361.1	326815	327234	+	420	3	1	13	2	280	292	332	325
KQ76_01450	CP009361.1	327341	328696	+	1356	16	11	30	23	236	251	150	146
KQ76_01455	CP009361.1	328802	329242	+	441	2	0	18	1	41	63	113	123
KQ76_01460	CP009361.1	329326	330684	-	1359	8	10	15	12	922	919	694	666
KQ76_01465	CP009361.1	330996	331922	+	927	12	2	13	6	447	470	179	192
KQ76_01470	CP009361.1	331936	332997	+	1062	5	7	12	5	279	303	321	272
KQ76_01480	CP009361.1	333637	334632	-	996	4	2	5	2	1574	1530	1901	1987
KQ76_01485	CP009361.1	334631	334912	+	282	0	2	1	1	73	59	44	38
KQ76_01490	CP009361.1	334992	335537	+	546	12	2	9	8	527	522	65	64
KQ76_01495	CP009361.1	335802	336656	+	855	24	29	25	25	545	480	337	351
KQ76_01500	CP009361.1	336653	337882	+	1230	2	9	3	2	331	375	721	723
KQ76_01505	CP009361.1	337863	339575	+	1713	18	19	25	33	604	645	470	450
KQ76_01510	CP009361.1	339921	340622	-	702	2	1	8	7	2375	2439	1863	1726
KQ76_01515	CP009361.1	340639	340854	-	216	2	1	0	2	641	635	1291	1348
KQ76_01520	CP009361.1	340962	341351	-	390	1	2	1	0	1648	1616	1579	1569
KQ76_01525	CP009361.1	341591	341794	+	204	8	3	2	1	610	130	579	97
KQ76_01530	CP009361.1	341791	342504	+	714	3	3	26	3	450	435	423	412
KQ76_01535	CP009361.1	342529	343371	+	843	1	4	3	6	1192	1215	763	770
KQ76_01540	CP009361.1	343371	344000	+	630	11	9	9	7	1339	1332	965	939
KQ76_01545	CP009361.1	344369	345502	-	1134	12	3	16	7	616	600	629	641
KQ76_01550	CP009361.1	345911	346069	-	159	3	0	641	503	1918	1898	875	869
KQ76_01555	CP009361.1	346042	347223	+	1182	8	5	513	602	2284	2283	2803	2828
KQ76_01560	CP009361.1	347306	348058	-	753	2	0	8	2	514	502	757	738
KQ76_01565	CP009361.1	348101	350329	-	2229	11	15	57	21	1479	1399	1338	1243
KQ76_01570	CP009361.1	350326	352167	-	1842	6	7	18	15	1592	1482	1155	1068
KQ76_01575	CP009361.1	352136	353296	-	1161	7	6	9	2	271	242	329	339
KQ76_01580	CP009361.1	353293	354396	-	1104	3	1	28	7	259	278	256	242
KQ76_01585	CP009361.1	355060	355905	+	846	2	7	19	21	1862	1823	758	755
KQ76_01590	CP009361.1	356059	356940	+	882	13	10	277	355	1289	1238	1268	1157
KQ76_01595	CP009361.1	356970	357173	+	204	19	9	775	385	786	819	1121	1036
KQ76_01600	CP009361.1	357185	358282	+	1098	5	4	299	716	4734	4663	3751	3821
KQ76_01605	CP009361.1	358368	358559	-	192	0	4	2	0	375	375	155	130
KQ76_01610	CP009361.1	358803	359099	+	297	3	1	4	5	5363	5246	4440	4324
KQ76_01615	CP009361.1	359120	359623	+	504	3	2	34	4	9945	10130	10667	10341
KQ76_01620	CP009361.1	359675	359917	+	243	0	2	2	5	1697	1771	2114	2082
KQ76_01625	CP009361.1	360149	360868	-	720	74	61	201	81	3506	3897	2131	2140
KQ76_01630	CP009361.1	360983	362197	-	1215	12	17	17	11	4209	4031	3215	3077
KQ76_01635	CP009361.1	362653	363348	-	696	52	27	60	56	3011	3018	4165	4085
KQ76_01640	CP009361.1	363492	363704	+	213	6	0	9	3	58	73	26	23
KQ76_01645	CP009361.1	363705	363977	+	273	5	1	3	3	91	114	29	24
KQ76_01650	CP009361.1	363989	364135	+	147	0	5	0	0	14	12	11	18
KQ76_01655	CP009361.1	364128	364337	+	210	2	3	2	2	46	41	38	25
KQ76_01660	CP009361.1	364340	364663	+	324	4	2	4	4	155	163	161	152
KQ76_01665	CP009361.1	364728	365597	+	870	3	3	2	4	2722	2881	2006	2036
KQ76_01670	CP009361.1	365611	367320	+	1710	18	8	64	26	1092	1052	488	489
KQ76_01675	CP009361.1	367632	368012	+	381	8	5	6	5	137	125	175	177
KQ76_01680	CP009361.1	368009	368650	+	642	20	13	5	0	233	205	106	138
KQ76_01685	CP009361.1	369167	369508	+	342	1	1	0	1	209	230	99	90
KQ76_01690	CP009361.1	369520	370116	+	597	2	0	7	3	239	266	353	350
KQ76_01695	CP009361.1	370117	370335	+	219	0	1	1	2	92	85	98	103
KQ76_01700	CP009361.1	370386	370913	+	528	3	6	8	3	271	292	177	177
KQ76_01705	CP009361.1	370916	371257	+	342	2	1	5	1	79	79	100	97
KQ76_01710	CP009361.1	371254	371823	+	570	9	2	3	2	300	314	229	254
KQ76_01715	CP009361.1	372100	373068	+	969	10	5	15	10	3866	3871	3214	3189
KQ76_01720	CP009361.1	373463	373645	+	183	2	1	3	2	228	256	209	209
KQ76_01725	CP009361.1	373763	374275	+	513	1289	1359	242	236	25078	25885	19880	19679
KQ76_01730	CP009361.1	374291	374470	+	180	5	4	5	5	3467	3436	2377	2376
KQ76_01735	CP009361.1	375045	376052	-	1008	15	13	37	18	658	629	775	742
KQ76_01740	CP009361.1	376482	376604	-	123	14	5	25	4	131	134	38	35
KQ76_01745	CP009361.1	377010	377378	+	369	7	1	11	4	57	74	102	93
KQ76_01750	CP009361.1	377559	378131	+	573	121	626	5134	5357	6551	6542	5762	5813
KQ76_01755	CP009361.1	378269	378532	-	264	4	0	480	662	1152	1214	857	824
KQ76_01760	CP009361.1	378826	379080	+	255	10	10	1538	1556	9181	9569	7141	7280
KQ76_01765	CP009361.1	379119	379328	-	210	5	3	6	3	188	195	122	138
KQ76_01770	CP009361.1	379506	380087	+	582	5	10	9	19	1055	1108	696	627
KQ76_01775	CP009361.1	380153	380539	-	387	5	3	18	4	52	43	521	512
KQ76_01785	CP009361.1	380807	381433	-	627	7	13	838	838	1678	1763	1718	1657
KQ76_01790	CP009361.1	381506	383125	-	1620	35	13	50	16	3103	3115	2386	2370
KQ76_01795	CP009361.1	383240	384763	-	1524	651	669	1854	1821	30933	31158	27161	26805
KQ76_01800	CP009361.1	384779	385348	-	570	2	2	7	3	19227	18945	16561	16209
KQ76_01805	CP009361.1	385839	386594	+	756	7	5	15	3	2804	2849	2612	2546
KQ76_01810	CP009361.1	386674	388062	-	1389	9	4	11	3	2262	2319	3091	3050
KQ76_01815	CP009361.1	388147	388248	+	102	0	1	1	2	7	9	6	7
KQ76_01820	CP009361.1	389181	390137	-	957	4	5	12	13	5836	5851	5513	5263
KQ76_01825	CP009361.1	390255	390917	-	663	4	7	16	12	1909	1895	1553	1509
KQ76_01830	CP009361.1	391060	391467	-	408	3	1	923	1087	3096	3085	2270	2205
KQ76_01835	CP009361.1	391980	392558	+	579	7	2	7	2	10706	10569	9551	9627
KQ76_01840	CP009361.1	392558	393826	+	1269	14	12	121	118	29362	30594	28762	28860
KQ76_01845	CP009361.1	393864	395330	+	1467	2050	2047	384	891	62456	62134	52379	52090
KQ76_01850	CP009361.1	395355	396896	+	1542	124	34	407	407	50974	51113	52857	51866
KQ76_01855	CP009361.1	397427	397963	-	537	9	9	15	8	170	119	165	165
KQ76_01860	CP009361.1	398355	398579	-	225	0	1	6	4	36	38	41	38
KQ76_01865	CP009361.1	398650	399060	-	411	28	24	76	29	120	141	154	160
KQ76_01870	CP009361.1	400205	400531	-	327	5	5	9	10	244	278	177	153
KQ76_01875	CP009361.1	400789	400941	-	153	9	5	17	18	209	219	155	160
KQ76_01880	CP009361.1	401463	401822	-	360	2	3	8	3	156	158	371	316
KQ76_01885	CP009361.1	401841	402686	-	846	4	2	2	3	1199	1183	1260	1269
KQ76_01890	CP009361.1	403158	403838	+	681	4	11	20	8	386	427	288	293
KQ76_01895	CP009361.1	404121	404822	+	702	8	6	15	5	420	415	147	123
KQ76_01900	CP009361.1	405110	406141	+	1032	9	6	12	14	686	318	563	150
KQ76_01905	CP009361.1	406488	407465	+	978	26	13	30	11	339	346	164	192
KQ76_01915	CP009361.1	407826	408530	+	705	10	1	47	17	138	133	202	207
KQ76_01920	CP009361.1	408977	409672	+	696	12	14	10	11	121	86	121	134
KQ76_01925	CP009361.1	410013	410711	+	699	7	16	6	14	225	187	97	105
KQ76_01930	CP009361.1	411074	411757	+	684	24	8	29	5	188	195	171	181
KQ76_01935	CP009361.1	411840	411959	-	120	0	0	0	1	27	27	17	26
KQ76_01940	CP009361.1	412019	413575	+	1557	9	7	8	10	4342	4427	3668	3795
KQ76_01945	CP009361.1	413568	414800	+	1233	51	64	72	80	2921	3031	4332	4213
KQ76_01950	CP009361.1	415183	415881	+	699	4	11	7	13	358	369	526	534
KQ76_01955	CP009361.1	415900	417387	+	1488	32	27	25	21	720	701	418	391
KQ76_01960	CP009361.1	417493	417801	-	309	1	2	4	4	262	321	217	213
KQ76_01965	CP009361.1	418168	418950	+	783	15	10	28	24	483	531	299	327
KQ76_01970	CP009361.1	418998	419771	+	774	11	7	23	13	454	472	377	358
KQ76_01980	CP009361.1	420642	421412	+	771	11	8	15	14	226	307	465	453
KQ76_01985	CP009361.1	421444	422244	+	801	17	12	31	14	941	1051	612	609
KQ76_01990	CP009361.1	422263	423057	+	795	23	14	25	22	1125	1121	880	817
KQ76_01995	CP009361.1	423226	424044	+	819	32	48	63	53	3945	3927	3149	3071
KQ76_02005	CP009361.1	424111	425364	+	1254	38	44	58	43	3621	3645	3093	3077
KQ76_02010	CP009361.1	425361	425684	+	324	6	1	4	4	587	509	693	656
KQ76_02015	CP009361.1	425703	426017	+	315	2	0	9	2	1093	1204	725	657
KQ76_02020	CP009361.1	426306	426500	-	195	2	3	6	0	35	36	51	42
KQ76_02025	CP009361.1	426685	427887	+	1203	4	4	11	6	123	148	265	255
KQ76_02030	CP009361.1	428156	428284	+	129	2	0	0	0	14	22	15	14
KQ76_02035	CP009361.1	429473	430957	+	1485	11	4	6	10	439	434	379	385
KQ76_02040	CP009361.1	430970	433675	+	2706	60	37	132	46	2630	2702	2307	2327
KQ76_02045	CP009361.1	433837	434199	+	363	2	0	2	0	1733	1780	1404	1427
KQ76_02050	CP009361.1	434428	434844	-	417	6	4	4	1	593	622	551	538
KQ76_02055	CP009361.1	434882	435556	+	675	6	9	3	7	679	652	668	674
KQ76_02060	CP009361.1	435593	436327	+	735	10	2	11	5	525	554	682	699
KQ76_02065	CP009361.1	436505	436618	+	114	1	0	1	3	7	7	16	8
KQ76_02070	CP009361.1	436784	438121	+	1338	6	12	18	10	219	242	521	533
KQ76_02075	CP009361.1	438338	439243	+	906	5	1	21	6	753	730	554	650
KQ76_02080	CP009361.1	439236	440378	+	1143	4	5	16	5	541	530	819	797
KQ76_02085	CP009361.1	440669	441694	+	1026	9	5	12	6	516	536	696	665
KQ76_02090	CP009361.1	441698	442357	+	660	2	4	4	8	525	557	181	161
KQ76_02095	CP009361.1	442394	443236	+	843	7	2	19	10	868	870	605	589
KQ76_02100	CP009361.1	443570	444574	+	1005	7	9	7	3	17857	18010	14603	14393
KQ76_02105	CP009361.1	444761	445030	-	270	0	2	3	4	745	730	527	480
KQ76_02110	CP009361.1	445180	445575	+	396	4	9	882	773	873	820	638	597
KQ76_02115	CP009361.1	445565	446050	+	486	2	4	6	4	757	860	686	703
KQ76_02120	CP009361.1	446219	447001	-	783	10	22	11	21	1640	1612	2047	2038
KQ76_02125	CP009361.1	446998	448110	-	1113	10	12	16	10	2280	2290	1806	1753
KQ76_02130	CP009361.1	448231	449115	-	885	6	1	13	8	713	701	130	108
KQ76_02140	CP009361.1	453813	455276	+	1464	8	7	9	16	281	270	520	509
KQ76_02145	CP009361.1	455549	455641	+	93	3	0	1	4	1783	2061	1286	1425
KQ76_02150	CP009361.1	456094	457521	+	1428	24	15	40	18	5531	5547	4443	4483
KQ76_02155	CP009361.1	457585	459225	+	1641	135	161	12	6	2861	2926	2507	2471
KQ76_02160	CP009361.1	459250	459978	+	729	0	4	5	4	1151	1172	1118	1305
KQ76_02165	CP009361.1	460379	460480	+	102	1	3	0	6	17	10	9	8
KQ76_02170	CP009361.1	460619	461143	+	525	2	4	25	8	404	446	166	172
KQ76_02175	CP009361.1	461212	462909	+	1698	33	9	133	21	6001	5867	4770	4527
KQ76_02180	CP009361.1	462999	463316	+	318	6	2	4	6	5762	5862	4392	4275
KQ76_02185	CP009361.1	463323	463919	+	597	4	4	3	2	4574	4611	4105	3994
KQ76_02195	CP009361.1	464907	466463	+	1557	82277	88695	275008	296920	19178	19671	60226	60835
KQ76_02200	CP009361.1	466884	469809	+	2926	139843	152713	430744	464333	53441	54985	103339	107133
KQ76_02205	CP009361.1	469880	469994	+	115	919	1113	2628	3136	2277	2705	1247	1321
KQ76_02210	CP009361.1	470416	471753	+	1338	7	14	19	10	971	981	468	441
KQ76_02215	CP009361.1	471755	472372	+	618	2	1	3	2	827	859	505	522
KQ76_02220	CP009361.1	472400	472729	+	330	1	0	3	2	4576	4761	3462	3516
KQ76_02225	CP009361.1	472848	473024	-	177	8	2	6	0	313	346	622	619
KQ76_02230	CP009361.1	472943	473869	+	927	14	5	30	8	1801	1740	2020	2004
KQ76_02235	CP009361.1	473870	474673	+	804	1390	1403	868	930	3156	3199	2737	2678
KQ76_02240	CP009361.1	474690	475037	+	348	3	2	7	9	575	573	1145	1074
KQ76_02245	CP009361.1	475311	476036	+	726	8	15	16	18	416	388	127	140
KQ76_02250	CP009361.1	476029	476277	+	249	1	2	3	2	30	53	136	133
KQ76_02255	CP009361.1	476279	477118	+	840	11	14	34	12	1150	1143	380	360
KQ76_02260	CP009361.1	477143	477298	-	156	1	1	5	2	159	171	190	190
KQ76_02265	CP009361.1	477403	479376	+	1974	24	3	30	10	19396	19449	17594	17315
KQ76_02270	CP009361.1	479407	480180	+	774	4	5	16	11	5190	5224	4394	4174
KQ76_02275	CP009361.1	480347	480883	+	537	320	297	41	29	1688	1802	1501	1489
KQ76_02280	CP009361.1	480894	481787	+	894	295	292	13	19	2382	2442	3109	2952
KQ76_02285	CP009361.1	481887	482150	+	264	1	3	4	5	2901	2904	2444	2388
KQ76_02290	CP009361.1	482461	483309	+	849	6	11	12	7	2794	2893	2771	2732
KQ76_02295	CP009361.1	483323	484147	+	825	1509	1609	181	140	7295	7358	5162	5259
KQ76_02300	CP009361.1	484164	484544	+	381	672	668	748	904	7385	7328	5125	4838
KQ76_02305	CP009361.1	484616	484918	+	303	1320	1326	1453	1459	3423	3506	4278	4212
KQ76_02310	CP009361.1	485107	485238	+	132	4	1	5	1	33	29	55	32
KQ76_02315	CP009361.1	485261	486613	+	1353	7	7	12	11	10459	10253	8472	8404
KQ76_02320	CP009361.1	486760	487725	+	966	5	6	28	15	12511	12494	9836	9711
KQ76_02325	CP009361.1	487783	487893	-	111	1	0	0	1	1028	1016	575	572
KQ76_02330	CP009361.1	487875	488528	+	654	13	11	4	8	10623	10991	8409	8310
KQ76_02335	CP009361.1	488839	489411	+	573	7	0	7	6	1130	1160	1367	1341
KQ76_02340	CP009361.1	489411	492917	+	3507	34	30	462	399	8710	8713	7686	7448
KQ76_02345	CP009361.1	492907	494433	+	1527	92	41	1216	884	4080	4042	2191	2164
KQ76_02350	CP009361.1	494433	495626	+	1194	7	7	64	60	3682	4069	3649	3683
KQ76_02355	CP009361.1	495623	495886	+	264	3	1	3	1	944	946	1171	1101
KQ76_02360	CP009361.1	495904	496296	+	393	6	5	19	14	1561	1480	1220	1176
KQ76_02365	CP009361.1	496401	496802	+	402	1	3	4	5	3977	3918	3656	3583
KQ76_02370	CP009361.1	496982	498277	+	1296	28	18	61	23	2461	2304	1580	1595
KQ76_02375	CP009361.1	498282	498821	+	540	5	3	13	5	2273	2261	1600	1548
KQ76_02380	CP009361.1	499079	501172	+	2094	23	16	31	23	26753	26858	21098	20900
KQ76_02385	CP009361.1	501586	502467	+	882	4	2	6	7	2124	2022	1999	2038
KQ76_02390	CP009361.1	502646	503578	+	933	19	6	36	9	11717	11938	9943	10009
KQ76_02395	CP009361.1	503794	504597	+	804	1173	1205	9	21	2531	2660	1889	1839
KQ76_02400	CP009361.1	504575	504940	+	366	0	1	3	0	1523	1491	1186	1198
KQ76_02405	CP009361.1	504937	505413	+	477	1	4	8	3	2083	2109	1994	1943
KQ76_02410	CP009361.1	505807	505899	+	93	0	0	1	2	1780	1939	1023	1170
KQ76_02415	CP009361.1	505952	507439	+	1488	10	5	12	10	18465	18726	15839	15353
KQ76_02420	CP009361.1	507997	508111	+	115	938	1089	2551	3122	2306	2612	1218	1309
KQ76_02425	CP009361.1	508124	508199	+	76	91	167	2	5	1726	2224	1097	1213
KQ76_02430	CP009361.1	508216	508291	+	76	0	0	0	1	497	517	213	248
KQ76_02435	CP009361.1	508298	508370	+	73	1	4	751	783	687	803	508	485
KQ76_02440	CP009361.1	508404	508478	+	75	6	1	2	4	1646	1991	1228	1287
KQ76_02445	CP009361.1	508486	508574	+	89	0	0	0	0	230	271	100	123
KQ76_02450	CP009361.1	508580	508656	+	77	0	0	2	2	328	523	233	320
KQ76_02455	CP009361.1	508677	508750	+	74	0	0	2	2	215	259	157	192
KQ76_02460	CP009361.1	508774	508849	+	76	198	288	554	965	14980	20169	6849	8494
KQ76_02465	CP009361.1	508970	510526	+	1557	82085	89388	275116	297757	19083	19737	60338	61099
KQ76_02470	CP009361.1	510616	510692	+	77	3	5	277	381	5657	6689	2530	2991
KQ76_02475	CP009361.1	510982	513907	+	2926	140307	152513	429597	463678	53704	54341	103438	106892
KQ76_02480	CP009361.1	513978	514092	+	115	909	1054	2659	3255	2418	2587	1371	1512
KQ76_02485	CP009361.1	514303	515859	+	1557	80935	88830	273637	295617	19179	19862	60168	61084
KQ76_02490	CP009361.1	516278	519203	+	2926	139807	152837	424357	461070	53688	54340	103905	106896
KQ76_02495	CP009361.1	519274	519388	+	115	949	1077	2636	3143	2306	2672	1270	1399
KQ76_02505	CP009361.1	520227	521609	-	1383	65	35	74	41	850	913	538	539
KQ76_02510	CP009361.1	521713	522600	+	888	2	3	193	136	8230	8619	6745	6665
KQ76_02515	CP009361.1	522604	523164	+	561	2	0	120	169	3958	4211	3270	3313
KQ76_02520	CP009361.1	523173	523400	+	228	5	9	6	4	53	53	66	63
KQ76_02525	CP009361.1	523371	524585	-	1215	13	2	13	7	12660	12504	11206	11029
KQ76_02530	CP009361.1	524743	525204	+	462	1	5	12	2	1151	1122	1307	1291
KQ76_02535	CP009361.1	525223	525789	+	567	102	37	658	677	1030	1051	1146	1157
KQ76_02540	CP009361.1	525779	526786	+	1008	18	7	1775	1628	2979	2897	3029	2936
KQ76_02545	CP009361.1	526800	529256	+	2457	22	26	56	53	9057	9027	8388	8516
KQ76_02555	CP009361.1	529740	531104	+	1365	10	10	13	10	4437	4427	3738	4052
KQ76_02560	CP009361.1	531129	532202	+	1074	11	15	11	25	3157	3236	2726	2720
KQ76_02565	CP009361.1	532759	534213	+	1455	14	6	17	15	9950	10155	8842	8735
KQ76_02570	CP009361.1	534643	535284	+	642	5	11	716	790	1854	1854	1207	1199
KQ76_02575	CP009361.1	535268	536668	+	1401	40	2	41	10	5015	4981	4764	4866
KQ76_02580	CP009361.1	536661	537065	+	405	863	915	432	764	2536	2430	1830	1750
KQ76_02585	CP009361.1	537073	537819	+	747	1016	955	1423	1420	1767	1823	2624	2448
KQ76_02590	CP009361.1	537819	538343	+	525	1	1	4	3	2977	2866	2312	2310
KQ76_02595	CP009361.1	538424	538993	+	570	3	34	3	44	1103	1074	1834	1812
KQ76_02600	CP009361.1	539307	539489	+	183	5	2	8	4	2616	2464	1580	1514
KQ76_02605	CP009361.1	539502	540050	+	549	2	7	10	6	4995	5313	4485	4537
KQ76_02610	CP009361.1	540231	540653	+	423	2	3	8	9	12487	12824	9416	9521
KQ76_02615	CP009361.1	540861	541553	+	693	5	1	7	1	10417	10435	8591	8416
KQ76_02620	CP009361.1	541825	542325	+	501	1	2	6	6	15196	15450	15927	15707
KQ76_02625	CP009361.1	542368	542736	+	369	1	0	932	943	5246	5342	4145	4132
KQ76_02630	CP009361.1	542911	543519	+	609	90	21	390	54	1202	1193	1112	1239
KQ76_02635	CP009361.1	543734	547285	+	3552	16	12	47	32	49578	49292	46228	45553
KQ76_02640	CP009361.1	547422	551045	+	3624	53	28	4239	4069	63243	62855	52007	51280
KQ76_02645	CP009361.1	551182	551436	+	255	1	4	3	1	14387	14148	10258	10039
KQ76_02650	CP009361.1	551534	551947	+	414	1	7	4	9	9205	8746	6950	6674
KQ76_02655	CP009361.1	552013	552483	+	471	2	3	3	3	10712	10530	9929	9764
KQ76_02660	CP009361.1	552606	554687	+	2082	538	1192	3888	6472	68835	67764	60993	60605
KQ76_02665	CP009361.1	554904	556088	+	1185	484	359	248	157	71841	72400	65087	63526
KQ76_02670	CP009361.1	556369	557544	-	1176	23	13	33	18	1008	1009	1474	1451
KQ76_02675	CP009361.1	557715	558902	+	1188	6	10	209	221	11896	11742	9501	9368
KQ76_02680	CP009361.1	559178	560056	+	879	28	16	24	25	3763	3820	3948	3949
KQ76_02685	CP009361.1	560214	561851	+	1638	14	10	30	18	482	479	776	781
KQ76_02690	CP009361.1	562065	563030	+	966	3	3	5	2	4685	4701	4563	4521
KQ76_02695	CP009361.1	563365	564441	+	1077	7	8	22	9	11820	11808	10827	10691
KQ76_02700	CP009361.1	564692	565375	+	684	925	903	7	2	2866	2891	2281	2323
KQ76_02705	CP009361.1	565491	566153	-	663	480	608	6	3	871	873	1327	1434
KQ76_02710	CP009361.1	566146	566763	-	618	7	1	11	7	948	920	791	823
KQ76_02715	CP009361.1	566830	567300	+	471	1	1	9	6	768	839	1003	972
KQ76_02720	CP009361.1	567447	568316	+	870	6	3	10	9	3327	3353	2220	2085
KQ76_02725	CP009361.1	568336	568902	+	567	9	9	37	13	3146	3117	1916	1992
KQ76_02730	CP009361.1	569333	572209	+	2877	79	78	290	328	11490	11536	10728	10250
KQ76_02735	CP009361.1	572573	576589	+	4017	87	62	428	475	157771	156463	139674	136580
KQ76_02740	CP009361.1	576986	580489	+	3504	93	73	328	393	25943	25933	23335	22728
KQ76_02745	CP009361.1	580608	582080	+	1473	18	18	23	20	2391	2346	1921	1822
KQ76_02750	CP009361.1	582205	583695	-	1491	8	21	36	14	1728	1738	1964	1927
KQ76_02755	CP009361.1	583977	584855	-	879	5	0	13	6	4342	4392	2949	2867
KQ76_02760	CP009361.1	584868	585533	-	666	3	1	8	8	3487	3443	2415	2315
KQ76_02765	CP009361.1	585547	585906	-	360	2	1	2	3	1413	1313	1540	1504
KQ76_02770	CP009361.1	586186	586944	+	759	6	1	582	565	2187	2253	1865	1802
KQ76_02775	CP009361.1	587021	587653	+	633	8	8	10	4	11420	11499	9105	9052
KQ76_02780	CP009361.1	587655	588203	+	549	1033	1061	7	2	6010	6176	6392	6232
KQ76_02785	CP009361.1	588316	588963	+	648	4	3	980	788	1236	1243	981	980
KQ76_02790	CP009361.1	589466	590866	+	1401	16	7	710	923	1940	1943	2075	2101
KQ76_02795	CP009361.1	591411	592787	+	1377	13	14	15	20	617	592	399	372
KQ76_02800	CP009361.1	592789	593928	+	1140	9	2	18	6	613	613	429	432
KQ76_02805	CP009361.1	593903	594268	+	366	1	3	8	4	134	132	194	189
KQ76_02810	CP009361.1	594271	594540	+	270	0	4	9	3	104	87	83	84
KQ76_02815	CP009361.1	594741	594908	-	168	1	0	35	32	3247	3280	285	241
KQ76_02820	CP009361.1	595442	596272	-	831	2	2	13	2	3728	3923	3243	3226
KQ76_02825	CP009361.1	596456	597112	+	657	1	2	5	1	2302	2208	1503	1512
KQ76_02830	CP009361.1	597113	597493	+	381	222	170	3	2	507	548	649	653
KQ76_02835	CP009361.1	597626	597994	+	369	4	1	7	1	412	413	425	426
KQ76_02840	CP009361.1	598115	599599	+	1485	870	1061	656	436	5581	5711	4814	4828
KQ76_02845	CP009361.1	599741	600193	-	453	1	3	4	6	872	829	999	998
KQ76_02850	CP009361.1	600206	600970	-	765	3	4	3	6	1124	1112	748	731
KQ76_02855	CP009361.1	601518	602270	-	753	4	3	7	10	9266	9202	7259	7157
KQ76_02860	CP009361.1	602438	603424	+	987	1	9	561	904	12765	12870	13858	13274
KQ76_02865	CP009361.1	603427	604263	+	837	2	1	918	596	9940	10034	7844	7808
KQ76_02870	CP009361.1	604850	605770	+	921	5	1	8	3	1174	1056	1046	1061
KQ76_02875	CP009361.1	605775	606758	+	984	407	514	10	5	1960	2079	1184	1213
KQ76_02880	CP009361.1	606771	607847	+	1077	5	7	12	9	1122	1159	1067	1081
KQ76_02885	CP009361.1	608024	608365	+	342	2	2	4	4	156	139	350	365
KQ76_02890	CP009361.1	608417	609739	-	1323	8	5	13	2	1647	1642	1057	1012
KQ76_02895	CP009361.1	609726	610166	-	441	12	6	22	19	411	356	409	434
KQ76_02900	CP009361.1	610224	610325	+	102	2	0	2	1	31	56	31	34
KQ76_02905	CP009361.1	610790	612184	+	1395	9	8	52	11	3446	3654	2610	2710
KQ76_02910	CP009361.1	612188	612823	+	636	24	38	60	43	1798	1751	1630	1687
KQ76_02915	CP009361.1	612789	613058	+	270	0	2	3	0	704	653	460	428
KQ76_02925	CP009361.1	613820	614449	+	630	66	35	133	49	929	951	1465	1390
KQ76_02930	CP009361.1	614902	615840	+	939	139	118	343	165	5356	5658	3691	3619
KQ76_02935	CP009361.1	616050	616586	+	537	6	3	4	2	1856	1764	1157	1038
KQ76_02940	CP009361.1	616755	617231	+	477	306	327	5	6	1508	1614	1594	1605
KQ76_02945	CP009361.1	617271	618566	+	1296	4	4	8	7	7387	7399	6348	6178
KQ76_02950	CP009361.1	618609	619115	+	507	2	2	10	1	1888	1988	1413	1288
KQ76_02955	CP009361.1	619614	620624	+	1011	37	2	131	12	1455	1488	1659	1679
KQ76_02965	CP009361.1	620900	621316	+	417	2	10	6	4	1610	1601	1281	1262
KQ76_02970	CP009361.1	621313	622974	+	1662	22	12	17	13	5802	5832	6420	6326
KQ76_02980	CP009361.1	623309	623944	+	636	11	16	22	14	139	167	138	138
KQ76_02985	CP009361.1	624263	625150	+	888	8	14	9	22	3203	3213	2966	2915
KQ76_02990	CP009361.1	625264	626250	+	987	7	8	14	8	1007	993	1478	1472
KQ76_02995	CP009361.1	626305	627024	+	720	13	3	15	6	971	945	1252	1208
KQ76_03000	CP009361.1	627008	627808	+	801	5	3	8	9	2765	2717	1817	1829
KQ76_03005	CP009361.1	627944	628450	+	507	8	11	32	12	6612	6636	5888	5898
KQ76_03010	CP009361.1	628612	629328	+	717	12	10	26	13	756	775	709	694
KQ76_03015	CP009361.1	629497	630285	+	789	7	8	1078	1033	4640	4614	3413	3363
KQ76_03020	CP009361.1	630535	630909	-	375	222	223	7	15	2198	2169	2338	2249
KQ76_03025	CP009361.1	631857	632786	-	930	5	10	9	15	934	944	570	534
KQ76_03030	CP009361.1	632979	633203	-	225	2	2	1	0	29	26	35	36
KQ76_03035	CP009361.1	633220	633423	-	204	1	0	6	4	36	22	20	37
KQ76_03040	CP009361.1	633578	634138	+	561	4	3	12	4	214	249	379	413
KQ76_03045	CP009361.1	634157	636559	+	2403	26	25	49	31	1893	1929	1785	1617
KQ76_03050	CP009361.1	636546	636971	+	426	3	1	7	0	493	447	352	345
KQ76_03055	CP009361.1	636968	637312	+	345	2	1	0	1	166	117	270	238
KQ76_03060	CP009361.1	637302	638798	+	1497	14	6	19	12	833	736	863	763
KQ76_03065	CP009361.1	638799	639281	+	483	10	2	15	11	565	563	661	654
KQ76_03070	CP009361.1	639278	639580	+	303	1	5	3	5	137	123	254	245
KQ76_03075	CP009361.1	639555	639992	+	438	5	1	11	5	272	297	323	309
KQ76_03080	CP009361.1	640332	642374	+	2043	22	16	47	21	3684	3636	3102	3068
KQ76_03085	CP009361.1	642460	643608	-	1149	14	12	20	14	447	433	386	412
KQ76_03090	CP009361.1	643612	644193	-	582	7	3	17	9	160	138	162	161
KQ76_03095	CP009361.1	645259	646188	-	930	20	10	28	14	15863	15928	17217	16845
KQ76_03100	CP009361.1	646185	647021	-	837	2	1	8	5	11368	11276	10114	9960
KQ76_03105	CP009361.1	647015	647758	-	744	5	3	793	793	11179	10947	9045	9065
KQ76_03110	CP009361.1	647880	648524	+	645	4	5	246	294	1294	1291	708	719
KQ76_03115	CP009361.1	648604	649356	-	753	16	42	331	329	550	561	360	395
KQ76_03120	CP009361.1	649592	650356	+	765	85	85	141	73	1227	1289	922	990
KQ76_03125	CP009361.1	650416	651210	-	795	8	5	958	844	1436	1492	1754	1709
KQ76_03130	CP009361.1	651557	652369	+	813	8	7	10	11	2383	2389	2735	2502
KQ76_03135	CP009361.1	652468	653571	+	1104	0	3	17	6	1513	1525	1022	1066
KQ76_03140	CP009361.1	653568	654629	+	1062	10	9	11	14	1053	1014	1445	1384
KQ76_03145	CP009361.1	654692	655090	+	399	5	4	9	8	1224	1213	515	441
KQ76_03150	CP009361.1	655207	656502	-	1296	35	14	64	26	1278	1328	1456	1417
KQ76_03155	CP009361.1	656923	658650	+	1728	29	19	22	21	8576	8845	7073	6959
KQ76_03160	CP009361.1	659009	660238	+	1230	4	1	19	13	9626	9610	9215	9104
KQ76_03165	CP009361.1	660493	660585	+	93	0	1	1	2	95	81	31	29
KQ76_03170	CP009361.1	660763	661596	+	834	12	4	15	7	969	961	795	861
KQ76_03175	CP009361.1	661878	662675	+	798	14	3	10	2	1196	1182	1196	1176
KQ76_03180	CP009361.1	662711	663715	+	1005	13	4	7	3	640	651	853	969
KQ76_03185	CP009361.1	663712	664728	+	1017	15	11	22	13	1459	1434	724	757
KQ76_03190	CP009361.1	664962	665930	+	969	17	11	25	10	1419	1415	943	871
KQ76_03195	CP009361.1	665972	666556	+	585	2	1	32	4	901	949	1165	1096
KQ76_03200	CP009361.1	666549	666911	+	363	1	0	0	0	945	875	477	482
KQ76_03205	CP009361.1	667027	667524	+	498	2	1	1111	1051	2758	2702	3468	3398
KQ76_03210	CP009361.1	667980	669047	+	1068	6	7	13	12	1702	1838	1191	1287
KQ76_03215	CP009361.1	669198	670241	+	1044	8	14	9	14	784	777	874	862
KQ76_03220	CP009361.1	670406	670594	-	189	5	8	12	6	263	295	330	319
KQ76_03225	CP009361.1	670570	670998	+	429	12	7	14	6	660	700	312	261
KQ76_03230	CP009361.1	671196	671702	-	507	1	1	6	8	1371	1316	724	698
KQ76_03235	CP009361.1	671815	672738	+	924	33	5	12	6	761	765	1040	1072
KQ76_03240	CP009361.1	672754	673428	+	675	3	0	4	4	1430	1409	1152	1099
KQ76_03245	CP009361.1	673421	674461	+	1041	25	20	41	52	2337	2610	1875	1731
KQ76_03250	CP009361.1	674608	675369	+	762	12	10	22	10	1764	1748	1377	1345
KQ76_03255	CP009361.1	675359	677248	+	1890	18	27	35	21	3678	3698	3661	3640
KQ76_03260	CP009361.1	677866	678483	+	618	11	0	17	4	2850	2857	2015	1996
KQ76_03265	CP009361.1	678499	679506	+	1008	7	9	20	12	3603	3511	2799	2699
KQ76_03270	CP009361.1	680093	680890	-	798	0	1	8	3	12743	12761	12444	12109
KQ76_03275	CP009361.1	681251	681895	+	645	8	7	21	10	1034	427	1065	504
KQ76_03280	CP009361.1	682577	684727	+	2151	26	20	63	21	1960	1833	1662	1717
KQ76_03285	CP009361.1	684873	685232	+	360	9	1	2	3	876	869	420	430
KQ76_03290	CP009361.1	685422	686138	+	717	3	2	8	6	3342	3356	3149	3266
KQ76_03295	CP009361.1	686138	686611	+	474	4	5	3	4	1138	1144	1279	1170
KQ76_03300	CP009361.1	686703	686819	+	117	5	0	5	2	35	44	64	71
KQ76_03305	CP009361.1	686964	687608	+	645	482	361	199	74	2151	2160	1595	1666
KQ76_03310	CP009361.1	687726	688592	+	867	564	504	13	11	2455	2371	2792	2604
KQ76_03320	CP009361.1	688882	690102	+	1221	8	6	23	21	1585	1565	894	827
KQ76_03325	CP009361.1	690099	690566	+	468	3	3	3	7	111	117	236	236
KQ76_03330	CP009361.1	690809	692455	+	1647	5	4	140	159	463	472	430	416
KQ76_03335	CP009361.1	692610	693299	-	690	14	19	35	31	840	848	447	399
KQ76_03340	CP009361.1	693426	693869	+	444	9	1	18	4	74	70	175	167
KQ76_03345	CP009361.1	693936	694325	+	390	38	50	74	39	689	716	530	535
KQ76_03350	CP009361.1	694463	694762	+	300	2	0	1	1	1002	975	938	960
KQ76_03355	CP009361.1	694842	695384	+	543	2	1	12	4	474	537	202	173
KQ76_03360	CP009361.1	695479	696045	-	567	2	2	1	1	1322	1302	1172	1339
KQ76_03365	CP009361.1	696047	696505	-	459	1	1	9	3	1408	1421	1509	1432
KQ76_03370	CP009361.1	696508	697191	-	684	1822	1801	409	802	5790	5778	5790	5748
KQ76_03375	CP009361.1	697363	698238	-	876	6	2	9	6	2231	2226	1525	1408
KQ76_03380	CP009361.1	698457	700088	+	1632	15	18	43	17	2337	2326	1269	1295
KQ76_03385	CP009361.1	700085	701758	+	1674	17	5	25	7	1327	1443	1400	1350
KQ76_03390	CP009361.1	701885	702328	-	444	434	498	1962	2275	14212	14941	11441	11383
KQ76_03395	CP009361.1	702555	703481	+	927	18	19	25	21	764	724	783	774
KQ76_03400	CP009361.1	703584	704492	+	909	4	3	20	11	884	896	1091	1069
KQ76_03405	CP009361.1	704527	704814	+	288	5	1	2	1	107	118	196	198
KQ76_03410	CP009361.1	705097	706650	+	1554	46	42	72	57	1603	1550	1162	1231
KQ76_03415	CP009361.1	706736	708109	+	1374	12	4	22	12	1220	1263	2295	2315
KQ76_03420	CP009361.1	708264	708548	-	285	3	2	4	3	657	650	346	340
KQ76_03425	CP009361.1	708545	709162	-	618	6	10	10	23	1274	1260	1471	1423
KQ76_03430	CP009361.1	709349	709771	-	423	4	1	3	0	637	637	704	706
KQ76_03435	CP009361.1	709981	711147	+	1167	17	9	91	32	1503	1412	1337	1303
KQ76_03440	CP009361.1	711444	711896	+	453	4	1	2	6	604	635	747	763
KQ76_03445	CP009361.1	712070	712552	+	483	1	2	6	5	431	442	85	117
KQ76_03450	CP009361.1	712802	713566	+	765	6	3	12	5	532	539	338	330
KQ76_03455	CP009361.1	713563	714483	+	921	15	16	8	4	504	520	423	433
KQ76_03460	CP009361.1	714489	716447	+	1959	408	501	19	12	555	592	696	736
KQ76_03470	CP009361.1	716750	717931	+	1182	9	4	4	7	2473	2384	2499	2461
KQ76_03475	CP009361.1	718152	719501	+	1350	9	10	16	12	4881	4824	4297	4243
KQ76_03480	CP009361.1	719715	720554	+	840	338	591	9	5	3891	3822	2939	2921
KQ76_03485	CP009361.1	720686	721669	+	984	18	14	44	13	4221	4287	3092	3036
KQ76_03490	CP009361.1	721741	722796	-	1056	13	10	756	748	7442	7558	7927	7789
KQ76_03495	CP009361.1	722796	723482	-	687	11	2	9	5	4185	4177	2654	2629
KQ76_03500	CP009361.1	723457	723930	-	474	2	2	5	5	1086	1157	646	555
KQ76_03505	CP009361.1	724271	724711	-	441	13	26	26	23	735	798	1311	1350
KQ76_03510	CP009361.1	724991	725575	-	585	48	28	54	58	934	967	1235	1226
KQ76_03515	CP009361.1	725674	726387	-	714	4	1	5	1	452	483	243	235
KQ76_03520	CP009361.1	726391	726810	-	420	0	2	6	4	487	514	64	53
KQ76_03525	CP009361.1	726812	727480	-	669	9	2	9	4	390	405	170	187
KQ76_03530	CP009361.1	727831	728424	+	594	3	1	4	1	343	347	139	152
KQ76_03535	CP009361.1	728408	729559	+	1152	9	9	16	6	1000	949	815	742
KQ76_03540	CP009361.1	729559	730167	+	609	5	4	7	4	540	461	715	777
KQ76_03545	CP009361.1	730233	730439	+	207	1	1	2	4	411	402	384	327
KQ76_03550	CP009361.1	730527	731237	+	711	5	4	5	5	2155	2107	1514	1473
KQ76_03555	CP009361.1	731221	732225	+	1005	20	5	19	11	1948	2033	2329	2344
KQ76_03560	CP009361.1	732699	734639	+	1941	305	345	50	41	8432	8149	6538	6309
KQ76_03565	CP009361.1	734782	734940	-	159	3	0	6	1	34	23	37	32
KQ76_03570	CP009361.1	734917	736794	+	1878	14	10	67	22	4926	4877	4458	4399
KQ76_03575	CP009361.1	736809	738587	+	1779	30	62	1071	1073	3632	3664	3604	3588
KQ76_03580	CP009361.1	738808	739785	+	978	20	15	74	26	2002	2060	2013	2060
KQ76_03585	CP009361.1	739778	741292	+	1515	23	21	1105	1132	3692	3758	3046	3002
KQ76_03590	CP009361.1	741532	742590	+	1059	10	7	8	10	3116	3184	3796	3664
KQ76_03595	CP009361.1	742749	743291	+	543	3	5	7	4	1321	1386	1445	1448
KQ76_03605	CP009361.1	743843	744760	-	918	2294	2457	10	14	1763	1767	1596	1573
KQ76_03610	CP009361.1	744851	744952	+	102	3	7	10	9	30	26	23	30
KQ76_03615	CP009361.1	745030	746535	-	1506	16	20	1699	1690	27176	27296	23950	23620
KQ76_03620	CP009361.1	746875	747375	-	501	1	1	6	0	762	871	772	758
KQ76_03625	CP009361.1	747395	748261	-	867	26	17	30	21	1429	1448	853	884
KQ76_03630	CP009361.1	749063	749461	+	399	2	1	2	2	9085	9468	8519	8188
KQ76_03635	CP009361.1	749424	751529	+	2106	1236	1274	2562	2548	59528	59119	54027	52449
KQ76_03640	CP009361.1	751649	752620	+	972	10	17	20	11	16260	16030	13767	13582
KQ76_03650	CP009361.1	752997	753968	+	972	4	2	28	8	343	377	390	401
KQ76_03655	CP009361.1	753955	754911	+	957	7	8	8	9	568	538	419	395
KQ76_03660	CP009361.1	754908	755669	+	762	4	5	8	7	341	356	580	542
KQ76_03665	CP009361.1	755784	756812	+	1029	22	8	36	19	1464	1528	1182	1130
KQ76_03670	CP009361.1	757129	757443	-	315	2	1	1	1	1074	952	949	917
KQ76_03675	CP009361.1	757461	758384	-	924	5	2	23	8	2044	2004	2640	2643
KQ76_03680	CP009361.1	758511	759029	-	519	5	6	10	3	800	869	753	721
KQ76_03685	CP009361.1	759149	760027	+	879	13	30	32	32	1670	1654	1240	1252
KQ76_03690	CP009361.1	760181	760501	+	321	335	391	9	4	895	875	636	635
KQ76_03695	CP009361.1	760926	762050	+	1125	7	5	9	4	2030	2027	966	929
KQ76_03700	CP009361.1	762238	763464	-	1227	10	6	9	10	3744	3677	2862	2800
KQ76_03705	CP009361.1	763478	763972	-	495	3	16	6	18	574	553	614	563
KQ76_03710	CP009361.1	763990	764751	-	762	5	1	2	6	567	569	330	333
KQ76_03715	CP009361.1	764947	766017	-	1071	8	13	15	8	2020	2032	1283	1290
KQ76_03720	CP009361.1	766335	767390	+	1056	14	8	22	19	1256	1353	1489	1461
KQ76_03725	CP009361.1	767554	768195	-	642	9	15	23	23	505	495	636	633
KQ76_03730	CP009361.1	768339	769205	+	867	7	4	2	5	4526	4534	2833	2726
KQ76_03735	CP009361.1	769569	770651	+	1083	5	11	18	20	214	182	104	110
KQ76_03740	CP009361.1	770644	771318	+	675	8	1	11	3	62	70	214	232
KQ76_03745	CP009361.1	771379	771951	+	573	2	4	15	10	5424	5656	5275	5151
KQ76_03750	CP009361.1	772365	774896	+	2532	30	14	36	29	8842	8861	9152	9066
KQ76_03755	CP009361.1	774938	775036	+	99	0	0	1	2	25	19	62	73
KQ76_03760	CP009361.1	775329	776321	+	993	2	7	11	6	3507	3341	3262	3230
KQ76_03765	CP009361.1	776468	776620	+	153	6	0	147	95	287	244	268	261
KQ76_03775	CP009361.1	777090	777929	+	840	7	3	4	7	1656	1727	1505	1452
KQ76_03780	CP009361.1	778103	778753	+	651	23	5	36	17	952	909	1225	1215
KQ76_03785	CP009361.1	778750	778986	+	237	3	0	1	2	337	346	278	280
KQ76_03790	CP009361.1	779255	781240	+	1986	12	19	39	23	3998	3943	2536	2494
KQ76_03795	CP009361.1	781248	784094	+	2847	25	32	79	49	4695	5068	4659	4467
KQ76_03810	CP009361.1	784705	785637	+	933	35	5	728	781	4166	4179	3261	3299
KQ76_03815	CP009361.1	785643	786485	+	843	8	2	14	5	4447	4383	2735	2707
KQ76_03820	CP009361.1	786493	786978	+	486	5	6	6	6	1608	1530	1360	1309
KQ76_03825	CP009361.1	786986	788425	+	1440	14	21	40	32	3932	3924	3085	2999
KQ76_03830	CP009361.1	788492	789427	+	936	7	3	1629	1616	14248	14783	10147	9902
KQ76_03835	CP009361.1	790195	791106	+	912	105	22	189	35	2845	2922	2952	2939
KQ76_03840	CP009361.1	791103	792098	+	996	13	12	26	10	5212	5102	3587	3581
KQ76_03845	CP009361.1	792207	793151	+	945	11	13	1269	1267	3382	3517	3062	3027
KQ76_03850	CP009361.1	793461	793532	-	72	0	0	1	0	4	4	11	14
KQ76_03855	CP009361.1	793720	794307	+	588	8	4	115	83	5369	5363	4994	5001
KQ76_03860	CP009361.1	794489	796123	+	1635	14	11	23	23	2241	2277	2225	2164
KQ76_03865	CP009361.1	796330	797232	-	903	1193	1236	685	819	541	585	1320	1261
KQ76_03870	CP009361.1	797935	798564	+	630	711	855	332	501	1906	1946	1271	1356
KQ76_03875	CP009361.1	799058	800071	+	1014	567	793	1809	1788	23821	23611	22728	22336
KQ76_03880	CP009361.1	800124	801134	+	1011	13	12	5081	5465	25264	25136	25189	24613
KQ76_03885	CP009361.1	801273	802463	+	1191	9	13	2307	2578	18614	18622	19270	18920
KQ76_03890	CP009361.1	802585	803346	+	762	715	798	904	1006	20091	19940	16880	16299
KQ76_03895	CP009361.1	803349	804866	+	1518	1695	1979	2579	3025	26225	26051	26292	26662
KQ76_03900	CP009361.1	804996	806300	+	1305	10	11	1939	1927	63703	63703	55944	55410
KQ76_03905	CP009361.1	806638	807096	+	459	5	6	2	9	1048	1027	1522	1578
KQ76_03910	CP009361.1	807163	807396	+	234	1	2	2	3	2475	2496	1431	1400
KQ76_03915	CP009361.1	807525	808265	+	741	17	6	37	7	2028	2024	1823	1939
KQ76_03920	CP009361.1	808299	810671	+	2373	32	11	1886	1814	8532	8598	6158	5975
KQ76_03925	CP009361.1	810693	811157	+	465	4	3	1	3	1659	1811	1520	1421
KQ76_03930	CP009361.1	812123	812737	+	615	30	3	13	15	568	577	387	405
KQ76_03935	CP009361.1	813025	813753	-	729	69	58	103	56	2075	2100	2291	2321
KQ76_03940	CP009361.1	814192	814344	+	153	3	6	3	4	21	25	34	38
KQ76_03945	CP009361.1	814352	814873	+	522	512	407	31	6	236	229	219	247
KQ76_03950	CP009361.1	815012	815542	+	531	411	490	8	2	464	441	262	244
KQ76_03955	CP009361.1	815806	818859	+	3054	144	101	1165	1043	8599	8892	7928	8122
KQ76_03960	CP009361.1	819080	820588	+	1509	351	374	733	448	533	763	629	817
KQ76_03965	CP009361.1	820939	821964	+	1026	17	7	15	17	291	307	252	302
KQ76_03970	CP009361.1	822295	822852	+	558	6	6	14	9	201	196	240	227
KQ76_03975	CP009361.1	823193	823879	+	687	5	7	3	3	2400	2739	1597	1558
KQ76_03980	CP009361.1	824236	824436	+	201	3	5	1	4	8590	8955	6655	6667
KQ76_03985	CP009361.1	824933	825151	-	219	0	1	1	3	110	108	180	184
KQ76_03990	CP009361.1	825213	825497	-	285	5	1	4	2	353	413	224	182
KQ76_03995	CP009361.1	825585	826154	-	570	5	6	2	3	667	597	238	259
KQ76_04000	CP009361.1	826342	826530	-	189	4	6	2	1	808	774	419	369
KQ76_04005	CP009361.1	826559	826819	-	261	8	6	6	3	425	379	865	850
KQ76_04010	CP009361.1	827161	827364	+	204	21	14	91	107	1696	1870	1257	1239
KQ76_04015	CP009361.1	827361	827597	-	237	13	21	217	730	2394	2305	1363	1413
KQ76_04020	CP009361.1	827822	828403	+	582	0	0	2	1	171	174	114	113
KQ76_04025	CP009361.1	828476	829093	-	618	7	2	6	5	948	886	863	918
KQ76_04030	CP009361.1	829249	829743	-	495	7	0	9	6	1156	1157	821	832
KQ76_04035	CP009361.1	830142	830564	-	423	11	3	7	6	1472	1447	412	418
KQ76_04040	CP009361.1	830712	831428	+	717	4	1	5	2	498	529	481	458
KQ76_04045	CP009361.1	831511	832050	+	540	6	3	3	2	1049	1074	756	744
KQ76_04050	CP009361.1	832200	832520	-	321	1	0	3	4	866	880	1183	1372
KQ76_04055	CP009361.1	832664	833020	+	357	1	5	5	6	4043	4103	3000	2996
KQ76_04060	CP009361.1	833178	833558	+	381	3	10	1480	2208	27324	28199	24882	24722
KQ76_04070	CP009361.1	833736	834614	+	879	10	3	18	6	4121	4096	3283	3228
KQ76_04075	CP009361.1	835205	835591	+	387	2	3	4	4	942	970	938	985
KQ76_04080	CP009361.1	835584	835880	+	297	4	4	6	6	420	401	682	649
KQ76_04085	CP009361.1	836130	837155	+	1026	9	5	19	16	7627	7633	7152	7005
KQ76_04090	CP009361.1	837148	837843	+	696	14	11	24	26	5532	5506	4896	4750
KQ76_04095	CP009361.1	837861	838682	+	822	462	597	917	917	9045	8966	6746	6599
KQ76_04110	CP009361.1	839498	839692	+	195	342	358	3022	3540	8258	8457	5699	5739
KQ76_04115	CP009361.1	839926	840777	-	852	20	2	18	7	965	964	674	650
KQ76_04120	CP009361.1	841105	841866	+	762	3	4	3036	3420	8981	8967	6871	6783
KQ76_04125	CP009361.1	841964	843271	+	1308	12	2	493	313	7775	7888	6330	6343
KQ76_04130	CP009361.1	843386	844627	+	1242	7	5	277	460	7808	7944	7116	6889
KQ76_04135	CP009361.1	844617	845081	+	465	3	2	2	0	3977	3950	1957	1869
KQ76_04140	CP009361.1	845232	846629	+	1398	10	21	11	19	14859	14654	10736	10333
KQ76_04150	CP009361.1	846961	847275	-	315	2	4	8	9	91	146	230	269
KQ76_04155	CP009361.1	847644	848684	+	1041	104	48	106	40	1276	1260	839	872
KQ76_04160	CP009361.1	848698	849765	+	1068	9	5	5	5	838	884	1570	1695
KQ76_04165	CP009361.1	850065	850913	+	849	1	4	11	8	984	978	1104	1086
KQ76_04170	CP009361.1	850926	851753	+	828	9	4	15	15	786	802	804	800
KQ76_04175	CP009361.1	851780	853099	+	1320	12	2	17	5	2263	2254	1674	1692
KQ76_04180	CP009361.1	853183	854100	+	918	4	3	6	6	9602	9433	9231	9249
KQ76_04185	CP009361.1	854229	854612	+	384	4	4	6	2	788	895	715	781
KQ76_04190	CP009361.1	854691	854957	-	267	2	1	3	5	116	108	209	213
KQ76_04195	CP009361.1	855055	855489	+	435	2	0	5	4	2883	2980	1862	1850
KQ76_04200	CP009361.1	855489	856268	+	780	3	3	5	7	2277	2319	1993	1988
KQ76_04205	CP009361.1	856301	857260	+	960	33	10	15	17	4625	4553	4921	4772
KQ76_04210	CP009361.1	857513	857623	+	111	0	5	4	7	4336	4050	2677	2601
KQ76_04215	CP009361.1	857671	857823	+	153	0	0	6	2	4953	5159	4473	4372
KQ76_04220	CP009361.1	857839	859296	+	1458	17	11	31	15	19044	19104	17591	17154
KQ76_04225	CP009361.1	859293	860507	+	1215	10	7	25	11	26712	26471	24723	24262
KQ76_04230	CP009361.1	860525	860761	+	237	2	5	3	2	3698	3710	3437	3330
KQ76_04235	CP009361.1	860758	861933	+	1176	19	16	48	49	16823	16580	14804	14605
KQ76_04240	CP009361.1	862196	862438	-	243	0	0	5	1	1158	1093	920	905
KQ76_04245	CP009361.1	862539	862862	+	324	9	10	6	7	344	330	475	443
KQ76_04250	CP009361.1	862922	863986	-	1065	5	1	9	9	3896	4016	3271	3207
KQ76_04255	CP009361.1	864303	864539	+	237	2	0	3	0	367	309	203	238
KQ76_04260	CP009361.1	864552	864911	+	360	2	3	2	3	1226	1274	879	847
KQ76_04265	CP009361.1	865365	866573	+	1209	8	7	834	869	16530	16441	16205	15935
KQ76_04270	CP009361.1	866704	868179	+	1476	18	5	1207	1194	4207	4226	3873	3766
KQ76_04275	CP009361.1	868590	869906	+	1317	3	3	21	5	769	773	580	698
KQ76_04280	CP009361.1	869925	870299	+	375	4	3	5	2	221	216	486	515
KQ76_04285	CP009361.1	870355	871509	-	1155	5	6	15	10	141	158	243	263
KQ76_04290	CP009361.1	871772	872128	-	357	2	2	12	7	352	430	369	625
KQ76_04295	CP009361.1	872106	872399	-	294	11	1	4	0	185	191	760	650
KQ76_04300	CP009361.1	872399	872878	-	480	3	2	6	7	1246	1172	850	825
KQ76_04305	CP009361.1	872880	874376	-	1497	7	11	28	16	3913	3890	3875	3830
KQ76_04310	CP009361.1	874369	874710	-	342	1	1	4	4	797	856	1308	1279
KQ76_04315	CP009361.1	874710	875138	-	429	2	3	2	8	1412	1299	900	930
KQ76_04320	CP009361.1	875131	877536	-	2406	14	32	63	25	6437	6413	7543	7258
KQ76_04325	CP009361.1	877667	878050	-	384	3	5	19	15	424	442	282	262
KQ76_04330	CP009361.1	878114	878707	+	594	7	2	3	4	10919	11113	9229	9052
KQ76_04335	CP009361.1	879122	879499	+	378	10	3	3	0	1502	1549	1487	1395
KQ76_04340	CP009361.1	879861	880988	+	1128	3	5	13	11	6063	6520	4296	4217
KQ76_04345	CP009361.1	881296	882486	+	1191	1	4	13	6	5063	4770	3209	2960
KQ76_04350	CP009361.1	882595	883839	+	1245	8	5	21	10	8912	9031	6598	6352
KQ76_04360	CP009361.1	884234	885163	-	930	18	22	36	34	1059	1043	683	695
KQ76_04365	CP009361.1	885405	886784	-	1380	6	10	35	9	729	759	332	276
KQ76_04370	CP009361.1	886774	887979	-	1206	6	10	4	7	549	576	311	284
KQ76_04375	CP009361.1	888330	889661	+	1332	12	9	14	9	20580	20432	18307	18485
KQ76_04380	CP009361.1	889987	890562	+	576	4	19	8	12	1150	1132	776	749
KQ76_04385	CP009361.1	890567	891091	+	525	3	4	0	4	1125	1281	1270	1200
KQ76_04390	CP009361.1	891107	891682	+	576	8	7	10	5	1416	1489	1683	1737
KQ76_04395	CP009361.1	891842	895318	+	3477	86	22	122	59	5638	5473	5211	5048
KQ76_04400	CP009361.1	895319	898972	+	3654	27	16	38	39	8330	8252	7197	7097
KQ76_04405	CP009361.1	899138	900040	+	903	7	6	2180	2282	20019	20635	17633	17424
KQ76_04410	CP009361.1	900366	900755	+	390	0	2	3	13	510	537	585	579
KQ76_04415	CP009361.1	901131	902777	+	1647	7	6	133	174	454	474	395	343
KQ76_04420	CP009361.1	902849	904165	-	1317	30	7	68	35	11055	11168	10178	10230
KQ76_04425	CP009361.1	904217	905041	-	825	8	6	936	560	2822	2940	2898	2792
KQ76_04430	CP009361.1	905155	905463	+	309	6	5	4	1	1447	1448	1070	1035
KQ76_04435	CP009361.1	906043	907857	+	1815	22	15	40	23	496	526	291	322
KQ76_04440	CP009361.1	908060	910669	+	2610	45	39	92	44	3194	3128	2745	2703
KQ76_04445	CP009361.1	910728	911597	-	870	21	15	50	21	468	491	323	291
KQ76_04450	CP009361.1	911707	912852	+	1146	523	417	274	215	402	567	567	837
KQ76_04455	CP009361.1	912836	913477	+	642	8	28	18	38	222	263	220	210
KQ76_04460	CP009361.1	913470	914588	+	1119	27	30	37	40	555	586	967	1013
KQ76_04465	CP009361.1	914572	915087	+	516	3	0	7	4	638	698	553	536
KQ76_04470	CP009361.1	915398	915832	+	435	5	3	14	5	3447	3537	3583	3594
KQ76_04475	CP009361.1	916089	916274	-	186	2	0	1	0	377	376	276	275
KQ76_04480	CP009361.1	916569	917510	+	942	1	2	7	2	2387	2366	1994	2055
KQ76_04485	CP009361.1	917522	918766	+	1245	19	12	18	19	3711	3593	3007	3118
KQ76_04490	CP009361.1	918821	919192	-	372	12	10	20	16	475	477	259	233
KQ76_04495	CP009361.1	919435	920361	+	927	34	8	34	26	4921	5166	3825	3764
KQ76_04500	CP009361.1	920361	921431	+	1071	9	0	6	6	5889	5545	4879	4784
KQ76_04505	CP009361.1	921447	922529	+	1083	7	7	295	845	6710	6855	6714	6741
KQ76_04510	CP009361.1	922519	923460	+	942	8	7	10	14	6509	6416	6148	6010
KQ76_04515	CP009361.1	923479	925134	+	1656	100	21	207	57	10765	11223	10753	10807
KQ76_04520	CP009361.1	925346	925612	+	267	4	3	9	3	50	35	69	34
KQ76_04525	CP009361.1	925604	926551	-	948	5	4	12	6	424	465	345	372
KQ76_04535	CP009361.1	928186	929172	+	987	10	26	21	47	441	436	240	266
KQ76_04540	CP009361.1	929175	930155	+	981	50	51	67	65	364	376	298	249
KQ76_04545	CP009361.1	930148	930798	+	651	25	18	46	35	289	345	243	262
KQ76_04550	CP009361.1	930810	931691	+	882	7	9	18	9	261	244	268	271
KQ76_04555	CP009361.1	931780	932568	-	789	9	16	23	20	253	259	244	236
KQ76_04560	CP009361.1	932604	933320	-	717	5	13	9	9	242	209	138	152
KQ76_04565	CP009361.1	933643	935289	+	1647	2	4	138	154	560	553	431	413
KQ76_04570	CP009361.1	935316	936305	-	990	4	3	11	7	3516	3568	2907	2913
KQ76_04575	CP009361.1	936600	936995	+	396	923	942	12	6	26642	26611	24053	23656
KQ76_04580	CP009361.1	937366	938085	+	720	4	16	11	10	4426	4407	5041	4936
KQ76_04585	CP009361.1	938206	939192	+	987	8	21	24	10	227	196	262	251
KQ76_04590	CP009361.1	939240	941048	+	1809	7	5	918	904	18177	17893	17342	16736
KQ76_04595	CP009361.1	941508	942314	-	807	9	10	22	6	2333	2418	1941	1907
KQ76_04600	CP009361.1	942337	942702	-	366	514	549	4	2	1439	1356	1058	1068
KQ76_04605	CP009361.1	942806	943399	-	594	9	1	9	4	977	905	843	836
KQ76_04610	CP009361.1	943585	943932	+	348	1	6	9	4	1995	2019	1873	1845
KQ76_04615	CP009361.1	943949	944584	+	636	2	4	1551	1537	4190	4310	4052	3875
KQ76_04620	CP009361.1	944601	945410	+	810	128	40	57	12	3625	3777	3214	3143
KQ76_04625	CP009361.1	945407	946261	+	855	12	11	5	9	1292	1269	1651	1551
KQ76_04630	CP009361.1	946282	947667	+	1386	5	13	9	10	1759	1807	2422	2397
KQ76_04635	CP009361.1	947677	949521	+	1845	34	20	34	25	3575	3435	3457	3371
KQ76_04640	CP009361.1	949799	950569	+	771	5	1	9	6	7206	7232	5983	5857
KQ76_04645	CP009361.1	950765	951850	-	1086	19	29	18	20	6898	7087	6215	6298
KQ76_04650	CP009361.1	952192	953760	+	1569	12	5	26	6	1284	1409	589	540
KQ76_04655	CP009361.1	953903	954661	+	759	7	6	1302	1391	1802	1788	1514	1430
KQ76_04660	CP009361.1	954827	955552	+	726	13	6	14	13	904	918	852	842
KQ76_04670	CP009361.1	957147	957656	+	510	9	5	13	13	3924	3953	4821	4772
KQ76_04675	CP009361.1	957769	958959	-	1191	5	13	32	16	1775	1727	2548	2407
KQ76_04680	CP009361.1	958937	960112	-	1176	6	3	28	7	2388	2201	3477	3417
KQ76_04685	CP009361.1	960544	962028	+	1485	18	8	1006	975	2554	2602	2615	2601
KQ76_04690	CP009361.1	962018	962269	+	252	9	7	9	8	333	302	802	724
KQ76_04695	CP009361.1	962269	963831	+	1563	6	1	17	18	5763	5816	4950	5014
KQ76_04700	CP009361.1	964133	964936	+	804	9	2	13	10	732	768	1017	1043
KQ76_04705	CP009361.1	965170	967479	+	2310	25	32	67	70	3244	3239	2090	2081
KQ76_04710	CP009361.1	967496	968854	+	1359	15	6	62	23	2727	2787	2889	2792
KQ76_04715	CP009361.1	968993	970504	+	1512	11	18	15	18	1615	1632	1465	1406
KQ76_04720	CP009361.1	970686	970774	-	89	1	3	1	1	1922	2629	726	1006
KQ76_04725	CP009361.1	970777	970851	-	75	0	0	3	1	243	268	174	211
KQ76_04730	CP009361.1	970993	971562	-	570	3	0	5	5	100	96	172	194
KQ76_04735	CP009361.1	971772	971990	+	219	1115	1108	4	2	1034	1078	893	884
KQ76_04740	CP009361.1	972071	973057	-	987	5	10	10	8	4816	4689	3782	3729
KQ76_04745	CP009361.1	973256	973432	+	177	8	0	19	2	1169	1052	1124	1088
KQ76_04750	CP009361.1	973447	974049	+	603	3	1	15	3	4461	4696	2947	2915
KQ76_04755	CP009361.1	974320	974427	+	108	2	6	4	3	374	364	67	41
KQ76_04760	CP009361.1	974966	975067	+	102	23	5	4	2	36	18	29	17
KQ76_04770	CP009361.1	975393	977357	+	1965	121	88	166	109	936	944	828	865
KQ76_04775	CP009361.1	977360	977680	+	321	2	5	4	2	132	124	108	93
KQ76_04780	CP009361.1	977677	978318	+	642	39	14	50	24	299	271	316	292
KQ76_04785	CP009361.1	978406	978651	-	246	20	11	50	40	107	124	147	152
KQ76_04790	CP009361.1	979037	979324	+	288	2	4	4	7	754	770	256	302
KQ76_04795	CP009361.1	979330	980811	+	1482	22	31	24	55	2825	2813	2496	2403
KQ76_04800	CP009361.1	980901	981257	-	357	3	12	12	20	394	429	308	303
KQ76_04805	CP009361.1	981748	982488	+	741	11	13	17	12	233	269	133	163
KQ76_04810	CP009361.1	982524	982808	+	285	0	0	1	6	417	434	387	359
KQ76_04815	CP009361.1	982959	983279	+	321	4	1	4	1	1104	1139	1025	1074
KQ76_04820	CP009361.1	983293	983595	+	303	1	4	4	3	166	161	769	735
KQ76_04825	CP009361.1	983770	984861	+	1092	7	7	20	8	717	685	513	552
KQ76_04830	CP009361.1	984922	985989	+	1068	65	43	60	83	546	554	510	553
KQ76_04835	CP009361.1	985994	986254	+	261	5	13	13	9	423	411	417	390
KQ76_04840	CP009361.1	986266	986649	+	384	15	38	34	35	371	431	304	270
KQ76_04845	CP009361.1	986684	989179	+	2496	26	30	45	41	1759	1735	1465	1419
KQ76_04850	CP009361.1	989233	990591	+	1359	26	32	38	27	1098	1104	589	561
KQ76_04855	CP009361.1	990596	992443	+	1848	59	44	85	55	1303	1303	762	810
KQ76_04860	CP009361.1	992433	993479	+	1047	9	5	475	481	418	393	426	457
KQ76_04865	CP009361.1	993486	994076	+	591	6	3	25	8	590	571	251	245
KQ76_04870	CP009361.1	994132	994473	+	342	10	16	37	21	634	673	821	825
KQ76_04875	CP009361.1	994582	995085	+	504	61	49	109	43	959	980	1655	1624
KQ76_04880	CP009361.1	995249	995602	+	354	3	4	10	6	1141	1156	1285	1289
KQ76_04885	CP009361.1	995864	996061	+	198	13	19	17	23	91	71	59	89
KQ76_04890	CP009361.1	996108	996224	-	117	16	24	20	27	236	207	88	79
KQ76_04895	CP009361.1	996303	996518	-	216	2	0	7	2	425	420	210	236
KQ76_04900	CP009361.1	996683	997234	+	552	10	3	21	6	785	779	416	399
KQ76_04905	CP009361.1	997286	998224	-	939	11	8	14	9	1697	1743	1768	1803
KQ76_04910	CP009361.1	998406	999767	+	1362	14	10	18	16	1707	1716	1730	1666
KQ76_04915	CP009361.1	999754	1001427	+	1674	13	6	22	9	2941	3003	3015	3041
KQ76_04920	CP009361.1	1001414	1002217	+	804	5	1	1286	1367	2473	2509	1711	1634
KQ76_04925	CP009361.1	1002210	1003031	+	822	3	1	5	5	12212	12696	9305	9281
KQ76_04930	CP009361.1	1003267	1003596	-	330	4	20	15	23	1260	1250	1115	924
KQ76_04935	CP009361.1	1003634	1004815	-	1182	10	24	23	15	3433	3372	3309	3189
KQ76_04940	CP009361.1	1004897	1005970	-	1074	9	6	1276	1306	5661	5471	4360	4398
KQ76_04945	CP009361.1	1006274	1006462	+	189	4	3	12	6	40	33	154	124
KQ76_04950	CP009361.1	1006498	1007652	-	1155	8	8	17	9	3205	3077	2260	2204
KQ76_04955	CP009361.1	1007847	1008857	-	1011	18	30	29	32	526	507	507	524
KQ76_04960	CP009361.1	1009010	1009429	+	420	1	1	6	3	213	220	62	64
KQ76_04965	CP009361.1	1009456	1009566	+	111	1	1	1	0	17	18	16	18
KQ76_04970	CP009361.1	1009637	1013413	-	3777	35	21	1900	2084	39690	39542	36892	36076
KQ76_04975	CP009361.1	1013641	1014075	-	435	8	1	10	1	620	598	422	467
KQ76_04980	CP009361.1	1014231	1014701	-	471	2	8	10	2	2087	2053	1641	1544
KQ76_04985	CP009361.1	1014749	1015975	-	1227	1283	1261	53	17	4114	4201	4699	4648
KQ76_04990	CP009361.1	1016416	1017609	+	1194	7	7	20	14	1061	1062	1783	1658
KQ76_04995	CP009361.1	1017952	1018242	-	291	4	2	1405	1868	9914	10116	8904	8673
KQ76_05000	CP009361.1	1018239	1018844	-	606	7	5	882	983	23349	23141	21474	21184
KQ76_05005	CP009361.1	1018834	1020822	-	1989	19	18	3192	3868	67353	67835	59338	57883
KQ76_05010	CP009361.1	1020822	1021922	-	1101	10	10	389	185	40277	40883	33591	32671
KQ76_05015	CP009361.1	1022227	1022346	+	120	2	1	2	1	28	27	41	25
KQ76_05020	CP009361.1	1022494	1022811	-	318	3	2	3	2	4122	4241	3394	3398
KQ76_05025	CP009361.1	1022996	1023346	-	351	5	0	10	7	304	283	257	231
KQ76_05030	CP009361.1	1023651	1024511	-	861	7	2	4	3	9975	9750	8339	8092
KQ76_05035	CP009361.1	1024712	1025194	+	483	1	0	6	4	245	238	440	511
KQ76_05040	CP009361.1	1025181	1026305	+	1125	6	2	12	7	1087	1104	1074	1037
KQ76_05045	CP009361.1	1026309	1027013	+	705	23	2	21	4	1958	1895	1051	1034
KQ76_05050	CP009361.1	1027013	1027276	+	264	0	3	7	1	243	262	340	308
KQ76_05055	CP009361.1	1027278	1027949	+	672	2	1	16	4	1359	1358	870	922
KQ76_05060	CP009361.1	1027942	1030131	+	2190	20	12	806	741	5442	5508	3354	3396
KQ76_05065	CP009361.1	1030110	1031594	+	1485	10	4	17	3	2473	2424	2001	2020
KQ76_05070	CP009361.1	1031587	1032615	+	1029	3	8	10	7	1667	1774	2111	1972
KQ76_05075	CP009361.1	1032618	1033184	+	567	14	4	27	15	1871	1903	932	915
KQ76_05080	CP009361.1	1033199	1034677	+	1479	12	15	19	27	3850	3734	1898	1890
KQ76_05085	CP009361.1	1034699	1035946	+	1248	17	10	224	927	2039	2099	1810	1923
KQ76_05090	CP009361.1	1036214	1037020	-	807	15	18	30	18	1146	1177	473	473
KQ76_05095	CP009361.1	1037013	1038413	-	1401	3	5	8	12	2892	2686	1311	1288
KQ76_05100	CP009361.1	1038428	1039003	-	576	1	2	6	1	278	258	452	421
KQ76_05115	CP009361.1	1039587	1039721	-	135	85	52	150	76	371	465	269	325
KQ76_05120	CP009361.1	1039873	1041168	+	1296	16	8	36	14	11668	11738	9144	8914
KQ76_05125	CP009361.1	1041593	1042765	+	1173	15	2	1356	1334	2756	2767	2659	2761
KQ76_05130	CP009361.1	1042819	1043361	+	543	3	4	3	4	3956	3905	3963	4068
KQ76_05135	CP009361.1	1043515	1043781	+	267	6	0	603	280	14822	15070	10703	10601
KQ76_05140	CP009361.1	1043784	1045502	+	1719	497	510	3218	3987	63635	63631	54720	53870
KQ76_05145	CP009361.1	1045739	1045972	-	234	2	1	3	3	351	360	337	330
KQ76_05150	CP009361.1	1046170	1047531	+	1362	8	5	12	13	139	183	256	268
KQ76_05160	CP009361.1	1048681	1049343	+	663	12	3	18	2	1347	1384	1919	1852
KQ76_05165	CP009361.1	1049691	1051388	-	1698	204	21	251	33	13884	13953	11071	11159
KQ76_05170	CP009361.1	1051388	1051606	-	219	0	0	5	0	2054	2050	1882	1839
KQ76_05175	CP009361.1	1051635	1051757	-	123	631	705	0	0	969	908	458	518
KQ76_05180	CP009361.1	1052088	1052639	-	552	12	4	27	7	1429	1353	1268	1246
KQ76_05185	CP009361.1	1053004	1053630	+	627	10	19	33	21	2351	2340	2317	2405
KQ76_05190	CP009361.1	1053801	1054913	+	1113	9	9	4912	5501	53534	52869	44841	44050
KQ76_05195	CP009361.1	1054917	1055894	+	978	368	604	30	23	33376	31605	28711	27556
KQ76_05200	CP009361.1	1055985	1057277	+	1293	241	696	1869	2046	60756	60258	53174	51023
KQ76_05205	CP009361.1	1057281	1058687	+	1407	855	940	1235	1347	32849	33001	31244	30644
KQ76_05210	CP009361.1	1058858	1059133	+	276	1	4	1	2	201	236	266	291
KQ76_05215	CP009361.1	1059277	1059816	+	540	6	13	17	31	412	381	338	329
KQ76_05220	CP009361.1	1059829	1060923	+	1095	21	5	28	10	530	505	699	671
KQ76_05225	CP009361.1	1060916	1061713	+	798	6	2	9	7	385	384	603	590
KQ76_05230	CP009361.1	1061719	1062528	+	810	30	14	21	11	624	702	597	558
KQ76_05235	CP009361.1	1062528	1063601	+	1074	23	6	1762	1741	928	849	1236	1235
KQ76_05240	CP009361.1	1063675	1064694	+	1020	989	986	34	33	7305	7308	6933	6738
KQ76_05245	CP009361.1	1064977	1065396	+	420	7	2	28	7	954	980	474	485
KQ76_05250	CP009361.1	1065478	1066830	-	1353	8	3	34	15	1997	1911	1659	1739
KQ76_05255	CP009361.1	1067014	1067628	-	615	3	7	7	2	2181	2165	2602	2496
KQ76_05260	CP009361.1	1067785	1068612	+	828	12	5	15	7	3082	3158	2253	2201
KQ76_05265	CP009361.1	1068766	1068957	-	192	27	55	1349	1320	2993	3058	1876	1820
KQ76_05270	CP009361.1	1069059	1070906	+	1848	23	12	225	108	2485	2516	2436	2480
KQ76_05275	CP009361.1	1071045	1071212	-	168	1	0	0	1	488	516	426	423
KQ76_05280	CP009361.1	1071214	1071696	-	483	6	9	11	15	2177	2180	2301	2544
KQ76_05285	CP009361.1	1071837	1072112	+	276	4	9	4	8	2342	2360	2387	2412
KQ76_05290	CP009361.1	1072426	1073652	+	1227	16	12	23	17	2426	2447	1496	1471
KQ76_05295	CP009361.1	1074205	1077657	+	3453	17	20	351	106	8223	8282	8221	8089
KQ76_05300	CP009361.1	1077925	1078836	-	912	9	11	27	10	913	946	806	830
KQ76_05305	CP009361.1	1079287	1080198	+	912	14	12	33	24	5024	5069	5348	5271
KQ76_05310	CP009361.1	1080223	1080684	+	462	5	6	55	19	1667	1731	1523	1380
KQ76_05320	CP009361.1	1081011	1082048	+	1038	16	13	30	16	2208	2097	1371	1378
KQ76_05325	CP009361.1	1082064	1082498	+	435	14	0	27	3	850	915	302	282
KQ76_05330	CP009361.1	1082565	1083494	-	930	37	41	76	37	946	921	1199	1187
KQ76_05335	CP009361.1	1083733	1083987	+	255	3	5	19	6	490	437	374	347
KQ76_05340	CP009361.1	1083990	1084379	-	390	3	3	6	3	1832	1842	1683	1587
KQ76_05345	CP009361.1	1084449	1084991	+	543	9	5	6	3	1044	1068	1139	1101
KQ76_05350	CP009361.1	1084993	1085475	+	483	35	3	24	10	794	773	661	667
KQ76_05355	CP009361.1	1085537	1086676	-	1140	11	4	15	12	490	473	644	631
KQ76_05360	CP009361.1	1086803	1087360	+	558	135	711	4	6	4821	4661	2424	2287
KQ76_05365	CP009361.1	1087272	1087496	-	225	0	3	0	0	1730	1867	2004	1822
KQ76_05370	CP009361.1	1087440	1087613	+	174	1	0	0	0	948	1058	708	704
KQ76_05375	CP009361.1	1087767	1089713	-	1947	45	34	46	70	1104	1123	671	678
KQ76_05380	CP009361.1	1089915	1090979	-	1065	5	9	14	20	4271	4167	4190	4060
KQ76_05385	CP009361.1	1091188	1091871	+	684	2	5	6	11	397	354	337	348
KQ76_05390	CP009361.1	1091871	1092947	+	1077	77	55	60	59	543	587	417	389
KQ76_05395	CP009361.1	1092944	1093822	+	879	3	4	20	9	512	449	181	202
KQ76_05400	CP009361.1	1093832	1094800	+	969	26	11	37	33	283	298	359	344
KQ76_05405	CP009361.1	1094862	1095596	+	735	12	10	15	7	301	240	343	349
KQ76_05410	CP009361.1	1095615	1095938	+	324	2	4	91	78	150	140	51	68
KQ76_05415	CP009361.1	1095975	1096082	+	108	0	0	0	1	89	100	39	25
KQ76_05420	CP009361.1	1096322	1097062	+	741	4	4	395	416	2028	2042	2203	2191
KQ76_05425	CP009361.1	1097443	1098501	+	1059	5	2	16	10	3053	3050	3147	3154
KQ76_05430	CP009361.1	1098501	1100903	+	2403	16	12	30	9	6218	6448	6167	6019
KQ76_05435	CP009361.1	1101205	1102143	-	939	49	46	61	77	930	938	963	973
KQ76_05440	CP009361.1	1102519	1102785	+	267	5	1	5	2	116	134	289	311
KQ76_05445	CP009361.1	1102786	1103307	+	522	6	6	7	1	549	528	519	510
KQ76_05450	CP009361.1	1103380	1105092	+	1713	17	12	27	33	1487	1429	1410	1343
KQ76_05455	CP009361.1	1105102	1107450	+	2349	929	130	1354	191	2307	2595	2523	2636
KQ76_05460	CP009361.1	1107623	1107937	+	315	1	1	1906	1892	4104	4352	2138	2195
KQ76_05465	CP009361.1	1108000	1108095	-	96	24	9	28	14	122	127	63	69
KQ76_05470	CP009361.1	1108261	1110042	+	1782	7	19	18	14	2190	2220	2864	2643
KQ76_05475	CP009361.1	1110366	1110980	+	615	4	8	3	6	4682	4744	5114	4965
KQ76_05480	CP009361.1	1111032	1112798	+	1767	8	6	9	10	17031	17245	16089	15659
KQ76_05485	CP009361.1	1112798	1113613	+	816	11	14	16	22	6620	6608	4964	4704
KQ76_05490	CP009361.1	1113852	1114652	+	801	10	2	19	5	2677	2627	2370	2389
KQ76_05495	CP009361.1	1114664	1115251	+	588	5	3	10	12	3372	3307	2579	2579
KQ76_05500	CP009361.1	1115244	1115747	+	504	2	1	8	5	894	871	900	860
KQ76_05505	CP009361.1	1115877	1116044	+	168	1	1	4	2	121	124	98	74
KQ76_05510	CP009361.1	1116238	1116555	+	318	24	30	40	33	763	846	458	431
KQ76_05515	CP009361.1	1116854	1116937	-	84	0	0	1	0	0	0	6	1
KQ76_05520	CP009361.1	1116903	1117289	-	387	2	5	1	6	85	67	82	91
KQ76_05525	CP009361.1	1117961	1118467	+	507	8	5	5	6	321	329	288	323
KQ76_05530	CP009361.1	1118724	1119221	+	498	12	11	19	13	145	174	341	312
KQ76_05535	CP009361.1	1119373	1119723	+	351	6	6	11	3	152	176	129	128
KQ76_05540	CP009361.1	1119972	1120157	-	186	2	15	10	20	476	465	740	708
KQ76_05545	CP009361.1	1120358	1120576	-	219	2	0	4	2	525	400	561	611
KQ76_05550	CP009361.1	1120767	1121000	-	234	13	8	11	12	1579	1516	937	844
KQ76_05555	CP009361.1	1121454	1122413	-	960	20	24	20	31	239	236	268	266
KQ76_05560	CP009361.1	1123081	1123227	+	147	2	2	12	1	436	431	1038	1073
KQ76_05565	CP009361.1	1123211	1123411	+	201	1	1	0	1	458	522	704	599
KQ76_05570	CP009361.1	1123713	1125359	+	1647	11	0	164	189	484	472	384	403
KQ76_05575	CP009361.1	1125729	1126445	-	717	9	8	10	7	373	350	268	268
KQ76_05580	CP009361.1	1126554	1127279	-	726	12	29	23	30	192	226	213	190
KQ76_05585	CP009361.1	1127389	1128114	-	726	2	9	14	6	210	214	192	175
KQ76_05590	CP009361.1	1128544	1129545	+	1002	6	4	17	12	227	220	192	198
KQ76_05595	CP009361.1	1129568	1130500	+	933	5	9	19	12	215	207	140	127
KQ76_05600	CP009361.1	1130671	1132227	+	1557	10	11	24	32	955	1157	401	390
KQ76_05605	CP009361.1	1132534	1132761	+	228	7	1	5	0	1570	1576	982	1007
KQ76_05610	CP009361.1	1133077	1134024	-	948	932	912	19	18	3068	3068	2573	2582
KQ76_05615	CP009361.1	1134271	1134468	+	198	5	4	4	1	244	249	248	217
KQ76_05620	CP009361.1	1134930	1135003	-	74	5	8	7	13	251	332	110	155
KQ76_05625	CP009361.1	1135367	1135501	+	135	0	0	0	0	1625	1652	1272	1271
KQ76_05630	CP009361.1	1135634	1136320	+	687	11	8	626	907	1189	1223	1030	1016
KQ76_05635	CP009361.1	1136428	1136868	-	441	3	1	5	3	1251	1301	1543	1500
KQ76_05640	CP009361.1	1137063	1138676	+	1614	23	30	46	26	1906	1892	1287	1241
KQ76_05645	CP009361.1	1138820	1139251	+	432	2	1	5	7	5269	5258	4330	4262
KQ76_05650	CP009361.1	1139267	1140202	+	936	20	9	669	862	6712	6835	7635	7445
KQ76_05655	CP009361.1	1140216	1140617	+	402	8	13	10	7	2758	2859	3181	3199
KQ76_05660	CP009361.1	1140598	1142832	+	2235	27	16	48	25	4964	4950	3926	3866
KQ76_05665	CP009361.1	1143124	1144089	+	966	460	451	36	15	1199	1198	1523	1488
KQ76_05670	CP009361.1	1144091	1145440	+	1350	8	16	9	15	3935	3980	3011	3186
KQ76_05675	CP009361.1	1145456	1146775	+	1320	43	25	48	32	5513	5537	5760	5617
KQ76_05680	CP009361.1	1146881	1148287	+	1407	23	34	1611	1626	31056	30890	28646	28529
KQ76_05685	CP009361.1	1148320	1149492	+	1173	830	790	3431	3507	40339	40076	35814	35705
KQ76_05690	CP009361.1	1149750	1150541	+	792	3	0	9	11	2375	2291	1745	1769
KQ76_05695	CP009361.1	1150559	1151233	+	675	8	7	1704	1690	5751	5748	4705	4708
KQ76_05700	CP009361.1	1151239	1151793	+	555	37	64	49	53	5250	5342	4788	4812
KQ76_05705	CP009361.1	1151805	1152095	+	291	1	8	4	6	3158	3058	2126	2148
KQ76_05710	CP009361.1	1152178	1152984	+	807	8	6	16	5	2589	2526	2305	2123
KQ76_05715	CP009361.1	1153008	1153625	+	618	40	4	158	9	4271	4269	4608	4378
KQ76_05720	CP009361.1	1153846	1156599	+	2754	47	20	26	26	16741	16544	15833	15697
KQ76_05725	CP009361.1	1156710	1157657	-	948	3	5	7	8	475	497	378	377
KQ76_05730	CP009361.1	1157932	1158729	+	798	4	2	12	5	414	433	684	662
KQ76_05735	CP009361.1	1158978	1159469	+	492	13	4	29	8	778	777	296	304
KQ76_05740	CP009361.1	1159469	1160386	+	918	4	3	2	6	974	1004	1201	1139
KQ76_05745	CP009361.1	1160788	1161315	+	528	3	2	4	0	2013	1974	2458	2447
KQ76_05750	CP009361.1	1161533	1162840	+	1308	27	14	54	43	12470	12481	9400	9242
KQ76_05755	CP009361.1	1162868	1163749	+	882	28	36	3063	3110	20651	20670	19546	19147
KQ76_05760	CP009361.1	1163767	1165038	+	1272	7	10	4	4	28221	28086	24064	23694
KQ76_05765	CP009361.1	1165044	1166144	+	1101	9	2	13	6	18710	19564	19343	19920
KQ76_05770	CP009361.1	1166137	1169310	+	3174	32	28	27	34	88397	88323	73373	72261
KQ76_05775	CP009361.1	1169420	1170112	+	693	5	4	698	668	16296	16135	16243	16117
KQ76_05780	CP009361.1	1170112	1170723	+	612	0	0	3	7	13486	13784	13999	14045
KQ76_05785	CP009361.1	1170753	1170965	+	213	66	61	107	43	3309	3346	4250	4118
KQ76_05795	CP009361.1	1171402	1171803	+	402	2	2	2	2	826	680	665	647
KQ76_05800	CP009361.1	1172066	1173763	-	1698	39	25	52	51	2177	2150	2264	2131
KQ76_05805	CP009361.1	1174038	1174661	+	624	7	4	1142	1315	7722	7990	6718	7100
KQ76_05810	CP009361.1	1174661	1174879	+	219	2	1	6	2	2097	2205	1749	1669
KQ76_05815	CP009361.1	1175095	1176294	+	1200	13	8	12	16	1878	1942	1561	1535
KQ76_05820	CP009361.1	1176294	1178702	+	2409	24	32	62	54	4173	4120	4204	4148
KQ76_05825	CP009361.1	1179205	1180158	+	954	11	19	32	27	780	801	900	915
KQ76_05830	CP009361.1	1180321	1180524	-	204	95	306	6	3	2208	2242	1483	1500
KQ76_05835	CP009361.1	1180823	1181311	+	489	4	1	5	0	580	572	221	229
KQ76_05840	CP009361.1	1181304	1182239	+	936	6	3	4	3	1472	1498	790	784
KQ76_05845	CP009361.1	1182236	1183543	+	1308	40	11	22	15	2627	2591	2167	2219
KQ76_05850	CP009361.1	1183546	1184640	+	1095	23	14	31	8	5289	5793	4139	3913
KQ76_05855	CP009361.1	1184647	1185390	+	744	7	12	22	21	1558	1583	1502	1527
KQ76_05860	CP009361.1	1185387	1187381	+	1995	33	18	46	42	6483	6422	5049	4987
KQ76_05865	CP009361.1	1187609	1188484	+	876	10	8	21	7	1509	1530	1514	1449
KQ76_05870	CP009361.1	1188485	1189129	+	645	5	2	6	8	569	613	1328	1261
KQ76_05875	CP009361.1	1189136	1189777	+	642	3	2	5	2	997	965	996	976
KQ76_05880	CP009361.1	1190158	1190346	-	189	1136	1146	14	14	27058	27450	18833	18850
KQ76_05885	CP009361.1	1190789	1191163	+	375	6	3	11	14	1884	1748	2022	1976
KQ76_05890	CP009361.1	1191178	1192824	+	1647	15	24	23	36	7565	7681	6759	6707
KQ76_05895	CP009361.1	1193014	1195074	+	2061	37	19	31	23	2620	2637	1096	1106
KQ76_05900	CP009361.1	1195292	1195849	+	558	7	2	8	10	1521	1564	1464	1345
KQ76_05905	CP009361.1	1195854	1196840	+	987	0	12	8	8	1627	1679	1517	1481
KQ76_05910	CP009361.1	1196833	1197759	+	927	5	8	15	4	3132	3121	2544	2488
KQ76_05915	CP009361.1	1197752	1198486	+	735	16	7	8	4	2031	2283	1833	1858
KQ76_05920	CP009361.1	1198729	1198833	-	105	1	1	396	520	1060	1036	1151	1077
KQ76_05925	CP009361.1	1198855	1199088	+	234	2	1	698	849	8730	8916	6717	6783
KQ76_05930	CP009361.1	1199204	1199935	+	732	17	10	16	16	624	637	1146	1102
KQ76_05935	CP009361.1	1200082	1203648	+	3567	59	51	83	94	5878	5897	6171	6148
KQ76_05940	CP009361.1	1203648	1204898	+	1251	6	5	13	13	2934	2964	2650	2582
KQ76_05945	CP009361.1	1204885	1205217	+	333	7	2	17	5	1845	1752	1553	1574
KQ76_05950	CP009361.1	1205243	1206610	+	1368	41	13	96	54	6116	6206	5475	5361
KQ76_05955	CP009361.1	1207045	1207320	+	276	0	0	2	1	3601	3712	2677	2624
KQ76_05960	CP009361.1	1207508	1208011	+	504	3	3	4	3	326	292	379	363
KQ76_05965	CP009361.1	1208011	1208748	+	738	6	5	13	4	660	702	599	571
KQ76_05970	CP009361.1	1208851	1209201	+	351	10	15	1	3	4721	4733	4327	4265
KQ76_05975	CP009361.1	1209355	1209516	+	162	0	0	1	0	13	15	14	9
KQ76_05980	CP009361.1	1209445	1212051	-	2607	37	23	72	38	2008	1882	1687	1731
KQ76_05985	CP009361.1	1212452	1213336	+	885	8	10	12	6	1048	1018	730	700
KQ76_05990	CP009361.1	1213320	1214087	+	768	6	1	12	9	778	803	678	672
KQ76_05995	CP009361.1	1214196	1215362	+	1167	24	7	1153	1175	16403	16333	11842	11857
KQ76_06000	CP009361.1	1215384	1216292	+	909	236	342	17	17	9269	9160	8120	7956
KQ76_06005	CP009361.1	1216519	1217637	+	1119	49	26	72	32	228	236	296	301
KQ76_06010	CP009361.1	1217665	1218909	+	1245	350	265	58	30	914	869	519	494
KQ76_06015	CP009361.1	1219081	1219953	+	873	16	14	31	16	717	692	199	192
KQ76_06020	CP009361.1	1220133	1222202	+	2070	39	32	86	50	10464	10377	8803	8556
KQ76_06025	CP009361.1	1222358	1223665	+	1308	9	14	16	9	5989	6210	5005	4793
KQ76_06030	CP009361.1	1224083	1224979	+	897	8	4	47	39	3341	3349	1991	1910
KQ76_06035	CP009361.1	1224976	1225521	+	546	9	1	17	9	1564	1483	1320	1327
KQ76_06040	CP009361.1	1225587	1226990	+	1404	7	4	14	10	5648	5475	4054	3861
KQ76_06045	CP009361.1	1227015	1227788	+	774	42	75	17	10	3992	3997	2958	2988
KQ76_06050	CP009361.1	1227839	1227931	+	93	3	1	2	4	54	86	132	108
KQ76_06055	CP009361.1	1228130	1228897	+	768	17	8	16	14	10051	10005	8616	8395
KQ76_06060	CP009361.1	1228931	1229044	+	114	1	0	8	4	1731	1753	1661	1583
KQ76_06065	CP009361.1	1229079	1229960	+	882	7	3	1593	1541	16232	15994	16419	16283
KQ76_06070	CP009361.1	1230097	1230819	+	723	14	24	468	465	6950	6966	6588	6628
KQ76_06075	CP009361.1	1230838	1231392	+	555	9	5	7	5	9173	9194	7491	7478
KQ76_06080	CP009361.1	1231765	1232535	+	771	3	23	40	33	2479	2443	1964	1967
KQ76_06085	CP009361.1	1232542	1233324	+	783	438	459	13	10	1681	1664	1418	1338
KQ76_06090	CP009361.1	1233536	1234822	+	1287	8	12	10	10	4695	4642	4200	4117
KQ76_06095	CP009361.1	1234842	1236545	+	1704	1065	1104	18	9	9209	9126	6107	6058
KQ76_06100	CP009361.1	1236803	1241119	+	4317	45	22	72	39	7499	7449	5941	5905
KQ76_06105	CP009361.1	1241409	1241876	+	468	9	6	8	8	1423	1418	1169	1079
KQ76_06110	CP009361.1	1241897	1243072	+	1176	32	8	17	6	3641	3561	2746	2712
KQ76_06115	CP009361.1	1243093	1243377	+	285	12	14	1512	1486	1358	1462	1319	1236
KQ76_06120	CP009361.1	1243374	1243691	+	318	0	1	7	3	1543	1415	1380	1376
KQ76_06125	CP009361.1	1243696	1245813	+	2118	73	63	807	802	14478	14310	12377	12037
KQ76_06130	CP009361.1	1246200	1246550	+	351	6	5	9	13	1267	1329	1697	1676
KQ76_06135	CP009361.1	1246720	1247637	+	918	6	12	13	11	1514	1529	1103	1040
KQ76_06140	CP009361.1	1247652	1248623	+	972	14	2	20	12	2241	2275	1908	1872
KQ76_06145	CP009361.1	1248738	1249007	+	270	2	1	5	4	2394	2487	2312	2321
KQ76_06150	CP009361.1	1249375	1251471	+	2097	672	809	438	356	19654	19940	15773	15486
KQ76_06155	CP009361.1	1251707	1253380	+	1674	25	13	41	17	12286	12750	9558	9447
KQ76_06160	CP009361.1	1253637	1256006	+	2370	249	108	297	143	4245	4552	3589	3646
KQ76_06165	CP009361.1	1256011	1256724	+	714	4	2	520	516	1389	1345	1214	1200
KQ76_06170	CP009361.1	1256755	1258020	+	1266	9	8	156	99	2919	2882	2255	2113
KQ76_06175	CP009361.1	1258020	1259306	+	1287	10	12	17	13	3624	3789	3340	3481
KQ76_06180	CP009361.1	1259306	1260010	+	705	2	3	3	4	1381	1538	1334	1331
KQ76_06185	CP009361.1	1260115	1260942	+	828	7	2	6	8	2861	2912	2583	2454
KQ76_06190	CP009361.1	1260961	1261353	+	393	3	2	8	1	387	364	646	599
KQ76_06195	CP009361.1	1261387	1261965	+	579	8	11	7	8	1599	1611	1051	1034
KQ76_06200	CP009361.1	1262190	1263341	+	1152	8	4	13	12	955	963	963	945
KQ76_06205	CP009361.1	1263506	1264549	+	1044	4	5	13	7	6403	6522	6898	6884
KQ76_06210	CP009361.1	1264903	1266462	+	1560	33	27	29	24	13613	13320	12953	12683
KQ76_06215	CP009361.1	1266758	1266973	-	216	3	2	7	3	186	210	163	138
KQ76_06220	CP009361.1	1267147	1267944	+	798	594	598	21	25	2074	2063	2493	2379
KQ76_06225	CP009361.1	1268084	1269844	+	1761	31	566	45	13	7286	7093	7179	7019
KQ76_06230	CP009361.1	1269845	1270711	+	867	7	4	5	12	3277	3666	2664	2784
KQ76_06235	CP009361.1	1270806	1271099	+	294	3	1	6	2	456	505	470	513
KQ76_06240	CP009361.1	1271233	1272777	+	1545	53	11	894	839	7903	7934	5669	5617
KQ76_06245	CP009361.1	1272778	1273143	+	366	2	2	4	7	2116	2182	2319	2275
KQ76_06250	CP009361.1	1273170	1273661	+	492	1	3	18	6	1529	1425	1070	1040
KQ76_06255	CP009361.1	1273964	1276582	+	2619	22	12	63	34	3245	3322	2790	2748
KQ76_06260	CP009361.1	1276595	1278604	+	2010	27	35	39	39	2945	2833	2871	2799
KQ76_06265	CP009361.1	1278610	1279152	+	543	4	12	19	33	734	741	787	851
KQ76_06270	CP009361.1	1279627	1280445	+	819	6	13	9	13	825	828	662	626
KQ76_06275	CP009361.1	1280575	1282071	+	1497	9	13	8	11	1214	1273	1107	1130
KQ76_06280	CP009361.1	1282229	1283902	+	1674	21	9	268	202	3258	3219	2973	3179
KQ76_06285	CP009361.1	1284052	1284966	+	915	22	55	48	53	843	883	924	966
KQ76_06295	CP009361.1	1285934	1286167	+	234	2	2	0	1	191	159	361	355
KQ76_06300	CP009361.1	1286389	1286865	-	477	5	5	22	11	2789	2883	2275	2181
KQ76_06305	CP009361.1	1286977	1288215	+	1239	12	14	21	24	795	783	772	721
KQ76_06310	CP009361.1	1288234	1289472	+	1239	6	5	523	439	1736	1741	1301	1302
KQ76_06315	CP009361.1	1289716	1290084	+	369	741	796	5	9	3461	3493	3275	3239
KQ76_06320	CP009361.1	1290103	1291443	+	1341	18	8	38	15	23815	24211	20552	20486
KQ76_06330	CP009361.1	1291937	1292134	+	198	2	4	5	10	536	541	468	488
KQ76_06340	CP009361.1	1292836	1293048	+	213	3	2	3	4	160	230	91	136
KQ76_06345	CP009361.1	1293345	1293551	+	207	0	0	6	0	264	255	123	126
KQ76_06350	CP009361.1	1294253	1294363	+	111	56	40	57	44	168	222	244	267
KQ76_06355	CP009361.1	1294756	1294941	+	186	4	0	1	6	121	109	55	72
KQ76_06360	CP009361.1	1295153	1296100	-	948	1	3	8	6	401	430	382	395
KQ76_06365	CP009361.1	1296527	1296943	+	417	12	4	26	11	189	183	287	289
KQ76_06375	CP009361.1	1297846	1298049	-	204	22	18	69	26	165	174	187	170
KQ76_06380	CP009361.1	1298065	1298196	-	132	3	6	1	5	26	40	22	26
KQ76_06385	CP009361.1	1298464	1298715	+	252	9	6	18	1	119	122	71	82
KQ76_06390	CP009361.1	1298920	1299441	+	522	20	17	18	25	1391	1390	948	996
KQ76_06395	CP009361.1	1299443	1299640	+	198	0	4	8	1	151	155	154	152
KQ76_06400	CP009361.1	1299705	1299833	+	129	0	0	1	3	6	13	9	15
KQ76_06405	CP009361.1	1299800	1300384	+	585	17	10	22	20	115	162	119	97
KQ76_06415	CP009361.1	1300711	1300908	+	198	9	24	14	34	152	172	134	161
KQ76_06425	CP009361.1	1301237	1301431	+	195	0	1	3	4	38	38	34	51
KQ76_06440	CP009361.1	1302188	1302436	+	249	5	5	16	12	317	335	213	204
KQ76_06445	CP009361.1	1302587	1302865	+	279	2	3	6	2	18	30	24	26
KQ76_06450	CP009361.1	1302911	1303177	+	267	3	2	8	6	129	145	148	148
KQ76_06455	CP009361.1	1303186	1303311	+	126	0	1	1	2	37	34	59	43
KQ76_06460	CP009361.1	1303514	1303714	+	201	2	2	3	1	104	118	59	46
KQ76_06465	CP009361.1	1303721	1303918	+	198	2	3	14	1	122	120	55	46
KQ76_06470	CP009361.1	1304465	1305490	-	1026	8	4	10	6	470	470	377	407
KQ76_06475	CP009361.1	1305760	1305957	+	198	5	1	2	7	497	563	491	544
KQ76_06480	CP009361.1	1306014	1307495	+	1482	12	17	36	27	7542	7552	6703	6560
KQ76_06485	CP009361.1	1307678	1308577	+	900	14	3	19	11	190	191	202	194
KQ76_06490	CP009361.1	1308546	1309277	+	732	316	312	35	8	246	256	170	182
KQ76_06495	CP009361.1	1309281	1310372	+	1092	86	71	153	76	585	636	718	727
KQ76_06500	CP009361.1	1310369	1310971	+	603	4	4	17	8	365	365	192	179
KQ76_06505	CP009361.1	1311084	1311272	-	189	2	1	9	3	530	515	240	236
KQ76_06510	CP009361.1	1311411	1311944	+	534	6	2	18	10	586	616	753	730
KQ76_06515	CP009361.1	1312087	1312941	-	855	7	3	21	11	1320	1297	1440	1402
KQ76_06520	CP009361.1	1313272	1313847	+	576	3	4	12	11	335	354	269	254
KQ76_06525	CP009361.1	1313901	1315283	-	1383	21	11	58	28	639	632	513	550
KQ76_06530	CP009361.1	1315474	1316754	+	1281	10	14	13	12	1613	1925	1547	1532
KQ76_06535	CP009361.1	1316760	1317821	+	1062	4	1	10	9	872	917	930	900
KQ76_06540	CP009361.1	1317823	1318737	+	915	7	5	4	6	441	456	531	509
KQ76_06545	CP009361.1	1318795	1319598	+	804	1	3	11	6	7137	7136	4185	4039
KQ76_06550	CP009361.1	1319890	1320204	-	315	12	1	5	2	193	215	461	411
KQ76_06555	CP009361.1	1320179	1320283	-	105	2	0	4	2	15	19	36	63
KQ76_06560	CP009361.1	1320423	1321877	-	1455	7	11	19	24	7832	7948	8484	8387
KQ76_06565	CP009361.1	1322081	1323598	+	1518	13	8	18	9	18485	18078	11853	11940
KQ76_06570	CP009361.1	1323689	1323838	+	150	5	3	4	1	2139	2184	1890	1855
KQ76_06575	CP009361.1	1324292	1324561	+	270	10	13	9	11	147	153	23	31
KQ76_06580	CP009361.1	1324718	1325695	+	978	6	7	9	5	574	628	196	234
KQ76_06585	CP009361.1	1325692	1325796	-	105	0	0	3	2	46	44	65	63
KQ76_06590	CP009361.1	1325870	1326733	+	864	9	32	17	29	1593	1545	1154	1101
KQ76_06600	CP009361.1	1327113	1327736	-	624	439	620	9	4	3578	3542	1818	1794
KQ76_06605	CP009361.1	1327876	1328112	+	237	8	1	2	0	49	35	162	132
KQ76_06610	CP009361.1	1328248	1328487	+	240	36	21	62	29	1293	1263	757	783
KQ76_06615	CP009361.1	1328608	1330596	+	1989	10	7	2176	2189	45433	45681	40705	40362
KQ76_06620	CP009361.1	1330874	1331116	+	243	11	8	3	0	4756	4815	3484	3459
KQ76_06625	CP009361.1	1331103	1331201	+	99	1	2	9	0	65	45	66	54
KQ76_06630	CP009361.1	1331295	1331762	+	468	20	7	25	27	790	742	908	860
KQ76_06635	CP009361.1	1331886	1333007	+	1122	16	14	41	16	702	678	790	746
KQ76_06640	CP009361.1	1333011	1336040	+	3030	62	59	93	73	2340	2315	2154	2107
KQ76_06645	CP009361.1	1336111	1336473	-	363	11	15	20	27	1278	1276	1898	1900
KQ76_06650	CP009361.1	1336677	1338323	+	1647	26	16	44	25	5269	5408	3788	3722
KQ76_06655	CP009361.1	1338891	1341596	+	2706	738	856	24	8	42129	42247	38100	37082
KQ76_06660	CP009361.1	1341777	1342244	+	468	7	6	5	4	1217	1202	1444	1465
KQ76_06665	CP009361.1	1342453	1342749	-	297	19	15	55	15	607	673	447	472
KQ76_06670	CP009361.1	1343127	1343735	-	609	14	15	14	17	2810	2818	1888	1828
KQ76_06675	CP009361.1	1343941	1345932	+	1992	78	16	862	879	5603	5582	3755	3719
KQ76_06680	CP009361.1	1345932	1348334	+	2403	27	7	22	10	6404	6419	6442	6386
KQ76_06685	CP009361.1	1348462	1348560	-	99	2	0	5	0	769	844	259	294
KQ76_06690	CP009361.1	1348584	1350044	+	1461	1207	1194	28	15	5505	5783	5461	5432
KQ76_06695	CP009361.1	1350544	1351395	+	852	5	8	46	36	808	775	885	862
KQ76_06700	CP009361.1	1351370	1351537	+	168	1	0	2	2	117	168	165	155
KQ76_06705	CP009361.1	1351530	1352738	+	1209	13	6	33	19	5911	5791	4675	4573
KQ76_06710	CP009361.1	1353219	1355741	+	2523	1529	1490	58	22	17504	17780	15351	15050
KQ76_06715	CP009361.1	1355944	1356453	-	510	7	12	17	12	1648	1636	818	847
KQ76_06720	CP009361.1	1356590	1357573	+	984	47	13	74	27	1156	1154	1654	1561
KQ76_06725	CP009361.1	1357604	1359250	-	1647	3	4	171	169	491	470	395	432
KQ76_06730	CP009361.1	1359574	1359759	-	186	1	1	1	1	1530	1593	1025	1013
KQ76_06735	CP009361.1	1359907	1361169	+	1263	7	6	12	11	218	231	259	253
KQ76_06740	CP009361.1	1361305	1362396	-	1092	10	1	7	7	812	842	814	893
KQ76_06745	CP009361.1	1362561	1363592	+	1032	8	8	14	11	3714	3683	1870	1852
KQ76_06750	CP009361.1	1364085	1365491	+	1407	17	8	45	28	403	419	322	336
KQ76_06755	CP009361.1	1365488	1366054	+	567	11	0	2	3	60	69	183	158
KQ76_06760	CP009361.1	1366060	1367058	+	999	11	11	49	2	237	246	171	180
KQ76_06765	CP009361.1	1367060	1367842	+	783	4	2	16	13	190	197	217	216
KQ76_06770	CP009361.1	1367839	1368474	+	636	8	22	15	15	192	188	117	103
KQ76_06775	CP009361.1	1368467	1369681	+	1215	25	7	40	10	384	392	257	221
KQ76_06780	CP009361.1	1369674	1370402	+	729	8	7	26	80	289	324	164	178
KQ76_06785	CP009361.1	1370724	1371986	+	1263	27	20	51	20	4876	4703	4668	4812
KQ76_06790	CP009361.1	1372005	1373264	+	1260	13	15	18	15	6070	6194	5515	5324
KQ76_06800	CP009361.1	1374743	1375201	-	459	4	2	11	1	349	325	563	538
KQ76_06805	CP009361.1	1375324	1376025	-	702	2	11	14	5	349	363	291	266
KQ76_06810	CP009361.1	1376018	1376791	-	774	4	3	5	7	193	212	208	167
KQ76_06815	CP009361.1	1376778	1377608	-	831	6	5	10	10	222	228	298	275
KQ76_06820	CP009361.1	1377601	1378587	-	987	14	16	150	21	376	367	687	660
KQ76_06825	CP009361.1	1378758	1378943	-	186	10	16	26	19	47	62	41	72
KQ76_06830	CP009361.1	1378891	1379235	-	345	6	6	4	6	631	645	260	273
KQ76_06835	CP009361.1	1379440	1381254	+	1815	20	12	24	13	5100	5118	4931	4756
KQ76_06840	CP009361.1	1381394	1382035	-	642	2	6	9	3	248	191	136	128
KQ76_06845	CP009361.1	1382042	1382893	-	852	12	7	12	15	254	224	171	148
KQ76_06850	CP009361.1	1382940	1383857	-	918	4	5	7	13	353	304	142	123
KQ76_06855	CP009361.1	1383859	1384785	-	927	198	104	466	193	261	554	259	500
KQ76_06860	CP009361.1	1384976	1385959	-	984	19	10	34	28	251	258	354	323
KQ76_06865	CP009361.1	1386270	1387172	-	903	6	3	8	5	2071	2051	2448	2449
KQ76_06870	CP009361.1	1387319	1388920	+	1602	154	133	225	131	6188	6166	6630	6589
KQ76_06875	CP009361.1	1389777	1390982	+	1206	12	1	22	14	4602	4631	3499	3379
KQ76_06880	CP009361.1	1391046	1392035	+	990	16	7	17	7	4044	4096	3367	3290
KQ76_06885	CP009361.1	1392037	1392924	+	888	4	0	5	2	3182	3192	3829	3817
KQ76_06890	CP009361.1	1392921	1393643	+	723	4	4	9	5	4040	4214	3901	3758
KQ76_06895	CP009361.1	1393670	1394389	+	720	1433	1429	7	3	3568	3329	3172	3054
KQ76_06900	CP009361.1	1394532	1395683	+	1152	10	3	5	14	3100	3193	2967	2893
KQ76_06905	CP009361.1	1395688	1396773	+	1086	4	2	15	13	3470	3403	2507	2463
KQ76_06910	CP009361.1	1396763	1398028	+	1266	36	61	66	35	4775	4740	4572	4642
KQ76_06915	CP009361.1	1398264	1398665	-	402	19	5	8	5	338	324	317	303
KQ76_06920	CP009361.1	1398862	1399062	-	201	0	0	1	3	10738	11316	6900	7123
KQ76_06925	CP009361.1	1399097	1399285	+	189	2	4	4	3	245	311	125	100
KQ76_06930	CP009361.1	1399233	1399541	-	309	2	0	6	3	110	129	218	226
KQ76_06935	CP009361.1	1399703	1399972	+	270	1	1	996	1135	522	471	632	656
KQ76_06940	CP009361.1	1399997	1400620	+	624	11	4	7	7	1772	1817	1199	1182
KQ76_06945	CP009361.1	1400652	1401788	+	1137	6	1	1836	1779	2675	2639	1914	1855
KQ76_06950	CP009361.1	1401856	1403199	-	1344	18	8	14	12	2172	2114	1586	1489
KQ76_06955	CP009361.1	1403424	1405310	-	1887	17	10	38	30	3177	3107	3695	3655
KQ76_06960	CP009361.1	1405324	1406115	-	792	7	3	16	14	2600	2608	1962	1903
KQ76_06965	CP009361.1	1406296	1406499	-	204	0	2	1	1	830	839	964	951
KQ76_06970	CP009361.1	1406528	1407337	-	810	391	563	6	5	3958	4073	3333	3329
KQ76_06975	CP009361.1	1407927	1409198	-	1272	84	59	1492	1448	11003	10921	9472	9420
KQ76_06980	CP009361.1	1409212	1412010	-	2799	17	9	165	122	19405	19043	17261	16836
KQ76_06990	CP009361.1	1412484	1413839	-	1356	34	28	74	32	2331	2425	1674	1690
KQ76_06995	CP009361.1	1413836	1414495	-	660	7	5	7	6	1606	1762	1536	1438
KQ76_07005	CP009361.1	1414965	1415165	-	201	3	3	15	9	282	266	220	188
KQ76_07010	CP009361.1	1415282	1415896	-	615	21	5	48	10	3747	3674	3184	3086
KQ76_07015	CP009361.1	1415913	1416983	-	1071	10	7	17	12	6212	6250	5337	5224
KQ76_07020	CP009361.1	1416995	1417504	-	510	3	3	4	8	2080	2100	1610	1583
KQ76_07025	CP009361.1	1417905	1419395	-	1491	20	13	66	38	3175	3220	4185	4121
KQ76_07040	CP009361.1	1420655	1420876	-	222	1	0	4	3	1436	1465	1479	1643
KQ76_07045	CP009361.1	1420876	1421376	-	501	4	2	16	3	7342	7594	4746	4754
KQ76_07050	CP009361.1	1421388	1421816	-	429	1477	1459	231	180	5210	5405	5014	4893
KQ76_07055	CP009361.1	1421809	1422342	-	534	4	1	222	203	6693	6705	5822	5842
KQ76_07060	CP009361.1	1422428	1423267	-	840	8	3	8	5	4984	4998	4414	4343
KQ76_07065	CP009361.1	1423282	1423761	-	480	2	4	14	13	3801	3721	3047	3013
KQ76_07070	CP009361.1	1423961	1424917	-	957	1	3	10	13	3629	3637	3389	3352
KQ76_07075	CP009361.1	1425341	1425778	-	438	1	0	2	0	1434	1494	1252	1219
KQ76_07080	CP009361.1	1425794	1426918	-	1125	7	7	17	6	4354	4167	4266	4149
KQ76_07085	CP009361.1	1426956	1427207	-	252	4	0	10	1	800	802	907	815
KQ76_07090	CP009361.1	1427219	1427413	-	195	1	7	4	10	1805	1832	1140	1131
KQ76_07095	CP009361.1	1427658	1428362	+	705	4	0	3	2	358	359	502	500
KQ76_07100	CP009361.1	1428527	1428673	-	147	2	1	1	0	12	10	8	10
KQ76_07105	CP009361.1	1428603	1429004	+	402	12	4	16	9	71	78	104	90
KQ76_07110	CP009361.1	1429063	1459320	-	30258	788	667	668	495	5128	5444	5191	5383
KQ76_07115	CP009361.1	1459721	1461112	-	1392	8	9	24	13	314	301	349	358
KQ76_07120	CP009361.1	1461269	1462591	-	1323	10	22	29	22	620	649	209	217
KQ76_07125	CP009361.1	1462622	1463662	-	1041	10	7	14	8	265	266	111	96
KQ76_07130	CP009361.1	1463757	1464875	-	1119	15	22	14	21	799	752	621	645
KQ76_07135	CP009361.1	1465350	1466228	-	879	1	3	7	7	2530	2529	2548	2465
KQ76_07140	CP009361.1	1466248	1469688	-	3441	91	317	95	37	6219	6127	7353	7335
KQ76_07145	CP009361.1	1469992	1471332	+	1341	21	28	32	14	666	683	350	351
KQ76_07165	CP009361.1	1472094	1473239	-	1146	4	3	12	6	1367	1376	1571	1496
KQ76_07175	CP009361.1	1473890	1474234	-	345	8	2	22	11	3672	3543	4319	4385
KQ76_07180	CP009361.1	1474248	1474811	-	564	2	0	12	2	4825	5065	4263	4180
KQ76_07185	CP009361.1	1474804	1475154	-	351	2	0	3	1	4040	3922	3121	3039
KQ76_07190	CP009361.1	1475217	1475387	-	171	106	8	15	2	61	54	78	74
KQ76_07195	CP009361.1	1475693	1476319	+	627	8	8	18	21	3492	3570	2419	2337
KQ76_07200	CP009361.1	1476316	1478466	+	2151	19	16	750	1060	18104	18155	17025	17229
KQ76_07205	CP009361.1	1479016	1479357	-	342	1	1	6	4	288	269	265	262
KQ76_07210	CP009361.1	1479362	1480021	-	660	2	4	5	5	218	230	741	699
KQ76_07215	CP009361.1	1480011	1480697	-	687	9	9	12	8	1119	1121	1101	1088
KQ76_07220	CP009361.1	1481026	1482318	-	1293	3	2	898	977	11393	11391	12196	11847
KQ76_07225	CP009361.1	1482640	1485333	-	2694	99	73	975	917	4299	4605	3726	3802
KQ76_07230	CP009361.1	1485357	1486328	-	972	7	5	21	8	1218	1256	965	1010
KQ76_07235	CP009361.1	1486315	1487517	-	1203	5	5	9	14	2247	2476	1226	1204
KQ76_07240	CP009361.1	1487522	1488664	-	1143	7	24	16	29	2266	2223	1197	1090
KQ76_07245	CP009361.1	1488908	1489225	-	318	9	9	7	10	468	486	281	266
KQ76_07250	CP009361.1	1489561	1490241	-	681	12	10	7	6	7079	7212	5967	5887
KQ76_07255	CP009361.1	1490313	1490900	-	588	7	12	20	10	1264	1324	761	819
KQ76_07260	CP009361.1	1490890	1491465	-	576	5	3	11	2	2193	2228	1367	1293
KQ76_07265	CP009361.1	1491479	1492723	-	1245	8	2	106	53	4455	4483	5209	5271
KQ76_07270	CP009361.1	1492730	1494028	-	1299	14	5	20	17	3627	3619	3832	4019
KQ76_07275	CP009361.1	1494038	1495102	-	1065	13	4	37	16	3962	3872	3000	2927
KQ76_07280	CP009361.1	1495128	1496294	-	1167	14	6	20	9	2827	2900	2875	2782
KQ76_07285	CP009361.1	1496763	1497212	-	450	2	2	2	1	1276	1219	515	525
KQ76_07290	CP009361.1	1497304	1498263	-	960	13	4	14	9	4221	4697	4014	4013
KQ76_07295	CP009361.1	1498265	1498990	-	726	10	5	13	8	4134	4152	3965	3795
KQ76_07300	CP009361.1	1498993	1499565	-	573	5	6	11	8	2294	2243	1770	1726
KQ76_07305	CP009361.1	1499492	1499806	+	315	0	1	1	2	103	103	96	86
KQ76_07310	CP009361.1	1499996	1500268	-	273	1	1	2903	2874	27068	27577	24554	24577
KQ76_07315	CP009361.1	1500439	1501437	-	999	2	2	3	2	4258	4390	4209	4191
KQ76_07320	CP009361.1	1501454	1502764	-	1311	8	9	9	13	8855	8890	7298	7097
KQ76_07325	CP009361.1	1502986	1504161	-	1176	7	11	1610	1677	17155	17393	15185	14699
KQ76_07330	CP009361.1	1504418	1504609	-	192	5	1	0	2	34	62	49	53
KQ76_07335	CP009361.1	1504563	1504700	+	138	0	1	1	1	45	43	32	35
KQ76_07340	CP009361.1	1504726	1504842	-	117	1	0	4	1	75	61	36	35
KQ76_07345	CP009361.1	1504873	1505532	-	660	3	22	13	7	2102	2035	1133	1148
KQ76_07350	CP009361.1	1505609	1506577	+	969	2	14	31	15	1811	1828	2324	2260
KQ76_07355	CP009361.1	1506692	1507678	-	987	3	9	17	9	3185	3218	2599	2550
KQ76_07360	CP009361.1	1507839	1507925	-	87	5	14	8	7	148	139	142	120
KQ76_07365	CP009361.1	1508063	1509523	-	1461	1077	1202	2616	2518	20904	20651	16562	16301
KQ76_07370	CP009361.1	1509676	1511055	-	1380	16	2	13	22	1609	1600	1712	1722
KQ76_07375	CP009361.1	1511045	1511998	-	954	12	7	17	4	2394	2230	1529	1407
KQ76_07380	CP009361.1	1512106	1512354	+	249	0	1	1	4	225	217	213	236
KQ76_07385	CP009361.1	1512460	1513005	-	546	6	2	11	3	719	781	555	562
KQ76_07390	CP009361.1	1513284	1513448	-	165	2	2	4	12	142	150	125	129
KQ76_07395	CP009361.1	1513653	1514573	-	921	173	106	222	152	482	624	252	394
KQ76_07405	CP009361.1	1514787	1515701	-	915	29	14	26	19	215	232	221	189
KQ76_07410	CP009361.1	1515759	1516664	-	906	10	7	21	15	295	208	166	180
KQ76_07415	CP009361.1	1516754	1516939	-	186	0	0	3	2	72	47	45	45
KQ76_07425	CP009361.1	1517188	1518171	-	984	18	10	27	12	840	839	371	359
KQ76_07430	CP009361.1	1518167	1519105	-	939	34	26	1457	640	550	564	766	721
KQ76_07440	CP009361.1	1519495	1520949	-	1455	8	6	15	21	237	213	196	210
KQ76_07445	CP009361.1	1520960	1521262	-	303	1	18	13	5	46	82	35	31
KQ76_07450	CP009361.1	1521388	1521762	-	375	11	26	13	42	53	45	146	148
KQ76_07455	CP009361.1	1521818	1522105	-	288	5	3	11	4	55	78	59	77
KQ76_07460	CP009361.1	1522152	1522304	-	153	7	4	18	4	35	29	37	45
KQ76_07465	CP009361.1	1522294	1526079	-	3786	20	17	1794	1881	811	720	684	659
KQ76_07470	CP009361.1	1526095	1527585	-	1491	8	7	24	21	342	326	135	116
KQ76_07475	CP009361.1	1527585	1532234	-	4650	26	34	49	66	710	683	708	762
KQ76_07480	CP009361.1	1532290	1532412	-	123	3	0	1	0	23	17	17	15
KQ76_07485	CP009361.1	1532472	1532918	-	447	5	3	10	13	53	57	85	84
KQ76_07490	CP009361.1	1532983	1533936	-	954	58	23	122	41	412	382	280	287
KQ76_07495	CP009361.1	1533937	1534317	-	381	3	1	6	1	33	39	22	23
KQ76_07500	CP009361.1	1534314	1534691	-	378	4	1	7	8	103	97	121	142
KQ76_07505	CP009361.1	1534691	1535026	-	336	3	5	4	2	33	30	25	34
KQ76_07510	CP009361.1	1535013	1535345	-	333	0	1	0	1	14	17	19	13
KQ76_07515	CP009361.1	1535354	1535512	-	159	2	2	1	0	9	12	9	9
KQ76_07520	CP009361.1	1535548	1536795	-	1248	14	12	59	28	316	330	211	210
KQ76_07525	CP009361.1	1536883	1537467	-	585	14	41	31	15	78	63	50	58
KQ76_07530	CP009361.1	1537460	1538710	-	1251	45	25	51	61	169	155	155	159
KQ76_07535	CP009361.1	1538716	1538955	-	240	3	19	20	27	60	73	60	52
KQ76_07540	CP009361.1	1538930	1540624	-	1695	30	19	78	35	595	532	263	248
KQ76_07545	CP009361.1	1540627	1541094	-	468	5	3	7	5	71	64	105	128
KQ76_07550	CP009361.1	1541224	1541577	-	354	11	27	21	23	128	166	121	120
KQ76_07555	CP009361.1	1541584	1542036	-	453	3	10	1	9	250	265	59	71
KQ76_07560	CP009361.1	1542151	1542585	-	435	2	5	9	4	243	240	236	235
KQ76_07565	CP009361.1	1542608	1542808	-	201	3	3	3	8	28	40	62	63
KQ76_07570	CP009361.1	1542808	1543458	-	651	128	175	248	485	893	916	415	412
KQ76_07580	CP009361.1	1543617	1543766	-	150	1	0	0	0	26	20	14	11
KQ76_07585	CP009361.1	1543769	1543969	-	201	2	2	2	6	172	168	60	53
KQ76_07590	CP009361.1	1543944	1544132	-	189	0	1	0	0	13	17	16	18
KQ76_07595	CP009361.1	1544129	1544374	-	246	2	5	12	2	108	112	28	35
KQ76_07600	CP009361.1	1544411	1544920	-	510	3	1	2	3	399	429	57	61
KQ76_07605	CP009361.1	1544913	1545161	-	249	1	1	13	1	81	75	69	71
KQ76_07610	CP009361.1	1545202	1545450	-	249	0	3	2	1	109	118	130	154
KQ76_07615	CP009361.1	1545451	1545810	-	360	2	4	3	5	256	234	63	51
KQ76_07620	CP009361.1	1545811	1545996	-	186	2	1	3	0	123	115	94	105
KQ76_07625	CP009361.1	1546001	1546405	-	405	8	19	12	16	72	71	101	110
KQ76_07630	CP009361.1	1546415	1546636	-	222	8	6	2	2	180	182	91	80
KQ76_07635	CP009361.1	1546649	1546807	-	159	0	1	1	4	93	108	14	10
[truncated: 1,259 more rows]
