# Supplementary material for: An improved bacterial single-cell RNA-seq reveals biofilm heterogeneity
Source: eLife. 2024 Dec 17;13:RP97543. doi: 10.7554/eLife.97543 (PMC11651652; doi:10.7554/eLife.97543)
Supplement: Supplementary file 4. [file elife-97543-supp4.xls]

## Sheet: Sheet1
	RiboD-PETRI	PETRI-seq	MicroSPLiT-seq	M3-Seq	BacDrop-seq	MATQ-DASH	smRandom-seq
Cost	low	low	low	high	high	high	high
Speciel instruments	Basic laboratory equipment	Basic laboratory equipment	Basic laboratory equipment	Leveraging 10X Genomics platform	Leveraging 10X Genomics platform	FACS	Leveraging 10X Genomics platform
Throughput(cells)	Tens of thousands	Tens of thousands	Hundreds of thousands	Tens of thousands	Tens of thousands	Hundreds	Hundreds of thousands
rRNA depletion method	Ribo-cDNA depletion by streptavidin magnetic beads after RNA probe hybridization in-tube	No depletion	Poly A Polymerase	DNA probe hybridization and RNase H digestion after converting the barcoded cDNA constructs into RNA by T7 RNA polymeras in-tube	RNase H digestion after DNA probe hybridization in-cells	DASH Cas9-mediated targeted rRNA depletion	CRISPR-based rRNA depletion technique
mRNA ratio(E.coli)	About 79%	About 5%	About 7%	About 65%	About 60% K. pneumoniae	About 30% （Salmonella) 3个细胞 75%	About 63%
Median mRNA UMIs per cell(E.coli)	462	227	235	100–211
Median mRNA transcripts per cell(E.coli)	362	103(operons)	138	75–151	About 90 (mean)	About 375	About 225
RT	In-cells	In-cells	In-cells	In-cells	In-cells and then in-tube	Single cell in tube	In-cells
2nd Strand cDNA Synthesis	No	After RT in-tube	No	After RT in-tube	After RT in-cells	After RT in-tube	After RT in-tube
Research Focus		Cancer Biology, Oncology Cancer Evolution Data Science Machine Learning Single Cell Genomics Tumor Heterogeneity	The identification of systematic design rules for the de novo construction of biological control circuits with DNA and RNA components.	Bacterial cell biology: fundamentals of cytoskeletal dynamics, polarity, and mitosis	host–pathogen interactions(Klebsiella pneumoniae, Pseudomonas aeruginosa, and Mycobacterium tuberculosis.)		Complex microbial community samples such as bacteria under antibiotic treatment.
