# Supplementary material for: An improved bacterial single-cell RNA-seq reveals biofilm heterogeneity
Source: eLife. 2024 Dec 17;13:RP97543. doi: 10.7554/eLife.97543 (PMC11651652; doi:10.7554/eLife.97543)
Supplement: Supplementary file 5. — The detailed information of RiboD-PETRI libraries. [file elife-97543-supp5.xls]

## Sheet: Sheet2
Species	Total Number of Reads	Total Number of Cells	The cell Counts in Matrix	Total UMI Counts in Matrix	Effective Reads Per Cell	Recovered Cells (with ≥15 UMIs)	Filtered Cells	Filtered Genes	Median UMI Counts
S. aureus (Figure 2-figure supplement 1A-F and Figure 2-figure supplement 3)	356852070	30000	28257	1621604	2372	9982	9386	2500	150
C. crescentus (Figure 2-figure supplement 1G-L and Figure 2-figure supplement 4)	1158946240	30000	16578	6130347	8790	13897	5728	3689	490
E. coli 3h (Figure 2, 3G, 4A, Figure 1-figure supplement 1C-F and Figure 2-figure supplement 2)	454830824	60000	30006	2137645	1508	30004	1464	4136	405
E. coli Biofilm-1 (Figure 3A-F, 3H , 4B, Figure 3-figure supplement 1 and Figure 3-figure supplement 2)	329712382	20000	20748	829802	1563	5244	1621	3598	283.5
E. coli Biofilm-2 (Figure 3A-F, 3H , 4B, Figure 3-figure supplement 1 and Figure 3-figure supplement 2)	574307222	40000	40365	1738914	2034	11344	3999	3948	239
Total Number of Reads: The number of reads obtained from sequencing, including the reads1 and reads2 files.​
Total Number of Cells: The total number of cells contained in the library.
The Cell Counts in Matrix: The total number of cells contained in the matrix after single-cell split and analysis to synthesize the matrix.
Total UMI Counts in Matrix: The total number of UMIs included in the matrix after single-cell split and analysis to synthesize the matrix.
Effective Reads Per Cell: Number of Effective Reads (for Matrix) per cell in the Matrix.
Recovered Cells (with ≥15 UMIs): The total number of cells with UMI > 15.
Filtered Cells: The number of cells remaining after filtering when analyzing the matrix composed of single-cell data using Seurat.
Filtered Genes: The number of genes remaining after filtering when analyzing the matrix composed of single-cell data using Seurat.
Median UMI Counts: The median of the UMI per cell among the remaining cells after filtering when analyzing the matrix composed of single-cell data using Seurat.
