# Supplementary material for: An improved bacterial single-cell RNA-seq reveals biofilm heterogeneity
Source: eLife. 2024 Dec 17;13:RP97543. doi: 10.7554/eLife.97543 (PMC11651652; doi:10.7554/eLife.97543)
Supplement: Supplementary file 6. — The detailed cost breakdown of RiboD-PETRI. [file elife-97543-supp6.xls]

## Sheet: Sheet1
	Items or reagents		cost/sample(￥)
	Cell processing	Lysozyme	0.005192
		RNase Inhibitor	31.5
		dNTPs	14.375
		Maxima H Minus Reverse Transcriptase	555.975
		PEG 8000	9.15
		proteinase K	2.256
		DNaseI	46.68
		T4 ligase	400
		primer	55.3438
	rRNA removal	TSO (100μM) and rRNA-tRNA probe	5
		Streptavidin magnetic beads	23.12
		probe primer	~0
		biotin primer	5
	library construction	VAHTS DNA Clean Beads	16
		KAPA HIFI hotStart ReadyMix PCR Kits	14.72
		VAHTS Universal DNA Library Prep Kit	112.5
	Sequencing	Sequencing costs	1250
	The total cost in RMB		cost/sample(￥)
	total (￥)		2541.62
	￥ convert to $		cost/sample($)
	total ($)		347.217
	Number of cells sequenced		Cost per cell
	20000		0.0173608
	30000		0.0115739
	40000		0.00868041
	50000		0.00694433
	60000		0.00578694
	70000		0.00496024
		Changes in the number of cells detected with increasing reads during sequencing
					Sequenced about 70,000 cells.
					$0.0049/celll
