# Supplementary material for: An improved bacterial single-cell RNA-seq reveals biofilm heterogeneity
Source: eLife. 2024 Dec 17;13:RP97543. doi: 10.7554/eLife.97543 (PMC11651652; doi:10.7554/eLife.97543)
Supplement: Supplementary file 10. — The result of bulk RNA-seq of exponential period E. coli sample in Figure 1E. [file elife-97543-supp10.xls]

## Sheet: Sheet1
ID	Chromosome	Start	End	Strand	Length	Reads
b0001	Chromosome	190	255	+	66	123
b0002	Chromosome	337	2799	+	2463	577
b0003	Chromosome	2801	3733	+	933	975
b0004	Chromosome	3734	5020	+	1287	1450
b0005	Chromosome	5234	5530	+	297	142
b0006	Chromosome	5683	6459	-	777	1004
b0007	Chromosome	6529	7959	-	1431	1406
b0008	Chromosome	8238	9191	+	954	23680
b0009	Chromosome	9306	9893	+	588	1112
b0010	Chromosome	9928	10494	-	567	293
b0013	Chromosome	11382	11786	-	405	27
b0014	Chromosome	12163	14079	+	1917	7074
b0015	Chromosome	14168	15298	+	1131	1095
b0016	Chromosome	15445	16557	+	1113	520
b0019	Chromosome	17489	18655	+	1167	791
b0020	Chromosome	18715	19620	+	906	584
b0021	Chromosome	19811	20314	-	504	94
b0023	Chromosome	20815	21078	-	264	1504
b0024	Chromosome	21181	21399	+	219	158
b0025	Chromosome	21407	22348	+	942	3057
b0026	Chromosome	22391	25207	+	2817	9640
b0027	Chromosome	25207	25701	+	495	547
b0028	Chromosome	25826	26275	+	450	565
b0029	Chromosome	26277	27227	+	951	921
b0030	Chromosome	27293	28207	+	915	12189
b0031	Chromosome	28374	29195	+	822	1774
b0032	Chromosome	29651	30799	+	1149	187
b0033	Chromosome	30817	34038	+	3222	524
b0034	Chromosome	34300	34695	+	396	1073
b0035	Chromosome	34781	35371	-	591	112
b0036	Chromosome	35377	36162	-	786	37
b0037	Chromosome	36271	37824	-	1554	238
b0038	Chromosome	37898	39115	-	1218	242
b0039	Chromosome	39244	40386	-	1143	349
b0040	Chromosome	40417	41931	-	1515	42
b0041	Chromosome	42403	43173	+	771	33
b0042	Chromosome	43188	44129	+	942	32
b0043	Chromosome	44180	45466	+	1287	33
b0044	Chromosome	45463	45750	+	288	9
b0045	Chromosome	45807	47138	+	1332	27
b0046	Chromosome	47246	47776	+	531	139
b0047	Chromosome	47769	49631	+	1863	397
b0048	Chromosome	49823	50302	+	480	486
b0049	Chromosome	50380	51222	-	843	1079
b0050	Chromosome	51229	51606	-	378	627
b0051	Chromosome	51609	52430	-	822	3290
b0052	Chromosome	52427	53416	-	990	1933
b0053	Chromosome	53416	54702	-	1287	5232
b0054	Chromosome	54755	57109	-	2355	10280
b0055	Chromosome	57364	58179	+	816	793
b0058	Chromosome	59687	60346	-	660	235
b0059	Chromosome	60358	63264	-	2907	972
b0060	Chromosome	63429	65780	-	2352	1258
b0061	Chromosome	65855	66550	-	696	294
b0062	Chromosome	66835	68337	-	1503	657
b0063	Chromosome	68348	70048	-	1701	284
b0064	Chromosome	70387	71265	+	879	728
b0065	Chromosome	71351	72115	+	765	437
b0066	Chromosome	72229	72927	-	699	132
b0067	Chromosome	72911	74521	-	1611	92
b0068	Chromosome	74497	75480	-	984	351
b0069	Chromosome	75644	77299	-	1656	799
b0070	Chromosome	77621	78799	+	1179	337
b0071	Chromosome	78848	79453	-	606	129
b0072	Chromosome	79464	80864	-	1401	188
b0073	Chromosome	80867	81958	-	1092	126
b0074	Chromosome	81958	83529	-	1572	213
b0075	Chromosome	83622	83708	-	87	3
b0076	Chromosome	84368	85312	+	945	51
b0077	Chromosome	85630	87354	+	1725	451
b0078	Chromosome	87357	87848	+	492	55
b0080	Chromosome	88028	89032	+	1005	5574
b0081	Chromosome	89634	90092	+	459	680
b0082	Chromosome	90094	91035	+	942	2873
b0083	Chromosome	91032	91397	+	366	512
b0084	Chromosome	91413	93179	+	1767	2370
b0085	Chromosome	93166	94653	+	1488	4960
b0086	Chromosome	94650	96008	+	1359	3582
b0087	Chromosome	96002	97084	+	1083	1648
b0088	Chromosome	97087	98403	+	1317	3201
b0089	Chromosome	98403	99647	+	1245	2048
b0090	Chromosome	99644	100711	+	1068	2226
b0091	Chromosome	100765	102240	+	1476	5191
b0092	Chromosome	102233	103153	+	921	3301
b0093	Chromosome	103155	103985	+	831	2414
b0094	Chromosome	103982	105244	+	1263	4772
b0095	Chromosome	105305	106456	+	1152	20792
b0096	Chromosome	106557	107474	+	918	15106
b0097	Chromosome	107705	108217	+	513	2791
b0098	Chromosome	108279	110984	+	2706	10592
b0099	Chromosome	111044	111433	+	390	85
b0101	Chromosome	111649	111846	-	198	339
b0102	Chromosome	111856	112599	-	744	946
b0103	Chromosome	112599	113219	-	621	723
b0104	Chromosome	113444	114487	+	1044	926
b0106	Chromosome	114522	115724	-	1203	111
b0107	Chromosome	115714	117099	-	1386	279
b0108	Chromosome	117109	117549	-	441	7
b0109	Chromosome	117752	118645	-	894	986
b0110	Chromosome	118733	119284	+	552	1852
b0111	Chromosome	119281	120135	+	855	927
b0112	Chromosome	120178	121551	-	1374	853
b0113	Chromosome	122092	122856	+	765	2238
b0114	Chromosome	123017	125680	+	2664	38680
b0115	Chromosome	125695	127587	+	1893	28619
b0116	Chromosome	127912	129336	+	1425	52651
b0117	Chromosome	129407	131260	-	1854	215
b0118	Chromosome	131615	134212	+	2598	36446
b0119	Chromosome	134388	134750	+	363	123
b0120	Chromosome	134788	135582	-	795	944
b0121	Chromosome	135598	136464	-	867	1402
b0122	Chromosome	136570	136917	-	348	749
b0123	Chromosome	137083	138633	+	1551	831
b0124	Chromosome	138835	141225	-	2391	696
b0125	Chromosome	141431	141967	+	537	2147
b0126	Chromosome	142008	142670	-	663	3096
b0127	Chromosome	142779	143705	+	927	1450
b0128	Chromosome	143702	144472	+	771	721
b0129	Chromosome	144577	145017	+	441	920
b0130	Chromosome	145081	146310	+	1230	716
b0131	Chromosome	146314	146694	-	381	1388
b0132	Chromosome	146968	147870	+	903	84
b0133	Chromosome	147944	148795	-	852	2161
b0134	Chromosome	148807	149601	-	795	2241
b0135	Chromosome	149715	150953	-	1239	26
b0139	Chromosome	152829	155426	-	2598	16
b0140	Chromosome	155461	156201	-	741	3
b0143	Chromosome	157729	159126	-	1398	2267
b0144	Chromosome	159186	160112	-	927	680
b0145	Chromosome	160149	160604	-	456	4217
b0146	Chromosome	160782	161486	-	705	7034
b0147	Chromosome	161501	162031	-	531	446
b0148	Chromosome	162105	164534	+	2430	1492
b0149	Chromosome	164730	167264	+	2535	2465
b0150	Chromosome	167484	169727	+	2244	634
b0151	Chromosome	169778	170575	+	798	153
b0152	Chromosome	170575	171465	+	891	132
b0153	Chromosome	171462	173444	+	1983	241
b0154	Chromosome	173602	174882	-	1281	2988
b0155	Chromosome	175107	176528	+	1422	1661
b0156	Chromosome	176610	176954	+	345	698
b0157	Chromosome	177001	177624	-	624	83
b0158	Chromosome	177662	178462	-	801	530
b0159	Chromosome	178455	179153	-	699	4436
b0160	Chromosome	179237	180754	+	1518	758
b0161	Chromosome	180884	182308	+	1425	1293
b0162	Chromosome	182463	183620	+	1158	4535
b0163	Chromosome	183709	184095	-	387	3660
b0164	Chromosome	184257	185069	-	813	167
b0166	Chromosome	185123	185947	-	825	7953
b0167	Chromosome	185978	188650	-	2673	940
b0168	Chromosome	188712	189506	-	795	2545
b0169	Chromosome	189874	190599	+	726	19132
b0170	Chromosome	190857	191708	+	852	6082
b0171	Chromosome	191855	192580	+	726	882
b0172	Chromosome	192872	193429	+	558	6379
b0173	Chromosome	193521	194717	+	1197	1798
b0174	Chromosome	194903	195664	+	762	3090
b0175	Chromosome	195677	196534	+	858	1040
b0176	Chromosome	196546	197898	+	1353	5553
b0177	Chromosome	197928	200360	+	2433	10353
b0178	Chromosome	200482	200967	+	486	4572
b0179	Chromosome	200971	201996	+	1026	7250
b0180	Chromosome	202101	202556	+	456	3057
b0181	Chromosome	202560	203348	+	789	2729
b0182	Chromosome	203348	204496	+	1149	1650
b0183	Chromosome	204493	205089	+	597	488
b0184	Chromosome	205126	208608	+	3483	3920
b0185	Chromosome	208621	209580	+	960	3226
b0186	Chromosome	209679	211820	+	2142	2413
b0187	Chromosome	211877	212266	+	390	595
b0188	Chromosome	212331	213629	+	1299	1121
b0189	Chromosome	213678	213932	-	255	400
b0190	Chromosome	214291	214836	+	546	1062
b0191	Chromosome	214833	215255	+	423	424
b0192	Chromosome	215269	215979	+	711	1493
b0193	Chromosome	216179	217003	-	825	161
b0194	Chromosome	217057	218775	-	1719	3672
b0195	Chromosome	218887	219594	-	708	343
b0196	Chromosome	219591	219995	-	405	699
b0197	Chromosome	220113	220928	-	816	1708
b0198	Chromosome	220968	221621	-	654	414
b0199	Chromosome	221614	222645	-	1032	614
b0200	Chromosome	222833	223408	+	576	2305
b0207	Chromosome	229167	229970	+	804	207
b0208	Chromosome	229967	230881	-	915	524
b0209	Chromosome	231122	231922	+	801	3556
b0210	Chromosome	231926	232549	+	624	379
b0211	Chromosome	232597	233955	-	1359	2648
b0212	Chromosome	234027	234782	-	756	1694
b0213	Chromosome	234816	235538	+	723	728
b0214	Chromosome	235535	236002	-	468	580
b0215	Chromosome	236067	236798	+	732	977
b0217	Chromosome	237335	238120	+	786	24
b0219	Chromosome	239419	240189	-	771	774
b0220	Chromosome	240343	240816	+	474	418
b0221	Chromosome	240859	243303	-	2445	222
b0222	Chromosome	243543	244121	+	579	2373
b0223	Chromosome	244327	245094	+	768	1523
b0224	Chromosome	245065	245805	-	741	1040
b0225	Chromosome	245961	246239	-	279	191
b0226	Chromosome	246242	246502	-	261	644
b0227	Chromosome	246712	247461	+	750	71
b0228	Chromosome	247637	248134	+	498	449
b0231	Chromosome	250898	251953	+	1056	329
b0232	Chromosome	252005	252298	+	294	54
b0233	Chromosome	252301	252699	+	399	27
b0237	Chromosome	254259	255716	-	1458	21563
b0238	Chromosome	255977	256435	+	459	1363
b0239	Chromosome	256527	257771	+	1245	1457
b0242	Chromosome	260388	261491	+	1104	3778
b0243	Chromosome	261503	262756	+	1254	2436
b0245	Chromosome	263328	263669	-	342	57
b0246	Chromosome	263690	264007	-	318	40
b0247	Chromosome	264256	264732	-	477	82
b0248	Chromosome	264748	265206	-	459	206
b0249	Chromosome	265304	265543	-	240	51
b0250	Chromosome	265620	266087	-	468	625
b0251	Chromosome	266110	266553	-	444	67
b0252	Chromosome	267184	268005	-	822	129
b0253	Chromosome	268097	268960	-	864	268
b0254	Chromosome	269289	270182	-	894	173
b0256	Chromosome	270603	271754	+	1152	659
b0259	Chromosome	274101	275117	-	1017	2116
b0260	Chromosome	275325	276728	+	1404	78
b0261	Chromosome	276715	277647	+	933	1678
b0262	Chromosome	277756	278802	-	1047	162
b0264	Chromosome	279178	279681	-	504	160
b0267	Chromosome	280829	281983	-	1155	18
b0268	Chromosome	282278	283186	+	909	374
b0269	Chromosome	283201	285168	+	1968	477
b0270	Chromosome	285395	286777	+	1383	90
b0271	Chromosome	286789	288399	+	1611	240
b0272	Chromosome	288404	289162	-	759	259
b0273	Chromosome	289301	290305	-	1005	231
b0274	Chromosome	290649	291152	-	504	183
b0277	Chromosome	292322	292948	-	627	55
b0278	Chromosome	293220	293918	-	699	16
b0279	Chromosome	293945	294799	-	855	10
b0280	Chromosome	295139	295579	-	441	601
b0281	Chromosome	295696	297096	-	1401	512
b0283	Chromosome	297770	298726	-	957	67
b0284	Chromosome	298736	300934	-	2199	148
b0285	Chromosome	300931	301887	-	957	115
b0286	Chromosome	301884	302573	-	690	73
b0287	Chromosome	302991	303605	+	615	679
b0289	Chromosome	304495	305205	-	711	147
b0290	Chromosome	305174	306817	-	1644	234
b0291	Chromosome	306807	309332	-	2526	214
b0292	Chromosome	309358	310026	-	669	26
b0293	Chromosome	310084	310671	-	588	122
b0298	Chromosome	315291	315590	+	300	100
b0299	Chromosome	315587	316453	+	867	777
b0301	Chromosome	317726	318319	-	594	7
b0304	Chromosome	318676	320001	-	1326	381
b0306	Chromosome	321608	322327	+	720	5401
b0307	Chromosome	322338	323765	+	1428	7304
b0308	Chromosome	323758	324453	+	696	2718
b0311	Chromosome	325577	327247	-	1671	174
b0312	Chromosome	327261	328733	-	1473	330
b0313	Chromosome	328747	329334	-	588	121
b0314	Chromosome	329463	331496	+	2034	180
b0315	Chromosome	332371	333459	+	1089	91
b0316	Chromosome	333501	334433	-	933	276
b0317	Chromosome	334525	335022	-	498	37
b0319	Chromosome	335925	336788	+	864	23
b0320	Chromosome	336778	338325	+	1548	67
b0321	Chromosome	338325	339743	+	1419	160
b0323	Chromosome	340165	341115	+	951	65
b0324	Chromosome	341125	342507	+	1383	457
b0325	Chromosome	342884	343933	+	1050	1651
b0327	Chromosome	345404	345649	+	246	18
b0328	Chromosome	345666	346337	-	672	913
b0329	Chromosome	346484	346759	+	276	3287
b0330	Chromosome	346857	348443	-	1587	68
b0331	Chromosome	348682	349572	+	891	37
b0333	Chromosome	350012	351181	+	1170	30
b0334	Chromosome	351215	352666	+	1452	38
b0335	Chromosome	352706	354592	+	1887	89
b0336	Chromosome	354922	356181	+	1260	140
b0337	Chromosome	356171	357454	+	1284	1016
b0338	Chromosome	357791	358690	-	900	151
b0339	Chromosome	358799	359458	+	660	46
b0340	Chromosome	359489	359959	+	471	57
b0341	Chromosome	359992	361146	+	1155	71
b0342	Chromosome	361249	361860	-	612	82
b0343	Chromosome	361926	363179	-	1254	215
b0344	Chromosome	363231	366305	-	3075	1158
b0345	Chromosome	366428	367510	-	1083	697
b0346	Chromosome	367587	368420	-	834	149
b0348	Chromosome	370277	371221	+	945	16
b0349	Chromosome	371239	372105	+	867	32
b0350	Chromosome	372115	372924	+	810	29
b0351	Chromosome	372921	373871	+	951	47
b0352	Chromosome	373868	374881	+	1014	54
b0353	Chromosome	375459	376670	+	1212	108
b0354	Chromosome	376772	377311	+	540	722
b0355	Chromosome	377535	378368	-	834	325
b0356	Chromosome	378462	379571	-	1110	899
b0357	Chromosome	379606	379881	-	276	211
b0360	Chromosome	381351	381716	+	366	249
b0361	Chromosome	381674	382579	+	906	354
b0363	Chromosome	382739	383935	-	1197	11
b0366	Chromosome	386207	386974	+	768	30
b0367	Chromosome	386971	387798	+	828	12
b0369	Chromosome	388753	389727	-	975	4158
b0372	Chromosome	391739	392605	-	867	732
b0373	Chromosome	392602	392901	-	300	62
b0375	Chromosome	394506	395129	+	624	9
b0376	Chromosome	395130	396287	-	1158	930
b0377	Chromosome	396639	397859	+	1221	398
b0378	Chromosome	397872	398966	+	1095	485
b0380	Chromosome	399593	399805	+	213	301
b0381	Chromosome	399829	400923	-	1095	2831
b0382	Chromosome	401386	401646	+	261	233
b0383	Chromosome	401747	403162	+	1416	443
b0384	Chromosome	403281	403601	+	321	363
b0385	Chromosome	403703	404818	+	1116	87
b0386	Chromosome	404835	405644	-	810	1324
b0387	Chromosome	405764	406222	+	459	676
b0388	Chromosome	406405	406929	+	525	905
b0389	Chromosome	406979	407170	+	192	329
b0390	Chromosome	407428	408105	+	678	178
b0391	Chromosome	408177	408461	+	285	1942
b0393	Chromosome	409108	410019	-	912	933
b0394	Chromosome	410144	411052	+	909	1774
b0396	Chromosome	411297	412481	-	1185	288
b0397	Chromosome	412607	415753	-	3147	1413
b0398	Chromosome	415750	416952	-	1203	780
b0399	Chromosome	417142	417831	+	690	358
b0400	Chromosome	417889	419184	+	1296	303
b0401	Chromosome	419591	420910	+	1320	1747
b0402	Chromosome	420986	422359	+	1374	1200
b0403	Chromosome	422518	424332	+	1815	762
b0404	Chromosome	424337	424918	-	582	208
b0405	Chromosome	425011	426081	+	1071	865
b0406	Chromosome	426137	427264	+	1128	1896
b0407	Chromosome	427287	427619	+	333	3118
b0408	Chromosome	427647	429494	+	1848	7449
b0409	Chromosome	429505	430476	+	972	2534
b0410	Chromosome	430605	430952	+	348	786
b0411	Chromosome	431129	432013	-	885	5682
b0413	Chromosome	433002	433451	+	450	740
b0414	Chromosome	433455	434558	+	1104	2123
b0415	Chromosome	434647	435117	+	471	2351
b0416	Chromosome	435137	435556	+	420	2209
b0417	Chromosome	435634	436611	+	978	936
b0418	Chromosome	436589	437107	+	519	1282
b0419	Chromosome	437161	438135	-	975	3930
b0420	Chromosome	438315	440177	-	1863	3438
b0421	Chromosome	440202	441101	-	900	2457
b0422	Chromosome	441101	441343	-	243	1679
b0423	Chromosome	441549	442997	+	1449	1268
b0424	Chromosome	443051	443641	-	591	899
b0425	Chromosome	443604	444515	-	912	1229
b0426	Chromosome	444683	445174	+	492	3291
b0427	Chromosome	445302	446666	-	1365	407
b0428	Chromosome	446815	447705	-	891	828
b0429	Chromosome	447717	448046	-	330	227
b0430	Chromosome	448046	448660	-	615	282
b0431	Chromosome	448650	450641	-	1992	1111
b0432	Chromosome	450663	451610	-	948	839
b0433	Chromosome	452070	453545	-	1476	764
b0434	Chromosome	453589	454167	-	579	1976
b0435	Chromosome	454472	454789	+	318	911
b0436	Chromosome	455133	456431	+	1299	9525
b0437	Chromosome	456677	457300	+	624	6129
b0438	Chromosome	457426	458700	+	1275	10711
b0439	Chromosome	458888	461242	+	2355	6927
b0440	Chromosome	461451	461723	+	273	5710
b0441	Chromosome	461915	463786	+	1872	7870
b0442	Chromosome	463937	464308	+	372	325
b0443	Chromosome	464402	464800	+	399	57
b0444	Chromosome	464852	465547	-	696	1259
b0445	Chromosome	465612	467312	-	1701	1252
b0446	Chromosome	467412	468230	+	819	592
b0447	Chromosome	468383	468841	+	459	219
b0448	Chromosome	468871	470643	+	1773	483
b0449	Chromosome	470636	472417	+	1782	319
b0451	Chromosome	472966	474252	+	1287	161
b0452	Chromosome	474301	475161	-	861	675
b0453	Chromosome	475379	475951	+	573	1765
b0454	Chromosome	475982	476371	-	390	457
b0456	Chromosome	476672	477025	+	354	53
b0457	Chromosome	477067	478617	-	1551	422
b0458	Chromosome	478781	479251	-	471	413
b0459	Chromosome	479367	479918	-	552	391
b0460	Chromosome	480090	480308	-	219	451
b0461	Chromosome	480334	480708	-	375	463
b0462	Chromosome	481254	484403	-	3150	5083
b0463	Chromosome	484426	485619	-	1194	3740
b0464	Chromosome	485761	486408	+	648	952
b0465	Chromosome	486536	489898	+	3363	1777
b0466	Chromosome	490110	490271	-	162	17
b0467	Chromosome	490285	490812	-	528	499
b0468	Chromosome	490882	491259	+	378	254
b0469	Chromosome	491412	491963	+	552	575
b0470	Chromosome	492092	494023	+	1932	3369
b0471	Chromosome	494076	494405	+	330	993
b0472	Chromosome	494405	495010	+	606	2208
b0473	Chromosome	495120	496994	+	1875	2351
b0474	Chromosome	497175	497819	+	645	4383
b0475	Chromosome	498055	499017	+	963	700
b0476	Chromosome	499014	499973	-	960	1209
b0477	Chromosome	500125	501429	+	1305	1327
b0478	Chromosome	501562	503238	-	1677	1405
b0479	Chromosome	503476	504696	-	1221	585
b0480	Chromosome	504914	506566	+	1653	3484
b0481	Chromosome	506603	507082	-	480	420
b0482	Chromosome	507286	508080	-	795	718
b0483	Chromosome	508218	508559	+	342	250
b0484	Chromosome	508875	511379	-	2505	3587
b0485	Chromosome	511641	512573	+	933	1142
b0486	Chromosome	512576	513868	+	1293	453
b0487	Chromosome	513993	514400	+	408	597
b0488	Chromosome	514401	514859	-	459	361
b0489	Chromosome	514856	515773	-	918	1285
b0490	Chromosome	515919	516596	+	678	185
b0491	Chromosome	516583	517362	+	780	348
b0492	Chromosome	517425	518279	-	855	2596
b0493	Chromosome	518340	519149	-	810	1198
b0494	Chromosome	519139	519765	-	627	847
b0495	Chromosome	519733	520419	+	687	318
b0496	Chromosome	520416	522830	+	2415	558
b0497	Chromosome	523261	527541	+	4281	559
b0503	Chromosome	530132	531226	-	1095	794
b0504	Chromosome	531295	532221	-	927	88
b0505	Chromosome	532451	532933	+	483	123
b0506	Chromosome	533011	533826	+	816	2725
b0507	Chromosome	533916	535697	+	1782	53
b0508	Chromosome	535710	536486	+	777	3
b0509	Chromosome	536586	537464	+	879	45
b0511	Chromosome	537633	539087	+	1455	8
b0512	Chromosome	539147	540508	+	1362	140
b0513	Chromosome	540565	541866	+	1302	43
b0514	Chromosome	541888	543033	+	1146	87
b0515	Chromosome	543261	544046	-	786	299
b0516	Chromosome	544057	545292	-	1236	250
b0517	Chromosome	545314	546363	-	1050	73
b0520	Chromosome	549627	550442	+	816	48
b0521	Chromosome	550439	551332	+	894	44
b0522	Chromosome	551527	552594	-	1068	336
b0523	Chromosome	552591	553100	-	510	217
b0524	Chromosome	553218	553940	-	723	671
b0525	Chromosome	553943	554437	-	495	5179
b0526	Chromosome	554611	555996	+	1386	1692
b0528	Chromosome	556661	556873	-	213	75
b0529	Chromosome	556875	557741	-	867	1978
b0532	Chromosome	559697	562300	+	2604	50
b0534	Chromosome	563330	563845	+	516	12
b0537	Chromosome	564815	565978	-	1164	569
b0540	Chromosome	566842	567141	+	300	96
b0541	Chromosome	567138	568004	+	867	699
b0543	Chromosome	568315	568647	+	333	147
b0544	Chromosome	568902	570428	+	1527	10
b0545	Chromosome	570893	571444	+	552	64
b0546	Chromosome	571454	572251	+	798	138
b0547	Chromosome	572466	572921	+	456	2
b0551	Chromosome	573956	574339	+	384	6
b0552	Chromosome	574737	575753	-	1017	2808
b0557	Chromosome	578600	578893	-	294	51
b0559	Chromosome	579880	580086	+	207	359
b0564	Chromosome	583681	584430	+	750	22
b0565	Chromosome	584680	585633	-	954	2368
b0566	Chromosome	586147	586908	-	762	49
b0567	Chromosome	587091	587981	-	891	92
b0568	Chromosome	587982	590954	-	2973	670
b0569	Chromosome	590941	593178	-	2238	371
b0570	Chromosome	593328	594770	-	1443	168
b0571	Chromosome	594760	595443	-	684	245
b0572	Chromosome	595600	596973	+	1374	22
b0573	Chromosome	597131	597463	+	333	19
b0574	Chromosome	597479	598702	+	1224	31
b0575	Chromosome	598714	601857	+	3144	172
b0576	Chromosome	601959	603335	+	1377	269
b0577	Chromosome	603416	604663	-	1248	911
b0578	Chromosome	604771	605424	-	654	1682
b0579	Chromosome	605518	605886	-	369	169
b0580	Chromosome	605951	606199	-	249	42
b0581	Chromosome	606265	607383	-	1119	783
b0582	Chromosome	608065	609177	+	1113	380
b0584	Chromosome	610254	612494	-	2241	153
b0585	Chromosome	612737	613939	+	1203	17
b0586	Chromosome	614157	618038	+	3882	238
b0587	Chromosome	618254	619387	+	1134	5
b0588	Chromosome	619384	620199	-	816	3
b0589	Chromosome	620196	621188	-	993	59
b0590	Chromosome	621185	622189	-	1005	34
b0591	Chromosome	622300	623550	+	1251	14
b0592	Chromosome	623554	624510	-	957	53
b0593	Chromosome	624885	626060	+	1176	8
b0594	Chromosome	626070	627680	+	1611	44
b0596	Chromosome	628551	629297	+	747	132
b0597	Chromosome	629300	629713	+	414	19
b0598	Chromosome	629894	631999	+	2106	2411
b0599	Chromosome	632389	633477	-	1089	289
b0600	Chromosome	633586	634746	+	1161	158
b0601	Chromosome	634747	635376	-	630	106
b0602	Chromosome	635349	636569	-	1221	42
b0604	Chromosome	637827	638573	-	747	514
b0605	Chromosome	638945	639508	+	564	42364
b0606	Chromosome	639753	641318	+	1566	5522
b0607	Chromosome	641439	641867	-	429	2726
b0608	Chromosome	642088	643326	+	1239	196
b0610	Chromosome	643557	643967	-	411	995
b0611	Chromosome	644197	645003	-	807	1663
b0612	Chromosome	645117	646580	-	1464	75
b0613	Chromosome	646631	647509	-	879	19
b0615	Chromosome	648039	649571	-	1533	183
b0616	Chromosome	649582	650490	-	909	157
b0618	Chromosome	650798	651856	-	1059	71
b0619	Chromosome	652235	653893	+	1659	335
b0620	Chromosome	653862	654542	+	681	1947
b0621	Chromosome	654583	655968	-	1386	14214
b0622	Chromosome	656557	657117	+	561	192
b0623	Chromosome	657292	657501	+	210	10030
b0624	Chromosome	657555	657938	-	384	258
b0627	Chromosome	658947	659150	+	204	407
b0628	Chromosome	659251	660216	-	966	4178
b0629	Chromosome	660425	661378	-	954	73
b0630	Chromosome	661637	662278	-	642	584
b0631	Chromosome	662379	662642	-	264	462
b0632	Chromosome	662752	663963	-	1212	2172
b0633	Chromosome	664102	665190	-	1089	2140
b0634	Chromosome	665201	666313	-	1113	562
b0635	Chromosome	666316	668217	-	1902	1251
b0636	Chromosome	668248	668715	-	468	549
b0637	Chromosome	668719	669036	-	318	797
b0638	Chromosome	669296	669907	-	612	194
b0639	Chromosome	669931	670572	-	642	674
b0640	Chromosome	670574	671605	-	1032	1018
b0641	Chromosome	671605	672186	-	582	1864
b0642	Chromosome	672201	674783	-	2583	10055
b0643	Chromosome	675018	675500	+	483	4922
b0644	Chromosome	675570	676547	-	978	487
b0646	Chromosome	677415	678842	+	1428	15
b0648	Chromosome	679508	680215	+	708	3
b0649	Chromosome	680212	681663	+	1452	90
b0650	Chromosome	681723	683393	-	1671	309
b0651	Chromosome	683477	684412	-	936	7028
b0652	Chromosome	684530	685255	-	726	245
b0653	Chromosome	685255	685929	-	675	162
b0654	Chromosome	685929	686669	-	741	234
b0655	Chromosome	686839	687747	-	909	1250
b0656	Chromosome	687997	689013	-	1017	2259
b0657	Chromosome	689343	690881	-	1539	1555
b0658	Chromosome	690906	691784	-	879	3678
b0659	Chromosome	691874	692341	-	468	1014
b0660	Chromosome	692338	693378	-	1041	3378
b0661	Chromosome	693531	694955	-	1425	1002
b0662	Chromosome	695101	696276	+	1176	2624
b0674	Chromosome	697513	699177	-	1665	1860
b0675	Chromosome	699574	700326	-	753	1680
b0676	Chromosome	700374	701594	-	1221	3112
b0677	Chromosome	701603	702751	-	1149	3248
b0678	Chromosome	702811	703611	-	801	3873
b0679	Chromosome	703944	705890	+	1947	12624
b0680	Chromosome	706093	707757	+	1665	5472
b0681	Chromosome	708334	709740	+	1407	616
b0683	Chromosome	710200	710646	-	447	5645
b0684	Chromosome	710935	711465	-	531	3957
b0685	Chromosome	711605	711898	-	294	402
b0686	Chromosome	712038	712802	-	765	694
b0687	Chromosome	712987	713532	+	546	5309
b0688	Chromosome	713558	715198	+	1641	10055
b0692	Chromosome	716946	718265	-	1320	121
b0693	Chromosome	718262	720460	-	2199	73
b0694	Chromosome	721056	721733	-	678	135
b0695	Chromosome	721730	724414	-	2685	721
b0696	Chromosome	724407	724979	-	573	69
b0697	Chromosome	724988	727036	-	2049	145
b0698	Chromosome	727059	728732	-	1674	29
b0699	Chromosome	729134	729340	+	207	173
b0700	Chromosome	729583	733776	+	4194	721
b0704	Chromosome	735650	736219	+	570	14
b0706	Chromosome	738092	738853	+	762	5
b0707	Chromosome	739001	739510	+	510	1192
b0708	Chromosome	739507	740925	+	1419	1594
b0709	Chromosome	741075	742556	-	1482	379
b0710	Chromosome	742827	743570	+	744	1546
b0711	Chromosome	743593	744249	+	657	1177
b0712	Chromosome	744243	745175	+	933	1687
b0713	Chromosome	745165	745899	+	735	750
b0714	Chromosome	745935	746726	+	792	551
b0715	Chromosome	746723	747769	-	1047	768
b0716	Chromosome	747921	748982	-	1062	80
b0717	Chromosome	748979	749707	-	729	12
b0718	Chromosome	749722	752169	-	2448	36
b0720	Chromosome	753185	754468	-	1284	19922
b0721	Chromosome	755177	755566	+	390	663
b0722	Chromosome	755560	755907	+	348	275
b0723	Chromosome	755907	757673	+	1767	3035
b0724	Chromosome	757689	758405	+	717	1776
b0726	Chromosome	758706	761507	+	2802	8411
b0727	Chromosome	761522	762739	+	1218	10959
b0728	Chromosome	763014	764180	+	1167	10001
b0729	Chromosome	764180	765049	+	870	8923
b0730	Chromosome	765153	765875	-	723	293
b0731	Chromosome	765984	767960	+	1977	36
b0732	Chromosome	767978	770611	+	2634	557
b0733	Chromosome	771458	773026	+	1569	35156
b0734	Chromosome	773042	774181	+	1140	30952
b0735	Chromosome	774309	774602	+	294	921
b0736	Chromosome	774752	775156	+	405	359
b0737	Chromosome	775153	775845	+	693	886
b0738	Chromosome	775849	776277	+	429	394
b0739	Chromosome	776342	777607	+	1266	691
b0740	Chromosome	777740	779032	+	1293	7922
b0741	Chromosome	779067	779588	+	522	12105
b0742	Chromosome	779598	780389	+	792	3664
b0750	Chromosome	782085	783128	+	1044	373
b0751	Chromosome	783166	783885	+	720	413
b0752	Chromosome	783882	784823	-	942	581
b0754	Chromosome	785633	786685	+	1053	5086
b0755	Chromosome	786843	787595	-	753	6680
b0756	Chromosome	787797	788837	-	1041	5843
b0757	Chromosome	788831	789979	-	1149	4740
b0758	Chromosome	789983	791029	-	1047	3265
b0759	Chromosome	791039	792055	-	1017	5264
b0760	Chromosome	792316	793788	-	1473	650
b0761	Chromosome	793856	794644	-	789	1191
b0762	Chromosome	794773	794922	+	150	65
b0763	Chromosome	795089	795862	+	774	634
b0764	Chromosome	795862	796551	+	690	199
b0765	Chromosome	796554	797612	+	1059	411
b0766	Chromosome	797613	798431	-	819	530
b0767	Chromosome	798586	799581	+	996	6657
b0768	Chromosome	799622	800575	-	954	74
b0770	Chromosome	801887	803320	+	1434	16
b0771	Chromosome	803503	805764	+	2262	152
b0772	Chromosome	805998	807281	-	1284	1040
b0773	Chromosome	807433	807909	-	477	1045
b0774	Chromosome	807968	809257	-	1290	106
b0775	Chromosome	809344	810384	+	1041	68
b0776	Chromosome	810381	811535	+	1155	42
b0777	Chromosome	811522	812277	+	756	35
b0778	Chromosome	812270	812947	+	678	18
b0779	Chromosome	813526	815547	+	2022	2387
b0780	Chromosome	815739	816647	-	909	843
b0781	Chromosome	817044	818033	+	990	2011
b0782	Chromosome	818055	818567	+	513	351
b0783	Chromosome	818570	819055	+	486	183
b0784	Chromosome	819048	819293	+	246	57
b0785	Chromosome	819295	819747	+	453	208
b0786	Chromosome	819884	820588	+	705	2984
b0789	Chromosome	822498	823739	-	1242	295
b0790	Chromosome	823736	824497	-	762	283
b0791	Chromosome	824630	825040	+	411	797
b0792	Chromosome	825002	826108	-	1107	687
b0793	Chromosome	826119	827252	-	1134	784
b0794	Chromosome	827245	828981	-	1737	3061
b0795	Chromosome	828974	829972	-	999	3085
b0796	Chromosome	829972	830643	-	672	753
b0797	Chromosome	830872	832236	+	1365	1858
b0798	Chromosome	832468	832950	-	483	1064
b0799	Chromosome	833070	835220	+	2151	1557
b0800	Chromosome	835248	836210	+	963	2342
b0801	Chromosome	836351	837436	+	1086	1161
b0802	Chromosome	837665	837925	-	261	264
b0803	Chromosome	838190	838456	-	267	97
b0804	Chromosome	838530	839207	-	678	120
b0805	Chromosome	839249	841531	-	2283	180
b0806	Chromosome	841796	842056	-	261	388
b0807	Chromosome	842332	843258	+	927	495
b0808	Chromosome	843255	845480	-	2226	487
b0809	Chromosome	845741	846463	-	723	453
b0810	Chromosome	846460	847119	-	660	461
b0811	Chromosome	847258	848004	-	747	2458
b0812	Chromosome	848408	848911	-	504	26430
b0813	Chromosome	849210	850097	-	888	184
b0814	Chromosome	850450	850965	+	516	13022
b0815	Chromosome	851014	852597	-	1584	183
b0817	Chromosome	853183	853650	+	468	231
b0818	Chromosome	853647	854765	+	1119	288
b0819	Chromosome	854824	855744	-	921	1804
b0820	Chromosome	855963	857555	+	1593	1986
b0821	Chromosome	857796	859061	-	1266	123
b0822	Chromosome	859213	860028	-	816	367
b0823	Chromosome	860174	862606	-	2433	903
b0824	Chromosome	862612	863511	-	900	105
b0825	Chromosome	863642	864304	+	663	532
b0826	Chromosome	864380	865129	-	750	798
b0827	Chromosome	865129	866364	-	1236	2681
b0828	Chromosome	866568	867533	+	966	1478
b0829	Chromosome	867520	869391	+	1872	1540
b0830	Chromosome	869411	870949	+	1539	1047
b0831	Chromosome	870967	871887	+	921	427
b0832	Chromosome	871890	872801	+	912	322
b0833	Chromosome	872979	875327	+	2349	73
b0834	Chromosome	875335	876663	+	1329	14
b0835	Chromosome	876710	878035	-	1326	643
b0836	Chromosome	878248	878631	+	384	3994
b0837	Chromosome	878742	879857	+	1116	414
b0838	Chromosome	879854	880480	-	627	1677
b0839	Chromosome	880727	881929	+	1203	2571
b0840	Chromosome	881976	882734	-	759	942
b0841	Chromosome	882792	883388	-	597	212
b0842	Chromosome	883673	884905	+	1233	206
b0843	Chromosome	884946	885230	-	285	52
b0844	Chromosome	885316	886131	-	816	239
b0845	Chromosome	886131	887339	-	1209	172
b0846	Chromosome	887423	887959	+	537	179
b0847	Chromosome	888134	889819	-	1686	1458
b0848	Chromosome	890089	890466	+	378	393
b0849	Chromosome	890496	890753	-	258	10
b0850	Chromosome	890913	891200	+	288	513
b0851	Chromosome	891184	891906	+	723	1280
b0852	Chromosome	891967	892869	+	903	764
b0853	Chromosome	892957	893433	+	477	2979
b0854	Chromosome	893784	894896	+	1113	74
b0856	Chromosome	896134	897087	+	954	15
b0857	Chromosome	897084	897929	+	846	33
b0858	Chromosome	897989	898477	+	489	70
b0859	Chromosome	898518	899645	+	1128	272
b0860	Chromosome	899844	900575	-	732	281
b0861	Chromosome	900866	901534	-	669	1481
b0862	Chromosome	901534	902250	-	717	859
b0863	Chromosome	902257	902988	-	732	5665
b0864	Chromosome	903006	903734	-	729	2511
b0865	Chromosome	903952	904467	-	516	4359
b0866	Chromosome	904593	904916	+	324	1240
b0867	Chromosome	904913	905743	+	831	1818
b0868	Chromosome	905740	906753	-	1014	1124
b0869	Chromosome	906852	908282	-	1431	1346
b0870	Chromosome	908293	909294	-	1002	2023
b0871	Chromosome	909331	911049	-	1719	4511
b0872	Chromosome	911182	912150	-	969	800
b0873	Chromosome	912162	913814	-	1653	699
b0874	Chromosome	913958	914857	-	900	117
b0875	Chromosome	915352	916047	-	696	93
b0876	Chromosome	916473	918131	+	1659	1587
b0877	Chromosome	918128	919120	-	993	2983
b0878	Chromosome	919235	920350	+	1116	1338
b0879	Chromosome	920347	922293	+	1947	1142
b0880	Chromosome	922366	922590	-	225	4003
b0881	Chromosome	922913	923233	+	321	1149
b0882	Chromosome	923264	925540	+	2277	24730
b0884	Chromosome	926225	926443	-	219	1971
b0885	Chromosome	926728	927432	-	705	240
b0886	Chromosome	927474	929195	-	1722	1083
b0887	Chromosome	929196	930962	-	1767	1322
b0888	Chromosome	931085	932050	-	966	1774
b0889	Chromosome	932595	933089	+	495	2536
b0890	Chromosome	933224	937213	+	3990	5862
b0891	Chromosome	937372	937983	+	612	2109
b0892	Chromosome	937994	939337	+	1344	1158
b0893	Chromosome	939428	940720	+	1293	20456
b0894	Chromosome	940959	943403	+	2445	47243
b0895	Chromosome	943414	944031	+	618	8150
b0896	Chromosome	944033	944896	+	864	6925
b0897	Chromosome	944931	945557	-	627	1460
b0898	Chromosome	945871	947019	+	1149	156
b0899	Chromosome	947229	948659	+	1431	150
b0900	Chromosome	948660	949568	-	909	55
b0901	Chromosome	949668	950258	+	591	26
b0902	Chromosome	950340	951080	-	741	1904
b0903	Chromosome	951272	953554	-	2283	181345
b0904	Chromosome	953609	954466	-	858	12148
b0905	Chromosome	954872	956632	-	1761	680
b0906	Chromosome	956762	957454	+	693	342
b0907	Chromosome	957653	958741	+	1089	3442
b0908	Chromosome	958812	960095	+	1284	936
b0909	Chromosome	960264	961028	+	765	74
b0910	Chromosome	961201	961884	+	684	2184
b0911	Chromosome	961995	963668	+	1674	28480
b0912	Chromosome	963828	964112	+	285	2280
b0913	Chromosome	964320	966584	+	2265	266
b0914	Chromosome	966621	968369	+	1749	1938
b0915	Chromosome	968366	969352	+	987	332
b0916	Chromosome	969389	970621	+	1233	189
b0917	Chromosome	970673	970855	+	183	220
b0918	Chromosome	970852	971598	+	747	1841
b0919	Chromosome	971752	972645	+	894	8333
b0920	Chromosome	972622	973401	-	780	372
b0921	Chromosome	973537	974322	+	786	1317
b0922	Chromosome	974319	975641	+	1323	1709
b0923	Chromosome	975622	976326	+	705	1460
b0924	Chromosome	976326	980786	+	4461	6175
b0925	Chromosome	981047	982894	+	1848	3749
b0926	Chromosome	983075	983623	+	549	3619
b0927	Chromosome	983650	984297	+	648	3194
b0928	Chromosome	984519	985709	-	1191	9356
b0929	Chromosome	985894	986982	-	1089	35132
b0930	Chromosome	987585	988985	-	1401	4744
b0931	Chromosome	989154	990356	-	1203	1514
b0932	Chromosome	990622	993234	+	2613	10904
b0933	Chromosome	993277	994044	-	768	64
b0934	Chromosome	994041	994832	-	792	27
b0935	Chromosome	994843	995988	-	1146	35
b0936	Chromosome	995985	996944	-	960	33
b0937	Chromosome	996937	997512	-	576	27
b0938	Chromosome	997868	998407	+	540	33
b0940	Chromosome	999216	1001816	+	2601	84
b0941	Chromosome	1001807	1002877	+	1071	129
b0943	Chromosome	1003439	1003954	+	516	41
b0944	Chromosome	1003947	1004657	+	711	135
b0945	Chromosome	1004768	1005778	+	1011	420
b0946	Chromosome	1005952	1006494	+	543	977
b0947	Chromosome	1006491	1007600	-	1110	1286
b0948	Chromosome	1007844	1009952	+	2109	1269
b0949	Chromosome	1009964	1011871	+	1908	1091
b0950	Chromosome	1012001	1013254	+	1254	340
b0951	Chromosome	1013259	1014899	+	1641	586
b0952	Chromosome	1014896	1015459	+	564	304
b0953	Chromosome	1015715	1015882	+	168	3632
b0954	Chromosome	1015952	1016470	-	519	4470
b0955	Chromosome	1016539	1018299	-	1761	2914
b0956	Chromosome	1018485	1018937	+	453	515
b0957	Chromosome	1019013	1020053	-	1041	219157
b0958	Chromosome	1020410	1020919	-	510	784
b0959	Chromosome	1021138	1021767	+	630	388
b0960	Chromosome	1021730	1023883	-	2154	634
b0961	Chromosome	1023902	1024348	-	447	134
b0962	Chromosome	1024471	1026525	+	2055	2042
b0963	Chromosome	1026557	1027015	-	459	5349
b0964	Chromosome	1027111	1027773	-	663	141
b0965	Chromosome	1027946	1028359	+	414	769
b0966	Chromosome	1028404	1028721	-	318	1025
b0967	Chromosome	1028779	1029969	-	1191	615
b0968	Chromosome	1030064	1030342	+	279	94
b0969	Chromosome	1030339	1030668	-	330	250
b0970	Chromosome	1030759	1031418	-	660	7985
b0972	Chromosome	1032139	1033257	+	1119	445
b0973	Chromosome	1033254	1035047	+	1794	504
b0974	Chromosome	1035066	1035773	+	708	138
b0975	Chromosome	1035770	1036357	+	588	128
b0977	Chromosome	1036749	1037606	+	858	117
b0978	Chromosome	1037740	1039284	+	1545	194
b0979	Chromosome	1039296	1040432	+	1137	91
b0980	Chromosome	1040617	1041915	+	1299	286
b0981	Chromosome	1042030	1044210	-	2181	463
b0983	Chromosome	1044664	1045803	-	1140	57
b0984	Chromosome	1045849	1047945	-	2097	94
b0986	Chromosome	1048688	1049332	-	645	16
b0987	Chromosome	1049439	1049744	-	306	70
b0988	Chromosome	1050027	1050530	+	504	1408
b0991	Chromosome	1051847	1052077	+	231	4
b0992	Chromosome	1052289	1053362	-	1074	711
b0993	Chromosome	1053434	1056178	-	2745	503
b0994	Chromosome	1056261	1057289	+	1029	434
b0995	Chromosome	1057262	1057954	-	693	180
b0996	Chromosome	1058084	1059256	+	1173	52
b0997	Chromosome	1059256	1061802	+	2547	155
b0999	Chromosome	1062550	1062855	-	306	344
b1000	Chromosome	1062855	1063775	-	921	3377
b1002	Chromosome	1065585	1066826	+	1242	29216
b1003	Chromosome	1066864	1067091	-	228	2225
b1004	Chromosome	1067112	1067708	-	597	22209
b1006	Chromosome	1068511	1069839	-	1329	156
b1008	Chromosome	1070365	1070955	-	591	28
b1009	Chromosome	1070965	1071765	-	801	18
b1012	Chromosome	1072863	1074011	-	1149	21
b1013	Chromosome	1074242	1074880	+	639	316
b1014	Chromosome	1074920	1078882	-	3963	339
b1015	Chromosome	1079305	1080813	+	1509	225
b1018	Chromosome	1082243	1083370	+	1128	40
b1019	Chromosome	1083376	1084647	+	1272	72
b1020	Chromosome	1084992	1086056	+	1065	23
b1022	Chromosome	1086521	1087846	-	1326	51
b1023	Chromosome	1087839	1089857	-	2019	76
b1024	Chromosome	1089866	1092289	-	2424	559
b1025	Chromosome	1092876	1094234	+	1359	152
b1026	Chromosome	1094275	1095141	-	867	698
b1027	Chromosome	1095138	1095437	-	300	97
b1033	Chromosome	1097886	1098824	+	939	1705
b1034	Chromosome	1098879	1099616	+	738	1893
b1035	Chromosome	1099640	1100194	+	555	1299
b1036	Chromosome	1100296	1100787	+	492	402
b1037	Chromosome	1100851	1101684	-	834	81
b1041	Chromosome	1103951	1104406	+	456	7
b1042	Chromosome	1104447	1104902	+	456	48
b1045	Chromosome	1105820	1106353	+	534	945
b1046	Chromosome	1106355	1107776	+	1422	898
b1048	Chromosome	1109335	1110870	+	1536	3562
b1049	Chromosome	1110863	1113406	+	2544	3524
b1050	Chromosome	1113579	1113806	+	228	547
b1051	Chromosome	1113807	1114181	-	375	339
b1053	Chromosome	1114264	1115490	-	1227	725
b1054	Chromosome	1115662	1116582	-	921	1272
b1055	Chromosome	1116807	1117859	+	1053	257
b1056	Chromosome	1117901	1118476	-	576	82
b1057	Chromosome	1118480	1119046	-	567	15
b1058	Chromosome	1119307	1119447	-	141	4
b1059	Chromosome	1119468	1120586	-	1119	1409
b1060	Chromosome	1120701	1120955	-	255	2299
b1061	Chromosome	1121242	1121487	-	246	144
b1062	Chromosome	1121561	1122607	-	1047	769
b1063	Chromosome	1122713	1123273	-	561	1068
b1064	Chromosome	1123407	1124054	-	648	5857
b1065	Chromosome	1124118	1125326	-	1209	421
b1066	Chromosome	1125562	1126146	+	585	1699
b1067	Chromosome	1126157	1126804	+	648	1182
b1068	Chromosome	1126806	1127729	+	924	1196
b1069	Chromosome	1127839	1129374	+	1536	341
b1070	Chromosome	1129414	1129830	-	417	72
b1071	Chromosome	1129835	1130128	-	294	123
b1072	Chromosome	1130204	1130863	-	660	443
b1073	Chromosome	1131018	1131434	+	417	691
b1074	Chromosome	1131438	1131842	+	405	451
b1075	Chromosome	1131854	1132549	+	696	940
b1076	Chromosome	1132574	1133782	+	1209	2098
b1077	Chromosome	1133802	1134557	+	756	828
b1078	Chromosome	1134729	1135511	+	783	1572
b1079	Chromosome	1135564	1136262	+	699	377
b1080	Chromosome	1136274	1137371	+	1098	551
b1081	Chromosome	1137371	1138312	+	942	267
b1082	Chromosome	1138378	1140021	+	1644	517
b1083	Chromosome	1140033	1140986	+	954	261
b1084	Chromosome	1141182	1144367	-	3186	21985
b1085	Chromosome	1144502	1144822	+	321	2576
b1086	Chromosome	1144940	1145899	+	960	800
b1087	Chromosome	1146011	1146595	-	585	752
b1088	Chromosome	1146794	1147315	+	522	9928
b1089	Chromosome	1147367	1147540	+	174	3459
b1090	Chromosome	1147621	1148691	+	1071	3294
b1091	Chromosome	1148759	1149712	+	954	3607
b1092	Chromosome	1149728	1150657	+	930	5035
b1093	Chromosome	1150670	1151404	+	735	19732
b1094	Chromosome	1151615	1151851	+	237	18545
b1095	Chromosome	1151939	1153180	+	1242	10732
b1096	Chromosome	1153300	1154109	+	810	530
b1097	Chromosome	1154112	1155134	+	1023	454
b1098	Chromosome	1155124	1155765	+	642	796
b1099	Chromosome	1155762	1156766	+	1005	801
b1100	Chromosome	1156777	1157574	+	798	1018
b1101	Chromosome	1157869	1159302	+	1434	16406
b1102	Chromosome	1159362	1161551	-	2190	240
b1103	Chromosome	1161885	1162244	+	360	1996
b1104	Chromosome	1162247	1162624	+	378	1546
b1105	Chromosome	1162638	1163279	+	642	2766
b1106	Chromosome	1163260	1164084	+	825	1049
b1107	Chromosome	1164095	1165120	+	1026	1969
b1108	Chromosome	1165143	1165685	+	543	8607
b1109	Chromosome	1166085	1167389	+	1305	2510
b1110	Chromosome	1167599	1168138	+	540	111
b1111	Chromosome	1168200	1168832	-	633	518
b1112	Chromosome	1169073	1169330	+	258	46
b1113	Chromosome	1169412	1170374	-	963	363
b1114	Chromosome	1170518	1173964	-	3447	3304
b1115	Chromosome	1174092	1175165	-	1074	72
b1116	Chromosome	1175427	1176626	+	1200	1952
b1117	Chromosome	1176619	1177320	+	702	701
b1118	Chromosome	1177320	1178564	+	1245	1594
b1119	Chromosome	1178593	1179504	+	912	2170
b1120	Chromosome	1179631	1180359	+	729	1213
b1123	Chromosome	1181783	1182829	-	1047	1020
b1124	Chromosome	1182826	1183620	-	795	199
b1125	Chromosome	1183617	1184444	-	828	193
b1126	Chromosome	1184458	1185594	-	1137	1070
b1127	Chromosome	1185844	1187070	+	1227	10450
b1128	Chromosome	1187119	1188240	-	1122	3172
b1129	Chromosome	1188316	1189776	-	1461	2182
b1130	Chromosome	1189776	1190447	-	672	2866
b1131	Chromosome	1190616	1191986	-	1371	741
b1132	Chromosome	1191990	1192631	-	642	809
b1133	Chromosome	1192667	1193773	-	1107	2119
b1134	Chromosome	1193827	1194288	-	462	300
b1135	Chromosome	1194298	1194951	-	654	546
b1136	Chromosome	1195123	1196373	+	1251	22165
b1137	Chromosome	1196867	1197532	-	666	202
b1138	Chromosome	1197533	1198237	-	705	145
b1139	Chromosome	1198695	1199588	+	894	419
b1140	Chromosome	1199679	1200806	-	1128	41
b1141	Chromosome	1200787	1201032	-	246	21
b1143	Chromosome	1201497	1201838	+	342	187
b1144	Chromosome	1201776	1202084	-	309	87
b1145	Chromosome	1202259	1202933	-	675	274
b1146	Chromosome	1203024	1203224	+	201	52
b1147	Chromosome	1203268	1203825	+	558	18
b1148	Chromosome	1203822	1204160	+	339	7
b1155	Chromosome	1208132	1208545	+	414	1
b1159	Chromosome	1210346	1211179	+	834	102
b1161	Chromosome	1212703	1213107	-	405	11
b1162	Chromosome	1213328	1214059	-	732	591
b1163	Chromosome	1214264	1215475	-	1212	109
b1168	Chromosome	1217328	1218851	+	1524	10
b1171	Chromosome	1222305	1222634	-	330	34
b1172	Chromosome	1222644	1222988	-	345	41
b1174	Chromosome	1224279	1224545	-	267	798
b1175	Chromosome	1224549	1225361	-	813	5518
b1176	Chromosome	1225385	1226080	-	696	4074
b1177	Chromosome	1226600	1226968	+	369	617
b1178	Chromosome	1227071	1227472	-	402	533
b1179	Chromosome	1227714	1228007	+	294	1500
b1180	Chromosome	1228079	1228738	+	660	1027
b1181	Chromosome	1228815	1229276	+	462	371
b1182	Chromosome	1229483	1230394	-	912	197
b1183	Chromosome	1230767	1231186	+	420	112
b1184	Chromosome	1231186	1232454	+	1269	139
b1185	Chromosome	1232500	1233030	-	531	572
b1186	Chromosome	1233176	1234717	-	1542	1794
b1187	Chromosome	1234938	1235657	+	720	2458
b1188	Chromosome	1235709	1237241	-	1533	1552
b1189	Chromosome	1237571	1238869	+	1299	986
b1190	Chromosome	1238879	1239949	+	1071	552
b1191	Chromosome	1240335	1242071	-	1737	1549
b1192	Chromosome	1242166	1243080	-	915	887
b1193	Chromosome	1243180	1243791	+	612	294
b1195	Chromosome	1244728	1244982	+	255	37
b1197	Chromosome	1245679	1247376	-	1698	2945
b1198	Chromosome	1247696	1249114	-	1419	839
b1199	Chromosome	1249125	1249757	-	633	313
b1200	Chromosome	1249768	1250838	-	1071	792
b1201	Chromosome	1251066	1252985	+	1920	431
b1202	Chromosome	1253085	1255952	-	2868	428
b1203	Chromosome	1256721	1257812	-	1092	1623
b1204	Chromosome	1257929	1258513	-	585	557
b1205	Chromosome	1258791	1259069	+	279	5311
b1206	Chromosome	1259124	1260803	-	1680	478
b1207	Chromosome	1260928	1261875	-	948	6338
b1208	Chromosome	1262026	1262877	-	852	3344
b1209	Chromosome	1262877	1263500	-	624	1557
b1210	Chromosome	1263714	1264970	+	1257	2430
b1211	Chromosome	1265012	1266094	+	1083	1659
b1212	Chromosome	1266094	1266927	+	834	396
b1213	Chromosome	1266924	1267316	+	393	65
b1214	Chromosome	1267320	1268129	+	810	965
b1215	Chromosome	1268165	1269019	+	855	3309
b1216	Chromosome	1270749	1271849	-	1101	496
b1217	Chromosome	1272119	1272349	+	231	177
b1218	Chromosome	1272507	1273202	+	696	439
b1219	Chromosome	1273246	1273599	-	354	1477
b1220	Chromosome	1273784	1275178	+	1395	325
b1221	Chromosome	1275179	1275829	-	651	761
b1222	Chromosome	1275822	1277618	-	1797	1262
b1223	Chromosome	1277957	1279348	+	1392	725
b1224	Chromosome	1279864	1283607	+	3744	5648
b1225	Chromosome	1283604	1285142	+	1539	1820
b1226	Chromosome	1285139	1285849	+	711	640
b1227	Chromosome	1285849	1286526	+	678	385
b1232	Chromosome	1287782	1288624	-	843	1505
b1233	Chromosome	1288674	1289132	-	459	684
b1234	Chromosome	1289245	1290150	+	906	2181
b1235	Chromosome	1290242	1291255	+	1014	2011
b1236	Chromosome	1291457	1292365	+	909	2404
b1237	Chromosome	1292509	1292922	-	414	27676
b1238	Chromosome	1293527	1294144	+	618	309
b1241	Chromosome	1295446	1298121	-	2676	66047
b1242	Chromosome	1298598	1299245	+	648	536
b1243	Chromosome	1301182	1302813	+	1632	37169
b1244	Chromosome	1302899	1303819	+	921	5010
b1245	Chromosome	1303834	1304742	+	909	4615
b1246	Chromosome	1304754	1305767	+	1014	4651
b1247	Chromosome	1305764	1306768	+	1005	4503
b1248	Chromosome	1306821	1307150	-	330	310
b1249	Chromosome	1307185	1308645	-	1461	1404
b1250	Chromosome	1309016	1310269	-	1254	522
b1251	Chromosome	1310569	1310865	-	297	1312
b1252	Chromosome	1311089	1311808	+	720	402
b1253	Chromosome	1311848	1312246	-	399	142
b1254	Chromosome	1312351	1312890	-	540	685
b1255	Chromosome	1312920	1313663	-	744	795
b1256	Chromosome	1314020	1314658	+	639	76450
b1257	Chromosome	1314718	1315224	-	507	977
b1258	Chromosome	1315270	1315770	-	501	54
b1259	Chromosome	1315856	1316035	-	180	5
b1260	Chromosome	1316416	1317222	-	807	311
b1261	Chromosome	1317222	1318415	-	1194	537
b1262	Chromosome	1318427	1319788	-	1362	330
b1263	Chromosome	1319789	1321384	-	1596	113
b1264	Chromosome	1321384	1322946	-	1563	42
b1266	Chromosome	1323220	1324101	+	882	1357
b1267	Chromosome	1324098	1324718	+	621	2752
b1268	Chromosome	1324746	1326641	+	1896	354
b1269	Chromosome	1326852	1327727	+	876	914
b1270	Chromosome	1327767	1328357	-	591	578
b1271	Chromosome	1328354	1329112	-	759	942
b1272	Chromosome	1329332	1330381	+	1050	1627
b1273	Chromosome	1330417	1330668	-	252	1279
b1274	Chromosome	1331048	1333645	+	2598	3037
b1275	Chromosome	1333855	1334829	+	975	1652
b1276	Chromosome	1335831	1338506	+	2676	8872
b1277	Chromosome	1338570	1339160	-	591	2308
b1278	Chromosome	1339330	1340094	+	765	719
b1279	Chromosome	1340243	1340551	+	309	771
b1280	Chromosome	1340558	1341727	+	1170	1649
b1281	Chromosome	1341921	1342658	+	738	403
b1282	Chromosome	1342658	1342984	+	327	48
b1283	Chromosome	1343110	1343328	-	219	460
b1284	Chromosome	1343597	1344346	-	750	1315
b1285	Chromosome	1344757	1346742	-	1986	545
b1286	Chromosome	1346978	1348912	-	1935	1812
b1287	Chromosome	1348980	1350107	-	1128	217
b1288	Chromosome	1350251	1351039	-	789	8969
b1289	Chromosome	1351407	1351760	-	354	60
b1290	Chromosome	1351828	1352634	-	807	478
b1291	Chromosome	1352636	1353628	-	993	853
b1292	Chromosome	1353628	1354518	-	891	286
b1293	Chromosome	1354505	1355470	-	966	375
b1294	Chromosome	1355467	1357110	-	1644	2184
b1295	Chromosome	1357423	1357668	-	246	199
b1296	Chromosome	1357802	1359187	-	1386	63
b1297	Chromosome	1359490	1360908	-	1419	94
b1298	Chromosome	1361120	1361884	+	765	67
b1299	Chromosome	1361911	1362468	+	558	220
b1300	Chromosome	1362743	1364230	+	1488	67
b1301	Chromosome	1364232	1365512	+	1281	20
b1302	Chromosome	1365550	1366815	+	1266	111
b1303	Chromosome	1366935	1367912	-	978	791
b1304	Chromosome	1368079	1368747	+	669	870
b1305	Chromosome	1368801	1369025	+	225	52
b1306	Chromosome	1369025	1369384	+	360	54
b1307	Chromosome	1369393	1369614	+	222	47
b1308	Chromosome	1369689	1370003	+	315	7773
b1309	Chromosome	1370216	1371895	+	1680	107
b1310	Chromosome	1371909	1373201	+	1293	56
b1312	Chromosome	1374090	1374932	+	843	18
b1313	Chromosome	1374963	1376015	+	1053	89
b1314	Chromosome	1376034	1376822	+	789	44
b1315	Chromosome	1376832	1377887	+	1056	112
b1316	Chromosome	1377884	1380151	+	2268	121
b1319	Chromosome	1381947	1382852	+	906	6
b1320	Chromosome	1382963	1383961	-	999	225
b1321	Chromosome	1384117	1385514	+	1398	382
b1322	Chromosome	1385511	1386572	+	1062	243
b1323	Chromosome	1386720	1388261	+	1542	3945
b1324	Chromosome	1388305	1388811	-	507	8538
b1325	Chromosome	1388930	1389895	+	966	950
b1326	Chromosome	1389870	1390598	-	729	466
b1327	Chromosome	1390933	1391853	-	921	125
b1328	Chromosome	1391991	1392890	+	900	305
b1329	Chromosome	1393227	1394840	+	1614	1574
b1330	Chromosome	1394891	1395922	-	1032	225
b1331	Chromosome	1396076	1397092	+	1017	2076
b1332	Chromosome	1397365	1397622	+	258	357
b1333	Chromosome	1397672	1398622	-	951	13325
b1334	Chromosome	1398774	1399526	-	753	3780
b1335	Chromosome	1399721	1400236	-	516	365
b1336	Chromosome	1400247	1401773	-	1527	117
b1337	Chromosome	1401810	1403255	-	1446	129
b1338	Chromosome	1403255	1404565	-	1311	57
b1339	Chromosome	1404741	1405649	+	909	376
b1340	Chromosome	1405979	1406542	+	564	148
b1341	Chromosome	1406563	1407795	-	1233	1231
b1342	Chromosome	1408050	1409033	+	984	1108
b1343	Chromosome	1409511	1410884	+	1374	403
b1344	Chromosome	1411013	1411948	-	936	493
b1345	Chromosome	1412000	1413235	-	1236	53
b1349	Chromosome	1413984	1414793	-	810	16
b1350	Chromosome	1414786	1417386	-	2601	77
b1351	Chromosome	1417488	1417763	-	276	2
b1352	Chromosome	1418008	1418229	-	222	1
b1356	Chromosome	1419765	1420241	-	477	1529
b1357	Chromosome	1420365	1420661	+	297	79
b1358	Chromosome	1420684	1421106	+	423	17
b1359	Chromosome	1421119	1421976	+	858	44
b1360	Chromosome	1421983	1422729	+	747	17
b1363	Chromosome	1423782	1425239	+	1458	180
b1365	Chromosome	1425377	1425640	+	264	2
b1370	Chromosome	1427746	1428726	-	981	288
b1372	Chromosome	1429049	1432411	+	3363	135
b1373	Chromosome	1432411	1432986	+	576	26
b1374	Chromosome	1433084	1433674	-	591	37
b1375	Chromosome	1433991	1434224	-	234	8
b1376	Chromosome	1435185	1435619	-	435	3255
b1377	Chromosome	1435760	1436893	-	1134	9
b1378	Chromosome	1437260	1440784	-	3525	6692
b1379	Chromosome	1441321	1441743	-	423	830
b1380	Chromosome	1441854	1442843	-	990	1008
b1381	Chromosome	1443051	1445690	+	2640	837
b1383	Chromosome	1445880	1446206	+	327	131
b1384	Chromosome	1446378	1447283	-	906	77
b1385	Chromosome	1447519	1449018	+	1500	177
b1386	Chromosome	1449076	1451349	-	2274	158
b1387	Chromosome	1451597	1453642	-	2046	46
b1388	Chromosome	1453927	1454856	+	930	21
b1389	Chromosome	1454868	1455155	+	288	2
b1390	Chromosome	1455164	1455910	+	747	12
b1391	Chromosome	1455925	1456422	+	498	26
b1393	Chromosome	1457497	1458264	+	768	39
b1394	Chromosome	1458264	1459052	+	789	20
b1395	Chromosome	1459054	1460481	+	1428	38
b1398	Chromosome	1462125	1463438	+	1314	168
b1399	Chromosome	1463539	1464489	+	951	1016
b1400	Chromosome	1464471	1465061	+	591	368
b1402	Chromosome	1467921	1468826	-	906	421
b1403	Chromosome	1468784	1469149	-	366	271
b1404	Chromosome	1469358	1470509	+	1152	400
b1406	Chromosome	1474221	1475081	+	861	1853
b1407	Chromosome	1475144	1477450	+	2307	110
b1409	Chromosome	1478226	1479122	+	897	3
b1410	Chromosome	1479138	1480895	+	1758	71
b1411	Chromosome	1480909	1482201	+	1293	197
b1412	Chromosome	1482255	1482860	-	606	546
b1413	Chromosome	1483061	1486963	+	3903	4672
b1414	Chromosome	1487235	1488035	+	801	420
b1415	Chromosome	1488232	1489671	+	1440	1706
b1418	Chromosome	1490902	1491432	+	531	751
b1419	Chromosome	1491677	1491850	+	174	730
b1421	Chromosome	1492470	1494110	+	1641	181
b1422	Chromosome	1494148	1495071	-	924	166
b1423	Chromosome	1495288	1496631	+	1344	1065
b1424	Chromosome	1496856	1498511	+	1656	1633
b1426	Chromosome	1498651	1498875	+	225	3269
b1427	Chromosome	1498938	1499477	+	540	1019
b1428	Chromosome	1499469	1500449	-	981	147
b1429	Chromosome	1500573	1501565	+	993	315
b1430	Chromosome	1501562	1502155	+	594	643
b1431	Chromosome	1502457	1503125	+	669	1241
b1432	Chromosome	1503717	1504865	+	1149	569
b1433	Chromosome	1504905	1506080	-	1176	616
b1434	Chromosome	1506172	1506708	+	537	248
b1435	Chromosome	1506781	1508742	+	1962	935
b1436	Chromosome	1508834	1509064	-	231	17
b1438	Chromosome	1509508	1509924	+	417	238
b1439	Chromosome	1510003	1511409	+	1407	318
b1440	Chromosome	1511654	1512799	+	1146	1322
b1441	Chromosome	1512817	1513830	+	1014	435
b1442	Chromosome	1513831	1514772	+	942	236
b1443	Chromosome	1514762	1515556	+	795	593
b1444	Chromosome	1515578	1517002	+	1425	808
b1446	Chromosome	1517648	1517881	+	234	267
b1447	Chromosome	1517882	1518331	-	450	145
b1448	Chromosome	1518328	1518846	-	519	530
b1449	Chromosome	1519027	1520064	+	1038	2419
b1450	Chromosome	1520262	1520927	+	666	119
b1451	Chromosome	1520963	1523065	-	2103	116
b1452	Chromosome	1523307	1524368	+	1062	50
b1453	Chromosome	1524481	1525980	-	1500	76
b1454	Chromosome	1526247	1526864	+	618	94
b1457	Chromosome	1529922	1530404	+	483	2
b1460	Chromosome	1531816	1532952	+	1137	10
b1461	Chromosome	1533052	1533285	+	234	202
b1462	Chromosome	1533282	1533851	-	570	218
b1463	Chromosome	1534024	1534869	+	846	159
b1464	Chromosome	1534965	1535858	-	894	736
b1465	Chromosome	1535937	1536617	-	681	51
b1466	Chromosome	1536614	1537309	-	696	44
b1467	Chromosome	1537309	1538853	-	1545	124
b1468	Chromosome	1538850	1542590	-	3741	518
b1469	Chromosome	1542672	1544060	-	1389	132
b1473	Chromosome	1546288	1547169	-	882	422
b1474	Chromosome	1547401	1550448	+	3048	928
b1475	Chromosome	1550461	1551345	+	885	207
b1476	Chromosome	1551338	1551991	+	654	102
b1477	Chromosome	1552398	1552682	-	285	520
b1478	Chromosome	1552828	1553838	-	1011	329
b1479	Chromosome	1553972	1555669	-	1698	6675
b1480	Chromosome	1555826	1555963	-	138	2543
b1481	Chromosome	1556065	1556280	-	216	13
b1482	Chromosome	1556625	1557056	+	432	1396
b1483	Chromosome	1557112	1558038	-	927	138
b1484	Chromosome	1558031	1559017	-	987	62
b1485	Chromosome	1559014	1559910	-	897	52
b1486	Chromosome	1559907	1560929	-	1023	16
b1487	Chromosome	1560931	1562481	-	1551	96
b1488	Chromosome	1562495	1563076	-	582	29
b1489	Chromosome	1563334	1565733	-	2400	99
b1490	Chromosome	1565758	1567140	-	1383	60
b1491	Chromosome	1567504	1568823	-	1320	289
b1492	Chromosome	1568954	1570489	-	1536	614
b1493	Chromosome	1570645	1572045	-	1401	920
b1494	Chromosome	1572407	1575202	-	2796	97
b1495	Chromosome	1575247	1577619	-	2373	30
b1496	Chromosome	1577657	1579342	-	1686	10
b1497	Chromosome	1579633	1580790	-	1158	567
b1498	Chromosome	1580842	1582524	-	1683	17282
b1501	Chromosome	1584207	1586486	-	2280	84
b1502	Chromosome	1586820	1587734	-	915	2
b1507	Chromosome	1590854	1592176	-	1323	476
b1508	Chromosome	1592176	1592442	-	267	166
b1511	Chromosome	1598617	1600209	-	1593	517
b1512	Chromosome	1600288	1601241	-	954	620
b1513	Chromosome	1601490	1603025	+	1536	182
b1514	Chromosome	1603019	1604047	+	1029	66
b1515	Chromosome	1604047	1605039	+	993	103
b1516	Chromosome	1605051	1606073	+	1023	333
b1517	Chromosome	1606100	1606975	+	876	350
b1518	Chromosome	1606999	1607289	+	291	194
b1519	Chromosome	1607346	1608104	+	759	480
b1520	Chromosome	1608108	1609022	-	915	183
b1521	Chromosome	1609229	1610680	-	1452	5517
b1522	Chromosome	1610907	1611854	-	948	185
b1523	Chromosome	1611966	1612325	-	360	314
b1524	Chromosome	1612325	1613251	-	927	650
b1525	Chromosome	1613315	1614703	-	1389	700
b1526	Chromosome	1614804	1615685	+	882	201
b1527	Chromosome	1615763	1616878	+	1116	10
b1528	Chromosome	1617028	1618218	+	1191	222
b1529	Chromosome	1618243	1618908	-	666	627
b1530	Chromosome	1619120	1619554	+	435	343
b1531	Chromosome	1619574	1619957	+	384	218
b1532	Chromosome	1619989	1620207	+	219	12
b1533	Chromosome	1620238	1621137	-	900	255
b1534	Chromosome	1621332	1622519	+	1188	236
b1535	Chromosome	1622960	1623850	-	891	119
b1537	Chromosome	1624773	1625291	+	519	61
b1538	Chromosome	1625335	1627380	-	2046	2615
b1539	Chromosome	1627517	1628263	+	747	8173
b1540	Chromosome	1628352	1629038	+	687	1692
b1541	Chromosome	1629215	1629418	+	204	444
b1542	Chromosome	1629453	1630913	-	1461	71
b1545	Chromosome	1633622	1634212	+	591	35
b1546	Chromosome	1634310	1634885	-	576	16
b1547	Chromosome	1634885	1635847	-	963	36
b1549	Chromosome	1637047	1637457	+	411	24
b1550	Chromosome	1637609	1637782	-	174	33
b1555	Chromosome	1640054	1640365	-	312	6
b1556	Chromosome	1640370	1640585	-	216	1
b1559	Chromosome	1642489	1643241	-	753	38
b1560	Chromosome	1643255	1644304	-	1050	34
b1561	Chromosome	1644651	1644902	-	252	11
b1563	Chromosome	1645346	1645633	-	288	263
b1564	Chromosome	1645633	1645872	-	240	256
b1566	Chromosome	1646405	1646737	+	333	17
b1569	Chromosome	1647620	1647850	-	231	3
b1570	Chromosome	1647934	1648341	+	408	839
b1573	Chromosome	1648823	1649041	+	219	40
b1580	Chromosome	1652896	1653915	-	1020	17
b1581	Chromosome	1653927	1655141	-	1215	90
b1582	Chromosome	1655347	1655673	-	327	109
b1583	Chromosome	1655808	1656149	+	342	1406
b1584	Chromosome	1656184	1656744	+	561	1138
b1585	Chromosome	1656747	1657457	-	711	490
b1586	Chromosome	1657565	1657870	+	306	352
b1587	Chromosome	1658069	1660495	+	2427	19615
b1588	Chromosome	1660556	1662979	+	2424	24445
b1589	Chromosome	1662990	1663607	+	618	3733
b1590	Chromosome	1663609	1664463	+	855	4951
b1591	Chromosome	1664506	1665120	+	615	1940
b1592	Chromosome	1665315	1666571	+	1257	174
b1593	Chromosome	1666524	1667219	-	696	2519
b1594	Chromosome	1667344	1668564	-	1221	3612
b1595	Chromosome	1668699	1669592	-	894	235
b1596	Chromosome	1669699	1670952	+	1254	1441
b1597	Chromosome	1671376	1671684	+	309	42
b1598	Chromosome	1671960	1672781	+	822	1230
b1600	Chromosome	1673136	1673501	-	366	882
b1601	Chromosome	1673913	1674947	+	1035	383
b1602	Chromosome	1674972	1676360	-	1389	4864
b1603	Chromosome	1676371	1677903	-	1533	7257
b1604	Chromosome	1678427	1679371	+	945	2621
b1605	Chromosome	1679557	1680939	+	1383	103
b1606	Chromosome	1680976	1681698	+	723	314
b1607	Chromosome	1681695	1682030	-	336	130
b1608	Chromosome	1682159	1682878	+	720	1093
b1609	Chromosome	1682882	1684183	+	1302	767
b1610	Chromosome	1684259	1685188	+	930	261
b1611	Chromosome	1685185	1686588	-	1404	1388
b1612	Chromosome	1686731	1688377	-	1647	3876
b1613	Chromosome	1688576	1689751	+	1176	2918
b1614	Chromosome	1689852	1691360	+	1509	9917
b1615	Chromosome	1691586	1692851	-	1266	4
b1616	Chromosome	1692890	1694263	-	1374	47
b1617	Chromosome	1694260	1696071	-	1812	226
b1618	Chromosome	1696462	1697052	-	591	1087
b1619	Chromosome	1697273	1698040	-	768	2504
b1620	Chromosome	1698152	1699180	-	1029	304
b1621	Chromosome	1699355	1700947	+	1593	795
b1622	Chromosome	1700957	1702129	+	1173	974
b1623	Chromosome	1702233	1703234	+	1002	3549
b1624	Chromosome	1703268	1704308	-	1041	1031
b1626	Chromosome	1705250	1705690	+	441	250
b1627	Chromosome	1705767	1706348	+	582	148
b1628	Chromosome	1706348	1706926	+	579	128
b1629	Chromosome	1706919	1709141	+	2223	292
b1630	Chromosome	1709142	1710200	+	1059	106
b1631	Chromosome	1710204	1710824	+	621	54
b1632	Chromosome	1710828	1711523	+	696	61
b1633	Chromosome	1711523	1712158	+	636	42
b1634	Chromosome	1712769	1714271	+	1503	1584
b1635	Chromosome	1714377	1714982	+	606	1864
b1636	Chromosome	1715026	1715889	-	864	1319
b1637	Chromosome	1715948	1717222	-	1275	5998
b1638	Chromosome	1717351	1718007	-	657	2059
b1639	Chromosome	1718066	1718395	-	330	199
b1640	Chromosome	1718493	1719602	-	1110	1585
b1641	Chromosome	1719876	1720343	+	468	12225
b1642	Chromosome	1720390	1720824	-	435	1507
b1643	Chromosome	1721025	1721261	+	237	75
b1644	Chromosome	1721264	1722121	+	858	155
b1645	Chromosome	1722121	1724133	+	2013	298
b1646	Chromosome	1724134	1724655	-	522	1449
b1647	Chromosome	1724736	1725632	-	897	6500
b1649	Chromosome	1726023	1726622	+	600	174
b1650	Chromosome	1726659	1727756	+	1098	665
b1651	Chromosome	1727837	1728244	+	408	2512
b1652	Chromosome	1728347	1728994	+	648	646
b1653	Chromosome	1729087	1733703	+	4617	1324
b1654	Chromosome	1733754	1734101	-	348	2634
b1655	Chromosome	1734435	1735250	+	816	803
b1656	Chromosome	1735378	1735959	+	582	36114
b1657	Chromosome	1736121	1737290	-	1170	303
b1658	Chromosome	1737844	1738869	+	1026	1153
b1659	Chromosome	1738866	1739798	-	933	180
b1660	Chromosome	1739911	1741122	+	1212	204
b1661	Chromosome	1741413	1742561	+	1149	6056
b1662	Chromosome	1742601	1743242	-	642	2341
b1663	Chromosome	1743457	1744830	+	1374	774
b1664	Chromosome	1744871	1746127	-	1257	1651
b1667	Chromosome	1746700	1747005	+	306	1762
b1668	Chromosome	1747131	1748735	+	1605	473
b1669	Chromosome	1748747	1749559	-	813	873
b1670	Chromosome	1749563	1750348	-	786	1572
b1671	Chromosome	1750345	1751013	-	669	2846
b1672	Chromosome	1751077	1751724	-	648	3931
b1673	Chromosome	1751728	1753830	-	2103	20870
b1674	Chromosome	1753851	1754477	-	627	11818
b1675	Chromosome	1754932	1755141	-	210	77
b1676	Chromosome	1755698	1757110	+	1413	14722
b1677	Chromosome	1757421	1757657	+	237	37771
b1678	Chromosome	1757721	1758725	-	1005	3332
b1679	Chromosome	1758874	1759290	-	417	177
b1680	Chromosome	1759303	1760523	-	1221	836
b1681	Chromosome	1760520	1761791	-	1272	747
b1682	Chromosome	1761766	1762512	-	747	326
b1683	Chromosome	1762522	1764009	-	1488	801
b1684	Chromosome	1764018	1764386	-	369	304
b1685	Chromosome	1764934	1765122	-	189	821
b1686	Chromosome	1765222	1765632	-	411	203
b1687	Chromosome	1765629	1768685	-	3057	3336
b1688	Chromosome	1769074	1770186	+	1113	940
b1689	Chromosome	1770615	1770971	+	357	81
b1690	Chromosome	1771071	1772285	+	1215	86
b1691	Chromosome	1772512	1773777	+	1266	10
b1692	Chromosome	1773789	1774655	+	867	57
b1693	Chromosome	1774686	1775444	+	759	713
b1694	Chromosome	1775587	1777182	+	1596	25
b1695	Chromosome	1777196	1778347	+	1152	42
b1696	Chromosome	1778390	1779301	-	912	98
b1697	Chromosome	1779617	1780381	+	765	56
b1698	Chromosome	1780401	1781339	+	939	65
b1699	Chromosome	1781395	1782684	+	1290	57
b1700	Chromosome	1782681	1782974	+	294	30
b1701	Chromosome	1783031	1784677	+	1647	40
b1702	Chromosome	1784734	1787112	-	2379	8122
b1703	Chromosome	1787445	1788278	+	834	533
b1704	Chromosome	1788435	1789481	+	1047	415
b1705	Chromosome	1789613	1789804	+	192	37
b1706	Chromosome	1789808	1791244	-	1437	964
b1707	Chromosome	1791307	1792020	-	714	910
b1708	Chromosome	1792267	1792731	-	465	1092
b1709	Chromosome	1792809	1793558	-	750	562
b1710	Chromosome	1793558	1794109	-	552	544
b1711	Chromosome	1794172	1795152	-	981	515
b1712	Chromosome	1795253	1795552	-	300	5094
b1713	Chromosome	1795557	1797944	-	2388	5615
b1714	Chromosome	1797959	1798942	-	984	2570
b1716	Chromosome	1799393	1799749	-	357	11618
b1717	Chromosome	1799802	1799999	-	198	4038
b1718	Chromosome	1800096	1800638	-	543	10841
b1719	Chromosome	1800642	1802570	-	1929	28431
b1722	Chromosome	1805325	1806083	-	759	273
b1723	Chromosome	1806370	1807299	+	930	3236
b1724	Chromosome	1807400	1807690	+	291	448
b1725	Chromosome	1807796	1808656	+	861	9685
b1726	Chromosome	1808697	1809233	-	537	475
b1727	Chromosome	1809380	1810048	+	669	1061
b1728	Chromosome	1810211	1810801	+	591	97
b1729	Chromosome	1810934	1812325	+	1392	1315
b1732	Chromosome	1813867	1816128	+	2262	1170
b1733	Chromosome	1816386	1817135	-	750	535
b1734	Chromosome	1817148	1818500	-	1353	1023
b1735	Chromosome	1818605	1819447	-	843	1364
b1736	Chromosome	1819455	1819805	-	351	614
b1737	Chromosome	1819856	1821214	-	1359	2106
b1738	Chromosome	1821299	1821619	-	321	1818
b1739	Chromosome	1821918	1822256	-	339	3692
b1740	Chromosome	1822458	1823285	+	828	2830
b1741	Chromosome	1823515	1824402	+	888	489
b1742	Chromosome	1824362	1824937	-	576	65
b1743	Chromosome	1825140	1825625	-	486	186
b1745	Chromosome	1826916	1828259	-	1344	68
b1746	Chromosome	1828256	1829734	-	1479	93
b1747	Chromosome	1829731	1830765	-	1035	25
b1748	Chromosome	1830762	1831982	-	1221	22
b1749	Chromosome	1832428	1833234	+	807	916
b1750	Chromosome	1833401	1834111	+	711	546
b1751	Chromosome	1834116	1834793	+	678	622
b1752	Chromosome	1834808	1835515	+	708	316
b1753	Chromosome	1835515	1836063	+	549	236
b1754	Chromosome	1836073	1837239	+	1167	680
b1755	Chromosome	1837212	1838747	+	1536	271
b1756	Chromosome	1838747	1839400	+	654	136
b1757	Chromosome	1839467	1840774	+	1308	3313
b1758	Chromosome	1840783	1841403	-	621	196
b1761	Chromosome	1842371	1843714	+	1344	2479
b1763	Chromosome	1844999	1846960	-	1962	3245
b1764	Chromosome	1846965	1848008	-	1044	4571
b1765	Chromosome	1848125	1848676	-	552	1222
b1766	Chromosome	1848837	1850693	+	1857	1502
b1767	Chromosome	1850860	1851876	+	1017	966
b1768	Chromosome	1851887	1852528	+	642	466
b1769	Chromosome	1852621	1853979	-	1359	55
b1770	Chromosome	1854096	1854854	-	759	190
b1771	Chromosome	1854991	1855971	-	981	83
b1772	Chromosome	1855981	1856928	-	948	59
b1773	Chromosome	1856933	1857769	-	837	80
b1774	Chromosome	1857790	1858833	-	1044	31
b1775	Chromosome	1858850	1860229	-	1380	22
b1776	Chromosome	1860256	1861332	-	1077	89
b1777	Chromosome	1861702	1861974	-	273	366
b1778	Chromosome	1862016	1862429	-	414	938
b1779	Chromosome	1862771	1863766	+	996	79709
b1780	Chromosome	1863850	1864734	+	885	2778
b1781	Chromosome	1864782	1865636	-	855	659
b1782	Chromosome	1865726	1866472	-	747	1760
b1783	Chromosome	1866908	1868842	+	1935	6209
b1784	Chromosome	1868955	1870238	+	1284	970
b1785	Chromosome	1870385	1871860	+	1476	14
b1787	Chromosome	1873574	1874077	+	504	1322
b1789	Chromosome	1874352	1874798	+	447	269
b1790	Chromosome	1874755	1875576	-	822	278
b1791	Chromosome	1875673	1876854	+	1182	241
b1792	Chromosome	1876909	1877256	+	348	1606
b1793	Chromosome	1877278	1877532	-	255	297
b1794	Chromosome	1877715	1878740	+	1026	2020
b1795	Chromosome	1879007	1879255	-	249	219
b1796	Chromosome	1879403	1879585	-	183	19
b1797	Chromosome	1879589	1879948	-	360	16
b1798	Chromosome	1880121	1880759	-	639	440
b1799	Chromosome	1880886	1881809	-	924	1078
b1800	Chromosome	1881912	1882997	+	1086	305
b1801	Chromosome	1883188	1884633	+	1446	50
b1802	Chromosome	1884665	1885789	+	1125	102
b1803	Chromosome	1885845	1886810	+	966	54
b1804	Chromosome	1886864	1887991	-	1128	431
b1805	Chromosome	1888061	1889746	-	1686	363
b1806	Chromosome	1889951	1890532	-	582	456
b1807	Chromosome	1890572	1891267	-	696	1032
b1808	Chromosome	1891325	1893235	-	1911	1305
b1809	Chromosome	1893367	1893711	+	345	1133
b1810	Chromosome	1894133	1894432	+	300	214
b1811	Chromosome	1894552	1894731	-	180	55
b1812	Chromosome	1894805	1896166	+	1362	581
b1813	Chromosome	1896170	1896748	+	579	576
b1814	Chromosome	1896932	1898296	+	1365	6488
b1815	Chromosome	1898427	1900025	+	1599	178
b1816	Chromosome	1900029	1901585	-	1557	4281
b1817	Chromosome	1902048	1903019	+	972	75496
b1818	Chromosome	1903082	1903882	+	801	36975
b1819	Chromosome	1903895	1904746	+	852	44027
b1820	Chromosome	1904801	1905259	+	459	682
b1821	Chromosome	1905688	1906254	+	567	137
b1822	Chromosome	1906251	1907060	-	810	381
b1823	Chromosome	1907226	1907435	-	210	5826
b1824	Chromosome	1907448	1907591	-	144	3471
b1825	Chromosome	1908261	1908548	-	288	118
b1826	Chromosome	1908623	1908766	-	144	120
b1827	Chromosome	1909308	1910099	-	792	1559
b1828	Chromosome	1910276	1911649	+	1374	265
b1829	Chromosome	1911695	1912576	-	882	1419
b1830	Chromosome	1912768	1914816	-	2049	4283
b1831	Chromosome	1914836	1915534	-	699	3535
b1832	Chromosome	1915631	1916128	-	498	1650
b1833	Chromosome	1916258	1917541	+	1284	539
b1834	Chromosome	1917510	1920143	+	2634	1643
b1835	Chromosome	1920223	1921662	+	1440	518
b1836	Chromosome	1921780	1922016	+	237	250
b1837	Chromosome	1922121	1922312	+	192	102
b1839	Chromosome	1923365	1923706	-	342	489
b1840	Chromosome	1923719	1924591	-	873	1016
b1841	Chromosome	1924595	1924969	-	375	898
b1842	Chromosome	1925108	1925338	+	231	145
b1843	Chromosome	1925440	1926096	+	657	474
b1844	Chromosome	1926120	1926782	+	663	612
b1845	Chromosome	1926779	1928839	-	2061	1272
b1846	Chromosome	1929048	1929707	-	660	706
b1847	Chromosome	1930034	1930390	-	357	499
b1848	Chromosome	1930457	1930747	-	291	485
b1849	Chromosome	1930881	1932059	+	1179	181
b1850	Chromosome	1932115	1932756	-	642	2840
b1851	Chromosome	1932793	1934604	-	1812	2500
b1852	Chromosome	1934839	1936314	-	1476	4212
b1853	Chromosome	1936652	1937521	+	870	1782
b1854	Chromosome	1937649	1939091	+	1443	20147
b1855	Chromosome	1939222	1940193	-	972	1528
b1856	Chromosome	1940313	1941635	-	1323	2264
b1857	Chromosome	1941651	1942583	-	933	1047
b1858	Chromosome	1942662	1943417	+	756	710
b1859	Chromosome	1943414	1944199	+	786	259
b1860	Chromosome	1944346	1945356	-	1011	937
b1861	Chromosome	1945365	1945976	-	612	1404
b1862	Chromosome	1946251	1946853	+	603	21
b1863	Chromosome	1946855	1947376	-	522	1200
b1864	Chromosome	1947411	1948151	-	741	3934
b1865	Chromosome	1948180	1948632	-	453	1926
b1866	Chromosome	1948750	1950522	-	1773	10796
b1867	Chromosome	1950832	1951398	+	567	1387
b1868	Chromosome	1951395	1952213	+	819	429
b1869	Chromosome	1952266	1952661	+	396	773
b1870	Chromosome	1952702	1953445	+	744	591
b1871	Chromosome	1953442	1954413	+	972	373
b1872	Chromosome	1954578	1957007	-	2430	217
b1873	Chromosome	1957032	1958132	-	1101	36
b1874	Chromosome	1958520	1959266	-	747	543
b1875	Chromosome	1959280	1959846	-	567	380
b1876	Chromosome	1960062	1961795	+	1734	2107
b1877	Chromosome	1961972	1962460	+	489	11
b1879	Chromosome	1962972	1965050	-	2079	266
b1880	Chromosome	1965043	1966191	-	1149	117
b1881	Chromosome	1966393	1967037	-	645	116
b1883	Chromosome	1967452	1968501	-	1050	88
b1885	Chromosome	1969383	1970984	-	1602	93
b1886	Chromosome	1971030	1972691	-	1662	177
b1887	Chromosome	1972836	1973339	-	504	75
b1888	Chromosome	1973360	1975324	-	1965	156
b1889	Chromosome	1975329	1976255	-	927	87
b1891	Chromosome	1977266	1977844	-	579	412
b1892	Chromosome	1977847	1978197	-	351	324
b1893	Chromosome	1978518	1979021	-	504	56
b1895	Chromosome	1979753	1980181	+	429	1021
b1896	Chromosome	1980188	1981612	-	1425	2197
b1897	Chromosome	1981587	1982387	-	801	1260
b1900	Chromosome	1983555	1985069	-	1515	1280
b1901	Chromosome	1985139	1986128	-	990	2559
b1902	Chromosome	1986925	1987428	+	504	2578
b1905	Chromosome	1988716	1989213	+	498	8861
b1906	Chromosome	1989251	1989490	-	240	179
b1907	Chromosome	1989681	1990892	+	1212	367
b1908	Chromosome	1990954	1991619	-	666	3752
b1912	Chromosome	1992269	1992817	-	549	1494
b1913	Chromosome	1992874	1994706	-	1833	3372
b1914	Chromosome	1994703	1995359	-	657	2959
b1915	Chromosome	1995818	1996042	+	225	43
b1916	Chromosome	1996110	1996832	-	723	129
b1917	Chromosome	1997062	1997814	-	753	530
b1918	Chromosome	1997811	1998479	-	669	420
b1919	Chromosome	1998494	1999480	-	987	1198
b1920	Chromosome	1999585	2000385	-	801	2685
b1921	Chromosome	2000473	2001024	-	552	146
b1922	Chromosome	2001070	2001789	-	720	284
b1923	Chromosome	2002110	2003606	-	1497	1779
b1924	Chromosome	2003872	2005278	+	1407	116
b1925	Chromosome	2005303	2005713	+	411	41
b1927	Chromosome	2006156	2007643	+	1488	1174
b1928	Chromosome	2007677	2008090	-	414	903
b1929	Chromosome	2008277	2009482	+	1206	2491
b1930	Chromosome	2009479	2009712	+	234	444
b1931	Chromosome	2009821	2010489	+	669	91
b1932	Chromosome	2010600	2011079	+	480	48
b1938	Chromosome	2013229	2014887	+	1659	339
b1939	Chromosome	2014880	2015875	+	996	306
b1941	Chromosome	2016554	2017927	+	1374	311
b1942	Chromosome	2017946	2018389	+	444	35
b1943	Chromosome	2018386	2019513	+	1128	214
b1944	Chromosome	2019618	2020082	+	465	280
b1945	Chromosome	2020087	2021091	+	1005	451
b1946	Chromosome	2021088	2021501	+	414	163
b1949	Chromosome	2022616	2022885	+	270	13
b1950	Chromosome	2022893	2023678	+	786	60
b1951	Chromosome	2023968	2024591	+	624	28
b1952	Chromosome	2024635	2024823	-	189	7
b1953	Chromosome	2024986	2025213	+	228	331
b1955	Chromosome	2025511	2026326	+	816	654
b1956	Chromosome	2026323	2028017	-	1695	899
b1957	Chromosome	2028188	2028370	-	183	191
b1958	Chromosome	2028449	2029366	-	918	710
b1959	Chromosome	2029539	2030459	+	921	177
b1960	Chromosome	2030448	2030918	-	471	70
b1961	Chromosome	2030899	2032317	-	1419	1928
b1962	Chromosome	2032384	2033079	-	696	480
b1963	Chromosome	2033119	2033484	-	366	32
b1967	Chromosome	2035835	2036686	+	852	2943
b1968	Chromosome	2036794	2038152	-	1359	255
b1969	Chromosome	2038152	2038823	-	672	228
b1970	Chromosome	2038956	2039369	+	414	29
b1971	Chromosome	2039478	2040482	+	1005	386
b1972	Chromosome	2040483	2041118	+	636	85
b1973	Chromosome	2041375	2042025	+	651	64
b1976	Chromosome	2043651	2044448	+	798	3394
b1978	Chromosome	2044938	2052014	+	7077	1063
b1981	Chromosome	2053643	2054959	+	1317	851
b1982	Chromosome	2055061	2056515	+	1455	3073
b1983	Chromosome	2056858	2057574	+	717	1819
b1985	Chromosome	2058203	2059690	-	1488	352
b1987	Chromosome	2059964	2060914	-	951	47
b1988	Chromosome	2061016	2061933	-	918	84
b1990	Chromosome	2062391	2063323	-	933	986
b1991	Chromosome	2063388	2064467	-	1080	1011
b1992	Chromosome	2064479	2065222	-	744	476
b1993	Chromosome	2065219	2065764	-	546	185
b1996	Chromosome	2068952	2069857	-	906	382
b1997	Chromosome	2069815	2070180	-	366	241
b2000	Chromosome	2071539	2074658	+	3120	1935
b2001	Chromosome	2074779	2076311	+	1533	178
b2003	Chromosome	2076817	2077038	+	222	27
b2004	Chromosome	2077112	2077480	+	369	50
b2007	Chromosome	2079032	2079361	-	330	4344
b2008	Chromosome	2079533	2080591	-	1059	644
b2009	Chromosome	2080789	2081262	-	474	1044
b2010	Chromosome	2081381	2082547	-	1167	259
b2011	Chromosome	2082756	2084183	+	1428	1964
b2012	Chromosome	2084226	2084453	-	228	93
b2013	Chromosome	2084467	2085525	-	1059	98
b2014	Chromosome	2085704	2087062	-	1359	202
b2015	Chromosome	2087329	2088258	-	930	380
b2016	Chromosome	2088304	2089128	-	825	3317
b2017	Chromosome	2089462	2089713	-	252	334
b2019	Chromosome	2090192	2091091	+	900	934
b2020	Chromosome	2091097	2092401	+	1305	970
b2021	Chromosome	2092398	2093468	+	1071	664
b2022	Chromosome	2093468	2094535	+	1068	1117
b2023	Chromosome	2094535	2095125	+	591	401
b2024	Chromosome	2095125	2095862	+	738	469
b2025	Chromosome	2095844	2096620	+	777	460
b2026	Chromosome	2096614	2097225	+	612	701
b2027	Chromosome	2097321	2098301	-	981	2197
b2028	Chromosome	2098447	2099613	-	1167	347
b2029	Chromosome	2099862	2101268	-	1407	14395
b2030	Chromosome	2101895	2102911	-	1017	2235
b2032	Chromosome	2103391	2104509	-	1119	461
b2033	Chromosome	2104494	2105084	-	591	518
b2034	Chromosome	2105065	2106057	-	993	802
b2035	Chromosome	2106060	2107226	-	1167	212
b2036	Chromosome	2107226	2108329	-	1104	726
b2037	Chromosome	2108337	2109584	-	1248	251
b2038	Chromosome	2109581	2110138	-	558	283
b2039	Chromosome	2110138	2111019	-	882	1124
b2040	Chromosome	2111077	2111976	-	900	808
b2041	Chromosome	2111976	2113061	-	1086	1465
b2042	Chromosome	2113434	2114327	-	894	4086
b2043	Chromosome	2114502	2115896	-	1395	150
b2044	Chromosome	2115907	2117127	-	1221	79
b2045	Chromosome	2117124	2118404	-	1281	62
b2046	Chromosome	2118680	2120158	-	1479	55
b2047	Chromosome	2120160	2121554	-	1395	30
b2048	Chromosome	2121609	2122979	-	1371	23
b2049	Chromosome	2123084	2124520	-	1437	35
b2050	Chromosome	2124523	2125746	-	1224	27
b2052	Chromosome	2126225	2127190	-	966	18
b2053	Chromosome	2127193	2128314	-	1122	36
b2056	Chromosome	2129661	2130878	-	1218	2
b2057	Chromosome	2130853	2132070	-	1218	25
b2058	Chromosome	2132067	2132555	-	489	9
b2059	Chromosome	2132558	2133397	-	840	14
b2060	Chromosome	2133490	2135652	-	2163	37
b2061	Chromosome	2135655	2136098	-	444	7
b2063	Chromosome	2137902	2139485	+	1584	1557
b2064	Chromosome	2139759	2141612	-	1854	3006
b2065	Chromosome	2141634	2142215	-	582	1723
b2066	Chromosome	2142307	2142948	-	642	861
b2067	Chromosome	2143266	2146583	+	3318	1057
b2068	Chromosome	2146692	2147540	-	849	446
b2069	Chromosome	2147674	2149026	+	1353	254
b2070	Chromosome	2149039	2150985	-	1947	168
b2074	Chromosome	2154016	2155263	+	1248	244
b2075	Chromosome	2155263	2158385	+	3123	369
b2076	Chromosome	2158386	2161463	+	3078	205
b2077	Chromosome	2161464	2162879	+	1416	88
b2078	Chromosome	2162876	2164279	+	1404	117
b2079	Chromosome	2164276	2164998	+	723	400
b2080	Chromosome	2165189	2165521	+	333	282
b2081	Chromosome	2165668	2167029	+	1362	550
b2085	Chromosome	2167989	2168306	-	318	20
b2086	Chromosome	2168712	2169611	+	900	340
b2088	Chromosome	2170236	2170535	+	300	87
b2089	Chromosome	2170532	2171398	+	867	1043
b2091	Chromosome	2171833	2172873	-	1041	55315
b2093	Chromosome	2174282	2174566	-	285	51816
b2094	Chromosome	2174597	2175049	-	453	71480
b2095	Chromosome	2175059	2176321	-	1263	337658
b2096	Chromosome	2176350	2177204	-	855	257589
b2097	Chromosome	2177512	2178564	-	1053	7756
b2098	Chromosome	2178821	2180098	+	1278	102
b2099	Chromosome	2180095	2181099	+	1005	188
b2100	Chromosome	2181096	2182061	+	966	148
b2101	Chromosome	2182035	2182781	-	747	578
b2102	Chromosome	2182833	2183651	-	819	200
b2103	Chromosome	2183716	2184516	-	801	101
b2104	Chromosome	2184513	2185301	-	789	148
b2105	Chromosome	2185524	2185796	-	273	157
b2106	Chromosome	2185917	2186741	+	825	47
b2107	Chromosome	2186960	2187298	+	339	217
b2108	Chromosome	2187380	2188414	-	1035	6
b2109	Chromosome	2188430	2190910	-	2481	71
b2111	Chromosome	2191680	2192222	-	543	409
b2112	Chromosome	2192515	2192796	-	282	88
b2113	Chromosome	2193059	2194168	-	1110	8342
b2114	Chromosome	2194300	2196333	+	2034	3635
b2118	Chromosome	2200279	2203911	+	3633	187
b2119	Chromosome	2204596	2205684	+	1089	6
b2120	Chromosome	2205695	2207974	+	2280	80
b2121	Chromosome	2207967	2209103	+	1137	24
b2124	Chromosome	2211726	2212196	-	471	1046
b2125	Chromosome	2212243	2212962	-	720	1194
b2126	Chromosome	2212959	2214644	-	1686	2167
b2127	Chromosome	2214866	2215597	+	732	473
b2128	Chromosome	2215745	2216476	-	732	196
b2129	Chromosome	2216481	2217407	-	927	314
b2130	Chromosome	2217400	2218557	-	1158	340
b2131	Chromosome	2218564	2219481	-	918	963
b2132	Chromosome	2219692	2221989	-	2298	3204
b2133	Chromosome	2222185	2223900	+	1716	6547
b2134	Chromosome	2223938	2224870	-	933	1364
b2135	Chromosome	2225044	2225631	-	588	127
b2136	Chromosome	2225801	2226379	+	579	841
b2137	Chromosome	2226509	2227270	-	762	422
b2140	Chromosome	2229438	2230385	-	948	135
b2141	Chromosome	2230624	2231022	+	399	236
b2142	Chromosome	2231019	2231714	+	696	488
b2143	Chromosome	2231844	2232728	+	885	1506
b2144	Chromosome	2232878	2233597	+	720	154
b2145	Chromosome	2233600	2233839	+	240	127
b2146	Chromosome	2234033	2235271	+	1239	34913
b2147	Chromosome	2235265	2236500	+	1236	28145
b2148	Chromosome	2236743	2237753	-	1011	638
b2149	Chromosome	2237769	2239289	-	1521	558
b2150	Chromosome	2239350	2240348	-	999	5002
b2151	Chromosome	2240628	2241668	-	1041	708
b2152	Chromosome	2241810	2242967	-	1158	269
b2153	Chromosome	2242984	2243652	-	669	2091
b2154	Chromosome	2243910	2244746	+	837	1900
b2155	Chromosome	2244778	2246769	-	1992	177
b2156	Chromosome	2247063	2248532	-	1470	1173
b2157	Chromosome	2248737	2249618	-	882	1315
b2158	Chromosome	2249717	2250766	+	1050	303
b2159	Chromosome	2250840	2251697	+	858	1269
b2160	Chromosome	2251700	2252788	+	1089	586
b2161	Chromosome	2252895	2254145	-	1251	56
b2162	Chromosome	2254245	2255186	-	942	34
b2164	Chromosome	2256085	2257335	-	1251	104
b2165	Chromosome	2257429	2258367	-	939	9
b2166	Chromosome	2258355	2259296	-	942	9
b2167	Chromosome	2259719	2261410	-	1692	1680
b2168	Chromosome	2261427	2262365	-	939	951
b2169	Chromosome	2262365	2263495	-	1131	901
b2170	Chromosome	2263863	2265044	+	1182	268
b2171	Chromosome	2265450	2266022	+	573	487
b2172	Chromosome	2266245	2267711	+	1467	1153
b2173	Chromosome	2267829	2268815	+	987	340
b2174	Chromosome	2268854	2269567	+	714	169
b2175	Chromosome	2269979	2270545	+	567	7980
b2176	Chromosome	2270726	2272282	+	1557	632
b2177	Chromosome	2272364	2274178	+	1815	1105
b2178	Chromosome	2274179	2275273	+	1095	222
b2179	Chromosome	2275273	2276298	+	1026	356
b2180	Chromosome	2276300	2277889	+	1590	1157
b2181	Chromosome	2277893	2278237	-	345	567
b2182	Chromosome	2278570	2279760	-	1191	719
b2183	Chromosome	2279788	2280483	-	696	1826
b2184	Chromosome	2280632	2282392	+	1761	907
b2185	Chromosome	2282517	2282801	+	285	1996
b2186	Chromosome	2282940	2283947	-	1008	1568
b2187	Chromosome	2284129	2284356	+	228	518
b2188	Chromosome	2284376	2286136	+	1761	1697
b2192	Chromosome	2289065	2290081	-	1017	2158
b2193	Chromosome	2290500	2291147	+	648	1338
b2194	Chromosome	2291358	2292410	-	1053	573
b2195	Chromosome	2292407	2292964	-	558	227
b2196	Chromosome	2292961	2294904	-	1944	796
b2197	Chromosome	2294901	2295380	-	480	263
b2198	Chromosome	2295377	2295586	-	210	37
b2199	Chromosome	2295583	2296320	-	738	895
b2200	Chromosome	2296362	2297024	-	663	280
b2201	Chromosome	2297021	2297644	-	624	574
b2202	Chromosome	2297657	2298259	-	603	602
b2203	Chromosome	2298269	2298718	-	450	160
b2204	Chromosome	2298715	2299578	-	864	180
b2205	Chromosome	2299565	2300260	-	696	300
b2206	Chromosome	2300267	2302753	-	2487	2082
b2207	Chromosome	2302750	2303013	-	264	27
b2209	Chromosome	2303905	2304393	+	489	3551
b2210	Chromosome	2305108	2306754	-	1647	203
b2211	Chromosome	2306972	2308615	-	1644	113
b2212	Chromosome	2308691	2309341	-	651	112
b2213	Chromosome	2309341	2310405	-	1065	556
b2214	Chromosome	2310479	2311534	-	1056	331
b2215	Chromosome	2311646	2312749	-	1104	312353
b2216	Chromosome	2313488	2316160	+	2673	4178
b2217	Chromosome	2316177	2316827	+	651	6954
b2218	Chromosome	2317027	2319876	-	2850	1857
b2219	Chromosome	2320043	2321869	+	1827	1518
b2220	Chromosome	2321866	2323251	+	1386	1839
b2221	Chromosome	2323447	2324109	+	663	32
b2222	Chromosome	2324109	2324759	+	651	10
b2223	Chromosome	2324756	2326078	+	1323	32
b2225	Chromosome	2327367	2328143	-	777	32
b2226	Chromosome	2328148	2329797	-	1650	90
b2229	Chromosome	2334336	2334959	-	624	27
b2230	Chromosome	2334956	2336644	-	1689	150
b2231	Chromosome	2336793	2339420	-	2628	10771
b2232	Chromosome	2339567	2340289	+	723	1089
b2233	Chromosome	2340417	2344169	-	3753	942
b2234	Chromosome	2344865	2347150	+	2286	4280
b2235	Chromosome	2347384	2348514	+	1131	2217
b2237	Chromosome	2348822	2349472	-	651	475
b2239	Chromosome	2349935	2351011	-	1077	1103
b2240	Chromosome	2351016	2352374	-	1359	1313
b2241	Chromosome	2352647	2354275	+	1629	230
b2242	Chromosome	2354265	2355524	+	1260	195
b2243	Chromosome	2355521	2356711	+	1191	145
b2244	Chromosome	2356904	2357803	+	900	61
b2245	Chromosome	2358042	2358845	-	804	184
b2246	Chromosome	2358863	2360152	-	1290	186
b2247	Chromosome	2360209	2361414	-	1206	766
b2248	Chromosome	2361429	2362211	-	783	125
b2249	Chromosome	2362431	2363633	-	1203	2420
b2250	Chromosome	2363733	2364275	-	543	52
b2251	Chromosome	2364554	2364979	+	426	338
b2252	Chromosome	2365018	2365620	-	603	6
b2253	Chromosome	2365928	2367067	+	1140	169
b2254	Chromosome	2367071	2368039	+	969	58
b2255	Chromosome	2368039	2370021	+	1983	282
b2257	Chromosome	2370908	2372560	+	1653	74
b2258	Chromosome	2372892	2373278	+	387	138
b2259	Chromosome	2373272	2373538	-	267	287
b2260	Chromosome	2373648	2375003	-	1356	913
b2261	Chromosome	2375000	2375962	-	963	1987
b2262	Chromosome	2375962	2376819	-	858	2594
b2263	Chromosome	2376834	2377592	-	759	575
b2264	Chromosome	2377589	2379259	-	1671	3006
b2265	Chromosome	2379348	2380643	-	1296	2386
b2266	Chromosome	2380722	2381027	-	306	9025
b2267	Chromosome	2381082	2381543	-	462	343
b2268	Chromosome	2381608	2382525	+	918	540
b2269	Chromosome	2382713	2383924	+	1212	24
b2270	Chromosome	2383995	2385722	-	1728	51
b2272	Chromosome	2386934	2387437	+	504	63
b2273	Chromosome	2387710	2388426	-	717	7
b2274	Chromosome	2388635	2389057	+	423	7
b2275	Chromosome	2389116	2389964	+	849	114
b2276	Chromosome	2390048	2391505	-	1458	9983
b2277	Chromosome	2391512	2393041	-	1530	12666
b2278	Chromosome	2393205	2395046	-	1842	17726
b2279	Chromosome	2395043	2395345	-	303	1431
b2280	Chromosome	2395342	2395896	-	555	4427
b2281	Chromosome	2395908	2396450	-	543	3317
b2282	Chromosome	2396465	2397442	-	978	7113
b2283	Chromosome	2397439	2400165	-	2727	24655
b2284	Chromosome	2400218	2401555	-	1338	9148
b2285	Chromosome	2401552	2402052	-	501	4425
b2286	Chromosome	2402055	2403845	-	1791	15502
b2287	Chromosome	2403951	2404613	-	663	7426
b2288	Chromosome	2404629	2405072	-	444	7166
b2289	Chromosome	2405703	2406641	-	939	3974
b2290	Chromosome	2407561	2408778	+	1218	2397
b2291	Chromosome	2408862	2409461	+	600	504
b2292	Chromosome	2409520	2411352	-	1833	2993
b2293	Chromosome	2411439	2412089	-	651	2642
b2294	Chromosome	2412100	2412594	-	495	5066
b2295	Chromosome	2412677	2413132	-	456	1039
b2296	Chromosome	2413470	2414672	+	1203	18442
b2297	Chromosome	2414747	2416891	+	2145	19660
b2298	Chromosome	2417081	2418601	+	1521	918
b2299	Chromosome	2418634	2419176	-	543	789
b2300	Chromosome	2419234	2419788	-	555	942
b2301	Chromosome	2419841	2420485	-	645	322
b2302	Chromosome	2420621	2421268	+	648	347
b2303	Chromosome	2421325	2421687	+	363	397
b2304	Chromosome	2421708	2422601	+	894	2063
b2306	Chromosome	2423736	2424509	-	774	47
b2307	Chromosome	2424517	2425233	-	717	99
b2308	Chromosome	2425230	2425916	-	687	142
b2309	Chromosome	2426006	2426788	-	783	1455
b2310	Chromosome	2427009	2427791	-	783	171
b2311	Chromosome	2428057	2428626	-	570	139
b2312	Chromosome	2428721	2430238	-	1518	729
b2313	Chromosome	2430275	2430763	-	489	304
b2314	Chromosome	2431022	2431684	-	663	1838
b2315	Chromosome	2431674	2432942	-	1269	1301
b2316	Chromosome	2433012	2433926	-	915	6271
b2317	Chromosome	2434082	2434741	-	660	925
b2318	Chromosome	2434824	2435636	-	813	762
b2319	Chromosome	2435636	2436649	-	1014	1044
b2320	Chromosome	2436715	2437851	-	1137	2575
b2321	Chromosome	2437950	2438945	+	996	352
b2322	Chromosome	2438942	2440120	-	1179	109
b2323	Chromosome	2440385	2441605	-	1221	41965
b2324	Chromosome	2441764	2443770	+	2007	2411
b2325	Chromosome	2443891	2444169	-	279	300
b2326	Chromosome	2444203	2444751	-	549	508
b2327	Chromosome	2444751	2445560	-	810	649
b2328	Chromosome	2445560	2446384	-	825	492
b2329	Chromosome	2446388	2447473	-	1086	1449
b2330	Chromosome	2447508	2448440	-	933	1493
b2331	Chromosome	2448606	2449157	+	552	615
b2332	Chromosome	2449228	2450049	-	822	789
b2333	Chromosome	2450051	2450590	-	540	28
b2336	Chromosome	2451584	2452336	-	753	16
b2340	Chromosome	2456327	2456812	-	486	846
b2341	Chromosome	2457015	2459159	-	2145	1170
b2342	Chromosome	2459159	2460469	-	1311	724
b2343	Chromosome	2460650	2460934	-	285	11955
b2344	Chromosome	2461306	2462646	+	1341	1259
b2345	Chromosome	2463012	2464070	+	1059	16
b2346	Chromosome	2464252	2465007	-	756	922
b2347	Chromosome	2465301	2466233	+	933	261
b2349	Chromosome	2466545	2467702	+	1158	205
b2350	Chromosome	2467855	2468217	+	363	446
b2351	Chromosome	2468214	2469134	+	921	670
b2352	Chromosome	2469131	2470462	+	1332	54
b2360	Chromosome	2474032	2474856	+	825	56
b2362	Chromosome	2475511	2475873	+	363	5
b2364	Chromosome	2476694	2477629	-	936	191
b2365	Chromosome	2477847	2479184	+	1338	77
b2366	Chromosome	2479202	2480530	+	1329	422
b2367	Chromosome	2480638	2482176	-	1539	4
b2368	Chromosome	2482176	2483339	-	1164	21
b2369	Chromosome	2483755	2484369	+	615	2528
b2370	Chromosome	2484374	2487967	+	3594	1914
b2371	Chromosome	2488023	2489168	-	1146	10
b2372	Chromosome	2489242	2490186	-	945	4
b2373	Chromosome	2490256	2491950	-	1695	25
b2375	Chromosome	2493767	2494402	-	636	16
b2376	Chromosome	2494698	2494973	+	276	14
b2377	Chromosome	2495050	2495292	-	243	344
b2378	Chromosome	2495645	2496565	+	921	1962
b2379	Chromosome	2497057	2498295	-	1239	2767
[truncated: 1,814 more rows]
